# Supplementary material for: SIRT5 Contributes to Colorectal Cancer Growth by Regulating T Cell Activity
Source: Hindawi journal article supplement (doi:10.1155/2020/3792409), 2020-01-01
Supplement: f1 [file 3792409.f1.pdf]

## Supplementary Materials for

### SIRT5 contributes to colorectal cancer growth by regulating T cell activity

Ke Wang<sup>1</sup>, Zuojian Hu<sup>2</sup>, Cuiping Zhang<sup>1,2,3</sup>, Lujie Yang<sup>1</sup>, Li Feng<sup>1</sup>, Pengyuan Yang<sup>1\*</sup>, Hongxiu Yu<sup>1\*</sup>

<sup>1</sup> Institutes of Biomedical Sciences & Minhang Hospital, Shanghai Medical College, Fudan University, Shanghai, 200032, P. R. China

<sup>2</sup> Department of Clinical Laboratory, First Affiliated Hospital of Guangxi Medical University, Nanning 530021, Guangxi, P. R. China

<sup>3</sup> Huashan Hospital, Shanghai Medical College, Fudan University, Shanghai, 200032, P. R. China

\*Correspondence: Hongxiu Yu, 86-21-54237664, hongxiuyu@fudan.edu.cn

Pengyuan Yang, 86-21-65642009, [pyyang@fudan.edu.cn](mailto:pyyang@fudan.edu.cn)

## **Supplementary Description**

The provided supplementary materials include: Supplementary Figure S1-3, Supplementary Table S1-3 related to Figure S2, Supplementary Table S4 (Key reagents used in this study), and Supplementary Table S5 (Proteome data of mouse T cells).

## Supplementary Figures

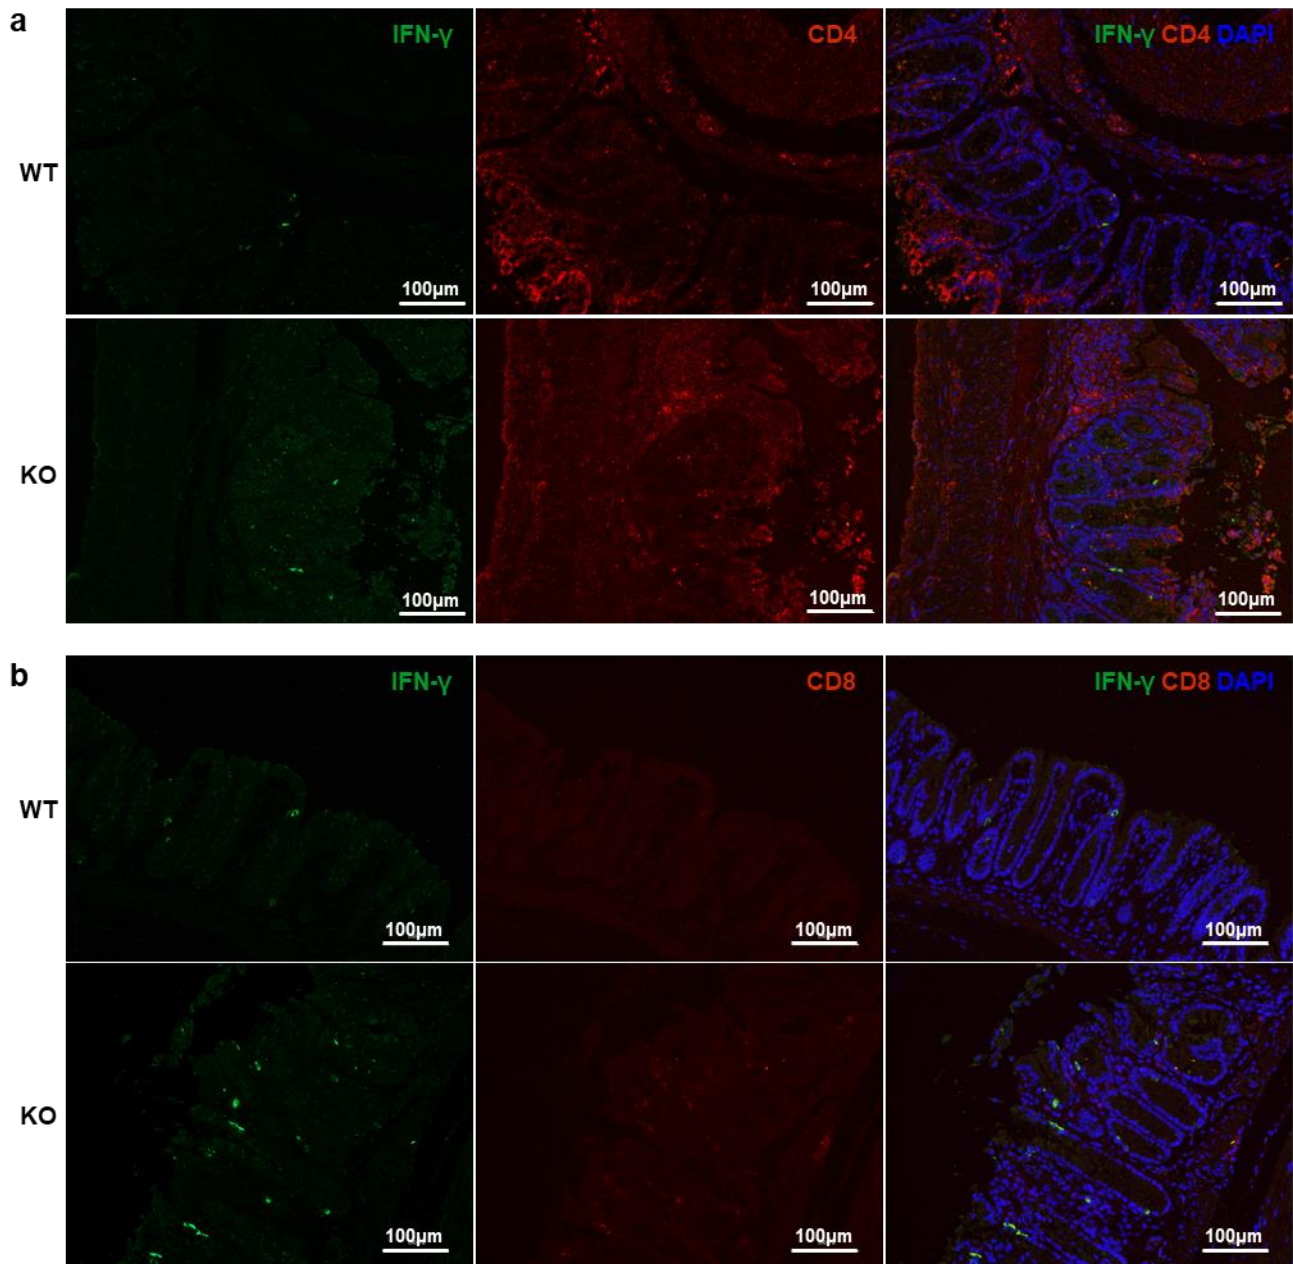

**Figure S1: IFN- $\gamma$  expression is stronger in *Sirt5* KO mouse colons than WT.** (a) Immunofluorescent staining of IFN- $\gamma$  (green), CD4 (red) and DAPI in colons of WT and *Sirt5* KO mice. (b) Immunofluorescent staining of IFN- $\gamma$  (green), CD8 (red) and DAPI in colons of WT and *Sirt5* KO mice. Scale bars, 100 $\mu$ m.

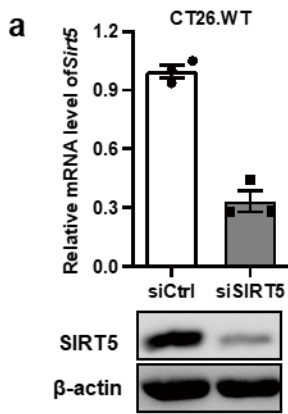

**Table S1.** q-PCR results of CT26.WT cells

| $C_T$     | $\beta$ -actin | <i>Sirt5</i> | <i>lfn-\gamma</i> |
|-----------|----------------|--------------|-------------------|
| siCtrl-1  | 18.46101       | 25.56109     | 37.254            |
| siCtrl-2  | 18.42109       | 25.61451     | 31.72735          |
| siCtrl-3  | 18.42713       | 25.4565      | 35.67849          |
| siSIRT5-1 | 18.1814        | 27.09653     | 34.13985          |
| siSIRT5-2 | 18.18288       | 27.13223     | 36.8396           |
| siSIRT5-3 | 18.386         | 26.6641      | 36.21816          |

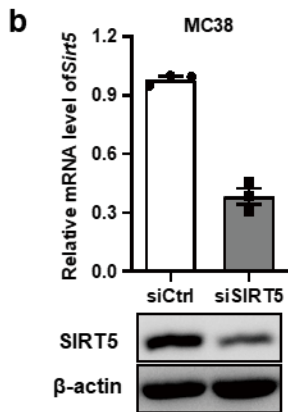

**Table S2.** q-PCR results of MC38 cells

| $C_T$     | $\beta$ -actin | <i>Sirt5</i> | <i>lfn-\gamma</i> |
|-----------|----------------|--------------|-------------------|
| siCtrl-1  | 18.33359       | 25.51329     | 31.35804          |
| siCtrl-2  | 18.31202       | 25.49912     | 36.85187          |
| siCtrl-3  | 18.36246       | 25.61673     | Undetermined      |
| siSIRT5-1 | 17.77926       | 26.09526     | 36.09354          |
| siSIRT5-2 | 17.59424       | 26.14183     | 34.63812          |
| siSIRT5-3 | 17.59907       | 26.47321     | 32.45946          |

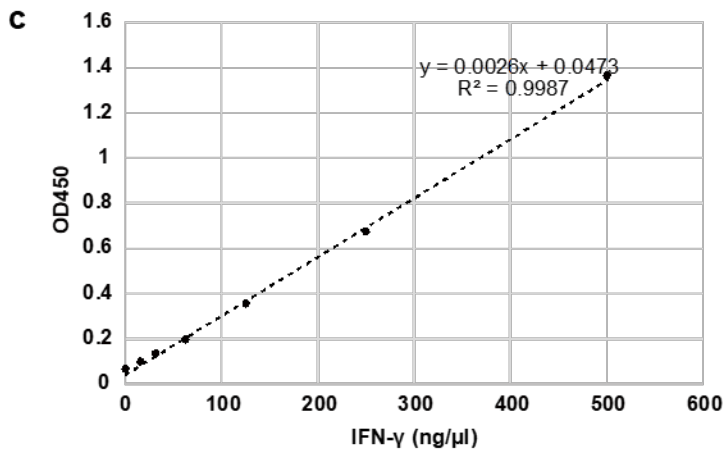

**Table S3.** Results in ELISA experiments

| Samples |           | OD450 |
|---------|-----------|-------|
| CT26.WT | siCtrl-1  | 0.063 |
|         | siCtrl-2  | 0.064 |
|         | siCtrl-3  | 0.064 |
|         | siSIRT5-1 | 0.064 |
|         | siSIRT5-2 | 0.062 |
|         | siSIRT5-3 | 0.063 |
| MC38    | siCtrl-1  | 0.063 |
|         | siCtrl-2  | 0.065 |
|         | siCtrl-3  | 0.064 |
|         | siSIRT5-1 | 0.064 |
|         | siSIRT5-2 | 0.064 |
|         | siSIRT5-3 | 0.064 |

**Figure S2: SIRT5 has no effects on IFN- $\gamma$  production of mouse colon cancer cells.** (a) Verification of SIRT5 knockdown by *Sirt5*-specific siRNA in CT26.WT. (b) Verification of SIRT5 knockdown by *Sirt5*-specific siRNA in MC38. (c) Standard curve of ELISA experiment for detection of IFN- $\gamma$  in the supernatant. Table S1-2 show  $C_T$  values of  $\beta$ -actin, *Sirt5*, and *lfn-\gamma*, corresponding to Figure S1(a-b). Table S3 shows ELISA results, corresponding to Figure S1(c).

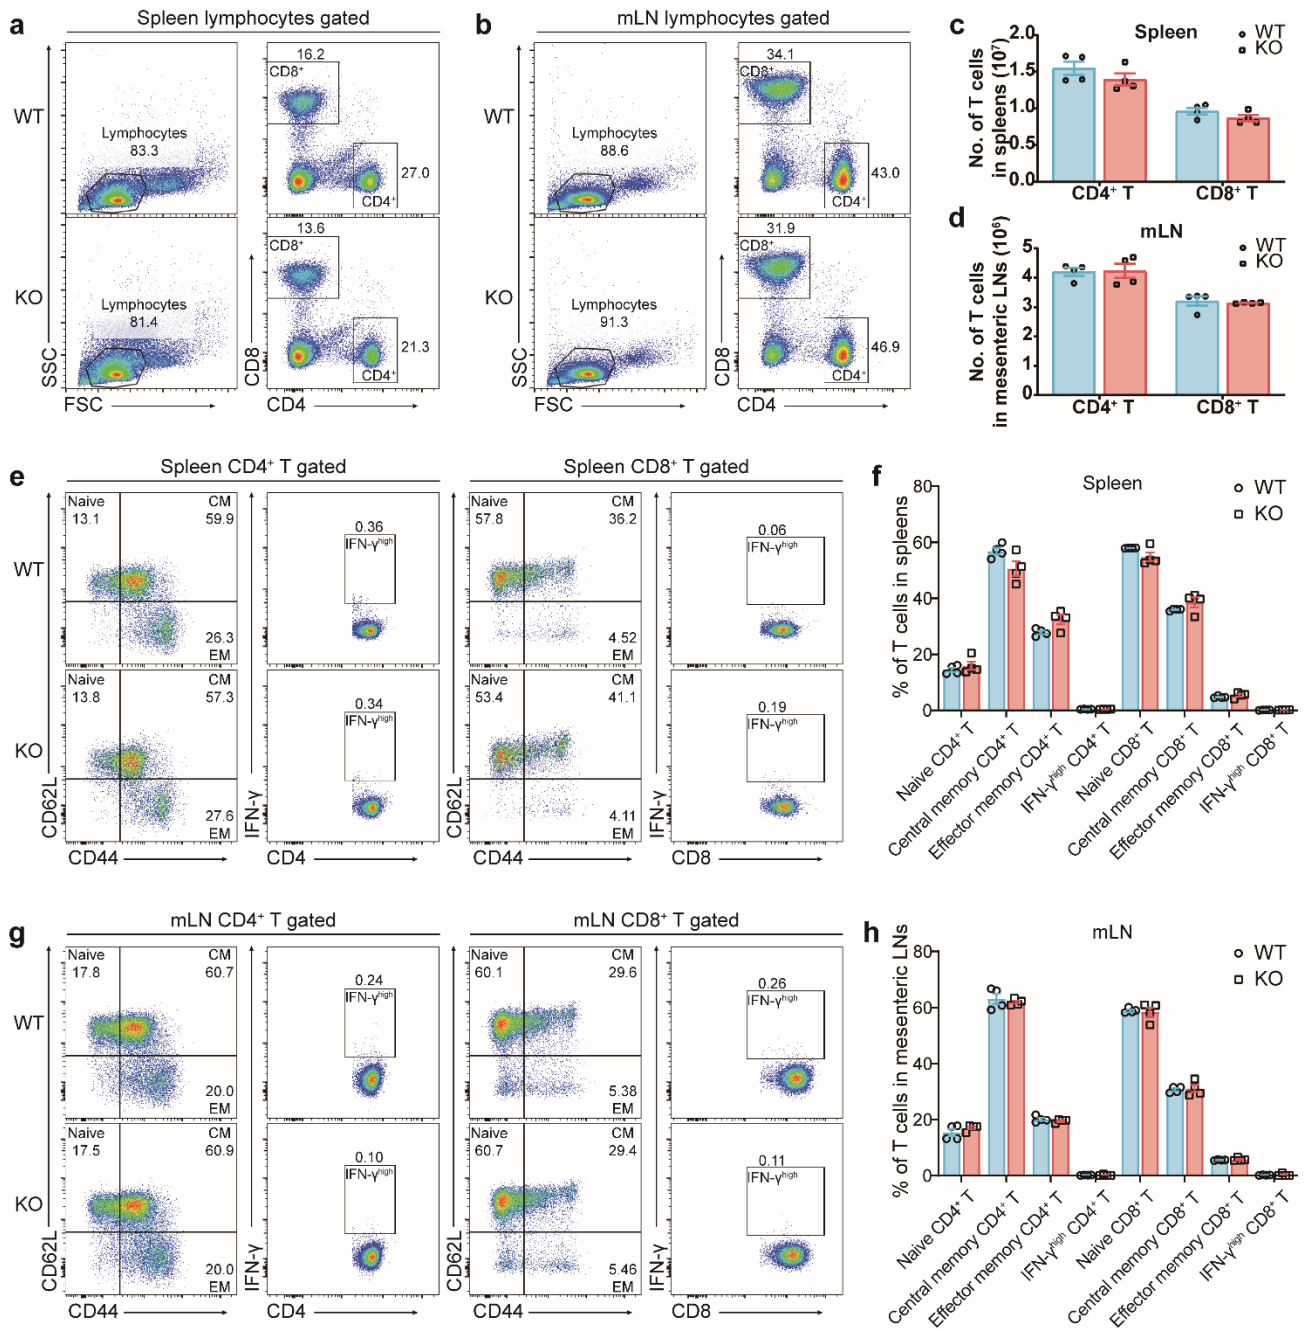

**Figure S3: SIRT5 plays a limited role in T cell development under the steady states.** (a) Representative histograms of CD4 and CD8 of spleen T cells from WT and *Sirt5* KO mice using flow cytometry. (b) Representative histograms of CD4 and CD8 of mLN T cells from WT and *Sirt5* KO mice using flow cytometry. (c) Absolute number of spleen CD4<sup>+</sup> and CD8<sup>+</sup> T cells. (d) Absolute number of mLN CD4<sup>+</sup> and CD8<sup>+</sup> T cells. (e) Flow cytometry of spleen T cells from WT and *Sirt5* KO mice, assessing the expression of CD44 and CD62L on CD4<sup>+</sup> and CD8<sup>+</sup> T cells. (f) Quantification of the percentage of naïve (CD44<sup>low</sup>CD62L<sup>+</sup>), central memory (CD44<sup>high</sup>CD62L<sup>+</sup>), and effector memory (CD44<sup>high</sup>CD62L<sup>-</sup>) T cells in (e). (g) Flow cytometry of mLN T cells from WT and *Sirt5* KO mice, assessing the expression of CD44 and CD62L on CD4<sup>+</sup> and CD8<sup>+</sup> T cells. (h) Quantification of the percentage of naïve (CD44<sup>low</sup>CD62L<sup>+</sup>), central memory (CD44<sup>high</sup>CD62L<sup>+</sup>), and effector memory (CD44<sup>high</sup>CD62L<sup>-</sup>) T cells in (g). The data are expressed as the mean  $\pm$  SEM of four independent experiments. Two-tail unpaired t-test.

**Supplementary Table S4. Key reagents**

| REAGENT OR RESOURCE                                                                                | SOURCE                | IDENTIFIER         |
|----------------------------------------------------------------------------------------------------|-----------------------|--------------------|
| <b>Antibodies and Recombinant proteins</b>                                                         |                       |                    |
| CD3e Monoclonal Antibody, Functional Grade                                                         | eBioscience           | Cat#16-0031-82     |
| CD28 Monoclonal Antibody, Functional Grade                                                         | eBioscience           | Cat#16-0281-82     |
| BV510 Rat Anti-Mouse CD8a (Clone 53-6.7)                                                           | BD Biosciences        | Cat#563068         |
| PE Rat Anti-Mouse CD8a (Clone 53-6.7)                                                              | BD Biosciences        | Cat#553032         |
| PerCP-Cy <sup>TM</sup> 5.5 Rat Anti-Mouse CD4 (Clone RM4-5)                                        | BD Biosciences        | Cat#550954         |
| FITC Rat Anti-Mouse CD44 (Clone IM7)                                                               | BD Biosciences        | Cat#561859         |
| APC Rat Anti-Mouse CD62L (Clone MEL-14)                                                            | BD Biosciences        | Cat#553152         |
| BV605 Hamster Anti-Mouse CD69 (Clone H1.2F3)                                                       | BD Biosciences        | Cat#563290         |
| APC Rat Anti-Mouse CD25 (Clone PC61)                                                               | BD Biosciences        | Cat#561048         |
| BV421 Rat Anti-Mouse IFN- $\gamma$ (Clone XMG1.2)                                                  | BD Biosciences        | Cat#563376         |
| PE Rat anti-Mouse Foxp3 (Clone MF23)                                                               | BD Biosciences        | Cat#560408         |
| TruStain FcX <sup>TM</sup> (anti-mouse CD16/32) Antibody                                           | BioLegend             | Cat#101320         |
| Mouse Anti-CD4 Antibody                                                                            | Bioss Antibodies      | Cat#bsm-33076M     |
| Mouse Anti-CD8 alpha Antibody                                                                      | Abcam                 | Cat#ab25478        |
| Mouse Anti-IFN gamma Antibody                                                                      | Servicebio            | Cat#GB11107-1      |
| Recombinant Murine IFN- $\gamma$                                                                   | PeproTech             | Cat#315-05         |
| <b>Chemicals</b>                                                                                   |                       |                    |
| Dextran sulfate sodium salt (DSS) (36,000-50,000 M.Wt.)                                            | MP Biomedicals        | Cat#02160110       |
| Azoxymethane (AOM)                                                                                 | Sigma-Aldrich         | Cat#A5486          |
| Leukocyte Activation Cocktail                                                                      | BD Biosciences        | Cat#550583         |
| BD Cytotfix/Cytoperm <sup>TM</sup> Solution Kit                                                    | BD Biosciences        | Cat#554715         |
| BD Transcription Factor Buffer Set                                                                 | BD Biosciences        | Cat#562574         |
| <b>Critical Commercial Assays</b>                                                                  |                       |                    |
| EasySep <sup>TM</sup> Mouse Pan-Naïve T Cell Isolation Kit                                         | STEMCELL Technologies | Cat#19848          |
| IFN gamma Mouse ELISA Kit                                                                          | eBioscience           | Cat#BMS609         |
| Cell Counting Kit-8 Cell Proliferation Assay                                                       | Dojindo Laboratories  | Cat#CK04           |
| iTRAQ Reagents Application Kit                                                                     | AB Sciex              | Cat#4374321        |
| SYBR® Premix Ex Taq <sup>TM</sup> (Tli RNase Plus)                                                 | Takara                | Cat #RR420A        |
| PrimeScript <sup>TM</sup> RT master mix                                                            | Takara                | Cat #RR036A        |
| <b>Primers</b>                                                                                     |                       | <b>Application</b> |
| Mouse siSIRT5<br>Forward: 5'-GCUCGUCCAAGUUCAAAUAAdTdT-3'<br>Reverse: 5'-UAUUUGAACUUGGACGAGCdTdT-3' | siRNA                 |                    |
| Mouse $\beta$ -actin                                                                               | q-PCR                 |                    |

|                                                                                                     |       |
|-----------------------------------------------------------------------------------------------------|-------|
| Forward: 5'-GGCTGTATTCCCCTCCATCG-3'<br>Reverse: 5'-CCAGTTGGTAACAATGCCATGT-3'                        |       |
| Mouse Sirt5<br>Forward: 5'-GTCATCACCCAGAACATCGA-3'<br>Reverse: 5'-ACGTGAGGTCGCAGCAAGCC-3'           | q-PCR |
| Mouse IFN- $\gamma$<br>Forward: 5'-GAACTGGCAAAAGGATGGTGA-3'<br>Reverse: 5'-TGTGGGTTGTTGACCTCAAAC-3' | q-PCR |

**Supplementary Table S5. Proteome data of mouse T cells**

| Accession | Gene Symbol        | # AAs | MW [kDa] | KEGG Pathways                                                                                                                                                                                                                                                   | Abundances |       |       |       |        |       |        |       |
|-----------|--------------------|-------|----------|-----------------------------------------------------------------------------------------------------------------------------------------------------------------------------------------------------------------------------------------------------------------|------------|-------|-------|-------|--------|-------|--------|-------|
|           |                    |       |          |                                                                                                                                                                                                                                                                 | WT-0h      |       | KO-0h |       | WT-48h |       | KO-48h |       |
|           |                    |       |          |                                                                                                                                                                                                                                                                 | R1         | R2    | R1    | R2    | R1     | R2    | R1     | R2    |
| 33859604  | Psmc2              | 475   | 52.8     | Proteasome; Epstein-Barr virus infection                                                                                                                                                                                                                        | 89.9       | 88    | 86.5  | 86.3  | 113.7  | 117   | 107.8  | 110.6 |
| 158635979 | Atp2a2             | 1044  | 114.8    | Hypertrophic cardiomyopathy (HCM); Pancreatic secretion; Arrhythmogenic right ventricular cardiomyopathy (ARVC); Dilated cardiomyopathy; Thyroid hormone signaling pathway; cGMP-PKG signaling pathway; Calcium signaling pathway; Alzheimer's disease; Cardiac | 85         | 85.3  | 76.1  | 78.3  | 123.7  | 123.3 | 109.2  | 110.7 |
| 8393544   | Hnrnpc             | 313   | 34.4     | Spliceosome                                                                                                                                                                                                                                                     | 92.2       | 95.3  | 94.1  | 96    | 102.7  | 101.8 | 97.3   | 94.9  |
| 160333923 | Hnrnpu             | 800   | 87.9     | Spliceosome                                                                                                                                                                                                                                                     | 92.8       | 93.9  | 94.9  | 96.4  | 99.2   | 98.5  | 104    | 104.3 |
| 154350222 | Supt16;<br>Supt16h | 1047  | 119.8    |                                                                                                                                                                                                                                                                 | 94.3       | 94.3  | 98.3  | 97    | 108.4  | 107.6 | 100.2  | 102.1 |
| 83816893  | Ddx5               | 615   | 69.2     | Spliceosome; Transcriptional misregulation in cancer; Proteoglycans in cancer                                                                                                                                                                                   | 88.9       | 88.2  | 91.5  | 91.8  | 106.9  | 108.1 | 114.3  | 114.7 |
| 6755040   | Pfn1               | 140   | 14.9     | Regulation of actin cytoskeleton; Salmonella infection; Rap1 signaling pathway                                                                                                                                                                                  | 112.5      | 112.5 | 124.2 | 124.5 | 73.2   | 74.1  | 81.2   | 81.2  |
| 339895913 | Ap1b1              | 953   | 104.9    | Lysosome                                                                                                                                                                                                                                                        | 102.8      | 102.3 | 103.6 | 102.2 | 93.6   | 96.4  | 96.2   | 95    |
| 254028159 | Safb               | 937   | 105      |                                                                                                                                                                                                                                                                 | 110.4      | 112.4 | 109.7 | 109.6 | 91.1   | 91.3  | 99.8   | 102   |
| 258547152 | Pcdcd6ip           | 874   | 96.7     |                                                                                                                                                                                                                                                                 | 109.7      |       | 112.7 |       | 86.6   |       | 88.6   |       |
| 418203916 | Tpm3               | 248   | 28.9     |                                                                                                                                                                                                                                                                 | 115.4      | 102.3 | 108.5 | 91.9  | 84.2   | 95.9  | 97.8   | 114.5 |
| 67782360  | Esyt2              | 845   | 94.1     |                                                                                                                                                                                                                                                                 | 105.6      | 108   | 90.8  | 86.4  | 96.9   | 101.6 | 90.7   | 89.4  |
| 13937395  | Srrt               | 875   | 100.4    |                                                                                                                                                                                                                                                                 | 103.4      | 104.8 | 101   | 101.2 | 94.6   | 95.9  | 94.2   | 93.5  |
| 356582477 | Ogdh               | 1038  | 118.1    |                                                                                                                                                                                                                                                                 | 107.8      | 109.6 | 105.9 | 106.4 | 94.2   | 94    | 86.4   | 84.5  |
| 31981939  | Tubb4a             | 444   | 49.6     | Phagosome; Gap junction                                                                                                                                                                                                                                         | 97.8       | 98.2  | 95.8  | 96.2  | 100    | 102.9 | 105.8  | 104.9 |
| 304376297 | Ankrd44            | 993   | 107.3    |                                                                                                                                                                                                                                                                 | 105.5      | 103.8 | 111.8 | 105.9 | 91.9   | 87.7  | 87.6   | 89.1  |
| 126157504 | Srrm2              | 2607  | 283.4    |                                                                                                                                                                                                                                                                 | 104.3      | 101   | 101.3 | 94.7  | 100.3  | 102.7 | 102.2  | 104.8 |
| 121949760 | Tmpo               | 693   | 75.1     |                                                                                                                                                                                                                                                                 | 102.5      | 101.9 | 103.1 | 101.9 | 90.3   | 92.2  | 94.6   | 96.2  |
| 22094123  | Supt5;<br>Supt5h   | 1082  | 120.6    |                                                                                                                                                                                                                                                                 | 107.1      | 107.3 | 101.9 | 102.5 | 94.8   | 93.7  | 98.2   | 97.6  |
| 34610207  | Aars               | 968   | 106.8    | Aminoacyl-tRNA biosynthesis                                                                                                                                                                                                                                     | 71.4       | 75.6  | 64.2  | 65.5  | 131.6  | 131.1 | 137.1  | 135   |
| 112293264 | Pdia3              | 505   | 56.6     | Antigen processing and presentation; Protein processing in endoplasmic reticulum                                                                                                                                                                                | 93.3       | 90.8  | 92.7  | 92.8  | 107.3  | 107.8 | 98.9   | 101.9 |
| 124001574 | Gtf2i              | 998   | 112.2    | Herpes simplex infection; Basal transcription factors; cGMP-PKG signaling pathway                                                                                                                                                                               | 101.1      | 103.7 | 97.5  | 96.3  | 107.2  | 107.3 | 98.5   | 103.3 |
| 236466498 | Uggt1              | 1551  | 176.3    | Protein processing in endoplasmic reticulum                                                                                                                                                                                                                     | 102        | 101.6 | 96.5  | 97.6  | 98.5   | 98.4  | 88.7   | 91.2  |
| 34996495  | Rpn2               | 631   | 69       | Metabolic pathways; N-Glycan biosynthesis; Protein processing in endoplasmic reticulum                                                                                                                                                                          | 86.8       | 86.4  | 82.1  | 82.1  | 119.5  | 120.2 | 112.2  | 109.1 |



|           |                  |      |       |                                                                                                                                                                                                                                                                |       |       |       |       |       |       |       |       |
|-----------|------------------|------|-------|----------------------------------------------------------------------------------------------------------------------------------------------------------------------------------------------------------------------------------------------------------------|-------|-------|-------|-------|-------|-------|-------|-------|
| 359751391 | Dnm2             | 870  | 98.1  | Endocytosis; Phospholipase D signaling pathway; Endocrine and other factor-regulated calcium reabsorption; Fc gamma R-mediated phagocytosis; Synaptic vesicle cycle; Bacterial invasion of epithelial cells                                                    | 108.9 | 110.5 | 108.7 | 109.6 | 90.8  | 93.3  | 87.6  | 86.8  |
| 146231985 | Acin1            | 1338 | 150.6 | mRNA surveillance pathway; Spliceosome; RNA transport                                                                                                                                                                                                          | 97.8  | 101.4 | 97.8  | 99.4  | 99.5  | 96.5  | 101.4 | 96.3  |
| 8394027   | Ppp2r1a          | 589  | 65.3  | mRNA surveillance pathway; Chagas disease (American trypanosomiasis); Dopaminergic synapse; Hippo signaling pathway; Oocyte meiosis; Sphingolipid signaling pathway; Long-term depression; TGF-beta signaling pathway; Hepatitis C; PI3K-Akt signaling pathway | 100.3 | 99.8  | 95.5  | 94.7  | 96.4  | 93.8  | 94    | 94.4  |
| 114326446 | Myh9             | 1960 | 226.2 | Regulation of actin cytoskeleton; Tight junction                                                                                                                                                                                                               | 94.6  | 95.1  | 95.4  | 95.8  | 94.9  | 95.2  | 101.3 | 101   |
| 227116327 | Tln1             | 2541 | 269.7 | Focal adhesion; Platelet activation; HTLV-I infection; Rap1 signaling pathway                                                                                                                                                                                  | 107.1 | 109.5 | 106.2 | 106.4 | 93.3  | 92.4  | 90.9  | 91.1  |
| 115496850 | Spna2;<br>Sptan1 | 2478 | 285.2 |                                                                                                                                                                                                                                                                | 115.4 | 114.6 | 106.3 | 108.1 | 85    | 84.6  | 85.4  | 84.3  |
| 125347376 | Flna             | 2639 | 280.3 |                                                                                                                                                                                                                                                                | 107.9 | 108.5 | 108.2 | 109.3 | 85.6  | 86.4  | 90.5  | 89.8  |
| 134288917 | Dync1h1          | 4644 | 531.7 | Phagosome; Salmonella infection; Vasopressin-regulated water reabsorption                                                                                                                                                                                      | 102.7 | 104.1 | 101.2 | 101.6 | 99    | 98.7  | 93.8  | 94.8  |
| 117938332 | Spnb2;<br>Sptbn1 | 2363 | 274.1 | Tight junction                                                                                                                                                                                                                                                 | 112.5 | 114.4 | 107.7 | 107.5 | 85.4  | 84.9  | 81.4  | 83.6  |
| 254675300 | Numa1            | 2094 | 235.5 |                                                                                                                                                                                                                                                                | 107.1 | 108.2 | 108.6 | 107.1 | 91.4  | 89.3  | 92.8  | 92.6  |
| 254675115 | Plec             | 4691 | 533.9 |                                                                                                                                                                                                                                                                | 110.1 | 109.7 | 102.4 | 102.7 | 93.8  | 90.8  | 92.1  | 92.4  |
| 270309140 | Tpr              | 2431 | 273.8 | Pathways in cancer; Thyroid cancer; RNA transport                                                                                                                                                                                                              | 97.4  | 97.7  | 95.1  | 93.9  | 104.1 | 104.9 | 104.9 | 105   |
| 242332572 | Iqgap1           | 1657 | 188.6 | Regulation of actin cytoskeleton; Adherens junction; Proteoglycans in cancer                                                                                                                                                                                   | 111.2 | 110.7 | 104.7 | 104.1 | 91.1  | 91.2  | 90.2  | 89.2  |
| 40018610  | Snrrp200         | 2136 | 244.4 | Spliceosome                                                                                                                                                                                                                                                    | 96.7  | 96.3  | 97    | 95.9  | 105   | 106.7 | 97.3  | 99    |
| 51491845  | Cltc             | 1675 | 191.4 | Endocytosis; Endocrine and other factor-regulated calcium reabsorption; Lysosome; Huntington's disease; Synaptic vesicle cycle; Bacterial invasion of epithelial cells                                                                                         | 96.8  | 95.4  | 94.4  | 93.3  | 103.3 | 106.3 | 95.2  | 94.9  |
| 183396771 | Hspd1            | 573  | 60.9  | RNA degradation; Tuberculosis; Legionellosis; Type 1 diabetes mellitus                                                                                                                                                                                         | 78.7  | 74.7  | 86.5  | 88.4  | 133.9 | 136.7 | 125   | 122   |
| 115583687 | Prpf8            | 2335 | 273.4 | Spliceosome                                                                                                                                                                                                                                                    | 95.3  | 95.6  | 96.4  | 96.2  | 106   | 105.9 | 100.8 | 100.5 |
| 61097906  | Actn1            | 892  | 103   | Leukocyte transendothelial migration; Regulation of actin cytoskeleton; Arrhythmogenic right ventricular cardiomyopathy (ARVC); Focal adhesion; Adherens junction; Tight junction; Systemic lupus erythematosus; Amoebiasis; Viral carcinogenesis              | 107.1 | 104.7 | 116.9 | 116.2 | 85.4  | 90.3  | 83.5  | 84.7  |
| 34328148  | Top2b            | 1612 | 181.8 | Platinum drug resistance                                                                                                                                                                                                                                       | 96.4  | 96.6  | 97.2  | 97    | 97.9  | 98.2  | 91.4  | 90.9  |
| 11230802  | Actn4            | 912  | 104.9 | Leukocyte transendothelial migration; Regulation of actin cytoskeleton; Arrhythmogenic right ventricular cardiomyopathy (ARVC); Focal adhesion; Adherens junction; Tight junction; Systemic lupus erythematosus; Amoebiasis; Viral carcinogenesis              | 101.9 | 101.7 | 103.4 | 104.5 | 96.1  | 96.5  | 95    | 96.9  |
| 194306547 | Arhgef1          | 979  | 109.2 |                                                                                                                                                                                                                                                                | 118.3 | 118.6 | 106.1 | 102.7 | 90.3  | 89.3  | 82.9  | 87.9  |
| 21313308  | Hnrmpm           | 729  | 77.6  | Spliceosome                                                                                                                                                                                                                                                    | 94    | 92.7  | 105.5 | 108.5 | 103   | 104.3 | 94.2  | 92.7  |

|           |          |      |       |                                                                                                                                                                                                                                                                 |       |       |       |       |       |       |       |       |
|-----------|----------|------|-------|-----------------------------------------------------------------------------------------------------------------------------------------------------------------------------------------------------------------------------------------------------------------|-------|-------|-------|-------|-------|-------|-------|-------|
| 21450277  | Atp1a1   | 1023 | 112.9 | Pancreatic secretion; Carbohydrate digestion and absorption; Mineral absorption; Protein digestion and absorption; Endocrine and other factor-regulated calcium reabsorption; Thyroid hormone synthesis; Thyroid hormone signaling pathway; Proximal tubule bic | 83    | 81.9  | 81.4  | 80.6  | 114.8 | 117.3 | 116.7 | 117.4 |
| 6680748   | Atp5a1   | 553  | 59.7  | Metabolic pathways; Huntington's disease; Oxidative phosphorylation; Parkinson's disease; Alzheimer's disease                                                                                                                                                   | 99.6  | 98.3  | 96.7  | 96.2  | 106   | 105.8 | 105.5 | 104   |
| 31980648  | Atp5b    | 529  | 56.3  | Metabolic pathways; Huntington's disease; Oxidative phosphorylation; Parkinson's disease; Alzheimer's disease                                                                                                                                                   | 94.3  | 93.6  | 95.9  | 96.8  | 106   | 106.8 | 101.1 | 101.3 |
| 150456419 | Dhx9     | 1383 | 149.5 |                                                                                                                                                                                                                                                                 | 98.7  | 98.9  | 96.2  | 96.9  | 103.1 | 104.7 | 93.7  | 93.5  |
| 350606354 | Lcp1     | 627  | 70.1  |                                                                                                                                                                                                                                                                 | 101.4 | 101.7 | 100.2 | 99.6  | 96.7  | 95    | 92.9  | 93.6  |
| 312433955 | Macf1    | 7355 | 831.4 |                                                                                                                                                                                                                                                                 | 100.7 | 102.5 | 99.1  | 98.1  | 101.6 | 100.4 | 103.2 | 103.6 |
| 31981562  | Pkm      | 531  | 57.8  | Pyruvate metabolism; Type II diabetes mellitus; Metabolic pathways; Biosynthesis of amino acids; Purine metabolism; Glycolysis / Gluconeogenesis; Carbon metabolism; Central carbon metabolism in cancer; Glucagon signaling pathway; Viral carcinogenesis      | 87.8  | 103.3 | 90.6  | 72.8  | 105.9 | 94.1  | 104.7 | 97.1  |
| 31981302  | Anxa6    | 673  | 75.8  |                                                                                                                                                                                                                                                                 | 111.7 | 111.3 | 123.6 | 123.5 | 69.5  | 71.6  | 81.7  | 79    |
| 70778915  | Msn      | 577  | 67.7  | Leukocyte transendothelial migration; Regulation of actin cytoskeleton; Proteoglycans in cancer; Measles                                                                                                                                                        | 110.7 | 109.5 | 114.8 | 114   | 87.5  | 88    | 92    | 92.7  |
| 444189294 | Uba1     | 1118 | 124.2 |                                                                                                                                                                                                                                                                 | 99.7  | 99    | 96.4  | 96    | 96.7  | 98.4  | 100.3 | 100.1 |
| 359807367 | Pkm      | 531  | 57.9  | Pyruvate metabolism; Type II diabetes mellitus; Metabolic pathways; Biosynthesis of amino acids; Purine metabolism; Glycolysis / Gluconeogenesis; Carbon metabolism; Central carbon metabolism in cancer; Glucagon signaling pathway; Viral carcinogenesis      | 96.3  | 87.4  | 98.5  | 90    | 104.2 | 106.2 | 102.7 | 106.8 |
| 31982724  | Mybbp1a  | 1344 | 151.9 |                                                                                                                                                                                                                                                                 | 84    | 80.7  | 79.6  | 79.9  | 120.6 | 122.2 | 124.6 | 128.6 |
| 188219589 | Lmnbl    | 588  | 66.7  | Apoptosis                                                                                                                                                                                                                                                       | 115.2 | 110   | 110   | 113.3 | 80.3  | 82.7  | 87.6  | 87    |
| 52138550  | Il16     | 1322 | 141.3 |                                                                                                                                                                                                                                                                 | 118   | 119.2 | 113.3 | 115.3 | 82.2  | 78.5  | 81.2  | 81.6  |
| 225543319 | Vcp      | 806  | 89.3  | Legionellosis; Protein processing in endoplasmic reticulum                                                                                                                                                                                                      | 94.1  | 92.8  | 90.5  | 89.4  | 108.5 | 107.6 | 107.9 | 109.2 |
| 158966670 | Anxa6    | 667  | 75.2  |                                                                                                                                                                                                                                                                 | 112   | 111.8 | 120.5 | 121.2 | 78.3  | 77.3  | 80.7  | 80.7  |
| 126521835 | Cct2     | 535  | 57.4  |                                                                                                                                                                                                                                                                 | 89.9  | 89.8  | 89.9  | 88.6  | 113.2 | 115.7 | 110.6 | 108.4 |
| 312176443 | Tcofl    | 1356 | 138.5 |                                                                                                                                                                                                                                                                 | 101.8 | 99.4  | 100.6 | 98.1  | 91.1  | 93.1  | 104.5 | 105.1 |
| 33859650  | Esyt1    | 1092 | 121.5 |                                                                                                                                                                                                                                                                 | 109.4 | 110.3 | 106.7 | 106   | 95.5  | 94.1  | 84.5  | 83.9  |
| 93102409  | Fasn     | 2504 | 272.3 | Fatty acid metabolism; Insulin signaling pathway; Metabolic pathways; AMPK signaling pathway; Fatty acid                                                                                                                                                        | 81.9  | 83.7  | 80.5  | 80    | 120.4 | 118.7 | 110   | 112.2 |
| 112807186 | Gcn1l1   | 2671 | 292.8 |                                                                                                                                                                                                                                                                 | 88.8  | 89.2  | 88.9  | 86.1  | 114.9 | 115.2 | 110.8 | 112.1 |
| 40556608  | Hsp90ab1 | 724  | 83.2  | Progesterone-mediated oocyte maturation; NOD-like receptor signaling pathway; Pathways in cancer; Antigen processing and presentation; PI3K-Akt signaling pathway; Protein processing in endoplasmic reticulum; Estrogen signaling pathway; Prostate cancer     | 76.2  | 75.2  | 81.9  | 79.7  | 120.3 | 123.2 | 118.7 | 118   |

|           |                            |      |       |                                                                                                                                                                                                                                                                 |       |       |       |       |       |       |       |       |
|-----------|----------------------------|------|-------|-----------------------------------------------------------------------------------------------------------------------------------------------------------------------------------------------------------------------------------------------------------------|-------|-------|-------|-------|-------|-------|-------|-------|
| 328887935 | Stat1                      | 755  | 88    | AGE-RAGE signaling pathway in diabetic complications; Herpes simplex infection; Prolactin signaling pathway; NOD-like receptor signaling pathway; Jak-STAT signaling pathway; Toxoplasmosis; Chemokine signaling pathway; Tuberculosis; Hepatitis B; Osteoclast | 93    | 91.8  | 94.8  | 96.7  | 110.6 | 111.1 | 107.1 | 106.1 |
| 36031035  | Smc3                       | 1217 | 141.5 | Oocyte meiosis; Cell cycle                                                                                                                                                                                                                                      | 101.6 | 101.1 | 101.6 | 101.7 | 98.1  | 98.5  | 93    | 94.9  |
| 61743961  | Ahnak                      | 5656 | 603.9 |                                                                                                                                                                                                                                                                 | 133.3 | 130.7 | 106.5 | 107.5 | 80    | 81.9  | 85.9  | 83.6  |
| 117553625 | Dock2                      | 1828 | 211.6 | Chemokine signaling pathway; Fc gamma R-mediated phagocytosis                                                                                                                                                                                                   | 107.1 | 104.7 | 103.1 | 104   | 92.7  | 89.1  | 88.7  | 88.8  |
| 309266230 | LOC100047252; LOC102641810 | 370  | 40.5  |                                                                                                                                                                                                                                                                 | 58.1  | 50.6  | 57.1  | 51.5  | 154.4 | 160.4 | 154.6 | 163.7 |
| 113205059 | Ybx1                       | 322  | 35.7  |                                                                                                                                                                                                                                                                 | 86.3  | 81.4  | 79.1  | 77.3  | 131   | 134.1 | 133.2 | 123.9 |
| 27370240  | Lnpep                      | 1025 | 117.2 | Renin-angiotensin system                                                                                                                                                                                                                                        | 97.3  | 101.1 | 95.2  | 95.9  | 96    | 99.6  | 98.9  | 100.4 |
| 170784813 | Upf1                       | 1124 | 123.9 | mRNA surveillance pathway; RNA transport                                                                                                                                                                                                                        | 85.3  | 87.5  | 90.5  | 88.4  | 114.2 | 114.1 | 114.1 | 113.3 |
| 23943795  | Nckap11                    | 1134 | 128.8 | Regulation of actin cytoskeleton                                                                                                                                                                                                                                | 99.7  | 94.5  | 100.2 | 102.6 | 97.3  | 103.7 | 94.6  | 94.7  |
| 239051067 | Cul5                       | 855  | 99    |                                                                                                                                                                                                                                                                 | 95.2  | 96    | 97.4  | 96.6  | 99.9  | 101.5 | 100.6 | 97.7  |
| 22122515  | Ahsa1                      | 338  | 38.1  |                                                                                                                                                                                                                                                                 | 96.6  | 97.9  | 93.8  | 93.4  | 105.4 | 103.3 | 96.5  | 100.9 |
| 29789351  | Nup107                     | 926  | 106.7 | RNA transport                                                                                                                                                                                                                                                   | 93.9  | 97    | 93.7  | 95.2  | 111.1 | 115.8 | 100.9 | 101.8 |
| 31981269  | Glrx3                      | 337  | 37.8  |                                                                                                                                                                                                                                                                 | 93.5  | 89.7  | 92.1  | 88.6  | 104.8 | 110.1 | 116.9 | 116.5 |
| 31981690  | Hspa8                      | 646  | 70.8  | Endocytosis; MAPK signaling pathway; Toxoplasmosis; Epstein-Barr virus infection; Spliceosome; Legionellosis; Influenza A; Antigen processing and presentation; Protein processing in endoplasmic reticulum; Estrogen signaling pathway; Measles; Longevity reg | 88.6  | 87.8  | 89.1  | 87.6  | 106.9 | 105.2 | 113.3 | 116.1 |
| 72384374  | Ddx21                      | 851  | 93.5  |                                                                                                                                                                                                                                                                 | 79.8  | 79.4  | 86.7  | 87.7  | 126.7 | 125.7 | 123   | 121.6 |
| 39204553  | Chd4                       | 1915 | 217.6 | Viral carcinogenesis                                                                                                                                                                                                                                            | 92.2  | 91.6  | 93.3  | 94.6  | 108.9 | 107.6 | 106   | 108.4 |
| 51093867  | Cad                        | 2225 | 243.1 | Metabolic pathways; Pyrimidine metabolism; Alanine, aspartate and glutamate metabolism                                                                                                                                                                          | 85.6  | 87.5  | 80.1  | 79.2  | 126.2 | 126.6 | 117.4 | 122.8 |
| 6753324   | Cct6a                      | 531  | 58    |                                                                                                                                                                                                                                                                 | 89.4  | 89    | 90.4  | 89.2  | 109.3 | 108.5 | 113.3 | 114.7 |
| 6755594   | Eftud2                     | 971  | 109.3 | Spliceosome                                                                                                                                                                                                                                                     | 92.9  |       | 92.9  |       | 105   |       | 106.4 |       |
| 126090932 | Nop56                      | 580  | 64.4  | Ribosome biogenesis in eukaryotes                                                                                                                                                                                                                               | 98.8  | 99.6  | 95.6  | 98.4  | 101.4 | 102.4 | 100.3 | 97    |
| 7106439   | Tubb5                      | 444  | 49.6  | Phagosome; Gap junction                                                                                                                                                                                                                                         | 86.4  | 85.9  | 84.5  | 84.3  | 116.3 | 115.9 | 107.5 | 107.2 |
| 170295840 | Trim28                     | 834  | 88.8  |                                                                                                                                                                                                                                                                 | 101.9 | 99.8  | 98.2  | 98.7  | 99.4  | 96.7  | 94    | 92.8  |
| 6754254   | Hsp90aa1                   | 733  | 84.7  | Progesterone-mediated oocyte maturation; NOD-like receptor signaling pathway; Pathways in cancer; Antigen processing and presentation; PI3K-Akt signaling pathway; Protein processing in endoplasmic reticulum; Estrogen signaling pathway; Prostate cancer     | 84.7  | 84.1  | 91.1  | 91.3  | 116.5 | 119   | 101.1 | 103.3 |

|           |                                                                       |      |       |                                                                                                                                                                                                                                                                             |       |       |       |       |       |       |       |       |
|-----------|-----------------------------------------------------------------------|------|-------|-----------------------------------------------------------------------------------------------------------------------------------------------------------------------------------------------------------------------------------------------------------------------------|-------|-------|-------|-------|-------|-------|-------|-------|
| 149273202 | Gapdh;<br>Gm20899;<br>LOC1000<br>42025;<br>Gapdh-<br>ps15;<br>Gm12033 | 333  | 35.8  | Metabolic pathways; Biosynthesis of amino acids;<br>Glycolysis / Gluconeogenesis; HIF-1 signaling pathway;<br>Alzheimer's disease; Carbon metabolism                                                                                                                        | 98    | 95.4  | 97.7  | 99.2  | 92.2  | 92.4  | 97.5  | 96.6  |
| 309272601 | Rnf213                                                                | 5223 | 592.1 |                                                                                                                                                                                                                                                                             | 106.4 | 108.6 | 103.7 | 102.4 | 92.5  | 91    | 81.2  | 85    |
| 145966915 | Flnb                                                                  | 2591 | 276.4 |                                                                                                                                                                                                                                                                             | 99.9  | 97.2  | 98.5  | 100.4 | 99.2  | 100.9 | 99.9  | 100.2 |
| 254540168 | Hspa5                                                                 | 655  | 72.4  | Thyroid hormone synthesis; Antigen processing and<br>presentation; Protein export; Prion diseases; Protein<br>processing in endoplasmic reticulum                                                                                                                           | 70.6  | 73    | 68.6  | 68.8  | 127.7 | 127.7 | 132   | 130.7 |
| 157951706 | Hyou1                                                                 | 999  | 111.1 | Protein processing in endoplasmic reticulum                                                                                                                                                                                                                                 | 84.3  | 85.4  | 80.6  | 79.6  | 114   | 113.2 | 118.4 | 118.8 |
| 153792534 | Ranbp2                                                                | 3053 | 340.9 | RNA transport                                                                                                                                                                                                                                                               | 97    | 95.8  | 98.5  | 97.4  | 104.8 | 103.9 | 99.7  | 101.9 |
| 227908823 | Atic                                                                  | 592  | 64.2  | Metabolic pathways; Purine metabolism; Antifolate<br>resistance; One carbon pool by folate                                                                                                                                                                                  | 101.6 | 102.8 | 105.6 | 104.2 | 96.5  | 95.8  | 94.4  | 92.1  |
| 116734870 | Lta4h                                                                 | 611  | 69    | Metabolic pathways; Arachidonic acid metabolism                                                                                                                                                                                                                             | 118.7 | 118.8 | 112.5 | 113.7 | 81.6  | 80.6  | 85.6  | 82.5  |
| 162461907 | Hspa9                                                                 | 679  | 73.4  | RNA degradation; Tuberculosis                                                                                                                                                                                                                                               | 84.5  | 85.7  | 83.6  | 82.1  | 119.1 | 119.8 | 126.3 | 128.9 |
| 33859811  | Hadha                                                                 | 763  | 82.6  | Fatty acid metabolism; Tryptophan metabolism; Valine,<br>leucine and isoleucine degradation; Metabolic pathways;<br>Lysine degradation; Fatty acid degradation; Butanoate<br>metabolism; beta-Alanine metabolism; Propanoate<br>metabolism; Fatty acid elongation; Carbon m | 103.3 | 106.4 | 114.2 | 109.5 | 94.8  | 91.1  | 83.6  | 84.1  |
| 31982755  | Vim                                                                   | 466  | 53.7  | MicroRNAs in cancer; Epstein-Barr virus infection                                                                                                                                                                                                                           | 123.7 | 126.6 | 116   | 118.4 | 67.7  | 64.8  | 72.9  | 68    |
| 6753320   | Cct3                                                                  | 545  | 60.6  |                                                                                                                                                                                                                                                                             | 93.5  | 91.5  | 90    | 92    | 108.1 | 107   | 104   | 104.8 |
| 70794816  | Eno1;<br>Gm5506;<br>Eno1b                                             | 434  | 47.1  | RNA degradation; Metabolic pathways; Biosynthesis of<br>amino acids; Glycolysis / Gluconeogenesis; HIF-1 signaling<br>pathway; Carbon metabolism                                                                                                                            | 99.7  | 101.6 | 104.6 | 105.9 | 87.1  | 87.9  | 97.6  | 95.7  |
| 12328814  | Stk4                                                                  | 487  | 55.5  | FoxO signaling pathway; MAPK signaling pathway; Ras<br>signaling pathway; Non-small cell lung cancer; Pathways in<br>cancer                                                                                                                                                 | 111.6 | 111.2 | 114.8 | 112.6 | 81    | 80.7  | 85.7  | 83.5  |
| 6671702   | Cct5                                                                  | 541  | 59.6  |                                                                                                                                                                                                                                                                             | 91.1  | 90.3  | 95.1  | 93.7  | 109.3 | 110.8 | 106.8 | 109   |
| 40254595  | Dpysl2                                                                | 572  | 62.2  | Axon guidance                                                                                                                                                                                                                                                               | 100   | 98.6  | 100.2 | 99.8  | 90.9  | 91.9  | 97.5  | 99.2  |
| 6671509   | Actb                                                                  | 375  | 41.7  | Oxytocin signaling pathway; Leukocyte transendothelial<br>migration; Hypertrophic cardiomyopathy (HCM);<br>Regulation of actin cytoskeleton; Arrhythmogenic right<br>ventricular cardiomyopathy (ARVC); Focal adhesion;<br>Hippo signaling pathway; Platelet activation; Di | 105.2 | 106   | 112.6 | 114   | 84.4  | 82.3  | 84    | 83.6  |
| 6752954   | Actg1                                                                 | 375  | 41.8  | Oxytocin signaling pathway; Leukocyte transendothelial<br>migration; Hypertrophic cardiomyopathy (HCM);<br>Regulation of actin cytoskeleton; Arrhythmogenic right<br>ventricular cardiomyopathy (ARVC); Focal adhesion;<br>Hippo signaling pathway; Platelet activation; Di | 101.2 | 101.4 | 107.3 | 102.2 | 94.9  | 96.1  | 98.8  | 104.3 |
| 134031976 | Lrpprc                                                                | 1392 | 156.5 |                                                                                                                                                                                                                                                                             | 93.9  | 93.4  | 91.4  | 95.5  | 117.7 | 119   | 105.5 | 104.7 |

|           |                   |      |       |                                                                                                                                                                                                                 |       |       |       |       |       |       |       |       |
|-----------|-------------------|------|-------|-----------------------------------------------------------------------------------------------------------------------------------------------------------------------------------------------------------------|-------|-------|-------|-------|-------|-------|-------|-------|
| 255069795 | Vars              | 1263 | 140.1 | Aminoacyl-tRNA biosynthesis                                                                                                                                                                                     | 98.2  | 99.3  | 90.3  | 89.4  | 111.4 | 115   | 110.2 | 109.4 |
| 31542159  | Atp2a3            | 1038 | 113.6 | Pancreatic secretion; cGMP-PKG signaling pathway; Calcium signaling pathway; Alzheimer's disease                                                                                                                | 114.4 | 112.9 | 106.2 | 106.3 | 89.5  | 90.2  | 76.4  | 81.8  |
| 408357996 | Lsp1              | 330  | 36.7  | Tuberculosis                                                                                                                                                                                                    | 114.5 | 112.9 | 109.5 | 112   | 83.8  | 82.2  | 91.6  | 91.3  |
| 126723461 | Cct8              | 548  | 59.5  |                                                                                                                                                                                                                 | 89.3  | 90.1  | 88.6  | 89.3  | 109.2 | 107.2 | 115.6 | 114.4 |
| 9845257   | Hist1h1c          | 212  | 21.3  |                                                                                                                                                                                                                 | 96.4  | 97.3  | 126.7 | 136   | 84.4  | 80.5  | 88.9  | 85.5  |
| 6753322   | Cct4              | 539  | 58    |                                                                                                                                                                                                                 | 91.2  | 93.2  | 91.9  | 92.3  | 110.3 | 110.6 | 107.8 | 107.2 |
| 84875537  | Ncl               | 707  | 76.7  |                                                                                                                                                                                                                 | 82    | 82.7  | 90.1  | 90.8  | 111   | 109.5 | 128.3 | 126   |
| 293597567 | Aldoa             | 418  | 45.1  |                                                                                                                                                                                                                 | 87.7  | 87.4  | 91    | 89.1  | 113.8 | 118.1 | 109.6 | 111.6 |
| 54607128  | Pdcd11            | 1862 | 207.6 |                                                                                                                                                                                                                 | 89    | 86.7  | 81.7  | 82.5  | 122.1 | 125.3 | 116.3 | 119.6 |
| 22203755  | Eif3c             | 911  | 105.5 | RNA transport                                                                                                                                                                                                   | 85.2  | 85.9  | 86    | 88    | 118.7 | 117   | 110.9 | 116.8 |
| 124358955 | Son               | 2444 | 265.5 |                                                                                                                                                                                                                 | 99.2  | 103.6 | 95.1  | 98.2  | 100.1 | 101.2 | 104.7 | 103.9 |
| 27151744  | Sh3kbp1           | 628  | 68.8  |                                                                                                                                                                                                                 | 106   | 106.2 | 117.4 | 118.1 | 82.7  | 80.5  | 84    | 84.7  |
| 70778976  | Pgk1              | 417  | 44.5  | Metabolic pathways; Biosynthesis of amino acids; Glycolysis / Gluconeogenesis; HIF-1 signaling pathway; Carbon metabolism                                                                                       | 80.7  | 80.1  | 85.7  | 85.8  | 111   | 112.9 | 116   | 115.9 |
| 153791358 | Sf3b1             | 1304 | 145.7 | Spliceosome                                                                                                                                                                                                     | 100.9 | 100   | 101.3 | 101.5 | 99.1  | 98    | 97.4  | 99.3  |
| 13928670  | Vps35             | 796  | 91.7  | Endocytosis                                                                                                                                                                                                     | 99.3  | 100.5 | 98.2  | 101.6 | 102.3 | 100.5 | 83.2  | 85.2  |
| 254540089 | Prpsap1           | 385  | 42.4  |                                                                                                                                                                                                                 | 105.9 | 103.3 | 103.3 | 98.7  | 93.3  | 92.1  | 89.1  | 85.8  |
| 158966689 | Nop2              | 794  | 86.9  |                                                                                                                                                                                                                 | 86.4  | 85.9  | 80.5  | 79.7  | 121.7 | 119.6 | 126.8 | 127.8 |
| 226443414 | Kbtbd11           | 633  | 67.9  |                                                                                                                                                                                                                 | 118.4 | 116.6 | 108   | 107.2 | 84.7  | 85.2  | 84.3  | 84.6  |
| 257796245 | Dlat              | 642  | 67.9  | Pyruvate metabolism; Citrate cycle (TCA cycle); Metabolic pathways; Glycolysis / Gluconeogenesis; Carbon                                                                                                        | 103.6 | 101.9 | 100.3 | 98.7  | 101   | 98.9  | 102.5 | 104.5 |
| 22726191  | Ubqln1            | 554  | 58.6  |                                                                                                                                                                                                                 | 106.3 | 105   | 77.6  | 95.7  | 95.1  | 108.8 | 118   | 108.4 |
| 118403314 | Rbm39             | 530  | 59.4  |                                                                                                                                                                                                                 | 94.4  | 92.7  | 100.5 | 98.8  | 103.3 | 102.6 | 104   | 107.1 |
| 30794476  | Prkar1a           | 381  | 43.2  | Insulin signaling pathway                                                                                                                                                                                       | 105.7 | 106.6 | 103.7 | 102.5 | 87.6  | 84.4  | 91    | 90.8  |
| 21426823  | Hist1h1a          | 213  | 21.8  |                                                                                                                                                                                                                 | 90.7  | 93.9  | 120.6 | 116.6 | 81    | 84.1  | 85.6  | 86.8  |
| 226423871 | Dbnl              | 436  | 48.7  |                                                                                                                                                                                                                 | 107.1 | 107.5 | 114.2 | 107.1 | 85.2  | 83.2  | 91    | 87.7  |
| 213688428 | Nmi               | 314  | 35.2  |                                                                                                                                                                                                                 | 104.8 | 106.4 | 102.3 | 99.7  | 90.4  | 91.1  | 92.1  | 93.6  |
| 247494234 | Dnajc13           | 2243 | 254.3 |                                                                                                                                                                                                                 | 96.8  | 100.3 | 96.3  | 96.2  | 102.1 | 104.6 | 101   | 97.8  |
| 153791789 | Srp54a;<br>Srp54b | 504  | 55.7  | Protein export                                                                                                                                                                                                  | 94.3  | 96.4  | 94.2  | 93.6  | 108.6 | 103   | 103.9 | 103   |
| 241982789 | Ptk2b             | 1009 | 115.7 | Leukocyte transendothelial migration; Phospholipase D signaling pathway; Chemokine signaling pathway; Hepatitis B; Calcium signaling pathway; GnRH signaling pathway; Natural killer cell mediated cytotoxicity | 96.3  | 94.5  | 99.6  | 101.6 | 93.1  | 96.2  | 100   | 102.1 |
| 9845253   | Hnrnp2            | 449  | 49.2  |                                                                                                                                                                                                                 | 100.6 | 100.5 | 98.2  | 99.9  | 85.5  | 91.7  | 83    | 89.5  |
| 262118273 | Rars              | 660  | 75.6  | Aminoacyl-tRNA biosynthesis                                                                                                                                                                                     | 89.1  | 87.6  | 88.4  | 91.1  | 109.6 | 111.2 | 107.9 | 108.3 |
| 21450287  | Csde1             | 798  | 88.7  |                                                                                                                                                                                                                 | 75.6  | 73.9  | 78.4  | 77.7  | 126.8 | 130.4 | 127.6 | 126.7 |
| 227430367 | Smu1              | 513  | 57.5  |                                                                                                                                                                                                                 | 102.6 | 101.1 | 93.2  | 92    | 110.8 | 110.9 | 98.1  | 97.4  |
| 189181672 | Akap13            | 2776 | 303.8 |                                                                                                                                                                                                                 | 106.1 | 106.1 | 104.1 | 107.3 | 89.1  | 87    | 95.8  | 94    |

|           |                    |      |       |                                                                                                                                                                     |       |       |       |       |       |       |       |       |
|-----------|--------------------|------|-------|---------------------------------------------------------------------------------------------------------------------------------------------------------------------|-------|-------|-------|-------|-------|-------|-------|-------|
| 172073152 | Nup210             | 1886 | 204   | RNA transport                                                                                                                                                       | 101.7 | 99.5  | 94.4  | 95.1  | 99.6  | 98.6  | 97.3  | 93    |
| 283945575 | H2afy              | 369  | 39.3  |                                                                                                                                                                     | 116.5 | 132.1 | 128.9 | 137.5 | 75.8  | 73.8  | 94.1  | 76.6  |
| 283135118 | Mthfd1l            | 977  | 105.7 | Metabolic pathways; One carbon pool by folate                                                                                                                       | 97.4  | 95.7  | 93.8  | 93.6  | 108.4 | 111.1 | 111.3 | 110.4 |
| 112293273 | Mem5               | 734  | 82.4  | DNA replication; Cell cycle                                                                                                                                         | 73.2  | 71.5  | 72.7  | 71.8  | 127   | 130.4 | 126.1 | 127   |
| 19527174  | Sf3b3              | 1217 | 135.5 | Spliceosome                                                                                                                                                         | 99    | 99.2  | 97.6  | 97.6  | 99.6  | 98.7  | 102.3 | 100.8 |
| 163954948 | Khsrp              | 748  | 76.7  |                                                                                                                                                                     | 100.5 | 101.5 | 107.7 | 107.6 | 100.4 | 98.2  | 93.8  | 97.1  |
| 23821025  | Clip1              | 1391 | 155.7 | mTOR signaling pathway                                                                                                                                              | 102.6 | 104.5 | 103   | 102.4 | 97    | 96.6  | 101.9 | 101.7 |
| 21746161  | Tubb2b             | 445  | 49.9  | Phagosome; Gap junction                                                                                                                                             | 90.1  | 92.6  | 85.6  | 85.4  | 100.6 | 99    | 110.2 | 109.8 |
| 41152517  | H2afy              | 372  | 39.7  | Alcoholism; Systemic lupus erythematosus                                                                                                                            | 113   | 111.5 | 125.2 | 125.4 | 82.4  | 82.2  | 85.1  | 85.9  |
| 218156343 | Hmha1;<br>Arhgap45 | 1116 | 122.8 |                                                                                                                                                                     | 106.1 | 104.2 | 111.5 | 110.6 | 88.3  | 88.7  | 89.2  | 89.7  |
| 148839318 | Smchd1             | 2007 | 225.5 |                                                                                                                                                                     | 96.7  | 96.6  | 97.9  | 98.1  | 102.6 | 102.3 | 99.5  | 100.7 |
| 124486765 | Pds5a              | 1332 | 150.1 |                                                                                                                                                                     | 101.6 | 99.8  | 98.2  | 99.4  | 101.3 | 99.8  | 98.7  | 100.3 |
| 410991938 | Ifi47              | 420  | 46.8  | TNF signaling pathway                                                                                                                                               | 97.9  | 96.7  | 98.1  | 98.9  | 101.2 | 103.3 | 102   | 103   |
| 146219837 | Eif3a              | 1344 | 161.8 | RNA transport                                                                                                                                                       | 90.3  | 88.1  | 90.5  | 93.6  | 111   | 110   | 112   | 112.1 |
| 258613892 | Smc1a              | 1233 | 143.1 | Oocyte meiosis; Cell cycle                                                                                                                                          | 99.1  | 99.9  | 99.7  | 99.7  | 98.6  | 95.8  | 99.2  | 103.1 |
| 254588110 | Hist1h1d           | 221  | 22.1  |                                                                                                                                                                     | 96.5  | 98.8  | 127.6 | 122.9 | 83    | 85.8  | 85.2  | 89    |
| 6677795   | Polr2a             | 1932 | 213.3 |                                                                                                                                                                     | 97.4  | 101.8 | 103.2 | 101.3 | 100.4 | 102.2 | 94.1  | 96.7  |
| 189409138 | Cand1              | 1230 | 136.2 |                                                                                                                                                                     | 99.1  | 102.1 | 98.8  | 98.3  | 99.7  | 97    | 99.7  | 99.2  |
| 408357994 | Lsp1               | 324  | 35.9  |                                                                                                                                                                     | 62.7  | 39.5  | 58    | 47.2  | 107.4 | 102.3 | 90.4  | 78.1  |
| 110625624 | Tcp1               | 556  | 60.4  |                                                                                                                                                                     | 90.7  | 90.1  | 91.4  | 93.5  | 107.2 | 109.4 | 104.8 | 101.6 |
| 237820660 | Ubr4               | 5180 | 571.9 | Viral carcinogenesis                                                                                                                                                | 97    | 100.2 | 95    | 97.1  | 104.2 | 106.8 | 100.6 | 96.7  |
| 148747189 | Map4;<br>Mtap4     | 1125 | 117.4 |                                                                                                                                                                     | 106.9 | 106.8 | 102.9 | 104.3 | 93    | 90.7  | 102.6 | 102.7 |
| 157951604 | Cap1               | 474  | 51.5  |                                                                                                                                                                     | 104.2 | 103   | 108.1 | 108.6 | 85.3  | 84.4  | 82.7  | 84.8  |
| 268837785 | Sf3b2              | 878  | 98.1  | Spliceosome                                                                                                                                                         | 100.6 | 102.4 | 101.3 | 101.6 | 98.5  | 97.2  | 101   | 95.2  |
| 165932270 | Sf3a1              | 791  | 88.5  | Spliceosome                                                                                                                                                         | 97.7  | 94.8  | 98.7  | 101.5 | 99.4  | 101.1 | 99.2  | 99.2  |
| 33859484  | Mcm3               | 812  | 91.5  | DNA replication; Cell cycle                                                                                                                                         | 72.4  | 76.4  | 67.8  | 70.3  | 135.8 | 135.2 | 134.7 | 129.6 |
| 213418055 | Samhd1             | 658  | 75.8  |                                                                                                                                                                     | 118.1 | 117.5 | 105.4 | 108.7 | 84.4  | 85    | 79.9  | 81.7  |
| 261878543 | Mthfd1             | 935  | 101.1 | Metabolic pathways; One carbon pool by folate                                                                                                                       | 86.7  | 84.8  | 89.7  | 87.5  | 120.5 | 119.1 | 106   | 115.5 |
| 112293266 | Hspa4              | 842  | 94.1  | Antigen processing and presentation                                                                                                                                 | 93.2  | 94.9  | 88.4  | 88.1  | 105.8 | 105.1 | 113.6 | 114   |
| 120407050 | Nop58              | 536  | 60.3  | Ribosome biogenesis in eukaryotes                                                                                                                                   | 99.9  | 97.8  | 100   | 101.3 | 98    | 98.4  | 97.2  | 98.2  |
| 124486839 | Ccdc88b            | 1481 | 166.5 |                                                                                                                                                                     | 111.5 | 109.1 | 102   | 101.9 | 96.9  | 97.9  | 97.2  | 95.7  |
| 88014720  | Kpnb1              | 876  | 97.1  | RNA transport                                                                                                                                                       | 93.7  | 93.6  | 91.8  | 91.6  | 104.6 | 105.2 | 102.8 | 103.8 |
| 6679439   | Ppia               | 164  | 18    |                                                                                                                                                                     | 105.8 | 109.5 | 129.2 | 125.8 | 77.3  | 79.5  | 77.9  | 81    |
| 6755863   | Hsp90b1            | 802  | 92.4  | Thyroid hormone synthesis; Pathways in cancer; PI3K-Akt signaling pathway; Protein processing in endoplasmic reticulum; Estrogen signaling pathway; Prostate cancer | 73.1  | 75.1  | 80    | 79.9  | 130.1 | 128.7 | 127.8 | 129.9 |
| 82617575  | Eprs               | 1512 | 170   | Metabolic pathways; Aminoacyl-tRNA biosynthesis; Porphyrin and chlorophyll metabolism                                                                               | 83.2  | 82.1  | 82.6  | 81.8  | 116.4 | 117.1 | 115.1 | 117.2 |

|           |                            |      |       |                                                                                                                                                                                                                                                                 |       |       |       |       |       |       |       |       |
|-----------|----------------------------|------|-------|-----------------------------------------------------------------------------------------------------------------------------------------------------------------------------------------------------------------------------------------------------------------|-------|-------|-------|-------|-------|-------|-------|-------|
| 189458844 | Cnot1                      | 2371 | 266.2 | RNA degradation                                                                                                                                                                                                                                                 | 102   | 103.7 | 94.8  | 94.5  | 104.7 | 98.2  | 96.9  | 98.2  |
| 13430890  | Hist1h1e                   | 219  | 22    |                                                                                                                                                                                                                                                                 | 99.3  | 106.5 | 123.2 | 124.6 | 94    | 89.4  | 85.2  | 82.5  |
| 225735584 | Hk1                        | 918  | 102.2 | Neomycin, kanamycin and gentamicin biosynthesis; Type II diabetes mellitus; Carbohydrate digestion and absorption; Insulin signaling pathway; Metabolic pathways; Amino sugar and nucleotide sugar metabolism; Starch and sucrose metabolism: Glycolysis / Gluc | 105   | 102.5 | 103.2 | 100.5 | 94.8  | 94.6  | 90.3  | 95.3  |
| 121949765 | Tmpo                       | 452  | 50.3  |                                                                                                                                                                                                                                                                 | 115.8 | 108.7 | 107.3 | 106.8 | 92.3  | 88.5  | 78.9  | 85.4  |
| 24418903  | Fermt3                     | 665  | 75.6  | Platelet activation                                                                                                                                                                                                                                             | 99    | 98.5  | 103.5 | 105.8 | 96.7  | 97.1  | 90.5  | 86.8  |
| 472339066 | Ilf3                       | 911  | 97.7  |                                                                                                                                                                                                                                                                 | 98.2  | 100.1 | 96.2  | 96.9  | 96.7  | 95.3  | 100.6 | 100.1 |
| 226958458 | Pfas                       | 1337 | 144.5 | Metabolic pathways; Purine metabolism                                                                                                                                                                                                                           | 103.4 | 99.7  | 109.4 | 110.2 | 100.7 | 105.9 | 94.4  | 97.7  |
| 118136288 | Fmnl1                      | 1094 | 122   |                                                                                                                                                                                                                                                                 | 104.7 | 103   | 108   | 108.8 | 87.4  | 91.1  | 90.6  | 89.2  |
| 124487099 | Hnrnpul2                   | 745  | 84.9  |                                                                                                                                                                                                                                                                 | 99.8  | 99    | 108.9 | 105.5 | 94.2  | 92.5  | 98.2  | 98.9  |
| 238814391 | Cct7                       | 544  | 59.6  |                                                                                                                                                                                                                                                                 | 92.2  | 88.8  | 91.4  | 89.6  | 111   | 110.9 | 100.8 | 101.8 |
| 291463269 | Smarca4                    | 1617 | 181.7 |                                                                                                                                                                                                                                                                 | 102.4 | 104.9 | 96.8  | 98.2  | 99.4  | 98.1  | 100.4 | 100.4 |
| 311893360 | Dctn1                      | 1239 | 136.8 |                                                                                                                                                                                                                                                                 | 103.2 | 104   | 99.5  | 96.1  | 98.4  | 97.1  | 99.4  | 102   |
| 70608131  | Immt                       | 757  | 83.8  |                                                                                                                                                                                                                                                                 | 98.8  | 98.8  | 97    | 98.4  | 101.7 | 102   | 103.3 | 100   |
| 126090505 | Nasp                       | 448  | 48.7  |                                                                                                                                                                                                                                                                 | 88    |       | 87.8  |       | 108.6 |       | 121.5 |       |
| 157277950 | Rdx                        | 583  | 68.5  | Regulation of actin cytoskeleton; MicroRNAs in cancer; Proteoglycans in cancer                                                                                                                                                                                  | 100   | 98.3  | 98.3  | 98.2  | 98.2  | 97.1  | 104.4 | 108.8 |
| 113195686 | Lmnb2                      | 596  | 67.3  | Apoptosis                                                                                                                                                                                                                                                       | 119.1 | 116.1 | 118.1 | 117   | 86.9  | 87.7  | 91.3  | 92.3  |
| 169234624 | Mki67                      | 3177 | 350.7 |                                                                                                                                                                                                                                                                 | 65.4  | 73    | 59.5  | 65.4  | 153.4 | 154.6 | 160   | 144.1 |
| 172088119 | Mcm2                       | 904  | 102   | DNA replication; Cell cycle                                                                                                                                                                                                                                     | 70.5  | 72.5  | 73    | 75.5  | 133.1 | 134.8 | 130.9 | 126.9 |
| 33859482  | Eef2                       | 858  | 95.3  | Oxytocin signaling pathway; AMPK signaling pathway                                                                                                                                                                                                              | 78.7  | 81.1  | 90.8  | 94.8  | 125.9 | 123.1 | 107.9 | 107.4 |
| 21450625  | Eif4a1                     | 406  | 46.1  | RNA transport                                                                                                                                                                                                                                                   | 88.4  | 87.8  | 88.1  | 88.2  | 113.4 | 114.7 | 112.1 | 107.9 |
| 18079339  | Aco2                       | 780  | 85.4  | Citrate cycle (TCA cycle); Metabolic pathways; Biosynthesis of amino acids; 2-Oxocarboxylic acid metabolism: Carbon metabolism: Glyoxylate and                                                                                                                  | 108.3 | 108.4 | 108.9 | 111.5 | 94.2  | 93.5  | 91.9  | 92.6  |
| 21450321  | Atp1a3                     | 1053 | 115.9 |                                                                                                                                                                                                                                                                 |       |       |       |       |       |       |       |       |
| 149251776 | LOC100046628; LOC102643093 | 292  | 32.6  |                                                                                                                                                                                                                                                                 | 89.6  | 89.1  | 89.4  | 91.1  | 111.3 | 115.4 | 118.4 | 109.4 |
| 262263372 | Ahcy; Gm4737               | 432  | 47.7  | Metabolic pathways; Cysteine and methionine metabolism                                                                                                                                                                                                          | 110.1 | 113   | 120.2 | 116.8 | 89.3  | 90.2  | 91.1  | 88.2  |
| 327180732 | Dnmt1                      | 1620 | 183.1 | MicroRNAs in cancer; Metabolic pathways; Cysteine and methionine metabolism                                                                                                                                                                                     | 83.9  | 81.2  | 85    | 84.1  | 122.6 | 130   | 119.6 | 121.6 |
| 134053905 | Psm11                      | 422  | 47.4  | Proteasome; Epstein-Barr virus infection                                                                                                                                                                                                                        | 89.9  | 89.3  | 88.7  | 87.8  | 110.7 | 111.1 | 108.3 | 106   |
| 83921618  | Ezr                        | 586  | 69.4  | Leukocyte transendothelial migration; Regulation of actin cytoskeleton; MicroRNAs in cancer; Proteoglycans in cancer: Gastric acid secretion                                                                                                                    | 110.5 | 115.8 | 105.5 | 107.9 | 86.8  | 88.7  | 92.5  | 87.6  |
| 78190507  | Xpo1                       | 1071 | 123   | Epstein-Barr virus infection; HTLV-I infection; Ribosome biogenesis in eukaryotes; Influenza A; RNA transport                                                                                                                                                   | 97.6  | 95.5  | 94.4  | 92.4  | 101.4 | 101.9 | 98    | 100.8 |

|           |                                       |      |       |                                                                                                                                                                                                                                                                |       |       |       |       |       |       |       |       |
|-----------|---------------------------------------|------|-------|----------------------------------------------------------------------------------------------------------------------------------------------------------------------------------------------------------------------------------------------------------------|-------|-------|-------|-------|-------|-------|-------|-------|
| 27370092  | Tufm                                  | 452  | 49.5  |                                                                                                                                                                                                                                                                | 106.9 | 104.2 | 107.8 | 107.2 | 93.4  | 95.8  | 95.9  | 98.4  |
| 309267107 | LOC100045191; Hnrnpa2b1; LOC102642938 | 341  | 36    |                                                                                                                                                                                                                                                                | 94.5  | 91.1  | 119.9 | 118.7 | 89.9  | 91.8  | 90.9  | 91.7  |
| 124244096 | Sart1                                 | 806  | 90.8  | Spliceosome                                                                                                                                                                                                                                                    | 99.1  | 96.3  | 101   | 98.2  | 100   | 99.3  | 103.2 | 103.9 |
| 84043961  | Eif5b                                 | 1216 | 137.5 | RNA transport                                                                                                                                                                                                                                                  | 88.1  | 83.5  | 91.5  | 87.5  | 115.1 | 116.3 | 109.3 | 114.1 |
| 21312352  | Skiv2l2                               | 1040 | 117.6 | RNA degradation                                                                                                                                                                                                                                                | 101.3 | 98.5  | 97.5  | 96.9  | 101.5 | 101.1 | 103.9 | 104.5 |
| 7305619   | Usp5                                  | 858  | 95.8  |                                                                                                                                                                                                                                                                | 98.8  | 99.9  | 103   | 103.3 | 100.1 | 99.5  | 95.7  | 98.1  |
| 27369581  | Slc25a12                              | 677  | 74.5  |                                                                                                                                                                                                                                                                | 107   | 108.3 | 105.6 | 104   | 91.4  | 90.5  | 91.2  | 89.2  |
| 29789343  | Eif3b                                 | 803  | 91.3  | RNA transport                                                                                                                                                                                                                                                  | 92.8  | 92.3  | 87.4  | 87.7  | 110.4 | 109.6 | 115.4 | 112.5 |
| 42415475  | P4hb                                  | 509  | 57    | Protein processing in endoplasmic reticulum                                                                                                                                                                                                                    | 85.6  | 87.7  | 84.7  | 83.1  | 122   | 121.5 | 94.3  | 92.5  |
| 23346561  | Nat10                                 | 1024 | 115.3 | Ribosome biogenesis in eukaryotes                                                                                                                                                                                                                              | 88.5  | 89.3  | 88    | 92.3  | 115.9 | 111.9 | 115   | 114.4 |
| 40254124  | Smarca5                               | 1051 | 121.6 |                                                                                                                                                                                                                                                                | 93.6  | 94.1  | 94.4  | 95.8  | 106   | 106.6 | 101.5 | 99.5  |
| 9790051   | Pfkip                                 | 784  | 85.4  | RNA degradation; Metabolic pathways; Biosynthesis of amino acids; Glycolysis / Gluconeogenesis; Thyroid hormone signaling pathway; Pentose phosphate pathway; AMPK signaling pathway; Carbon metabolism; Fructose and mannose metabolism; Galactose metabolism | 81.5  | 83.5  | 85.3  | 83    | 117.2 | 111.6 | 112.3 | 114.9 |
| 165932379 | Serbp1                                | 392  | 42.9  |                                                                                                                                                                                                                                                                | 72.3  | 71.3  | 95.2  | 93.6  | 101.7 | 108.2 | 131.7 | 136.7 |
| 87299637  | Dnm2                                  | 869  | 97.9  |                                                                                                                                                                                                                                                                | 78.9  | 78.7  | 117.9 | 122.6 | 107.7 | 104.3 | 99.1  | 92.5  |
| 116517301 | Ptbp1                                 | 555  | 59.3  |                                                                                                                                                                                                                                                                | 97.3  | 94.8  | 94.3  | 99.7  | 94.8  | 98.8  | 105.9 | 103   |
| 6753620   | Ddx3x                                 | 662  | 73.1  | RIG-I-like receptor signaling pathway; Hepatitis B; Viral carcinogenesis                                                                                                                                                                                       | 79.2  | 80.4  | 84.2  | 82.3  | 122.6 | 121.9 | 118.7 | 116.6 |
| 110835723 | Dhx15                                 | 795  | 90.9  | Spliceosome                                                                                                                                                                                                                                                    | 105.3 | 103.5 | 100.3 | 102.5 | 96.1  | 97.3  | 92.9  | 92.9  |
| 24418919  | Pygb                                  | 843  | 96.7  | Insulin signaling pathway; Metabolic pathways; Insulin resistance; Starch and sucrose metabolism; Glucagon signaling pathway                                                                                                                                   | 100   | 103.5 | 99.8  | 99.8  | 95.3  | 92.3  | 95.3  | 91.7  |
| 329299035 | Sun2                                  | 731  | 81.6  |                                                                                                                                                                                                                                                                | 109.8 | 109.9 | 108.3 | 106.2 | 85.6  | 88.7  | 86    | 88.3  |
| 153945749 | Top2a                                 | 1528 | 172.7 | Platinum drug resistance                                                                                                                                                                                                                                       | 57    | 50.9  | 54.3  | 49.4  | 157.5 | 167.1 | 167.3 | 172.6 |
| 229892322 | Ndufs1                                | 727  | 79.7  | Metabolic pathways; Huntington's disease; Non-alcoholic fatty liver disease (NAFLD); Oxidative phosphorylation; Parkinson's disease; Alzheimer's disease                                                                                                       | 105.6 | 104.2 | 103.5 | 104.4 | 96.6  | 95.2  | 95.4  | 96.1  |
| 29788787  | Syncrip                               | 562  | 62.6  |                                                                                                                                                                                                                                                                | 84.5  | 83.1  | 84.1  | 86.1  | 110   | 112.9 | 116.6 | 114.5 |
| 124487133 | Mdn1                                  | 5582 | 629.2 | Ribosome biogenesis in eukaryotes                                                                                                                                                                                                                              | 89.8  | 90.2  | 86.4  | 82.3  | 116.6 | 117.6 | 114.2 | 112.4 |
| 52353955  | Phgdh                                 | 533  | 56.5  | Metabolic pathways; Biosynthesis of amino acids; Glycine, serine and threonine metabolism; Carbon metabolism                                                                                                                                                   | 79.9  | 77.5  | 79.7  | 76.2  | 119.3 | 122.2 | 128.3 | 131.2 |
| 10242373  | Mcm7                                  | 719  | 81.2  | DNA replication; Cell cycle                                                                                                                                                                                                                                    | 74.6  | 73.7  | 72.5  | 72.3  | 139.3 | 135.4 | 107.7 | 114.7 |
| 459447367 | Add3                                  | 706  | 78.7  |                                                                                                                                                                                                                                                                | 119.1 | 110.3 | 113.2 | 114.5 | 80.7  | 84.5  | 81.1  | 80    |
| 358439536 | Immt                                  | 709  | 78.7  |                                                                                                                                                                                                                                                                | 99.5  | 101   | 100.3 | 93.4  | 99.3  | 98.7  | 101.7 | 103.7 |



|           |                                       |      |       |                                                                                                                                                                                                                                                                             |       |       |       |       |       |       |       |       |
|-----------|---------------------------------------|------|-------|-----------------------------------------------------------------------------------------------------------------------------------------------------------------------------------------------------------------------------------------------------------------------------|-------|-------|-------|-------|-------|-------|-------|-------|
| 357394934 | Nono                                  | 473  | 54.5  |                                                                                                                                                                                                                                                                             | 91.9  | 96    | 96.9  | 100.6 | 100.9 | 103.1 | 99.5  | 100.1 |
| 34328130  | Hcfc1                                 | 2045 | 210.3 | Herpes simplex infection                                                                                                                                                                                                                                                    | 102.1 | 103.4 | 103.7 | 102.2 | 90.2  | 91.4  | 94.5  | 100.1 |
| 190194393 | Dock10                                | 2187 | 249.4 |                                                                                                                                                                                                                                                                             | 108.1 | 106.3 | 111.2 | 110.3 | 96.5  | 94.3  | 100.5 | 95.5  |
| 7709986   | Uba2                                  | 638  | 70.5  | Ubiquitin mediated proteolysis                                                                                                                                                                                                                                              | 101.7 | 105.1 | 102.5 | 103.5 | 99.3  | 97.6  | 95.5  | 94.1  |
| 283806543 | Nup133                                | 1155 | 128.5 | RNA transport                                                                                                                                                                                                                                                               | 95.2  | 90.3  | 92    | 91.4  | 105   | 105.8 | 103.3 | 109.9 |
| 112420990 | Pnn                                   | 726  | 82.5  | mRNA surveillance pathway; RNA transport                                                                                                                                                                                                                                    | 98    | 100   | 95.7  | 95.2  | 98.5  | 102.6 | 109.4 | 106.9 |
| 27369533  | Nup93                                 | 819  | 93.2  | RNA transport                                                                                                                                                                                                                                                               | 92.7  | 97.2  | 89.6  | 93    | 111.1 | 106.1 | 97.8  | 101.2 |
| 27923921  | Pyhin1;<br>Ifi209                     | 420  | 46.9  |                                                                                                                                                                                                                                                                             | 100.9 | 103.6 | 109.5 | 108.1 | 85    | 85.5  | 80.9  | 79.7  |
| 255918149 | Mcm4                                  | 862  | 96.7  | DNA replication; Cell cycle                                                                                                                                                                                                                                                 | 74.3  | 73    | 71.6  | 70.3  | 129.6 | 127.6 | 126.9 | 130   |
| 85861218  | Gmps                                  | 693  | 76.7  | Metabolic pathways; Purine metabolism; Drug metabolism<br>- other enzymes                                                                                                                                                                                                   | 87    | 87.8  | 83.3  | 87.2  | 113.8 | 114.1 | 117.7 | 116.9 |
| 124378033 | Nup214                                | 2085 | 212.8 | Epstein-Barr virus infection; RNA transport                                                                                                                                                                                                                                 | 96.4  | 94.7  | 96.3  | 94.3  | 108.4 | 108   | 105.1 | 104.1 |
| 31982186  | Mdh2                                  | 338  | 35.6  | Pyruvate metabolism; Citrate cycle (TCA cycle); Metabolic<br>pathways; Cysteine and methionine metabolism; Carbon<br>metabolism; Gluoxylate and dicarboxylate metabolism                                                                                                    | 107.2 | 110.2 | 104.8 | 105.7 | 92.3  | 92.1  | 95.5  | 95.1  |
| 6754994   | Pcbp1                                 | 356  | 37.5  | Spliceosome                                                                                                                                                                                                                                                                 | 102.9 | 100.5 | 90.8  | 99.4  | 109.4 | 97    | 105   | 104.7 |
| 87196334  | Tcerg1                                | 1100 | 123.7 | Spliceosome                                                                                                                                                                                                                                                                 | 105.1 | 106.6 | 100.7 | 99.4  | 93.4  | 92.1  | 99.5  | 99.8  |
| 117606214 | Xrn2                                  | 951  | 108.6 | RNA degradation; Ribosome biogenesis in eukaryotes                                                                                                                                                                                                                          | 99.8  | 101.5 | 99.6  | 99.4  | 96.3  | 99.1  | 94    | 92.2  |
| 294997245 | Hist1h2be;<br>Hist1h2bc;<br>Hist1h2bg | 126  | 13.9  | Alcoholism; Systemic lupus erythematosus; Viral<br>carcinogenesis                                                                                                                                                                                                           | 110.3 | 112.4 | 112.7 | 105.4 | 88.2  | 92.4  | 77.7  | 87.6  |
| 7657011   | Ddb1                                  | 1140 | 126.8 | Ubiquitin mediated proteolysis; Hepatitis B; Nucleotide<br>excision repair; Viral carcinogenesis                                                                                                                                                                            | 99.6  | 100.7 | 98.3  | 94.6  | 100.4 | 98.5  | 98.4  | 100.7 |
| 6755382   | Ruvbl2                                | 463  | 51.1  |                                                                                                                                                                                                                                                                             | 90.7  | 91.1  | 88.5  | 88.5  | 108   | 109.3 | 114.1 | 113   |
| 6755901   | Tuba1a                                | 451  | 50.1  | Phagosome; Gap junction; Apoptosis                                                                                                                                                                                                                                          | 78.4  | 80.4  | 80.8  | 80.7  | 118.8 | 118.6 | 117.4 | 116.4 |
| 13591862  | Set                                   | 289  | 33.4  |                                                                                                                                                                                                                                                                             | 99.8  | 98.2  | 95.6  | 96.2  | 99.9  | 96.5  | 98.3  | 100.5 |
| 46559406  | Pak2                                  | 524  | 57.9  | ErbB signaling pathway; T cell receptor signaling pathway;<br>Regulation of actin cytoskeleton; MAPK signaling<br>pathway; Ras signaling pathway; Focal adhesion; Axon<br>guidance; Renal cell carcinoma                                                                    | 100.3 | 100.1 | 99.6  | 101.5 | 92    | 92.8  | 98.7  | 97.7  |
| 31560653  | Pfkl                                  | 780  | 85.3  | RNA degradation; Metabolic pathways; Biosynthesis of<br>amino acids; Glycolysis / Gluconeogenesis; Pentose<br>phosphate pathway; HIF-1 signaling pathway; AMPK<br>signaling pathway; Carbon metabolism; Fructose and<br>mannose metabolism; Galactose metabolism; Central c | 92.9  | 91    | 90.2  | 92.3  | 113.1 | 109   | 110.6 | 109.3 |
| 19527028  | Hdlbp                                 | 1268 | 141.7 |                                                                                                                                                                                                                                                                             | 89.9  | 87.2  | 87.5  | 86.9  | 116.5 | 118.4 | 105   | 110.2 |
| 23956084  | Acadvl                                | 656  | 70.8  | Fatty acid metabolism; Metabolic pathways; Fatty acid<br>degradation                                                                                                                                                                                                        | 99    | 99.6  | 93.1  | 94.7  | 102   | 104.2 | 101.1 | 101.2 |
| 6753492   | Coro1a                                | 461  | 51    | Tuberculosis; Phagosome                                                                                                                                                                                                                                                     | 101.7 | 99.7  | 115   | 114.4 | 81.8  | 81.8  | 80.2  | 82.7  |
| 18266680  | Oxct1                                 | 520  | 56    | Valine, leucine and isoleucine degradation; Butanoate<br>metabolism; Synthesis and degradation of ketone bodies                                                                                                                                                             | 96.2  | 97.2  | 102.1 | 103.5 | 106.4 | 107.3 | 104.4 | 107   |
| 33563246  | Cast                                  | 754  | 81.4  |                                                                                                                                                                                                                                                                             | 127.4 | 121.9 | 107.1 | 106.3 | 84.7  | 80.3  | 88.4  | 89.6  |

|           |        |      |       |                                                                                                                                                                                                                                                                 |       |       |       |       |       |       |       |       |
|-----------|--------|------|-------|-----------------------------------------------------------------------------------------------------------------------------------------------------------------------------------------------------------------------------------------------------------------|-------|-------|-------|-------|-------|-------|-------|-------|
| 257743039 | Ldha   | 361  | 39.7  |                                                                                                                                                                                                                                                                 | 90.9  | 89.6  | 99.1  | 97.3  | 100.2 | 100.8 | 101.9 | 103.3 |
| 114145505 | Hsph1  | 858  | 96.3  | Protein processing in endoplasmic reticulum                                                                                                                                                                                                                     | 86.9  | 84.4  | 84.9  | 84.9  | 116.5 | 115.6 | 125.5 | 124.2 |
| 325910859 | Set    | 277  | 32.1  |                                                                                                                                                                                                                                                                 | 99.7  | 97.4  | 90.3  | 85.3  | 83.2  | 85.8  | 144.4 | 149   |
| 108860695 | Cbx3   | 183  | 20.8  |                                                                                                                                                                                                                                                                 | 112.9 | 113.5 | 114.7 | 112.4 | 77.1  | 76.7  | 84.9  | 84.3  |
| 145207992 | Dis3   | 958  | 108.8 | RNA degradation                                                                                                                                                                                                                                                 | 100   | 99.8  | 100.5 | 101.2 | 100.4 | 100.9 | 101.1 | 100.7 |
| 448261635 | Dnm1l  | 716  | 80.2  | TNF signaling pathway; NOD-like receptor signaling pathway                                                                                                                                                                                                      | 102.4 | 103.9 | 97.1  | 97.9  | 103.4 | 99    | 102.4 | 100   |
| 160420299 | Ddx46  | 1031 | 117.3 |                                                                                                                                                                                                                                                                 | 101.1 | 98.9  | 102.6 | 102.7 | 94.8  | 95.3  | 95.7  | 93.9  |
| 28416440  | Gimap4 | 328  | 38    |                                                                                                                                                                                                                                                                 | 112.5 | 110.7 | 109.9 | 111.5 | 73.2  | 74.7  | 74.5  | 72.5  |
| 78711838  | Ap2b1  | 951  | 105.7 | Endocytosis; Endocrine and other factor-regulated calcium reabsorption; Huntington's disease; Synaptic vesicle cycle                                                                                                                                            | 93.4  | 96.1  | 95.9  | 95.4  | 104.2 | 104.1 | 103.6 | 102.2 |
| 126362973 | Stk10  | 966  | 111.8 |                                                                                                                                                                                                                                                                 | 116.8 | 109.2 | 109.3 | 107.5 | 83.7  | 83.4  | 87.1  | 89.2  |
| 154146209 | Usp7   | 1103 | 128.4 | FoxO signaling pathway; Herpes simplex infection; Epstein-Barr virus infection; Viral carcinogenesis                                                                                                                                                            | 107.7 | 109   | 103.8 | 104.7 | 95.9  | 94.7  | 89.8  | 86.3  |
| 12963737  | Cse1l  | 971  | 110.4 |                                                                                                                                                                                                                                                                 | 96.2  | 95.5  | 97.4  | 96.5  | 102.3 | 103.3 | 97.8  | 97.5  |
| 356995875 | Cyfp2  | 1253 | 145.6 | Regulation of actin cytoskeleton; RNA transport                                                                                                                                                                                                                 | 100.3 | 98.8  | 99.4  | 98.1  | 98.5  | 100   | 101.6 | 102.8 |
| 254553458 | Gpi1   | 558  | 62.7  | Metabolic pathways; Amino sugar and nucleotide sugar metabolism; Starch and sucrose metabolism; Glycolysis / Gluconeogenesis; Pentose phosphate pathway; Carbon metabolism                                                                                      | 102.1 | 101.9 | 94    | 93.7  | 97.3  | 96.8  | 102.2 | 103.7 |
| 6755212   | Psmel  | 249  | 28.7  | Proteasome; Antigen processing and presentation                                                                                                                                                                                                                 | 118.3 | 119.6 | 117   | 117.3 | 82.3  | 83.6  | 87.6  | 87.2  |
| 7106303   | Ehd1   | 534  | 60.6  | Endocytosis                                                                                                                                                                                                                                                     | 98.7  | 94.8  | 98.9  | 102.5 | 106.4 | 102.7 | 98.5  | 98.5  |
| 28892935  | Ce2d1b | 848  | 93    |                                                                                                                                                                                                                                                                 | 99.1  | 102.3 | 99    | 98.9  | 104.8 | 107.8 | 103.9 | 103   |
| 226437676 | Nup205 | 2008 | 227.3 | RNA transport                                                                                                                                                                                                                                                   | 92.4  | 95    | 97.3  | 97.2  | 108.3 | 110.2 | 99.5  | 96.9  |
| 29126205  | Acaa2  | 397  | 41.8  | Fatty acid metabolism; Valine, leucine and isoleucine degradation; Metabolic pathways; Fatty acid degradation; Fatty acid elongation                                                                                                                            | 109.2 | 104.8 | 114.5 | 115.8 | 93.9  | 97.8  | 80    | 83.6  |
| 124249109 | Arid1a | 2283 | 241.9 |                                                                                                                                                                                                                                                                 | 108.7 | 109.9 | 101.9 | 102.4 | 93.6  | 94.6  | 96.3  | 95.5  |
| 15426055  | Copb1  | 953  | 107   |                                                                                                                                                                                                                                                                 | 94.4  | 93.3  | 92.4  | 90.1  | 103.9 | 104.6 | 107.4 | 108.9 |
| 46519149  | Heatr1 | 2143 | 241.9 | Ribosome biogenesis in eukaryotes                                                                                                                                                                                                                               | 94.4  | 91.7  | 91    | 87.3  | 113   | 124   | 107.8 | 110.7 |
| 6679891   | Ganab  | 966  | 109.3 |                                                                                                                                                                                                                                                                 | 92.6  | 91.9  | 101.4 | 98.3  | 107   | 106.2 | 90.4  | 91.9  |
| 118150674 | Stag2  | 1231 | 141.2 | Cell cycle                                                                                                                                                                                                                                                      | 98.7  | 97.4  | 100.7 | 102.4 | 100   | 97.7  | 95.7  | 94.7  |
| 295054316 | Nsun2  | 757  | 85.4  |                                                                                                                                                                                                                                                                 | 88.8  | 91.1  | 87.2  | 88.9  | 111.6 | 110.2 | 114.7 | 110.9 |
| 134053913 | Psm5   | 504  | 55.9  |                                                                                                                                                                                                                                                                 | 105.9 | 103.3 | 98.2  | 101.2 | 91.4  | 93.9  | 93.4  | 94    |
| 93102415  | Gart   | 1010 | 107.4 | Metabolic pathways; Purine metabolism; Antifolate resistance; One carbon pool by folate                                                                                                                                                                         | 85.3  | 90.3  | 90.6  | 89.3  | 118.2 | 111.7 | 121.9 | 120.9 |
| 171846285 | Hp1bp3 | 554  | 60.8  |                                                                                                                                                                                                                                                                 | 109.9 | 112.2 | 101.1 | 95.2  | 83.3  | 84.9  | 82.1  | 82.2  |
| 111607447 | Itgb2  | 770  | 84.8  | Leukocyte transendothelial migration; Regulation of actin cytoskeleton; Staphylococcus aureus infection; Rheumatoid arthritis; Hippo signaling pathway; Tuberculosis; Cell adhesion molecules (CAMs); HTLV-I infection; Phagosome; Complement and coagulation c | 88.8  | 90.4  | 104.2 | 103.3 | 105   | 102.6 | 97.9  | 99.5  |

|           |                 |      |       |                                                                                                                                                                                                                                                                 |       |       |       |       |       |       |       |       |
|-----------|-----------------|------|-------|-----------------------------------------------------------------------------------------------------------------------------------------------------------------------------------------------------------------------------------------------------------------|-------|-------|-------|-------|-------|-------|-------|-------|
| 13384620  | Hnrnpk          | 463  | 50.9  | Herpes simplex infection; MicroRNAs in cancer; Spliceosome; Viral carcinogenesis                                                                                                                                                                                | 102.9 | 104.6 | 103.5 | 102.4 | 93.1  | 92.5  | 95.8  | 94.1  |
| 66955886  | Pds5b           | 1446 | 164.3 |                                                                                                                                                                                                                                                                 | 104.4 | 105   | 101.1 | 100.2 | 97.3  | 98.9  | 94.6  | 94.3  |
| 165932375 | Serbp1          | 407  | 44.7  |                                                                                                                                                                                                                                                                 | 89    | 91.5  | 91.1  | 91.6  | 103.8 | 105   | 119.9 | 118.4 |
| 19882201  | Psm2            | 908  | 100.1 | Proteasome; Epstein-Barr virus infection                                                                                                                                                                                                                        | 87.3  | 87.3  | 85.6  | 85.1  | 111.9 | 113.3 | 114.8 | 112.2 |
| 226437613 | Sympk           | 1288 | 142.5 | mRNA surveillance pathway; Tight junction                                                                                                                                                                                                                       | 106.5 | 103.7 | 96.8  | 96.6  | 97.6  | 94.8  | 100.5 | 103.4 |
| 359751455 | Itgal           | 1162 | 128.2 | Leukocyte transendothelial migration; Regulation of actin cytoskeleton; Staphylococcus aureus infection; Rheumatoid arthritis; Epstein-Barr virus infection; Cell adhesion molecules (CAMs); HTLV-I infection; Rap1 signaling pathway; Viral myocarditis; Natur | 81.9  | 88.2  | 134.6 | 116.6 | 140.2 | 134.8 | 78.1  | 76.8  |
| 13384672  | Ftsj3           | 838  | 95.5  |                                                                                                                                                                                                                                                                 | 85.2  | 80.4  | 89.3  | 85    | 116.7 | 121.2 | 122.8 | 126.6 |
| 25141235  | Ddx3y           | 658  | 73.4  |                                                                                                                                                                                                                                                                 | 100.4 | 95.2  | 100.3 | 95    | 118.6 | 120.7 | 106.1 | 112.6 |
| 6678938   | Msh2            | 935  | 104.1 | Platinum drug resistance; Pathways in cancer; Colorectal cancer; Mismatch repair                                                                                                                                                                                | 97.4  | 98.9  | 91.3  | 91.3  | 110   | 112.9 | 109.2 | 105.7 |
| 6678359   | Tkt             | 623  | 67.6  | Metabolic pathways; Biosynthesis of amino acids; Pentose phosphate pathway; Carbon metabolism                                                                                                                                                                   | 103.4 | 102   | 103.2 | 107   | 93.1  | 94    | 95.1  | 92.6  |
| 20806109  | Parp1           | 1014 | 112.7 | NF-kappa B signaling pathway; Base excision repair; Apoptosis                                                                                                                                                                                                   | 105.1 | 108.1 | 104.7 | 102.4 | 99.1  | 94.7  | 98.7  | 96.9  |
| 254281243 | Evl             | 414  | 44.3  |                                                                                                                                                                                                                                                                 | 109.1 | 108.8 | 108.2 | 113.4 | 92.7  | 89.6  | 92    | 89.7  |
| 54287684  | Eef1d           | 281  | 31.3  | Herpes simplex infection                                                                                                                                                                                                                                        | 81.8  |       | 79.8  |       | 118.3 |       | 128.9 |       |
| 392871554 | Ptprc           | 1293 | 144.7 | T cell receptor signaling pathway; Primary immunodeficiency; Cell adhesion molecules (CAMs); Fc gamma R-mediated phagocytosis                                                                                                                                   | 83.8  | 83.9  | 89.9  | 90.5  | 104.8 | 104.6 | 107.3 | 106.8 |
| 226437674 | Utp20           | 2789 | 317.7 |                                                                                                                                                                                                                                                                 | 87.9  | 89.3  | 86.5  | 83.9  | 114.2 | 117.8 | 114.2 | 115.8 |
| 299522842 | Dctn2           | 407  | 44.7  |                                                                                                                                                                                                                                                                 | 105.7 | 107   | 102   | 98.7  | 93.7  | 95.8  | 97.7  | 93.1  |
| 21312298  | Shmt2           | 504  | 55.7  | Metabolic pathways; Biosynthesis of amino acids; Glycine, serine and threonine metabolism; Antifolate resistance; Carbon metabolism; One carbon pool by folate; Glyoxylate and dicarboxylate metabolism                                                         | 64.7  | 66    | 67.3  | 66.4  | 149.7 | 142.8 | 147.9 | 146.7 |
| 20149756  | Eif4a3          | 411  | 46.8  | mRNA surveillance pathway; Spliceosome; RNA transport                                                                                                                                                                                                           | 98    | 98.6  | 96.4  | 97.8  | 99.6  | 99.8  | 88.6  | 95.3  |
| 21703842  | D10Wsu52e; Rtcb | 505  | 55.2  |                                                                                                                                                                                                                                                                 | 101.4 | 100.9 | 92.6  | 94.1  | 101.4 | 100.1 | 104.2 | 105.7 |
| 94158994  | Api5            | 504  | 56.8  |                                                                                                                                                                                                                                                                 | 106.8 | 105.4 | 100   | 99.8  | 92.7  | 91.1  | 102.5 | 102.3 |
| 313151222 | Acy             | 1101 | 120.7 |                                                                                                                                                                                                                                                                 | 94    | 90.2  | 90    | 88.8  | 113.8 | 117.9 | 100.4 | 108.6 |
| 19923871  | Mical1          | 1048 | 116.7 |                                                                                                                                                                                                                                                                 | 109.3 | 107.6 | 110.7 | 108.1 | 91.6  | 89.9  | 91.3  | 92.3  |
| 19527256  | Ddx1            | 740  | 82.4  |                                                                                                                                                                                                                                                                 | 94.5  | 94    | 99    | 98.1  | 106.1 | 106.3 | 99.3  | 99.7  |
| 260166721 | Ckap5           | 2032 | 225.5 |                                                                                                                                                                                                                                                                 | 92.4  | 93    | 100.2 | 97.7  | 104.7 | 106   | 101   | 108   |
| 118344444 | Iqgap2          | 1575 | 180.4 | Regulation of actin cytoskeleton                                                                                                                                                                                                                                | 114.6 | 111.7 | 109.3 | 114.3 | 97.7  | 91.2  | 85.3  | 87.6  |
| 14192922  | Acte1           | 377  | 42    | Hypertrophic cardiomyopathy (HCM); Dilated cardiomyopathy; Cardiac muscle contraction; Adrenergic signaling in cardiomyocytes                                                                                                                                   | 76.4  | 90.7  | 81.6  | 90    | 114.2 | 87.8  | 80.1  | 103.3 |

|           |          |      |       |                                                                                                                                                                                                                                                                 |       |       |       |       |       |       |       |       |
|-----------|----------|------|-------|-----------------------------------------------------------------------------------------------------------------------------------------------------------------------------------------------------------------------------------------------------------------|-------|-------|-------|-------|-------|-------|-------|-------|
| 61888838  | Hsd17b10 | 261  | 27.3  | Valine, leucine and isoleucine degradation; Metabolic pathways; Alzheimer's disease                                                                                                                                                                             | 99.3  | 96.8  | 98.5  | 99.8  | 104.1 | 104.6 | 91.8  | 91.9  |
| 9790083   | Ruvbl1   | 456  | 50.2  | Wnt signaling pathway                                                                                                                                                                                                                                           | 93.7  | 94.2  | 89.7  | 90.7  | 106.2 | 105.1 | 113.6 | 109.4 |
| 160333229 | Capn1    | 713  | 82.1  | Alzheimer's disease; Protein processing in endoplasmic reticulum; Apoptosis                                                                                                                                                                                     | 108.9 | 112.3 | 112.6 | 110.4 | 90.4  | 88.5  | 84.8  | 82.2  |
| 254692855 | Rad21    | 635  | 72    | Cell cycle                                                                                                                                                                                                                                                      | 102.7 | 104.3 | 105.1 | 104   | 94    | 97.8  | 86.2  | 96.3  |
| 166235125 | Smarcc2  | 1213 | 132.5 |                                                                                                                                                                                                                                                                 | 106.9 | 111.1 | 105.7 | 105.6 | 95.9  | 93.1  | 93.8  | 94.9  |
| 9790247   | Sae1     | 350  | 38.6  | Ubiquitin mediated proteolysis                                                                                                                                                                                                                                  | 101.1 | 98.8  | 105.2 | 105   | 97.1  | 98.9  | 91    | 96.3  |
| 22507357  | Rps6ka3  | 740  | 83.6  | mTOR signaling pathway; MAPK signaling pathway; Progesterone-mediated oocyte maturation; Long-term potentiation; Insulin resistance; Oocyte meiosis; Neurotrophin signaling pathway                                                                             | 102.2 | 105   | 109.9 | 108.3 | 94.1  | 92.9  | 83.2  | 83.3  |
| 14149756  | Eif2s2   | 331  | 38.1  | RNA transport                                                                                                                                                                                                                                                   | 78.6  | 79.7  | 84.7  | 85.7  | 120.7 | 119.3 | 123.5 | 119.3 |
| 114431250 | Plaa     | 794  | 87.2  | Protein processing in endoplasmic reticulum                                                                                                                                                                                                                     | 99.6  | 101.2 | 101.1 | 101.8 | 96.1  | 97.2  | 99.3  | 96.9  |
| 165932368 | Stat5b   | 786  | 89.9  | ErbB signaling pathway; Acute myeloid leukemia; AGE-RAGE signaling pathway in diabetic complications; Prolactin signaling pathway; Jak-STAT signaling pathway; Chemokine signaling pathway; Hepatitis B; HTLV-I infection; Pathways in cancer: Th1 and Th2 cell | 96.5  | 97.6  | 98.5  | 96.2  | 92.9  | 92.8  | 90.6  | 95.3  |
| 255759968 | Stat5a   | 797  | 91.6  |                                                                                                                                                                                                                                                                 | 95.8  |       | 97.3  |       | 101.6 |       | 99.9  |       |
| 165377185 | Pycard   | 193  | 21.4  | NOD-like receptor signaling pathway; Pertussis; Salmonella infection; Legionellosis; Influenza A; Cytosolic DNA-sensing pathway                                                                                                                                 | 126.3 | 128.5 | 128.8 | 130.1 | 68.1  | 68.8  | 78    | 78    |
| 29789199  | Ipo5     | 1097 | 123.5 |                                                                                                                                                                                                                                                                 | 75.1  | 76.9  | 74    | 74.6  | 124.3 | 125.3 | 135.6 | 131.8 |
| 170295818 | Baz1b    | 1479 | 170.5 |                                                                                                                                                                                                                                                                 | 94.8  | 92.5  | 96.9  | 104.1 | 104.9 | 100.8 | 106.2 | 101   |
| 7110703   | Psmc5    | 406  | 45.6  | Proteasome; Epstein-Barr virus infection                                                                                                                                                                                                                        | 91.5  | 90.5  | 87.9  | 87.8  | 109.8 | 110.2 | 102.9 | 104.5 |
| 56699432  | Eif4g1   | 1600 | 176   | Viral myocarditis; RNA transport                                                                                                                                                                                                                                | 85.6  | 90.3  | 83.7  | 86.3  | 116   | 114.6 | 121.7 | 121   |
| 124486895 | Pgd      | 483  | 53.2  | Glutathione metabolism; Metabolic pathways; Pentose phosphate pathway; Carbon metabolism                                                                                                                                                                        | 97.6  | 93.5  | 97.6  | 100.4 | 94.3  | 97.2  | 93    | 91.5  |
| 58037267  | Pdia6    | 445  | 48.7  | Protein processing in endoplasmic reticulum                                                                                                                                                                                                                     | 70    | 70.7  | 75.3  | 71.9  | 136.8 | 136   | 133.9 | 136.3 |
| 33859686  | Pgm1     | 620  | 68.7  | Metabolic pathways; Amino sugar and nucleotide sugar metabolism; Purine metabolism; Starch and sucrose metabolism; Glycolysis / Gluconeogenesis; Pentose phosphate pathway; Galactose metabolism                                                                | 125   | 125.5 | 120.7 | 123.6 | 80.5  | 83.8  | 78.7  | 75    |
| 357527416 | Chd3     | 2055 | 232.6 |                                                                                                                                                                                                                                                                 | 109.5 | 112.1 | 111.4 | 112.2 | 94.8  | 89.7  | 87.9  | 86.4  |
| 205360918 | Igtp     | 423  | 48.5  | Toxoplasmosis                                                                                                                                                                                                                                                   | 77.6  | 76.6  | 74    | 73    | 145.6 | 145.2 | 133.2 | 132.2 |
| 10946928  | Hnrnp1   | 449  | 49.2  |                                                                                                                                                                                                                                                                 | 91.5  | 93.5  | 93.8  | 96.6  | 104.9 | 109.6 | 97.8  | 95.5  |
| 261878607 | Hnrnpf   | 415  | 45.7  |                                                                                                                                                                                                                                                                 | 104.5 | 103.6 | 99.1  | 97.9  | 91    | 88    | 92.5  | 93.8  |
| 13507656  | Erap1    | 930  | 106.5 |                                                                                                                                                                                                                                                                 | 95.2  | 96.9  | 89.4  | 90.2  | 105   | 108.1 | 95.3  | 90.2  |
| 31981916  | Zap70    | 618  | 70.1  | T cell receptor signaling pathway; Primary immunodeficiency; Ras signaling pathway; NF-kappa B signaling pathway; Natural killer cell mediated cytotoxicity; Th1 and Th2 cell differentiation                                                                   | 97    | 97.2  | 95    | 95.2  | 99.2  | 100.2 | 96.8  | 95.7  |

|           |          |      |       |                                                                                                                                                                                      |       |       |       |       |       |       |       |       |
|-----------|----------|------|-------|--------------------------------------------------------------------------------------------------------------------------------------------------------------------------------------|-------|-------|-------|-------|-------|-------|-------|-------|
| 22267442  | Uqcr2    | 453  | 48.2  | Metabolic pathways; Huntington's disease; Non-alcoholic fatty liver disease (NAFLD); Oxidative phosphorylation; Parkinson's disease; Alzheimer's disease; Cardiac muscle contraction | 108.2 | 107.8 | 108.5 | 109.8 | 94.9  | 96.8  | 96.4  | 93.6  |
| 13385878  | Snx2     | 519  | 58.4  | Endocytosis                                                                                                                                                                          | 109.9 | 110.9 | 101.6 | 102.5 | 95.8  | 93.2  | 93.2  | 91.2  |
| 30425250  | Actbl2   | 376  | 42    |                                                                                                                                                                                      | 80    | 86.2  | 123.9 | 121.9 | 117.7 | 99    | 78.8  | 59.3  |
| 130502228 | Rasal3   | 1041 | 114.7 | Ras signaling pathway                                                                                                                                                                | 107.4 | 103.8 | 109.3 | 111.3 | 92.8  | 91.7  | 89.6  | 85.2  |
| 13385624  | Eif2s1   | 315  | 36.1  | Herpes simplex infection; Non-alcoholic fatty liver disease (NAFLD); Influenza A; Hepatitis C; RNA transport; Protein processing in endoplasmic reticulum; Measles;                  | 86.5  | 85.9  | 82.5  | 87.1  | 109.9 | 121.4 | 121.1 | 116   |
| 27881415  | Acap1    | 740  | 81.7  | Endocytosis                                                                                                                                                                          | 107.3 | 111   | 107.2 | 108.1 | 97.7  | 90    | 90.2  | 85.1  |
| 30794470  | Rsl1d1   | 452  | 50.4  |                                                                                                                                                                                      | 90.7  | 86.5  | 85.2  | 84.7  | 113   | 117.6 | 118.7 | 119.7 |
| 224922806 | Gpd2     | 727  | 80.9  | Glycerophospholipid metabolism                                                                                                                                                       | 100.5 | 101.5 | 103.9 | 101.4 | 103   | 102   | 93.7  | 96.6  |
| 194018529 | Gspt1    | 636  | 68.6  | mRNA surveillance pathway                                                                                                                                                            | 88.1  | 85.5  | 91.8  | 90.6  | 113.3 | 114.7 | 96.3  | 101   |
| 6678467   | Tuba4a   | 448  | 49.9  | Phagosome; Gap junction; Apoptosis                                                                                                                                                   | 102.4 | 101.4 | 102.8 | 103.3 | 94.2  | 98.3  | 100.2 | 101   |
| 86198316  | Pdia4    | 641  | 72.3  | Thyroid hormone synthesis; Protein processing in endoplasmic reticulum                                                                                                               | 91.9  | 92.1  | 90.4  | 89.3  | 112.2 | 111.7 | 100.4 | 99.7  |
| 6671569   | Rplp0    | 317  | 34.2  | Ribosome                                                                                                                                                                             | 87.6  | 87.9  | 89.1  | 87.9  | 108.2 | 109.9 | 105.7 | 103.5 |
| 51593084  | Smarca2  | 1583 | 180.6 |                                                                                                                                                                                      | 107.8 | 113.4 | 109.9 | 107.6 | 90.7  | 90.1  | 84.4  | 89.5  |
| 40068493  | Ddx17    | 652  | 72.5  |                                                                                                                                                                                      | 104.1 | 107.7 | 107.6 | 109.2 | 87.8  | 85.7  | 87.6  | 84.2  |
| 21426893  | Hist1h1b | 223  | 22.6  |                                                                                                                                                                                      | 93.9  | 93.5  | 117.2 | 117.7 | 86.7  | 85.3  | 91    | 90.4  |
| 62241030  | Dock8    | 2100 | 238.8 |                                                                                                                                                                                      | 102.3 | 103.3 | 100   | 101.3 | 98.8  | 99.4  | 94.1  | 93.4  |
| 6753060   | Anxa5    | 319  | 35.7  |                                                                                                                                                                                      | 128   | 129.3 | 122.7 | 122.6 | 69.7  | 68.8  | 82.2  | 82.8  |
| 211065507 | Dars     | 501  | 57.1  | Aminoacyl-tRNA biosynthesis                                                                                                                                                          | 92.9  | 100.4 | 97    | 93.7  | 107.6 | 108.9 | 97.4  | 97.9  |
| 13385998  | Trap1    | 706  | 80.2  |                                                                                                                                                                                      | 94.9  | 92    | 90.7  | 92.2  | 120.5 | 117.4 | 105.5 | 106.5 |
| 93102417  | Gars     | 729  | 81.8  | Aminoacyl-tRNA biosynthesis                                                                                                                                                          | 79.1  | 78.5  | 78.9  | 75.9  | 120.4 | 128.6 | 121.9 | 120   |
| 19705424  | Psmd3    | 530  | 60.7  | Proteasome; Epstein-Barr virus infection                                                                                                                                             | 93.9  | 89.7  | 90.4  | 90.7  | 105.6 | 109   | 105.6 | 102.2 |
| 146231996 | Huwl     | 4378 | 482.4 | Ubiquitin mediated proteolysis                                                                                                                                                       | 103.5 | 99.8  | 98    | 99.3  | 93.8  | 98.2  | 101.3 | 100.8 |
| 227116266 | Exosc10  | 887  | 100.9 | RNA degradation                                                                                                                                                                      | 102.7 | 108.2 | 101.6 | 101.8 | 105   | 100.9 | 98.1  | 100   |
| 31980798  | Nxf1     | 618  | 70.3  |                                                                                                                                                                                      | 99.1  | 103.2 | 99.5  | 96.8  | 106.8 | 103.4 | 94.6  | 96.3  |
| 9055218   | Prpf40a  | 953  | 108.4 | Spliceosome                                                                                                                                                                          | 94.9  | 98.4  | 95.8  | 96.7  | 99.7  | 99.6  | 104.9 | 104.3 |
| 158853999 | Inpp5d   | 1191 | 133.5 | B cell receptor signaling pathway; Fc gamma R-mediated phagocytosis; Inositol phosphate metabolism; Fc epsilon RI signaling pathway; Phosphatidylinositol signaling system           | 110.1 | 109.1 | 106.2 | 106.3 | 87.5  | 90.3  | 96.8  | 96.2  |
| 84662730  | Fubp1    | 642  | 67.4  |                                                                                                                                                                                      | 105.8 | 108.2 | 100.2 | 101.1 | 97.9  | 96.5  | 101.6 | 101.3 |
| 124486949 | Trrap    | 3847 | 435.5 | HTLV-I infection                                                                                                                                                                     | 106.4 | 102.8 | 99.3  | 101.5 | 99.5  | 100.9 | 96.1  | 97.7  |
| 270309161 | Pded4    | 469  | 51.7  | MicroRNAs in cancer; Proteoglycans in cancer                                                                                                                                         | 129.4 | 126.2 | 137.2 | 133.1 | 64    | 68.1  | 66.5  | 66.8  |
| 282398108 | Rpn1     | 608  | 68.5  | Metabolic pathways; N-Glycan biosynthesis; Protein processing in endoplasmic reticulum                                                                                               | 92.8  | 91.8  | 90.2  | 90.9  | 118.5 | 113.6 | 98.1  | 103.8 |
| 125660464 | Dock11   | 2073 | 237.6 |                                                                                                                                                                                      | 104.5 | 104.1 | 101   | 101.6 | 94.1  | 91.8  | 91    | 92.3  |

|           |                 |      |       |                                                                                                                                                       |       |       |       |       |       |       |       |       |
|-----------|-----------------|------|-------|-------------------------------------------------------------------------------------------------------------------------------------------------------|-------|-------|-------|-------|-------|-------|-------|-------|
| 226958589 | Polr2b          | 1174 | 133.8 | RNA polymerase; Epstein-Barr virus infection; Metabolic pathways; Purine metabolism; Huntington's disease; Pyrimidine metabolism                      | 101.9 | 100   | 104.7 | 103   | 104.3 | 106.8 | 95.1  | 92    |
| 118601009 | Pnkp            | 522  | 57.2  |                                                                                                                                                       | 107.5 | 108.8 | 103.7 | 106   | 88.9  | 89    | 91.9  | 91.9  |
| 6755566   | Slc9a3r1        | 355  | 38.6  |                                                                                                                                                       | 119.3 | 117.6 | 119.2 | 117.5 | 82.3  | 81.7  | 81.7  | 84.5  |
| 116089273 | Gdi2            | 445  | 50.5  |                                                                                                                                                       | 108.4 | 108.6 | 105.2 | 103.7 | 92.4  | 91.6  | 93.5  | 92.9  |
| 6679793   | Ppm1g           | 542  | 58.7  |                                                                                                                                                       | 99.9  | 101.9 | 98.1  | 100.1 | 96.1  | 96.2  | 104.4 | 103.4 |
| 112363072 | Arpc2           | 300  | 34.3  | Endocytosis; Regulation of actin cytoskeleton; Salmonella infection; Fc gamma R-mediated phagocytosis; Bacterial invasion of epithelial cells         | 104.8 | 103   | 107   | 105.6 | 87.3  | 87.9  | 90.8  | 93.6  |
| 74315975  | Psm1            | 953  | 105.7 | Proteasome; Epstein-Barr virus infection                                                                                                              | 94.3  | 93.3  | 89.3  | 90.1  | 104.9 | 105.7 | 113.8 | 113.9 |
| 261823966 | Zfml;<br>Zfp638 | 1926 | 214.3 |                                                                                                                                                       | 105.6 | 103.9 | 103.2 | 101.9 | 95.5  | 97.5  | 93.7  | 99.2  |
| 29788764  | Adsl            | 484  | 54.8  | Metabolic pathways; Purine metabolism; Alanine, aspartate and glutamate metabolism                                                                    | 103.5 | 103.3 | 94.1  | 92.5  | 95.6  | 95.6  | 105.8 | 104.4 |
| 6671549   | Prdx6           | 224  | 24.8  | Metabolic pathways                                                                                                                                    | 112.6 | 109.6 | 114.9 | 116.5 | 78.6  | 79    | 88.9  | 92    |
| 226958349 | Tpi1            | 299  | 32.2  | Metabolic pathways; Biosynthesis of amino acids; Glycolysis / Gluconeogenesis; Inositol phosphate metabolism; Carbon metabolism; Fructose and mannose | 85.3  | 89.8  | 92    | 90.9  | 108.7 | 105.9 | 110.9 | 106.7 |
| 6754744   | Msh6            | 1358 | 151   | Platinum drug resistance; Pathways in cancer; Colorectal cancer; Mismatch repair                                                                      | 91.7  | 91.8  | 86.5  | 89.5  | 115.4 | 114.9 | 109.2 | 106   |
| 62243815  | Sltm            | 1031 | 116.9 |                                                                                                                                                       | 111.4 | 104.6 | 106.6 | 111.9 | 89.1  | 89.7  | 90.9  | 97.4  |
| 40254525  | Tpm3            | 284  | 33.1  |                                                                                                                                                       | 119.6 |       | 111   |       | 87.2  |       | 76.1  |       |
| 226062635 | Rangap1         | 589  | 63.5  | RNA transport                                                                                                                                         | 91.5  | 91.4  | 91.9  | 89.5  | 105.5 | 108.1 | 113.2 | 116.4 |
| 33239431  | Rcc2            | 520  | 55.9  |                                                                                                                                                       | 101.1 | 101.2 | 99.9  | 101.1 | 102.3 | 101.7 | 92    | 87.6  |
| 21539655  | Prpf6           | 941  | 106.7 | Spliceosome                                                                                                                                           | 100.4 | 98.7  | 94.8  | 94.2  | 101.3 | 100.9 | 105.7 | 103.8 |
| 31560656  | Pabpc1          | 636  | 70.6  | mRNA surveillance pathway; RNA degradation; RNA transport                                                                                             | 76.7  | 76    | 80.6  | 80.1  | 121.3 | 125.6 | 115.2 | 111.3 |
| 31712002  | Ecd4            | 1390 | 150.6 |                                                                                                                                                       | 93    | 95.6  | 96.2  | 97    | 110.5 | 109.2 | 107.5 | 108.2 |
| 91932791  | Trip12          | 2025 | 224   | Ubiquitin mediated proteolysis                                                                                                                        | 99.9  | 102.7 | 97.7  | 94.8  | 101.1 | 99.2  | 95.2  | 95    |
| 51889716  | Utp14a          | 767  | 87.2  | Ribosome biogenesis in eukaryotes                                                                                                                     | 91.2  | 91.4  | 89    | 91.9  | 110.6 | 110.9 | 117.8 | 114.5 |
| 22779899  | Cdc5l           | 802  | 92.1  | Spliceosome                                                                                                                                           | 98    | 98.3  | 100.5 | 99.9  | 99.5  | 99.6  | 95.8  | 98.4  |
| 37674277  | Hnrnpa3         | 379  | 39.6  | Spliceosome                                                                                                                                           | 93    | 92.9  | 103.7 | 108.1 | 99.8  | 97.3  | 98.2  | 94.8  |
| 85838509  | Sh3bp1          | 582  | 64.4  |                                                                                                                                                       | 111.1 | 111.3 | 109.4 | 109.1 | 81.6  | 83.1  | 88.4  | 89.4  |
| 158508460 | Ahctf1          | 2243 | 247.5 |                                                                                                                                                       | 100.6 | 100.2 | 99.7  | 98.9  | 102.4 | 100.6 | 101.4 | 102   |
| 148277024 | Sept1           | 366  | 42    | Bacterial invasion of epithelial cells                                                                                                                | 95.2  | 96.6  | 97.7  | 98.3  | 95.7  | 96.2  | 95.5  | 96    |
| 285402659 | Rnh1            | 492  | 53.9  |                                                                                                                                                       | 112.1 | 107.2 | 106.1 | 101.6 | 93.9  | 93.7  | 86.6  | 97.5  |
| 254588102 | Nup153          | 1462 | 151.9 | RNA transport                                                                                                                                         | 99    | 103.3 | 101.1 | 98.1  | 104.5 | 102.2 | 103.1 | 106.4 |
| 61657921  | Kif5b           | 963  | 109.5 | Endocytosis; Dopaminergic synapse                                                                                                                     | 99.7  | 98.2  | 97.1  | 96.2  | 102.3 | 96.7  | 107.4 | 105.5 |
| 8567338   | Copg;<br>Copp1  | 874  | 97.5  |                                                                                                                                                       | 94.7  | 96.3  | 95.3  | 95.5  | 102.2 | 106.3 | 99.7  | 104.6 |
| 30519911  | Tagln2          | 199  | 22.4  |                                                                                                                                                       | 132.8 | 135.6 | 116.8 | 119.6 | 74.9  | 71.3  | 75    | 72.4  |

|           |                  |      |       |                                                                                                                                                                                                                                                                 |       |       |       |       |       |       |       |       |
|-----------|------------------|------|-------|-----------------------------------------------------------------------------------------------------------------------------------------------------------------------------------------------------------------------------------------------------------------|-------|-------|-------|-------|-------|-------|-------|-------|
| 6678419   | Tpp2             | 1262 | 139.8 |                                                                                                                                                                                                                                                                 | 94.5  | 90.6  | 92.3  | 94.1  | 107.7 | 114.7 | 98.5  | 104.8 |
| 244790127 | Arhgap4          | 955  | 106.4 |                                                                                                                                                                                                                                                                 | 114.9 | 111.5 | 111.6 | 117.3 | 81.5  | 87.2  | 86.1  | 78.5  |
| 409971427 | Birc6            | 4873 | 530.7 | Ubiquitin mediated proteolysis; Apoptosis - multiple species                                                                                                                                                                                                    | 103.5 | 103   | 95.8  | 92.5  | 98.9  | 101.4 | 105   | 107   |
| 24418931  | Dnttip2          | 758  | 84.2  |                                                                                                                                                                                                                                                                 | 95.3  | 101.4 | 97.4  | 96.5  | 101.4 | 101.7 | 112.2 | 112.4 |
| 117606364 | Nfkb1            | 971  | 105.5 | Acute myeloid leukemia; AGE-RAGE signaling pathway in diabetic complications; Herpes simplex infection; Chagas disease (American trypanosomiasis); T cell receptor signaling pathway; MAPK signaling pathway; MicroRNAs in cancer: Ras signaling pathway; Prola | 90    | 88    | 85.9  | 83.7  | 116   | 114   | 113.2 | 123   |
| 34486094  | Eif4g2           | 906  | 102.1 | Viral myocarditis; RNA transport                                                                                                                                                                                                                                | 96.8  | 99.1  | 92.1  | 90.2  | 109.1 | 106.8 | 103.6 | 100.7 |
| 38198665  | Nsfl1c           | 372  | 40.9  |                                                                                                                                                                                                                                                                 | 104.9 | 107   | 104   | 105.1 | 98.1  | 96.3  | 112   | 110.8 |
| 31543349  | Nsf              | 744  | 82.6  | GABAergic synapse; Vasopressin-regulated water reabsorption; Synaptic vesicle cycle                                                                                                                                                                             | 101.3 | 102.3 | 105.2 | 105.5 | 97.1  | 93.7  | 97.6  | 97.3  |
| 41152116  | Lrrc47           | 581  | 63.6  |                                                                                                                                                                                                                                                                 | 105.7 | 104.9 | 104.5 | 106.9 | 97.4  | 95.9  | 94.3  | 91.8  |
| 38372907  | Ddx39            | 427  | 49    |                                                                                                                                                                                                                                                                 | 96.5  | 99.3  | 96.9  | 98.2  | 99.6  | 99.6  | 101.3 | 98.7  |
| 281604100 | Sbfl             | 1893 | 211.3 |                                                                                                                                                                                                                                                                 | 106.9 | 108.2 | 104.1 | 100.4 | 100   | 96.7  | 95.7  | 92.6  |
| 158636012 | Ssb              | 415  | 47.7  | Systemic lupus erythematosus                                                                                                                                                                                                                                    | 93.9  | 93.3  | 100.5 | 102.6 | 102.8 | 102   | 97.7  | 96.2  |
| 27754056  | Tubb6            | 447  | 50.1  | Phagosome; Gap junction                                                                                                                                                                                                                                         |       |       |       |       |       |       |       |       |
| 86198329  | Nolc1            | 702  | 73.7  |                                                                                                                                                                                                                                                                 | 82    | 77.9  | 81.2  | 82.1  | 121.9 | 126.9 | 133.4 | 140.5 |
| 254553321 | Rps3a;<br>Rps3a1 | 264  | 29.9  | Ribosome                                                                                                                                                                                                                                                        | 89.4  | 93.4  | 87.4  | 87.8  | 111.6 | 109.9 | 120.4 | 117.8 |
| 124249354 | Sp100            | 591  | 68.1  |                                                                                                                                                                                                                                                                 | 110.8 | 108.7 | 115.3 | 114.6 | 80    | 82.5  | 79.6  | 78    |
| 8394460   | Tmod3            | 352  | 39.5  |                                                                                                                                                                                                                                                                 | 106.7 | 106.7 | 101   | 100.8 | 90.6  | 91.3  | 95.2  | 97.1  |
| 51491880  | Mta2             | 668  | 75    |                                                                                                                                                                                                                                                                 | 104.1 | 103.2 | 96.3  | 96.3  | 99.3  | 97.9  | 99.6  | 99.7  |
| 226823367 | Fh1              | 507  | 54.3  | Pyruvate metabolism; Citrate cycle (TCA cycle); Metabolic pathways; Pathways in cancer; Renal cell carcinoma; Carbon metabolism                                                                                                                                 | 92.3  | 91.7  | 95.3  | 95    | 105.2 | 105.8 | 110.2 | 112.6 |
| 61102728  | Itrp3            | 2670 | 304.1 | Oxytocin signaling pathway; Cholinergic synapse; Retrograde endocannabinoid signaling; Pancreatic secretion; Dopaminergic synapse; NOD-like receptor signaling pathway; Long-term potentiation; Platelet activation; Thyroid hormone synthesis; Oocyte meiosis; | 114.3 | 114.8 | 109.6 | 111   | 88.3  | 88.4  | 83.7  | 84.2  |
| 160333282 | Pml              | 885  | 98.2  | Acute myeloid leukemia; Endocytosis; Herpes simplex infection; Ubiquitin mediated proteolysis; Transcriptional misregulation in cancer: Pathways in cancer: Influenza A                                                                                         | 111.6 | 110.4 | 100.8 | 105.2 | 91    | 91    | 88.1  | 87.2  |
| 9789997   | Letm1            | 738  | 82.9  |                                                                                                                                                                                                                                                                 | 105.7 | 111.2 | 115.4 | 113   | 95.2  | 96.5  | 92.1  | 90.7  |
| 356995868 | Ddx39b           | 428  | 49    | mRNA surveillance pathway; Spliceosome; Influenza A; RNA transport                                                                                                                                                                                              | 104.4 | 106.6 | 102.5 | 105.4 | 86.6  | 86.6  | 93.6  | 93    |
| 162417949 | Lrrfip1          | 729  | 79.2  |                                                                                                                                                                                                                                                                 | 112.3 | 113.2 | 116.1 | 115.1 | 84.8  | 80.3  | 93.7  | 94    |
| 33598964  | Myh10            | 1976 | 228.9 | Regulation of actin cytoskeleton; Tight junction                                                                                                                                                                                                                | 106.3 | 127.2 | 101.4 | 89.9  | 90.3  | 94.4  | 85    | 101.7 |
| 45544618  | Mtap             | 283  | 31    | Metabolic pathways; Cysteine and methionine metabolism                                                                                                                                                                                                          | 107.2 | 104.4 | 107.7 | 107.7 | 97.1  | 97.6  | 93.2  | 93.5  |
| 255308899 | Rpl3             | 403  | 46.1  | Ribosome                                                                                                                                                                                                                                                        | 82.3  | 85.8  | 90.3  | 90.7  | 116.3 | 119.7 | 111.8 | 108.4 |

|           |                             |      |       |                                                                                                                                                                                                             |       |       |       |       |       |       |       |       |
|-----------|-----------------------------|------|-------|-------------------------------------------------------------------------------------------------------------------------------------------------------------------------------------------------------------|-------|-------|-------|-------|-------|-------|-------|-------|
| 21312256  | Dcps                        | 338  | 39    | RNA degradation                                                                                                                                                                                             | 111.4 | 110.6 | 111.7 | 110   | 90.5  | 89.5  | 83.3  | 90.6  |
| 27754103  | Psmc6                       | 389  | 44.1  | Proteasome; Epstein-Barr virus infection                                                                                                                                                                    | 96.1  | 96    | 92.3  | 90.2  | 115.5 | 113.8 | 81.5  | 90.5  |
| 39930335  | Abcf1                       | 837  | 94.9  |                                                                                                                                                                                                             | 91    | 95.1  | 86.3  | 89.6  | 107.4 | 101.6 | 112.2 | 117.1 |
| 119392074 | Glyr1                       | 552  | 60.4  |                                                                                                                                                                                                             | 100.8 | 110.6 | 117.6 | 110.6 | 93.3  | 86.3  | 92    | 97.2  |
| 77404392  | Snd1                        | 910  | 102   | Epstein-Barr virus infection; Viral carcinogenesis                                                                                                                                                          | 87.9  | 84.7  | 83.7  | 83.8  | 118.4 | 116.7 | 113.7 | 113.5 |
| 19527168  | Psip1                       | 528  | 59.7  |                                                                                                                                                                                                             | 107   | 100.8 | 107.4 | 105.5 | 88    | 90.7  | 93    | 98.6  |
| 30794450  | Rpl4                        | 419  | 47.1  | Ribosome                                                                                                                                                                                                    | 86.4  | 84.9  | 91.7  | 89.4  | 106.4 | 107.5 | 117   | 116.5 |
| 176865892 | Eif4a2                      | 407  | 46.4  | RNA transport                                                                                                                                                                                               | 125.6 | 111.2 | 130.1 | 122.2 | 78.7  | 75.2  | 80.5  | 77.4  |
| 157041229 | Pcbp2                       | 362  | 38.2  |                                                                                                                                                                                                             | 91.7  | 95.5  | 86.8  | 91.7  | 103.3 | 103.7 | 112.2 | 105.9 |
| 33620739  | Myl6                        | 151  | 17    |                                                                                                                                                                                                             | 99.2  | 102.6 | 107.8 | 103.3 | 93.5  | 96.6  | 90.3  | 94    |
| 291327528 | Pcbp2                       | 322  | 33.9  |                                                                                                                                                                                                             |       | 114.8 |       | 128.3 |       | 83.7  |       | 104.7 |
| 91064867  | Dkc1                        | 509  | 57.4  | Ribosome biogenesis in eukaryotes                                                                                                                                                                           | 110.5 | 110.8 | 105.7 | 106.7 | 94.1  | 93.1  | 93    | 94.5  |
| 254540027 | Mdh1                        | 334  | 36.5  | Pyruvate metabolism; Citrate cycle (TCA cycle); Metabolic pathways; Cysteine and methionine metabolism; Proximal tubule bicarbonate reclamation; Carbon metabolism; Glyoxylate and dicarboxylate metabolism | 116.2 | 118   | 126.1 | 126.7 | 80.9  | 81    | 83.9  | 82.9  |
| 25141233  | Matr3                       | 846  | 94.6  |                                                                                                                                                                                                             | 102.7 | 104.2 | 96.9  | 101   | 105.2 | 99.3  | 98    | 98    |
| 23956214  | Sfpq                        | 699  | 75.4  |                                                                                                                                                                                                             | 98.8  | 99.3  | 98.1  | 98.8  | 98.4  | 96.7  | 100.5 | 99.5  |
| 6755210   | Psm13                       | 376  | 42.8  | Proteasome; Epstein-Barr virus infection                                                                                                                                                                    | 91.3  | 91.9  | 86.6  | 91.5  | 108.8 | 108   | 111.8 | 109.5 |
| 244791271 | Sec31a                      | 1230 | 133.5 | Protein processing in endoplasmic reticulum                                                                                                                                                                 | 98.5  | 96.4  | 97.1  | 95.5  | 100.1 | 100.5 | 100.9 | 104.1 |
| 153945866 | Safb2                       | 991  | 111.8 |                                                                                                                                                                                                             | 107.9 | 102.7 | 105.1 | 105.5 | 93.9  | 94.8  | 91.6  | 93.4  |
| 37718970  | AI314180                    | 1840 | 203.6 |                                                                                                                                                                                                             | 91.4  | 95.7  | 88.1  | 84.8  | 115.3 | 115.6 | 112.2 | 112.6 |
| 6680836   | Calr                        | 416  | 48    | Chagas disease (American trypanosomiasis); HTLV-I infection; Phagosome; Antigen processing and presentation; Protein processing in endoplasmic reticulum                                                    | 89.8  | 87.6  | 89.3  | 90.1  | 106.7 | 106   | 106.7 | 107.5 |
| 33859560  | Gdi1                        | 447  | 50.5  |                                                                                                                                                                                                             | 114.6 | 117.5 | 117.2 | 114.6 | 89.7  | 89.1  | 87.7  | 90.1  |
| 283046753 | Mndal                       | 538  | 60.5  |                                                                                                                                                                                                             | 111.3 | 109.7 | 108.7 | 107.3 | 79.9  | 85.4  | 87.2  | 89.3  |
| 226958577 | 2610301G<br>19Rik;<br>Ccar2 | 922  | 102.9 |                                                                                                                                                                                                             | 109.7 | 105.2 | 97.5  | 91.2  | 89.7  | 89.9  | 98.2  | 101.8 |
| 148747331 | Coro7                       | 922  | 100.7 |                                                                                                                                                                                                             | 115.9 | 103.5 | 108.4 | 99.3  | 82.4  | 80.8  | 89.3  | 117.3 |
| 226823359 | Copa                        | 1224 | 138.3 |                                                                                                                                                                                                             | 93.6  | 94    | 95.1  | 95.5  | 108.2 | 105.8 | 93.5  | 97.9  |
| 162138894 | Farsa                       | 508  | 57.6  | Aminoacyl-tRNA biosynthesis                                                                                                                                                                                 | 96.9  | 97.5  | 93.4  | 94.3  | 100.5 | 101.6 | 106.7 | 103.6 |
| 47894398  | Tpm4                        | 248  | 28.5  | Hypertrophic cardiomyopathy (HCM); Dilated cardiomyopathy; Cardiac muscle contraction; Adrenergic signaling in cardiomyocytes                                                                               | 107.9 | 107.8 | 96.3  | 99.6  | 95.3  | 93.2  | 112.6 | 111.6 |
| 31981382  | Impdh2                      | 514  | 55.8  | Metabolic pathways; Purine metabolism; Drug metabolism - other enzymes                                                                                                                                      | 77.1  | 75    | 75.4  | 73.2  | 128.3 | 131.5 | 123.9 | 132.4 |
| 6755198   | Psm6                        | 246  | 27.4  | Proteasome                                                                                                                                                                                                  | 99.6  | 99.5  | 98.3  | 97.4  | 98.8  | 98.5  | 95.6  | 96.1  |
| 407261714 | Eef1a1;<br>LOC1010<br>56619 | 462  | 50.1  | Legionellosis; RNA transport                                                                                                                                                                                | 75.5  | 77.1  | 91.8  | 87.9  | 112.9 | 113.1 | 110.4 | 115.8 |



|           |               |      |       |                                                                                                                                          |       |       |       |       |       |       |       |       |
|-----------|---------------|------|-------|------------------------------------------------------------------------------------------------------------------------------------------|-------|-------|-------|-------|-------|-------|-------|-------|
| 254553372 | Iars          | 1262 | 144.2 | Aminoacyl-tRNA biosynthesis                                                                                                              | 74.8  | 72.8  | 71.7  | 68.9  | 132.6 | 132.5 | 138   | 136.9 |
| 31981273  | Cndp2         | 475  | 52.7  | Histidine metabolism; Arginine and proline metabolism; Metabolic pathways; beta-Alanine metabolism                                       | 91.1  | 88.3  | 102.7 | 101.5 | 105.3 | 103.8 | 106.5 | 109.6 |
| 255958294 | Aldh18a1      | 793  | 87    |                                                                                                                                          | 78.7  | 79.3  | 77.5  | 75.8  | 134.2 | 130.8 | 123.1 | 121.7 |
| 255958292 | Aldh18a1      | 795  | 87.2  | Arginine and proline metabolism; Metabolic pathways; Biosynthesis of amino acids                                                         | 89.4  | 78.7  | 77    | 74.9  | 123.5 | 126.8 | 122.5 | 137.2 |
| 33563236  | Arhgdib       | 200  | 22.8  | Neurotrophin signaling pathway; Vasopressin-regulated water reabsorption                                                                 | 122.6 | 124.6 | 137   | 139   | 62.9  | 58.1  | 71.7  | 69.6  |
| 6679501   | Psmc1         | 440  | 49.2  | Proteasome; Epstein-Barr virus infection; viral oncogenesis                                                                              | 91.9  | 92    | 91.8  | 89.2  | 111.3 | 112.5 | 103.5 | 104   |
| 154091016 | Atrx          | 2476 | 278.4 |                                                                                                                                          | 101   | 100.9 | 101.7 | 100.9 | 96.8  | 98.7  | 105.4 | 105.9 |
| 110431378 | Utnr1         | 3430 | 392.5 |                                                                                                                                          | 95.4  | 96.1  | 91.6  | 92.9  | 105.4 | 104   | 110.2 | 104.2 |
| 31982233  | Mtdh          | 579  | 63.8  |                                                                                                                                          | 94.6  | 95.9  | 89.6  | 89.1  | 107.3 | 107.2 | 115   | 114.4 |
| 266458101 | Myo1g         | 1024 | 117.2 |                                                                                                                                          | 109.9 | 106   | 105.7 | 111.2 | 95.3  | 94.8  | 87.8  | 86.7  |
| 254826765 | Satb1         | 764  | 85.8  |                                                                                                                                          | 93    | 96.2  | 95.1  | 93    | 94.5  | 96.3  | 95.7  | 98    |
| 51491852  | Mars          | 902  | 101.4 | Selenocompound metabolism; Aminoacyl-tRNA biosynthesis                                                                                   | 92.4  | 91.2  | 88.4  | 86.2  | 118.2 | 118.3 | 118.2 | 118.9 |
| 6755224   | Twf2          | 349  | 39.4  |                                                                                                                                          | 118.7 | 116.5 | 120.3 | 122   | 77.4  | 80.7  | 78    | 78.6  |
| 112421097 | Smarcc1       | 1104 | 122.8 |                                                                                                                                          | 88.7  | 89    | 83.1  | 83.6  | 120.7 | 117.8 | 121.4 | 114.7 |
| 113205057 | Ubt1          | 764  | 89.4  |                                                                                                                                          | 101.2 | 99.9  | 98.9  | 97    | 94.8  | 95.1  | 101.5 | 98.8  |
| 256000788 | Tpm1          | 248  | 28.5  |                                                                                                                                          | 123.8 |       | 96    |       | 96.5  |       | 106.2 |       |
| 6678832   | Mcm6          | 821  | 92.8  | DNA replication; Cell cycle                                                                                                              | 72.7  | 71.4  | 72.3  | 69.4  | 134.8 | 134.6 | 133.2 | 128.6 |
| 6754722   | Grap2         | 322  | 36.8  | T cell receptor signaling pathway                                                                                                        | 116   | 113.2 | 119.3 | 119.4 | 78.9  | 82.5  | 74.2  | 79.1  |
| 17933766  | Elmo1         | 727  | 83.9  | Chemokine signaling pathway; Bacterial invasion of epithelial cells                                                                      | 101.4 | 104.2 | 101.6 | 100.6 | 95.3  | 92.1  | 89.6  | 89.6  |
| 83745120  | Rplp2         | 115  | 11.6  | Ribosome                                                                                                                                 | 88.9  | 94.3  | 94.4  | 98.7  | 104   | 97.2  | 112.6 | 111.8 |
| 113205053 | Ubt1          | 727  | 85    |                                                                                                                                          | 112.7 | 113.2 | 105.2 | 102.7 | 79.7  | 78.4  | 90.1  | 96.5  |
| 459683864 | Hnrnp35       | 632  | 70.8  |                                                                                                                                          | 100.7 | 100.6 | 101.4 | 102.2 | 92    | 91.9  | 96.9  | 96.3  |
| 118130785 | Ptpn6         | 597  | 67.7  |                                                                                                                                          | 96.2  | 94.8  | 110.3 | 111.3 | 99    | 100.4 | 99.5  | 96.7  |
| 165972309 | Suclg2        | 433  | 46.8  | Citrate cycle (TCA cycle); Metabolic pathways; Propanoate metabolism; Carbon metabolism                                                  | 120.4 | 120.3 | 112.7 | 114   | 85.3  | 92.1  | 94.4  | 92.6  |
| 6681183   | Diap1; Diaph1 | 1255 | 139.3 | AGE-RAGE signaling pathway in diabetic complications; Regulation of actin cytoskeleton; Focal adhesion                                   | 107.5 | 99.5  | 106   | 98.6  | 96.9  | 96.1  | 95.7  | 100.5 |
| 158517940 | Wdr36         | 899  | 99.7  | Ribosome biogenesis in eukaryotes                                                                                                        | 92.6  | 88.6  | 87.6  | 83.1  | 116.9 | 118   | 114.9 | 118.7 |
| 126723336 | Phb2          | 299  | 33.3  |                                                                                                                                          | 96    | 88.8  | 90.9  | 92.1  | 107.3 | 113.9 | 114.5 | 115.1 |
| 308153287 | Rcc1          | 434  | 46.3  |                                                                                                                                          | 104.2 | 101.8 | 100.4 | 102.8 | 103.3 | 101.6 | 103.1 | 103.5 |
| 30061353  | Hist3h2a      | 130  | 14.1  | Alcoholism; Systemic lupus erythematosus                                                                                                 | 98.8  | 92.9  | 99.1  | 116   | 71    | 81.8  | 132.8 | 103.4 |
| 160333216 | Canx          | 591  | 67.2  | HTLV-I infection; Thyroid hormone synthesis; Phagosome; Antigen processing and presentation; Protein processing in endoplasmic reticulum | 88.8  | 88.1  | 86.2  | 83.9  | 117.8 | 114.7 | 94.7  | 106   |
| 215983062 | Ehd3          | 535  | 60.8  | Endocytosis                                                                                                                              | 108.7 | 110.2 | 112.6 | 110.3 | 87.7  | 83.4  | 79.1  | 79.3  |
| 170784834 | Eps15l1       | 907  | 99.2  | Endocytosis                                                                                                                              | 106.2 | 104   | 100.2 | 100.3 | 96.2  | 99    | 96.5  | 97.3  |
| 31560110  | Gtbbp4        | 634  | 74.1  | Ribosome biogenesis in eukaryotes                                                                                                        | 92.4  | 95.1  | 92    | 93.3  | 110   | 108   | 110.1 | 110.8 |

|           |                             |      |       |                                                                                                                                                                                                                                                                 |       |       |       |       |       |       |       |       |
|-----------|-----------------------------|------|-------|-----------------------------------------------------------------------------------------------------------------------------------------------------------------------------------------------------------------------------------------------------------------|-------|-------|-------|-------|-------|-------|-------|-------|
| 6753882   | Fkbp4                       | 458  | 51.5  | Estrogen signaling pathway                                                                                                                                                                                                                                      | 96.4  | 98.1  | 92.3  | 92.6  | 108.5 | 106.1 | 110.8 | 108.4 |
| 56605979  | Btf3                        | 204  | 22    |                                                                                                                                                                                                                                                                 | 87.8  | 88.2  | 91.5  | 93.2  | 115.3 | 108   | 126.8 | 122.6 |
| 226874906 | Ywhae                       | 255  | 29.2  | Epstein-Barr virus infection; Hippo signaling pathway; Oocyte meiosis; Neurotrophin signaling pathway; Cell cycle: PI3K-Akt signaling pathway; Viral carcinogenesis                                                                                             | 96.2  | 96.4  | 97.4  | 96.7  | 99.7  | 98.9  | 100.6 | 107.5 |
| 14389431  | Stip1                       | 543  | 62.5  | Prion diseases                                                                                                                                                                                                                                                  | 103.4 | 102.5 | 98.5  | 97.8  | 101.8 | 103.7 | 97.5  | 99.9  |
| 244791124 | Dpp3                        | 738  | 82.8  |                                                                                                                                                                                                                                                                 | 105   | 105.4 | 100.9 | 100.9 | 92.8  | 92.7  | 96.3  | 96.2  |
| 38142460  | Etfb                        | 255  | 27.6  |                                                                                                                                                                                                                                                                 | 103.6 | 104   | 109.7 | 107.3 | 103.8 | 106.6 | 91.2  | 86.3  |
| 228008337 | Psmc3                       | 442  | 49.5  | Proteasome; Epstein-Barr virus infection                                                                                                                                                                                                                        | 89.2  | 91.8  | 86.8  | 86.2  | 109.7 | 110.9 | 111.7 | 108.8 |
| 145587104 | Xrcc6                       | 608  | 69.4  | Non-homologous end-joining                                                                                                                                                                                                                                      | 97.5  | 96.5  | 90    | 90.8  | 96.8  | 99.4  | 104.4 | 105.2 |
| 70778897  | Gtpbp1                      | 668  | 72.3  |                                                                                                                                                                                                                                                                 | 99.6  | 102   | 102.7 | 102.8 | 101.3 | 102.3 | 95.3  | 93.3  |
| 7106331   | H2afx                       | 143  | 15.1  | Alcoholism; Systemic lupus erythematosus                                                                                                                                                                                                                        | 98.3  | 96.7  | 124.7 | 125.6 | 100.1 | 97.8  | 78.7  | 78.9  |
| 83582811  | Arhgap25                    | 648  | 73.3  |                                                                                                                                                                                                                                                                 | 111.8 | 110.6 | 108.3 | 106.1 | 86.3  | 86.4  | 86.1  | 85    |
| 6755995   | Wdr1                        | 606  | 66.4  |                                                                                                                                                                                                                                                                 | 116.3 | 118   | 122.4 | 122.2 | 81.8  | 78.6  | 79.2  | 75.8  |
| 327365322 | U2af2                       | 475  | 53.5  | Spliceosome                                                                                                                                                                                                                                                     | 98.9  | 99.6  | 104.8 | 104.1 | 94.8  | 93.5  | 99.6  | 97.3  |
| 34328236  | Ubqln2                      | 638  | 67.3  | Protein processing in endoplasmic reticulum                                                                                                                                                                                                                     | 99.6  | 107   | 96.3  | 101.1 | 100.7 | 96.2  | 103.8 | 94.1  |
| 6679671   | Eps15                       | 897  | 98.4  | Endocytosis                                                                                                                                                                                                                                                     | 102.5 | 103.5 | 98.1  | 96.5  | 97.6  | 92.3  | 104.8 | 98.4  |
| 33859640  | Taldo1                      | 337  | 37.4  | Metabolic pathways; Biosynthesis of amino acids; Pentose phosphate pathway; Carbon metabolism                                                                                                                                                                   | 118.5 | 115   | 119.3 | 119.9 | 80    | 82.1  | 73.6  | 77.3  |
| 226958351 | Atp1a4                      | 1032 | 114.8 | Pancreatic secretion; Carbohydrate digestion and absorption; Mineral absorption; Protein digestion and absorption; Endocrine and other factor-regulated calcium reabsorption; Thyroid hormone synthesis; Thyroid hormone signaling pathway; Proximal tubule bic |       | 80.5  |       | 74.3  |       | 84.8  |       | 130.5 |
| 6679505   | Psmc4                       | 376  | 40.7  | Proteasome; Epstein-Barr virus infection                                                                                                                                                                                                                        | 94.4  | 91.5  | 89.8  | 89.4  | 103   | 107   | 101   | 109.3 |
| 214010153 | Apeh                        | 732  | 81.5  |                                                                                                                                                                                                                                                                 | 109.4 | 111   | 107.5 | 105.5 | 96.4  | 94    | 94.4  | 96.9  |
| 228480232 | Snrpa1                      | 255  | 28.3  | Spliceosome                                                                                                                                                                                                                                                     | 97.1  | 97.7  | 101.6 | 99.2  | 105.7 | 102.5 | 99.7  | 101.5 |
| 27370032  | Uba6                        | 1053 | 117.9 | Ubiquitin mediated proteolysis                                                                                                                                                                                                                                  | 99.3  | 104.5 | 103.1 | 104   | 108.4 | 111.6 | 103   | 100.1 |
| 13385872  | Ilf2                        | 390  | 43    |                                                                                                                                                                                                                                                                 | 98.8  | 98.4  | 93.7  | 93.9  | 99.9  | 102.6 | 95.9  | 94.4  |
| 309268181 | Gm12816                     | 403  | 45.8  |                                                                                                                                                                                                                                                                 | 88.2  | 90.3  | 98.8  | 104.6 | 99    | 96.1  | 110.6 | 107.1 |
| 117606385 | Tmx3                        | 456  | 51.8  |                                                                                                                                                                                                                                                                 | 109.4 | 106.8 | 102.1 | 102.1 | 92.7  | 92    | 88.4  | 90.6  |
| 45476573  | Eif3e                       | 445  | 52.2  | Hepatitis C; RNA transport                                                                                                                                                                                                                                      | 91.7  | 91.1  | 91.3  | 89.1  | 108.6 | 108.2 | 98.7  | 104   |
| 183980004 | Hnrnp1                      | 586  | 63.9  |                                                                                                                                                                                                                                                                 | 97    | 100.8 | 100.4 | 100.4 | 91.8  | 93    | 95.2  | 92.8  |
| 7305075   | G3bp1                       | 465  | 51.8  |                                                                                                                                                                                                                                                                 | 79.2  | 80.1  | 77.4  | 76.3  | 121.5 | 117.3 | 136.2 | 134.5 |
| 19526920  | 2610018G<br>03Rik;<br>Stk26 | 416  | 46.6  |                                                                                                                                                                                                                                                                 | 97.9  | 103.2 | 103.8 | 106.8 | 96.9  | 96.4  | 91.5  | 91.3  |
| 19526960  | Opa1                        | 960  | 111.3 |                                                                                                                                                                                                                                                                 | 108.1 | 108.9 | 101.8 | 102   | 98.7  | 97.9  | 94.7  | 89.7  |
| 30524920  | Gnl3                        | 538  | 60.7  | Ribosome biogenesis in eukaryotes                                                                                                                                                                                                                               | 85.2  | 85.8  | 87.9  | 86.7  | 118.8 | 118.9 | 121.2 | 121   |
| 160333605 | Xrcc5                       | 732  | 83    | Non-homologous end-joining                                                                                                                                                                                                                                      | 98.3  | 97.5  | 100.3 | 98.8  | 102.4 | 103.1 | 92.7  | 92.6  |
| 6679299   | Phb                         | 272  | 29.8  |                                                                                                                                                                                                                                                                 | 89.5  | 92    | 90    | 93.4  | 106.8 | 107.6 | 101.5 | 106.1 |

|           |                                                 |      |       |                                                                                        |       |       |       |       |       |       |       |       |
|-----------|-------------------------------------------------|------|-------|----------------------------------------------------------------------------------------|-------|-------|-------|-------|-------|-------|-------|-------|
| 6755100   | Pa2g4                                           | 394  | 43.7  |                                                                                        | 88.8  | 88.6  | 84.4  | 81.5  | 117   | 115.9 | 121.5 | 122.1 |
| 194353962 | Arf1                                            | 181  | 20.7  | Endocytosis; Phosphoinositide 3-kinase signaling pathway; Leishmaniasis                | 108.4 | 107.8 | 111.3 | 110.9 | 85.9  | 86.6  | 86.5  | 87.5  |
| 21450187  | Cecr5;<br>Hdhd5                                 | 419  | 46.3  |                                                                                        | 113.7 | 120.3 | 110   | 108   | 92.4  | 90.2  | 80.7  | 78.9  |
| 74229034  | Ipo7                                            | 1038 | 119.4 |                                                                                        | 80.1  | 87.4  | 79.7  | 84.2  | 118.9 | 117.2 | 128.1 | 114.9 |
| 119964716 | Fryl                                            | 3007 | 337.6 |                                                                                        | 100.4 | 103.3 | 97.3  | 99.3  | 97.3  | 94.3  | 96.6  | 96.7  |
| 269954677 | Qars                                            | 775  | 87.6  | Metabolic pathways; Aminoacyl-tRNA biosynthesis                                        | 94.2  | 92.3  | 89    | 90.2  | 112.1 | 107.7 | 105.8 | 109.8 |
| 10181122  | Wdr46                                           | 622  | 69    |                                                                                        | 96.5  | 97.3  | 96.4  | 96.7  | 108.4 | 108.2 | 105.8 | 104.3 |
| 29789080  | Copb2                                           | 905  | 102.4 |                                                                                        | 92.6  | 90.3  | 94.7  | 92.9  | 104.2 | 104.2 | 87.7  | 80.2  |
| 110665742 | Larp7                                           | 570  | 64.8  |                                                                                        | 94.7  | 93.8  | 93.1  | 96    | 104.3 | 103   | 106.3 | 106.5 |
| 20137004  | Psme2;<br>Psme2b;<br>Psme2b-ps                  | 239  | 27    | Proteasome; Antigen processing and presentation                                        | 111.1 | 116.4 | 115.2 | 112.6 | 88.6  | 93.4  | 84    | 83.8  |
| 13385312  | Plin3                                           | 437  | 47.2  |                                                                                        | 106.9 | 107   | 93.8  | 96.6  | 106.1 | 104.7 | 95.8  | 97.2  |
| 27229058  | Ddx47                                           | 455  | 50.6  |                                                                                        | 100.9 | 96    | 96.8  | 96.8  | 102.7 | 102.4 | 95.1  | 100.4 |
| 6755004   | Aifm1                                           | 612  | 66.7  | Apoptosis                                                                              | 106.7 | 103.2 | 102.8 | 102.1 | 105.7 | 104.1 | 89    | 93.5  |
| 255003709 | Ptbp3;<br>Rod1                                  | 551  | 59.4  |                                                                                        | 101.2 | 106.6 | 98.9  | 113.4 | 96    | 87.7  | 91.7  | 89.9  |
| 283806681 | Luc7l2                                          | 392  | 46.6  |                                                                                        | 102.3 | 101.7 | 100.5 | 100.5 | 103.8 | 107.4 | 78.9  | 82.7  |
| 365777424 | Oxsr1                                           | 527  | 58.2  |                                                                                        | 92.8  | 99    | 96.9  | 97.3  | 103.6 | 104.6 | 106.4 | 105.3 |
| 21311891  | Tmem43                                          | 400  | 44.8  |                                                                                        | 106.6 | 102.5 | 104.2 | 103.7 | 93.8  | 103.8 | 88.2  | 87.6  |
| 293597553 | Sept6                                           | 434  | 49.6  | Bacterial invasion of epithelial cells                                                 | 97.6  | 101   | 103.2 | 102   | 88.5  | 89.9  | 97.2  | 97.4  |
| 247300942 | Psmb10                                          | 273  | 29    | Proteasome                                                                             | 117.8 | 111.4 | 117.1 | 126.5 | 92.8  | 99.4  | 86    | 85.6  |
| 257196183 | Puf60                                           | 564  | 60.2  | Spliceosome                                                                            | 94.8  | 91.6  | 101.8 | 102.9 | 103   | 102.1 | 106   | 101.7 |
| 165932389 | Nup155                                          | 1391 | 155   | RNA transport                                                                          | 93.1  | 92.2  | 93.5  | 91    | 106.2 | 110.9 | 102.7 | 109   |
| 61098078  | Strn                                            | 780  | 85.9  |                                                                                        | 109.8 | 110.6 | 99.4  | 93.7  | 95.6  | 95.6  | 95.3  | 89.2  |
| 31981106  | Mogs                                            | 834  | 91.8  | Metabolic pathways; N-Glycan biosynthesis; Protein processing in endoplasmic reticulum | 97.2  | 92.3  | 92.5  | 92.9  | 116.5 | 116.9 | 104.4 | 105.8 |
| 228480236 | Prpf31                                          | 499  | 55.4  | Spliceosome                                                                            | 89.5  | 91.4  | 94.9  | 89.7  | 101.3 | 95.2  | 107.5 | 110.9 |
| 23956096  | Uso1                                            | 959  | 106.9 |                                                                                        | 105.7 | 108.4 | 99    | 102.6 | 96    | 92.6  | 91.8  | 87.4  |
| 133778915 | Hmgn5                                           | 406  | 45.3  |                                                                                        | 119.8 | 120.6 | 110.6 | 110.8 | 78.1  | 79.8  | 93.1  | 92.8  |
| 357527458 | Sec23b                                          | 767  | 86.4  | Protein processing in endoplasmic reticulum                                            | 102.2 | 97.7  | 96.3  | 96.5  | 103.5 | 105.8 | 98.2  | 99.9  |
| 226246667 | Dhx16                                           | 1044 | 119   | Spliceosome                                                                            | 99.6  | 103.9 | 96.3  | 101.6 | 105.7 | 105.1 | 103.6 | 94.1  |
| 40789092  | Rrp12                                           | 1295 | 143   |                                                                                        | 90.5  | 89.3  | 91.3  | 89.4  | 113.3 | 118   | 111.7 | 109   |
| 47059484  | Rbbp4                                           | 425  | 47.6  |                                                                                        | 89.8  | 86.5  | 92.1  | 93.4  | 107.4 | 107.4 | 109.4 | 106.6 |
| 158635992 | Pdlim1                                          | 327  | 35.8  |                                                                                        | 123.1 | 124.5 | 106.4 | 109.2 | 74.8  | 77.6  | 89.1  | 87.3  |
| 30061345  | Hist1h3i;<br>Hist1h3a;<br>Hist1h3g;<br>Hist1h3h | 136  | 15.4  | Transcriptional misregulation in cancer; Alcoholism; Systemic lupus erythematosus      | 97.2  | 103.9 | 99.9  | 107.4 | 95.9  | 90.7  | 97.6  | 92.7  |

|           |                 |      |       |                                                                                                                                                  |       |       |       |       |       |       |       |       |
|-----------|-----------------|------|-------|--------------------------------------------------------------------------------------------------------------------------------------------------|-------|-------|-------|-------|-------|-------|-------|-------|
| 223555992 | Tgtp2;<br>Tgtp1 | 415  | 47.1  |                                                                                                                                                  | 104.5 | 104.3 | 90.6  | 94.4  | 105.9 | 105.7 | 101.4 | 101.9 |
| 295054230 | Ubqln1          | 582  | 61.9  | Protein processing in endoplasmic reticulum                                                                                                      | 108.7 | 108.2 | 99.5  | 98.9  | 88.6  | 101.3 | 102   | 98.1  |
| 255982530 | Rpa1            | 644  | 71.4  |                                                                                                                                                  | 94.9  | 88.3  | 89.8  | 91.2  | 100.3 | 109.1 | 108.5 | 111.2 |
| 213417812 | Raly            | 312  | 33.2  |                                                                                                                                                  | 92.4  | 92.9  | 92    | 94    | 105   | 105.4 | 107.5 | 103.9 |
| 161016795 | Ddx6            | 483  | 54.2  | RNA degradation                                                                                                                                  | 92.1  | 93.2  | 97.7  | 94.3  | 105.9 | 109.1 | 88.9  | 85.6  |
| 171906578 | Rad23b          | 416  | 43.5  | Nucleotide excision repair; Protein processing in endoplasmic reticulum                                                                          | 99.3  | 101   | 103.4 | 100.8 | 95.4  | 93.9  | 110.1 | 112.1 |
| 6680924   | Cfl1            | 166  | 18.5  | Regulation of actin cytoskeleton; Axon guidance; Pertussis; Fc gamma R-mediated phagocytosis                                                     | 114.5 | 113.9 | 133.7 | 132.8 | 72.7  | 71.7  | 81.9  | 82    |
| 256818806 | Wars            | 475  | 53.6  |                                                                                                                                                  | 88.4  |       | 84.1  |       | 110.8 |       | 125.7 |       |
| 16716381  | Kars            | 595  | 67.8  | Aminoacyl-tRNA biosynthesis                                                                                                                      | 85.9  | 84.6  | 83.3  | 84.3  | 115.2 | 114.6 | 123.1 | 120.6 |
| 34536815  | Ppp6r1          | 856  | 94.5  |                                                                                                                                                  | 113.1 | 114.6 | 105   | 103   | 91.8  | 93.1  | 84.4  | 81.8  |
| 68533246  | Thrap3          | 951  | 108.1 |                                                                                                                                                  | 94.7  | 97    | 112.4 | 101   | 97.7  | 99.1  | 102.4 | 105.1 |
| 209862973 | Ssrp1           | 708  | 80.8  |                                                                                                                                                  | 91.9  | 94.7  | 101.8 | 99.9  | 108.7 | 109.6 | 87.2  | 79.4  |
| 227116320 | Fkbp15          | 1216 | 132.9 |                                                                                                                                                  | 110   | 107   | 106.1 | 103.5 | 97.3  | 98.6  | 91.4  | 96.5  |
| 491222947 | Farsb           | 589  | 65.7  | Aminoacyl-tRNA biosynthesis                                                                                                                      | 91.7  | 90.8  | 97.7  | 98.7  | 106.9 | 105.7 | 107.7 | 104.4 |
| 112734861 | Ipo9            | 1040 | 115.9 |                                                                                                                                                  | 98.6  | 100.3 | 92.3  | 88.5  | 105.5 | 106.1 | 106.8 | 107.8 |
| 34328209  | Impdh1          | 514  | 55.2  | Metabolic pathways; Purine metabolism; Drug metabolism - other enzymes                                                                           | 92.6  | 96.3  | 91.8  | 92.9  | 114.9 | 106.3 | 104.7 | 104.7 |
| 227908779 | Rrs1            | 365  | 41.5  |                                                                                                                                                  | 86.5  | 85.7  | 86.9  | 84.9  | 119.8 | 123.1 | 131.3 | 128.9 |
| 244791455 | Lck             | 520  | 59    |                                                                                                                                                  | 89.7  | 92.1  | 104.2 | 102.5 | 94    | 104   | 101   | 85.5  |
| 157909799 | Rbbp7           | 425  | 47.8  |                                                                                                                                                  | 79.8  | 84.6  | 84.1  | 80.8  | 120.1 | 112.4 | 120   | 121.3 |
| 118026904 | Nol6            | 1152 | 129.1 | Ribosome biogenesis in eukaryotes                                                                                                                | 100.5 | 93.5  | 87.7  | 89.2  | 112.4 | 114.5 | 114.8 | 113.9 |
| 148747526 | Rab7            | 207  | 23.5  | Endocytosis; Tuberculosis; Phagosome; Salmonella infection; Amoebiasis                                                                           | 98.4  | 99.4  | 96    | 97.6  | 101.3 | 102.4 | 101.9 | 99    |
| 255308871 | Def6            | 630  | 73.4  |                                                                                                                                                  | 108   | 105.3 | 102.9 | 100   | 90.1  | 93.4  | 90.9  | 93.7  |
| 163965357 | Naca            | 2187 | 220.4 |                                                                                                                                                  | 99.3  | 97    | 86.9  | 87.5  | 110.2 | 111.7 | 108.9 | 108.9 |
| 6755372   | Rps3            | 243  | 26.7  | Ribosome                                                                                                                                         | 80.8  | 78.6  | 90    | 90.5  | 114   | 115   | 116.1 | 115.6 |
| 254826718 | Atl3            | 541  | 60.5  |                                                                                                                                                  | 84.4  | 81.3  | 77.8  | 80.6  | 124.5 | 124.6 | 121.9 | 119.1 |
| 6680598   | Kpna4           | 521  | 57.9  |                                                                                                                                                  | 95.2  | 102.9 | 94.9  | 109.5 | 105.2 | 98.3  | 114.8 | 110   |
| 225543409 | Pspc1           | 523  | 58.7  |                                                                                                                                                  | 104.7 | 102.2 | 97.2  | 96.4  | 98.9  | 97.6  | 104.3 | 110   |
| 6671672   | Capza2          | 286  | 32.9  | Endocytosis                                                                                                                                      | 107.4 | 110   | 105.8 | 106   | 90.7  | 90.3  | 94.6  | 93.8  |
| 28077049  | Chmp4b          | 224  | 24.9  | Endocytosis                                                                                                                                      | 101.7 | 103.4 | 96.8  | 98.8  | 103.2 | 98.9  | 105   | 100.5 |
| 329664973 | Actr3           | 418  | 47.3  |                                                                                                                                                  | 105.7 | 104.6 | 105.6 | 107.6 | 94.1  | 91.7  | 87.1  | 86.2  |
| 21313536  | Dlst            | 454  | 49    | Citrate cycle (TCA cycle); Metabolic pathways; Lysine degradation; Carbon metabolism                                                             | 104.1 | 106   | 101.9 | 103.6 | 105.5 | 101.9 | 96.3  | 97.7  |
| 459352741 | Ide             | 1019 | 117.6 | Alzheimer's disease                                                                                                                              | 82.7  | 84.4  | 80.2  | 78.8  | 118.4 | 116   | 122.9 | 124.2 |
| 359385698 | Ywhaz           | 245  | 27.8  | Epstein-Barr virus infection; Hippo signaling pathway; Hepatitis B; Oocyte meiosis; Cell cycle; PI3K-Akt signaling pathway; Viral carcinogenesis | 115.2 | 110.7 | 105.2 | 109.3 | 90    | 89.2  | 93.4  | 90.8  |

|           |                  |      |       |                                                                                                                                                                                                                                                                   |       |       |       |       |       |       |       |       |
|-----------|------------------|------|-------|-------------------------------------------------------------------------------------------------------------------------------------------------------------------------------------------------------------------------------------------------------------------|-------|-------|-------|-------|-------|-------|-------|-------|
| 226443026 | Nap1l1           | 418  | 48.5  |                                                                                                                                                                                                                                                                   | 75.9  | 68.5  | 73.6  | 69.8  | 130.1 | 137.1 | 122.7 | 130.9 |
| 166091434 | Supt6;<br>Supt6h | 1726 | 199   |                                                                                                                                                                                                                                                                   | 99.8  | 99.9  | 102.8 | 101.3 | 99.7  | 100.4 | 94.6  | 100.1 |
| 33859769  | Adrbk1;<br>Grk2  | 647  | 75.1  |                                                                                                                                                                                                                                                                   | 102.4 | 96.9  | 108   | 105.3 | 94.9  | 101.1 | 93.4  | 104   |
| 160333077 | Trp53bp1         | 1969 | 212.6 | NOD-like receptor signaling pathway                                                                                                                                                                                                                               | 103.6 | 111.5 | 99.1  | 106.5 | 97.9  | 101.4 | 100.8 | 103.2 |
| 18700004  | Acaa1a           | 424  | 43.9  | PPAR signaling pathway; Fatty acid metabolism; Valine, leucine and isoleucine degradation; Metabolic pathways; Fatty acid degradation; alpha-Linolenic acid metabolism; Biosynthesis of unsaturated fatty acids; Peroxisome                                       | 104.5 | 106.2 | 94.7  | 97.5  | 100.3 | 99.3  | 102.5 | 98.7  |
| 30519969  | Poldip3          | 420  | 46.1  |                                                                                                                                                                                                                                                                   | 107.1 | 110   | 101   | 109.3 | 94.4  | 93.6  | 92.8  | 89.8  |
| 170932536 | Ddx19a           | 478  | 53.9  |                                                                                                                                                                                                                                                                   | 87    | 86    | 81.4  | 79.6  | 115.2 | 114.7 | 119.6 | 116.9 |
| 6754474   | Kpna2            | 529  | 57.9  | Influenza A                                                                                                                                                                                                                                                       | 55.3  | 58.3  | 57.9  | 64.2  | 158.9 | 155.6 | 159.6 | 156.8 |
| 188497724 | Hdgf             | 237  | 26.3  |                                                                                                                                                                                                                                                                   | 119.7 | 120   | 113.8 | 118.9 | 77    | 72.5  | 103.5 | 94.8  |
| 85060507  | Hnrpa1           | 373  | 38.8  |                                                                                                                                                                                                                                                                   | 85.6  | 84.7  | 93.7  | 92.5  | 112.6 | 114.7 | 110.4 | 108.2 |
| 166235127 | Rbm28            | 750  | 84.2  | Ribosome biogenesis in eukaryotes                                                                                                                                                                                                                                 | 92.8  | 92.9  | 92.1  | 90.7  | 105.7 | 108.6 | 108.5 | 110.1 |
| 253795498 | Dek              | 380  | 43.1  |                                                                                                                                                                                                                                                                   | 116.7 | 115.3 | 98.1  | 100.4 | 96.8  | 96.9  | 97.9  | 97    |
| 254750698 | Nucb1            | 459  | 53.4  |                                                                                                                                                                                                                                                                   | 93.8  | 93.6  | 83.8  | 86.1  | 105.7 | 106.8 | 117.9 | 115.6 |
| 257153454 | Nampt            | 491  | 55.4  | NOD-like receptor signaling pathway; Metabolic pathways; Nicotinate and nicotinamide metabolism                                                                                                                                                                   | 89.6  | 96.1  | 88.3  | 85.2  | 107.5 | 103.3 | 105.1 | 105.8 |
| 162951837 | Cyth1            | 400  | 46.4  |                                                                                                                                                                                                                                                                   | 109.8 | 108.9 | 110.1 | 100.6 | 90    | 91.6  | 91.9  | 97.4  |
| 6680027   | Glud1            | 558  | 61.3  | Metabolic pathways; Nitrogen metabolism; Proximal tubule bicarbonate reclamation; Carbon metabolism; D-Glutamine and D-glutamate metabolism; Alanine, aspartate and glutamate metabolism; Arginine biosynthesis                                                   | 111.6 | 113.7 | 105.6 | 104.9 | 91.5  | 91.5  | 97.8  | 96.4  |
| 13385500  | Tomm34           | 309  | 34.3  |                                                                                                                                                                                                                                                                   | 100   | 99.9  | 94.1  | 96    | 101.2 | 101.4 | 109.6 | 106.2 |
| 229577281 | Uchl5            | 329  | 37.6  |                                                                                                                                                                                                                                                                   | 105   | 109   | 101.2 | 99.5  | 94.8  | 100.6 | 102.2 | 105.9 |
| 28077029  | Pck2             | 667  | 73.4  | FoxO signaling pathway; PPAR signaling pathway; Pyruvate metabolism; Citrate cycle (TCA cycle); Insulin signaling pathway; Metabolic pathways; Insulin resistance; Glycolysis / Gluconeogenesis; Proximal tubule bicarbonate reclamation; Adipocytokine signaling | 83.7  | 81.7  | 73.4  | 75.6  | 139.3 | 137.8 | 129.5 | 130.5 |
| 260166706 | Ubp2l            | 1107 | 116.7 |                                                                                                                                                                                                                                                                   | 82.2  | 85.2  | 87.8  | 92.5  | 113   | 115.7 | 127.6 | 121.7 |
| 239985513 | Atad3a           | 591  | 66.7  |                                                                                                                                                                                                                                                                   | 97.5  | 95.4  | 91.2  | 88.3  | 117.6 | 118.9 | 103   | 109.6 |
| 30102935  | Tbl3             | 801  | 88.2  | Ribosome biogenesis in eukaryotes                                                                                                                                                                                                                                 | 87.3  | 86.6  | 82.5  | 86.6  | 121.4 | 123.9 | 120.4 | 114.2 |
| 46849708  | Sucla2           | 463  | 50.1  | Citrate cycle (TCA cycle); Metabolic pathways; Propanoate metabolism; Carbon metabolism                                                                                                                                                                           | 107.5 | 107.1 | 112.1 | 111.7 | 92    | 91.3  | 95.6  | 94.5  |
| 160837788 | Arpc1b           | 372  | 41    | Endocytosis; Regulation of actin cytoskeleton; Salmonella infection; Fc gamma R-mediated phagocytosis; Bacterial invasion of epithelial cells                                                                                                                     | 106.1 | 104.3 | 105.5 | 104   | 87.7  | 85.2  | 91.8  | 97    |
| 47271535  | Srp68            | 625  | 70.5  | Protein export                                                                                                                                                                                                                                                    | 90.3  | 91.8  | 93.5  | 94.1  | 108.6 | 109   | 109.5 | 107.8 |

|           |           |      |       |                                                                                                                                                                                                                                                                 |       |       |       |       |       |       |       |       |
|-----------|-----------|------|-------|-----------------------------------------------------------------------------------------------------------------------------------------------------------------------------------------------------------------------------------------------------------------|-------|-------|-------|-------|-------|-------|-------|-------|
| 7242171   | Pcna      | 261  | 28.8  | DNA replication; Hepatitis B; HTLV-I infection; Nucleotide excision repair; Cell cycle; Base excision repair; Mismatch repair                                                                                                                                   | 56.6  | 54.8  | 57.2  | 54.9  | 149.9 | 151.6 | 151.7 | 154.6 |
| 114052541 | Snrpa     | 287  | 31.8  | Spliceosome                                                                                                                                                                                                                                                     | 104.3 | 107.7 | 100.6 | 102.3 | 92.5  | 95.1  | 89.5  | 92.2  |
| 116089322 | Lonp1     | 949  | 105.8 |                                                                                                                                                                                                                                                                 | 95.1  | 101.5 | 96.3  | 94.4  | 115   | 114.2 | 108.7 | 105.9 |
| 13386146  | Prps2     | 318  | 34.8  | Metabolic pathways; Biosynthesis of amino acids; Purine metabolism; Pentose phosphate pathway; Carbon                                                                                                                                                           | 87.8  | 87    | 112.8 | 113   | 106   | 105.1 | 99    | 94.2  |
| 15805016  | Ubqln4    | 596  | 63.5  | Protein processing in endoplasmic reticulum                                                                                                                                                                                                                     | 106.8 | 103.4 | 98.1  | 89.7  | 96    | 106.9 | 106.1 | 103.7 |
| 157909801 | Tomm40    | 361  | 37.9  | Amyotrophic lateral sclerosis (ALS)                                                                                                                                                                                                                             | 88.9  | 86.5  | 92.5  | 92.3  | 115.1 | 115.7 | 111.8 | 109.5 |
| 260064007 | Usp24     | 2617 | 293.8 |                                                                                                                                                                                                                                                                 | 111.3 | 102   | 106.8 | 107.4 | 100.1 | 96.9  | 94.2  | 96.3  |
| 115385968 | Tnpo1     | 898  | 102.3 |                                                                                                                                                                                                                                                                 | 94.3  | 98.9  | 98.1  | 97    | 104.8 | 102.3 | 91.1  | 95.3  |
| 21450129  | Acat1     | 424  | 44.8  | Fatty acid metabolism; Pyruvate metabolism; Tryptophan metabolism; Valine, leucine and isoleucine degradation; Metabolic pathways; Terpenoid backbone biosynthesis; Lysine degradation; Fatty acid degradation; Butanoate metabolism; Propanoate metabolism; Sv | 107.5 | 105.6 | 108.3 | 111.2 | 91.7  | 98    | 91.7  | 87.8  |
| 39930543  | Nup54     | 510  | 55.7  | RNA transport                                                                                                                                                                                                                                                   | 95.4  | 94.5  | 93.6  | 92.6  | 102.8 | 106.8 | 100.2 | 98.5  |
| 120537241 | Lars      | 1178 | 134.1 | Aminoacyl-tRNA biosynthesis                                                                                                                                                                                                                                     | 78.4  | 75.4  | 78    | 75.7  | 127   | 130.6 | 124.1 | 127.7 |
| 28316750  | Hist1h2ba | 127  | 14.2  | Alcoholism; Systemic lupus erythematosus; Viral carcinogenesis                                                                                                                                                                                                  | 113.4 | 105.6 | 109.4 | 116.6 | 93.6  | 85.2  | 85.8  | 74.9  |
| 226443091 | Hnrmpa0   | 305  | 30.5  |                                                                                                                                                                                                                                                                 | 91.9  | 95.1  | 108.7 | 105.1 | 97.4  | 96.1  | 102.5 | 102.1 |
| 18079341  | Eif3h     | 352  | 39.8  | RNA transport; Measles                                                                                                                                                                                                                                          | 87.5  | 82.9  | 93.1  | 94.2  | 117.4 | 122.3 | 104.2 | 106.3 |
| 26986593  | Ddx19b    | 479  | 53.9  |                                                                                                                                                                                                                                                                 | 97.4  | 101.5 | 85.9  | 91.6  | 101.9 | 113.6 | 128.7 | 113.6 |
| 31560737  | Adss      | 456  | 50    | Metabolic pathways; Purine metabolism; Alanine, aspartate and glutamate metabolism                                                                                                                                                                              | 81.3  | 78.8  | 79.1  | 77.9  | 131   | 125.9 | 108.6 | 126.8 |
| 18700024  | Idh3b     | 384  | 42.2  | Citrate cycle (TCA cycle); Metabolic pathways; Biosynthesis of amino acids; 2-Oxocarboxylic acid metabolism; Carbon metabolism                                                                                                                                  | 108.9 | 107.4 | 104.3 | 104.3 | 97.7  | 98.2  | 86.9  | 84.3  |
| 10946574  | Ckb       | 381  | 42.7  | Arginine and proline metabolism; Metabolic pathways                                                                                                                                                                                                             | 118.1 | 115.1 | 88.1  | 85    | 104.5 | 108   | 93.6  | 95.9  |
| 160298209 | Got1      | 413  | 46.2  | Arginine and proline metabolism; Metabolic pathways; Phenylalanine, tyrosine and tryptophan biosynthesis; Biosynthesis of amino acids; 2-Oxocarboxylic acid metabolism; Cysteine and methionine metabolism; Carbon metabolism; Alanine, aspartate and glutamate | 86.6  | 93.3  | 106.1 | 103.7 | 112.8 | 106.2 | 100   | 100.2 |
| 83649709  | Atxn10    | 475  | 53.7  |                                                                                                                                                                                                                                                                 | 77.8  | 74.7  | 72.9  | 74.1  | 126   | 128.8 | 126.7 | 121.6 |
| 239835765 | Tap1      | 724  | 78.8  | Herpes simplex infection; Primary immunodeficiency; ABC transporters; Phagosome; Antigen processing and                                                                                                                                                         | 102.4 | 103.6 | 104.3 | 103   | 103.7 | 102.7 | 88.1  | 88.1  |
| 238624114 | Acot2     | 453  | 49.6  | Ovarian steroidogenesis; Metabolic pathways; Fatty acid elongation; Biosynthesis of unsaturated fatty acids                                                                                                                                                     | 113.3 | 110.6 | 120.6 | 128.5 | 93.1  | 92.1  | 87.4  | 84.1  |
| 6755963   | Vdac1     | 283  | 30.7  | NOD-like receptor signaling pathway; HTLV-I infection; Huntington's disease; Parkinson's disease; cGMP-PKG signaling pathway; Calcium signaling pathway; Influenza A                                                                                            | 91.2  | 102.4 | 88    | 89.6  | 105.7 | 108   | 109.1 | 106.5 |
| 161016822 | Dnpep     | 475  | 52.4  |                                                                                                                                                                                                                                                                 | 107.9 | 106.5 | 98.8  | 100.9 | 108.9 | 110.9 | 90.9  | 92.6  |
| 256818750 | Urb1      | 2277 | 254.7 |                                                                                                                                                                                                                                                                 | 97.3  | 101   | 93.8  | 89.3  | 113.9 | 115.6 | 105.8 | 107.6 |

|           |                             |      |       |                                                                                                                                                                                                        |       |       |       |       |       |       |       |       |
|-----------|-----------------------------|------|-------|--------------------------------------------------------------------------------------------------------------------------------------------------------------------------------------------------------|-------|-------|-------|-------|-------|-------|-------|-------|
| 15147224  | Sfxn1                       | 322  | 35.6  |                                                                                                                                                                                                        | 98.9  | 96.8  | 97.9  | 97.4  | 112.4 | 106.7 | 94.4  | 93.2  |
| 91992157  | Aak1                        | 959  | 103.3 |                                                                                                                                                                                                        | 107.8 | 110.4 | 109.4 | 111   | 93    | 91    | 86.7  | 89.1  |
| 6754910   | Nudc                        | 332  | 38.3  |                                                                                                                                                                                                        | 102.2 | 92.1  | 88.7  | 89.6  | 111.4 | 115.8 | 112.3 | 115.4 |
| 255760028 | Hels1                       | 486  | 54.2  | Proteoglycans in cancer; Tight junction; Bacterial invasion of epithelial cells                                                                                                                        | 104.5 | 108.6 | 106.4 | 107.1 | 88.6  | 84.6  | 100.9 | 97.6  |
| 31981160  | Bzw2                        | 419  | 48    |                                                                                                                                                                                                        | 91.2  | 95.9  | 94.6  | 98.7  | 105.4 | 101.2 | 104.2 | 99.3  |
| 6753738   | Eif2s3x                     | 472  | 51    | RNA transport                                                                                                                                                                                          | 90.2  | 84.4  | 92.5  | 95    | 119   | 121.8 | 105   | 107.3 |
| 124486835 | Prrc2c                      | 2846 | 310.7 |                                                                                                                                                                                                        | 96.4  | 101.3 | 95.7  | 91.2  | 101.9 | 100.7 | 115.1 | 113.1 |
| 313760674 | Pkn1                        | 951  | 104.9 |                                                                                                                                                                                                        | 110.2 | 108.8 | 106   | 108.7 | 95.5  | 94.7  | 93.2  | 95.4  |
| 16751835  | Cpsf1                       | 1441 | 160.7 | mRNA surveillance pathway                                                                                                                                                                              | 103.3 | 107.6 | 98.3  | 99.8  | 104.8 | 103.5 | 102.6 | 100   |
| 6677659   | Dnajc2                      | 621  | 71.7  |                                                                                                                                                                                                        | 92.3  | 87.7  | 84.3  | 87.9  | 111.8 | 107.9 | 120.8 | 126.4 |
| 165972315 | Rras2                       | 204  | 23.4  | Phospholipase D signaling pathway; Regulation of actin cytoskeleton; MAPK signaling pathway; Ras signaling pathway; HTLV-I infection; Proteoglycans in cancer; cAMP signaling pathway; Tight junction  | 102.7 | 100.6 | 104.1 | 105.3 | 101.4 | 101.9 | 90.5  | 84.8  |
| 158854016 | Skp1a                       | 163  | 18.7  | Herpes simplex infection; Wnt signaling pathway; Ubiquitin mediated proteolysis; Circadian rhythm; Oocyte meiosis; Cell cycle; TGF-beta signaling pathway; Protein processing in endoplasmic reticulum | 114.1 | 113.8 | 99.8  | 100.5 | 99.6  | 109.7 | 101   | 96.7  |
| 23956176  | Sugt1                       | 336  | 38.1  | NOD-like receptor signaling pathway                                                                                                                                                                    | 106.9 | 103.7 | 100.8 | 99.5  | 94.1  | 92.3  | 91.7  | 97.8  |
| 52138536  | Gbf1                        | 1861 | 206.7 | Endocytosis                                                                                                                                                                                            | 100.9 | 104.2 | 99.5  | 99.1  | 101.7 | 104.1 | 107.7 | 98.8  |
| 124487145 | 1110037F<br>02Rik;<br>Virma | 1861 | 207   |                                                                                                                                                                                                        | 102.9 | 98.5  | 95.7  | 95.7  | 95.6  | 102.1 | 101.9 | 101.5 |
| 126517469 | Mecp2                       | 501  | 53.5  |                                                                                                                                                                                                        | 118.7 | 125.3 | 133.6 | 137   | 86.3  | 85.7  | 82.1  | 77.5  |
| 6671696   | Cbx1                        | 185  | 21.4  |                                                                                                                                                                                                        | 124.5 | 118.6 | 122.5 | 122.6 | 81.5  | 80.7  | 49.9  | 62.9  |
| 254692859 | Ndufa9                      | 377  | 42.5  | Metabolic pathways; Huntington's disease; Non-alcoholic fatty liver disease (NAFLD); Oxidative phosphorylation; Parkinson's disease; Alzheimer's disease                                               | 106.8 | 107.3 | 112.5 | 113.1 | 97.2  | 102.6 | 80.9  | 87.8  |
| 115511018 | Usp9x                       | 2554 | 290   |                                                                                                                                                                                                        | 100.8 | 97    | 100.8 | 96.7  | 97.2  | 103.2 | 100.6 | 104.4 |
| 6671565   | Ap3d1                       | 1199 | 135   | Lysosome                                                                                                                                                                                               | 105.7 | 103.4 | 102.1 | 106.2 | 107   | 97.3  | 95.6  | 99.7  |
| 160707909 | Vasp                        | 375  | 39.6  | Leukocyte transendothelial migration; Focal adhesion; Platelet activation; Fc gamma R-mediated phagocytosis; cGMP-PKG signaling pathway; Rap1 signaling pathway                                        | 109.3 | 106.4 | 111.5 | 109.4 | 85.4  | 87.2  | 96.5  | 94.7  |
| 6755114   | Prdx5                       | 210  | 21.9  | Peroxisome                                                                                                                                                                                             | 120.6 | 116.2 | 129.4 | 129   | 73.5  | 77.5  | 73.5  | 76.3  |
| 229577283 | Uchl5                       | 328  | 37.5  |                                                                                                                                                                                                        | 89.9  | 88.1  | 86.4  | 89.7  | 110.7 | 108.2 | 114.2 | 112.5 |
| 215272382 | Myo9b                       | 2128 | 240.2 |                                                                                                                                                                                                        | 111.7 | 96.8  | 85.6  | 97.2  | 88    | 98.5  | 105.8 | 96.9  |
| 124249058 | Tecpr1                      | 1166 | 130.2 |                                                                                                                                                                                                        | 108.6 | 129.5 | 105.5 | 103.8 | 89.6  | 104   | 90.7  | 81.4  |
| 239915963 | Tap2                        | 702  | 77.4  | Herpes simplex infection; Primary immunodeficiency; ABC transporters; Phagosome; Antigen processing and                                                                                                | 105.6 | 107.8 | 104.3 | 103.1 | 98.6  | 102.7 | 90.3  | 89.7  |
| 112181167 | Clqbp                       | 279  | 31    | Herpes simplex infection                                                                                                                                                                               | 95.4  | 94.4  | 91.9  | 91    | 110.8 | 112.8 | 126.5 | 123.1 |
| 118344452 | Srp72                       | 671  | 74.6  | Protein export                                                                                                                                                                                         | 92.7  | 94.8  | 94.5  | 93    | 101.4 | 101.1 | 109.1 | 111.9 |

|           |                                                         |      |       |                                                                                                                                                                                                                                                                   |       |       |       |       |       |       |       |       |
|-----------|---------------------------------------------------------|------|-------|-------------------------------------------------------------------------------------------------------------------------------------------------------------------------------------------------------------------------------------------------------------------|-------|-------|-------|-------|-------|-------|-------|-------|
| 225543482 | Naa15                                                   | 865  | 101   |                                                                                                                                                                                                                                                                   | 86.3  | 86.9  | 90.6  | 88.8  | 113.4 | 112.7 | 102.5 | 108.9 |
| 158636007 | Rps6ka1                                                 | 735  | 82.8  |                                                                                                                                                                                                                                                                   | 108.6 | 111.4 | 101.2 | 102.4 | 95.6  | 96.5  | 96.2  | 97.5  |
| 113680352 | Cbr1                                                    | 277  | 30.6  | Metabolic pathways; Arachidonic acid metabolism; Chemical carcinogenesis; Metabolism of xenobiotics by cytochrome P450                                                                                                                                            | 130.8 | 128.9 | 105.1 | 105.5 | 76.9  | 74.7  | 75.9  | 74.9  |
| 256773292 | Prpsap2                                                 | 369  | 40.9  |                                                                                                                                                                                                                                                                   | 99.1  | 101.5 | 103.4 | 105.9 | 96.7  | 91.4  | 99    | 97.3  |
| 407263860 | Hist1h2al                                               | 145  | 15.9  |                                                                                                                                                                                                                                                                   | 86.9  |       | 129.1 |       | 80.2  |       | 96.3  |       |
| 100818161 | Rap1gds1                                                | 607  | 66    |                                                                                                                                                                                                                                                                   | 95.1  | 102.3 | 96.9  | 97.2  | 100.4 | 96.7  | 94.7  | 88.4  |
| 31980998  | Acot9                                                   | 439  | 50.5  |                                                                                                                                                                                                                                                                   | 99.7  | 100.8 | 94.9  | 95.8  | 100.1 | 102.4 | 105.9 | 108   |
| 31560313  | Usp14                                                   | 493  | 56    |                                                                                                                                                                                                                                                                   | 95.2  | 92.9  | 94.7  | 92.2  | 105   | 102   | 106   | 108.4 |
| 411147387 | Yars                                                    | 564  | 63    | Aminoacyl-tRNA biosynthesis                                                                                                                                                                                                                                       | 80.1  | 81.4  | 84.4  | 84.3  | 116.5 | 117.2 | 121.8 | 119.6 |
| 13385296  | Bzw1                                                    | 419  | 48    |                                                                                                                                                                                                                                                                   | 85.9  | 88.1  | 88.4  | 85.3  | 106.8 | 103.2 | 109.3 | 117.9 |
| 309264022 | Rpsa;<br>LOC100045332;<br>LOC100505031;<br>LOC102642680 | 295  | 32.8  | Ribosome                                                                                                                                                                                                                                                          | 89.9  | 90.7  | 92.9  | 91.9  | 110.2 | 108.4 | 112.5 | 112.9 |
| 31982520  | Acadl                                                   | 430  | 47.9  | PPAR signaling pathway; Fatty acid metabolism; Metabolic pathways; Fatty acid degradation                                                                                                                                                                         | 109.2 | 113.3 | 111.6 | 108   | 99.4  | 96.2  | 89.8  | 89.1  |
| 22094075  | Slc25a5                                                 | 298  | 32.9  | HTLV-I infection; Huntington's disease; Parkinson's disease; cGMP-PKG signaling pathway; Calcium signaling                                                                                                                                                        | 87.4  | 88    | 95    | 94.4  | 107.6 | 109   | 105.2 | 104.9 |
| 6677759   | Rock1                                                   | 1354 | 158.1 | Oxytocin signaling pathway; Leukocyte transendothelial migration; Regulation of actin cytoskeleton; MicroRNAs in cancer; Focal adhesion; Chemokine signaling pathway; Platelet activation; Axon guidance; Sphingolipid signaling pathway; Proteoglycans in cancer | 105.1 | 106.2 | 101.2 | 99.5  | 94.6  | 95.2  | 97.3  | 96.6  |
| 115334671 | Aldh9a1                                                 | 518  | 55.9  | Histidine metabolism; Pyruvate metabolism; Arginine and proline metabolism; Tryptophan metabolism; Valine, leucine and isoleucine degradation; Metabolic pathways; Lysine degradation; Fatty acid degradation; Glycolysis / Gluconeogenesis; beta-Alanine metab   | 102.4 | 108   | 106.3 | 103.4 | 92.9  | 91.3  | 94.8  | 93.2  |
| 163644327 | Aqr                                                     | 1481 | 170.2 | Spliceosome                                                                                                                                                                                                                                                       | 92.7  | 93.6  | 97.2  | 93    | 113.2 | 119.7 | 99.8  | 103.3 |
| 33563256  | Gnai3                                                   | 354  | 40.5  | Oxytocin signaling pathway; Leukocyte transendothelial migration; Morphine addiction; Cholinergic synapse; Chagas disease (American trypanosomiasis); Retrograde endocannabinoid signaling; Dopaminergic synapse; Progesterone-mediated oocyte maturation; GABA   | 97.3  | 83.1  | 95.8  | 77.9  | 99.9  | 106.4 | 84    | 118.1 |
| 253795509 | Rnf20                                                   | 973  | 113.5 |                                                                                                                                                                                                                                                                   | 99.7  | 98.4  | 95.5  | 99.9  | 104.2 | 106.1 | 108.6 | 105.5 |
| 148747424 | Slc25a4                                                 | 298  | 32.9  | HTLV-I infection; Huntington's disease; Parkinson's disease; cGMP-PKG signaling pathway; Calcium signaling                                                                                                                                                        | 101   | 100.3 | 104.6 | 105.1 | 103   | 103.1 | 103   | 103.6 |
| 225579033 | Idh2                                                    | 452  | 50.9  | Glutathione metabolism; Citrate cycle (TCA cycle); Metabolic pathways; Biosynthesis of amino acids; 2-Oxocarboxylic acid metabolism; Carbon metabolism;                                                                                                           | 115.2 | 114.3 | 107.1 | 105.8 | 91.5  | 92.4  | 78.8  | 80.3  |



|           |                                                |      |       |                                                                                                                                                                                                                                                                 |       |       |       |       |       |       |       |       |
|-----------|------------------------------------------------|------|-------|-----------------------------------------------------------------------------------------------------------------------------------------------------------------------------------------------------------------------------------------------------------------|-------|-------|-------|-------|-------|-------|-------|-------|
| 33859753  | Rap1b                                          | 184  | 20.8  | Leukocyte transendothelial migration; MAPK signaling pathway; Pancreatic secretion; Ras signaling pathway; Focal adhesion; Long-term potentiation; Chemokine signaling pathway; Platelet activation; Neurotrophin signaling pathway; Rap1 signaling pathway; cA | 103.9 | 102.6 | 105   | 101.8 | 98.4  | 95.1  | 69.9  | 85.3  |
| 309243073 | Foxp1                                          | 576  | 64.5  |                                                                                                                                                                                                                                                                 | 109.7 | 101.2 | 89.2  | 88.5  | 84.6  | 82.4  | 95    | 115.9 |
| 124248577 | Psmc4                                          | 418  | 47.4  | Proteasome; Epstein-Barr virus infection                                                                                                                                                                                                                        | 86.4  | 87.8  | 89.6  | 93.1  | 120.1 | 118.9 | 109.5 | 106   |
| 67846113  | Snrnp70                                        | 448  | 52    | Spliceosome                                                                                                                                                                                                                                                     | 99    | 94.8  | 100.9 | 102.5 | 99.8  | 106.1 | 105.7 | 108.3 |
| 51093840  | Eif3l                                          | 564  | 66.6  |                                                                                                                                                                                                                                                                 | 87.6  | 85.9  | 88.7  | 85.4  | 111.3 | 114.7 | 114.3 | 113.6 |
| 16716509  | Foxp1                                          | 705  | 78.8  |                                                                                                                                                                                                                                                                 | 84    | 82.3  | 78.5  | 78.9  | 110.3 | 110.6 | 123.4 | 122.5 |
| 161086971 | Capza1                                         | 286  | 32.9  | Endocytosis                                                                                                                                                                                                                                                     | 101.3 | 104   | 103.8 | 102.2 | 90.5  | 89.5  | 100.3 | 97    |
| 6755364   | Sub1                                           | 127  | 14.4  |                                                                                                                                                                                                                                                                 | 107   | 107.3 | 107.2 | 107.9 | 90.7  | 91.7  | 92.5  | 93.7  |
| 239916005 | Thop1                                          | 687  | 78    | African trypanosomiasis; Renin-angiotensin system                                                                                                                                                                                                               | 99.7  | 101.8 | 99.3  | 100.9 | 94.4  | 95.1  | 103.8 | 102.4 |
| 54607098  | Sdha                                           | 664  | 72.5  | Citrate cycle (TCA cycle); Metabolic pathways; Huntington's disease; Non-alcoholic fatty liver disease (NAFLD); Oxidative phosphorylation; Parkinson's disease; Alzheimer's disease; Carbon metabolism                                                          | 100.7 | 105.3 | 104.7 | 106   | 100.6 | 100.6 | 98.3  | 99.7  |
| 21313162  | Rab1b                                          | 201  | 22.2  | Legionellosis                                                                                                                                                                                                                                                   | 103.5 | 103.3 | 98.9  | 98.5  | 93.7  | 92.3  | 84.6  | 90.5  |
| 148747410 | Arcn1                                          | 511  | 57.2  |                                                                                                                                                                                                                                                                 | 99.4  | 100.9 | 101   | 100.8 | 95.6  | 96.1  | 97    | 105.1 |
| 24429570  | Xpo5                                           | 1204 | 136.9 | RNA transport                                                                                                                                                                                                                                                   | 92.9  | 91.6  | 89.7  | 87    | 109.2 | 105.3 | 112.3 | 112.2 |
| 153945822 | Rad50                                          | 1312 | 153.5 | Non-homologous end-joining; Homologous recombination                                                                                                                                                                                                            | 111.2 | 113.4 | 93.5  | 98.8  | 102.2 | 103.7 | 102.6 | 94    |
| 12963569  | Ppp1r7                                         | 361  | 41.3  |                                                                                                                                                                                                                                                                 | 107.7 | 108.8 | 98.7  | 98.9  | 92.4  | 94.7  | 103.1 | 99.6  |
| 6681225   | Drg1                                           | 367  | 40.5  |                                                                                                                                                                                                                                                                 | 85.1  | 83.7  | 90.2  | 93.5  | 129.4 | 126.1 | 112.6 | 107.6 |
| 189491668 | Ddx10                                          | 875  | 100.7 |                                                                                                                                                                                                                                                                 | 99.2  | 98.3  | 92.6  | 97.9  | 107.3 | 110.8 | 111.9 | 106.3 |
| 229608895 | Lbr                                            | 626  | 71.4  |                                                                                                                                                                                                                                                                 | 101.1 | 102   | 111.1 | 109.6 | 95.6  | 95.9  | 86.8  | 86.3  |
| 164698481 | Sept9                                          | 576  | 64.7  |                                                                                                                                                                                                                                                                 | 104.4 | 103.8 | 107   | 104.4 | 88.9  | 90.2  | 86.6  | 90.9  |
| 46049022  | Psmc6                                          | 389  | 45.5  | Proteasome; Epstein-Barr virus infection                                                                                                                                                                                                                        | 92    | 89.5  | 93.4  | 93.9  | 113.4 | 114.9 | 105.3 | 105.9 |
| 8394239   | Sart3                                          | 962  | 109.6 |                                                                                                                                                                                                                                                                 | 109.5 | 113.5 | 103.5 | 101.4 | 87.3  | 90.4  | 94.8  | 95.9  |
| 6753490   | Cops4                                          | 406  | 46.3  |                                                                                                                                                                                                                                                                 | 97.2  | 97.9  | 93.4  | 97    | 101.4 | 98.9  | 106   | 104.6 |
| 124487331 | Blvra                                          | 295  | 33.5  | Porphyrin and chlorophyll metabolism                                                                                                                                                                                                                            | 105.7 | 105.7 | 113.4 | 113.7 | 92.8  | 91.1  | 85.9  | 84.7  |
| 149261435 | Eif5;<br>LOC1000<br>47658;<br>LOC1026<br>41436 | 429  | 48.9  | RNA transport                                                                                                                                                                                                                                                   | 98.6  | 101.2 | 100.9 | 101.7 | 91.2  | 92.4  | 96.3  | 97.5  |
| 254587996 | Anp32e                                         | 260  | 29.6  |                                                                                                                                                                                                                                                                 | 100.3 | 96.1  | 100.9 | 103.5 | 92.3  | 97.1  | 104.5 | 104.6 |
| 227116322 | Zc3hav1                                        | 946  | 106.6 |                                                                                                                                                                                                                                                                 | 98.8  | 95.5  | 96.5  | 97.1  | 103.4 | 101.2 | 100.6 | 97    |
| 313151236 | Lig1                                           | 932  | 104   | DNA replication; Nucleotide excision repair; Base excision repair; Mismatch repair                                                                                                                                                                              | 74.4  | 71.7  | 69.7  | 68    | 138.2 | 141.3 | 135.6 | 137.8 |
| 110625761 | Afg3l2                                         | 802  | 89.5  |                                                                                                                                                                                                                                                                 | 169.7 | 106.3 | 123.6 | 100.2 | 97.3  | 105.6 | 85.4  | 98.4  |

|           |                             |      |       |                                                                                                                                                                                                                                                                 |       |       |       |       |       |       |       |       |
|-----------|-----------------------------|------|-------|-----------------------------------------------------------------------------------------------------------------------------------------------------------------------------------------------------------------------------------------------------------------|-------|-------|-------|-------|-------|-------|-------|-------|
| 46593021  | Uqcr1                       | 480  | 52.8  | Metabolic pathways; Huntington's disease; Non-alcoholic fatty liver disease (NAFLD); Oxidative phosphorylation; Parkinson's disease; Alzheimer's disease; Cardiac muscle contraction                                                                            | 104.1 | 109.2 | 105.7 | 107   | 100   | 98.8  | 92.1  | 95.2  |
| 255958156 | Prkacb                      | 398  | 46    |                                                                                                                                                                                                                                                                 | 109.5 | 107.4 | 108.6 | 109.1 | 85.9  | 85    | 86.1  | 86.7  |
| 13386026  | 2700060E<br>02Rik;<br>Rtraf | 244  | 28.1  |                                                                                                                                                                                                                                                                 | 90.7  | 91.7  | 100.6 | 102.2 | 109.3 | 110.7 | 97.2  | 88    |
| 6755728   | Tcea1                       | 301  | 33.9  |                                                                                                                                                                                                                                                                 | 112.4 | 107.1 | 105.5 | 100.6 | 90.4  | 95.8  | 96.3  | 104.8 |
| 149251177 | Gm10071;<br>Rpl13-ps6       | 211  | 24.2  |                                                                                                                                                                                                                                                                 | 84    | 86.1  | 94.6  | 90.5  | 118.9 | 117.3 | 110.1 | 111.8 |
| 14196340  | Ppie                        | 301  | 33.4  | Spliceosome                                                                                                                                                                                                                                                     | 100.9 | 103.1 | 97.8  | 98.9  | 101.5 | 100.4 | 86    | 88.2  |
| 251823891 | Hars                        | 509  | 57.4  | Aminoacyl-tRNA biosynthesis                                                                                                                                                                                                                                     | 109.4 | 118.1 | 94.3  | 94.1  | 103.4 | 101.7 | 105.7 | 104.2 |
| 148747198 | Cars                        | 831  | 94.8  | Aminoacyl-tRNA biosynthesis                                                                                                                                                                                                                                     | 71.7  | 71.3  | 72.6  | 70.9  | 138.4 | 137.4 | 143.3 | 147   |
| 124486606 | Gm12657                     | 136  | 15.2  | Transcriptional misregulation in cancer; Alcoholism; Systemic lupus erythematosus                                                                                                                                                                               | 104.1 | 116.8 | 110.8 | 101   | 89.2  | 89.7  | 92.5  | 97.8  |
| 257467552 | Slk                         | 1233 | 141.4 | Oocyte meiosis                                                                                                                                                                                                                                                  | 109.6 | 107.9 | 90.9  | 90.1  | 107.5 | 103.6 | 109.2 | 108.1 |
| 22122825  | Actr2                       | 394  | 44.7  |                                                                                                                                                                                                                                                                 | 103   | 100.4 | 110   | 111   | 93.7  | 95.2  | 92.4  | 91.3  |
| 6754036   | Got2                        | 430  | 47.4  | Arginine and proline metabolism; Fat digestion and absorption; Metabolic pathways; Phenylalanine, tyrosine and tryptophan biosynthesis; Biosynthesis of amino acids; 2-Oxocarboxylic acid metabolism; Cysteine and methionine metabolism; Carbon metabolism; AI | 98.8  | 97.4  | 100.1 | 93.8  | 97.8  | 96    | 105   | 111.8 |
| 6753950   | Gbp2                        | 589  | 66.7  | NOD-like receptor signaling pathway                                                                                                                                                                                                                             | 80.3  | 77.9  | 78.1  | 73.8  | 142.8 | 142.1 | 132.3 | 140.9 |
| 110625979 | Eef1g                       | 437  | 50    | Legionellosis                                                                                                                                                                                                                                                   | 76.8  | 78.2  | 79.2  | 81.4  | 120.2 | 118.1 | 127.4 | 129   |
| 10181166  | Smarce1                     | 411  | 46.6  |                                                                                                                                                                                                                                                                 | 110.4 | 104   | 94.8  | 93.5  | 95.8  | 99.2  | 105.3 | 104.9 |
| 6755152   | Prep                        | 710  | 80.7  | Renin-angiotensin system                                                                                                                                                                                                                                        | 88.1  | 87.7  | 82.6  | 82.2  | 114.8 | 117.5 | 106.3 | 116   |
| 41351529  | Pigs                        | 555  | 61.7  | Glycosylphosphatidylinositol (GPI)-anchor biosynthesis; Metabolic pathways                                                                                                                                                                                      | 98.1  | 98.6  | 89.6  | 87.6  | 106.7 | 109.8 | 100.4 | 99.3  |
| 156255171 | Add1                        | 735  | 80.6  |                                                                                                                                                                                                                                                                 | 117   | 110.8 | 108.9 | 108.5 | 81.3  | 86.7  | 81    | 83.9  |
| 31560731  | Atp6v1a                     | 617  | 68.3  | mTOR signaling pathway; Rheumatoid arthritis; Metabolic pathways; Phagosome; Oxidative phosphorylation; Synaptic vesicle cycle; Collecting duct acid secretion                                                                                                  | 97.6  | 95.3  | 95    | 99.5  | 100.2 | 103.8 | 105.2 | 102.8 |
| 255069715 | Lap3                        | 519  | 56.1  | Glutathione metabolism; Arginine and proline metabolism; Metabolic pathways                                                                                                                                                                                     | 90.4  | 95.8  | 88.7  | 90.9  | 122.4 | 117.4 | 116.1 | 109.6 |
| 6671557   | Ap1m1                       | 423  | 48.5  | Lysosome                                                                                                                                                                                                                                                        | 102.7 | 102.3 | 105.1 | 103.3 | 103.7 | 103.8 | 92.2  | 95.5  |
| 31980657  | Prpf3                       | 683  | 77.4  | Spliceosome                                                                                                                                                                                                                                                     | 91.1  | 91.9  | 92.9  | 92.1  | 100.3 | 99.2  | 112.3 | 113.2 |
| 33859498  | Umps                        | 481  | 52.3  | Metabolic pathways; Pyrimidine metabolism; Drug metabolism - other enzymes                                                                                                                                                                                      | 78.5  | 78    | 77.5  | 77.9  | 134.5 | 134.4 | 113.5 | 100.2 |
| 47523981  | Npep11                      | 524  | 55.9  |                                                                                                                                                                                                                                                                 | 107.7 | 107.6 | 99.1  | 102.1 | 97.7  | 96.5  | 99.4  | 98.6  |
| 18875338  | Cstf2                       | 580  | 61.3  | mRNA surveillance pathway                                                                                                                                                                                                                                       | 107.3 | 105.2 | 103.3 | 101.7 | 95.8  | 98.2  | 101.8 | 101.9 |
| 22122705  | Gimap7                      | 293  | 33.8  |                                                                                                                                                                                                                                                                 | 103.6 | 109.4 | 113.1 | 111.7 | 83.6  | 84.4  | 79.4  | 81.6  |

|           |                                      |      |       |                                                                                                                                                                                                                                                               |       |       |       |       |       |       |       |       |
|-----------|--------------------------------------|------|-------|---------------------------------------------------------------------------------------------------------------------------------------------------------------------------------------------------------------------------------------------------------------|-------|-------|-------|-------|-------|-------|-------|-------|
| 6680047   | Gnb2l1;<br>Rack1                     | 317  | 35.1  | Measles                                                                                                                                                                                                                                                       | 85.9  | 88.6  | 94.2  | 94.9  | 115.5 | 112.8 | 104.8 | 101.2 |
| 149251501 | LOC1000<br>44829;<br>Fbl;<br>LOC1026 | 327  | 34.3  | Ribosome biogenesis in eukaryotes                                                                                                                                                                                                                             | 102.4 | 98.7  | 105.3 | 109.2 | 100.7 | 100.1 | 92    | 93.5  |
| 127141012 | Mycbp2                               | 4746 | 520.5 |                                                                                                                                                                                                                                                               | 99.5  | 100.6 | 99.8  | 101.2 | 105   | 99.8  | 98.2  | 101.1 |
| 11596855  | Tfrc                                 | 763  | 85.7  | Endocytosis; Phagosome; HIF-1 signaling pathway;<br>Hematopoietic cell lineage                                                                                                                                                                                | 43.5  | 47    | 43.1  | 43.4  | 170.3 | 169.1 | 175.6 | 171.1 |
| 219842353 | Ago2;<br>Eif2c2                      | 860  | 97.2  |                                                                                                                                                                                                                                                               | 107.6 | 109.7 | 100.8 | 101.1 | 91.8  | 92.8  | 89.8  | 86.8  |
| 21313144  | Ola1                                 | 396  | 44.7  |                                                                                                                                                                                                                                                               | 86    | 87.3  | 88.2  | 86.4  | 111   | 108   | 111.2 | 112.1 |
| 146231944 | Rif1                                 | 2426 | 267   | Signaling pathways regulating pluripotency of stem cells                                                                                                                                                                                                      | 89.9  | 93.4  | 91.2  | 90.9  | 113.7 | 112.6 | 117   | 120.3 |
| 31981163  | Ddx18                                | 660  | 74.1  |                                                                                                                                                                                                                                                               | 90.3  | 90.9  | 92.2  | 93.4  | 111.5 | 112   | 111.2 | 109.3 |
| 6754976   | Prdx1                                | 199  | 22.2  | Peroxisome                                                                                                                                                                                                                                                    | 95.4  | 97.1  | 99.1  | 99.6  | 100.9 | 100.4 | 104.6 | 102.3 |
| 170650609 | Inpp1                                | 396  | 43.3  | Metabolic pathways; Inositol phosphate metabolism;<br>Phosphatidylinositol signaling system                                                                                                                                                                   | 103.8 | 103.1 | 110.9 | 112   | 89.5  | 91.9  | 87.4  | 87.8  |
| 6679587   | Rab1;<br>Rab1a                       | 205  | 22.7  | Legionellosis                                                                                                                                                                                                                                                 | 96.3  | 96.8  | 100.3 | 97.7  | 108.1 | 105   | 102.3 | 102.2 |
| 8394490   | Tsnax                                | 290  | 32.9  |                                                                                                                                                                                                                                                               | 142.3 | 168.6 | 96.9  | 93.6  | 82    | 76.8  | 87.2  | 77.6  |
| 71037403  | Myl12a                               | 172  | 19.9  | Leukocyte transendothelial migration; Regulation of actin<br>cytoskeleton; Focal adhesion; Platelet activation; Tight<br>junction                                                                                                                             | 97.6  | 98.4  | 97.1  | 96.1  | 97.6  | 96.4  | 96.3  | 96.7  |
| 7304855   | Actn3                                | 900  | 103   | Leukocyte transendothelial migration; Regulation of actin<br>cytoskeleton; Arrhythmogenic right ventricular<br>cardiomyopathy (ARVC); Focal adhesion; Adherens<br>junction; Tight junction; Systemic lupus erythematosus;<br>Amoebiasis; Viral carcinogenesis | 75.1  |       | 137.3 |       | 100.2 |       | 83.8  |       |
| 9256519   | Rplp1                                | 114  | 11.5  | Ribosome                                                                                                                                                                                                                                                      | 72.5  | 69.3  | 89.3  | 85    | 112.7 | 114.8 | 125.5 | 126.2 |
| 226342873 | Brd4                                 | 1400 | 155.8 |                                                                                                                                                                                                                                                               | 108.9 | 102.8 | 104.8 | 102.8 | 91.8  | 91.1  | 89    | 93.9  |
| 31543918  | Ube2v2                               | 145  | 16.4  |                                                                                                                                                                                                                                                               | 105.4 | 112.8 | 108.8 | 113.7 | 86.5  | 76.7  | 105.2 | 100.8 |
| 124486712 | Rrbp1                                | 1464 | 158.3 | Protein processing in endoplasmic reticulum                                                                                                                                                                                                                   | 96.4  | 95.9  | 86.5  | 99.4  | 107.1 | 108.4 | 119.7 | 110.5 |
| 6755985   | Vrk1                                 | 440  | 49.7  |                                                                                                                                                                                                                                                               | 112.2 | 106.5 | 104.2 | 104.6 | 96.5  | 91.4  | 102.4 | 96.2  |
| 55741460  | Park7                                | 189  | 20    | Parkinson's disease                                                                                                                                                                                                                                           | 125.4 | 128   | 132.6 | 129.4 | 71.9  | 70.6  | 76.9  | 77.9  |
| 85861260  | Emc1                                 | 994  | 111.2 |                                                                                                                                                                                                                                                               | 95.6  | 87.3  | 84.3  | 86.3  | 119.2 | 116.5 | 94.3  | 105   |
| 254692993 | Tmem173                              | 378  | 42.8  | NOD-like receptor signaling pathway; RIG-I-like receptor<br>signaling pathway; Cytosolic DNA-sensing pathway                                                                                                                                                  | 114.6 | 113   | 107.3 | 105.3 | 91.5  | 93.7  | 89.5  | 91.4  |

|           |                                                                                                                                                                                                 |      |       |                                                                                                                                                                                                                                                |       |       |       |       |       |       |       |       |
|-----------|-------------------------------------------------------------------------------------------------------------------------------------------------------------------------------------------------|------|-------|------------------------------------------------------------------------------------------------------------------------------------------------------------------------------------------------------------------------------------------------|-------|-------|-------|-------|-------|-------|-------|-------|
| 306482623 | Hist1h4;<br>Hist1h4a;<br>Hist1h4k;<br>Hist1h4c;<br>Hist1h4i;<br>Hist1h4n;<br>Hist1h4h;<br>Hist1h4f;<br>Hist1h4j;<br>Hist1h4b;<br>Hist1h4m;<br>Hist1h4d;<br>Hist2h4;<br>LOC100862646;<br>LOC1026 | 103  | 11.4  | Alcoholism; Systemic lupus erythematosus; Viral carcinogenesis                                                                                                                                                                                 | 103.2 | 103.7 | 109.9 | 109.1 | 83.8  | 85.4  | 93.5  | 90    |
| 13385168  | Uqcrfs1                                                                                                                                                                                         | 274  | 29.3  | Metabolic pathways; Huntington's disease; Non-alcoholic fatty liver disease (NAFLD); Oxidative phosphorylation; Parkinson's disease; Alzheimer's disease; Cardiac muscle contraction                                                           | 110   | 110.2 | 106.5 | 106.4 | 99.6  | 98.1  | 87.2  | 86    |
| 112734855 | Top1                                                                                                                                                                                            | 767  | 90.8  |                                                                                                                                                                                                                                                | 86.4  | 86.6  | 89.1  | 89    | 110.7 | 109.3 | 118.8 | 118.7 |
| 114145561 | Krt8                                                                                                                                                                                            | 490  | 54.5  |                                                                                                                                                                                                                                                | 63.2  | 41.4  | 47.9  | 32.8  | 81    | 69.5  | 54    | 35.1  |
| 21704100  | Hadhb                                                                                                                                                                                           | 475  | 51.4  | Fatty acid metabolism; Valine, leucine and isoleucine degradation; Metabolic pathways; Fatty acid degradation; Fatty acid elongation                                                                                                           | 102.8 | 104.9 | 112   | 112.3 | 94.9  | 95.5  | 90.1  | 86.5  |
| 40254610  | Stag1                                                                                                                                                                                           | 1258 | 144.3 | Cell cycle                                                                                                                                                                                                                                     | 106.4 | 106.1 | 104.1 | 101.6 | 100.7 | 102.2 | 89.9  | 92.7  |
| 13385288  | Crnk1l                                                                                                                                                                                          | 690  | 83.4  | Spliceosome                                                                                                                                                                                                                                    | 91.4  | 97.6  | 95.6  | 94    | 101.6 | 101.9 | 105.5 | 102.6 |
| 295148172 | Madd                                                                                                                                                                                            | 1627 | 180.9 |                                                                                                                                                                                                                                                | 108.3 | 113.9 | 100.2 | 104.2 | 97.6  | 103   | 93.5  | 91.4  |
| 31982511  | Adh5                                                                                                                                                                                            | 374  | 39.5  | Drug metabolism - cytochrome P450; Retinol metabolism; Metabolic pathways; Fatty acid degradation; Glycolysis / Gluconeogenesis; Carbon metabolism; Chemical carcinogenesis; Tyrosine metabolism; Metabolism of xenobiotics by cytochrome P450 | 109.9 | 108.4 | 111.4 | 114.5 | 84.1  | 86    | 87.3  | 89.8  |
| 21703922  | Stk24                                                                                                                                                                                           | 431  | 47.9  |                                                                                                                                                                                                                                                | 109.2 | 123.5 | 104.7 | 105.6 | 86.2  | 81.1  | 88.8  | 85.2  |
| 160333360 | Sin3a                                                                                                                                                                                           | 1277 | 145.4 |                                                                                                                                                                                                                                                | 96.8  | 96.8  | 101.1 | 100.7 | 101.6 | 103.5 | 97    | 97.8  |
| 31980942  | Impa1                                                                                                                                                                                           | 277  | 30.4  | Metabolic pathways; Inositol phosphate metabolism; Phosphatidylinositol signaling system                                                                                                                                                       | 110.3 | 109   | 110.1 | 108.6 | 85    | 84.5  | 91.8  | 89.7  |
| 31981810  | Eci1                                                                                                                                                                                            | 289  | 32.2  | Fatty acid degradation                                                                                                                                                                                                                         | 109.7 | 116.8 | 107.1 | 108.6 | 92.7  | 97.2  | 90.2  | 90.9  |
| 229093990 | Rnf40                                                                                                                                                                                           | 1001 | 113.9 |                                                                                                                                                                                                                                                | 94.9  | 101.6 | 98.1  | 91.3  | 101   | 103.9 | 97.4  | 118   |
| 6678581   | Was                                                                                                                                                                                             | 520  | 54.2  | Endocytosis; Regulation of actin cytoskeleton; Chemokine signaling pathway; Adherens junction; Salmonella infection; Fc gamma R-mediated phagocytosis; Choline metabolism in cancer; Bacterial invasion of epithelial cells                    | 107   | 105.4 | 104.5 | 105.6 | 90.5  | 90.7  | 93    | 91.6  |

|           |                                    |      |       |                                                                                                                                                                                                                                                                 |       |       |       |       |       |       |       |       |
|-----------|------------------------------------|------|-------|-----------------------------------------------------------------------------------------------------------------------------------------------------------------------------------------------------------------------------------------------------------------|-------|-------|-------|-------|-------|-------|-------|-------|
| 6678131   | Srm                                | 302  | 34    | Glutathione metabolism; Arginine and proline metabolism; Metabolic pathways; Cysteine and methionine metabolism; beta-Alanine metabolism                                                                                                                        | 90.9  | 89.7  | 84.2  | 81.8  | 120.9 | 116.1 | 122.2 | 124.2 |
| 27370144  | Gbp9                               | 619  | 71.3  |                                                                                                                                                                                                                                                                 | 104.7 | 103.2 | 100.5 | 101   | 94.2  | 92.3  | 91    | 89.2  |
| 257153445 | Elac2                              | 831  | 92.7  | RNA transport                                                                                                                                                                                                                                                   | 98.7  | 96.7  | 99.3  | 96.7  | 109.6 | 110.4 | 112.5 | 109.5 |
| 84662736  | Rpl6                               | 296  | 33.5  | Ribosome                                                                                                                                                                                                                                                        | 84.6  | 84.5  | 89    | 87.7  | 109.6 | 110.7 | 116.2 | 119.5 |
| 33468931  | Sars                               | 536  | 61.1  |                                                                                                                                                                                                                                                                 | 86.3  | 86.9  | 87.3  | 86.3  | 113.2 | 115.3 | 108.2 | 108.2 |
| 160298213 | Gsr                                | 500  | 53.6  | Glutathione metabolism; Thyroid hormone synthesis                                                                                                                                                                                                               | 115.6 | 120   | 127.1 | 121.7 | 93.8  | 91.5  | 77.6  | 76.3  |
| 6753262   | Capzb                              | 272  | 30.6  |                                                                                                                                                                                                                                                                 | 103.1 | 99.9  | 107.2 | 110.6 | 96.4  | 92.9  | 89.2  | 88.9  |
| 407262909 | Rps6-ps4;<br>Rps6;<br>LOC105244208 | 249  | 28.7  | mTOR signaling pathway; Ribosome; Insulin signaling pathway; Proteoglycans in cancer; HIF-1 signaling pathway; PI3K-Akt signaling pathway; EGFR tyrosine kinase inhibitor resistance                                                                            | 79.5  | 83    | 86.7  | 88.8  | 117.8 | 115.8 | 122.1 | 121   |
| 19527358  | Prpf19                             | 504  | 55.2  | Ubiquitin mediated proteolysis; Spliceosome                                                                                                                                                                                                                     | 89.6  | 92.3  | 90    | 91.7  | 106.1 | 104.5 | 109.7 | 105.3 |
| 33563288  | Ccar1                              | 1146 | 132   |                                                                                                                                                                                                                                                                 | 100.5 | 99.7  | 101.9 | 101   | 95.7  | 97.8  | 98.4  | 95.9  |
| 146149191 | Snw1                               | 536  | 61.4  | Epstein-Barr virus infection; Spliceosome; Notch signaling pathway; Viral carcinogenesis                                                                                                                                                                        | 101.3 | 102.4 | 92.3  | 99    | 101.4 | 96.9  | 114.5 | 109.9 |
| 68226731  | Npepps                             | 920  | 103.3 |                                                                                                                                                                                                                                                                 | 98.1  | 99.4  | 102.4 | 102.7 | 98.3  | 103.3 | 100.3 | 98.1  |
| 238637279 | Slc3a2                             | 526  | 58.3  | mTOR signaling pathway; Protein digestion and absorption                                                                                                                                                                                                        | 60    | 57.5  | 57.5  | 55.3  | 145.8 | 147.9 | 155.9 | 159.7 |
| 312596940 | Snx5                               | 404  | 46.8  | Endocytosis                                                                                                                                                                                                                                                     | 97.8  | 98    | 103.2 | 106.9 | 98.5  | 103   | 102.7 | 97.1  |
| 21450053  | Fam49b                             | 324  | 36.8  |                                                                                                                                                                                                                                                                 | 117.7 | 117.7 | 116   | 112   | 75.5  | 81    | 88.8  | 93.2  |
| 158937298 | Ikbkap                             | 1333 | 149.5 |                                                                                                                                                                                                                                                                 | 89.5  | 93.8  | 87.5  | 84.6  | 115.2 | 113.1 | 109.6 | 112.2 |
| 124286826 | Etf1                               | 437  | 49    | mRNA surveillance pathway                                                                                                                                                                                                                                       | 82.3  | 81.3  | 84.4  | 84.4  | 120.6 | 118.6 | 121.1 | 121.4 |
| 6756085   | Zyx                                | 564  | 60.5  | Focal adhesion                                                                                                                                                                                                                                                  | 118.4 | 121   | 111.7 | 110.4 | 78.2  | 78.3  | 91.7  | 96.5  |
| 13994195  | Ppp1ca                             | 330  | 37.5  | Oxytocin signaling pathway; mRNA surveillance pathway; Herpes simplex infection; Regulation of actin cytoskeleton; Dopaminergic synapse; Focal adhesion; Insulin signaling pathway; Long-term potentiation; Amphetamine addiction; Hippo signaling pathway; Pla | 98.8  | 100.3 | 110.9 | 112.7 | 95.8  | 99.7  | 94.6  | 95.4  |
| 225543420 | Arhgap1                            | 439  | 50.4  |                                                                                                                                                                                                                                                                 | 99.1  | 101.4 | 98.5  | 97.5  | 90.8  | 89.2  | 88.7  | 87.4  |
| 33942089  | Atxn2l                             | 1049 | 110.6 |                                                                                                                                                                                                                                                                 | 88.6  | 86.1  | 85.3  | 83.9  | 112.1 | 111.7 | 125.1 | 127.3 |
| 160333553 | Rpl12                              | 165  | 17.8  | Ribosome                                                                                                                                                                                                                                                        | 83.9  | 87.7  | 92.9  | 91.9  | 109   | 106.1 | 100   | 100   |
| 6679583   | Rab11b                             | 218  | 24.5  | Endocytosis; AMPK signaling pathway; Vasopressin-regulated water reabsorption                                                                                                                                                                                   | 98.1  | 97.6  | 102.9 | 101.2 | 95.4  | 97.6  | 96    | 96.1  |
| 21311939  | Cmtr1;<br>Ftsjd2                   | 837  | 95.6  |                                                                                                                                                                                                                                                                 | 104.7 | 106.4 | 98.6  | 98.3  | 97.6  | 98    | 99.9  | 97.6  |
| 244790018 | Parvg                              | 384  | 43.3  |                                                                                                                                                                                                                                                                 | 84.3  | 94.1  | 80.2  | 88.4  | 99.3  | 101.6 | 102.7 | 109.1 |
| 329755243 | Gsn                                | 731  | 80.7  |                                                                                                                                                                                                                                                                 | 96.8  | 100.3 | 105.4 | 104.7 | 97.4  | 91.1  | 83.4  | 86.6  |
| 239052674 | Mvp                                | 870  | 96.8  |                                                                                                                                                                                                                                                                 | 107.8 | 106.6 | 90.7  | 88.9  | 101.8 | 106.3 | 103.5 | 101.8 |
| 30520043  | Themis                             | 636  | 72.7  |                                                                                                                                                                                                                                                                 | 114.7 | 110.1 | 119.7 | 122.3 | 81.5  | 81    | 79.4  | 76    |
| 30410010  | Dhx38                              | 1228 | 140.5 | Spliceosome                                                                                                                                                                                                                                                     | 105.2 | 104.8 | 105   | 102.4 | 100.9 | 96.1  | 95.2  | 94.5  |
| 16716349  | Nup62                              | 526  | 53.2  | RNA transport                                                                                                                                                                                                                                                   | 89.2  | 91.4  | 87.5  | 88    | 114   | 112.2 | 114.1 | 114.6 |

|           |              |      |       |                                                                                                                                                                                                                                                                 |       |       |       |       |       |       |       |       |
|-----------|--------------|------|-------|-----------------------------------------------------------------------------------------------------------------------------------------------------------------------------------------------------------------------------------------------------------------|-------|-------|-------|-------|-------|-------|-------|-------|
| 227500281 | Etfa         | 333  | 35    |                                                                                                                                                                                                                                                                 | 105   | 103.4 | 101.5 | 102.3 | 100.5 | 99.8  | 107.2 | 103.8 |
| 22122685  | Ppp1r8       | 351  | 38.5  |                                                                                                                                                                                                                                                                 | 105.3 | 106.2 | 100.8 | 100.4 | 88.2  | 89    | 98    | 98.7  |
| 170763467 | Timm44       | 452  | 51.1  |                                                                                                                                                                                                                                                                 | 98.6  | 99.4  | 96.1  | 94.2  | 108.9 | 107.5 | 103.9 | 106   |
| 28144914  | Gimap9       | 291  | 33.3  |                                                                                                                                                                                                                                                                 | 103.4 | 102.9 | 104.6 | 107.9 | 87.5  | 86.6  | 89.9  | 87.3  |
| 6671561   | Ap2a1        | 977  | 107.6 | Endocytosis; Endocrine and other factor-regulated calcium reabsorption; Huntington's disease; Synaptic vesicle cycle                                                                                                                                            | 101.8 | 103.7 | 99.2  | 95.7  | 93    | 97.9  | 103.4 | 101.7 |
| 119433657 | Hist2h2ab    | 130  | 14    | Alcoholism; Systemic lupus erythematosus                                                                                                                                                                                                                        | 120.3 | 127.5 | 108.6 | 96.7  | 83.3  | 84.4  | 52.1  | 49.5  |
| 229576825 | Ikbkb        | 757  | 86.7  | FoxO signaling pathway; Acute myeloid leukemia; mTOR signaling pathway; Herpes simplex infection; Chagas disease (American trypanosomiasis); T cell receptor signaling pathway; MAPK signaling pathway; Type II diabetes mellitus; MicroRNAs in cancer; Ras sig | 114.1 | 109.9 | 118   | 121.4 | 89.4  | 93.5  | 82.8  | 82.6  |
| 31982330  | Golga3       | 1447 | 162.8 |                                                                                                                                                                                                                                                                 | 101.3 | 99.8  | 97.9  | 104.3 | 99.9  | 102.3 | 102.9 | 99.2  |
| 256773220 | Synj1        | 1607 | 176.2 |                                                                                                                                                                                                                                                                 | 102.2 | 97.8  | 101.1 | 100.7 | 100.1 | 106.3 | 105.1 | 108   |
| 407264228 | LOC101056140 | 492  | 53.4  |                                                                                                                                                                                                                                                                 | 86.5  | 84    | 82.8  | 83.4  | 100.3 | 101.4 | 120.8 | 121.7 |
| 9790013   | Aatf         | 526  | 59.4  |                                                                                                                                                                                                                                                                 | 96.6  | 93.3  | 89.3  | 96.7  | 110.1 | 109.6 | 112   | 110.1 |
| 116256512 | Hnrnpd       | 355  | 38.3  |                                                                                                                                                                                                                                                                 | 102.3 | 100.6 | 111.7 | 114.5 | 82.7  | 84.3  | 93.4  | 96.4  |
| 6756037   | Ywhah        | 246  | 28.2  | Epstein-Barr virus infection; Hippo signaling pathway; Oocyte meiosis; Cell cycle; PI3K-Akt signaling pathway; Viral carcinogenesis                                                                                                                             | 108.4 | 116.4 | 99.9  | 130.2 | 93.6  | 79.7  | 100.7 | 92    |
| 124430514 | Ddx23        | 819  | 95.4  | Spliceosome                                                                                                                                                                                                                                                     | 98.9  | 100   | 102.5 | 101   | 100.3 | 100.1 | 98.1  | 101.5 |
| 153945880 | Ep400        | 3035 | 333.2 |                                                                                                                                                                                                                                                                 | 99.2  | 104.7 | 100.8 | 103.9 | 102.9 | 103.3 | 97    | 95.4  |
| 116686118 | Gimap8       | 688  | 76.8  |                                                                                                                                                                                                                                                                 | 105.2 | 107.6 | 103.2 | 105.4 | 92.4  | 92.9  | 93    | 89.6  |
| 15617203  | Clic1        | 241  | 27    |                                                                                                                                                                                                                                                                 | 107.1 | 105.9 | 110.3 | 108.9 | 85.8  | 88    | 87.3  | 89.4  |
| 7949018   | Cdc37        | 379  | 44.6  | PI3K-Akt signaling pathway                                                                                                                                                                                                                                      | 95.1  | 94.1  | 99.4  | 100.2 | 96    | 100.8 | 115.6 | 109.5 |
| 62990166  | Smc2         | 1191 | 134.2 |                                                                                                                                                                                                                                                                 | 71.9  | 83.5  | 72.6  | 68.8  | 131.9 | 129.7 | 144   | 146.8 |
| 21450213  | Aarsd1       | 412  | 44.9  |                                                                                                                                                                                                                                                                 | 98.4  | 97.1  | 94.7  | 97.6  | 114.4 | 115.9 | 106.7 | 113.8 |
| 6679353   | Prkcq        | 707  | 81.5  | T cell receptor signaling pathway; Insulin resistance; Adipocytokine signaling pathway; NF-kappa B signaling pathway; Vascular smooth muscle contraction; Tight junction; Th1 and Th2 cell differentiation; Measles; Inflammatory mediator regulation of TRP ch | 115.7 | 113.7 | 111.1 | 111.2 | 89.2  | 90.1  | 79.2  | 80.8  |
| 48928014  | Usp47        | 1356 | 154.7 |                                                                                                                                                                                                                                                                 | 100   | 95.2  | 97.9  | 94.6  | 103.5 | 103.9 | 103.5 | 108.3 |
| 124249330 | Ddx27        | 760  | 85.9  |                                                                                                                                                                                                                                                                 | 91    | 96.2  | 81.9  | 85.8  | 123   | 119.9 | 121.9 | 114.7 |
| 167234435 | Eml4         | 988  | 109.9 |                                                                                                                                                                                                                                                                 | 95.4  | 97.7  | 90.5  | 95.1  | 104.7 | 101.3 | 113.7 | 112.6 |
| 22779924  | Rbm17        | 405  | 45.3  | Spliceosome                                                                                                                                                                                                                                                     | 99.2  | 99.3  | 96.2  | 97.3  | 107.6 | 107.4 | 104.2 | 105.2 |
| 7710014   | Cul3         | 768  | 88.9  | Ubiquitin mediated proteolysis; Hedgehog signaling pathway                                                                                                                                                                                                      | 97.5  | 99.9  | 92.5  | 94.5  | 99.1  | 98.4  | 97.9  | 98.9  |
| 31559918  | Nrd1         | 1161 | 132.8 |                                                                                                                                                                                                                                                                 | 90.3  | 91.4  | 86.8  | 88.7  | 118.9 | 116   | 114.3 | 112.2 |
| 42741690  | Ube2v1       | 147  | 16.3  |                                                                                                                                                                                                                                                                 | 112.4 | 113.6 | 111.1 | 109.5 | 81.9  | 81.8  | 94    | 93.6  |
| 195976788 | Rtf1         | 715  | 80.7  |                                                                                                                                                                                                                                                                 | 100.4 | 101.3 | 102.5 | 101.3 | 98    | 96.5  | 88.4  | 90.6  |

|           |                                         |      |       |                                                                                                                                                                                                                                                                 |       |       |       |       |       |       |       |       |
|-----------|-----------------------------------------|------|-------|-----------------------------------------------------------------------------------------------------------------------------------------------------------------------------------------------------------------------------------------------------------------|-------|-------|-------|-------|-------|-------|-------|-------|
| 31981515  | Rpl7                                    | 270  | 31.4  | Ribosome                                                                                                                                                                                                                                                        | 85.8  | 84.1  | 91.5  | 92.6  | 111.4 | 114.9 | 114.5 | 114.7 |
| 254540082 | Psmb4                                   | 264  | 29.1  | Proteasome                                                                                                                                                                                                                                                      | 103.4 | 101.5 | 101.4 | 99.4  | 94    | 98.7  | 98.3  | 98.8  |
| 12746442  | Eefsec                                  | 583  | 63.5  |                                                                                                                                                                                                                                                                 | 102.6 | 98.1  | 102.6 | 104.7 | 99.7  | 97.7  | 89.3  | 89.9  |
| 134032014 | Gbp7                                    | 638  | 72.7  | NOD-like receptor signaling pathway                                                                                                                                                                                                                             | 105.2 | 104.4 | 99.2  | 95.7  | 100.9 | 105.1 | 99.4  | 98.3  |
| 255958202 | Tbc1d15                                 | 671  | 76.5  |                                                                                                                                                                                                                                                                 | 99.1  | 99.6  | 102.6 | 95.7  | 111.7 | 106   | 92.8  | 96.1  |
| 7106387   | Psm5                                    | 241  | 26.4  | Proteasome                                                                                                                                                                                                                                                      | 100.9 | 99.4  | 97.5  | 99.2  | 100.1 | 96.5  | 104.9 | 107.7 |
| 31982300  | Beta-s;<br>Hbb-bs;<br>Hbb-bt;<br>Hbb-bl | 147  | 15.7  | African trypanosomiasis; Malaria                                                                                                                                                                                                                                | 259.5 | 250.1 | 177.7 | 165   | 56.1  | 61.4  | 49.5  | 55.8  |
| 6755448   | Sec22b                                  | 215  | 24.7  | Phagosome; SNARE interactions in vesicular transport;<br>Legionellosis                                                                                                                                                                                          | 100.8 | 97.1  | 98    | 97.5  | 97.2  | 98.2  | 97.1  | 95.5  |
| 8393762   | Cpsf2                                   | 782  | 88.3  | mRNA surveillance pathway                                                                                                                                                                                                                                       | 103.8 | 99.2  | 100.7 | 99.1  | 101.2 | 98.9  | 92.3  | 103.3 |
| 21703972  | Me2                                     | 589  | 65.8  | Pyruvate metabolism; Carbon metabolism                                                                                                                                                                                                                          | 107.2 | 104.8 | 106.1 | 101.6 | 91.5  | 91.6  | 93.7  | 96.5  |
| 21703762  | Eif3m                                   | 374  | 42.5  |                                                                                                                                                                                                                                                                 | 89.1  | 91.1  | 89.5  | 95.5  | 110.1 | 106.2 | 111.8 | 112.9 |
| 18152793  | Pdhh                                    | 359  | 38.9  | Pyruvate metabolism; Citrate cycle (TCA cycle); Metabolic pathways; Glycolysis / Gluconeogenesis; HIF-1 signaling pathway; Carbon metabolism; Central carbon metabolism in cancer; Glucagon signaling pathway                                                   | 108.7 | 107   | 106.1 | 106.7 | 94.7  | 95.5  | 97.6  | 96.7  |
| 38490690  | Iars2                                   | 1012 | 112.7 | Aminoacyl-tRNA biosynthesis                                                                                                                                                                                                                                     | 109   | 115.9 | 107.3 | 108.4 | 97.5  | 94.6  | 91.2  | 91.8  |
| 10946932  | Nup160                                  | 1402 | 158.1 | RNA transport                                                                                                                                                                                                                                                   | 97.9  | 97.1  | 95.1  | 98.6  | 107.2 | 106.4 | 94.1  | 95.8  |
| 110625886 | Ppp2r2a                                 | 447  | 51.7  | mRNA surveillance pathway; Chagas disease (American trypanosomiasis); Dopaminergic synapse; Hippo signaling pathway; Sphingolipid signaling pathway; Hepatitis C; PI3K-Akt signaling pathway; AMPK signaling pathway; Tight junction; Adrenergic signaling in c | 94.9  | 91.1  | 92.6  | 91.1  | 101.2 | 104.6 | 112.2 | 109.9 |
| 254675240 | Exosc8                                  | 280  | 30.4  |                                                                                                                                                                                                                                                                 | 98.5  | 101.2 | 101.2 | 102.6 | 104.3 | 102.9 | 93.8  | 93.4  |
| 23956166  | Luc7l3                                  | 491  | 58.4  |                                                                                                                                                                                                                                                                 | 96.9  | 98.2  | 100.5 | 98.8  | 98.1  | 98.3  | 97.6  | 103.1 |
| 125656163 | Thoc2                                   | 1594 | 182.7 | Spliceosome; RNA transport                                                                                                                                                                                                                                      | 91.5  | 94.2  | 98.9  | 98.9  | 102.2 | 105.3 | 101.5 | 102.7 |
| 41054806  | Gnai2                                   | 355  | 40.5  | Oxytocin signaling pathway; Leukocyte transendothelial migration; Morphine addiction; Cholinergic synapse; Chagas disease (American trypanosomiasis); Retrograde endocannabinoid signaling; Dopaminergic synapse; Progesterone-mediated oocyte maturation; GABA | 99.8  | 94.5  | 100.3 | 98    | 94.5  | 95.2  | 87.4  | 86.7  |
| 194328773 | Smardc2                                 | 531  | 59    |                                                                                                                                                                                                                                                                 | 97.9  | 100.5 | 102.2 | 103.3 | 100.6 | 101.1 | 95.1  | 96.5  |
| 19526912  | St13                                    | 371  | 41.6  |                                                                                                                                                                                                                                                                 | 90.6  | 93.7  | 89.9  | 88.2  | 102.5 | 96    | 115.3 | 111.6 |
| 30424591  | Ilvbl                                   | 632  | 68.1  |                                                                                                                                                                                                                                                                 | 106.2 | 105.2 | 90.1  | 95.9  | 99.2  | 108   | 99.9  | 99.4  |
| 6755688   | Stxbp2                                  | 593  | 66.3  |                                                                                                                                                                                                                                                                 | 97.6  | 100   | 93.4  | 103   | 96    | 95.5  | 98.7  | 96.9  |
| 10092608  | Gstp1                                   | 210  | 23.6  | Glutathione metabolism; Platinum drug resistance; Drug metabolism - cytochrome P450; Chemical carcinogenesis; Metabolism of xenobiotics by cytochrome P450; Prostate cancer                                                                                     | 118.8 | 119.4 | 119.7 | 114.8 | 72.5  | 82.1  | 80.4  | 87    |
| 34328119  | Gabpa                                   | 454  | 51.3  |                                                                                                                                                                                                                                                                 | 140.3 | 116.8 | 99.1  | 101.7 | 85.4  | 94.8  | 94.1  | 95    |

|           |                                                         |      |       |                                                                                                                                                                                                                                                                 |       |       |       |       |       |       |       |       |
|-----------|---------------------------------------------------------|------|-------|-----------------------------------------------------------------------------------------------------------------------------------------------------------------------------------------------------------------------------------------------------------------|-------|-------|-------|-------|-------|-------|-------|-------|
| 33563282  | Psm1                                                    | 263  | 29.5  | Proteasome                                                                                                                                                                                                                                                      | 90.4  | 98.7  | 100.6 | 98.7  | 107.9 | 100.2 | 103.6 | 100.4 |
| 27229055  | 2310003F<br>16Rik;<br>Hvbk                              | 129  | 14.7  |                                                                                                                                                                                                                                                                 | 109.9 | 115.5 | 94    | 95.7  | 103.1 | 102.9 | 110.2 | 98.2  |
| 30795222  | Gatad2a                                                 | 630  | 67.4  |                                                                                                                                                                                                                                                                 | 106.9 | 102.4 | 106.7 | 104.7 | 96.5  | 135.7 | 102.5 | 93.7  |
| 34447211  | Rad23a                                                  | 362  | 39.6  | Nucleotide excision repair; Protein processing in endoplasmic reticulum                                                                                                                                                                                         | 115.6 | 116.3 | 110.1 | 110.8 | 80.2  | 82.1  | 99.4  | 95.2  |
| 149274885 | D10Jnu81<br>e;<br>LOC1000<br>46684;<br>LOC1026<br>41949 | 266  | 28.1  |                                                                                                                                                                                                                                                                 | 121.4 | 116.3 | 125.5 | 121.8 | 73.6  | 77.5  | 83.9  | 88.6  |
| 356582299 | Sp110                                                   | 445  | 50.1  |                                                                                                                                                                                                                                                                 | 112.4 | 119.4 | 106.5 | 102.9 | 82.9  | 82.3  | 89.5  | 89.9  |
| 12963591  | Stoml2                                                  | 353  | 38.4  |                                                                                                                                                                                                                                                                 | 103.4 | 106.6 | 96    | 86.8  | 115.7 | 127.7 | 111   | 115.8 |
| 25092662  | Vps25                                                   | 176  | 20.7  | Endocytosis                                                                                                                                                                                                                                                     | 102.7 | 105.6 | 95.2  | 95.1  | 100.4 | 99.8  | 108.3 | 106.1 |
| 6755368   | Rps18                                                   | 152  | 17.7  | Ribosome                                                                                                                                                                                                                                                        | 84.5  | 86.3  | 90.5  | 88.8  | 110.1 | 109.1 | 109.6 | 119   |
| 7305443   | Rpl7a                                                   | 266  | 30    | Ribosome                                                                                                                                                                                                                                                        | 79.7  | 77.4  | 90.2  | 92.3  | 115.8 | 116.7 | 117.8 | 115.9 |
| 146134507 | Ylpm1                                                   | 2139 | 240.9 |                                                                                                                                                                                                                                                                 | 103.3 | 109.7 | 102.7 | 100   | 105.3 | 95.8  | 88.4  | 86.1  |
| 163644277 | Ap2a2                                                   | 938  | 104   | Endocytosis; Endocrine and other factor-regulated calcium reabsorption; Huntington's disease; Synaptic vesicle cycle                                                                                                                                            | 96.2  | 96.5  | 96    | 96.5  | 97.2  | 96.6  | 102.1 | 95.1  |
| 21312520  | Qdpr;<br>LOC1026<br>43271                               | 241  | 25.6  | Metabolic pathways; Folate biosynthesis                                                                                                                                                                                                                         | 104.6 | 97.6  | 113.3 | 119.9 | 94.6  | 103.8 | 90.4  | 83.9  |
| 75750501  | Tsc22d4                                                 | 387  | 40    |                                                                                                                                                                                                                                                                 | 108.4 | 107.3 | 106.7 | 106   | 91.7  | 92.7  | 95.6  | 93.9  |
| 227908784 | Eftud1;<br>Efl1                                         | 1127 | 125.7 | Ribosome biogenesis in eukaryotes                                                                                                                                                                                                                               | 96.5  | 94    | 87.3  | 89.3  | 104.9 | 100.9 | 112.7 | 107.7 |
| 312433980 | Herc4                                                   | 1057 | 118.3 | Ubiquitin mediated proteolysis                                                                                                                                                                                                                                  | 103.4 | 101.3 | 102.3 | 99.7  | 99.5  | 104.6 | 88.4  | 95.4  |
| 34328077  | Rprd1b                                                  | 325  | 36.8  |                                                                                                                                                                                                                                                                 | 111.6 | 110.2 | 104.6 | 106.5 | 88.1  | 86.5  | 92.4  | 92.7  |
| 6755252   | Purb                                                    | 324  | 33.9  |                                                                                                                                                                                                                                                                 | 94    | 91.4  | 104.6 | 102.5 | 99.1  | 100.2 | 105.8 | 102.5 |
| 21704066  | Rap1a                                                   | 184  | 21    | Leukocyte transendothelial migration; MAPK signaling pathway; Pancreatic secretion; Ras signaling pathway; Focal adhesion; Long-term potentiation; Chemokine signaling pathway; Platelet activation; Neurotrophin signaling pathway; Rap1 signaling pathway; cA | 96    | 78.5  | 97    | 82.8  | 96.3  | 105.4 | 103   | 116.3 |
| 77539770  | Ppp2r1b                                                 | 658  | 72.7  |                                                                                                                                                                                                                                                                 | 86.9  | 82.5  | 83.8  | 81.5  | 121.4 | 118.2 | 120.1 | 119.8 |
| 30424579  | 2610019F<br>03Rik;                                      | 182  | 20.2  |                                                                                                                                                                                                                                                                 | 126.8 | 140.6 | 126.9 | 127.5 | 67.1  | 63.3  | 75.6  | 69.1  |
| 117320524 | Pik3r1                                                  | 724  | 83.5  | Oxytocin signaling pathway; ErbB signaling pathway; FoxO signaling pathway; Leukocyte transendothelial migration; Acute myeloid leukemia; AGE-RAGE signaling pathway in diabetic complications; mTOR signaling pathway; Cholinergic synapse; Platinum drug resi | 110.8 | 108.9 | 104.8 | 111.3 | 87.9  | 92.3  | 90.6  | 89    |



|           |                |      |       |                                                                                                                                                                                                                                                                 |       |       |       |       |       |       |       |       |
|-----------|----------------|------|-------|-----------------------------------------------------------------------------------------------------------------------------------------------------------------------------------------------------------------------------------------------------------------|-------|-------|-------|-------|-------|-------|-------|-------|
| 45476581  | Scp2           | 547  | 59.1  | PPAR signaling pathway; Metabolic pathways; Primary bile acid biosynthesis; Peroxisome                                                                                                                                                                          | 109.7 | 106.8 | 104.6 | 104.4 | 88.5  | 92.3  | 101.5 | 100.8 |
| 123314464 | Fam65b; Ripor2 | 1078 | 118.9 |                                                                                                                                                                                                                                                                 | 123.2 | 123.1 | 127.2 | 126.4 | 73.7  | 75    | 76    | 72.6  |
| 133504509 | Osbp           | 805  | 88.7  |                                                                                                                                                                                                                                                                 | 101.1 | 98.4  | 101.2 | 102.5 | 92.9  | 93.6  | 97.5  | 99.4  |
| 165377206 | Ssr1           | 286  | 32    | Protein processing in endoplasmic reticulum                                                                                                                                                                                                                     | 85.3  | 88.4  | 71.2  | 81.9  | 126.3 | 117.6 | 123.5 | 117.7 |
| 117956399 | Lrba           | 2854 | 316.6 |                                                                                                                                                                                                                                                                 | 101.6 | 107.7 | 95.3  | 101.7 | 116.1 | 105.4 | 101.8 | 99.4  |
| 6680722   | Arf5           | 180  | 20.5  | Endocytosis                                                                                                                                                                                                                                                     | 111.5 | 111.9 | 101.7 | 101.1 | 87.4  | 88.1  | 93.2  | 92.6  |
| 75677435  | Aldh3a2        | 484  | 53.9  | Histidine metabolism; Pyruvate metabolism; Arginine and proline metabolism; Tryptophan metabolism; Valine, leucine and isoleucine degradation; Metabolic pathways; Lysine degradation; Fatty acid degradation; Glycolysis / Gluconeogenesis; beta-Alanine metab | 111   | 109   | 103.7 | 103.1 | 92.5  | 92    | 86    | 88.5  |
| 226442901 | Larp1          | 1072 | 121.1 |                                                                                                                                                                                                                                                                 | 87.8  | 83.5  | 82.9  | 77.7  | 120.5 | 120.7 | 127.3 | 129.4 |
| 31981100  | Rps14          | 151  | 16.3  | Ribosome                                                                                                                                                                                                                                                        | 86.1  | 85.3  | 89.5  | 88.8  | 107   | 109.7 | 118.4 | 116.3 |
| 227330633 | Pgm2           | 562  | 61.4  | Metabolic pathways; Amino sugar and nucleotide sugar metabolism; Purine metabolism; Starch and sucrose metabolism; Glycolysis / Gluconeogenesis; Pentose phosphate pathway; Galactose metabolism                                                                | 108.4 | 111   | 110.6 | 106.6 | 91.1  | 91.2  | 95.2  | 95.6  |
| 164450487 | Rbbp5          | 538  | 59.1  |                                                                                                                                                                                                                                                                 | 102   | 100.4 | 102.4 | 102.9 | 94.1  | 94.8  | 92.6  | 93.1  |
| 63003917  | Ddi2           | 399  | 44.6  |                                                                                                                                                                                                                                                                 | 100.1 | 102.9 | 95.5  | 97.7  | 99.7  | 99.2  | 100.2 | 101.5 |
| 6753762   | Ephx1          | 455  | 52.5  | Bile secretion; Chemical carcinogenesis; Metabolism of xenobiotics by cytochrome P450                                                                                                                                                                           | 90.6  | 90.2  | 88.5  | 87.6  | 98.7  | 95.2  | 93.6  | 105.3 |
| 147898671 | Srsf11         | 476  | 53.1  |                                                                                                                                                                                                                                                                 | 104.5 | 97.3  | 99.1  | 95.9  | 103.4 | 103.5 | 93.5  | 107.6 |
| 6679627   | Elf1           | 612  | 66.2  |                                                                                                                                                                                                                                                                 | 113.6 | 111.6 | 102.4 | 103.8 | 95    | 88.2  | 95.8  | 94.7  |
| 125628629 | Eif3d          | 548  | 63.9  | RNA transport                                                                                                                                                                                                                                                   | 91.5  | 91.8  | 97.1  | 90.1  | 110.2 | 111.5 | 101.9 | 106.9 |
| 21704176  | Thumpd1        | 350  | 38.9  |                                                                                                                                                                                                                                                                 | 116.4 | 118.9 | 110.2 | 113.2 | 99.4  | 83.7  | 96.2  | 91.2  |
| 160707921 | Anxa11         | 503  | 54    |                                                                                                                                                                                                                                                                 | 115.3 | 115.3 | 108.3 | 110.6 | 85.6  | 84.4  | 90    | 90.1  |
| 9789937   | Dnaja2         | 412  | 45.7  | Protein processing in endoplasmic reticulum                                                                                                                                                                                                                     | 88.4  | 87.5  | 89.3  | 89.4  | 109.8 | 108.5 | 107.4 | 110.9 |
| 166197700 | Parp14         | 1817 | 203.7 |                                                                                                                                                                                                                                                                 | 98.2  | 95.1  | 96.8  | 94.5  | 109.5 | 110.9 | 106.8 | 102.9 |
| 19527026  | Lrrc59         | 307  | 34.9  |                                                                                                                                                                                                                                                                 | 85.6  | 87.9  | 80.6  | 83.5  | 119.4 | 113.6 | 108.9 | 111   |
| 163310751 | Ubr5           | 2798 | 308.8 |                                                                                                                                                                                                                                                                 | 85.9  | 88    | 85.2  | 90    | 122.1 | 117.8 | 112.5 | 106.3 |
| 224809382 | Arpc5          | 151  | 16.3  | Endocytosis; Regulation of actin cytoskeleton; Salmonella infection; Fc gamma R-mediated phagocytosis; Bacterial invasion of epithelial cells                                                                                                                   | 97.7  | 95.4  | 119.1 | 119.9 | 93.3  | 94.8  | 90.8  | 94    |
| 19527258  | Aldh6a1        | 535  | 57.9  | Valine, leucine and isoleucine degradation; Metabolic pathways; beta-Alanine metabolism; Propanoate metabolism; Inositol phosphate metabolism; Carbon                                                                                                           | 115   | 118.8 | 116.3 | 114.6 | 89.6  | 96.4  | 91.8  | 92.5  |
| 6680770   | Bax            | 192  | 21.4  | AGE-RAGE signaling pathway in diabetic complications; Platinum drug resistance; p53 signaling pathway; Amyotrophic lateral sclerosis (ALS); Tuberculosis; Hepatitis B; HTLV-I infection; Longevity regulating pathway; Huntington's disease; Sphingolipid signa | 88.5  | 91    | 96.4  | 96.8  | 117.8 | 115.1 | 102.3 | 102.1 |

|           |                               |      |       |                                                                                                                                                                                                                                                                 |       |       |       |       |       |       |       |       |
|-----------|-------------------------------|------|-------|-----------------------------------------------------------------------------------------------------------------------------------------------------------------------------------------------------------------------------------------------------------------|-------|-------|-------|-------|-------|-------|-------|-------|
| 31560712  | Csk                           | 450  | 50.7  |                                                                                                                                                                                                                                                                 | 108.7 | 106.7 | 110.5 | 122.2 | 91.9  | 97.5  | 85.7  | 89.5  |
| 6679012   | Nap1l4                        | 375  | 42.7  |                                                                                                                                                                                                                                                                 | 101.3 | 95.6  | 95.7  | 92.2  | 94.2  | 98.3  | 95.8  | 97.9  |
| 19526878  | Pycr2                         | 320  | 33.6  | Arginine and proline metabolism; Metabolic pathways; Biosynthesis of amino acids                                                                                                                                                                                | 91.7  | 96.3  | 92.3  | 92.4  | 113.5 | 111.1 | 115.1 | 112.2 |
| 7305085   | Gfpt1                         | 681  | 76.7  | Metabolic pathways; Insulin resistance; Amino sugar and nucleotide sugar metabolism; Alanine, aspartate and glutamate metabolism                                                                                                                                | 86.3  | 87.1  | 90.9  | 83    | 102.9 | 103.3 | 111.4 | 111.3 |
| 37574078  | Tut1                          | 869  | 94.5  |                                                                                                                                                                                                                                                                 | 99.2  | 100.8 | 100.1 | 100.6 | 116.9 | 106.5 | 105.6 | 101.9 |
| 194440682 | Srrm1                         | 923  | 104.2 | mRNA surveillance pathway; RNA transport                                                                                                                                                                                                                        | 61.4  | 57    | 58.5  | 55.8  | 134.4 | 139   | 135.6 | 137.7 |
| 13385384  | Psmc12                        | 456  | 52.9  | Proteasome; Epstein-Barr virus infection                                                                                                                                                                                                                        | 91.8  | 91.6  | 83.7  | 85.7  | 109.4 | 111   | 106.9 | 108.1 |
| 21699068  | Pitrm1                        | 1036 | 117.3 |                                                                                                                                                                                                                                                                 | 92.2  | 91.7  | 90.2  | 91.4  | 112.9 | 113.3 | 103.4 | 102.4 |
| 21312216  | Gsdmd                         | 487  | 53.2  | NOD-like receptor signaling pathway                                                                                                                                                                                                                             | 116.8 | 115.8 | 113.5 | 117.3 | 93.9  | 85.9  | 79.9  | 84    |
| 113866024 | Rab5c                         | 216  | 23.4  | Endocytosis; Ras signaling pathway; Tuberculosis; Phagosome; Vasopressin-regulated water reabsorption; Amoebiasis                                                                                                                                               | 105.4 | 104.8 | 101.1 | 99.8  | 109.1 | 102.4 | 100.2 | 99.5  |
| 21312654  | Arpc5l                        | 153  | 17    | Endocytosis; Regulation of actin cytoskeleton; Salmonella infection; Fc gamma R-mediated phagocytosis; Bacterial invasion of epithelial cells                                                                                                                   | 113.4 | 106.9 | 111.8 | 104.3 | 92.3  | 92.2  | 95.9  | 102.6 |
| 58037481  | Scfd1                         | 639  | 72.3  |                                                                                                                                                                                                                                                                 | 97.5  | 96.6  | 93.6  | 94.3  | 101.4 | 102.3 | 102.2 | 109.9 |
| 116256518 | Hnrnpd                        | 336  | 36.2  |                                                                                                                                                                                                                                                                 | 116.7 |       | 114.8 |       | 82.8  |       | 95.2  |       |
| 6671571   | Arf2                          | 181  | 20.7  |                                                                                                                                                                                                                                                                 |       |       |       |       |       |       |       |       |
| 62243588  | Unc13d                        | 1083 | 122.8 |                                                                                                                                                                                                                                                                 | 102.9 | 102.7 | 101.3 | 98.5  | 98.8  | 94.8  | 93.2  | 92.9  |
| 407262920 | Hmgbl1; Gm21596; LOC100862258 | 215  | 24.9  | Base excision repair                                                                                                                                                                                                                                            | 115.8 | 103.4 | 139.1 | 146.2 | 76.1  | 77.7  | 60.6  | 63.6  |
| 6755000   | Pdcd6                         | 191  | 21.9  |                                                                                                                                                                                                                                                                 | 99.5  | 92.2  | 111.5 | 116.6 | 108.5 | 112.8 | 77.6  | 83.8  |
| 31982522  | Acads                         | 412  | 44.9  | Fatty acid metabolism; Valine, leucine and isoleucine degradation; Metabolic pathways; Fatty acid degradation; Butanoate metabolism; Carbon metabolism                                                                                                          | 114   | 106.1 | 109.6 | 113.4 | 90    | 92.3  | 85    | 81.5  |
| 6680952   | Cnn2                          | 305  | 33.1  |                                                                                                                                                                                                                                                                 | 117   | 116.6 | 128.1 | 128.6 | 72.8  | 73.3  | 73.4  | 74.2  |
| 100817933 | Acad9                         | 625  | 68.7  |                                                                                                                                                                                                                                                                 | 106   | 106.8 | 95    | 97.6  | 99.3  | 100.4 | 106.1 | 102.4 |
| 31560474  | Dgka                          | 730  | 82.7  | Phospholipase D signaling pathway; Metabolic pathways; Glycerophospholipid metabolism; Glycerolipid metabolism; Choline metabolism in cancer; Phosphatidylinositol signaling system                                                                             | 103.7 | 106.6 | 110.3 | 110.5 | 86.8  | 87.7  | 85.9  | 81.9  |
| 258547148 | Dnaja1                        | 397  | 44.8  | Protein processing in endoplasmic reticulum                                                                                                                                                                                                                     | 97.3  | 91.5  | 92.6  | 91.9  | 102   | 105.5 | 108.8 | 109.6 |
| 7710086   | Rab10                         | 200  | 22.5  | Endocytosis; AMPK signaling pathway                                                                                                                                                                                                                             | 87.6  | 93    | 90.9  | 89.8  | 112.4 | 110.8 | 108.6 | 101.4 |
| 111607496 | Jak1                          | 1153 | 133.3 | Herpes simplex infection; NOD-like receptor signaling pathway; Jak-STAT signaling pathway; Toxoplasmosis; Epstein-Barr virus infection; Signaling pathways regulating pluripotency of stem cells; Tuberculosis; Hepatitis B; HTLV-I infection; Osteoclast diffe | 102.6 | 106.6 | 107.1 | 108.5 | 92.9  | 89.8  | 95.9  | 91.3  |

|           |                   |      |       |                                                                                                                                                                                                                                                                 |       |       |       |       |       |       |       |       |
|-----------|-------------------|------|-------|-----------------------------------------------------------------------------------------------------------------------------------------------------------------------------------------------------------------------------------------------------------------|-------|-------|-------|-------|-------|-------|-------|-------|
| 67188876  | Cebpz             | 1052 | 120.3 |                                                                                                                                                                                                                                                                 | 94.6  | 90.5  | 88.3  | 88.4  | 117.6 | 119.3 | 120.4 | 116.6 |
| 87252727  | Skiv2l            | 1244 | 137.4 | RNA degradation                                                                                                                                                                                                                                                 | 97.9  | 107.3 | 93    | 103.2 | 104.3 | 98.9  | 106   | 97.6  |
| 115270968 | Gvin1             | 2427 | 280.6 |                                                                                                                                                                                                                                                                 | 112.8 | 119.6 | 73.4  | 78.2  | 105.2 | 106.1 | 108.2 | 105.7 |
| 21450259  | Exosc2            | 293  | 32.6  | RNA degradation                                                                                                                                                                                                                                                 | 100   | 106.8 | 105.1 | 105.8 | 103.9 | 103.9 | 91    | 87.7  |
| 311893385 | Dync1i2           | 655  | 73.3  |                                                                                                                                                                                                                                                                 | 112.9 | 115.4 | 108.4 | 107.8 | 85.3  | 85.1  | 80.6  | 90.3  |
| 29789347  | Smc4              | 1286 | 146.8 |                                                                                                                                                                                                                                                                 | 80.8  | 78.1  | 74.9  | 72.9  | 131.8 | 128.6 | 131.8 | 136.8 |
| 218931229 | Mbd2              | 414  | 43.5  |                                                                                                                                                                                                                                                                 | 108.8 | 103.7 | 101.7 | 98.4  | 92.6  | 94.1  | 101.2 | 104.9 |
| 255918186 | Ppp6r3            | 873  | 97.8  |                                                                                                                                                                                                                                                                 | 101.2 | 97.4  | 96.2  | 91.9  | 102   | 100.7 | 89.8  | 91.1  |
| 256985213 | Ddx52             | 598  | 67.4  |                                                                                                                                                                                                                                                                 | 95.2  | 93.6  | 94.1  | 95.7  | 108.5 | 104.6 | 105.3 | 109   |
| 50053703  | Ppp1r9b           | 817  | 89.5  |                                                                                                                                                                                                                                                                 | 110.9 | 110   | 109.1 | 106.6 | 93.1  | 91.4  | 95.6  | 99.6  |
| 21311907  | Sash3             | 380  | 41.6  |                                                                                                                                                                                                                                                                 | 108.2 | 107.1 | 108.8 | 108.9 | 96.9  | 97.2  | 86.3  | 83.2  |
| 124487087 | Sbno1             | 1391 | 153.8 |                                                                                                                                                                                                                                                                 | 97.7  | 98.2  | 91    | 95.6  | 113.7 | 109.6 | 103.1 | 106.5 |
| 161086922 | Camk4             | 469  | 52.5  | Oxytocin signaling pathway; Cholinergic synapse; Long-term potentiation; Amphetamine addiction; Osteoclast differentiation; Longevity regulating pathway; Neurotrophin signaling pathway; Calcium signaling pathway; Alcoholism; cAMP signaling pathway; Aldost | 102.1 | 99.3  | 104   | 100.3 | 91.1  | 90.9  | 84.4  | 84.5  |
| 114158701 | Nop14             | 860  | 98.7  |                                                                                                                                                                                                                                                                 | 95.3  | 100   | 92    | 97.3  | 111.9 | 106.7 | 116.3 | 107.4 |
| 124487309 | Phf3              | 2025 | 225.4 |                                                                                                                                                                                                                                                                 | 106.8 | 112.9 | 103.1 | 103.8 | 88.8  | 92.1  | 99.4  | 98.9  |
| 70995311  | Crebbp            | 2441 | 265.4 | FoxO signaling pathway; Herpes simplex infection; Wnt signaling pathway; MicroRNAs in cancer; Jak-STAT signaling pathway; Long-term potentiation; Epstein-Barr virus infection; Tuberculosis; Melanogenesis; Hepatitis B; HTLV-1 infection; Adherens junction;  | 107.1 | 104.6 | 96.8  | 98.1  | 96.6  | 96.1  | 100.6 | 102.8 |
| 31980772  | Ppp1cc;<br>Gm5601 | 323  | 37    | Oxytocin signaling pathway; mRNA surveillance pathway; Herpes simplex infection; Regulation of actin cytoskeleton; Dopaminergic synapse; Focal adhesion; Insulin signaling pathway; Long-term potentiation; Amphetamine addiction; Hippo signaling pathway; Pla | 108.9 | 96.7  | 97.8  | 93.6  | 99.6  | 109   | 107.1 | 109.7 |
| 124249073 | Wdr44             | 915  | 101.5 |                                                                                                                                                                                                                                                                 | 114.4 | 114.5 | 109   | 106.9 | 84    | 86.8  | 90.4  | 91.1  |
| 159032014 | Gigyf2            | 1291 | 149.1 |                                                                                                                                                                                                                                                                 | 98.2  | 90.8  | 89.6  | 85.4  | 111   | 115.6 | 111.5 | 113.3 |
| 51036613  | Fmr1              | 614  | 68.8  | RNA transport                                                                                                                                                                                                                                                   | 94.5  | 93.2  | 89.8  | 88    | 106   | 112.7 | 106   | 111.6 |
| 148747558 | Prdx2             | 198  | 21.8  |                                                                                                                                                                                                                                                                 | 101.8 | 103.6 | 108.7 | 110.9 | 90.5  | 89.2  | 96.2  | 94.5  |
| 68303650  | Mphosph1<br>0     | 681  | 78.7  | Ribosome biogenesis in eukaryotes                                                                                                                                                                                                                               | 88.3  | 85    | 87.5  | 83.8  | 115.2 | 116.2 | 124.7 | 126.8 |
| 14149647  | Rpl9              | 192  | 21.9  | Ribosome                                                                                                                                                                                                                                                        | 86.5  | 90.6  | 93.6  | 86.4  | 107.4 | 125   | 109.2 | 106.4 |
| 7242197   | Psmbl1            | 240  | 26.4  | Proteasome                                                                                                                                                                                                                                                      | 99.3  | 98.7  | 102   | 101.2 | 105.5 | 104.4 | 102.7 | 103   |
| 10946854  | Prps1             | 318  | 34.8  | Metabolic pathways; Biosynthesis of amino acids; Purine metabolism; Pentose phosphate pathway; Carbon                                                                                                                                                           | 101   | 98.1  | 96.9  | 104.8 | 101.3 | 101.4 | 99.3  | 99.9  |
| 88014564  | Mad11l            | 717  | 83.5  | Progesterone-mediated oocyte maturation; Cell cycle; Viral carcinogenesis                                                                                                                                                                                       | 100.5 | 98.9  | 90.6  | 91    | 102.7 | 101.3 | 108.2 | 114.6 |
| 27229277  | Tars              | 722  | 83.3  | Aminoacyl-tRNA biosynthesis                                                                                                                                                                                                                                     | 81.5  | 84.1  | 81.5  | 80.3  | 120.5 | 120.4 | 117.4 | 118.5 |

|           |              |      |       |                                                                                                                                                                                                                                                                 |       |       |       |       |       |       |       |       |
|-----------|--------------|------|-------|-----------------------------------------------------------------------------------------------------------------------------------------------------------------------------------------------------------------------------------------------------------------|-------|-------|-------|-------|-------|-------|-------|-------|
| 7304931   | Bop1         | 732  | 82.5  |                                                                                                                                                                                                                                                                 | 93.9  | 98.1  | 91.2  | 94.7  | 113.3 | 109.7 | 117.2 | 101.4 |
| 158711665 | Cul4b        | 970  | 110.6 | Ubiquitin mediated proteolysis; Nucleotide excision repair                                                                                                                                                                                                      | 95.9  | 92.6  | 92.9  | 93.1  | 105.1 | 111.2 | 103.2 | 106.9 |
| 6678952   | Mthfd2       | 350  | 37.8  | Metabolic pathways; One carbon pool by folate                                                                                                                                                                                                                   | 56.9  | 52.5  | 55.6  | 50.9  | 165.9 | 169   | 153.7 | 168.2 |
| 70778974  | Tapbp        | 466  | 49.8  |                                                                                                                                                                                                                                                                 | 111.3 | 108.6 | 88.2  | 91.8  | 93    | 91.9  | 97.6  | 97.3  |
| 16716499  | Sfxn3        | 321  | 35.4  |                                                                                                                                                                                                                                                                 | 108.1 | 112.3 | 104.3 | 100.6 | 99.6  | 98.3  | 75.8  | 77    |
| 116325981 | Ifi203       | 457  | 51.7  |                                                                                                                                                                                                                                                                 | 112   | 111.3 | 111.6 | 109.2 | 80.2  | 80.1  | 84.3  | 91    |
| 6754724   | Psm7         | 321  | 36.5  | Proteasome; Epstein-Barr virus infection                                                                                                                                                                                                                        | 84.4  | 86.2  | 88.6  | 89.3  | 108.1 | 108.5 | 111   | 93.6  |
| 57634518  | Sept11       | 429  | 49.3  |                                                                                                                                                                                                                                                                 | 91.9  | 91.6  | 93.4  | 90.4  | 99.6  | 98.7  | 102   | 104.4 |
| 160707894 | Akr1b3       | 316  | 35.7  | Metabolic pathways; Glycerolipid metabolism; Fructose and mannose metabolism; Pentose and glucuronate interconversions; Galactose metabolism                                                                                                                    | 118.1 | 117.4 | 121.5 | 120.9 | 73.8  | 74.8  | 81.4  | 80.5  |
| 12746430  | Utp3         | 469  | 53.4  |                                                                                                                                                                                                                                                                 | 91    | 89.7  | 85.5  | 87.3  | 111.4 | 112.9 | 123.5 | 124.5 |
| 267844920 | Wbp11        | 641  | 69.8  | Spliceosome                                                                                                                                                                                                                                                     | 113.6 | 111.7 | 102.6 | 103.9 | 94.9  | 89.6  | 89    | 84.1  |
| 408821450 | Myh14        | 2033 | 231.5 |                                                                                                                                                                                                                                                                 | 51.8  | 83.6  | 65.5  | 107.2 | 189.4 | 122.3 | 127.4 | 99.3  |
| 270132620 | Arhgef6      | 795  | 89.8  | Regulation of actin cytoskeleton; Pancreatic cancer                                                                                                                                                                                                             | 100.5 | 103.2 | 104.5 | 101.1 | 93.7  | 99.6  | 95.3  | 95.8  |
| 7305485   | Sh3gl1       | 368  | 41.5  | Endocytosis                                                                                                                                                                                                                                                     | 100.3 | 98.7  | 100.2 | 100.7 | 93.5  | 94.3  | 101.6 | 100.3 |
| 270483773 | Ctps2; S100g | 586  | 65.5  | Metabolic pathways; Pyrimidine metabolism                                                                                                                                                                                                                       | 116.6 | 121.2 | 101.9 | 94.9  | 88.5  | 91.3  | 90    | 92.6  |
| 110626104 | Ifit1        | 463  | 53.7  | Herpes simplex infection; Hepatitis C                                                                                                                                                                                                                           | 102.7 | 102   | 95    | 95.7  | 88.8  | 84.4  | 87.4  | 82.6  |
| 141802630 | Brix1        | 353  | 41.2  |                                                                                                                                                                                                                                                                 | 82.5  | 87    | 87.2  | 90.8  | 106.3 | 111.1 | 108   | 106.3 |
| 83699424  | Rpl18        | 188  | 21.6  | Ribosome                                                                                                                                                                                                                                                        | 86.9  | 88    | 91.7  | 91.6  | 107.9 | 108.2 | 113.3 | 109.5 |
| 161484668 | Ppp1cb       | 327  | 37.2  | Oxytocin signaling pathway; mRNA surveillance pathway; Herpes simplex infection; Regulation of actin cytoskeleton; Dopaminergic synapse; Focal adhesion; Insulin signaling pathway; Long-term potentiation; Amphetamine addiction; Hippo signaling pathway; Pla | 102.2 | 99.1  | 98.4  | 96.3  | 95.9  | 97.3  | 99.2  | 100.2 |
| 20806532  | Csda; Ybx3   | 292  | 30.7  |                                                                                                                                                                                                                                                                 | 62.7  | 67.3  | 57.9  | 65.8  | 138.3 | 139.1 | 167.5 | 162.7 |
| 16716467  | Nans         | 359  | 40    | Metabolic pathways; Amino sugar and nucleotide sugar metabolism                                                                                                                                                                                                 | 110.8 | 108.3 | 112.2 | 111.3 | 86.8  | 86    | 92.1  | 93.8  |
| 164698506 | Vps4b        | 444  | 49.4  | Endocytosis                                                                                                                                                                                                                                                     | 92.2  | 94.1  | 93.5  | 94.3  | 102.9 | 101.1 | 110.6 | 105.2 |
| 11096332  | Myg1         | 380  | 42.7  |                                                                                                                                                                                                                                                                 | 105.3 | 105.3 | 97.1  | 97.3  | 105   | 102.8 | 93.7  | 96.3  |
| 31044459  | Ctcf         | 736  | 83.7  |                                                                                                                                                                                                                                                                 | 104.6 | 109.8 | 109.7 | 108.6 | 93.4  | 85.6  | 91.6  | 94.2  |
| 83716013  | Spn          | 395  | 40    | Epstein-Barr virus infection; Cell adhesion molecules (CAMs)                                                                                                                                                                                                    | 92.4  | 86.6  | 98.7  | 100.1 | 101.5 | 103   | 109.1 | 107.4 |
| 7549752   | Cul1         | 776  | 89.6  | Herpes simplex infection; Wnt signaling pathway; Ubiquitin mediated proteolysis; Circadian rhythm; Oocyte meiosis; Cell cycle; TGF-beta signaling pathway; Hedgehog signaling pathway; Protein processing in endoplasmic                                        | 95.1  | 93.2  | 93    | 91.6  | 108.2 | 108.9 | 100.5 | 104.9 |
| 161353449 | Rbm25        | 838  | 99.5  | Spliceosome                                                                                                                                                                                                                                                     | 100.6 | 101.6 | 100.8 | 102.1 | 100.3 | 101.5 | 87    | 86.8  |
| 30425338  | Wdr3         | 942  | 105.7 | Ribosome biogenesis in eukaryotes                                                                                                                                                                                                                               | 83.9  | 82.9  | 87.3  | 86.5  | 119.8 | 114.4 | 106   | 116.3 |

|           |          |      |       |                                                                                                                                                                                                                                                                    |       |       |       |       |       |       |       |       |
|-----------|----------|------|-------|--------------------------------------------------------------------------------------------------------------------------------------------------------------------------------------------------------------------------------------------------------------------|-------|-------|-------|-------|-------|-------|-------|-------|
| 84794597  | Ppp3r1   | 170  | 19.3  | Oxytocin signaling pathway; Wnt signaling pathway; T cell receptor signaling pathway; MAPK signaling pathway; Amyotrophic lateral sclerosis (ALS); VEGF signaling pathway; Long-term potentiation; Amphetamine addiction; Tuberculosis; Axon guidance; HTLV-1      | 125.9 | 121.1 | 108.2 | 108.3 | 84.8  | 85.5  | 96.2  | 95.7  |
| 120587007 | Bcl11b   | 884  | 94.5  |                                                                                                                                                                                                                                                                    | 104.7 | 101.5 | 104   | 106.8 | 100.3 | 94.5  | 95    | 97    |
| 6755698   | Surf4    | 269  | 30.4  |                                                                                                                                                                                                                                                                    | 93.7  | 97    | 91.1  | 91.6  | 108.3 | 104.7 | 101.4 | 98.6  |
| 116517297 | Git2     | 708  | 78.7  | Endocytosis                                                                                                                                                                                                                                                        | 104.7 | 100.9 | 107.9 | 110.4 | 85.9  | 88.6  | 91.4  | 91.9  |
| 19527344  | Stk38    | 465  | 54.1  |                                                                                                                                                                                                                                                                    | 103.3 | 108.2 | 111.5 | 115.5 | 92.5  | 92.2  | 82.8  | 82.4  |
| 160333789 | Spr      | 262  | 27.9  | Metabolic pathways; Folate biosynthesis                                                                                                                                                                                                                            | 117.6 | 116.9 | 108.1 | 107.8 | 87.4  | 88.3  | 92    | 92.1  |
| 30527367  | Scaf8    | 1268 | 139.5 |                                                                                                                                                                                                                                                                    | 110.9 | 108   | 99.8  | 102.7 | 93    | 90.6  | 96.4  | 98.6  |
| 115298670 | Snrnp40  | 358  | 39.3  | Spliceosome                                                                                                                                                                                                                                                        | 96    | 96    | 97.3  | 96.1  | 100.4 | 100.6 | 99.7  | 102.6 |
| 31543976  | Ywhag    | 247  | 28.3  | Epstein-Barr virus infection; Hippo signaling pathway; Oocyte meiosis; Cell cycle; PI3K-Akt signaling pathway; Viral carcinogenesis                                                                                                                                | 102.1 | 106.2 | 94.7  | 100.8 | 98.9  | 94.2  | 106.8 | 101.8 |
| 31982091  | Tomm22   | 142  | 15.5  |                                                                                                                                                                                                                                                                    | 96.4  | 96.1  | 85    | 85.5  | 113.7 | 111.4 | 111.1 | 114.6 |
| 89111935  | Pus7     | 660  | 74.7  |                                                                                                                                                                                                                                                                    | 96.3  | 97.7  | 85.1  | 82.5  | 108.6 | 115.9 | 114.4 | 113.6 |
| 23510313  | Wasf2    | 497  | 54    | Regulation of actin cytoskeleton; Adherens junction; Salmonella infection; Fc gamma R-mediated phagocytosis; Choline metabolism in cancer; Bacterial invasion of epithelial cells                                                                                  | 105.7 | 102.1 | 105.4 | 107.7 | 90.7  | 96.9  | 97.6  | 94.6  |
| 158749543 | Ankhd1   | 2548 | 269.5 |                                                                                                                                                                                                                                                                    | 107.6 | 117.8 | 96.2  | 92.2  | 111.5 | 112.2 | 103.1 | 103.7 |
| 6679345   | Prkcb    | 673  | 76.8  |                                                                                                                                                                                                                                                                    | 114.7 | 115   | 114.7 | 115.4 | 80.8  | 86.4  | 87.5  | 87.9  |
| 225690616 | Acot7    | 384  | 42.8  |                                                                                                                                                                                                                                                                    | 82.6  | 80.4  | 80.3  | 76.2  | 122.7 | 130.1 | 111.2 | 108.4 |
| 12963511  | Rps19    | 145  | 16.1  | Ribosome                                                                                                                                                                                                                                                           | 101.4 | 98.3  | 95.9  | 97.4  | 90.5  | 97.1  | 127.5 | 122.7 |
| 114155125 | Rbm12    | 992  | 102.7 |                                                                                                                                                                                                                                                                    | 99.5  | 100.9 | 102.6 | 101.6 | 97.7  | 98.4  | 97.6  | 97.2  |
| 321267528 | Htatsf1  | 757  | 86.2  |                                                                                                                                                                                                                                                                    | 96.1  | 99.5  | 97.9  | 97.2  | 96.2  | 98.3  | 97.2  | 102.8 |
| 443497949 | Eno3     | 434  | 47    | RNA degradation; Metabolic pathways; Biosynthesis of amino acids; Glycolysis / Gluconeogenesis; HIF-1 signaling pathway; Carbon metabolism                                                                                                                         | 109.2 | 101.4 | 117.9 | 121.2 | 99.9  | 99.9  | 95.7  | 100.4 |
| 77020262  | Ak2      | 239  | 26.5  | Thiamine metabolism; Metabolic pathways; Purine metabolism                                                                                                                                                                                                         | 113.7 | 113.7 | 105.9 | 109.1 | 91.8  | 90.3  | 104.3 | 98.9  |
| 6755568   | Slfn1    | 337  | 38    |                                                                                                                                                                                                                                                                    | 96.5  | 98.3  | 107.7 | 105.4 | 88    | 82    | 83.4  | 69.9  |
| 31542372  | Cdkn1b   | 197  | 22.2  | ErbB signaling pathway; FoxO signaling pathway; AGE-RAGE signaling pathway in diabetic complications; MicroRNAs in cancer; Epstein-Barr virus infection; Small cell lung cancer; Hepatitis B; Transcriptional misregulation in cancer; Cell cycle; HIF-1 signaling | 113.7 | 117.4 | 110.7 | 113.3 | 83.3  | 78.5  | 98.5  | 80.4  |
| 46195798  | Ddost    | 441  | 49    | Metabolic pathways; N-Glycan biosynthesis; Protein processing in endoplasmic reticulum                                                                                                                                                                             | 83.9  | 84.9  | 84    | 80.1  | 119.9 | 122.1 | 93.4  | 115.2 |
| 146260280 | Hnrnpab  | 332  | 36.2  |                                                                                                                                                                                                                                                                    | 93.4  | 92.7  | 95.8  | 94.8  | 98    | 98.5  | 116.6 | 106.5 |
| 227498519 | Traf3ip3 | 513  | 58.6  |                                                                                                                                                                                                                                                                    | 106.4 | 106.9 | 101.3 | 101.4 | 92.3  | 90.9  | 100.7 | 96.7  |
| 213417962 | Zbp1     | 411  | 44.2  |                                                                                                                                                                                                                                                                    | 114.1 | 117.6 | 96    | 96.9  | 84    | 84.6  | 87.4  | 77    |

|           |                     |      |       |                                                                                                                                                                                                                                                                                                |       |       |       |       |       |       |       |       |
|-----------|---------------------|------|-------|------------------------------------------------------------------------------------------------------------------------------------------------------------------------------------------------------------------------------------------------------------------------------------------------|-------|-------|-------|-------|-------|-------|-------|-------|
| 6753074   | Ap2m1               | 435  | 49.6  | Endocytosis; Endocrine and other factor-regulated calcium reabsorption; Huntington's disease; Synaptic vesicle cycle                                                                                                                                                                           | 94.4  | 93.9  | 94.9  | 95.1  | 108.8 | 99.4  | 96.1  | 101.6 |
| 58037163  | Nup35               | 325  | 34.8  | RNA transport                                                                                                                                                                                                                                                                                  | 92    | 97.5  | 103.4 | 94.6  | 109.7 | 105.6 | 105.6 | 103.9 |
| 149250091 | Rps12-ps10          | 132  | 14.5  |                                                                                                                                                                                                                                                                                                | 86.9  | 90    | 104.6 | 97.2  | 115.5 | 112.5 | 114.5 | 118.5 |
| 158636000 | Apbb1ip             | 670  | 74.3  | Platelet activation; Rap1 signaling pathway                                                                                                                                                                                                                                                    | 139.8 | 115.6 | 104.8 | 108.6 | 90.2  | 85.2  | 91.3  | 93.4  |
| 21703948  | Rfc4                | 364  | 39.8  | DNA replication; Nucleotide excision repair; Mismatch repair                                                                                                                                                                                                                                   | 82.3  | 83    | 80.4  | 78.1  | 126.7 | 128.7 | 123.7 | 123   |
| 82880662  | Hspa14              | 509  | 54.6  |                                                                                                                                                                                                                                                                                                | 87    | 91.6  | 83.7  | 94.4  | 111.1 | 110.6 | 115.8 | 114.9 |
| 254588014 | Etfdh               | 616  | 68    |                                                                                                                                                                                                                                                                                                | 105.7 | 108.6 | 103.4 | 104.7 | 99.8  | 99.9  | 100.2 | 100.1 |
| 255308865 | Vav1                | 845  | 98.1  | Leukocyte transendothelial migration; T cell receptor signaling pathway; Regulation of actin cytoskeleton; Focal adhesion; Chemokine signaling pathway; B cell receptor signaling pathway; Fc gamma R-mediated phagocytosis; cAMP signaling pathway; Natural killer cell-mediated cytotoxicity | 105.2 | 102.6 | 108.4 | 109.7 | 92.7  | 95.2  | 92.1  | 91.9  |
| 6680832   | Calm3; Calm1; Calm2 | 149  | 16.8  | Oxytocin signaling pathway; Dopaminergic synapse; Ras signaling pathway; Insulin signaling pathway; Long-term potentiation; Amphetamine addiction; Tuberculosis; Melanogenesis; Oocyte meiosis; Pertussis; Neurotrophin signaling pathway; cGMP-PKG signaling pathway                          | 123.7 | 117.4 | 108.6 | 113.2 | 79.7  | 80.4  | 95.7  | 93.8  |
| 158854005 | Prpf4b              | 1007 | 116.9 |                                                                                                                                                                                                                                                                                                | 97.9  | 97.9  | 96.7  | 92.7  | 98    | 101   | 99.8  | 106.5 |
| 167234372 | Eif4b               | 611  | 68.8  | mTOR signaling pathway; Proteoglycans in cancer; PI3K-Akt signaling pathway; RNA transport                                                                                                                                                                                                     | 99.8  | 96.7  | 96.1  | 98.4  | 104.6 | 105.8 | 115.5 | 120.8 |
| 454528546 | Zc3h11a             | 792  | 86.4  |                                                                                                                                                                                                                                                                                                | 102.5 | 101   | 102.4 | 99.9  | 96    | 95.8  | 105   | 105.2 |
| 13386338  | Rap2b               | 183  | 20.5  |                                                                                                                                                                                                                                                                                                | 101.5 | 102.2 | 96.5  | 95.7  | 97.3  | 107.8 | 99.7  | 92.2  |
| 6755965   | Vdac2               | 295  | 31.7  | NOD-like receptor signaling pathway; HTLV-I infection; Huntington's disease; Parkinson's disease; cGMP-PKG signaling pathway; Calcium signaling pathway                                                                                                                                        | 95.8  | 99.5  | 107.5 | 103.6 | 101.5 | 97.5  | 95.8  | 96.5  |
| 6755214   | Psme3               | 254  | 29.5  | Proteasome; Hepatitis C; Antigen processing and presentation                                                                                                                                                                                                                                   | 75.2  | 69.4  | 72.4  | 67    | 125.8 | 134.4 | 138.9 | 145.6 |
| 45597447  | Sod1                | 154  | 15.9  | Amyotrophic lateral sclerosis (ALS); Huntington's disease; Prion diseases; Longevity regulating pathway - multiple species; Peroxisome                                                                                                                                                         | 113.4 | 113   | 120.3 | 120.6 | 85.2  | 88.5  | 83.3  | 84.5  |
| 19527156  | Naa38; Lsm8         | 96   | 10.4  | RNA degradation; Spliceosome                                                                                                                                                                                                                                                                   | 121   | 116.2 | 107.6 | 108.1 | 88.4  | 88.4  | 91.7  | 96.5  |
| 37674214  | Gmip                | 971  | 107.5 |                                                                                                                                                                                                                                                                                                | 111.2 | 107.4 | 105.7 | 108.3 | 97.1  | 97    | 88.2  | 83.1  |
| 71043944  | Snx1                | 521  | 58.8  | Endocytosis                                                                                                                                                                                                                                                                                    | 103.7 | 94.2  | 96.8  | 92.4  | 98.2  | 104.1 | 102.8 | 109.2 |
| 13386054  | Arpc4               | 168  | 19.7  | Endocytosis; Regulation of actin cytoskeleton; Salmonella infection; Fc gamma R-mediated phagocytosis; Bacterial invasion of epithelial cells                                                                                                                                                  | 105   | 108.9 | 105.8 | 104.7 | 90.4  | 91    | 91.3  | 86.6  |
| 124001582 | Mia3                | 1930 | 213.5 |                                                                                                                                                                                                                                                                                                | 110.5 | 96.1  | 90.4  | 91.7  | 110.6 | 109.9 | 108.2 | 108.6 |
| 71774133  | Ppib                | 216  | 23.7  |                                                                                                                                                                                                                                                                                                | 92.1  | 91.1  | 90.1  | 94    | 110.7 | 109.9 | 104.8 | 101.3 |
| 347543755 | B4galnt1            | 569  | 63.4  |                                                                                                                                                                                                                                                                                                | 96.7  | 102.2 | 93.8  | 97.2  | 114.9 | 108.5 | 88.8  | 92.2  |
| 124248572 | Vbp1                | 196  | 22.4  |                                                                                                                                                                                                                                                                                                | 90.8  | 95    | 94.2  | 93.1  | 113.1 | 112   | 112.7 | 107.5 |
| 12025542  | Asna1               | 348  | 38.8  |                                                                                                                                                                                                                                                                                                | 101   | 102.4 | 93    | 90.5  | 103.3 | 101.6 | 102.4 | 104.6 |

|           |                                                 |      |       |                                                                                                                                                                                                                                                                 |       |       |       |       |       |       |       |       |
|-----------|-------------------------------------------------|------|-------|-----------------------------------------------------------------------------------------------------------------------------------------------------------------------------------------------------------------------------------------------------------------|-------|-------|-------|-------|-------|-------|-------|-------|
| 28076989  | Ddx54                                           | 874  | 97.7  |                                                                                                                                                                                                                                                                 | 86.2  | 90    | 106.2 | 113.1 | 138.5 | 143.4 | 108   | 102.4 |
| 157838001 | Ddx42                                           | 929  | 101.9 | Spliceosome                                                                                                                                                                                                                                                     | 93.6  | 100.9 | 95.9  | 96.9  | 104.4 | 103.2 | 106.6 | 104.5 |
| 31980904  | Cpsf3                                           | 684  | 77.5  | mRNA surveillance pathway                                                                                                                                                                                                                                       | 98.3  | 96.3  | 97.1  | 98.4  | 100.6 | 101.1 | 97.4  | 99    |
| 7305109   | Emg1                                            | 244  | 27    | Ribosome biogenesis in eukaryotes                                                                                                                                                                                                                               | 88.6  | 90.6  | 90.4  | 90.3  | 112.6 | 109.6 | 110.5 | 113.9 |
| 6677805   | Rps4x                                           | 263  | 29.6  | Ribosome                                                                                                                                                                                                                                                        | 82.6  | 79.9  | 88.7  | 92.3  | 113.2 | 120.3 | 92.2  | 91.6  |
| 31981086  | Efhd2                                           | 240  | 26.8  |                                                                                                                                                                                                                                                                 | 117.4 | 121.5 | 124.4 | 123.7 | 88.1  | 85.5  | 99    | 98.6  |
| 395627630 | Bin2                                            | 505  | 54.7  |                                                                                                                                                                                                                                                                 | 115.7 | 105.8 | 111.3 | 111   | 88.6  | 88.7  | 88.2  | 91.7  |
| 51317387  | Gak                                             | 1305 | 143.6 |                                                                                                                                                                                                                                                                 | 105.9 | 101.7 | 105   | 104.7 | 90.4  | 92.8  | 93.8  | 96    |
| 23956138  | Sbds                                            | 250  | 28.8  | Ribosome biogenesis in eukaryotes                                                                                                                                                                                                                               | 113.5 | 108.2 | 111.9 | 112.9 | 89.7  | 91.5  | 94.7  | 92    |
| 6678674   | Ldhb                                            | 334  | 36.5  | Pyruvate metabolism; Metabolic pathways; Cysteine and methionine metabolism; Glycolysis / Gluconeogenesis; Propanoate metabolism; Glucagon signaling pathway                                                                                                    | 91    | 91.1  | 97.8  | 99.3  | 84.9  | 81.8  | 84    | 85.2  |
| 116517295 | Git2                                            | 679  | 75.6  | Endocytosis                                                                                                                                                                                                                                                     | 103.8 | 103.2 | 100.3 | 101.1 | 94.1  | 99.6  | 85.7  | 84.6  |
| 7305395   | Pnp                                             | 289  | 32.2  | Metabolic pathways; Nicotinate and nicotinamide metabolism; Purine metabolism; Pyrimidine metabolism                                                                                                                                                            | 103.3 | 109.5 | 103.5 | 88.9  | 103.6 | 100.9 | 92.6  | 98.2  |
| 13385914  | Rgs10                                           | 181  | 21.1  |                                                                                                                                                                                                                                                                 | 135.9 | 134.9 | 123.7 | 122.3 | 61.8  | 59.2  | 61    | 68.4  |
| 410025486 | Fen1                                            | 380  | 42.6  | DNA replication; Non-homologous end-joining; Base excision repair                                                                                                                                                                                               | 94.3  | 97.8  | 97.3  | 96.6  | 102.1 | 103.8 | 109.3 | 100.4 |
| 13385434  | Paics                                           | 425  | 47    | Metabolic pathways; Purine metabolism                                                                                                                                                                                                                           | 78.4  | 77.8  | 78.3  | 75.9  | 128   | 130.6 | 127   | 127.9 |
| 27501448  | Eif6                                            | 245  | 26.5  | Ribosome biogenesis in eukaryotes                                                                                                                                                                                                                               | 98.9  | 97.4  | 97.3  | 98.1  | 108   | 108.4 | 105   | 103.8 |
| 45592930  | Ppp3cb                                          | 525  | 59.1  | Oxytocin signaling pathway; Wnt signaling pathway; T cell receptor signaling pathway; MAPK signaling pathway; Dopaminergic synapse; Amyotrophic lateral sclerosis (ALS); VEGF signaling pathway; Long-term potentiation; Amphetamine addiction; Tuberculosis: A | 106.7 | 111.1 | 104.7 | 104.3 | 96.2  | 94.1  | 92.1  | 93.5  |
| 55741463  | Pfdn5                                           | 154  | 17.3  |                                                                                                                                                                                                                                                                 | 97.5  | 104.1 | 92.1  | 94.1  | 105.8 | 102.4 | 123.7 | 119.3 |
| 19526800  | Erc3                                            | 783  | 89.1  | Basal transcription factors; Nucleotide excision repair                                                                                                                                                                                                         | 108.6 | 99.4  | 97.2  | 95.7  | 110.3 | 111   | 98.2  | 100.1 |
| 355390287 | Rbmx11                                          | 388  | 42.1  | Spliceosome                                                                                                                                                                                                                                                     | 112.4 | 114.6 | 108.3 | 106.3 | 83    | 85.3  | 101.6 | 99.3  |
| 377837128 | Rpl23;<br>LOC1000<br>44627;<br>LOC1008<br>62455 | 140  | 14.9  | Ribosome                                                                                                                                                                                                                                                        | 93.2  | 94.8  | 91.8  | 95.2  | 107.2 | 114.7 | 105.9 | 98.8  |
| 27369539  | Rap2c                                           | 183  | 20.7  |                                                                                                                                                                                                                                                                 | 94.6  | 96.5  | 107.1 | 99.2  | 100.6 | 103.1 | 100.2 | 103.2 |
| 38372905  | Rab8a                                           | 207  | 23.7  | Endocytosis; Pancreatic secretion; AMPK signaling pathway                                                                                                                                                                                                       | 111.9 | 96    | 87.6  | 92.1  | 96.1  | 100.3 | 95.1  | 108.8 |
| 283135194 | Atp13a1                                         | 1200 | 132.3 |                                                                                                                                                                                                                                                                 | 101.7 | 97.2  | 94.9  | 97.1  | 101.4 | 106.6 | 95.3  | 94.2  |
| 124430537 | Sri                                             | 198  | 21.6  |                                                                                                                                                                                                                                                                 | 111.7 | 114.1 | 116.1 | 115.4 | 92.4  | 88.3  | 81.7  | 79.2  |
| 268838020 | Mri1                                            | 369  | 39.4  | Metabolic pathways; Cysteine and methionine metabolism                                                                                                                                                                                                          | 119.8 | 119.1 | 113.1 | 111.7 | 83.4  | 84    | 88.7  | 90.5  |

|           |               |      |       |                                                                                                                                                                                                                                                                            |       |       |       |       |       |       |       |       |
|-----------|---------------|------|-------|----------------------------------------------------------------------------------------------------------------------------------------------------------------------------------------------------------------------------------------------------------------------------|-------|-------|-------|-------|-------|-------|-------|-------|
| 84579909  | Mapk1         | 358  | 41.2  | Oxytocin signaling pathway; ErbB signaling pathway; FoxO signaling pathway; Acute myeloid leukemia; AGE-RAGE signaling pathway in diabetic complications; mTOR signaling pathway; Cholinergic synapse; Platinum drug resistance; Chagas disease (American trypanosomiasis) | 99.9  | 104.3 | 107.3 | 106.1 | 91.9  | 90.9  | 89.3  | 87.3  |
| 23346579  | Wipfl         | 493  | 50.1  | Endocytosis                                                                                                                                                                                                                                                                | 109.9 | 109.4 | 115.4 | 108.2 | 89.5  | 94    | 97    | 98.5  |
| 226443015 | Faah          | 579  | 63.2  | Retrograde endocannabinoid signaling                                                                                                                                                                                                                                       | 104.2 | 101.3 | 89.3  | 90.2  | 109.9 | 100.1 | 96.8  | 99.7  |
| 31981983  | Stim1         | 685  | 77.5  | Platelet activation; Calcium signaling pathway                                                                                                                                                                                                                             | 108.7 | 105.8 | 107.6 | 106   | 92.3  | 91.6  | 88.3  | 89.2  |
| 153945886 | Ddx58         | 926  | 105.9 | Herpes simplex infection; Epstein-Barr virus infection; RIG-I-like receptor signaling pathway; Hepatitis B; Influenza A; Hepatitis C; Cytosolic DNA-sensing pathway; NF-kappa B signaling pathway; Measles                                                                 | 110.2 | 107.9 | 112.1 | 111.7 | 81.4  | 82.7  | 79.6  | 83.2  |
| 255003777 | Glod4         | 298  | 33.3  |                                                                                                                                                                                                                                                                            | 114.5 | 114.3 | 118.2 | 118.4 | 89.2  | 85.5  | 77.8  | 83.7  |
| 7305635   | Yme1l1        | 715  | 80    |                                                                                                                                                                                                                                                                            | 96.2  | 88.5  | 82.3  | 84.2  | 117   | 113.9 | 122.6 | 121.1 |
| 162287370 | Lmna          | 665  | 74.2  | Hypertrophic cardiomyopathy (HCM); Arrhythmogenic right ventricular cardiomyopathy (ARVC); Dilated cardiomyopathy; Apoptosis                                                                                                                                               | 94.2  | 88.9  | 89.4  | 87.3  | 88    | 80.1  | 72.1  | 75.6  |
| 7110705   | Ptma          | 111  | 12.2  | Epstein-Barr virus infection                                                                                                                                                                                                                                               | 100.4 | 103.8 | 98.7  | 107   | 81.4  | 88.1  | 125.7 | 117.8 |
| 39930555  | Bms1          | 1284 | 145.3 | Ribosome biogenesis in eukaryotes                                                                                                                                                                                                                                          | 92.4  | 88.6  | 91    | 89    | 111.4 | 120.1 | 113.2 | 105.3 |
| 58037205  | Bag5          | 447  | 50.9  |                                                                                                                                                                                                                                                                            | 99.4  | 99.5  | 98.2  | 99    | 92.5  | 93.9  | 103.9 | 102   |
| 163838641 | Atp5c1        | 298  | 32.9  | Metabolic pathways; Huntington's disease; Oxidative phosphorylation; Parkinson's disease; Alzheimer's disease                                                                                                                                                              | 97.4  | 100   | 97.3  | 95.8  | 105.5 | 106.5 | 95.8  | 94.4  |
| 27777677  | Dera          | 318  | 35    | Pentose phosphate pathway                                                                                                                                                                                                                                                  | 111.5 | 108.4 | 97    | 99.5  | 96.9  | 100.3 | 97.9  | 98.9  |
| 24762230  | Rps15a        | 130  | 14.8  | Ribosome                                                                                                                                                                                                                                                                   | 85.8  | 85.8  | 85.1  | 84.9  | 109   | 108   | 117.1 | 114.4 |
| 67846103  | Shmt1         | 478  | 52.6  | Metabolic pathways; Biosynthesis of amino acids; Glycine, serine and threonine metabolism; Antifolate resistance; Carbon metabolism; One carbon pool by folate; Glyoxylate and dicarboxylate metabolism                                                                    | 68.8  | 75.5  | 63.6  | 75.1  | 130.7 | 144   | 135.5 | 126.4 |
| 6679767   | Fdxr          | 494  | 54.2  |                                                                                                                                                                                                                                                                            | 105.8 | 108.4 | 102.6 | 102   | 96.8  | 96.2  | 97.6  | 96.7  |
| 29293805  | Cyth4         | 393  | 45.3  | Endocytosis; Phospholipase D signaling pathway                                                                                                                                                                                                                             | 101.1 | 94.1  | 82.5  | 81.9  | 94.1  | 99.7  | 102   | 106.4 |
| 254675232 | 2210016F16Rik | 338  | 38.6  |                                                                                                                                                                                                                                                                            | 112   | 109.7 | 109.6 | 111.2 | 88.5  | 87.8  | 85.6  | 81.7  |
| 227330595 | Fip1l1        | 581  | 64.9  | mRNA surveillance pathway                                                                                                                                                                                                                                                  | 95.3  | 121.9 | 103.1 | 100.6 | 106.3 | 101   | 106.5 | 104.6 |
| 21450323  | Hnrnpull1     | 859  | 95.9  | Influenza A                                                                                                                                                                                                                                                                | 108.5 | 105.7 | 104.8 | 102.6 | 87.8  | 91.6  | 93.4  | 95.4  |
| 6996911   | Ass1          | 412  | 46.6  | Metabolic pathways; Biosynthesis of amino acids; Alanine, aspartate and glutamate metabolism; Arginine biosynthesis                                                                                                                                                        | 116.8 | 115.8 | 99.1  | 99.8  | 85.1  | 83.9  | 81.8  | 83.6  |
| 294832004 | Ints1         | 2222 | 247.8 |                                                                                                                                                                                                                                                                            | 97.5  | 107.1 | 104.4 | 100.3 | 105.5 | 109.9 | 94.7  | 88.8  |
| 31980912  | Paf1          | 535  | 60.5  |                                                                                                                                                                                                                                                                            | 99.3  | 100.6 | 99.1  | 100.4 | 107.4 | 107.3 | 102.3 | 99.2  |
| 21311877  | Parn          | 624  | 71.5  | RNA degradation                                                                                                                                                                                                                                                            | 102.9 | 102.6 | 98.8  | 100.7 | 95.7  | 101.4 | 98.8  | 92    |
| 161169020 | Zc3h4         | 1255 | 135.9 |                                                                                                                                                                                                                                                                            | 105.6 | 118.3 | 100.7 | 101.1 | 92.8  | 102.6 | 105.3 | 100.9 |
| 27734986  | Ahcy1l        | 530  | 58.9  | Metabolic pathways; Cysteine and methionine metabolism                                                                                                                                                                                                                     | 102.3 | 102.5 | 95.9  | 96.3  | 108.5 | 107.6 | 105.1 | 101.4 |
| 31543330  | Nnt           | 1086 | 113.8 |                                                                                                                                                                                                                                                                            | 112.3 | 107.9 | 98    | 99.3  | 108   | 109.3 | 95.7  | 93.4  |



|           |                     |      |       |                                                                                                                                                                                                        |       |       |       |       |       |       |       |       |
|-----------|---------------------|------|-------|--------------------------------------------------------------------------------------------------------------------------------------------------------------------------------------------------------|-------|-------|-------|-------|-------|-------|-------|-------|
| 10946678  | Drg2                | 364  | 40.7  |                                                                                                                                                                                                        | 96.6  | 95.2  | 86.6  | 85.4  | 112.9 | 114   | 107.5 | 103.3 |
| 22203753  | Ppa2                | 330  | 38.1  | Oxidative phosphorylation                                                                                                                                                                              | 112.7 | 111.1 | 113.9 | 111.7 | 87.5  | 91.2  | 89.7  | 94.9  |
| 95772123  | Ppp1r12a            | 1004 | 111.7 | Oxytocin signaling pathway; Regulation of actin cytoskeleton; Focal adhesion; Platelet activation; Proteoglycans in cancer; cGMP-PKG signaling pathway; cAMP signaling pathway; Vascular smooth muscle | 102.7 | 108.7 | 101.7 | 99.9  | 94.3  | 91.4  | 101.4 | 100   |
| 238624151 | Rin3                | 980  | 107.2 |                                                                                                                                                                                                        | 105.2 | 108.9 | 100.3 | 98.2  | 91.5  | 94.6  | 96.6  | 91.8  |
| 16418339  | Rpl10;<br>Rpl10-ps1 | 214  | 24.6  | Ribosome                                                                                                                                                                                               | 89    | 89.5  | 90.6  | 89.3  | 112.8 | 115.9 | 79.9  | 78    |
| 110224447 | Txnrd1              | 613  | 67    | Selenocompound metabolism; Pyrimidine metabolism                                                                                                                                                       | 102.5 | 105.1 | 95.2  | 95.6  | 104.9 | 101.2 | 103.7 | 103   |
| 12584984  | Pes1                | 584  | 67.8  |                                                                                                                                                                                                        | 80.4  | 82.6  | 83.3  | 82.3  | 122.1 | 121.5 | 125.6 | 124.4 |
| 485050304 | Casp8               | 500  | 57.8  |                                                                                                                                                                                                        | 101.8 | 103.5 | 101.5 | 104.3 | 93.5  | 87.1  | 98.2  | 92.9  |
| 19527388  | Otub1               | 271  | 31.3  |                                                                                                                                                                                                        | 112.4 | 116.3 | 110.8 | 112.7 | 82.9  | 83.7  | 83.8  | 83.2  |
| 29126213  | D19Bwg1<br>357e;    | 648  | 72.9  |                                                                                                                                                                                                        | 92    | 90.5  | 91.2  | 91.1  | 107.9 | 110.6 | 113   | 111.9 |
| 33504483  | Rps9                | 194  | 22.6  | Ribosome                                                                                                                                                                                               | 78.8  | 78    | 91.4  | 90.7  | 129.7 | 125.2 | 105.5 | 101.6 |
| 114158691 | Cops8               | 209  | 23.2  |                                                                                                                                                                                                        | 103.9 | 108.2 | 91.9  | 92.1  | 98.1  | 96.5  | 103.6 | 100.1 |
| 70608194  | Tpd52               | 247  | 26.9  |                                                                                                                                                                                                        | 114.7 | 112.6 | 107.6 | 101   | 90.5  | 90.2  | 108.2 | 115.4 |
| 84871986  | Gpx1                | 201  | 22.3  | Glutathione metabolism; Amyotrophic lateral sclerosis (ALS); Thyroid hormone synthesis; Huntington's disease; Arachidonic acid metabolism                                                              | 125.3 | 121.3 | 119.3 | 118   | 75.2  | 77.4  | 70.8  | 74.4  |
| 344217719 | Pde2a               | 945  | 106.3 |                                                                                                                                                                                                        | 116.3 | 112.5 | 126.5 | 123.3 | 85.4  | 85.7  | 85.7  | 87.5  |
| 20373163  | Scrib               | 1665 | 179.6 |                                                                                                                                                                                                        | 94.9  | 109.6 | 92.7  | 78.9  | 112.4 | 117.4 | 104.3 | 102.6 |
| 22219434  | Nrbp1               | 535  | 59.8  |                                                                                                                                                                                                        | 102.3 | 98.8  | 98.8  | 101.9 | 93.9  | 98.1  | 97    | 96.1  |
| 126090857 | Fam120a             | 1112 | 121.6 |                                                                                                                                                                                                        | 99.2  | 93.3  | 91.8  | 91.7  | 108.1 | 110   | 106.5 | 110.6 |
| 13386044  | Chd11               | 900  | 101.4 |                                                                                                                                                                                                        | 95.9  | 97.3  | 92.2  | 95.6  | 112   | 110.6 | 104.2 | 106.3 |
| 169790820 | Dazap1              | 406  | 43.2  | mRNA surveillance pathway                                                                                                                                                                              | 103.7 | 102.5 | 112.9 | 134.8 | 94.4  | 104.5 | 97    | 92.6  |
| 70608119  | Dffa                | 331  | 36.6  | Apoptosis                                                                                                                                                                                              | 121.5 | 115.1 | 130.3 | 125.1 | 75.6  | 77.4  | 78.6  | 81.1  |
| 13385854  | Ppid                | 370  | 40.7  |                                                                                                                                                                                                        | 86.9  | 89.7  | 97.1  | 95.5  | 106.9 | 107.8 | 116.8 | 110.9 |
| 295424137 | Gps1                | 526  | 58.8  |                                                                                                                                                                                                        | 98.7  | 99.2  | 97.5  | 97.2  | 104   | 103   | 103.7 | 100   |
| 162287131 | Map1s;<br>Mtap1s    | 973  | 102.9 |                                                                                                                                                                                                        | 104.3 | 111   | 108.2 | 106.8 | 96.6  | 99.2  | 94.4  | 93.3  |
| 22122445  | Cdc73               | 531  | 60.5  |                                                                                                                                                                                                        | 99.5  | 100.2 | 98.2  | 102.2 | 103.5 | 98.6  | 103.5 | 97.3  |
| 126506294 | Tsr1                | 803  | 92    |                                                                                                                                                                                                        | 97.4  | 104.1 | 95.5  | 94    | 106.8 | 101.5 | 105.4 | 106.5 |
| 256985211 | Magohb              | 148  | 17.3  | mRNA surveillance pathway; Spliceosome; RNA transport                                                                                                                                                  | 94.1  | 96.2  | 118.7 | 112.5 | 106.3 | 98.7  | 81.3  | 82.7  |
| 309265531 | Gm9835;<br>Gmfg-ps  | 165  | 19.3  |                                                                                                                                                                                                        | 128.2 | 125.8 | 125.3 | 123.2 | 68.2  | 68.7  | 76.6  | 74.2  |
| 21914853  | Papola              | 739  | 82.3  | mRNA surveillance pathway                                                                                                                                                                              | 108.7 | 110.2 | 95.1  | 96    | 97.7  | 95.1  | 104.6 | 103   |
| 27754031  | Snx6                | 406  | 46.6  | Endocytosis                                                                                                                                                                                            | 108.1 | 106.6 | 96.7  | 94.1  | 98.1  | 93.3  | 95.2  | 89.5  |
| 46909607  | Ogt                 | 1046 | 116.9 | Insulin resistance; Other types of O-glycan biosynthesis                                                                                                                                               | 95.9  | 112.9 | 85.4  | 85.9  | 106.7 | 103.9 | 118.2 | 110   |
| 8393866   | Oat                 | 439  | 48.3  | Arginine and proline metabolism; Metabolic pathways                                                                                                                                                    | 81    | 79.3  | 73.6  | 75.3  | 132.6 | 133.4 | 140.3 | 140.5 |

|           |                             |      |       |                                                                                                                                                                                                                                                                |       |       |       |       |       |       |       |       |
|-----------|-----------------------------|------|-------|----------------------------------------------------------------------------------------------------------------------------------------------------------------------------------------------------------------------------------------------------------------|-------|-------|-------|-------|-------|-------|-------|-------|
| 6754186   | Hexb                        | 536  | 61.1  | Glycosphingolipid biosynthesis - globo and isoglobo series; Metabolic pathways; Lysosome; Amino sugar and nucleotide sugar metabolism; Glycosphingolipid biosynthesis - ganglio series; Glycosaminoglycan degradation; Other glycan degradation                | 125.8 | 125   | 115.9 | 115   | 86.4  | 83.2  | 82.3  | 80.2  |
| 27369527  | Cdkn2aip                    | 563  | 59.7  |                                                                                                                                                                                                                                                                | 107.7 | 113.1 | 105.6 | 104.9 | 82.7  | 88.7  | 90.4  | 93.2  |
| 21450111  | Eml3                        | 897  | 95.6  |                                                                                                                                                                                                                                                                | 126   | 103.2 | 118.9 | 98.2  | 85.2  | 95.4  | 99.1  | 98.8  |
| 21450209  | Utp6                        | 597  | 70.4  | Ribosome biogenesis in eukaryotes                                                                                                                                                                                                                              | 98.7  | 95.1  | 87.4  | 89.1  | 115.3 | 117.2 | 117.6 | 118.3 |
| 18250284  | Idh3a                       | 366  | 39.6  | Citrate cycle (TCA cycle); Metabolic pathways; Biosynthesis of amino acids; 2-Oxocarboxylic acid metabolism; Carbon metabolism                                                                                                                                 | 108.9 | 108.3 | 108.9 | 111.8 | 102.5 | 98.2  | 70.9  | 81.2  |
| 110347487 | Aco1                        | 889  | 98.1  | Citrate cycle (TCA cycle); Metabolic pathways; Biosynthesis of amino acids; 2-Oxocarboxylic acid metabolism; Carbon metabolism; Glvovxlate and                                                                                                                 | 101.8 | 104.8 | 130.8 | 122.6 | 120.7 | 112.3 | 79.6  | 86    |
| 38016154  | Nup50                       | 466  | 49.5  | RNA transport                                                                                                                                                                                                                                                  | 95.4  | 98.2  | 94.6  | 96.7  | 107.1 | 107.4 | 108.2 | 105.1 |
| 56699440  | Dhx8                        | 1244 | 142.5 | Spliceosome                                                                                                                                                                                                                                                    | 100.3 | 107.8 | 101.9 | 104.5 | 103.5 | 98.4  | 96.9  | 99.8  |
| 406855427 | Xpnpep1                     | 666  | 74.5  |                                                                                                                                                                                                                                                                | 95.3  | 97.1  | 91.4  | 90.2  | 104.8 | 103.3 | 102.2 | 103   |
| 21312544  | Ifi35                       | 286  | 31.9  |                                                                                                                                                                                                                                                                | 106.5 | 109.9 | 99.9  | 100.7 | 86.1  | 86.1  | 93.9  | 95.7  |
| 225637531 | Eif3f                       | 361  | 38    | RNA transport                                                                                                                                                                                                                                                  | 87.1  | 89.7  | 86.3  | 86.9  | 110.5 | 103.3 | 112.5 | 112   |
| 117647283 | Ddx55                       | 600  | 68.4  |                                                                                                                                                                                                                                                                | 103.4 | 104.2 | 100.7 | 100.5 | 95.1  | 94.7  | 91.3  | 95.1  |
| 114326538 | Nfyc                        | 335  | 37.2  | Tuberculosis; Antigen processing and presentation                                                                                                                                                                                                              | 113.4 | 113.3 | 109   | 106.7 | 90    | 90.2  | 85.5  | 86.3  |
| 6680237   | Hn1; Jpt1                   | 154  | 16.1  |                                                                                                                                                                                                                                                                | 108.8 | 109.1 | 105   | 106   | 85.3  | 86.3  | 106.7 | 106.7 |
| 255003740 | 1200014J<br>11Rik;<br>Ncbp3 | 615  | 70    |                                                                                                                                                                                                                                                                | 98.1  | 107.7 | 101   | 104.2 | 100   | 96.4  | 98.5  | 93.9  |
| 30519997  | Blmh                        | 455  | 52.5  |                                                                                                                                                                                                                                                                | 95.3  | 93.9  | 93.2  | 93.9  | 105.1 | 106   | 102.6 | 102.7 |
| 55925589  | Prpf4                       | 521  | 58.3  | Spliceosome                                                                                                                                                                                                                                                    | 95.7  | 99.1  | 99.1  | 99.2  | 103.1 | 100.8 | 106.6 | 106.3 |
| 58218988  | Acs15                       | 683  | 76.2  | PPAR signaling pathway; Fatty acid metabolism; Metabolic pathways; Fatty acid degradation; Adipocytokine signaling pathway; Fatty acid biosynthesis; Peroxisome                                                                                                | 90.8  | 90.1  | 90    | 89.6  | 107.1 | 110.9 | 114.2 | 111.8 |
| 34538601  | COX2                        | 227  | 26    | Metabolic pathways; Huntington's disease; Non-alcoholic fatty liver disease (NAFLD); Oxidative phosphorylation; Parkinson's disease; Alzheimer's disease; Cardiac muscle contraction                                                                           | 118.1 | 116.7 | 101.1 | 97.7  | 91.4  | 87.8  | 84.4  | 82.3  |
| 257900472 | Pelp1                       | 1123 | 118   |                                                                                                                                                                                                                                                                | 93.8  | 100.1 | 92.5  | 94.4  | 102.4 | 107.8 | 111.7 | 102.2 |
| 125987599 | Cd2ap                       | 637  | 70.4  | Bacterial invasion of epithelial cells                                                                                                                                                                                                                         | 105.9 | 107.4 | 103   | 104.3 | 92.3  | 96    | 96.8  | 97.2  |
| 31982856  | Dld                         | 509  | 54.2  | Pyruvate metabolism; Citrate cycle (TCA cycle); Valine, leucine and isoleucine degradation; Metabolic pathways; Glycine, serine and threonine metabolism; Glycolysis / Gluconeogenesis; Propanoate metabolism; Carbon metabolism; Glvovxlate and dicarboxylate | 101.6 | 100.9 | 102.8 | 101.7 | 98.2  | 99.2  | 99.5  | 99.1  |
| 6753494   | Coro1b                      | 484  | 53.9  |                                                                                                                                                                                                                                                                | 111.4 | 110.3 | 113.1 | 121.1 | 81.7  | 84.3  | 81.3  | 85.8  |
| 31980922  | Eef1b2                      | 225  | 24.7  |                                                                                                                                                                                                                                                                | 83.1  | 85.1  | 71.6  | 75.2  | 110.2 | 103.4 | 133.2 | 135.9 |

|           |                   |      |       |                                                                                                                                                                                                                                                                 |       |       |       |       |       |       |       |       |
|-----------|-------------------|------|-------|-----------------------------------------------------------------------------------------------------------------------------------------------------------------------------------------------------------------------------------------------------------------|-------|-------|-------|-------|-------|-------|-------|-------|
| 282847442 | Ipcefl            | 406  | 45.8  |                                                                                                                                                                                                                                                                 | 104.3 | 97.2  | 91.9  | 92.3  | 102.4 | 100.5 | 97.2  | 96.1  |
| 58037145  | Snrpd2            | 118  | 13.5  | Spliceosome                                                                                                                                                                                                                                                     | 106.5 | 104.9 | 95.8  | 97.5  | 94.6  | 96.6  | 105.6 | 102.3 |
| 46852276  | Dhx29             | 1365 | 153.9 |                                                                                                                                                                                                                                                                 | 97.2  | 96.9  | 87.1  | 97.4  | 112.9 | 108.3 | 110.6 | 101.6 |
| 163954941 | Fxr1              | 677  | 76.2  | RNA transport                                                                                                                                                                                                                                                   | 90.4  | 90.5  | 87.8  | 85.2  | 111.9 | 111.8 | 113.1 | 117.2 |
| 21704042  | Cstf3             | 717  | 82.8  | mRNA surveillance pathway                                                                                                                                                                                                                                       | 107.7 | 113   | 93.6  | 96.4  | 93.7  | 93.7  | 98.1  | 99.7  |
| 6755196   | Psm4              | 261  | 29.5  | Proteasome                                                                                                                                                                                                                                                      | 98.6  | 99.4  | 101   | 98.6  | 102.7 | 101.5 | 94.1  | 92.8  |
| 91598896  | Mta1              | 698  | 79.1  |                                                                                                                                                                                                                                                                 | 95.4  | 93.7  | 96.7  | 93.2  | 103.3 | 101.1 | 107.4 | 108   |
| 33147082  | Bag6              | 1154 | 121   |                                                                                                                                                                                                                                                                 | 97.9  | 89.9  | 94.9  | 91.4  | 119.9 | 118.5 | 91.9  | 98.8  |
| 140970573 | Rabep2            | 554  | 62.1  |                                                                                                                                                                                                                                                                 | 102.4 | 105.1 | 103.3 | 99.3  | 93.5  | 89.1  | 111   | 102.2 |
| 312836821 | Spag9             | 1321 | 146.1 |                                                                                                                                                                                                                                                                 | 95.3  | 93.6  | 84.6  | 86.8  | 105   | 102.6 | 100.1 | 102.7 |
| 295444834 | Agps              | 671  | 74.3  | Metabolic pathways; Ether lipid metabolism; Peroxisome                                                                                                                                                                                                          | 93.1  | 90    | 92.9  | 89.1  | 107.4 | 112.4 | 111   | 112.2 |
| 357394770 | Rapgef6           | 1606 | 179.7 | Rap1 signaling pathway                                                                                                                                                                                                                                          | 103.5 | 101.6 | 101.5 | 106.2 | 95    | 95.3  | 97.7  | 90.3  |
| 86262142  | Rbm14             | 669  | 69.4  |                                                                                                                                                                                                                                                                 | 106.3 | 106.2 | 102.7 | 101.3 | 91    | 94.5  | 97.5  | 95.5  |
| 156713463 | Sephs1            | 392  | 42.9  | Metabolic pathways; Selenocompound metabolism                                                                                                                                                                                                                   | 105.7 | 104   | 108   | 105.5 | 90.3  | 91.9  | 96.1  | 94.9  |
| 124486686 | Xpot              | 962  | 109.7 | RNA transport                                                                                                                                                                                                                                                   | 85    | 77.1  | 82.2  | 79.4  | 115.7 | 116.9 | 116   | 115.9 |
| 255003757 | Dpp9              | 862  | 97.9  |                                                                                                                                                                                                                                                                 | 102.4 | 102.2 | 100   | 98.6  | 95.2  | 92.5  | 98.6  | 91.6  |
| 124249066 | Rbm15             | 962  | 105.7 |                                                                                                                                                                                                                                                                 | 98    | 95.9  | 117   | 121.7 | 107   | 118   | 97.3  | 97.6  |
| 9506945   | Pabpn1            | 302  | 32.3  | mRNA surveillance pathway; Influenza A                                                                                                                                                                                                                          | 110.8 | 112.9 | 99.2  | 102.3 | 89.3  | 90.5  | 102.8 | 102.6 |
| 256773209 | H2afv             | 128  | 13.5  | Alcoholism; Systemic lupus erythematosus                                                                                                                                                                                                                        | 97.5  | 94.1  | 100   | 101   | 79.2  | 78.5  | 87.5  | 86.2  |
| 123314454 | Fam65b;<br>Ripor2 | 633  | 70.4  |                                                                                                                                                                                                                                                                 | 114.4 | 122.5 | 121.9 | 129.1 | 80.4  | 71.7  | 75.2  | 69.2  |
| 309269866 | Gm2423            | 319  | 35.6  |                                                                                                                                                                                                                                                                 | 112.7 | 110.6 | 103.7 | 103.1 | 106   | 108.6 | 110.1 | 107.1 |
| 28077067  | Tbcd              | 1196 | 133.2 |                                                                                                                                                                                                                                                                 | 93.3  | 94.7  | 95.3  | 98.3  | 107.9 | 106.7 | 104.5 | 98.4  |
| 17157989  | Msi2              | 346  | 36.9  | mRNA surveillance pathway                                                                                                                                                                                                                                       | 90.3  | 90.2  | 86.2  | 85.5  | 112.2 | 112.9 | 115.2 | 114.1 |
| 29789289  | Echs1             | 290  | 31.5  | Fatty acid metabolism; Tryptophan metabolism; Valine, leucine and isoleucine degradation; Metabolic pathways; Lysine degradation; Fatty acid degradation; Butanoate metabolism; beta-Alanine metabolism; Propanoate metabolism; Fatty acid elongation; Carbon m | 109.9 | 104.9 | 100.9 | 103.5 | 90.3  | 94.7  | 95.3  | 95    |
| 312261274 | Wdr12             | 423  | 47.3  |                                                                                                                                                                                                                                                                 | 95.2  | 92.4  | 88.4  | 88.7  | 111.8 | 112.3 | 109.9 | 103   |
| 247269309 | Cmas              | 432  | 48    | Metabolic pathways; Amino sugar and nucleotide sugar metabolism                                                                                                                                                                                                 | 112.5 | 114.3 | 110.9 | 109.9 | 88.2  | 84.9  | 84.1  | 85.7  |
| 170650647 | Arhgef2           | 985  | 111.9 |                                                                                                                                                                                                                                                                 | 91.3  | 92.9  | 90.3  | 89.4  | 112.9 | 109.8 | 116.1 | 112.3 |
| 22164792  | Mrpl12            | 201  | 21.7  | Ribosome                                                                                                                                                                                                                                                        | 97.1  | 98.1  | 89.3  | 94.6  | 114   | 119.2 | 124.6 | 114.9 |
| 163937861 | Grwd1             | 446  | 49.2  |                                                                                                                                                                                                                                                                 | 84.2  | 83.3  | 91.7  | 87.8  | 123.8 | 122.3 | 110.8 | 112.8 |
| 31982273  | Hsd17b4           | 735  | 79.4  | Metabolic pathways; Primary bile acid biosynthesis; Peroxisome                                                                                                                                                                                                  | 93.8  | 91.8  | 87.9  | 86.8  | 110.9 | 107.6 | 92.7  | 97.2  |
| 6755899   | Tsn               | 228  | 26.2  |                                                                                                                                                                                                                                                                 | 111.4 | 114.1 | 106.4 | 108.4 | 90.5  | 92.9  | 95.4  | 94.6  |
| 7657031   | Nt5c              | 200  | 23.1  | Metabolic pathways; Nicotinate and nicotinamide metabolism; Purine metabolism; Pyrimidine metabolism                                                                                                                                                            | 121.5 | 119.8 | 105.4 | 109.7 | 82.6  | 82.9  | 86    | 86.8  |
| 24418933  | Acsf2             | 615  | 67.9  |                                                                                                                                                                                                                                                                 | 114.7 | 121.7 | 127.6 | 112   | 86.6  | 88.4  | 84    | 90    |

|           |          |      |       |                                                                                                                                                                                                             |       |       |       |       |       |       |       |       |
|-----------|----------|------|-------|-------------------------------------------------------------------------------------------------------------------------------------------------------------------------------------------------------------|-------|-------|-------|-------|-------|-------|-------|-------|
| 7106399   | Rrm2     | 390  | 45.1  | Glutathione metabolism; p53 signaling pathway; Metabolic pathways; Purine metabolism; Pyrimidine metabolism                                                                                                 | 48.4  | 46.7  | 44    | 40.9  | 171.3 | 174.3 | 208.1 | 198.4 |
| 6680658   | Adprh    | 362  | 40    |                                                                                                                                                                                                             | 106.7 | 102.3 | 103.2 | 103.7 | 96.8  | 101.5 | 105.4 | 99.1  |
| 109150409 | Scaf4    | 1209 | 131.6 |                                                                                                                                                                                                             | 101.8 | 104.8 | 105.5 | 114.3 | 92.8  | 96.2  | 102.7 | 103.4 |
| 229608946 | Tor1aip1 | 576  | 64.8  |                                                                                                                                                                                                             | 106.3 | 104.1 | 100.7 | 98.8  | 96    | 88.9  | 82.1  | 87.7  |
| 123701991 | Rbm26    | 983  | 110.9 |                                                                                                                                                                                                             | 95.3  | 94.3  | 98.2  | 92    | 98.6  | 98.3  | 100.5 | 96.3  |
| 125656157 | Nudt16   | 195  | 21.8  | RNA degradation; Purine metabolism                                                                                                                                                                          | 124.4 | 118.7 | 108   | 107.2 | 84.2  | 89.1  | 78.6  | 82.9  |
| 159032037 | Celf2    | 490  | 52.2  |                                                                                                                                                                                                             | 108.2 | 101.6 | 95.4  | 100.4 | 91.5  | 95.2  | 98.5  | 96.9  |
| 269954698 | Sec24c   | 1096 | 118.5 |                                                                                                                                                                                                             | 97    | 102.9 | 94.1  | 90.5  | 104.4 | 104.4 | 98.5  | 99    |
| 6754508   | Lasp1    | 263  | 30    |                                                                                                                                                                                                             | 126.9 | 120.6 | 118.8 | 114.2 | 67    | 72.9  | 78.7  | 81.1  |
| 25014095  | Parp3    | 528  | 59.4  | Base excision repair; Apoptosis                                                                                                                                                                             | 116.2 | 113.9 | 97.8  | 96.6  | 88.1  | 88.7  | 87.1  | 81.5  |
| 145553997 | Arid1b   | 2244 | 237.6 |                                                                                                                                                                                                             | 126.3 | 115.6 | 99.4  | 103.8 | 91.6  | 93.6  | 108.6 | 100.9 |
| 239916007 | Rfx1     | 963  | 103.6 |                                                                                                                                                                                                             | 101.9 | 115.8 | 107.5 | 100.1 | 91.9  | 89.2  | 94.5  | 96.8  |
| 84781800  | Rcsd1    | 412  | 44.1  |                                                                                                                                                                                                             | 130.5 | 129.2 | 115   | 117.5 | 73.4  | 76.4  | 93.1  | 91.6  |
| 47271396  | Gnas     | 1133 | 121.4 |                                                                                                                                                                                                             | 91.6  | 94.5  | 97.2  | 92    | 99.5  | 109.6 | 104.4 | 108.7 |
| 6753674   | Dpp4     | 760  | 87.4  | Protein digestion and absorption                                                                                                                                                                            | 94.4  | 97.9  | 91.7  | 90.7  | 105.2 | 99.4  | 115.8 | 120.7 |
| 241896997 | Wdr43    | 677  | 75.3  | Ribosome biogenesis in eukaryotes                                                                                                                                                                           | 82.8  | 86.9  | 81.4  | 84.2  | 120.6 | 121.5 | 113.1 | 112.6 |
| 37537518  | Agk      | 421  | 46.9  | Metabolic pathways; Glycerolipid metabolism                                                                                                                                                                 | 103.5 | 102.8 | 105   | 103.5 | 95    | 97.1  | 94    | 97.2  |
| 124487265 | Bod11    | 3032 | 327.3 |                                                                                                                                                                                                             | 111   | 106.1 | 100.6 | 106.9 | 98    | 95.5  | 96.6  | 100.4 |
| 70909327  | Cops2    | 443  | 51.6  |                                                                                                                                                                                                             | 99    | 100.7 | 97.4  | 99.4  | 98.3  | 101.6 | 93.3  | 81.2  |
| 124487291 | Cwf1911  | 537  | 60.2  |                                                                                                                                                                                                             | 106.6 | 108.7 | 105.6 | 105.7 | 91.4  | 96    | 90.9  | 88.4  |
| 19527234  | Mat2b    | 334  | 37.4  | Metabolic pathways; Biosynthesis of amino acids; Cysteine and methionine metabolism                                                                                                                         | 105.4 | 104.2 | 97.8  | 96.2  | 94    | 93.8  | 100.8 | 98.9  |
| 6680229   | Hmgb2    | 210  | 24.1  |                                                                                                                                                                                                             | 97    | 98.4  | 120   | 120.9 | 86.9  | 89.1  | 59.5  | 64    |
| 31542614  | Ercc2    | 760  | 86.8  | Basal transcription factors; Nucleotide excision repair                                                                                                                                                     | 112.3 | 112.7 | 85.9  | 90.2  | 100.1 | 103.5 | 91.6  | 94.5  |
| 28173550  | Sept7    | 437  | 50.6  |                                                                                                                                                                                                             | 94.4  | 91.7  | 96.9  | 97.5  | 97.4  | 101   | 102.2 | 107.9 |
| 19482160  | Cotl1    | 142  | 15.9  |                                                                                                                                                                                                             | 121.5 | 119   | 133.3 | 136.6 | 67.2  | 67.8  | 76.6  | 76.1  |
| 6756049   | Zfp148   | 794  | 88.7  |                                                                                                                                                                                                             | 116.6 | 109.5 | 103.8 | 95    | 95    | 95.3  | 94.4  | 92.4  |
| 31560391  | Pdcd10   | 212  | 24.7  |                                                                                                                                                                                                             | 115   | 115.1 | 110.1 | 108.2 | 89.2  | 88.8  | 92.8  | 92.9  |
| 39930425  | Gtf2f2   | 249  | 28.4  | Basal transcription factors                                                                                                                                                                                 | 96.9  | 91.7  | 99.5  | 102   | 98.8  | 99.7  | 109.1 | 109.6 |
| 114326546 | Pgam1    | 254  | 28.8  | Metabolic pathways; Biosynthesis of amino acids; Glycine, serine and threonine metabolism; Glycolysis / Gluconeogenesis; Carbon metabolism; Central carbon metabolism in cancer; Glucagon signaling pathway | 91.2  | 91.7  | 91.9  | 95.2  | 104.1 | 105.1 | 114.5 | 111.8 |
| 13385374  | Rab5a    | 215  | 23.6  | Endocytosis; Ras signaling pathway; Amyotrophic lateral sclerosis (ALS); Tuberculosis; Phagosome; Vasopressin-regulated water reabsorption; Amoebiasis                                                      | 114.6 | 108.1 | 106.8 | 106.8 | 94.4  | 96.4  | 92.9  | 96.6  |
| 304555605 | Igbp1    | 340  | 38.9  |                                                                                                                                                                                                             | 96.8  | 96.3  | 101.6 | 102.1 | 100.5 | 98.7  | 104.5 | 102.9 |
| 29789158  | Nhlrc2   | 725  | 78.4  |                                                                                                                                                                                                             | 98    | 105   | 104.2 | 102.7 | 101.6 | 100.1 | 94    | 88.6  |
| 317008614 | Tmppe    | 447  | 49.4  |                                                                                                                                                                                                             | 106   | 129.5 | 102.7 | 102.2 | 98.4  | 94.8  | 85.9  | 81.8  |

|           |         |      |       |                                                                                                                                                                                                                                                                 |       |       |       |       |       |       |       |       |
|-----------|---------|------|-------|-----------------------------------------------------------------------------------------------------------------------------------------------------------------------------------------------------------------------------------------------------------------|-------|-------|-------|-------|-------|-------|-------|-------|
| 46877052  | Elmo2   | 732  | 83.8  | Bacterial invasion of epithelial cells                                                                                                                                                                                                                          | 105.5 | 115.6 | 105.5 | 103.5 | 102   | 95.1  | 82.6  | 92.3  |
| 127139524 | Trim21  | 462  | 53.3  | Systemic lupus erythematosus                                                                                                                                                                                                                                    | 99.4  | 102.3 | 93.3  | 97.4  | 101.4 | 96.1  | 92    | 91.4  |
| 9506981   | Exosc9  | 438  | 48.9  | RNA degradation                                                                                                                                                                                                                                                 | 97    | 99.2  | 107.4 | 108.7 | 105.9 | 104.1 | 90.3  | 88    |
| 124244040 | Eif3j1  | 261  | 29.3  | RNA transport                                                                                                                                                                                                                                                   | 95.3  | 95.6  | 89.2  | 89.2  | 105.6 | 105.2 | 109.8 | 114.1 |
| 21313560  | Dimt1   | 313  | 35.3  |                                                                                                                                                                                                                                                                 | 94    | 93.3  | 98.1  | 95.7  | 107.3 | 105.1 | 110.2 | 106.9 |
| 121674793 | Rnps1   | 305  | 34.2  | mRNA surveillance pathway; RNA transport                                                                                                                                                                                                                        | 102.1 | 106.9 | 99.3  | 100.9 | 100.9 | 101.3 | 96    | 84.9  |
| 13399310  | Rps10   | 165  | 18.9  | Ribosome                                                                                                                                                                                                                                                        | 89    | 87    | 89.9  | 88.7  | 99.4  | 100.3 | 124.7 | 125.8 |
| 186700620 | Mccc1   | 717  | 79.3  | Valine, leucine and isoleucine degradation; Metabolic pathways                                                                                                                                                                                                  | 111.7 | 111.1 | 112.5 | 117.8 | 96.6  | 96.4  | 92.3  | 90.7  |
| 255708439 | Pik3cd  | 1047 | 120.1 |                                                                                                                                                                                                                                                                 | 110.1 | 108   | 109.4 | 109.4 | 87.9  | 88.4  | 83.1  | 82.9  |
| 164698440 | Bysl    | 436  | 49.8  |                                                                                                                                                                                                                                                                 | 98.6  | 99.4  | 96.7  | 94.1  | 106.1 | 103.8 | 111.8 | 111.5 |
| 205277432 | Hectd1  | 2610 | 289   |                                                                                                                                                                                                                                                                 | 88.4  | 89.6  | 86.9  | 86.2  | 125.2 | 123.7 | 118.2 | 116.2 |
| 6679573   | Pura    | 321  | 34.9  |                                                                                                                                                                                                                                                                 | 94.6  | 100.7 | 106.5 | 109.8 | 101.1 | 94.6  | 100.9 | 98.8  |
| 61098124  | Fam98b  | 429  | 45.3  |                                                                                                                                                                                                                                                                 | 98.7  | 100.9 | 99.5  | 103.6 | 108.4 | 107.7 | 86    | 89.6  |
| 11528490  | Flii    | 1271 | 144.7 |                                                                                                                                                                                                                                                                 | 103.9 | 111.2 | 100.2 | 104.4 | 93.1  | 95.6  | 93.6  | 89.4  |
| 134053947 | Bin1    | 477  | 52.7  |                                                                                                                                                                                                                                                                 | 126.1 | 118.6 | 110.4 | 106.1 | 80.6  | 87.2  | 81.3  | 88.2  |
| 407262659 | Pwp2    | 919  | 102.8 | Ribosome biogenesis in eukaryotes                                                                                                                                                                                                                               | 96.1  | 93.8  | 93.6  | 89.8  | 107.4 | 114.8 | 111.9 | 110   |
| 9789985   | Ivd     | 424  | 46.3  | Valine, leucine and isoleucine degradation; Metabolic pathways                                                                                                                                                                                                  | 121.6 | 121.2 | 106.3 | 108.6 | 78.8  | 83.4  | 94    | 92.7  |
| 6755376   | Rps7    | 194  | 22.1  | Ribosome                                                                                                                                                                                                                                                        | 87.7  | 88.9  | 90.3  | 89.8  | 113   | 112   | 112.6 | 109.2 |
| 255003723 | Morc3   | 942  | 106.5 |                                                                                                                                                                                                                                                                 | 107.3 | 117.2 | 106.2 | 101   | 98.6  | 92.3  | 88.8  | 91    |
| 162287102 | Eif2b3  | 452  | 50.5  | RNA transport                                                                                                                                                                                                                                                   | 90.3  | 92.8  | 96.9  | 100.1 | 113.5 | 114.7 | 117.8 | 99.7  |
| 84000007  | Grk6    | 589  | 67.1  |                                                                                                                                                                                                                                                                 | 131.1 | 141.4 | 103.1 | 100.4 | 88.3  | 84    | 82.6  | 79.1  |
| 31543974  | Ywhab   | 246  | 28.1  | Epstein-Barr virus infection; Hippo signaling pathway; Hepatitis B; Oocyte meiosis; Cell cycle; PI3K-Akt signaling pathway; Viral carcinogenesis                                                                                                                | 114.1 | 107.1 | 108.3 | 109   | 87.5  | 81.5  | 89.9  | 88    |
| 228008323 | Anapc1  | 1944 | 215.9 | Progesterone-mediated oocyte maturation; Ubiquitin mediated proteolysis; HTLV-I infection; Oocyte meiosis;                                                                                                                                                      | 96.5  | 98.6  | 94.8  | 101.8 | 109.2 | 111.8 | 104   | 94.1  |
| 21313618  | Chchd3  | 227  | 26.3  |                                                                                                                                                                                                                                                                 | 94.1  | 94.3  | 101.5 | 107.4 | 104.9 | 113   | 110.6 | 110.1 |
| 7304971   | Cops5   | 334  | 37.5  |                                                                                                                                                                                                                                                                 | 98.3  | 95.8  | 95.4  | 94.4  | 109.3 | 108   | 107   | 101   |
| 54291704  | Pacs1   | 961  | 104.8 |                                                                                                                                                                                                                                                                 | 115.6 | 113.9 | 113.7 | 113.1 | 94    | 93.1  | 95.2  | 97.1  |
| 47458804  | Stat3   | 770  | 88    | FoxO signaling pathway; Acute myeloid leukemia; AGE-RAGE signaling pathway in diabetic complications; MicroRNAs in cancer; Prolactin signaling pathway; Jak-STAT signaling pathway; Toxoplasmosis; Epstein-Barr virus infection; Chemokine signaling pathway; S | 94.9  | 109.7 | 110.5 | 100.2 | 106.2 | 101.7 | 100.3 | 104.9 |
| 9789873   | Metap2  | 478  | 52.9  |                                                                                                                                                                                                                                                                 | 105.9 | 102.3 | 105.4 | 104.4 | 98.8  | 94.9  | 89.9  | 95.9  |
| 21312938  | Mettl16 | 553  | 62.3  |                                                                                                                                                                                                                                                                 | 93.1  | 94.9  | 94    | 96.6  | 104.1 | 107.7 | 107.3 | 102.7 |

|           |                            |      |       |                                                                                                                                                                                                                                                                                                                                                                                                                                                             |       |       |       |       |       |       |       |       |
|-----------|----------------------------|------|-------|-------------------------------------------------------------------------------------------------------------------------------------------------------------------------------------------------------------------------------------------------------------------------------------------------------------------------------------------------------------------------------------------------------------------------------------------------------------|-------|-------|-------|-------|-------|-------|-------|-------|
| 6753364   | Cdc42                      | 191  | 21.2  | Leukocyte transendothelial migration; AGE-RAGE signaling pathway in diabetic complications; Endocytosis; T cell receptor signaling pathway; Regulation of actin cytoskeleton; MAPK signaling pathway; Ras signaling pathway; VEGF signaling pathway; Focal adhesion pathway; PPAR signaling pathway; Fatty acid metabolism; Fatty acid degradation; Insulin resistance; Adipocytokine signaling pathway; AMPK signaling pathway; Glucagon signaling pathway | 114.2 | 110.3 | 106.3 | 103.5 | 83.8  | 84.8  | 93.4  | 95.1  |
| 162287142 | Cpt1a                      | 773  | 88.2  | PPAR signaling pathway; Fatty acid metabolism; Fatty acid degradation; Insulin resistance; Adipocytokine signaling pathway; AMPK signaling pathway; Glucagon signaling pathway                                                                                                                                                                                                                                                                              | 112   | 110   | 105   | 105.3 | 92.1  | 91.3  | 92.3  | 93.9  |
| 262231769 | Rbmx                       | 391  | 42.3  | Spliceosome                                                                                                                                                                                                                                                                                                                                                                                                                                                 | 123   | 122.5 | 120.3 | 123.5 | 72.9  | 78.2  | 89.8  | 89.3  |
| 6680618   | Acadm                      | 421  | 46.5  | PPAR signaling pathway; Fatty acid metabolism; Valine, leucine and isoleucine degradation; Metabolic pathways; Fatty acid degradation; beta-Alanine metabolism; Propanoate metabolism; Carbon metabolism                                                                                                                                                                                                                                                    | 112.9 | 111.9 | 107.4 | 106.6 | 92.6  | 92.9  | 90.6  | 92.2  |
| 145966883 | Psm14                      | 310  | 34.6  | Proteasome; Epstein-Barr virus infection                                                                                                                                                                                                                                                                                                                                                                                                                    | 86.5  | 85.1  | 85.5  | 84.1  | 109.7 | 105.1 | 111.7 | 114.1 |
| 18252790  | Wdr5                       | 334  | 36.6  |                                                                                                                                                                                                                                                                                                                                                                                                                                                             | 96.3  | 96.4  | 115.9 | 109.2 | 98.6  | 102.9 | 88.2  | 92.5  |
| 6755763   | Alyref                     | 255  | 26.9  | mRNA surveillance pathway; Herpes simplex infection; Spliceosome; RNA transport                                                                                                                                                                                                                                                                                                                                                                             | 126.8 | 124.6 | 120.3 | 121.1 | 77.8  | 77.7  | 54.5  | 52    |
| 219276601 | Nars                       | 559  | 64.2  | Aminoacyl-tRNA biosynthesis                                                                                                                                                                                                                                                                                                                                                                                                                                 | 72    | 71.2  | 73.7  | 70.9  | 123.7 | 139.2 | 138.6 | 114.3 |
| 334358907 | Trnt1                      | 434  | 49.9  | RNA transport                                                                                                                                                                                                                                                                                                                                                                                                                                               | 113.6 | 112.8 | 110.6 | 112   | 85.7  | 87    | 87.7  | 88.3  |
| 6677819   | Rras                       | 218  | 23.7  | Phospholipase D signaling pathway; Regulation of actin cytoskeleton; MAPK signaling pathway; Ras signaling pathway; Axon guidance; HTLV-I infection; Proteoglycans in cancer; Rap1 signaling pathway; cAMP signaling pathway; Tight junction                                                                                                                                                                                                                | 104.8 | 112   | 105.4 | 97.8  | 97.7  | 108.5 | 96.8  | 89.8  |
| 39930413  | Nup98                      | 1187 | 124.7 |                                                                                                                                                                                                                                                                                                                                                                                                                                                             | 96.3  | 90.9  | 97.4  | 93    | 101   | 100   | 109.7 | 111   |
| 157951598 | Capn2                      | 700  | 79.8  | Focal adhesion; Alzheimer's disease; Protein processing in endoplasmic reticulum; Apoptosis                                                                                                                                                                                                                                                                                                                                                                 | 112.6 | 110   | 110.5 | 109.1 | 87.7  | 88    | 73.4  | 77.9  |
| 255003735 | Rpl10a;<br>Rpl10a-         | 217  | 24.8  | Ribosome                                                                                                                                                                                                                                                                                                                                                                                                                                                    | 87.6  | 85.9  | 91    | 93.6  | 102.6 | 100.9 | 116.5 | 114.2 |
| 27369816  | Engase                     | 734  | 82.9  | Other glycan degradation                                                                                                                                                                                                                                                                                                                                                                                                                                    | 103.3 | 108.2 | 106.9 | 103.5 | 110.4 | 116.8 | 89.3  | 90.6  |
| 6678185   | Surf6                      | 355  | 41.2  |                                                                                                                                                                                                                                                                                                                                                                                                                                                             | 101.1 | 100.6 | 104.9 | 102.1 | 90.9  | 89.4  | 107   | 111.7 |
| 169646352 | 2610027L<br>16Rik;<br>Non9 | 636  | 70    |                                                                                                                                                                                                                                                                                                                                                                                                                                                             | 96    | 99.7  | 96    | 92.1  | 108.1 | 105.5 | 109.7 | 109.5 |
| 27734154  | Rab8b                      | 207  | 23.6  |                                                                                                                                                                                                                                                                                                                                                                                                                                                             | 77.8  | 92.8  | 79.3  | 84    | 123.2 | 118.3 | 120.9 | 112.7 |
| 6679337   | Pitpna                     | 271  | 31.9  |                                                                                                                                                                                                                                                                                                                                                                                                                                                             | 116.4 | 116.8 | 125.6 | 126   | 73.5  | 72.6  | 82.9  | 83.7  |
| 226531119 | Lgals9                     | 353  | 40    |                                                                                                                                                                                                                                                                                                                                                                                                                                                             | 124.3 | 126.4 | 112   | 115.5 | 76    | 80.7  | 76.2  | 76.3  |
| 6679082   | Nmt1                       | 496  | 56.9  |                                                                                                                                                                                                                                                                                                                                                                                                                                                             | 90.5  | 93.2  | 94.9  | 92.3  | 111.4 | 107.9 | 103   | 104.1 |
| 31560247  | Tpd52l2                    | 220  | 24    |                                                                                                                                                                                                                                                                                                                                                                                                                                                             | 106.3 | 99.3  | 94.8  | 94.8  | 106.4 | 107.3 | 120.1 | 113.9 |
| 163310765 | Alb                        | 608  | 68.6  | Thyroid hormone synthesis                                                                                                                                                                                                                                                                                                                                                                                                                                   | 188.8 | 209.9 | 173.5 | 186.6 | 42.9  | 42.4  | 47.8  | 43.8  |
| 50838806  | Eif4g3                     | 1578 | 174.6 | Viral myocarditis; RNA transport                                                                                                                                                                                                                                                                                                                                                                                                                            | 107.4 |       | 102.8 |       | 100.4 |       | 100.7 |       |
| 7657583   | Slc25a13                   | 676  | 74.4  |                                                                                                                                                                                                                                                                                                                                                                                                                                                             | 87.2  | 95.1  | 79.9  | 81.8  | 122.6 | 125.3 | 128.1 | 114.7 |

|           |                   |      |       |                                                                                                                            |       |       |       |       |       |       |       |       |
|-----------|-------------------|------|-------|----------------------------------------------------------------------------------------------------------------------------|-------|-------|-------|-------|-------|-------|-------|-------|
| 240120093 | Gnl2              | 728  | 83.3  | Ribosome biogenesis in eukaryotes                                                                                          | 89.5  | 89.7  | 90.1  | 88    | 113.6 | 110.8 | 111.3 | 111.9 |
| 84794552  | Pebp1             | 187  | 20.8  |                                                                                                                            | 122.2 | 140.4 | 109.9 | 110.3 | 80    | 74.5  | 81.4  | 75.7  |
| 156627553 | Nt5c3b;<br>Nt5c3l | 300  | 34.4  | Metabolic pathways; Nicotinate and nicotinamide metabolism; Purine metabolism; Pyrimidine metabolism                       | 103.1 | 104.7 | 102.2 | 97.5  | 92.9  | 96.4  | 97.6  | 94.9  |
| 309263233 | Gm3362            | 156  | 17.7  |                                                                                                                            | 82.8  | 82.3  | 90.8  | 85.7  | 106.8 | 102.9 | 113.8 | 123.5 |
| 358030297 | Kcnab2            | 367  | 41    |                                                                                                                            | 101.5 | 102.3 | 106   | 105.1 | 92.7  | 89.8  | 87.9  | 90    |
| 17505208  | Cd2bp2            | 342  | 37.7  |                                                                                                                            | 99.1  | 96.8  | 99.2  | 102.8 | 109.1 | 110.5 | 105.6 | 108.5 |
| 225543103 | Aldh4a1           | 562  | 61.8  | Arginine and proline metabolism; Metabolic pathways; Alanine, aspartate and glutamate metabolism                           | 108.1 | 116.3 | 124.4 | 125   | 87.8  | 84.6  | 82.9  | 81.9  |
| 101944153 | Map4k1            | 827  | 91.5  | MAPK signaling pathway                                                                                                     | 104.1 | 108.1 | 101.9 | 101.7 | 101   | 99.4  | 95.2  | 95.5  |
| 21704144  | Mat2a             | 395  | 43.7  | Metabolic pathways; Biosynthesis of amino acids; Cysteine and methionine metabolism                                        | 100.8 | 89.4  | 90.7  | 90.7  | 114.3 | 116.3 | 99    | 100.5 |
| 145046259 | Pak1ip1           | 382  | 42.1  |                                                                                                                            | 84.8  | 85.9  | 92.4  | 94.5  | 106.7 | 114.9 | 112.3 | 116.6 |
| 31981577  | Pfdn2             | 154  | 16.5  |                                                                                                                            | 98.6  | 96.3  | 92.8  | 93.5  | 110.1 | 105.7 | 120.9 | 120.4 |
| 109627648 | Mcm3ap            | 1971 | 217.2 |                                                                                                                            | 100.4 | 102.2 | 94.8  | 96.3  | 98.8  | 101.2 | 102.1 | 99.9  |
| 189181668 | Actl6a            | 429  | 47.4  |                                                                                                                            | 105.6 | 105.1 | 103.8 | 101.3 | 94.7  | 95.7  | 91.4  | 90.4  |
| 312222784 | Vdac3             | 284  | 30.9  |                                                                                                                            | 94.3  | 97.2  | 97.3  | 97.3  | 107.7 | 103.8 | 97.5  | 99.1  |
| 30794138  | Ppm1              | 386  | 42.2  |                                                                                                                            | 97.5  | 98.7  | 97.5  | 96.8  | 96.6  | 94.9  | 109.2 | 111.3 |
| 160707945 | Sfl               | 548  | 59.7  |                                                                                                                            | 101   | 100.5 | 95.7  | 98.1  | 100.9 | 100.2 | 106.4 | 106.6 |
| 8392847   | Actr1a            | 376  | 42.6  |                                                                                                                            | 104.8 | 102.6 | 95.2  | 94.4  | 105   | 107.9 | 93    | 97.3  |
| 45476577  | Kif11             | 1052 | 118   |                                                                                                                            | 68.9  | 64    | 63.1  | 56.5  | 146.3 | 152.2 | 157.2 | 162.4 |
| 23956110  | Snrpb2            | 225  | 25.3  | Spliceosome                                                                                                                | 101.6 | 104.8 | 96.7  | 97.2  | 102.1 | 100.9 | 92.7  | 91    |
| 17933768  | Grhpr             | 328  | 35.3  | Pyruvate metabolism; Metabolic pathways; Glycine, serine and threonine metabolism; Glyoxylate and dicarboxylate metabolism | 106.2 | 104.8 | 105.5 | 106   | 95.5  | 92.4  | 92.5  | 92.7  |
| 22128625  | Mrpl37            | 423  | 48.3  |                                                                                                                            | 96.1  | 97.4  | 95.2  | 98.2  | 118.6 | 108.8 | 103.4 | 104.9 |
| 6678137   | Srprb             | 269  | 29.6  | Protein export                                                                                                             | 88.4  | 83.3  | 82.8  | 81.2  | 114.4 | 119   | 122.8 | 121.7 |
| 6677801   | Rps17             | 135  | 15.5  | Ribosome                                                                                                                   | 68.3  | 67    | 100.3 | 105   | 133.1 | 133.9 | 105.9 | 104.9 |
| 189458793 | Cep110;<br>Cntrl  | 2333 | 268.6 |                                                                                                                            | 118.9 | 113.3 | 107   | 102.1 | 88.8  | 90.3  | 96.8  | 92    |
| 30794150  | Man2c1            | 1039 | 115.6 | Other glycan degradation                                                                                                   | 106.3 | 112   | 95    | 99    | 100.3 | 99.2  | 95.3  | 97.8  |
| 49169845  | Nipbl             | 2798 | 315.3 |                                                                                                                            | 103.2 | 98.8  | 95.2  | 92.7  | 95.5  | 100.1 | 105.9 | 107.6 |
| 19072792  | Erp44             | 406  | 46.8  |                                                                                                                            | 90.5  | 95.2  | 91.4  | 87.6  | 107   | 101.1 | 98.6  | 106.6 |
| 132626693 | Mdc1              | 1708 | 184.7 |                                                                                                                            | 96.9  | 100.7 | 93.4  | 98.6  | 100.1 | 100.7 | 103.2 | 111   |
| 226958354 | Ppm1b             | 477  | 52.1  |                                                                                                                            | 100.9 | 105.6 | 114.4 | 108   | 98.5  | 94    | 94.5  | 98.2  |
| 70780375  | Arhgap15          | 481  | 55.3  |                                                                                                                            | 107   | 107.1 | 110.4 | 113.8 | 80.4  | 77.9  | 86.8  | 83.8  |
| 120444918 | Rasa3             | 834  | 95.9  | Ras signaling pathway                                                                                                      | 108.6 | 114.7 | 115.8 | 110.8 | 93.3  | 88.3  | 80    | 84.5  |
| 294997326 | Fnbp1             | 551  | 64.2  |                                                                                                                            | 105.4 | 104.9 | 103.2 | 101.2 | 84.9  | 84.8  | 89.3  | 80.8  |
| 9910550   | Sec11a            | 179  | 20.6  | Protein export                                                                                                             | 98    | 96.5  | 101.3 | 103   | 105.4 | 106.6 | 97.4  | 94.7  |
| 62909983  | Cpsf6             | 551  | 59.1  | mRNA surveillance pathway                                                                                                  | 112.9 | 110.7 | 100.7 | 103.4 | 95    | 95.8  | 88.8  | 98.4  |

|           |                                 |      |       |                                                                                                                                                                                                         |       |       |       |       |       |       |       |       |
|-----------|---------------------------------|------|-------|---------------------------------------------------------------------------------------------------------------------------------------------------------------------------------------------------------|-------|-------|-------|-------|-------|-------|-------|-------|
| 21314854  | Gatad2b                         | 594  | 65.4  |                                                                                                                                                                                                         | 105.2 | 100.5 | 94.7  | 93.8  | 99.3  | 103.8 | 106.3 | 103.8 |
| 6680345   | Idh3g                           | 393  | 42.8  | Citrate cycle (TCA cycle); Metabolic pathways;<br>Biosynthesis of amino acids; 2-Oxocarboxylic acid<br>metabolism; Carbon metabolism                                                                    | 110.9 | 107.5 | 108.9 | 107.4 | 95    | 96.2  | 87.1  | 91.4  |
| 37700232  | Nme1                            | 152  | 17.2  | Metabolic pathways; Purine metabolism; Pyrimidine<br>metabolism                                                                                                                                         | 90.8  | 89.4  | 89.8  | 95.5  | 104.1 | 103.1 | 119.1 | 116.9 |
| 13384918  | Parp9                           | 830  | 92.6  |                                                                                                                                                                                                         | 106.5 | 104.7 | 100.5 | 101.5 | 100   | 104.5 | 98.6  | 98.7  |
| 163937858 | Rbbp6                           | 1790 | 199.5 |                                                                                                                                                                                                         | 110.1 | 107.8 | 99.4  | 101   | 105.7 | 100.7 | 96.5  | 101.2 |
| 27229082  | Lzic                            | 190  | 21.5  |                                                                                                                                                                                                         | 116.8 | 118.2 | 106.4 | 108   | 82.3  | 81.9  | 103.8 | 101.4 |
| 84781781  | Pdap1                           | 181  | 20.6  |                                                                                                                                                                                                         | 100.3 | 102.8 | 100.6 | 99.3  | 98.1  | 97.6  | 129.8 | 128.7 |
| 27369569  | Smndc1                          | 238  | 26.7  | Spliceosome                                                                                                                                                                                             | 100.2 | 103.3 | 100.2 | 95.1  | 94.1  | 97.2  | 109.3 | 108.2 |
| 21313668  | Apmap                           | 415  | 46.4  |                                                                                                                                                                                                         | 101.4 | 100   | 101.7 | 100.7 | 91.9  | 93    | 94.4  | 93.5  |
| 19526986  | Asl                             | 464  | 51.7  | Metabolic pathways; Biosynthesis of amino acids; Alanine,<br>aspartate and glutamate metabolism; Arginine biosynthesis                                                                                  | 97.9  | 88.4  | 98.3  | 99.3  | 94.3  | 102.5 | 101.1 | 108.7 |
| 13654268  | Tsta3                           | 321  | 35.9  | Metabolic pathways; Amino sugar and nucleotide sugar<br>metabolism; Fructose and mannose metabolism                                                                                                     | 102.2 | 99.8  | 101.7 | 99.5  | 100.5 | 99.8  | 91.8  | 90.2  |
| 149269638 | Nutf2;<br>Gm10349;<br>Nutf2-ps2 | 127  | 14.5  |                                                                                                                                                                                                         | 115.1 | 120.2 | 137.3 | 104.9 | 81.1  | 77.2  | 43.6  | 91.8  |
| 124487201 | 130000110<br>1Rik;              | 1353 | 151.7 |                                                                                                                                                                                                         | 75.3  | 74.2  | 74.3  | 78.9  | 142.9 | 136.1 | 135.3 | 147.4 |
| 70778826  | Vcpip1                          | 1220 | 134.4 |                                                                                                                                                                                                         | 97    | 102.8 | 98.6  | 109.3 | 98.3  | 101.3 | 101.1 | 94.4  |
| 83523742  | Wdr75                           | 830  | 94    | Ribosome biogenesis in eukaryotes                                                                                                                                                                       | 86.1  | 93.1  | 80.3  | 78.7  | 117.7 | 125.6 | 131.7 | 119.8 |
| 22122499  | Scrn2                           | 425  | 46.6  |                                                                                                                                                                                                         | 106.5 | 106.2 | 91.7  | 93.7  | 97.6  | 94.8  | 99.3  | 92.8  |
| 18250296  | Rpl24                           | 157  | 17.8  | Ribosome                                                                                                                                                                                                | 90.8  | 89.7  | 84.1  | 83.1  | 100.2 | 102.3 | 123.6 | 125.2 |
| 224994233 | Kdmla                           | 853  | 92.8  |                                                                                                                                                                                                         | 106.8 | 100.3 | 98.6  | 93    | 101.4 | 91.9  | 99.9  | 98    |
| 8567340   | Copg2                           | 871  | 97.6  |                                                                                                                                                                                                         | 97.6  | 89.9  | 94.5  | 92.3  | 102.9 | 101.8 | 97.9  | 106.7 |
| 12963643  | Mrpl46                          | 283  | 32.1  |                                                                                                                                                                                                         | 90.9  | 92.6  | 89.9  | 88.7  | 118.8 | 112.2 | 118.6 | 122.6 |
| 22122701  | Lrch4                           | 680  | 73.1  |                                                                                                                                                                                                         | 109   | 105.4 | 116.2 | 121.1 | 94.5  | 96    | 94    | 98.2  |
| 7304953   | Cd4                             | 457  | 51.3  | T cell receptor signaling pathway; Primary<br>immunodeficiency; Cell adhesion molecules (CAMs);<br>Antigen processing and presentation; Hematopoietic cell<br>lineage: Th1 and Th2 cell differentiation | 82.2  | 84.1  | 85.1  | 95.9  | 95    | 99    | 99.9  | 98.7  |
| 90093351  | Arhgap9                         | 473  | 53.1  |                                                                                                                                                                                                         | 110.2 | 111.7 | 113.2 | 102.4 | 95.5  | 88.5  | 79.2  | 82.7  |
| 255069728 | Tapbpl                          | 451  | 48.7  |                                                                                                                                                                                                         | 99.8  | 99    | 101.3 | 99.8  | 105.2 | 105.5 | 106.2 | 107.9 |
| 23956104  | Ak3                             | 227  | 25.4  | Purine metabolism                                                                                                                                                                                       | 111.4 | 111.6 | 112.9 | 114.9 | 94.8  | 89.4  | 95.7  | 92.8  |
| 19745150  | Cyb5r3                          | 301  | 34.1  | Amino sugar and nucleotide sugar metabolism                                                                                                                                                             | 97.2  | 102.7 | 101.9 | 98.9  | 107.2 | 100.7 | 92.6  | 98.2  |
| 13195604  | Rps23                           | 143  | 15.8  | Ribosome                                                                                                                                                                                                | 86.3  | 90.2  | 95.9  | 95    | 125.9 | 126.1 | 82.7  | 82.7  |
| 27804323  | Sely                            | 432  | 47.2  | Metabolic pathways; Selenocompound metabolism                                                                                                                                                           | 114.4 | 112.4 | 114.2 | 116.9 | 91.6  | 91.2  | 91    | 87.9  |
| 31543047  | Kpna1                           | 538  | 60.1  | Influenza A                                                                                                                                                                                             | 97.5  | 93.6  | 93    | 102   | 103.8 | 107.3 | 100.7 | 101.1 |
| 37674218  | Exoc8                           | 716  | 81    |                                                                                                                                                                                                         | 109.7 | 103.4 | 91.9  | 93.1  | 106.6 | 120.9 | 96.5  | 100.6 |



|           |                                         |      |       |                                                                                                         |       |       |       |       |       |       |       |       |
|-----------|-----------------------------------------|------|-------|---------------------------------------------------------------------------------------------------------|-------|-------|-------|-------|-------|-------|-------|-------|
| 30231213  | Inpp5b                                  | 993  | 112.7 | Metabolic pathways; Inositol phosphate metabolism; Phosphatidylinositol signaling system                | 109.1 | 106.7 | 105.2 | 100.1 | 86.1  | 89.1  | 89.9  | 97.8  |
| 170650637 | Gbp6                                    | 611  | 70.4  |                                                                                                         | 91.6  | 89.8  | 96.9  | 94.2  | 109.6 | 109.5 | 113.1 | 118   |
| 22122591  | Ubxn1                                   | 297  | 33.6  |                                                                                                         | 97.6  | 99.6  | 95.5  | 96.6  | 108.5 | 108.3 | 108.2 | 107.8 |
| 254588131 | Nfatc2ip                                | 412  | 45.1  |                                                                                                         | 103.7 | 115.1 | 118.7 | 113.5 | 83.2  | 83.3  | 100.3 | 95.4  |
| 165932356 | Sirt7                                   | 402  | 45.1  |                                                                                                         | 123.1 | 127.8 | 110.9 | 116.3 | 90.8  | 82.7  | 88.2  | 73    |
| 93102413  | Galk1                                   | 392  | 42.3  | Metabolic pathways; Amino sugar and nucleotide sugar metabolism; Galactose metabolism                   | 99.2  | 94.9  | 81.1  | 79.7  | 110.2 | 114.6 | 110.5 | 109.5 |
| 27229036  | Srpr                                    | 636  | 69.6  | Protein export                                                                                          | 84.2  | 83.4  | 80.3  | 74.3  | 120.5 | 128.5 | 119.5 | 120.7 |
| 19527306  | Adk                                     | 361  | 40.1  | Metabolic pathways; Purine metabolism                                                                   | 115.3 |       | 108.4 |       | 95.7  |       | 99.2  |       |
| 9055200   | Crlf3                                   | 442  | 49.5  |                                                                                                         | 100.2 | 99.9  | 115.3 | 114.1 | 91.1  | 91.4  | 87.4  | 92    |
| 77627973  | Mettl3                                  | 580  | 64.6  |                                                                                                         | 100   | 93.8  | 93.9  | 92.5  | 148.4 | 156.3 | 92.8  | 88.4  |
| 62079289  | Acap2                                   | 770  | 87.2  | Endocytosis                                                                                             | 102.8 | 104.8 | 99.4  | 106.7 | 95.9  | 92.3  | 96.9  | 106.6 |
| 13385680  | Decr1                                   | 335  | 36.2  |                                                                                                         | 99.1  | 97.7  | 93.6  | 93.2  | 111.9 | 108.1 | 102.5 | 104.9 |
| 31982030  | Arhgdia                                 | 204  | 23.4  | Neurotrophin signaling pathway; Vasopressin-regulated water reabsorption                                | 121.2 | 119   | 125.7 | 129.5 | 70.7  | 71.6  | 87.1  | 85.5  |
| 27370012  | Zmpste24                                | 475  | 54.7  | Terpenoid backbone biosynthesis                                                                         | 94.5  | 94.7  | 92.5  | 92.7  | 107.9 | 104.9 | 101.1 | 101.1 |
| 498752597 | Hbb-b1;<br>Beta-s;<br>Hbb-bs;<br>Hbb-bt | 147  | 15.8  | African trypanosomiasis; Malaria                                                                        | 84.9  | 86.1  | 389.7 | 396.7 | 47    | 48.5  | 66.3  | 60.2  |
| 61656180  | Utp18                                   | 552  | 61.2  | Ribosome biogenesis in eukaryotes                                                                       | 99.9  | 98.9  | 81.8  | 84.2  | 114.4 | 108.3 | 116.3 | 114.1 |
| 23956078  | Abcf2                                   | 628  | 71.7  |                                                                                                         | 78.9  | 84.5  | 77.5  | 80.2  | 122.5 | 121.3 | 129.7 | 123.8 |
| 312176401 | Itsn2                                   | 1685 | 191.6 |                                                                                                         | 106.8 | 108   | 103   | 96.3  | 95.4  | 93.5  | 96.7  | 101.1 |
| 22779895  | Slc44a2                                 | 706  | 80.1  | Choline metabolism in cancer                                                                            | 109.2 | 106.4 | 107.5 | 100.6 | 97.6  | 96.3  | 84    | 94.6  |
| 28076897  | Cdipt                                   | 213  | 23.6  | Metabolic pathways; Glycerophospholipid metabolism; Inositol phosphate metabolism; Phosphatidylinositol | 100.6 | 116.5 | 109.9 | 109.2 | 108.9 | 95.9  | 86.9  | 90.9  |
| 114158677 | Luc7l                                   | 371  | 43.9  |                                                                                                         | 113.5 | 110.6 | 108   | 106.2 | 100.4 | 94    | 103.1 | 88.9  |
| 13384876  | 1810009A<br>15Rik;<br>LOC1052<br>42733  | 123  | 14.1  |                                                                                                         | 112   | 105.7 | 110.7 | 110.1 | 89.6  | 84.2  | 111.5 | 130.7 |
| 22003860  | Cd3eap                                  | 399  | 43.1  |                                                                                                         | 93.5  | 98.4  | 102.3 | 86.9  | 109.7 | 107.4 | 112.2 | 110.2 |
| 6753618   | Ddt                                     | 118  | 13.1  |                                                                                                         | 104   | 108.6 | 107.3 | 106.4 | 98.4  | 94.5  | 110.4 | 109.3 |
| 51243034  | Osbpl8                                  | 889  | 101.2 |                                                                                                         | 94.9  | 107   | 88.9  | 88.4  | 111.5 | 108.7 | 95.9  | 102   |
| 188528613 | Gmfb                                    | 142  | 16.7  |                                                                                                         | 120.2 | 118.2 | 122.9 | 122.4 | 86.1  | 80.2  | 73.5  | 68.3  |
| 162287296 | Rbm8a                                   | 174  | 19.9  | mRNA surveillance pathway; Spliceosome; RNA transport                                                   | 102.8 | 98.4  | 105.4 | 100.2 | 88.5  | 94.1  | 77.5  | 89.5  |
| 46250738  | H2afy2                                  | 372  | 40.1  | Alcoholism; Systemic lupus erythematosus                                                                | 98.3  | 91.3  | 144.4 | 139.2 | 105.1 | 109   | 34.9  | 41.3  |
| 21704124  | Rbm10                                   | 930  | 103.4 |                                                                                                         | 99.8  | 92.8  | 95.2  | 98.1  | 99.1  | 102.2 | 99    | 104.8 |
| 10048438  | Xpo4                                    | 1151 | 129.9 |                                                                                                         | 90.5  | 98.3  | 89.8  | 88.4  | 110.7 | 108.7 | 112.8 | 106.1 |
| 82994207  | Gm5093                                  | 198  | 22.7  |                                                                                                         | 82.5  | 78.6  | 83.5  | 84.1  | 110.7 | 110.1 | 119.9 | 118.9 |

|           |                                         |      |       |                                                                                                         |       |       |       |       |       |       |       |       |
|-----------|-----------------------------------------|------|-------|---------------------------------------------------------------------------------------------------------|-------|-------|-------|-------|-------|-------|-------|-------|
| 6680201   | Hdgfrp2;<br>Hdgfl2                      | 669  | 74.2  |                                                                                                         | 97.5  | 104   | 96.7  | 99    | 106.6 | 99.3  | 88.3  | 90.5  |
| 190684669 | Epb4.1;<br>Epb41                        | 858  | 95.9  | Tight junction                                                                                          | 104.3 | 97.2  | 99.4  | 89.1  | 99.1  | 100.1 | 103.8 | 84.3  |
| 119672912 | Cherp                                   | 938  | 106.3 | Spliceosome                                                                                             | 100.1 | 94.4  | 101.1 | 101.9 | 101.2 | 108.8 | 87.1  | 96.2  |
| 91199557  | Atad2                                   | 1364 | 155.2 |                                                                                                         | 78.9  | 87.8  | 81    | 88    | 135   | 117.9 | 116.9 | 116.1 |
| 27229061  | Wdr55                                   | 388  | 42.6  |                                                                                                         | 104.3 | 105.4 | 99.3  | 104.1 | 107.6 | 103.6 | 92.3  | 83    |
| 459683845 | Rpl22                                   | 151  | 17.6  |                                                                                                         | 82.1  | 88.8  | 97.5  | 94.3  | 115.1 | 109.8 | 116.1 | 115.4 |
| 224922828 | Rbm42                                   | 478  | 50.2  |                                                                                                         | 110.9 | 107.5 | 112.8 | 101.2 | 91.7  | 90.2  | 96    | 98.7  |
| 75677510  | Gtf3c3                                  | 882  | 100.6 |                                                                                                         | 108.1 | 91.9  | 97.7  | 99    | 112.5 | 109.6 | 104.5 | 101.5 |
| 31560394  | Akap8                                   | 687  | 76.2  |                                                                                                         | 101.1 | 104.9 | 105.7 | 106   | 91.8  | 90.8  | 94    | 90.7  |
| 13384758  | Necap2                                  | 266  | 28.6  |                                                                                                         | 107.7 | 111.4 | 114.5 | 112.8 | 97.7  | 89.5  | 92.4  | 93.3  |
| 110625719 | Hint2                                   | 163  | 17.3  |                                                                                                         | 121.7 | 122.2 | 125   | 124.7 | 77.5  | 80.4  | 85.8  | 83.3  |
| 119360354 | Nub1                                    | 614  | 70.3  |                                                                                                         | 109.3 | 119   | 85.6  | 86.6  | 91    | 88.4  | 108.5 | 103.4 |
| 6753556   | Ctsd                                    | 410  | 44.9  | Tuberculosis; Lysosome; Sphingolipid signaling pathway;<br>Apoptosis                                    | 149.2 | 139.2 | 128.9 | 123.6 | 80.6  | 83.9  | 83.8  | 89.8  |
| 21362285  | Wdr33                                   | 1330 | 145.2 | mRNA surveillance pathway                                                                               | 92.9  | 92.7  | 96.5  | 96.6  | 109.3 | 108.4 | 112   | 109.6 |
| 6678101   | Serpinb9                                | 374  | 42.2  | Amoebiasis                                                                                              | 118.9 | 114.4 | 109.3 | 109.8 | 99.1  | 100.8 | 100   | 98.5  |
| 21312752  | Mrrf                                    | 262  | 29    |                                                                                                         | 105.4 | 111.1 | 101.6 | 97.1  | 101.7 | 99.6  | 110.5 | 110.3 |
| 18034773  | Acss1                                   | 682  | 74.6  | Pyruvate metabolism; Metabolic pathways; Glycolysis /<br>Gluconeogenesis; Propanoate metabolism; Carbon | 122.5 | 117.4 | 113.1 | 110.3 | 84.4  | 92.8  | 85.5  | 83.8  |
| 71725387  | Inpp4b                                  | 924  | 104.5 | Metabolic pathways; Inositol phosphate metabolism;<br>Phosphatidylinositol signaling system             | 94.1  | 100.3 | 90.6  | 102.1 | 105.3 | 104.6 | 110.9 | 105.9 |
| 21704076  | Gtf2b                                   | 316  | 34.8  | Basal transcription factors; Epstein-Barr virus infection;<br>Viral carcinogenesis                      | 103.3 | 106   | 105.2 | 106.8 | 97.8  | 93.9  | 86.4  | 97.2  |
| 21539639  | 0610037L<br>13Rik                       | 196  | 22    |                                                                                                         | 113   | 118.6 | 114.2 | 115.2 | 84.8  | 79.8  | 75    | 77.7  |
| 31980808  | Eif3g                                   | 320  | 35.6  | RNA transport                                                                                           | 94.9  | 89.7  | 91.3  | 92.6  | 107.7 | 112.2 | 116.1 | 118.3 |
| 124487362 | Arfp1                                   | 373  | 41.5  |                                                                                                         | 93.4  | 95.7  | 94.3  | 94.6  | 101.7 | 103.2 | 113.6 | 119.6 |
| 254553412 | C130039O<br>16Rik;<br>Elmsan1           | 1089 | 119.6 |                                                                                                         | 110.1 | 105.5 | 99.2  | 97.3  | 100.8 | 104.1 | 100.5 | 104.6 |
| 163310776 | Ap3b1                                   | 1105 | 122.7 | Lysosome                                                                                                | 97.5  | 103.9 | 99    | 103.2 | 97.2  | 97.4  | 101.8 | 91.8  |
| 29789209  | Raver1;<br>Raver1-<br>fdx11;<br>Gm38431 | 748  | 79.3  |                                                                                                         | 102.7 | 102.5 | 99.2  | 102.4 | 89.2  | 88    | 100.7 | 96.7  |
| 108773813 | Nup85                                   | 656  | 74.7  | RNA transport                                                                                           | 99.9  | 92.3  | 90.4  | 92.1  | 114.9 | 109.9 | 98.3  | 96.4  |
| 170014725 | Bdh1                                    | 343  | 38.3  | Metabolic pathways; Butanoate metabolism; Synthesis and<br>degradation of ketone bodies                 | 108.1 | 109.3 | 101.4 | 100   | 91    | 95.2  | 87    | 81.4  |
| 124487105 | Arid4a                                  | 1261 | 142   |                                                                                                         | 104.5 | 102.2 | 104.8 | 107.3 | 99.9  | 94.7  | 98.2  | 90    |
| 23956266  | Dnajc9                                  | 259  | 30    |                                                                                                         | 111.7 | 112.1 | 114.5 | 114.1 | 83.4  | 84.5  | 88.7  | 86.6  |
| 31542413  | Coro1c                                  | 474  | 53.1  |                                                                                                         | 109.9 | 103.4 | 96.4  | 95    | 93.1  | 92.5  | 83.9  | 90.9  |

|           |                          |      |       |                                                                                                                                                         |       |       |       |       |       |       |       |       |
|-----------|--------------------------|------|-------|---------------------------------------------------------------------------------------------------------------------------------------------------------|-------|-------|-------|-------|-------|-------|-------|-------|
| 226958385 | Ddx24                    | 903  | 101.3 |                                                                                                                                                         | 95.5  | 95.8  | 113.3 | 112.6 | 111.7 | 113.4 | 89    | 93.9  |
| 124487354 | Taf4a;<br>Taf4           | 1042 | 105.2 | Herpes simplex infection; Basal transcription factors;<br>Huntington's disease                                                                          | 109.2 | 106.4 | 99.6  | 104.5 | 97.6  | 94.5  | 91    | 90.7  |
| 54607114  | ErbB2ip;<br>Erbin        | 1450 | 162.1 |                                                                                                                                                         | 93.5  | 85.9  | 93.1  | 88.3  | 102.4 | 99.2  | 99.8  | 100.5 |
| 110347519 | Rpf2                     | 306  | 35.3  |                                                                                                                                                         | 81.7  | 74    | 90.6  | 82.3  | 121.5 | 129.8 | 121   | 129.5 |
| 254540162 | Pcca                     | 724  | 79.9  | Valine, leucine and isoleucine degradation; Metabolic<br>pathways; Propanoate metabolism; Carbon metabolism;<br>Glyoxylate and dicarboxylate metabolism | 101.9 | 105.6 | 104.5 | 105.9 | 101.1 | 101.5 | 96.3  | 96.2  |
| 158517895 | Ttc38                    | 465  | 52.2  |                                                                                                                                                         | 117.9 | 110.9 | 113.9 | 110.9 | 81.1  | 86.8  | 82.9  | 88.6  |
| 6753086   | Apex1                    | 317  | 35.5  | Base excision repair                                                                                                                                    | 121.3 | 124.2 | 139.6 | 141.6 | 80.2  | 79.7  | 84.2  | 87.1  |
| 312283631 | Wnk1                     | 2635 | 279.6 |                                                                                                                                                         | 97.2  | 102.4 | 106.7 | 103.3 | 100.8 | 102.6 | 95.1  | 90.2  |
| 21312626  | Ist1                     | 362  | 39.4  | Endocytosis                                                                                                                                             | 107.2 | 118.4 | 107.4 | 109.9 | 90.6  | 93.7  | 90.6  | 77.4  |
| 13384998  | Fis1                     | 152  | 17    |                                                                                                                                                         | 127.9 | 127.2 | 117   | 117.9 | 70.2  | 74.5  | 76.9  | 84.1  |
| 22122717  | Cnot3                    | 751  | 81.9  | RNA degradation                                                                                                                                         | 107   | 99.1  | 98.3  | 94.2  | 101.7 | 100.6 | 100.7 | 99.9  |
| 46402235  | Gtf3c1                   | 2101 | 237.3 |                                                                                                                                                         | 100.1 | 90.7  | 109.3 | 120.9 | 101.4 | 115.4 | 100   | 98.6  |
| 13384730  | Sarnp;<br>Gm6563         | 210  | 23.5  |                                                                                                                                                         | 112.9 | 116.3 | 120.7 | 120.6 | 79.5  | 78.8  | 88.3  | 89.2  |
| 21313679  | Atp5h                    | 161  | 18.7  | Metabolic pathways; Huntington's disease; Oxidative<br>phosphorylation; Parkinson's disease; Alzheimer's disease                                        | 101.6 | 102.8 | 101.9 | 99.7  | 98.9  | 102.2 | 101.8 | 99.2  |
| 90403601  | Aup1                     | 439  | 49.3  |                                                                                                                                                         | 104.6 | 108.6 | 99.4  | 100   | 102.1 | 102   | 97.1  | 102.5 |
| 269954711 | Ttl12                    | 639  | 74    |                                                                                                                                                         | 110.4 | 104.4 | 106.3 | 104.7 | 94.4  | 100.9 | 85.4  | 93.2  |
| 13385994  | Snrpg                    | 76   | 8.5   | Spliceosome                                                                                                                                             | 111.4 | 109.9 | 107.4 | 105.1 | 113.5 | 108.5 | 68.7  | 68.4  |
| 11875203  | Tpm2                     | 284  | 32.8  | Hypertrophic cardiomyopathy (HCM); Dilated<br>cardiomyopathy; Cardiac muscle contraction; Adrenergic<br>signaling in cardiomyocytes                     | 149.7 | 158.6 | 64.4  | 63.6  | 88.7  | 92.5  | 89.6  | 81.8  |
| 133922578 | Ccdc22                   | 627  | 70.8  |                                                                                                                                                         | 98.8  | 109.5 | 104   | 98.2  | 100.6 | 104.5 | 104.3 | 102   |
| 95113671  | Pmpcb                    | 489  | 54.6  |                                                                                                                                                         | 98.9  | 100.9 | 105.3 | 103   | 99    | 103   | 97.5  | 102.3 |
| 267844902 | D6Wsu11<br>6e;<br>Fam21; | 1334 | 145.2 | Endocytosis                                                                                                                                             | 113   | 115.5 | 102.1 | 107   | 84.4  | 82.4  | 95.2  | 95    |
| 312922373 | Epb4.112;<br>Epb4112     | 988  | 109.9 | Tight junction                                                                                                                                          | 106.3 | 109.9 | 91.7  | 91.8  | 103   | 105.9 | 114.8 | 110.3 |
| 61651675  | Ankrd13a                 | 588  | 67.1  |                                                                                                                                                         | 106.2 | 110.2 | 95.3  | 102   | 94    | 92.5  | 99.5  | 93.1  |
| 164663773 | Rasa1                    | 1038 | 115.4 | MAPK signaling pathway; Ras signaling pathway; Axon<br>guidance                                                                                         | 83    | 83.6  | 82    | 82.5  | 117.2 | 114.7 | 118.4 | 119.3 |
| 7949037   | Ech1                     | 327  | 36.1  | Peroxisome                                                                                                                                              | 101.1 | 103   | 92.6  | 99    | 103.6 | 101.9 | 103   | 102.3 |
| 157951606 | Dnajc8                   | 253  | 29.8  |                                                                                                                                                         | 114.2 | 113.9 | 112.9 | 113.8 | 79.3  | 76.8  | 93.9  | 97.4  |
| 227330590 | Ufl1                     | 793  | 89.5  |                                                                                                                                                         | 104.2 | 105.4 | 96.9  | 95.1  | 96.8  | 93.5  | 95.9  | 108.6 |
| 117606366 | Cmpk2                    | 447  | 50    | Metabolic pathways; Pyrimidine metabolism                                                                                                               | 109.2 | 112.3 | 102.5 | 118.6 | 85.4  | 86.5  | 85.6  | 83.2  |
| 22165392  | Ncapd2                   | 1392 | 155.5 |                                                                                                                                                         | 71.3  | 68.7  | 75.1  | 76.5  | 129   | 144.9 | 131.1 | 133.1 |
| 96975138  | Hprt                     | 218  | 24.6  | Metabolic pathways; Purine metabolism; Drug metabolism<br>- other enzymes                                                                               | 90    | 86.4  | 84.5  | 85.4  | 105.7 | 106.7 | 114.8 | 118.3 |

|           |                                              |      |       |                                                                                                      |       |       |       |       |       |       |       |       |
|-----------|----------------------------------------------|------|-------|------------------------------------------------------------------------------------------------------|-------|-------|-------|-------|-------|-------|-------|-------|
| 256017133 | Ripk3                                        | 486  | 53.3  | TNF signaling pathway; NOD-like receptor signaling pathway; Cytosolic DNA-sensing pathway            | 91.2  | 88.9  | 90    | 98.2  | 110.6 | 118.9 | 103   | 100.8 |
| 71037387  | Ikzf1                                        | 515  | 57.2  |                                                                                                      | 100   | 92.8  | 99.5  | 98.5  | 90.7  | 90.3  | 99.3  | 97.8  |
| 18390323  | Rab14                                        | 215  | 23.9  | AMPK signaling pathway                                                                               | 93.6  | 83.9  | 95.4  | 106.7 | 101.2 | 107.6 | 103.9 | 102.4 |
| 15826844  | Serpinb6b                                    | 377  | 42.5  | Amoebiasis                                                                                           | 108.9 | 104.4 | 102.1 | 96.3  | 103.1 | 100.3 | 92.6  | 102.3 |
| 227116345 | Psmb2                                        | 201  | 22.9  | Proteasome                                                                                           | 89.4  | 87.3  | 110   | 109.9 | 109.2 | 112   | 96.1  | 95.9  |
| 31560618  | Bub3                                         | 326  | 36.9  | HTLV-I infection; Cell cycle                                                                         | 99.6  | 100.9 | 100.8 | 97.7  | 97.8  | 97.4  | 93.4  | 86.5  |
| 122114537 | Vps13c                                       | 3748 | 419.8 |                                                                                                      | 103   | 103.8 | 104.1 | 103.4 | 102.8 | 94.8  | 94.4  | 97.3  |
| 172072627 | Nt5c3                                        | 331  | 37.2  | Metabolic pathways; Nicotinate and nicotinamide metabolism; Purine metabolism; Pyrimidine metabolism | 106.4 | 105.8 | 104.7 | 108.3 | 99.8  | 101.5 | 95.4  | 96.4  |
| 114326528 | Zgpat                                        | 511  | 56.4  |                                                                                                      | 106.1 | 109.5 | 104   | 102.7 | 101.8 | 98.3  | 98.4  | 100.3 |
| 356640155 | Ncor1                                        | 2454 | 270.6 | Transcriptional misregulation in cancer; Thyroid hormone signaling pathway; Endocrine resistance     | 100.2 | 92.6  | 97.2  | 96.5  | 99.7  | 96.7  | 95.5  | 128.6 |
| 6753884   | Fkbp5                                        | 456  | 50.9  | Estrogen signaling pathway                                                                           | 101.5 | 101.6 | 97.7  | 99.3  | 94.7  | 96.5  | 100.4 | 97.3  |
| 242246981 | Nsmce4a                                      | 381  | 43.7  |                                                                                                      | 102.6 | 104.3 | 95.9  | 103.3 | 108.7 | 101.9 | 101.6 | 101.3 |
| 254911014 | Klraql;<br>Ppp1r2l                           | 780  | 88.3  |                                                                                                      | 102.8 | 102.6 | 101.4 | 100.3 | 98.8  | 97.3  | 95.9  | 98.8  |
| 13385020  | 281042811<br>5Rik;<br>Rex1bd                 | 169  | 18.7  |                                                                                                      | 89.7  | 90.1  | 94.1  | 81.5  | 124.8 | 122.8 | 106.7 | 110.7 |
| 6756053   | Zfp259;<br>Zpr1                              | 459  | 50.7  |                                                                                                      | 101.4 | 101.2 | 97.3  | 95.5  | 101.6 | 98.4  | 110.8 | 117.9 |
| 21450271  | Ncoa5                                        | 579  | 65.3  |                                                                                                      | 99.4  | 102.3 | 98.1  | 101.6 | 99.5  | 108.2 | 105.5 | 100.6 |
| 171460910 | U2surp                                       | 1029 | 118.2 | Spliceosome                                                                                          | 97.8  | 96    | 100   | 102.5 | 99.2  | 102   | 102.7 | 97.2  |
| 7305363   | Pafah1b1                                     | 410  | 46.6  | Metabolic pathways; Ether lipid metabolism                                                           | 99.7  | 100.8 | 102.1 | 101.7 | 92    | 95.3  | 100.8 | 98.3  |
| 377833162 | Pnpt1                                        | 783  | 85.6  | RNA degradation; Purine metabolism; Pyrimidine metabolism                                            | 98.9  | 98    | 100.6 | 98.4  | 105.7 | 106.2 | 110.2 | 112.8 |
| 31542488  | Vac14                                        | 782  | 88    | HTLV-I infection; Viral carcinogenesis                                                               | 106.1 | 108.3 | 103.5 | 103.1 | 98.4  | 96.5  | 91.3  | 92    |
| 20070404  | Usp39                                        | 564  | 65.1  | Spliceosome                                                                                          | 106.2 | 93.6  | 96.1  | 94.3  | 98.2  | 93.3  | 98.9  | 106.1 |
| 9789995   | Stmn1                                        | 149  | 17.3  | MAPK signaling pathway; MicroRNAs in cancer                                                          | 62.8  | 61.6  | 60.8  | 58.7  | 149.8 | 143.1 | 168.8 | 170.1 |
| 34368584  | Zc3h15                                       | 426  | 48.3  |                                                                                                      | 90.1  | 87.5  | 87.3  | 87.2  | 114.4 | 115.7 | 103.6 | 113   |
| 170932530 | Tnpo2                                        | 897  | 101.4 |                                                                                                      | 97.9  | 88.6  | 102.1 | 101   | 105.6 | 109   | 100.8 | 102.3 |
| 149267855 | Rps24;<br>LOC6771<br>13;<br>LOC1026<br>42752 | 133  | 15.4  | Ribosome                                                                                             | 83.5  | 80.5  | 85.7  | 85.6  | 113.3 | 111.6 | 126.6 | 126.2 |
| 15277319  | Lztfl1                                       | 299  | 34.8  |                                                                                                      | 105.7 | 97.2  | 110.3 | 108.9 | 101.6 | 97.5  | 106.3 | 107.4 |
| 294862278 | 0610010K<br>14Rik                            | 191  | 20    |                                                                                                      | 105.7 | 94.7  | 107.1 | 105.5 | 98.3  | 104.9 | 98.3  | 101   |
| 10946940  | Rab2a                                        | 212  | 23.5  | AMPK signaling pathway                                                                               | 97.2  | 104.8 | 96.7  | 97.4  | 100.7 | 103.9 | 101.3 | 101.6 |
| 324073114 | Hdac7                                        | 953  | 102.9 |                                                                                                      | 96.6  | 96.9  | 89.3  | 92    | 110.7 | 109.5 | 114   | 113.4 |
| 171906557 | Padi2                                        | 673  | 76.2  |                                                                                                      | 108.4 | 108.5 | 117.2 | 107.6 | 95.6  | 98.5  | 88.3  | 89.9  |

|           |                                         |      |       |                                                                                                                                                                                                                                                                 |       |       |       |       |       |       |       |       |
|-----------|-----------------------------------------|------|-------|-----------------------------------------------------------------------------------------------------------------------------------------------------------------------------------------------------------------------------------------------------------------|-------|-------|-------|-------|-------|-------|-------|-------|
| 261823938 | Gm13072;<br>Trmt112-<br>ps2;<br>Trmt112 | 125  | 14.1  |                                                                                                                                                                                                                                                                 | 115.4 | 115.3 | 96.6  | 98.3  | 91.7  | 92.3  | 106.6 | 101.3 |
| 198278501 | Cdc40                                   | 579  | 65.4  | Spliceosome                                                                                                                                                                                                                                                     | 100.1 | 102.9 | 100.9 | 99    | 100.9 | 104.9 | 96.1  | 91.8  |
| 58037443  | Gid8                                    | 228  | 26.8  |                                                                                                                                                                                                                                                                 | 103.7 | 103.7 | 90.1  | 87.1  | 112.6 | 112.2 | 114.6 | 113.5 |
| 70906453  | Bcas2                                   | 225  | 26.1  | Spliceosome                                                                                                                                                                                                                                                     | 101.2 | 93.7  | 93.8  | 96.5  | 97.3  | 102.3 | 102.3 | 103.1 |
| 47059026  | Ssbp1                                   | 148  | 17.1  |                                                                                                                                                                                                                                                                 | 114.5 | 104.5 | 86.6  | 95.3  | 119.5 | 115.5 | 107.1 | 104.3 |
| 6753036   | Aldh2                                   | 519  | 56.5  | Histidine metabolism; Pyruvate metabolism; Arginine and proline metabolism; Tryptophan metabolism; Valine, leucine and isoleucine degradation; Metabolic pathways; Lysine degradation; Fatty acid degradation; Glycolysis / Gluconeogenesis; beta-Alanine metab | 116.1 | 117.4 | 99.8  | 95.5  | 93.2  | 92.8  | 91.7  | 96.9  |
| 31982726  | Srpk1                                   | 648  | 73    | Herpes simplex infection                                                                                                                                                                                                                                        | 81.9  | 91.9  | 93.9  | 94.5  | 114   | 106.4 | 108.9 | 106.8 |
| 120587003 | Tbc1d1                                  | 1162 | 131.9 |                                                                                                                                                                                                                                                                 | 106.9 | 106.9 | 107.6 | 105.1 | 88.2  | 94.5  | 95.4  | 93.5  |
| 93004085  | Pcnt                                    | 2916 | 331.1 |                                                                                                                                                                                                                                                                 | 113.1 | 109.8 | 100.6 | 99.9  | 100.3 | 109.1 | 92.5  | 105.3 |
| 310616733 | H2-Q7                                   | 334  | 37.9  | Endocytosis; Herpes simplex infection; Allograft rejection; Epstein-Barr virus infection; Cell adhesion molecules (CAMs); HTLV-I infection; Phagosome; Graft-versus-host disease; Viral myocarditis; Antigen processing and presentation; Type I diabetes melli | 115.3 | 113   | 114.9 | 115   | 86.1  | 82.7  | 88.8  | 87.3  |
| 126012517 | Aimp1                                   | 319  | 35.1  |                                                                                                                                                                                                                                                                 | 90.4  | 107.3 | 93.1  | 94.9  | 108   | 104.7 | 117.1 | 117.1 |
| 11177922  | Rfc2                                    | 349  | 38.7  | DNA replication, nucleotide excision repair, mismatch repair                                                                                                                                                                                                    | 81.3  | 77    | 85.5  | 79.7  | 122.3 | 130.4 | 132   | 127.2 |
| 21704248  | Rrp9                                    | 475  | 52.1  |                                                                                                                                                                                                                                                                 | 105.8 | 97.4  | 96.4  | 94.6  | 95    | 103.6 | 102.2 | 110.1 |
| 28916687  | Rab5b                                   | 215  | 23.7  | Endocytosis; Ras signaling pathway; Tuberculosis; Phagosome; Vasopressin-regulated water reabsorption; Amoebiasis                                                                                                                                               | 104   | 106.1 | 102.9 | 104.3 | 91.7  | 95.7  | 99.1  | 99.7  |
| 157951741 | Cat                                     | 527  | 59.8  | FoxO signaling pathway; Tryptophan metabolism; Amyotrophic lateral sclerosis (ALS); Longevity regulating pathway; Carbon metabolism; Glyoxylate and dicarboxylate metabolism; Longevity regulating pathway - multiple species; Peroxisome                       | 99.2  | 92.7  | 96.1  | 92.9  | 102.1 | 101.3 | 108.4 | 109.6 |
| 54020676  | Eif2a                                   | 581  | 64.4  |                                                                                                                                                                                                                                                                 | 90.6  | 88.9  | 88.7  | 92.3  | 111.3 | 112.6 | 117.7 | 114   |
| 13385660  | Xab2                                    | 855  | 99.9  | Spliceosome                                                                                                                                                                                                                                                     | 96.4  | 106.2 | 96.4  | 97.3  | 101.8 | 97.6  | 103.3 | 100.3 |
| 6755206   | Psmb7                                   | 277  | 29.9  | Proteasome                                                                                                                                                                                                                                                      | 81.8  | 80.8  | 83.8  | 82.7  | 119.4 | 113.2 | 121.8 | 128   |
| 226958653 | Rpl19;<br>Rpl19-<br>ps11                | 196  | 23.5  | Ribosome                                                                                                                                                                                                                                                        | 88.7  | 93.3  | 85.3  | 86.5  | 99.4  | 102.9 | 123.4 | 127.9 |
| 160707896 | Strap                                   | 350  | 38.4  | RNA transport                                                                                                                                                                                                                                                   | 85.9  | 87.1  | 87    | 85.2  | 114.5 | 113.8 | 117.2 | 114.7 |
| 356995870 | Prkd2                                   | 875  | 96.5  | Rap1 signaling pathway, Andosterone synthesis and secretion                                                                                                                                                                                                     | 118.1 | 123.6 | 102.7 | 106.1 | 86.3  | 78.4  | 75    | 75    |
| 30424711  | Rps19bpl                                | 143  | 16    |                                                                                                                                                                                                                                                                 | 101.4 | 112.2 | 94.4  | 98.2  | 106.2 | 101.8 | 111   | 113.6 |
| 31981945  | Rpl13a                                  | 203  | 23.4  | Ribosome                                                                                                                                                                                                                                                        | 91.5  | 95.3  | 90.9  | 89.8  | 107.6 | 107.3 | 108.3 | 97.1  |

|           |                                 |      |       |                                                                                                                                                                                                                                                                 |       |       |       |       |       |       |       |       |
|-----------|---------------------------------|------|-------|-----------------------------------------------------------------------------------------------------------------------------------------------------------------------------------------------------------------------------------------------------------------|-------|-------|-------|-------|-------|-------|-------|-------|
| 254587958 | Rtca;<br>Rted1                  | 366  | 39.2  |                                                                                                                                                                                                                                                                 | 109.2 | 117.1 | 105.6 | 114.1 | 91.3  | 87.1  | 94.6  | 90.9  |
| 237649040 | Smek1;<br>Ppp4r3a               | 833  | 95.3  |                                                                                                                                                                                                                                                                 | 101.1 | 99.7  | 92.5  | 96    | 106   | 107.8 | 107.3 | 105.5 |
| 124486939 | Lrch3                           | 778  | 86.3  |                                                                                                                                                                                                                                                                 | 112.2 | 107.4 | 99.4  | 95.4  | 123.5 | 117   | 96.7  | 101.4 |
| 124301227 | Noc2l                           | 750  | 85.6  |                                                                                                                                                                                                                                                                 | 81.9  | 106.1 | 83.6  | 82.2  | 118.2 | 112.8 | 126.2 | 120.6 |
| 125490368 | Pip4k2a                         | 405  | 46.1  | Regulation of actin cytoskeleton; Inositol phosphate metabolism; Phosphatidylinositol signaling system                                                                                                                                                          | 121.4 | 94.2  | 100.6 | 125.2 | 94    | 106.2 | 89.7  | 90.2  |
| 34328400  | Srsf1;<br>LOC102641923          | 248  | 27.7  | Herpes simplex infection; Spliceosome                                                                                                                                                                                                                           | 91    | 92.6  | 106   | 105.5 | 97.9  | 94    | 101.7 | 100.8 |
| 124486841 | Rprd2                           | 1469 | 156.5 |                                                                                                                                                                                                                                                                 | 101.7 | 103.1 | 100.3 | 97.3  | 100.4 | 96.2  | 100.6 | 102.8 |
| 6680720   | Arf4                            | 180  | 20.4  |                                                                                                                                                                                                                                                                 | 91.4  | 86.3  | 91.7  | 96.5  | 111.8 | 112.4 | 91.1  | 98.3  |
| 30794154  | Rbm19                           | 952  | 106   |                                                                                                                                                                                                                                                                 | 89.3  | 96.6  | 92.4  | 93.6  | 122.8 | 104.7 | 112.3 | 110.9 |
| 31980762  | Sod2                            | 222  | 24.6  | FoxO signaling pathway; Longevity regulating pathway; Huntington's disease; Longevity regulating pathway - multiple species; Peroxisome                                                                                                                         | 112.2 | 111.2 | 107.6 | 107.9 | 85    | 87.1  | 94.6  | 94.7  |
| 166851848 | Lrwd1                           | 648  | 71.5  |                                                                                                                                                                                                                                                                 | 104.8 | 102.4 | 101.3 | 102.8 | 107.4 | 110.6 | 109.1 | 110.5 |
| 39930559  | Rcor1                           | 382  | 43.9  | Huntington's disease                                                                                                                                                                                                                                            | 95.9  | 96.4  | 99.6  | 97.2  | 101.7 | 101.7 | 103.4 | 104.3 |
| 33563284  | Cops6                           | 324  | 35.9  |                                                                                                                                                                                                                                                                 | 106.6 | 100.9 | 95.4  | 94.7  | 95.1  | 93.6  | 100.8 | 101.4 |
| 6755228   | Ptpn11                          | 597  | 68.4  | Leukocyte transendothelial migration; Herpes simplex infection; Phospholipase D signaling pathway; Ras signaling pathway; Jak-STAT signaling pathway; Insulin resistance; Axon guidance; Proteoglycans in cancer; Neurotrophin signaling pathway; Adipocytokine | 102   | 102.8 | 108.2 | 97.9  | 97.6  | 106.2 | 95.9  | 98.2  |
| 148664250 | Hnrnpdl;<br>Hnrnpdl1;<br>Hnrnd1 | 420  | 46.2  |                                                                                                                                                                                                                                                                 | 77.6  | 78.9  | 75.7  | 78.5  | 111.7 | 111.3 | 142.7 | 139.5 |
| 6680690   | Prdx3                           | 257  | 28.1  |                                                                                                                                                                                                                                                                 | 103.8 | 105.6 | 98.2  | 100   | 102.1 | 98.2  | 102.2 | 106.2 |
| 56605680  | Thoc6                           | 341  | 37.3  | RNA transport                                                                                                                                                                                                                                                   | 97.3  | 99.6  | 96.4  | 92.4  | 101.5 | 101.3 | 105.4 | 99.1  |
| 165905633 | Nudcd1                          | 582  | 66.7  |                                                                                                                                                                                                                                                                 | 92.8  | 96.9  | 85.3  | 89    | 109.8 | 114.2 | 111.6 | 104.8 |
| 228480253 | Sept2                           | 321  | 37    |                                                                                                                                                                                                                                                                 | 93.5  | 91.2  | 90.7  | 87.4  | 110.5 | 110.3 | 118.9 | 124.4 |
| 21312246  | Polr2d                          | 142  | 16.3  | RNA polymerase; Epstein-Barr virus infection; Metabolic pathways; Purine metabolism; Huntington's disease; Pyrimidine metabolism                                                                                                                                | 113.4 | 110.2 | 109.8 | 110.6 | 96.1  | 91.5  | 95.1  | 92.5  |
| 23346461  | Ndufs2                          | 463  | 52.6  | Metabolic pathways; Huntington's disease; Non-alcoholic fatty liver disease (NAFLD); Oxidative phosphorylation; Parkinson's disease; Alzheimer's disease                                                                                                        | 101.4 | 104.2 | 97.9  | 100.4 | 102.7 | 101.9 | 98.4  | 100.1 |
| 226958572 | Gtf2a1                          | 378  | 41.6  | Basal transcription factors; Viral carcinogenesis                                                                                                                                                                                                               | 106.8 | 110.6 | 105.1 | 109.5 | 100   | 96.7  | 104.7 | 97    |
| 13385310  | Pccb                            | 541  | 58.4  | Valine, leucine and isoleucine degradation; Metabolic pathways; Propanoate metabolism; Carbon metabolism; Glyoxylate and dicarboxylate metabolism                                                                                                               | 106.1 | 109   | 95.7  | 102.1 | 102.9 | 103.5 | 102   | 106   |
| 157057145 | Ablim1                          | 861  | 96.8  | Axon guidance                                                                                                                                                                                                                                                   | 123.6 | 128.5 | 120.6 | 125.5 | 67    | 70    | 78.6  | 81.3  |

|           |                                                          |      |       |                                                                                                                                                                |       |       |       |       |       |       |       |       |
|-----------|----------------------------------------------------------|------|-------|----------------------------------------------------------------------------------------------------------------------------------------------------------------|-------|-------|-------|-------|-------|-------|-------|-------|
| 171184435 | Ptplad1;<br>Hacd3                                        | 362  | 43.1  | Fatty acid metabolism; Fatty acid elongation; Biosynthesis of unsaturated fatty acids                                                                          | 91.2  | 90.7  | 102   | 105.7 | 103.9 | 109.3 | 96.9  | 92.1  |
| 209862941 | Ikbkg                                                    | 430  | 50.2  |                                                                                                                                                                | 105.7 | 106.2 | 104   | 100.8 | 94.9  | 95.4  | 101.7 | 101.7 |
| 21314832  | Ugp2                                                     | 508  | 56.9  | Metabolic pathways; Amino sugar and nucleotide sugar metabolism; Starch and sucrose metabolism; Pentose and glucuronate interconversions; Galactose metabolism | 103.7 | 102.3 | 101.1 | 99.5  | 96.2  | 97.2  | 105.4 | 103.9 |
| 31980996  | Acss2                                                    | 701  | 78.8  | Pyruvate metabolism; Metabolic pathways; Glycolysis / Gluconeogenesis; Propanoate metabolism; Carbon                                                           | 111.4 | 111   | 86.5  | 81    | 88.5  | 83.2  | 92.5  | 90.3  |
| 10946972  | Cope                                                     | 308  | 34.5  |                                                                                                                                                                | 99.1  | 97.5  | 98.3  | 97.9  | 97.3  | 96.8  | 104.1 | 101.3 |
| 58037115  | 0610011F<br>06Rik;<br>Mettl26                            | 204  | 22.7  |                                                                                                                                                                | 112.7 | 111.8 | 108.2 | 114.8 | 82.4  | 83.9  | 94.5  | 92.6  |
| 124487157 | Heatr5b                                                  | 2070 | 224.2 |                                                                                                                                                                | 102.3 | 115.3 | 96.8  | 90.1  | 106.9 | 129.8 | 108.5 | 85.9  |
| 255683299 | Ppwd1                                                    | 646  | 73.3  |                                                                                                                                                                | 107.7 | 102.7 | 96.7  | 100.3 | 95.7  | 99.7  | 88.3  | 100.1 |
| 113680741 | Hsd11b1                                                  | 292  | 32.3  | Steroid hormone biosynthesis; Metabolic pathways; Chemical carcinogenesis; Metabolism of xenobiotics by cytochrome P450                                        | 138.6 | 151.4 | 121.6 | 118.8 | 82.7  | 85.7  | 71.5  | 68.6  |
| 7106389   | Psm7                                                     | 248  | 27.8  | Proteasome                                                                                                                                                     | 97.9  | 95.6  | 98.6  | 94.7  | 100.3 | 99.1  | 108.7 | 110.2 |
| 71979675  | Las11                                                    | 759  | 87.5  |                                                                                                                                                                | 89    | 96.9  | 86.7  | 87.5  | 105.8 | 114   | 103.9 | 99.1  |
| 110227381 | Capns1                                                   | 268  | 28.4  |                                                                                                                                                                | 115.8 | 102.8 | 105.9 | 111.9 | 84.3  | 94.7  | 73.8  | 77.2  |
| 262359900 | Eif5a                                                    | 154  | 16.8  |                                                                                                                                                                | 92.2  | 89    | 98.1  | 94.5  | 112.3 | 112.7 | 73.4  | 93.6  |
| 347582617 | S100a13                                                  | 160  | 17.7  |                                                                                                                                                                | 132.7 | 133.8 | 118.6 | 121.2 | 68.1  | 66.3  | 81.2  | 80.9  |
| 153791468 | 3110003A<br>17Rik;<br>Abracl                             | 81   | 9.1   |                                                                                                                                                                | 73.6  | 95.3  | 154.9 | 153.1 | 91    | 92.1  | 74.3  | 74.7  |
| 46518499  | Taf10                                                    | 218  | 21.8  | Herpes simplex infection; Basal transcription factors                                                                                                          | 122.4 | 81.2  | 101.9 | 94    | 94.6  | 236.3 | 96.5  | 85.9  |
| 58037117  | Ndufs3                                                   | 263  | 30.1  | Metabolic pathways; Huntington's disease; Non-alcoholic fatty liver disease (NAFLD); Oxidative phosphorylation; Parkinson's disease; Alzheimer's disease       | 107.2 | 103.9 | 109.1 | 112.5 | 100.3 | 104.7 | 93.9  | 89.8  |
| 6755202   | Psm3                                                     | 205  | 22.9  | Proteasome                                                                                                                                                     | 87.3  | 86    | 105.9 | 106   | 109.4 | 110.3 | 104.1 | 99.8  |
| 225703058 | Ascc3                                                    | 2198 | 250.4 |                                                                                                                                                                | 101.3 | 87.9  | 89.6  | 97.8  | 113.7 | 113.9 | 103.2 | 107.3 |
| 9789881   | Arl3                                                     | 182  | 20.5  |                                                                                                                                                                | 95.8  | 88.3  | 98    | 88    | 107   | 106.8 | 109.7 | 116.2 |
| 6679465   | Prkesh                                                   | 521  | 58.8  | Protein processing in endoplasmic reticulum                                                                                                                    | 91.3  | 91.4  | 89.3  | 88.6  | 106.8 | 107.7 | 119.1 | 118.2 |
| 21313468  | Tsfm                                                     | 324  | 35.3  |                                                                                                                                                                | 93.5  | 155   | 98    | 97.2  | 107   | 98.4  | 111.3 | 99.8  |
| 407260973 | 1ceb1;<br>Eloc;<br>LOC1010<br>56616;<br>LOC1026<br>42819 | 112  | 12.5  | Ubiquitin mediated proteolysis; HIF-1 signaling pathway; Pathways in cancer; Renal cell carcinoma                                                              | 97    | 100.2 | 94.6  | 93.9  | 96.7  | 104.2 | 116.5 | 110.8 |
| 7949055   | Hpcall                                                   | 193  | 22.3  |                                                                                                                                                                | 127.2 | 130.4 | 114.9 | 112.2 | 79.5  | 80    | 86.2  | 87.2  |
| 46395466  | Tes                                                      | 419  | 47.7  |                                                                                                                                                                | 105.1 | 105.3 | 104.5 | 102.8 | 83.9  | 80.9  | 88.9  | 92.8  |
| 164698406 | Cenpc1                                                   | 906  | 102.1 |                                                                                                                                                                | 89.9  | 95.9  | 92.5  | 95.7  | 107.7 | 103.8 | 115.5 | 109.3 |

|           |                                         |      |       |                                                                                                                                                                                                                                                                  |       |       |       |       |       |       |       |       |
|-----------|-----------------------------------------|------|-------|------------------------------------------------------------------------------------------------------------------------------------------------------------------------------------------------------------------------------------------------------------------|-------|-------|-------|-------|-------|-------|-------|-------|
| 19527218  | 1810008A<br>18Rik;<br>Fam207a           | 219  | 24.8  |                                                                                                                                                                                                                                                                  | 95.2  | 98.4  | 94.5  | 101.8 | 104   | 99.7  | 109.8 | 107.4 |
| 154240730 | Clint1                                  | 623  | 67.7  |                                                                                                                                                                                                                                                                  | 92    | 100.6 | 100.6 | 100.2 | 103.7 | 94.5  | 108.1 | 106   |
| 30794416  | Vps36                                   | 386  | 43.7  | Endocytosis                                                                                                                                                                                                                                                      | 98    | 101.8 | 94.7  | 99.3  | 101.8 | 104.6 | 107.1 | 100.7 |
| 80978932  | Cbl                                     | 913  | 100.5 | ErbB signaling pathway; Endocytosis; T cell receptor signaling pathway; Ubiquitin mediated proteolysis; Insulin signaling pathway; Proteoglycans in cancer; Pathways in cancer: Chronic myeloid leukemia; Bacterial invasion of                                  | 106.3 | 122.6 | 105.2 | 105.1 | 91    | 88.7  | 89.3  | 90.8  |
| 6679961   | Mtpn                                    | 118  | 12.9  |                                                                                                                                                                                                                                                                  | 124.2 | 125.5 | 121.5 | 122.7 | 77.4  | 74.9  | 89    | 87.9  |
| 84875515  | Shh1                                    | 360  | 39.7  | mTOR signaling pathway; RNA transport                                                                                                                                                                                                                            | 94.6  | 96.3  | 86.3  | 87.9  | 108.7 | 104   | 121.3 | 116.3 |
| 158937300 | Sec63                                   | 760  | 87.8  | Protein export; Protein processing in endoplasmic reticulum                                                                                                                                                                                                      | 100.9 | 100.9 | 85.8  | 85.3  | 123.4 | 122.4 | 108.3 | 111.4 |
| 255522939 | Pgm3                                    | 542  | 59.4  | Metabolic pathways; Amino sugar and nucleotide sugar metabolism                                                                                                                                                                                                  | 114.3 | 111.1 | 104.6 | 103.9 | 93.7  | 96.2  | 102.6 | 103.3 |
| 46592839  | Gripap1                                 | 806  | 92.7  |                                                                                                                                                                                                                                                                  | 101.1 | 105.9 | 91.8  | 97.9  | 100.8 | 101.1 | 103.7 | 102.5 |
| 134053871 | Gbp3                                    | 620  | 70.8  | NOD-like receptor signaling pathway                                                                                                                                                                                                                              | 103.4 | 99.9  | 93.1  | 88.8  | 113.3 | 124   | 128.4 | 140   |
| 31543902  | Txn1l                                   | 289  | 32.2  |                                                                                                                                                                                                                                                                  | 89.5  | 85.9  | 90.1  | 90    | 108.6 | 105.9 | 107.2 | 112.4 |
| 407262350 | Ube2r;<br>LOC100044900;<br>LOC102641751 | 158  | 18    | MicroRNAs in cancer; Ubiquitin mediated proteolysis; NF-kappa B signaling pathway; RNA transport                                                                                                                                                                 | 121.2 | 122.8 | 132.5 | 130.1 | 69.6  | 69.5  | 69.8  | 68.3  |
| 38678526  | Nup188                                  | 1759 | 196.6 | RNA transport                                                                                                                                                                                                                                                    | 94.6  | 92.2  | 93.8  | 88.2  | 107.3 | 107   | 107.4 | 106.2 |
| 21704096  | Tardbp                                  | 414  | 44.5  |                                                                                                                                                                                                                                                                  | 100.1 | 103.4 | 100.2 | 104.4 | 99.9  | 94.8  | 91.8  | 82.5  |
| 7304989   | Ctbp1                                   | 441  | 47.7  | Wnt signaling pathway; Notch signaling pathway; Pathways in cancer: Chronic myeloid leukemia                                                                                                                                                                     | 83.1  | 89.7  | 113.5 | 116.5 | 113   | 107   | 90.7  | 90.5  |
| 19745144  | Creb1                                   | 341  | 36.7  | Cholinergic synapse; Dopaminergic synapse; TNF signaling pathway; Amphetamine addiction; Insulin resistance; Tuberculosis; Melanogenesis; Hepatitis B; Circadian rhythm; HTLV-I infection; Thyroid hormone synthesis; Osteoclast differentiation; Longevity reg. | 108.9 | 109.4 | 103.2 | 107.4 | 89.1  | 80.3  | 101.5 | 101.4 |
| 6678824   | Mcl1                                    | 331  | 35.2  | MicroRNAs in cancer; Jak-STAT signaling pathway; PI3K-Akt signaling pathway; Apoptosis                                                                                                                                                                           | 79.1  | 84.8  | 121.9 | 75.6  | 122   | 126.6 | 116.6 | 131.3 |
| 45439304  | Htt                                     | 3120 | 344.6 | Huntington's disease                                                                                                                                                                                                                                             | 102.5 | 109.4 | 96.5  | 97.8  | 107.7 | 111.5 | 105.2 | 107.7 |
| 21450325  | Blvrb                                   | 206  | 22.2  | Krobovirin metabolism; Porphyrin and hemoephyrin metabolism                                                                                                                                                                                                      | 115   | 122.5 | 135.3 | 136   | 87.7  | 85.2  | 86.5  | 86.4  |
| 31981174  | Pole3                                   | 145  | 16.7  | DNA replication; Metabolic pathways; HTLV-I infection; Purine metabolism; Nucleotide excision repair; Pyrimidine metabolism; Base excision repair                                                                                                                | 101.3 | 94    | 93.2  | 76.4  | 108   | 122.8 | 116.7 | 138.3 |
| 30841008  | Rab18                                   | 206  | 23    |                                                                                                                                                                                                                                                                  | 98.1  | 100   | 94.9  | 97.4  | 106.5 | 103.7 | 100.4 | 93.9  |
| 144922627 | Ncbp1                                   | 790  | 91.9  | mRNA surveillance pathway; Spliceosome; RNA transport                                                                                                                                                                                                            | 101.5 | 102.3 | 97.8  | 95.9  | 105.9 | 102.7 | 94.7  | 98.6  |
| 9055370   | Eif3i                                   | 325  | 36.4  | RNA transport                                                                                                                                                                                                                                                    | 84.7  | 81.5  | 97.5  | 94.9  | 118.1 | 119.7 | 104.5 | 109.9 |
| 12963663  | Mdp1                                    | 164  | 18.6  |                                                                                                                                                                                                                                                                  | 124.1 | 124.9 | 127   | 132.5 | 71.2  | 73.4  | 80.7  | 75.9  |
| 29171318  | Bola2                                   | 86   | 10.2  |                                                                                                                                                                                                                                                                  | 111.1 | 106.4 | 100.9 | 104.1 | 91.6  | 95.4  | 110.3 | 111.2 |



|           |                        |      |       |                                                                                                                                                                                                                                                                       |       |       |       |       |       |       |       |       |
|-----------|------------------------|------|-------|-----------------------------------------------------------------------------------------------------------------------------------------------------------------------------------------------------------------------------------------------------------------------|-------|-------|-------|-------|-------|-------|-------|-------|
| 12963675  | Ociad1                 | 247  | 27.6  |                                                                                                                                                                                                                                                                       | 98.1  | 100.6 | 99.1  | 94.3  | 95.4  | 100.6 | 99.6  | 93    |
| 226958601 | Golgb1                 | 3238 | 369.9 |                                                                                                                                                                                                                                                                       | 97    | 104.4 | 105.1 | 94.1  | 111.5 | 108.8 | 102.5 | 106.4 |
| 13385314  | Nudt16l1               | 211  | 23.4  | Proteoglycans in cancer                                                                                                                                                                                                                                               | 109.4 | 113.1 | 107.5 | 110.5 | 88.6  | 94.8  | 83.2  | 87.5  |
| 189458810 | Chd2                   | 1827 | 210.7 |                                                                                                                                                                                                                                                                       | 102.7 | 102.8 | 98.1  | 93.5  | 100.8 | 102.1 | 104.6 | 100.5 |
| 139948802 | Uchl3                  | 230  | 26.1  |                                                                                                                                                                                                                                                                       | 118   | 119.8 | 112.9 | 115.3 | 76.7  | 75.9  | 88.2  | 92.3  |
| 18087805  | Rps2;<br>Rps2-ps13     | 293  | 31.2  | Ribosome                                                                                                                                                                                                                                                              | 82.3  | 83.7  | 87.3  | 88.4  | 117.4 | 114.6 | 117.8 | 117.4 |
| 227116300 | Kpna6                  | 536  | 59.9  |                                                                                                                                                                                                                                                                       | 97.4  | 99.1  | 88.4  | 93.9  | 108   | 103.7 | 112.6 | 106.8 |
| 268839673 | Ubxn7                  | 489  | 54.8  |                                                                                                                                                                                                                                                                       | 106.3 | 107.1 | 108.4 | 107   | 91.2  | 90.3  | 94.7  | 99.2  |
| 148747333 | Trmt6                  | 497  | 55.5  |                                                                                                                                                                                                                                                                       | 94.1  | 94.4  | 98.6  | 102.4 | 103.8 | 104.9 | 104.5 | 95    |
| 6680083   | Grb2                   | 217  | 25.2  | ErbB signaling pathway; FoxO signaling pathway; Acute myeloid leukemia; mTOR signaling pathway; T cell receptor signaling pathway; Phospholipase D signaling pathway; MAPK signaling pathway; MicroRNAs in cancer; Ras signaling pathway; Prolactin signaling pathway | 115.9 | 113.3 | 124.1 | 124   | 79.6  | 79.7  | 79.7  | 82.4  |
| 227496903 | Ccdc12                 | 166  | 18.9  | Spliceosome                                                                                                                                                                                                                                                           | 126.9 | 129.6 | 112   | 113.6 | 84.5  | 83.4  | 98.4  | 98.4  |
| 13386122  | Rpa3                   | 121  | 13.6  | DNA replication; Homologous recombination; Nucleotide excision repair; Fanconi anemia pathway; Mismatch repair                                                                                                                                                        | 122.1 | 91    | 98.2  | 86    | 106.3 | 108.1 | 108.5 | 120.4 |
| 13385918  | Paip2                  | 124  | 14.7  |                                                                                                                                                                                                                                                                       | 87.5  | 89    | 74.6  | 82.3  | 113.5 | 113.7 | 138.3 | 136.2 |
| 166851822 | Fto                    | 502  | 58    |                                                                                                                                                                                                                                                                       | 96.4  | 95    | 93.7  | 95.4  | 110.7 | 109.6 | 108.9 | 102.2 |
| 165377291 | Wtap                   | 396  | 44.2  |                                                                                                                                                                                                                                                                       | 92.9  | 89.2  | 88.4  | 80.3  | 88    | 78.7  | 97.1  | 86.9  |
| 33469119  | Fyb                    | 819  | 90    | Rap1 signaling pathway                                                                                                                                                                                                                                                | 105.4 | 102.6 | 118   | 115.7 | 84.8  | 84.4  | 98.5  | 94.1  |
| 78214312  | Atp5f1                 | 256  | 28.9  | Metabolic pathways; Huntington's disease; Oxidative phosphorylation; Parkinson's disease; Alzheimer's disease                                                                                                                                                         | 94.1  | 93.9  | 95.2  | 95    | 102.9 | 102.1 | 107.7 | 110.9 |
| 34610235  | Rtn4                   | 1162 | 126.5 | Alzheimer's disease                                                                                                                                                                                                                                                   | 94.4  | 93.2  | 87    | 85.2  | 108   | 105.6 | 111.5 | 113.7 |
| 83921612  | Txndc5                 | 417  | 46.4  | Protein processing in endoplasmic reticulum                                                                                                                                                                                                                           | 89.8  | 89.8  | 95    | 95    | 111.3 | 113.5 | 111.5 | 114.9 |
| 254553470 | Spata5                 | 893  | 97.2  | Ribosome biogenesis in eukaryotes                                                                                                                                                                                                                                     | 92.2  | 87.9  | 84.6  | 88.4  | 113.4 | 110.8 | 123.6 | 121.5 |
| 39930417  | Exosc3                 | 274  | 29.5  | RNA degradation                                                                                                                                                                                                                                                       | 111.5 | 108.4 | 100.7 | 97.9  | 98.4  | 102.2 | 80.6  | 83.7  |
| 76096375  | Dido1                  | 2256 | 247   |                                                                                                                                                                                                                                                                       | 112.3 | 108.1 | 96.2  | 101.4 | 95.4  | 96.8  | 103.6 | 97.2  |
| 247300905 | Rpp38                  | 280  | 31.2  | Ribosome biogenesis in eukaryotes; RNA transport                                                                                                                                                                                                                      | 104.4 | 108.1 | 100.8 | 101.3 | 103.3 | 104.5 | 95.4  | 98.7  |
| 226442952 | Krr1                   | 380  | 43.5  |                                                                                                                                                                                                                                                                       | 100.4 | 100.7 | 99.9  | 94.5  | 96.3  | 103.1 | 109.4 | 106.4 |
| 22094119  | Myo18a                 | 2035 | 230.8 |                                                                                                                                                                                                                                                                       | 111.3 | 103.9 | 95.6  | 92.3  | 91.5  | 90.6  | 93.5  | 105.5 |
| 84370300  | Agap2;<br>LOC105242480 | 1186 | 124.4 | FoxO signaling pathway; Endocytosis                                                                                                                                                                                                                                   | 108.2 | 108.9 | 109.8 | 110.8 | 95.2  | 87.5  | 88.6  | 94.7  |
| 13385322  | Ndufb7                 | 137  | 16.3  | Metabolic pathways; Huntington's disease; Non-alcoholic fatty liver disease (NAFLD); Oxidative phosphorylation; Parkinson's disease; Alzheimer's disease                                                                                                              | 111.9 | 112.2 | 102.1 | 105.5 | 100.9 | 103.5 | 101   | 98.1  |
| 162135936 | Uba3                   | 462  | 51.7  | Ubiquitin mediated proteolysis                                                                                                                                                                                                                                        | 93.1  | 96.7  | 90.6  | 90.8  | 101.2 | 92.4  | 105.7 | 102.1 |
| 124378050 | Sec16a                 | 2357 | 254   |                                                                                                                                                                                                                                                                       | 97.4  | 100.5 | 90.9  | 93.4  | 107.4 | 115.8 | 103   | 101.2 |
| 21312728  | Ebna1bp2               | 306  | 34.7  |                                                                                                                                                                                                                                                                       | 91.9  | 93.3  | 97    | 95.6  | 105.6 | 108.1 | 110.6 | 117.5 |

|           |                             |      |       |                                                                                                                                                                                                                              |       |       |       |       |       |       |       |       |
|-----------|-----------------------------|------|-------|------------------------------------------------------------------------------------------------------------------------------------------------------------------------------------------------------------------------------|-------|-------|-------|-------|-------|-------|-------|-------|
| 13386276  | Rpap3                       | 660  | 74.1  |                                                                                                                                                                                                                              | 96.5  | 90.2  | 93.1  | 86.2  | 126.8 | 116.7 | 84.1  | 106.8 |
| 133778958 | Dcpl1a                      | 602  | 65.2  | RNA degradation                                                                                                                                                                                                              | 96.4  | 103.9 | 96.9  | 100.9 | 105.6 | 93.7  | 100.5 | 118.4 |
| 6680596   | Kpna3                       | 521  | 57.7  |                                                                                                                                                                                                                              | 94.1  | 88.6  | 84.5  | 88.8  | 124.7 | 114.8 | 117.4 | 113.7 |
| 254587947 | Ppp2r4;<br>Ptpa             | 323  | 36.7  | Insulin resistance                                                                                                                                                                                                           | 119.5 | 118   | 121.4 | 117.6 | 77.4  | 82.1  | 76.2  | 78.1  |
| 148238335 | Alyref2                     | 218  | 23.8  | mRNA surveillance pathway; Herpes simplex infection;<br>Spliceosome; RNA transport                                                                                                                                           | 124.1 | 126.3 | 111.3 | 109.8 | 78.5  | 82    | 91.1  | 79.4  |
| 33859652  | Nelfa;<br>Whsc2             | 530  | 57.5  |                                                                                                                                                                                                                              | 99.5  | 100.2 | 96.4  | 90.5  | 85    | 89.6  | 88.5  | 87.7  |
| 126517489 | Cd5                         | 494  | 53.8  | Hematopoietic cell lineage                                                                                                                                                                                                   | 81    | 83.1  | 97.6  | 89.5  | 109.1 | 111   | 126.4 | 124.7 |
| 6680351   | Irgm1                       | 409  | 46.5  | Toxoplasmosis                                                                                                                                                                                                                | 104.8 | 102.4 | 90.6  | 92.1  | 110.7 | 107.8 | 99.7  | 105.3 |
| 163838660 | Atm                         | 3066 | 349.2 | FoxO signaling pathway; Platinum drug resistance; p53<br>signaling pathway; Homologous recombination;<br>MicroRNAs in cancer; HTLV-I infection; Transcriptional<br>misregulation in cancer: Cell cycle; NF-kappa B signaling | 98.9  | 99.2  | 109.6 | 107.8 | 96.5  | 101.1 | 107.2 | 103.5 |
| 13385472  | Rpl14                       | 217  | 23.5  | Ribosome                                                                                                                                                                                                                     | 94    | 88.5  | 92.4  | 88.1  | 106.4 | 103.4 | 115.7 | 117.4 |
| 19525729  | Cry11                       | 319  | 35.2  | metabolic pathways; Pentose and glucuronate<br>interconversions                                                                                                                                                              | 116   | 114.5 | 116.2 | 110.1 | 86.7  | 91.5  | 82.7  | 91.2  |
| 6679261   | Pdha1                       | 390  | 43.2  | Pyruvate metabolism; Citrate cycle (TCA cycle); Metabolic<br>pathways; Glycolysis / Gluconeogenesis; HIF-1 signaling<br>pathway; Carbon metabolism; Central carbon metabolism in<br>cancer: Glucagon signaling pathway       | 112   | 114.7 | 107.6 | 109.6 | 95.3  | 94.6  | 89.9  | 91    |
| 148277061 | Cstf2t                      | 632  | 65.8  | mRNA surveillance pathway                                                                                                                                                                                                    | 119.5 | 113.1 | 101.8 | 99    | 100   | 102.3 | 98    | 98.6  |
| 94721328  | Vapa                        | 249  | 27.8  | Tight junction                                                                                                                                                                                                               | 101.6 | 95    | 95.2  | 91.7  | 95.7  | 89.6  | 98    | 99.4  |
| 283945598 | Wibg;<br>Pym1               | 203  | 22.7  | mRNA surveillance pathway; RNA transport                                                                                                                                                                                     | 143.4 | 153   | 107.1 | 99.2  | 75    | 79    | 93    | 103.1 |
| 31088872  | Supv311                     | 779  | 87    |                                                                                                                                                                                                                              | 107.7 | 107.1 | 97.6  | 100.1 | 103.2 | 102.6 | 91.6  | 94    |
| 238637283 | Sln5                        | 884  | 100.8 |                                                                                                                                                                                                                              | 115.8 | 114.3 | 124.1 | 129.6 | 77.9  | 76.8  | 72    | 71.7  |
| 227908803 | Nomo1                       | 1214 | 133.3 |                                                                                                                                                                                                                              | 79.3  | 120.5 | 82    | 76.5  | 128.7 | 123.4 | 121.5 | 123.3 |
| 117676367 | Rrp1                        | 494  | 54.7  |                                                                                                                                                                                                                              | 103.5 | 93.9  | 91.2  | 91.7  | 114.2 | 112.1 | 113.3 | 110.3 |
| 91064876  | Gbp5                        | 590  | 66.9  | NOD-like receptor signaling pathway                                                                                                                                                                                          | 60.4  | 70.1  | 57.9  | 64.3  | 161.5 | 152.2 | 171.1 | 150.6 |
| 6678349   | Tial1                       | 392  | 43.4  |                                                                                                                                                                                                                              | 101.1 | 99.6  | 100.5 | 98.6  | 96.1  | 95.8  | 100.8 | 101   |
| 8394252   | Sec61a1                     | 476  | 52.2  | Phagosome; Protein export; Protein processing in<br>endoplasmic reticulum                                                                                                                                                    | 92.2  | 93.3  | 87.3  | 87.7  | 107.8 | 107.3 | 107   | 105.9 |
| 13195674  | Rab6a                       | 208  | 23.6  |                                                                                                                                                                                                                              | 94.6  | 89.7  | 81.9  | 83.4  | 104.5 | 107.1 | 106.3 | 100.1 |
| 125347767 | BC006779<br>; Helz2         | 2947 | 331.4 |                                                                                                                                                                                                                              | 108   | 105.1 | 101.6 | 97.8  | 107.9 | 110.3 | 97.5  | 97.4  |
| 257743021 | 2410016O<br>06Rik;<br>Riox1 | 603  | 67.5  |                                                                                                                                                                                                                              | 103.1 | 106.5 | 85.2  | 99.4  | 120.5 | 118   | 101   | 93.5  |
| 6996913   | Anxa2                       | 339  | 38.7  |                                                                                                                                                                                                                              | 101.4 | 95.3  | 89.1  | 80.4  | 84.2  | 78.1  | 86.1  | 77.8  |
| 224809371 | Kif2a                       | 716  | 80.8  |                                                                                                                                                                                                                              | 95.1  | 94.4  | 95.4  | 95.1  | 110   | 107.9 | 98.6  | 101.4 |

|           |                                                |      |       |                                                                                                                                                                                                                                                                 |       |       |       |       |       |       |       |       |
|-----------|------------------------------------------------|------|-------|-----------------------------------------------------------------------------------------------------------------------------------------------------------------------------------------------------------------------------------------------------------------|-------|-------|-------|-------|-------|-------|-------|-------|
| 62234487  | Atp2b1                                         | 1220 | 134.7 | Pancreatic secretion; Mineral absorption; Endocrine and other factor-regulated calcium reabsorption; cGMP-PKG signaling pathway; Calcium signaling pathway; Salivary secretion; cAMP signaling pathway; Adrenergic signaling in cardiomyocytes                  | 96.9  | 87.1  | 89.5  | 85.8  | 110.8 | 117.3 | 109   | 107.4 |
| 128485774 | Stat6                                          | 837  | 93.4  | Jak-STAT signaling pathway; Hepatitis B; Inflammatory bowel disease (IBD); Th1 and Th2 cell differentiation                                                                                                                                                     | 108.1 | 106.4 | 101.2 | 101   | 97.7  | 99    | 94.9  | 98.2  |
| 20270031  | Gtf2fl                                         | 508  | 57.2  | Basal transcription factors                                                                                                                                                                                                                                     | 91.1  | 97    | 95.4  | 97.9  | 111.5 | 110.1 | 107.8 | 102.5 |
| 20149726  | Cds2                                           | 444  | 51.3  | Metabolic pathways; Glycerophospholipid metabolism; Phosphatidylinositol signaling system                                                                                                                                                                       | 104.1 | 107.4 | 102.4 | 106   | 99.4  | 94.8  | 92.1  | 87.8  |
| 13386442  | Chmp5                                          | 219  | 24.6  | Endocytosis                                                                                                                                                                                                                                                     | 113   | 111.7 | 115   | 118.4 | 95.9  | 102.9 | 75.8  | 77.1  |
| 117606270 | Nme2                                           | 152  | 17.4  | Metabolic pathways; Purine metabolism; Pyrimidine metabolism                                                                                                                                                                                                    | 91.7  | 92.5  | 96.5  | 90.6  | 103.3 | 105   | 115.9 | 121.1 |
| 255683374 | Ppan                                           | 470  | 52.7  |                                                                                                                                                                                                                                                                 | 83.5  | 83.9  | 84.1  | 80.4  | 115.1 | 112.2 | 124.9 | 122.9 |
| 28849895  | Ints5                                          | 1018 | 108.3 |                                                                                                                                                                                                                                                                 | 98.4  | 96.2  | 99.4  | 98.2  | 97.6  | 103.9 | 100.1 | 100.4 |
| 256355182 | Mina;<br>Riox2                                 | 465  | 53.5  |                                                                                                                                                                                                                                                                 | 106.2 | 108.2 | 100.7 | 99.8  | 101   | 100.3 | 86    | 90.5  |
| 76443694  | Rps27a;<br>Rps27a-<br>ps2;<br>LOC1000<br>42019 | 156  | 17.9  | Ribosome                                                                                                                                                                                                                                                        | 102.6 | 108.7 | 110.1 | 109.6 | 86    | 86    | 101.5 | 101.3 |
| 171543858 | Hmgcl                                          | 325  | 34.2  | Valine, leucine and isoleucine degradation; Metabolic pathways; Butanoate metabolism; Synthesis and degradation of ketone bodies: Peroxisome                                                                                                                    | 110   | 110   | 105.7 | 102.9 | 91.3  | 98.1  | 99    | 102.5 |
| 238814337 | Cbfb                                           | 182  | 21.5  |                                                                                                                                                                                                                                                                 | 110.8 | 111.5 | 100.5 | 135.2 | 82.5  | 100.5 | 95.1  | 90.1  |
| 19745156  | Ipo4                                           | 1082 | 119.2 |                                                                                                                                                                                                                                                                 | 102.7 | 91.9  | 88.9  | 85    | 107.8 | 108.4 | 110.2 | 139.1 |
| 160948620 | Dffb                                           | 344  | 39.4  | Apoptosis                                                                                                                                                                                                                                                       | 114.2 | 111.7 | 109.8 | 117.4 | 100.9 | 91.2  | 86.6  | 89.4  |
| 133778955 | H2-D1                                          | 362  | 40.8  | Endocytosis; Herpes simplex infection; Allograft rejection; Epstein-Barr virus infection; Cell adhesion molecules (CAMs); HTLV-I infection; Phagosome; Graft-versus-host disease; Viral myocarditis; Antigen processing and presentation: Type I diabetes melli | 102.3 | 99.2  | 97.3  | 95.8  | 93.8  | 99.4  | 94.9  | 97.4  |
| 10181116  | Mrps31                                         | 384  | 43.9  |                                                                                                                                                                                                                                                                 | 99.7  | 101.3 | 91.5  | 90.8  | 118.6 | 122.4 | 91.1  | 89.3  |
| 47059143  | Ccdc124                                        | 217  | 25.3  |                                                                                                                                                                                                                                                                 | 106.3 | 104.1 | 98.6  | 99.9  | 94.9  | 91.5  | 106.4 | 106.7 |
| 153791768 | Ints7                                          | 966  | 106.8 |                                                                                                                                                                                                                                                                 | 92.9  | 95.6  | 88    | 84.6  | 113.6 | 113.4 | 108.6 | 108.1 |
| 28559037  | Gimap1                                         | 300  | 33.3  |                                                                                                                                                                                                                                                                 | 90.3  | 91.2  | 105.6 | 105.6 | 103.5 | 104.5 | 99.2  | 90.1  |
| 62632754  | Atp11b                                         | 1175 | 133.5 |                                                                                                                                                                                                                                                                 | 101.9 | 100.9 | 101.2 | 96.2  | 101.4 | 98.3  | 97.6  | 85.5  |
| 377837104 | LOC1008<br>62433;<br>LOC1005<br>05015          | 165  | 18.4  | Ribosome                                                                                                                                                                                                                                                        | 81.9  | 85    | 90.5  | 94.1  | 115.6 | 114.2 | 117.2 | 114.7 |
| 160707961 | Ap1g2                                          | 791  | 87.8  | Lysosome                                                                                                                                                                                                                                                        | 142.6 | 108.3 | 100.6 | 105.5 | 92.4  | 107.1 | 93.5  | 90.6  |
| 254675193 | Ddx31                                          | 687  | 76.9  |                                                                                                                                                                                                                                                                 | 100   | 100.1 | 96.7  | 95.7  | 107.2 | 105.8 | 101.1 | 95.5  |

|           |                                                 |      |       |                                                                                                                                                                                                                                                                  |       |       |       |       |       |       |       |       |
|-----------|-------------------------------------------------|------|-------|------------------------------------------------------------------------------------------------------------------------------------------------------------------------------------------------------------------------------------------------------------------|-------|-------|-------|-------|-------|-------|-------|-------|
| 125656173 | Acaca                                           | 2345 | 265.1 | Fatty acid metabolism; Pyruvate metabolism; Insulin signaling pathway; Metabolic pathways; Propanoate metabolism; AMPK signaling pathway; Fatty acid biosynthesis; Glucagon signaling pathway                                                                    | 100.2 | 92.4  | 85.4  | 79.2  | 113.7 | 119.3 | 106.8 | 115.2 |
| 37537520  | Mrto4                                           | 238  | 27.4  |                                                                                                                                                                                                                                                                  | 92.2  | 92.2  | 92    | 98.3  | 118   | 122.2 | 114.5 | 111.4 |
| 19526814  | Ndufv1                                          | 464  | 50.8  | Metabolic pathways; Huntington's disease; Non-alcoholic fatty liver disease (NAFLD); Oxidative phosphorylation; Parkinson's disease; Alzheimer's disease                                                                                                         | 100.1 | 99.8  | 106.1 | 106.8 | 96.4  | 99    | 100.7 | 99.8  |
| 6755578   | Smarb1                                          | 385  | 44.1  |                                                                                                                                                                                                                                                                  | 102.4 | 105.6 | 103.7 | 104.6 | 104.6 | 103.8 | 95    | 94.3  |
| 39930415  | Ilkap                                           | 392  | 42.7  |                                                                                                                                                                                                                                                                  | 102.4 | 106.2 | 103.8 | 100.6 | 94.1  | 91.7  | 90.5  | 92.3  |
| 29336059  | Polr2c                                          | 275  | 31.4  | RNA polymerase; Epstein-Barr virus infection; Metabolic pathways; Purine metabolism; Huntington's disease; Pyrimidine metabolism                                                                                                                                 | 99.7  | 95.7  | 100.8 | 105   | 99.7  | 102.7 | 95.8  | 94.9  |
| 21362343  | Thyn1                                           | 226  | 26.2  |                                                                                                                                                                                                                                                                  | 107.7 | 110.1 | 104.4 | 104.4 | 94.5  | 89.6  | 99.2  | 101.8 |
| 122939192 | Clta                                            | 218  | 23.6  | Endocytosis; Endocrine and other factor-regulated calcium reabsorption; Lysosome; Huntington's disease; Synaptic vesicle cycle; Bacterial invasion of epithelial cells                                                                                           | 96.6  | 98.2  | 86    | 85.5  | 102.5 | 106.4 | 120.3 | 120.7 |
| 161086893 | Cab39                                           | 341  | 39.8  | mTOR signaling pathway; AMPK signaling pathway                                                                                                                                                                                                                   | 102.3 | 99.4  | 100   | 101.8 | 95.8  | 94.1  | 111   | 112.7 |
| 31541909  | Isoc1                                           | 297  | 32    |                                                                                                                                                                                                                                                                  | 104.8 | 111   | 109.6 | 110.2 | 90.8  | 103.1 | 107.2 | 91.8  |
| 19263322  | Wdr77                                           | 342  | 36.9  |                                                                                                                                                                                                                                                                  | 91.8  | 94.6  | 97    | 92.3  | 107.2 | 110.8 | 118.2 | 98.9  |
| 22122615  | Actr1b                                          | 376  | 42.3  |                                                                                                                                                                                                                                                                  | 97.4  | 100.8 | 104.5 | 93.7  | 107.3 | 95.5  | 101.9 | 105.3 |
| 124249335 | Tex10                                           | 928  | 105.1 |                                                                                                                                                                                                                                                                  | 105.1 | 96.8  | 103.6 | 129   | 114.5 | 134.5 | 93.9  | 76.1  |
| 140969817 | Bptf                                            | 2921 | 321.4 |                                                                                                                                                                                                                                                                  | 101.4 | 99.8  | 102.4 | 97.3  | 95    | 101.6 | 107.2 | 105.8 |
| 33859600  | Ppm1b                                           | 390  | 42.8  | MAPK signaling pathway                                                                                                                                                                                                                                           | 107.9 | 103.9 | 96.5  | 94.7  | 108.2 | 94.2  | 87.8  | 70.5  |
| 418203928 | Dnmt3a                                          | 908  | 101.6 | MicroRNAs in cancer; Metabolic pathways; Cysteine and methionine metabolism                                                                                                                                                                                      | 73.4  | 67.9  | 67.4  | 72.9  | 144.3 | 136.5 | 148.8 | 139.2 |
| 10946800  | Stx6                                            | 255  | 29    | SNARE interactions in vesicular transport                                                                                                                                                                                                                        | 91.2  | 89.8  | 82.4  | 84.3  | 117.9 | 117.1 | 121.1 | 115.1 |
| 205360909 | Irgm2                                           | 395  | 45.2  |                                                                                                                                                                                                                                                                  | 88.3  |       | 74    |       | 127.3 |       | 116.8 |       |
| 22094081  | Map2k3                                          | 347  | 39.3  | MAPK signaling pathway; Amyotrophic lateral sclerosis (ALS); TNF signaling pathway; Toxoplasmosis; Epstein-Barr virus infection; Toll-like receptor signaling pathway; Rap1 signaling pathway; Influenza A; GnRH signaling pathway; Epsilon RI signaling pathway | 96.3  | 98.1  | 89.4  | 93.6  | 111.2 | 110.2 | 111.6 | 110.5 |
| 29611663  | Exosc4                                          | 245  | 26.2  | RNA degradation                                                                                                                                                                                                                                                  | 108.1 | 104.9 | 93.3  | 99.1  | 104.5 | 101.7 | 80.2  | 86.5  |
| 167931392 | 9930111J<br>21Rik1                              | 844  | 95.5  |                                                                                                                                                                                                                                                                  | 98.2  | 101.3 | 97.5  | 101.5 | 92.6  | 89.1  | 87.9  | 97    |
| 157952206 | Bag1                                            | 355  | 39.7  | Protein processing in endoplasmic reticulum                                                                                                                                                                                                                      | 113.8 | 109.3 | 109.3 | 103.8 | 91.6  | 86.8  | 99.8  | 92.5  |
| 31981310  | Bcap31                                          | 245  | 27.9  | Protein processing in endoplasmic reticulum                                                                                                                                                                                                                      | 98.3  | 102.6 | 93.1  | 95    | 93.4  | 98.5  | 95.2  | 92.3  |
| 149251053 | Atp5o;<br>LOC1000<br>47429;<br>LOC1026<br>41678 | 213  | 23.3  | Metabolic pathways; Huntington's disease; Oxidative phosphorylation; Parkinson's disease; Alzheimer's disease                                                                                                                                                    | 95    | 96.7  | 96.7  | 97.7  | 101.5 | 100.5 | 104.8 | 103.3 |

|           |                                                    |      |       |                                                                                                                                                                                                         |       |       |       |       |       |       |       |       |
|-----------|----------------------------------------------------|------|-------|---------------------------------------------------------------------------------------------------------------------------------------------------------------------------------------------------------|-------|-------|-------|-------|-------|-------|-------|-------|
| 224967092 | Polr1b                                             | 1135 | 128.1 | RNA polymerase; Metabolic pathways; Purine metabolism; Pyrimidine metabolism                                                                                                                            | 91.7  | 90.6  | 99.2  | 94.7  | 117   | 120.2 | 99.8  | 102.1 |
| 13385268  | Cyb5;<br>Cyb5a                                     | 134  | 15.2  |                                                                                                                                                                                                         | 97.8  | 97.6  | 88.9  | 95.2  | 111.4 | 115.7 | 103.8 | 96    |
| 124487057 | Ermp1                                              | 898  | 100.1 |                                                                                                                                                                                                         | 111.2 | 105.2 | 101.6 | 103.4 | 99.1  | 99    | 94.1  | 93    |
| 34419622  | Pabpc4                                             | 660  | 72.2  | mRNA surveillance pathway; RNA degradation; RNA transport                                                                                                                                               | 72.1  | 70.4  | 70.3  | 69.5  | 143.3 | 136.4 | 145.5 | 149.2 |
| 22095003  | Sf3a3                                              | 501  | 58.8  | Spliceosome                                                                                                                                                                                             | 106   | 102.7 | 96.6  | 93.4  | 96    | 97.9  | 90    | 97.5  |
| 90991704  | Lrch1                                              | 709  | 79    |                                                                                                                                                                                                         | 99.2  | 97.8  | 99.2  | 94.5  | 104.5 | 103.8 | 106.1 | 105.4 |
| 288541337 | Aimp2                                              | 320  | 35.4  |                                                                                                                                                                                                         | 93    | 91.8  | 94.7  | 90.7  | 110.4 | 108.6 | 92    | 106.3 |
| 6678800   | Map4k2                                             | 821  | 91.2  | MAPK signaling pathway                                                                                                                                                                                  | 105.1 | 108   | 105.8 | 106.4 | 106.1 | 95.1  | 97.2  | 89.5  |
| 407264603 | Fhl1;<br>LOC1008<br>62446;<br>Gm10116;<br>Fhl1-ps1 | 183  | 20.8  | Mineral absorption                                                                                                                                                                                      | 118.9 | 143   | 114.2 | 119.7 | 93.6  | 97    | 98.5  | 95    |
| 225543185 | Vwa5a                                              | 793  | 87.1  |                                                                                                                                                                                                         | 106.9 | 107.7 | 100.7 | 103.1 | 95.4  | 94    | 99.2  | 96.4  |
| 6680309   | Hspe1                                              | 102  | 11    |                                                                                                                                                                                                         | 94.9  | 94.8  | 101.1 | 101   | 120.9 | 120.5 | 124.1 | 122.6 |
| 7305581   | Timm13                                             | 95   | 10.5  |                                                                                                                                                                                                         | 123   | 113.1 | 107.3 | 102.7 | 96.6  | 99.2  | 93.4  | 101   |
| 238624156 | Nle1                                               | 485  | 53.1  |                                                                                                                                                                                                         | 100.5 | 101.7 | 97.4  | 94.5  | 94.9  | 102.9 | 108.8 | 103.9 |
| 16716495  | Ric8;<br>Ric8a                                     | 530  | 59.8  |                                                                                                                                                                                                         | 113.2 | 115   | 104.9 | 94.3  | 91.3  | 100.9 | 100.8 | 103.6 |
| 31982028  | Rsu1                                               | 277  | 31.4  |                                                                                                                                                                                                         | 126.4 | 104.8 | 98.7  | 105.3 | 89.7  | 93.9  | 90.7  | 86.1  |
| 227908790 | Unc45a                                             | 944  | 103.4 |                                                                                                                                                                                                         | 107   | 109.8 | 90.8  | 94.6  | 106.6 | 104.9 | 104.6 | 100.1 |
| 21729757  | 1810009N<br>02Rik                                  | 233  | 25.1  |                                                                                                                                                                                                         | 112.1 | 106.9 | 95.4  | 108.4 | 90.7  | 101.4 | 98.7  | 90.5  |
| 13385806  | Lsm3                                               | 102  | 11.8  | RNA degradation; Spliceosome                                                                                                                                                                            | 123.4 | 121.1 | 95.9  | 95.6  | 92.1  | 78.7  | 98    | 85.4  |
| 34328334  | Acox3                                              | 700  | 78.4  | PPAR signaling pathway; Fatty acid metabolism; Metabolic pathways; Fatty acid degradation; alpha-Linolenic acid metabolism; cAMP signaling pathway; Biosynthesis of unsaturated fatty acids; Peroxisome | 109.8 | 99.3  | 98.7  | 85.6  | 94.6  | 92.1  | 90.4  | 100.8 |
| 188219597 | Rfc1                                               | 1131 | 125.9 | DNA replication, nucleotide excision repair, mismatch repair                                                                                                                                            | 91.6  | 97.7  | 92.6  | 92.7  | 117.9 | 114.5 | 109   | 106.2 |
| 7106301   | Mapre1                                             | 268  | 30    |                                                                                                                                                                                                         | 100.9 | 99.7  | 99.3  | 99.1  | 93.2  | 94    | 93.3  | 102.7 |
| 153792526 | Arl1                                               | 181  | 20.4  |                                                                                                                                                                                                         | 91.3  | 94.6  | 90.9  | 93    | 106.9 | 111.3 | 116.4 | 106.6 |
| 26080416  | Lpxn                                               | 386  | 43.5  |                                                                                                                                                                                                         | 113.5 | 111.2 | 99.8  | 102.4 | 83.9  | 86.9  | 97.2  | 97.6  |
| 124487035 | Phip                                               | 1821 | 206.6 |                                                                                                                                                                                                         | 104.4 | 102.3 | 103.4 | 108.2 | 101.2 | 103.4 | 106.6 | 95.4  |
| 10946870  | Akr1a1                                             | 325  | 36.6  | Metabolic pathways; Glycolysis / Gluconeogenesis; Glycerolipid metabolism; Pentose and glucuronate interconversions                                                                                     | 112.1 | 116.8 | 114.7 | 113.5 | 86.1  | 82.4  | 91.2  | 89.1  |
| 42734351  | Senp7                                              | 1037 | 116.3 |                                                                                                                                                                                                         | 111.1 | 115.5 | 105.9 | 102.1 | 90.4  | 83.3  | 94.4  | 89.8  |
| 33563260  | Agfgl                                              | 559  | 57.9  | Influenza A                                                                                                                                                                                             | 93.2  | 93.6  | 88    | 89.4  | 106   | 109   | 117.3 | 111.3 |
| 6680840   | Calu                                               | 315  | 37    |                                                                                                                                                                                                         | 63.9  | 66    | 118.1 | 119.2 | 153.2 | 150.2 | 104.4 | 106.7 |

|           |                       |      |       |                                                                                                                                                                                                       |       |       |       |       |       |       |       |       |
|-----------|-----------------------|------|-------|-------------------------------------------------------------------------------------------------------------------------------------------------------------------------------------------------------|-------|-------|-------|-------|-------|-------|-------|-------|
| 13386106  | Nudt21                | 227  | 26.2  | mRNA surveillance pathway                                                                                                                                                                             | 102   | 100.9 | 101.5 | 102.7 | 97.4  | 98.4  | 98.8  | 97.9  |
| 114205431 | Abce1                 | 599  | 67.3  |                                                                                                                                                                                                       | 96.1  | 101.1 | 94.1  | 97    | 105.1 | 102.9 | 105.9 | 107.7 |
| 159032056 | Lsm4                  | 138  | 15.2  | RNA degradation; Spliceosome                                                                                                                                                                          | 111.4 | 107.7 | 100.6 | 102.6 | 85.5  | 89.1  | 94.4  | 94.7  |
| 6753488   | Cops3                 | 423  | 47.8  |                                                                                                                                                                                                       | 102.3 | 96.3  | 96.6  | 92.8  | 98.5  | 103.5 | 80.8  | 98.3  |
| 13385942  | Cs                    | 464  | 51.7  | Citrate cycle (TCA cycle); Metabolic pathways; Biosynthesis of amino acids; 2-Oxocarboxylic acid metabolism; Carbon metabolism; Glyoxylate and mRNA surveillance pathway; Dopaminergic synapse;       | 106.1 | 105.8 | 99.4  | 99.7  | 93.9  | 96.9  | 98.6  | 99.1  |
| 33942059  | Ppp2r5d               | 594  | 69    | Oocyte meiosis; Sphingolipid signaling pathway; PI3K-Akt signaling pathway; AMPK signaling pathway; Adrenergic signaling in cardiomyocytes                                                            | 104.3 | 104.3 | 94.8  | 91.6  | 105   | 109   | 103   | 106.1 |
| 21313476  | Sar1b                 | 198  | 22.4  | Legionellosis; Protein processing in endoplasmic reticulum                                                                                                                                            | 92.9  | 96.2  | 94.5  | 97.9  | 103.9 | 112.3 | 110   | 110.2 |
| 31542438  | Cyb5b                 | 146  | 16.3  |                                                                                                                                                                                                       | 126.8 | 146.3 | 91.9  | 90.5  | 100.6 | 99.5  | 99.3  | 100.8 |
| 33859662  | Vat1                  | 406  | 43.1  |                                                                                                                                                                                                       | 90.9  | 93    | 92.8  | 93.4  | 103.5 | 111   | 110.2 | 105.7 |
| 160333476 | Cdk17                 | 523  | 59.5  |                                                                                                                                                                                                       | 98.7  | 93.2  | 99    | 103.9 | 111.2 | 119.2 | 93.5  | 90    |
| 9789913   | Copz1                 | 177  | 20.2  |                                                                                                                                                                                                       | 101   | 101   | 95.2  | 94.8  | 101.3 | 96.2  | 102.4 | 103.5 |
| 11230770  | Eed                   | 441  | 50.2  |                                                                                                                                                                                                       | 94.5  | 95.7  | 100.1 | 101.2 | 107.2 | 105.9 | 106.2 | 103   |
| 261824000 | Psm3                  | 255  | 28.4  | Proteasome                                                                                                                                                                                            | 90.3  | 91.2  | 108.6 | 104   | 118.3 | 113.9 | 94.1  | 95.9  |
| 30794378  | Exosc6                | 273  | 28.4  | RNA degradation                                                                                                                                                                                       | 109.3 | 105.7 | 98.6  | 99.2  | 100.2 | 96.2  | 101   | 100.4 |
| 407263189 | LOC101056102; Gm29779 | 399  | 43.4  |                                                                                                                                                                                                       | 75.6  | 70.9  | 97.9  | 106.4 | 110.4 | 107.6 | 110.3 | 107.4 |
| 19527242  | Tubg1                 | 451  | 51.1  |                                                                                                                                                                                                       | 105.8 | 103.5 | 102.8 | 105.3 | 109.5 | 107.1 | 92.3  | 87.9  |
| 71274162  | Urb2                  | 1524 | 171.5 |                                                                                                                                                                                                       | 96.2  | 99.7  | 90.1  | 88.6  | 115.5 | 110.1 | 104.7 | 107.4 |
| 254675270 | Rps5                  | 204  | 22.9  | Ribosome                                                                                                                                                                                              | 94.4  | 93.7  | 95.1  | 102.7 | 108.6 | 105.4 | 111.8 | 109.1 |
| 125347396 | Smardc1               | 515  | 58.2  |                                                                                                                                                                                                       | 106.8 | 110.7 | 94.6  | 97.4  | 103.5 | 99.1  | 96.4  | 93.8  |
| 225007593 | Hmox2                 | 315  | 35.7  | Mineral absorption; Porphyrin and chlorophyll metabolism                                                                                                                                              | 101.9 | 104   | 100.5 | 99.7  | 98.4  | 100.5 | 100.5 | 100.6 |
| 14149750  | Arl6ip5               | 188  | 21.5  |                                                                                                                                                                                                       | 103.9 | 106.5 | 97.2  | 94    | 95.8  | 99.6  | 85.4  | 81.1  |
| 111038118 | Hadh                  | 314  | 34.4  | Fatty acid metabolism; Tryptophan metabolism; Valine, leucine and isoleucine degradation; Metabolic pathways; Lysine degradation; Fatty acid degradation; Butanoate metabolism; Fatty acid elongation | 105.7 | 107.1 | 105.4 | 105.5 | 92.8  | 92.5  | 97.8  | 96.6  |
| 6679445   | Ppox                  | 477  | 50.8  | Metabolic pathways; Porphyrin and chlorophyll metabolism                                                                                                                                              | 114.9 | 108.7 | 98.2  | 98.2  | 101.3 | 99    | 97    | 97.7  |
| 31981560  | Smad2                 | 428  | 46.5  | Endocytosis                                                                                                                                                                                           | 111.2 | 111.3 | 102.7 | 101.8 | 99.3  | 99.8  | 95.6  | 99.3  |
| 224809384 | Mki67ip; Nifk         | 317  | 36.2  |                                                                                                                                                                                                       | 84.7  | 84.9  | 92.6  | 91.7  | 118.1 | 121.5 | 111.7 | 111.4 |
| 33695123  | Cdk11b                | 784  | 91.5  |                                                                                                                                                                                                       | 93.6  | 99.2  | 101.3 | 101.5 | 108.8 | 101.2 | 98.5  | 95.1  |
| 6678055   | Snrpd1                | 119  | 13.3  | Spliceosome; Systemic lupus erythematosus                                                                                                                                                             | 93.6  | 100.2 | 101.2 | 98    | 112.4 | 105.9 | 87.9  | 83.9  |
| 40538825  | Ddx51                 | 639  | 70.3  |                                                                                                                                                                                                       | 94.3  | 92.6  | 88.2  | 91.7  | 116.5 | 103.5 | 115.9 | 111.2 |
| 241982696 | Aaas                  | 546  | 59.4  | RNA transport                                                                                                                                                                                         | 100.3 | 95.9  | 101.6 | 100.8 | 105.4 | 97.9  | 98    | 105.6 |

|           |         |      |       |                                                                                                                                                                                                                                                                 |       |       |       |       |       |       |       |       |
|-----------|---------|------|-------|-----------------------------------------------------------------------------------------------------------------------------------------------------------------------------------------------------------------------------------------------------------------|-------|-------|-------|-------|-------|-------|-------|-------|
| 6680193   | Hdac1   | 482  | 55    | Epstein-Barr virus infection; Amphetamine addiction; Huntington's disease; Transcriptional misregulation in cancer; Notch signaling pathway; Thyroid hormone signaling pathway; Cell cycle; Pathways in cancer; Alcoholism; Viral carcinogenesis; Chronic myelo | 106.6 | 92.4  | 99.9  | 104   | 92    | 95.6  | 99.2  | 101.5 |
| 13385652  | Rps20   | 119  | 13.4  | Ribosome                                                                                                                                                                                                                                                        | 84.6  | 88.1  | 95.1  | 94.5  | 108.9 | 109.4 | 101.9 | 105.4 |
| 9790109   | Prmt1   | 371  | 42.4  | FoxO signaling pathway; Glucagon signaling pathway                                                                                                                                                                                                              | 93.1  | 87.7  | 90.7  | 87.9  | 112.3 | 113.6 | 84.7  | 95.3  |
| 92110037  | Prrc2a  | 2158 | 229.1 |                                                                                                                                                                                                                                                                 | 96.7  | 87.7  | 91.7  | 80.2  | 105   | 113.1 | 111.1 | 127.2 |
| 169234938 | Abcb7   | 752  | 82.5  | ABC transporters                                                                                                                                                                                                                                                | 95.1  | 95.3  | 99.8  | 101.2 | 113.2 | 109.1 | 99.3  | 101.5 |
| 31560083  | Fam192a | 254  | 28.7  |                                                                                                                                                                                                                                                                 | 103.3 | 102.2 | 100.6 | 101.6 | 96.5  | 98.7  | 106   | 115.3 |
| 256985188 | Polr1a  | 1717 | 194   | RNA polymerase; Metabolic pathways; Purine metabolism; Pyrimidine metabolism                                                                                                                                                                                    | 98    | 96.2  | 96.8  | 99.9  | 114.5 | 109.6 | 109.5 | 112.6 |
| 144922638 | Ktn1    | 1327 | 152.4 |                                                                                                                                                                                                                                                                 | 89.4  | 83.5  | 76.9  | 80.1  | 134.9 | 132.8 | 113.2 | 129.5 |
| 19527346  | Gpsm3   | 159  | 17.6  |                                                                                                                                                                                                                                                                 | 119.9 | 104.5 | 112.8 | 104.8 | 85.1  | 96.1  | 84.8  | 92.6  |
| 30725776  | Utp15   | 528  | 59.3  | Ribosome biogenesis in eukaryotes                                                                                                                                                                                                                               | 89.5  | 84.6  | 89.8  | 87.9  | 114.9 | 115.5 | 109.3 | 115.2 |
| 6679110   | Npm3    | 175  | 19    |                                                                                                                                                                                                                                                                 | 97.2  | 99.1  | 99.2  | 101.5 | 121.9 | 117.5 | 54.3  | 73.3  |
| 56744242  | Ap1g1   | 825  | 91.7  |                                                                                                                                                                                                                                                                 | 105.4 | 109   | 101.5 | 95.7  | 95.4  | 102.2 | 89.3  | 86.5  |
| 23956234  | Prkab1  | 270  | 30.3  | Oxytocin signaling pathway; FoxO signaling pathway; Hypertrophic cardiomyopathy (HCM); Insulin signaling pathway; Insulin resistance; Circadian rhythm; Longevity regulating pathway; Non-alcoholic fatty liver disease (NAFLD); Adipocytokine signaling pathwa | 106   | 105.7 | 114   | 105.9 | 84.2  | 87    | 78.7  | 95.1  |
| 356995947 | Ppil2   | 521  | 59    | Ubiquitin mediated proteolysis                                                                                                                                                                                                                                  | 99.3  | 102.2 | 95.7  | 100.2 | 104.4 | 101.2 | 97.5  | 98.5  |
| 7305061   | Fkbp3   | 224  | 25.1  |                                                                                                                                                                                                                                                                 | 116.9 | 112   | 116.3 | 115.3 | 87.2  | 89.3  | 99.9  | 101   |
| 209862923 | Crmp1   | 686  | 74.2  |                                                                                                                                                                                                                                                                 | 112.1 | 107.7 | 89.1  | 85.4  | 84.7  | 89    | 103.9 | 96.8  |
| 34328474  | Lbh     | 105  | 12.1  |                                                                                                                                                                                                                                                                 | 123.8 | 129.9 | 121.2 | 116.2 | 81.9  | 76    | 86.1  | 84.8  |
| 85861231  | Hdhd2   | 259  | 28.7  |                                                                                                                                                                                                                                                                 | 110.4 | 117.4 | 98.9  | 103.7 | 92.7  | 86.3  | 92.8  | 90.4  |
| 153792001 | Ranbp1  | 203  | 23.6  | HTLV-I infection; Viral carcinogenesis                                                                                                                                                                                                                          | 86.4  | 88    | 86.8  | 85.9  | 106   | 105.9 | 128.3 | 127.2 |
| 443497959 | Aip     | 330  | 37.6  |                                                                                                                                                                                                                                                                 | 105.9 | 101.8 | 103.3 | 102   | 92.2  | 90.9  | 96.6  | 100.5 |
| 23943828  | Bcl2l13 | 434  | 46.7  | Legionellosis                                                                                                                                                                                                                                                   | 112.7 | 109.7 | 93.2  | 95.2  | 103.4 | 99.2  | 112.8 | 110.5 |
| 6753498   | Cox4i1  | 169  | 19.5  | Metabolic pathways; Huntington's disease; Non-alcoholic fatty liver disease (NAFLD); Oxidative phosphorylation; Parkinson's disease; Alzheimer's disease; Cardiac muscle contraction                                                                            | 109.9 | 105.1 | 101.8 | 106   | 89.9  | 91.3  | 87.5  | 88.1  |
| 7305143   | Hk2     | 917  | 102.5 | Neomycin, kanamycin and gentamicin biosynthesis; Type II diabetes mellitus; Carbohydrate digestion and absorption; Insulin signaling pathway; Metabolic pathways; Amino sugar and nucleotide sugar metabolism; Starch and sucrose metabolism; Glycolysis / Gluc | 61.4  | 60.8  | 56.4  | 55.6  | 154.8 | 160.2 | 151.9 | 143.4 |
| 225735647 | Fam49a  | 323  | 37.3  |                                                                                                                                                                                                                                                                 | 111.1 | 113.7 | 107.5 | 113.6 | 92.7  | 84.1  | 92.3  | 81.3  |
| 6678215   | Taf6    | 678  | 72.6  | Herpes simplex infection; Basal transcription factors                                                                                                                                                                                                           | 111.7 | 117   | 91.4  | 93.4  | 88.8  | 93.9  | 103.6 | 97.7  |
| 29789050  | Abcf3   | 709  | 79.8  |                                                                                                                                                                                                                                                                 | 99.8  | 93.2  | 100.3 | 98.3  | 103.6 | 98.7  | 102   | 104.5 |

|           |                                      |      |       |                                                                                                                                                                                                                                                                             |       |       |       |       |       |       |       |       |
|-----------|--------------------------------------|------|-------|-----------------------------------------------------------------------------------------------------------------------------------------------------------------------------------------------------------------------------------------------------------------------------|-------|-------|-------|-------|-------|-------|-------|-------|
| 40789301  | Heatr3                               | 679  | 74.3  |                                                                                                                                                                                                                                                                             | 78.4  | 75.2  | 72.9  | 74.8  | 132.1 | 130.4 | 134.7 | 137.6 |
| 40538842  | Pde12                                | 608  | 67.5  |                                                                                                                                                                                                                                                                             | 100.7 | 97.8  | 91    | 103.7 | 99.3  | 112.7 | 108.8 | 94.2  |
| 309262615 | Mcgl10380<br>69;<br>LOC1026<br>42334 | 203  | 22.7  |                                                                                                                                                                                                                                                                             | 113.6 | 115   | 111.6 | 110.2 | 84.3  | 84.9  | 94.5  | 91.6  |
| 70906470  | Pus1                                 | 423  | 47.5  |                                                                                                                                                                                                                                                                             | 101.7 | 100.5 | 99.7  | 92.7  | 111   | 103.2 | 99.4  | 108.7 |
| 31980626  | Rgs14                                | 547  | 59.8  | Rap1 signaling pathway                                                                                                                                                                                                                                                      | 105.3 | 96.4  | 97.4  | 92.2  | 95.5  | 96.9  | 91.3  | 98.2  |
| 33469980  | Ptcd3                                | 685  | 77.7  |                                                                                                                                                                                                                                                                             | 96.3  | 100.1 | 96.4  | 113.7 | 109   | 115.8 | 113.4 | 93.4  |
| 326368244 | Brd2                                 | 798  | 88    |                                                                                                                                                                                                                                                                             | 103.9 | 108.5 | 104.3 | 109   | 106.4 | 105.7 | 77    | 73.6  |
| 6679803   | Fkbp1a                               | 108  | 11.9  |                                                                                                                                                                                                                                                                             | 120.9 | 139.5 | 107.5 | 108   | 90.4  | 92.5  | 96.7  | 101.7 |
| 358248329 | Dhx30                                | 1223 | 136.4 |                                                                                                                                                                                                                                                                             | 101.9 | 113.2 | 97.5  | 96    | 102.7 | 105.8 | 104.1 | 100.3 |
| 31543511  | Prkch                                | 683  | 77.9  | Vascular smooth muscle contraction; Tight junction;<br>Inflammatory mediator regulation of TRP channels                                                                                                                                                                     | 93.5  | 108.1 | 98.6  | 91.9  | 99.4  | 92.9  | 103.7 | 98.8  |
| 210147426 | Tom1                                 | 516  | 57.1  |                                                                                                                                                                                                                                                                             | 103   | 110.8 | 106.9 | 114   | 96.5  | 91.9  | 101.3 | 90.9  |
| 339895909 | Adk                                  | 345  | 38.4  |                                                                                                                                                                                                                                                                             | 97.2  | 94.6  | 102   | 99.6  | 96    | 96.7  | 100.5 | 100.7 |
| 6679809   | Flot1                                | 428  | 47.5  | Insulin signaling pathway                                                                                                                                                                                                                                                   | 104.2 | 110.9 | 97.7  | 97.7  | 98.3  | 100.5 | 102.3 | 99.4  |
| 110347535 | Hnrp11;<br>Hnrp11                    | 591  | 64.1  |                                                                                                                                                                                                                                                                             | 98.4  | 102.2 | 99.5  | 100.6 | 95    | 90.3  | 104.9 | 102.5 |
| 297747288 | H2-Ke2;<br>Pfdn6                     | 127  | 14.4  |                                                                                                                                                                                                                                                                             | 93.4  | 96.7  | 93.1  | 87.8  | 103.8 | 102   | 128.1 | 128.8 |
| 158749640 | Preb                                 | 417  | 45.4  | Protein processing in endoplasmic reticulum                                                                                                                                                                                                                                 | 99.9  | 99.7  | 91.8  | 100.1 | 105.8 | 110.4 | 94.3  | 82.6  |
| 149260287 | LOC1000<br>45999;<br>Ran;<br>LOC1026 | 216  | 24.4  | Epstein-Barr virus infection; HTLV-I infection; Ribosome<br>biogenesis in eukaryotes; RNA transport                                                                                                                                                                         | 102.1 | 107.6 | 118.5 | 117   | 89.4  | 87    | 84.5  | 81.4  |
| 7305519   | Irf4                                 | 450  | 51.5  |                                                                                                                                                                                                                                                                             | 48    | 55    | 48.4  | 55.7  | 165.6 | 151.6 | 152.8 | 153.4 |
| 60593032  | Itp2                                 | 2701 | 307.3 | Oxytocin signaling pathway; Cholinergic synapse;<br>Retrograde endocannabinoid signaling; Pancreatic<br>secretion; Dopaminergic synapse; NOD-like receptor<br>signaling pathway; Long-term potentiation; Platelet<br>activation; Thyroid hormone synthesis; Oocyte meiosis; | 105.6 | 112.8 | 106.2 | 91.5  | 96.4  | 102.2 | 86.9  | 97.6  |
| 37718983  | Rab35                                | 201  | 23    | Endocytosis                                                                                                                                                                                                                                                                 | 98.9  | 81.7  | 80.2  | 69.7  | 104.4 | 130.6 | 109.9 | 125.3 |
| 21312650  | Ddx56                                | 546  | 61.2  |                                                                                                                                                                                                                                                                             | 96.1  | 96.1  | 87.3  | 88.4  | 113.2 | 116   | 120.4 | 116.3 |
| 259155336 | Mia2                                 | 772  | 86.7  |                                                                                                                                                                                                                                                                             | 85.2  | 89.3  | 95.6  | 91.6  | 117.2 | 111.5 | 105.3 | 113   |
| 12963537  | Cwc15                                | 229  | 26.6  | Spliceosome                                                                                                                                                                                                                                                                 | 111.1 | 105.9 | 105.4 | 103.9 | 92.9  | 101.4 | 95.4  | 96.9  |
| 12746422  | Xpo7                                 | 1087 | 123.7 |                                                                                                                                                                                                                                                                             | 102.6 | 105.3 | 104.8 | 94.3  | 109.7 | 103.5 | 89.4  | 93.3  |
| 46402169  | Mrps26                               | 200  | 23.4  |                                                                                                                                                                                                                                                                             | 94.4  | 93.7  | 89.8  | 85.9  | 114.8 | 114.2 | 118.6 | 121.3 |
| 244790003 | Mpst                                 | 297  | 33.1  | Metabolic pathways; Sulfur relay system; Cysteine and<br>methionine metabolism; Sulfur metabolism                                                                                                                                                                           | 107.8 | 114.3 | 154.2 | 142.2 | 91.8  | 89    | 77    | 77.5  |
| 74315981  | Zranb2                               | 330  | 37.3  |                                                                                                                                                                                                                                                                             | 98.5  | 101.6 | 94.8  | 100.9 | 98.7  | 90.6  | 95.2  | 101.9 |
| 42794007  | Rbm34                                | 442  | 49.1  |                                                                                                                                                                                                                                                                             | 91.6  | 92.5  | 101   | 100   | 110.1 | 110.6 | 100.3 | 107   |



|           |                |      |       |                                                                                                                                                                                                                                                                 |       |       |       |       |       |       |       |       |
|-----------|----------------|------|-------|-----------------------------------------------------------------------------------------------------------------------------------------------------------------------------------------------------------------------------------------------------------------|-------|-------|-------|-------|-------|-------|-------|-------|
| 40254409  | Rnf31          | 1066 | 119.2 | NOD-like receptor signaling pathway                                                                                                                                                                                                                             | 101.4 | 108.8 | 112.8 | 108.9 | 109.4 | 107.6 | 95    | 87.7  |
| 88853581  | Ewsr1          | 655  | 68.4  | Transcriptional misregulation in cancer                                                                                                                                                                                                                         | 109.3 | 106.9 | 116.6 | 113.8 | 86    | 85.8  | 88.7  | 94.4  |
| 13385724  | Fgfr1op2       | 253  | 29.4  |                                                                                                                                                                                                                                                                 | 107.8 | 109.3 | 94.7  | 97.3  | 94.6  | 89.9  | 99.8  | 101.7 |
| 33468897  | Gclc           | 637  | 72.5  | Glutathione metabolism; Metabolic pathways; Cysteine and methionine metabolism                                                                                                                                                                                  | 110.2 | 104.7 | 97.3  | 99.6  | 97.9  | 98.2  | 100.2 | 101.2 |
| 6680129   | Thumpd3        | 505  | 56.4  |                                                                                                                                                                                                                                                                 | 95    | 95.9  | 93.2  | 94.6  | 109.6 | 108.4 | 107.1 | 104.2 |
| 71061470  | Lig3           | 1012 | 112.7 | Base excision repair                                                                                                                                                                                                                                            | 137.3 | 108.2 | 93.4  | 93.5  | 94.3  | 99.1  | 95.9  | 102.4 |
| 293651548 | Nfkb2          | 900  | 96.8  |                                                                                                                                                                                                                                                                 | 76.9  | 79.8  | 74.8  | 76.5  | 137.9 | 130.5 | 117   | 115.1 |
| 21426889  | Rps11          | 158  | 18.4  | Ribosome                                                                                                                                                                                                                                                        | 77.9  | 76    | 86.5  | 85.4  | 112.9 | 107.9 | 130.5 | 132.1 |
| 76880494  | Ube3a          | 870  | 99.8  | Ubiquitin mediated proteolysis; Viral carcinogenesis                                                                                                                                                                                                            | 93.3  | 88    | 98.8  | 99.9  | 111.9 | 114.6 | 95.5  | 97.2  |
| 56606027  | Nol10          | 687  | 80    |                                                                                                                                                                                                                                                                 | 97.8  | 101.4 | 87.5  | 87.4  | 110.9 | 109   | 115.3 | 114.2 |
| 148223079 | Wdr82          | 313  | 35.1  | mRNA surveillance pathway                                                                                                                                                                                                                                       | 107.3 | 110.7 | 107.3 | 106.9 | 92.2  | 95.6  | 81.5  | 74.2  |
| 40254361  | Hspa4l         | 838  | 94.3  | Protein processing in endoplasmic reticulum                                                                                                                                                                                                                     | 91.2  | 82.9  | 83.5  | 73.1  | 115.8 | 115   | 100.6 | 109.1 |
| 25141335  | Cpne3          | 533  | 59.5  |                                                                                                                                                                                                                                                                 | 105.1 | 103.5 | 99.9  | 100.4 | 98.2  | 99.2  | 96.7  | 97.1  |
| 258679484 | Ogfr           | 633  | 70.6  |                                                                                                                                                                                                                                                                 | 99.9  | 101.9 | 98.9  | 96.1  | 97.6  | 97    | 109   | 110.4 |
| 21703344  | Sar1a          | 198  | 22.4  | Legionellosis; Protein processing in endoplasmic reticulum                                                                                                                                                                                                      | 93.9  | 104.4 | 88.3  | 105.1 | 104.4 | 112.5 | 116.6 | 101.8 |
| 158533976 | Faf2           | 445  | 52.4  |                                                                                                                                                                                                                                                                 | 95.5  | 104.2 | 89.5  | 91.7  | 110.4 | 104   | 111.6 | 107   |
| 7305261   | Mbd3           | 285  | 32.1  |                                                                                                                                                                                                                                                                 | 86.7  | 95.3  | 86.6  | 85.2  | 126.7 | 118.6 | 113.9 | 113.6 |
| 114205428 | Rcn2           | 320  | 37.2  |                                                                                                                                                                                                                                                                 | 111.4 | 111.2 | 104.2 | 99.4  | 98.5  | 99.6  | 99    | 98.7  |
| 6753812   | Fadd           | 205  | 22.9  | Herpes simplex infection; Platinum drug resistance; Chagas disease (American trypanosomiasis); TNF signaling pathway; NOD-like receptor signaling pathway; RIG-I-like receptor signaling pathway; Tuberculosis; Hepatitis B; Apoptosis - multiple species; Toll | 139.1 | 126.6 | 106.6 | 102.8 | 80.7  | 73.8  | 78.3  | 77.4  |
| 254587962 | Pgam5          | 288  | 32    | TNF signaling pathway                                                                                                                                                                                                                                           | 100.7 | 102   | 99.9  | 93.8  | 106   | 106   | 115.7 | 109.2 |
| 31980791  | Plrg1          | 513  | 56.9  | Spliceosome                                                                                                                                                                                                                                                     | 99.3  | 104.4 | 103.4 | 102.7 | 101.9 | 102.8 | 91.1  | 86.2  |
| 31543694  | Sgpl1          | 568  | 63.6  | Metabolic pathways; Sphingolipid signaling pathway; Sphingolipid metabolism                                                                                                                                                                                     | 100   | 96    | 101.3 | 100.5 | 96.5  | 99.9  | 98.4  | 100.2 |
| 255003775 | Dus3l          | 637  | 71.1  |                                                                                                                                                                                                                                                                 | 105.4 | 106.6 | 122.3 | 105.3 | 102.1 | 93.9  | 89.2  | 101.1 |
| 27369870  | Gramd4         | 633  | 72.2  |                                                                                                                                                                                                                                                                 | 105.1 | 107.6 | 97.7  | 99.8  | 96.4  | 94.8  | 101.7 | 96.8  |
| 269308251 | Ankmy2         | 440  | 48.7  |                                                                                                                                                                                                                                                                 | 104   | 94.9  | 93.6  | 96.9  | 97.3  | 98.8  | 103.6 | 105.9 |
| 114326474 | Slc1a5         | 555  | 58.4  | Protein digestion and absorption; Central carbon metabolism in cancer                                                                                                                                                                                           | 41.5  | 43.6  | 34.9  | 35.5  | 179.9 | 171.3 | 171.3 | 172.9 |
| 257153354 | Sipa1          | 1038 | 112.2 | Leukocyte transendothelial migration; Kip1 signaling pathway                                                                                                                                                                                                    | 127.5 | 114.8 | 100.8 | 101   | 104   | 106.4 | 84.4  | 92.2  |
| 25141332  | Cpne1          | 536  | 58.8  |                                                                                                                                                                                                                                                                 | 103.3 | 105.6 | 92.8  | 94.8  | 87.9  | 90    | 90.6  | 91.5  |
| 226423907 | Cnp            | 420  | 47.1  |                                                                                                                                                                                                                                                                 | 97.9  | 94.7  | 112.3 | 120.7 | 94.1  | 103.4 | 87.3  | 84.4  |
| 13385728  | Mfap1a; Mfap1b | 439  | 51.9  |                                                                                                                                                                                                                                                                 | 105.8 | 106   | 98.6  | 107.2 | 106.4 | 107.9 | 99.3  | 93    |
| 10257421  | Cetn2          | 172  | 19.8  | Nucleotide excision repair                                                                                                                                                                                                                                      | 106.5 | 100.6 | 112   | 108.2 | 90.3  | 89.4  | 79.4  | 100.5 |
| 157841168 | Ccnk           | 582  | 64.3  |                                                                                                                                                                                                                                                                 | 102.1 | 101.5 | 107.7 | 107.7 | 116   | 122.4 | 97.2  | 98.7  |
| 262205333 | Dgkz           | 1123 | 125   |                                                                                                                                                                                                                                                                 | 88.8  | 101.1 | 100.2 | 102.5 | 144.6 | 114.3 | 84.7  | 90.2  |

|           |                                                                   |      |       |                                                                                                                              |       |       |       |       |       |       |       |       |
|-----------|-------------------------------------------------------------------|------|-------|------------------------------------------------------------------------------------------------------------------------------|-------|-------|-------|-------|-------|-------|-------|-------|
| 42475974  | Pik3c3                                                            | 887  | 101.4 | Metabolic pathways; Tuberculosis; Phagosome; Autophagy; Inositol phosphate metabolism; Phosphatidylinositol signaling system | 110   | 110   | 103.1 | 102.3 | 101.4 | 103.8 | 93.9  | 93    |
| 13385088  | Fam107b                                                           | 131  | 15.6  |                                                                                                                              | 125   | 122   | 118.7 | 118.6 | 76.1  | 79.6  | 94.1  | 89.3  |
| 238814331 | Cbfb                                                              | 187  | 22    |                                                                                                                              | 107.9 | 117.4 | 135.1 | 116.9 | 100.1 | 71.2  | 87.5  | 99.2  |
| 194328715 | Zfp207                                                            | 495  | 52.8  |                                                                                                                              | 116.7 | 111.7 | 105.5 | 102.2 | 103.3 | 101.1 | 78.9  | 78.8  |
| 94403170  | Gm9386                                                            | 176  | 19.8  |                                                                                                                              | 120   | 120.4 | 106.2 | 126.6 | 78.7  | 75.4  | 91.7  | 88    |
| 30794156  | Uba7                                                              | 977  | 108.6 | Ubiquitin mediated proteolysis; Parkinson's disease                                                                          | 112.2 | 100.4 | 118   | 111.2 | 87    | 105.5 | 84.1  | 84.8  |
| 30794438  | Aspsr1                                                            | 550  | 59.8  | Transcriptional misregulation in cancer                                                                                      | 100.2 | 100.9 | 96    | 95.9  | 94.4  | 95.8  | 94.9  | 95.2  |
| 407261373 | Ptges3;<br>Gm9769;<br>Ptges3-ps;<br>LOC100048119;<br>LOC102641464 | 160  | 18.7  | Metabolic pathways; Arachidonic acid metabolism                                                                              | 71.4  | 104.7 | 69.4  | 102.7 | 129.1 | 96.2  | 128.7 | 95.6  |
| 41282022  | Calu                                                              | 315  | 37.1  |                                                                                                                              | 93.3  | 92.8  | 96.8  | 94.7  | 116.9 | 115.3 | 96.3  | 111.9 |
| 226958440 | Qk                                                                | 341  | 37.6  |                                                                                                                              | 99.3  | 101.1 | 92.4  | 91.1  | 109.5 | 106.6 | 114.9 | 110.1 |
| 22122347  | Ggal                                                              | 635  | 69.9  | Lysosome                                                                                                                     | 106.1 | 99.8  | 100.8 | 95.7  | 89.1  | 95.7  | 100.5 | 97.9  |
| 241982745 | Fam129a                                                           | 926  | 102.6 |                                                                                                                              | 87.7  | 93.6  | 75.4  | 86.9  | 118.1 | 105.7 | 118.2 | 108.1 |
| 27369583  | Pus7l                                                             | 702  | 79.1  |                                                                                                                              | 107.5 | 103.3 | 94    | 100.1 | 93.7  | 96.9  | 99    | 96.3  |
| 158854020 | Echdc1                                                            | 322  | 35.4  | Propanoate metabolism                                                                                                        | 100.3 | 106.2 | 103.8 | 104.3 | 100.4 | 96.8  | 99.8  | 103.9 |
| 170650724 | Pepd                                                              | 493  | 55    |                                                                                                                              | 116.6 | 116.2 | 81.6  | 79.9  | 98.8  | 98.8  | 87.4  | 89.1  |
| 70778817  | Wdr6l                                                             | 305  | 33.8  | RNA degradation                                                                                                              | 90.2  | 97.4  | 97.7  | 98.7  | 102.9 | 98.6  | 95.5  | 102.6 |
| 226437608 | Gcfc1;<br>Paxbp1                                                  | 919  | 104.8 |                                                                                                                              | 95    | 100.6 | 97.4  | 101.8 | 101.5 | 95.9  | 102.6 | 109.7 |
| 17647499  | Hbb-b2                                                            | 147  | 15.9  | African trypanosomiasis; Malaria                                                                                             |       | 70.9  |       | 384.1 |       | 50.3  |       | 54.2  |
| 22507333  | Rbm5                                                              | 815  | 92.3  |                                                                                                                              | 114   | 114.4 | 98.4  | 100.8 | 97.4  | 100.3 | 102.3 | 101.7 |
| 37595742  | Zmym2                                                             | 1376 | 154.5 |                                                                                                                              | 100   | 101   | 101.2 | 98.8  | 101.4 | 99.9  | 98.9  | 95.8  |
| 6755186   | Cyth2                                                             | 400  | 46.5  | Endocytosis; Phospholipase D signaling pathway                                                                               | 89.2  | 96.9  | 81.7  | 75.4  | 104.5 | 105.7 | 121.5 | 115.7 |
| 6806917   | Gm2a                                                              | 193  | 20.8  | Lysosome                                                                                                                     | 114.8 | 116.1 | 101.7 | 106.9 | 82.3  | 81.9  | 93.5  | 91.4  |
| 309264544 | Srp14;<br>LOC100504988;<br>LOC102642637                           | 110  | 12.5  | Protein export                                                                                                               | 99.3  | 98.5  | 91.6  | 87.1  | 101.4 | 100.8 | 114.5 | 123.9 |
| 18034682  | H13                                                               | 378  | 41.7  |                                                                                                                              | 96.5  | 94.2  | 79.3  | 82.8  | 110.2 | 109   | 111.5 | 110.5 |
| 255308863 | Wdr4                                                              | 456  | 50.4  |                                                                                                                              | 111.8 | 107.9 | 92.8  | 92.3  | 95.8  | 105.8 | 99.8  | 89.5  |
| 124430500 | Tubb1                                                             | 451  | 50.4  | Phagosome; Gap junction                                                                                                      | 102.5 | 101   | 97    | 102.6 | 94.7  | 103.7 | 118.8 | 116.4 |
| 122937359 | Mark2                                                             | 776  | 86.3  |                                                                                                                              | 97.5  | 101.2 | 102.9 | 103.7 | 94.2  | 98    | 102.8 | 97.8  |
| 31542602  | Elavl1                                                            | 326  | 36.1  | AMPK signaling pathway                                                                                                       | 95.6  | 97.7  | 93.7  | 94.5  | 98.2  | 98.2  | 107.4 | 107.9 |

|           |                              |      |       |                                                                                                                                                                                                                                                                 |       |       |       |       |       |       |       |       |
|-----------|------------------------------|------|-------|-----------------------------------------------------------------------------------------------------------------------------------------------------------------------------------------------------------------------------------------------------------------|-------|-------|-------|-------|-------|-------|-------|-------|
| 160333835 | Snx12                        | 170  | 19.8  |                                                                                                                                                                                                                                                                 | 96.1  | 95.8  | 115.5 | 117   | 92.1  | 96.5  | 94.4  | 97.6  |
| 29244084  | Isg2012                      | 368  | 41    |                                                                                                                                                                                                                                                                 | 94.4  | 96.5  | 102.1 | 99.2  | 98    | 96.2  | 100.2 | 99    |
| 13507622  | Sacm11                       | 587  | 66.9  |                                                                                                                                                                                                                                                                 | 100.9 | 100.9 | 96.1  | 95.7  | 100.1 | 106.9 | 99    | 86.7  |
| 13384700  | Txndc12                      | 170  | 19    | Glutathione metabolism                                                                                                                                                                                                                                          | 95.2  | 100   | 87    | 92.2  | 104.5 | 94.6  | 105.9 | 102.5 |
| 121582398 | Med1                         | 1575 | 167   | Thyroid hormone signaling pathway; Endocrine resistance                                                                                                                                                                                                         | 109.2 | 109   | 96.3  | 97.1  | 104.1 | 110.6 | 109.9 | 106   |
| 9055282   | Mrel1a                       | 706  | 80.2  | Non-homologous end-joining; Homologous recombination                                                                                                                                                                                                            | 101   | 104.6 | 95    | 93.4  | 101.5 | 103.5 | 108.9 | 112   |
| 22550094  | Prkar2a                      | 402  | 45.6  | Insulin signaling pathway                                                                                                                                                                                                                                       | 102.3 | 101.5 | 106.1 | 107   | 97.3  | 100.4 | 98.5  | 102.3 |
| 314122205 | Taok3                        | 898  | 105.3 | MAPK signaling pathway                                                                                                                                                                                                                                          | 105.1 | 103.2 | 99.1  | 101   | 96.3  | 90    | 97.1  | 99.3  |
| 21313402  | Cuknzapn1                    | 116  | 13.2  |                                                                                                                                                                                                                                                                 | 106.2 | 105.4 | 99.4  | 96.7  | 95.2  | 93.1  | 101.3 | 96.5  |
| 155722992 | Slc4a1ap                     | 715  | 79.6  |                                                                                                                                                                                                                                                                 | 112.6 | 113.9 | 102.5 | 105.3 | 95    | 94.7  | 100   | 92    |
| 31981784  | 90306170<br>03Rik;<br>Dglucy | 617  | 66.3  |                                                                                                                                                                                                                                                                 | 104.3 | 98.1  | 93.6  | 99.1  | 109.7 | 113.4 | 106.1 | 109.8 |
| 84794544  | Skap1                        | 355  | 40.9  | Rap1 signaling pathway                                                                                                                                                                                                                                          | 104.4 | 96.8  | 113.9 | 111.9 | 86.8  | 85.5  | 94.7  | 90.7  |
| 7110693   | Prkaca                       | 351  | 40.5  | Oxytocin signaling pathway; Morphine addiction; Wnt signaling pathway; Cholinergic synapse; Retrograde endocannabinoid signaling; MAPK signaling pathway; Dopaminergic synapse; Progesterone-mediated oocyte maturation; Ras signaling pathway; GABAergic synap | 86.7  | 102.9 | 85.1  | 100.8 | 104.7 | 105.6 | 108.6 | 105.8 |
| 113205071 | Clpx                         | 634  | 69.2  |                                                                                                                                                                                                                                                                 | 95.9  | 86.6  | 98.5  | 81.4  | 98.6  | 122.5 | 108.6 | 123.9 |
| 41393059  | Plcg1                        | 1302 | 149.6 | ErbB signaling pathway; Leukocyte transendothelial migration; AGE-RAGE signaling pathway in diabetic complications; T cell receptor signaling pathway; Phospholipase D signaling pathway; MicroRNAs in cancer; Ras signaling pathway; VEGF signaling pathway; F | 118.4 | 105.8 | 116.1 | 102.6 | 85.7  | 92.6  | 82.6  | 89.4  |
| 260763915 | Arfgap2                      | 534  | 58.1  |                                                                                                                                                                                                                                                                 | 93.5  | 94.4  | 92    | 94.5  | 109.2 | 97    | 115.5 | 119.2 |
| 226443099 | Srbd1                        | 981  | 110.1 |                                                                                                                                                                                                                                                                 | 104.1 | 109.8 | 98.5  | 96.2  | 100   | 100   | 100.7 | 106.1 |
| 9055242   | Dnajb1                       | 340  | 38.1  | Influenza A; Protein processing in endoplasmic reticulum                                                                                                                                                                                                        | 108   | 103.5 | 100.8 | 106.2 | 87.9  | 92.1  | 96.3  | 92.6  |
| 6753412   | Cfdp1                        | 295  | 32.9  |                                                                                                                                                                                                                                                                 | 132.8 | 111.2 | 117.3 | 106.6 | 94.9  | 102.9 | 64.7  | 74.6  |
| 19527166  | Vrk3                         | 453  | 50.8  |                                                                                                                                                                                                                                                                 | 116.3 | 121.9 | 110.7 | 116.4 | 81.2  | 79.7  | 79.4  | 78.1  |
| 241982771 | Pi4ka                        | 2044 | 231.2 | Metabolic pathways; Inositol phosphate metabolism; Phosphatidylinositol signaling system                                                                                                                                                                        | 102.2 | 94.5  | 93.1  | 93    | 109.1 | 98.3  | 104.4 | 99    |
| 309262120 | Gm10145                      | 154  | 17.9  |                                                                                                                                                                                                                                                                 | 105.9 | 107.5 | 110.7 | 107.9 | 84.7  | 80.8  | 90.2  | 95.7  |
| 21312994  | Slc25a11                     | 314  | 34.1  |                                                                                                                                                                                                                                                                 | 92.6  | 90.5  | 114.2 | 115   | 99.3  | 107.5 | 95.4  | 94.7  |
| 85702366  | Ankfy1                       | 1169 | 128.6 |                                                                                                                                                                                                                                                                 | 106.8 | 106.5 | 102.2 | 96.2  | 96.2  | 95.3  | 82.1  | 99.1  |
| 171543861 | Nab2                         | 525  | 56.5  |                                                                                                                                                                                                                                                                 | 79.5  | 78.4  | 72.3  | 71.1  | 118.9 | 122.4 | 116.7 | 119.3 |
| 30519943  | Samm50                       | 469  | 51.8  |                                                                                                                                                                                                                                                                 | 98.6  | 94.8  | 96    | 97.4  | 100.5 | 103.7 | 106.9 | 96    |
| 124486698 | Cdk13                        | 1511 | 164.5 |                                                                                                                                                                                                                                                                 | 97    | 104.5 | 101.9 | 106   | 115.2 | 93.7  | 74.9  | 99.4  |
| 133725813 | Snrpn                        | 240  | 24.6  |                                                                                                                                                                                                                                                                 | 96.5  | 95.6  | 99.7  | 94.8  | 95.3  | 102.4 | 103.5 | 104.8 |
| 103472025 | Clptm1                       | 664  | 75.2  |                                                                                                                                                                                                                                                                 | 77.3  | 83.2  | 79.9  | 78.3  | 154.9 | 138.2 | 115.5 | 113.5 |
| 254540181 | Mov10                        | 1077 | 120.9 |                                                                                                                                                                                                                                                                 | 102.7 | 94.5  | 94.7  | 94.3  | 110.4 | 113.3 | 107.7 | 106   |

|           |                |      |       |                                                                                                                                                                                                                                                                 |       |       |       |       |       |       |       |       |
|-----------|----------------|------|-------|-----------------------------------------------------------------------------------------------------------------------------------------------------------------------------------------------------------------------------------------------------------------|-------|-------|-------|-------|-------|-------|-------|-------|
| 255760009 | Tia1           | 377  | 41.9  |                                                                                                                                                                                                                                                                 | 107.9 |       | 102.6 |       | 161.2 |       | 82.3  |       |
| 28372479  | Rps25          | 125  | 13.7  | Ribosome                                                                                                                                                                                                                                                        | 82.7  |       | 88.9  |       | 109.3 |       | 121.4 |       |
| 58037175  | Rnaseh2a       | 301  | 33.5  | DNA replication                                                                                                                                                                                                                                                 | 98.6  | 100   | 91.5  | 92.9  | 101.9 | 102.8 | 93.3  | 95.1  |
| 185134208 | Brd8           | 951  | 102.5 |                                                                                                                                                                                                                                                                 | 109.7 | 110.1 | 113.2 | 105   | 105.8 | 96.2  | 87    | 97    |
| 229608953 | Arhgap30       | 1093 | 119.4 |                                                                                                                                                                                                                                                                 | 102   | 104.9 | 108.7 | 108.2 | 91.1  | 92    | 83.9  | 91.6  |
| 247269607 | Dguok          | 277  | 32.3  | Metabolic pathways; Purine metabolism                                                                                                                                                                                                                           | 133.1 | 129   | 130   | 128.6 | 83.2  | 77.2  | 74.7  | 78.7  |
| 19527116  | Psph           | 225  | 25.1  | Metabolic pathways; Biosynthesis of amino acids; Glycine, serine and threonine metabolism; Carbon metabolism                                                                                                                                                    | 97.2  | 99.3  | 91.3  | 98.5  | 111.5 | 103.3 | 117.3 | 108.8 |
| 110626031 | Khdrbs1        | 443  | 48.3  |                                                                                                                                                                                                                                                                 | 95.6  | 96.4  | 98    | 94.3  | 94.7  | 94    | 108.7 | 110.6 |
| 27754134  | Rpl7l1         | 246  | 28.5  |                                                                                                                                                                                                                                                                 | 86.6  | 94.8  | 93.1  | 100   | 116.6 | 101.2 | 110.4 | 99    |
| 9055356   | Stx8           | 236  | 26.9  | SNARE interactions in vesicular transport                                                                                                                                                                                                                       | 107.1 | 104.3 | 104.4 | 97.7  | 101.5 | 98.1  | 118.5 | 137.8 |
| 165905557 | Ubash3a        | 624  | 70.1  |                                                                                                                                                                                                                                                                 | 103.2 | 104.5 | 102.4 | 101.4 | 94    | 98.7  | 94.1  | 91.5  |
| 225543552 | Frg1           | 258  | 29.1  |                                                                                                                                                                                                                                                                 | 103   | 104.5 | 102   | 101.3 | 91.9  | 92.2  | 97.4  | 95.3  |
| 110625954 | Ndufv2         | 248  | 27.3  | Metabolic pathways; Huntington's disease; Non-alcoholic fatty liver disease (NAFLD); Oxidative phosphorylation; Parkinson's disease; Alzheimer's disease                                                                                                        | 108.2 | 111.3 | 108.4 | 109.5 | 96.9  | 97.5  | 93.8  | 84.5  |
| 210032861 | Nup37          | 326  | 36.7  | RNA transport                                                                                                                                                                                                                                                   | 90.2  | 93.8  | 98.5  | 97.9  | 114   | 111.8 | 92.3  | 88.3  |
| 7305599   | Ttr            | 147  | 15.8  | Thyroid hormone synthesis                                                                                                                                                                                                                                       | 130.2 | 125.9 | 139.2 | 142.5 | 74.2  | 73.6  | 73.4  | 75.5  |
| 30424882  | Hectd3         | 861  | 97.3  |                                                                                                                                                                                                                                                                 | 110.9 | 104.8 | 110.2 | 105.7 | 101.6 | 95.2  | 92.5  | 96.3  |
| 134949013 | Rock2          | 1388 | 160.5 | Oxytocin signaling pathway; Leukocyte transendothelial migration; Wnt signaling pathway; Regulation of actin cytoskeleton; Focal adhesion; Chemokine signaling pathway; Platelet activation; Axon guidance; Sphingolipid signaling pathway; Proteoglycans in ca | 98.5  | 95.9  | 95.8  | 95.1  | 107.2 | 103.4 | 107   | 106.5 |
| 65301157  | Sp3            | 783  | 82.3  |                                                                                                                                                                                                                                                                 | 103.7 | 104.2 | 100.9 | 102.9 | 91.5  | 85.5  | 106.5 | 102.1 |
| 169646306 | Fam40a; Strip1 | 837  | 95.5  |                                                                                                                                                                                                                                                                 | 107.5 | 105.8 | 116.9 | 103.3 | 87.5  | 93.5  | 91.1  | 93.2  |
| 62241019  | Trappc11       | 1133 | 128.3 |                                                                                                                                                                                                                                                                 | 106.8 | 104.3 | 102.2 | 112.6 | 100.1 | 118.8 | 93.8  | 93.3  |
| 6755534   | Slc12a7        | 1083 | 119.4 | Collecting duct acid secretion                                                                                                                                                                                                                                  | 100.4 | 106.6 | 96.3  | 94.8  | 96.9  | 89.3  | 91.7  | 93.8  |
| 226246531 | Pgk2           | 417  | 44.8  | Metabolic pathways; Biosynthesis of amino acids; Glycolysis / Gluconeogenesis; Carbon metabolism                                                                                                                                                                |       | 56    |       | 50.6  |       | 60.9  |       | 56.5  |
| 28916671  | Adprh12        | 370  | 39.4  |                                                                                                                                                                                                                                                                 | 120.1 | 117.1 | 111.6 | 110.5 | 110.5 | 86    | 86.2  | 87.3  |
| 164565362 | Dennd4b        | 1510 | 165.7 |                                                                                                                                                                                                                                                                 | 96.8  | 90.4  | 89.9  | 96.2  | 104.3 | 101.8 | 103.1 | 99.7  |
| 31542563  | Dnajc3         | 504  | 57.4  | Influenza A; Protein processing in endoplasmic reticulum                                                                                                                                                                                                        | 93.8  | 91.8  | 91.4  | 92.2  | 105.5 | 105.3 | 102.4 | 103.1 |
| 164518923 | Trim65         | 522  | 58.4  |                                                                                                                                                                                                                                                                 | 119.8 | 107.6 | 117.8 | 97.4  | 82.6  | 99.6  | 79.4  | 94    |
| 164518898 | Tbc1d5         | 815  | 91.8  |                                                                                                                                                                                                                                                                 | 98.3  | 97.9  | 101.3 | 97.6  | 105.2 | 107.1 | 98.5  | 95.7  |
| 70906477  | Camk2d         | 499  | 56.3  | Oxytocin signaling pathway; ErbB signaling pathway; Wnt signaling pathway; Cholinergic synapse; Dopaminergic synapse; Long-term potentiation; Amphetamine addiction; Tuberculosis; Melanogenesis; Axon guidance; Oocyte meiosis; Proteoglycans in cancer; Neuro | 103   | 111.8 | 95.2  | 92.9  | 97    | 88.9  | 112.2 | 118.2 |

|           |                              |      |       |                                                                                                                                                                                                                                                                 |       |       |       |       |       |       |       |       |
|-----------|------------------------------|------|-------|-----------------------------------------------------------------------------------------------------------------------------------------------------------------------------------------------------------------------------------------------------------------|-------|-------|-------|-------|-------|-------|-------|-------|
| 240255653 | Ilk                          | 452  | 51.3  | PPAR signaling pathway; Focal adhesion; Endometrial cancer; Axon guidance; Bacterial invasion of epithelial cells                                                                                                                                               | 97.1  | 94.9  | 93.6  | 91    | 103.1 | 102.9 | 93.1  | 91.6  |
| 126090572 | A230046<br>K03Rik;<br>Washc4 | 1173 | 136.3 | Endocytosis                                                                                                                                                                                                                                                     | 107.3 | 104.8 | 107   | 108.8 | 95.4  | 89.9  | 98.8  | 97.4  |
| 119120865 | Syne1                        | 3010 | 344.3 |                                                                                                                                                                                                                                                                 | 110.4 | 107.6 | 103.5 | 97.1  | 88.1  | 91.9  | 96    | 92.3  |
| 213417964 | Zbp1                         | 187  | 20.6  | Cytosolic DNA-sensing pathway                                                                                                                                                                                                                                   |       |       |       |       |       |       |       |       |
| 255982555 | Nrf1                         | 503  | 53.5  | Huntington's disease                                                                                                                                                                                                                                            | 110.5 | 110   | 95.5  | 100.6 | 99.8  | 93.9  | 88.3  | 89.2  |
| 162287106 | Cmah                         | 577  | 66.9  | Amino sugar and nucleotide sugar metabolism                                                                                                                                                                                                                     | 98.4  | 104.8 | 104.1 | 100.2 | 88.2  | 91    | 102.1 | 99    |
| 295317325 | Snap23                       | 221  | 24.5  |                                                                                                                                                                                                                                                                 | 102.4 | 96.1  | 96.1  | 93.2  | 101.3 | 111.2 | 106.6 | 102.5 |
| 164518891 | Phf8;<br>4921501E<br>09Rik   | 1023 | 113.5 |                                                                                                                                                                                                                                                                 | 94.7  | 94.2  | 95.4  | 98.6  | 107.1 | 101.3 | 107.4 | 100.3 |
| 89886482  | Strn4                        | 760  | 81.6  |                                                                                                                                                                                                                                                                 | 163.4 | 136.9 | 89    | 88.5  | 100   | 97.3  | 92.6  | 90.3  |
| 153791547 | Abcb1a                       | 1276 | 140.6 | MicroRNAs in cancer; ABC transporters; Bile secretion                                                                                                                                                                                                           | 87    |       | 81.3  |       | 116.5 |       | 115.1 |       |
| 6678521   | Usf1                         | 310  | 33.6  |                                                                                                                                                                                                                                                                 | 120   | 121.6 | 107.8 | 98.2  | 85.8  | 100.9 | 83.2  | 90.3  |
| 26006861  | Pdxk                         | 312  | 35    | Metabolic pathways; Vitamin B6 metabolism                                                                                                                                                                                                                       | 110.9 | 110.7 | 96.7  | 100.2 | 98.2  | 97.3  | 91.1  | 93.8  |
| 28144918  | Gimap3                       | 301  | 34.2  |                                                                                                                                                                                                                                                                 | 106.3 | 100.3 | 97.6  | 104.5 | 90.7  | 99.4  | 105.3 | 96.1  |
| 84872227  | Mier1                        | 528  | 60.1  |                                                                                                                                                                                                                                                                 | 95    | 100.2 | 109.7 | 108.8 | 88    | 86.5  | 97.3  | 101.7 |
| 13385324  | Chordc1                      | 331  | 37.3  |                                                                                                                                                                                                                                                                 | 96.7  | 99.1  | 100.8 | 99.5  | 95.2  | 95    | 92.9  | 103.9 |
| 70906447  | Bclaf1                       | 919  | 105.9 |                                                                                                                                                                                                                                                                 | 97.3  | 95.5  | 92    | 93.4  | 101.7 | 102.7 | 114.1 | 114.9 |
| 115495455 | Xrn1                         | 1723 | 194.6 |                                                                                                                                                                                                                                                                 | 99.2  | 106.6 | 98.9  | 104.4 | 101.8 | 100.2 | 103.4 | 96.4  |
| 165377089 | Arhgef7                      | 705  | 79.6  |                                                                                                                                                                                                                                                                 | 95.3  | 96.6  | 92.7  | 97.9  | 103   | 101.6 | 100.4 | 109.1 |
| 91982765  | Nelfed;<br>Th11              | 591  | 66.2  |                                                                                                                                                                                                                                                                 | 105.8 | 101.5 | 117.9 | 99.7  | 108.4 | 103.9 | 92.5  | 96.6  |
| 8393627   | Irf3                         | 419  | 46.8  | Herpes simplex infection; NOD-like receptor signaling pathway; Epstein-Barr virus infection; RIG-I-like receptor signaling pathway; Hepatitis B; Toll-like receptor signaling pathway; Pertussis; Influenza A; Hepatitis C; Cytosolic DNA-sensing pathway; Vira | 98.2  | 103.7 | 99.1  | 98.2  | 112.6 | 85.1  | 65.9  | 80.2  |
| 254910995 | Naglu                        | 739  | 82.5  | Metabolic pathways; Lysosome; Glycosaminoglycan degradation                                                                                                                                                                                                     | 100.5 | 101.8 | 84.8  | 86.8  | 104.1 | 98    | 104   | 96.4  |
| 134053894 | Nup88                        | 753  | 84.9  | RNA transport                                                                                                                                                                                                                                                   | 98.2  | 96.4  | 92.2  | 95.3  | 104.7 | 99.3  | 97.7  | 103.5 |
| 39930567  | Tubgcp3                      | 905  | 103.4 |                                                                                                                                                                                                                                                                 | 104.8 | 104.2 | 96.9  | 100   | 103.3 | 98.5  | 100.5 | 96.3  |
| 22267440  | Ostf1                        | 215  | 23.8  |                                                                                                                                                                                                                                                                 | 112.8 | 109.3 | 133.4 | 136.2 | 76.8  | 78.2  | 65.9  | 73.5  |
| 254540041 | Dynlrb1                      | 96   | 11    |                                                                                                                                                                                                                                                                 | 107.5 | 110.8 | 105.1 | 105.8 | 91.5  | 89.1  | 117.2 | 112.8 |
| 440309866 | Ada                          | 352  | 40    | Primary immunodeficiency; Metabolic pathways; Purine metabolism                                                                                                                                                                                                 | 111.1 | 111.8 | 147.3 | 147.1 | 82.1  | 80.2  | 82.7  | 83.2  |
| 119392064 | Chd8                         | 2582 | 290.7 | Wnt signaling pathway                                                                                                                                                                                                                                           | 96.2  | 97.4  | 95.2  | 91.8  | 109.5 | 109   | 96.3  | 98.2  |
| 240848573 | Dhx36                        | 1001 | 113.8 | RNA degradation                                                                                                                                                                                                                                                 | 97.6  | 92.9  | 95    | 95.2  | 99.3  | 108.1 | 95.8  | 105.6 |
| 226874851 | Isg15                        | 161  | 17.9  | RIG-I-like receptor signaling pathway                                                                                                                                                                                                                           | 109.1 | 113.5 | 114.5 | 107.1 | 68.8  | 72.1  | 71.9  | 77.8  |
| 357588457 | Usp8                         | 1091 | 123.8 |                                                                                                                                                                                                                                                                 | 103.4 | 98.6  | 99.5  | 99    | 98.7  | 97.8  | 107.6 | 108.4 |

|           |             |      |       |                                                                                                                                                                                                    |       |       |       |       |       |       |       |       |
|-----------|-------------|------|-------|----------------------------------------------------------------------------------------------------------------------------------------------------------------------------------------------------|-------|-------|-------|-------|-------|-------|-------|-------|
| 71979671  | Zc3h18      | 972  | 108.2 |                                                                                                                                                                                                    | 101.9 | 112.5 | 96.3  | 94.7  | 94.3  | 92.2  | 104.9 | 105.5 |
| 281485615 | Ndufs4      | 175  | 19.8  | Metabolic pathways; Huntington's disease; Non-alcoholic fatty liver disease (NAFLD); Oxidative phosphorylation; Parkinson's disease; Alzheimer's disease                                           | 126.9 | 130.3 | 108.9 | 108.4 | 93.5  | 96.3  | 82.8  | 88.8  |
| 124487479 | Mtr         | 1253 | 139   | Metabolic pathways; Biosynthesis of amino acids; Cysteine and methionine metabolism; Selenocompound metabolism; One carbon pool by folate                                                          | 107.9 | 112.7 | 106.7 | 106   | 96.6  | 91.2  | 94    | 91.6  |
| 21426821  | Rps28       | 69   | 7.8   | Ribosome                                                                                                                                                                                           | 89.6  | 89.6  | 115.9 | 109.2 | 123.2 | 127.6 | 104.9 | 110   |
| 21728370  | Cisd2       | 135  | 15.2  |                                                                                                                                                                                                    | 104.7 | 102.2 | 100.8 | 100.6 | 97.9  | 100.5 | 91.8  | 88.7  |
| 6755478   | Srsf2       | 221  | 25.5  | Herpes simplex infection; Spliceosome                                                                                                                                                              | 83.4  | 79.5  | 83    | 76.3  | 108.3 | 110.3 | 93.2  | 103.3 |
| 8394347   | Stk39       | 556  | 60.3  |                                                                                                                                                                                                    | 91.9  | 87.9  | 82.9  | 72.6  | 110.6 | 112.8 | 121.8 | 129.3 |
| 254540032 | Ctnnb1      | 563  | 64.9  | Spliceosome                                                                                                                                                                                        | 95.9  | 99.3  | 100.5 | 102.9 | 101.1 | 98    | 94.8  | 92.7  |
| 29789020  | Cd74        | 215  | 24.4  | Herpes simplex infection; Tuberculosis; Antigen processing and presentation                                                                                                                        | 128.3 | 134.7 | 100.4 | 109.6 | 80.9  | 83.6  | 83.4  | 78.9  |
| 28201956  | Rae1        | 368  | 40.9  | Influenza A; RNA transport                                                                                                                                                                         | 104.7 | 83.4  | 86.2  | 79.2  | 109.6 | 121.2 | 100.1 | 89.6  |
| 21312536  | Meaf6       | 192  | 21.7  |                                                                                                                                                                                                    | 112.6 | 111   | 100.8 | 100   | 99.3  | 101   | 99.4  | 99.5  |
| 254692911 | Sec23ip     | 998  | 110.7 |                                                                                                                                                                                                    | 96.9  | 95.9  | 95    | 95.5  | 112.5 | 110.7 | 96    | 105.7 |
| 54312056  | Tnpo3       | 923  | 104.1 |                                                                                                                                                                                                    | 91.4  | 102.7 | 90.7  | 96.4  | 105.8 | 99.2  | 108.5 | 112.4 |
| 30424655  | Rab6b       | 208  | 23.4  |                                                                                                                                                                                                    |       | 98.4  |       | 85    |       | 91.8  |       | 112.1 |
| 117647257 | No17        | 254  | 29    |                                                                                                                                                                                                    | 99.2  | 96.7  | 100.1 | 100.6 | 92.1  | 94    | 114.1 | 114.4 |
| 6755358   | Rpl8        | 257  | 28    | Ribosome                                                                                                                                                                                           | 78.8  | 79.4  | 89.8  | 88    | 104.8 | 108.9 | 121.2 | 127.4 |
| 31982026  | Rrm1        | 792  | 90.2  | Glutathione metabolism; Metabolic pathways; Purine metabolism; Pyrimidine metabolism                                                                                                               | 55.3  | 59.4  | 66.5  | 65.8  | 159.8 | 155.1 | 155.4 | 160   |
| 110611222 | Hbs1l       | 682  | 75.1  | mRNA surveillance pathway; Legionellosis                                                                                                                                                           |       | 109.9 |       | 98.1  |       | 108.9 |       | 92.4  |
| 189339262 | Atp6v1c1    | 382  | 43.9  | mTOR signaling pathway; Rheumatoid arthritis; Metabolic pathways; Phagosome; Oxidative phosphorylation; Synaptic vesicle cycle; Collecting duct acid secretion                                     | 89.5  | 89.3  | 92.4  | 93.8  | 106.9 | 108.8 | 113.4 | 113.3 |
| 162329564 | Caprin1     | 707  | 78.1  |                                                                                                                                                                                                    | 79.3  | 83    | 80.5  | 81.7  | 120.5 | 120   | 141.1 | 136.7 |
| 13195628  | Cstf1       | 431  | 48.4  | mRNA surveillance pathway                                                                                                                                                                          | 100.4 | 105.1 | 98.3  | 101.8 | 102.9 | 103.4 | 97.4  | 82.4  |
| 134032030 | Elp2        | 831  | 93    |                                                                                                                                                                                                    | 88.8  | 90.3  | 104.9 | 113.1 | 113   | 105.8 | 96.4  | 93.1  |
| 9910572   | Stat2       | 922  | 105.3 | Herpes simplex infection; NOD-like receptor signaling pathway; Jak-STAT signaling pathway; Chemokine signaling pathway; Hepatitis B; Osteoclast differentiation; Influenza A; Hepatitis C; Measles | 104.9 | 117.7 | 103.9 | 101.2 | 93.7  | 99.3  | 90.6  | 89.6  |
| 26024309  | Ppat        | 517  | 57.4  | Metabolic pathways; Purine metabolism; Alanine, aspartate and glutamate metabolism                                                                                                                 | 99.6  | 98.8  | 102.5 | 99.7  | 98    | 96.3  | 98.7  | 98.6  |
| 124517663 | Anxa1       | 346  | 38.7  |                                                                                                                                                                                                    | 123   | 149.2 | 92.1  | 102.4 | 52.9  | 55.4  | 56.8  | 56    |
| 27754097  | Dr1         | 176  | 19.4  |                                                                                                                                                                                                    | 120.6 | 116.5 | 111.8 | 109.8 | 80.2  | 82.7  | 92.1  | 92.7  |
| 27881425  | Cwc22       | 908  | 104.7 |                                                                                                                                                                                                    | 96.9  | 99.6  | 90.9  | 96.8  | 107   | 106.4 | 107.8 | 101.1 |
| 13385800  | Tceb2; Elob | 118  | 13.2  | Ubiquitin mediated proteolysis; HIF-1 signaling pathway; Pathways in cancer; Renal cell carcinoma                                                                                                  | 101.4 | 104.2 | 98.8  | 99    | 95.3  | 97.6  | 101.2 | 91.5  |
| 7242181   | Pld3        | 488  | 54.4  | Metabolic pathways; Ether lipid metabolism; Glycerophospholipid metabolism                                                                                                                         | 100.6 | 101.2 | 98.5  | 97.2  | 114   | 113   | 111   | 109.2 |

|           |                |      |       |                                                                                                                                                                                                                                                                               |       |       |       |       |       |       |       |       |
|-----------|----------------|------|-------|-------------------------------------------------------------------------------------------------------------------------------------------------------------------------------------------------------------------------------------------------------------------------------|-------|-------|-------|-------|-------|-------|-------|-------|
| 237681189 | Gne            | 753  | 82.8  |                                                                                                                                                                                                                                                                               | 114.2 | 109.2 | 98    | 88.4  | 99.9  | 100   | 88    | 97.2  |
| 15011884  | Mgea5          | 916  | 103.1 | Insulin resistance                                                                                                                                                                                                                                                            | 84.8  | 84.5  | 80.1  | 91.9  | 111   | 110.8 | 121.7 | 110.8 |
| 171543839 | Fyn            | 534  | 60    |                                                                                                                                                                                                                                                                               | 94.9  | 93.9  | 93    | 93    | 100.7 | 102   | 107.9 | 114.1 |
| 90568036  | Ubac2          | 345  | 39    |                                                                                                                                                                                                                                                                               | 115.1 | 114.5 | 103.5 | 102.5 | 93.3  | 91.5  | 94    | 93.6  |
| 169790939 | Arhgap17       | 846  | 92.1  |                                                                                                                                                                                                                                                                               | 97.6  | 99.5  | 94.1  | 98.7  | 115.1 | 109.8 | 114.3 | 113.1 |
| 34328280  | Ctdp1          | 960  | 104.5 |                                                                                                                                                                                                                                                                               | 114.6 | 109.7 | 106.6 | 101   | 92.2  | 104.1 | 101.8 | 102.5 |
| 28076915  | Ubap2          | 1132 | 117.9 |                                                                                                                                                                                                                                                                               | 78    | 78.3  | 72.3  | 80.4  | 124.2 | 116.1 | 148.6 | 135.4 |
| 33468955  | Ik             | 557  | 65.6  |                                                                                                                                                                                                                                                                               | 101   | 96.7  | 102.2 | 97.3  | 90.4  | 94.2  | 100   | 104.1 |
| 171846276 | Akr1c13        | 323  | 37    |                                                                                                                                                                                                                                                                               | 113   | 102   | 121.6 | 103.7 | 77.7  | 90.6  | 93.3  | 98.6  |
| 100815493 | Wapal;<br>Wapl | 1200 | 134   |                                                                                                                                                                                                                                                                               | 96    | 93.7  | 96.7  | 95    | 104.2 | 110.7 | 100.9 | 99.5  |
| 33239415  | Ptrh2          | 182  | 19.6  |                                                                                                                                                                                                                                                                               | 96.7  | 93.4  | 84.6  | 78.4  | 107.3 | 109.1 | 114.2 | 116.9 |
| 133505845 | Ptpn1          | 432  | 49.6  | Insulin signaling pathway; Insulin resistance; Adherens junction                                                                                                                                                                                                              | 96.5  | 97.8  | 96.7  | 97    | 105.9 | 102   | 101.2 | 102.9 |
| 28076967  | Sugp1          | 643  | 72.6  |                                                                                                                                                                                                                                                                               | 91.2  | 90.4  | 92.4  | 83    | 107.5 | 110.7 | 113.5 | 112.5 |
| 169790941 | Arhgap17       | 818  | 88.9  |                                                                                                                                                                                                                                                                               | 107   | 114.5 | 95.1  | 94.3  | 102.8 | 103.2 | 147.9 | 137.1 |
| 268370153 | Pcf11          | 1553 | 172.6 | mRNA surveillance pathway                                                                                                                                                                                                                                                     | 106.2 | 103.7 | 96.7  | 101.7 | 96.5  | 89.1  | 102.2 | 104.9 |
| 166851828 | Atp5d          | 168  | 17.6  | Metabolic pathways; Huntington's disease; Oxidative phosphorylation; Parkinson's disease; Alzheimer's disease                                                                                                                                                                 | 132   | 125.8 | 90.6  | 90.9  | 104.4 | 100.6 | 110.3 | 109.5 |
| 21489933  | Mapk3          | 380  | 43    | Oxytocin signaling pathway; ErbB signaling pathway; FoxO signaling pathway; Acute myeloid leukemia; AGE-RAGE signaling pathway in diabetic complications; mTOR signaling pathway; Cholinergic synapse; Platinum drug resistance; Chagas disease (American trypanosomiasis)    | 107.5 | 105   | 107.2 | 112.1 | 93.4  | 94.3  | 94    | 88.3  |
| 293651567 | Ubr2           | 1755 | 199.1 |                                                                                                                                                                                                                                                                               | 99.1  | 93.2  | 92.5  | 89.1  | 105.6 | 104.7 | 105.7 | 117.7 |
| 31980994  | Dnajc7         | 494  | 56.4  |                                                                                                                                                                                                                                                                               | 93.8  | 91.9  | 87.1  | 87.6  | 105.1 | 105.1 | 112.2 | 109.4 |
| 19526976  | Dnttip1        | 328  | 36.8  |                                                                                                                                                                                                                                                                               | 113.2 | 110   | 102.3 | 101   | 92.7  | 104.7 | 94.5  | 87.5  |
| 27545181  | Araf           | 604  | 67.5  | ErbB signaling pathway; FoxO signaling pathway; Acute myeloid leukemia; Regulation of actin cytoskeleton; Progesterone-mediated oocyte maturation; Insulin signaling pathway; Endometrial cancer; Long-term potentiation; Breast cancer; Melanoma; Non-small cell lung cancer | 104.4 | 107.3 | 105.9 | 105.2 | 98.1  | 102.5 | 86.1  | 82.3  |
| 161086929 | Card11         | 1154 | 133.4 | T cell receptor signaling pathway; B cell receptor signaling pathway; NF-kappa B signaling pathway                                                                                                                                                                            | 104   | 107   | 101.7 | 107.3 | 97.6  | 89.2  | 96.4  | 88.2  |
| 226442867 | Wdr89          | 386  | 42.4  |                                                                                                                                                                                                                                                                               | 110.6 | 108.2 | 109.5 | 107.4 | 91.5  | 89.5  | 90.9  | 96.2  |
| 46402179  | Sec24b         | 1251 | 135.5 | Protein processing in endoplasmic reticulum                                                                                                                                                                                                                                   | 101.2 | 104.9 | 98.8  | 100.5 | 114.3 | 105.1 | 98.6  | 96.9  |
| 359279898 | Pdlim2         | 349  | 37.7  |                                                                                                                                                                                                                                                                               | 110.9 | 107.5 | 101.9 | 104.2 | 83.2  | 84.9  | 92.1  | 86    |
| 120444912 | Parg           | 961  | 108.5 |                                                                                                                                                                                                                                                                               | 103.6 | 98.1  | 97.7  | 99.8  | 99.6  | 90.3  | 100   | 106.3 |
| 6680946   | Cirbp          | 172  | 18.6  |                                                                                                                                                                                                                                                                               | 122.8 | 116.6 | 118.7 | 122.1 | 70.4  | 67.7  | 85.1  | 87.9  |
| 124486883 | Ttc37          | 1563 | 173.8 | RNA degradation                                                                                                                                                                                                                                                               | 97.4  | 97.3  | 102.3 | 88.1  | 105.9 | 108.8 | 93.7  | 100.7 |
| 406353182 | Nol8           | 1165 | 130.6 |                                                                                                                                                                                                                                                                               | 103.2 | 99.2  | 96.3  | 87.5  | 115.7 | 118.6 | 97.8  | 103   |
| 30424748  | Galk2          | 447  | 49.3  |                                                                                                                                                                                                                                                                               | 117.1 | 114.1 | 107.4 | 107.5 | 83.2  | 84.2  | 85.7  | 86.8  |

|           |                            |      |       |                                                                                                                                                                                                                                                                  |       |       |       |       |       |       |       |       |
|-----------|----------------------------|------|-------|------------------------------------------------------------------------------------------------------------------------------------------------------------------------------------------------------------------------------------------------------------------|-------|-------|-------|-------|-------|-------|-------|-------|
| 256220343 | Dhrs4                      | 279  | 29.9  | Retinol metabolism; Metabolic pathways; Peroxisome                                                                                                                                                                                                               | 99.5  | 99.2  | 98.2  | 96.4  | 99.9  | 100.7 | 106   | 112.3 |
| 19527228  | Cisd1                      | 108  | 12.1  |                                                                                                                                                                                                                                                                  | 99.7  | 100.5 | 102.4 | 100.6 | 104.4 | 108.4 | 90.8  | 77.9  |
| 6754094   | Gtf2h4                     | 463  | 52.2  | Basal transcription factors; Nucleotide excision repair; Viral carcinogenesis                                                                                                                                                                                    | 100.9 | 100.6 | 94.3  | 95.5  | 102.9 | 101.8 | 109.6 | 111.9 |
| 89001109  | Gna13                      | 377  | 44    | Phospholipase D signaling pathway; Regulation of actin cytoskeleton; Platelet activation; Sphingolipid signaling pathway; Long-term depression; cGMP-PKG signaling pathway; Pathways in cancer; Vascular smooth muscle contraction                               | 109.5 | 108.9 | 103.6 | 110.5 | 104.3 | 93.4  | 96.9  | 96.3  |
| 361050365 | BC017643                   | 232  | 26.2  |                                                                                                                                                                                                                                                                  | 101.3 | 109.3 | 106.9 | 107.8 | 96    | 98    | 77.5  | 73.6  |
| 131888394 | Rasgrp2                    | 608  | 69.4  | MAPK signaling pathway; Ras signaling pathway; Chemokine signaling pathway; Platelet activation; Rap1 signaling pathway; Pathways in cancer                                                                                                                      | 124.7 | 121.3 | 122.7 | 119.1 | 73.4  | 72.4  | 71.1  | 65.8  |
| 313851007 | Fkbp8                      | 403  | 43.6  |                                                                                                                                                                                                                                                                  | 94.1  | 92    | 89.8  | 90.6  | 109.6 | 100.1 | 93.1  | 113.4 |
| 9506983   | Ppp2ca                     | 309  | 35.6  | mRNA surveillance pathway; Chagas disease (American trypanosomiasis); Dopaminergic synapse; Hippo signaling pathway; Oocyte meiosis; Sphingolipid signaling pathway; Long-term depression; TGF-beta signaling pathway; Hepatitis C; PI3K-Akt signaling pathway   | 95.8  | 100.7 | 101.3 | 101.8 | 93.2  | 92.7  | 100.1 | 99.2  |
| 160708008 | Itgb7                      | 806  | 87.4  | Hypertrophic cardiomyopathy (HCM); Regulation of actin cytoskeleton; Arrhythmogenic right ventricular cardiomyopathy (ARVC); Focal adhesion; Dilated cardiomyopathy; Cell adhesion molecules (CAMs); Intestinal immune network for IgA production; Transcription | 96.1  | 105.8 | 117.3 | 113   | 97.1  | 91.1  | 89.1  | 87.9  |
| 62198210  | Cuta                       | 177  | 18.9  |                                                                                                                                                                                                                                                                  | 135   | 137.4 | 106.1 | 106.2 | 76.4  | 87.2  | 80.1  | 83.7  |
| 198278498 | 2700029<br>M09Rik;<br>Hpfl | 346  | 39.3  |                                                                                                                                                                                                                                                                  | 97.5  | 98.4  | 98.9  | 98.3  | 102.9 | 107.8 | 109.3 | 107   |
| 13195602  | Hspbp1                     | 357  | 39.1  | Protein processing in endoplasmic reticulum                                                                                                                                                                                                                      | 89    | 92    | 84.7  | 84.6  | 132.4 | 135.9 | 107.7 | 110.9 |
| 31980811  | Psm10                      | 231  | 25.1  |                                                                                                                                                                                                                                                                  | 88    | 92.8  | 95.2  | 103.8 | 104.4 | 104.1 | 94.7  | 100.6 |
| 13384810  | Acyp1                      | 99   | 11.2  | Pyruvate metabolism                                                                                                                                                                                                                                              | 127.6 | 120   | 128.8 | 128.2 | 77.7  | 77    | 76.6  | 80    |
| 13385938  | Rnmt                       | 465  | 53.3  | mRNA surveillance pathway                                                                                                                                                                                                                                        | 90.7  | 101.1 | 94.6  | 98.3  | 91.4  | 95.7  | 100.7 | 99.7  |
| 82617569  | Vprbp;<br>Deaf1            | 1419 | 159.2 |                                                                                                                                                                                                                                                                  | 107.1 | 108.1 | 98.6  | 98.4  | 96.9  | 98.2  | 94    | 95.5  |
| 21311839  | Toe1                       | 511  | 56.8  |                                                                                                                                                                                                                                                                  | 103.2 | 99.9  | 103.5 | 100.4 | 95    | 90.8  | 96.4  | 104.5 |
| 125661048 | Akap9                      | 3779 | 433.9 |                                                                                                                                                                                                                                                                  | 96.6  | 100.8 | 90.8  | 95.3  | 104.2 | 102.4 | 101.6 | 98.4  |
| 6679084   | Nmt2                       | 529  | 60.4  |                                                                                                                                                                                                                                                                  | 85.9  | 99.7  | 86.8  | 75.7  | 111.2 | 115.9 | 111.9 | 117.2 |
| 303521965 | Kat7;<br>Myst2             | 611  | 70.6  |                                                                                                                                                                                                                                                                  | 106.1 | 105   | 108.1 | 99.2  | 86.6  | 91.6  | 88.9  | 103.3 |
| 18700032  | Anp32b                     | 272  | 31.1  |                                                                                                                                                                                                                                                                  | 100.9 | 104.1 | 113.5 | 117.3 | 77.9  | 78.5  | 89.5  | 90.8  |
| 12963633  | Ndufa13                    | 144  | 16.8  | Metabolic pathways; Huntington's disease; Non-alcoholic fatty liver disease (NAFLD); Oxidative phosphorylation; Parkinson's disease; Alzheimer's disease                                                                                                         | 104.3 | 105.2 | 99.3  | 103.8 | 97.7  | 96.6  | 102.4 | 97.1  |



|           |                                         |      |       |                                                                                                                                                                                                                                                                  |       |       |       |       |       |       |       |       |
|-----------|-----------------------------------------|------|-------|------------------------------------------------------------------------------------------------------------------------------------------------------------------------------------------------------------------------------------------------------------------|-------|-------|-------|-------|-------|-------|-------|-------|
| 94421034  | Ep300                                   | 2412 | 263.1 | FoxO signaling pathway; Herpes simplex infection; Wnt signaling pathway; MicroRNAs in cancer; Jak-STAT signaling pathway; Long-term potentiation; Epstein-Barr virus infection; Tuberculosis; Melanogenesis; Hepatitis B; HTI V-L infection; Adherens junction   | 96.7  | 90.6  | 101.3 | 100.6 | 120.4 | 114.5 | 100.4 | 110.5 |
| 12963757  | Isynal                                  | 557  | 60.9  | Metabolic pathways; Inositol phosphate metabolism                                                                                                                                                                                                                | 100.9 | 92.7  | 87.5  | 83.7  | 110.9 | 115.8 | 100   | 104.6 |
| 165972339 | Ppil4                                   | 492  | 57.2  |                                                                                                                                                                                                                                                                  | 113.3 | 105.1 | 116.1 | 110   | 86.8  | 90.7  | 81.6  | 91.2  |
| 124107596 | Prkag1                                  | 330  | 37.5  | Oxytocin signaling pathway; FoxO signaling pathway; Hypertrophic cardiomyopathy (HCM); Insulin signaling pathway; Insulin resistance; Circadian rhythm; Longevity regulating pathway; Non-alcoholic fatty liver disease (NAFLD); Adipocytokine signaling pathway | 119   | 112.8 | 90.2  | 97.6  | 98.4  | 97.7  | 93.9  | 89    |
| 8393988   | Pmm2                                    | 242  | 27.6  | Metabolic pathways; Amino sugar and nucleotide sugar metabolism; Fructose and mannose metabolism                                                                                                                                                                 | 109.4 | 112   | 113.3 | 114.4 | 85.1  | 89.4  | 92.6  | 88.8  |
| 254911009 | Rrp1b                                   | 724  | 80.5  |                                                                                                                                                                                                                                                                  | 92.5  | 125.4 | 105.7 | 103.1 | 133.9 | 118.4 | 115.2 | 103   |
| 31560239  | Asrg11                                  | 326  | 33.9  |                                                                                                                                                                                                                                                                  | 108.1 | 110.1 | 115.5 | 109.2 | 83.2  | 84.2  | 90.5  | 92.6  |
| 89363038  | Mnat1                                   | 309  | 35.8  | Basal transcription factors; Nucleotide excision repair                                                                                                                                                                                                          | 114   | 87.4  | 93.9  | 88.4  | 98.9  | 106.8 | 109.2 | 107.2 |
| 149257848 | Hmgn1;<br>LOC100044391;<br>LOC102641809 | 96   | 10.1  | Herpes simplex infection                                                                                                                                                                                                                                         | 108.9 | 116   | 113.1 | 110.8 | 91.8  | 88.6  | 101.6 | 90.3  |
| 156151435 | Acp5                                    | 327  | 36.8  | Rheumatoid arthritis; Lysosome; Osteoclast differentiation                                                                                                                                                                                                       | 144.8 | 136.7 | 136.4 | 138.8 | 72.9  | 79.8  | 75.8  | 83.5  |
| 226442772 | Pgrmc2                                  | 217  | 23.3  |                                                                                                                                                                                                                                                                  | 114.4 | 112.3 | 103.9 | 113.3 | 94    | 89.4  | 94.3  | 92    |
| 16716597  | Hsd17b11                                | 298  | 32.9  |                                                                                                                                                                                                                                                                  | 113.5 | 115.2 | 107.2 | 106.7 | 85.4  | 87.7  | 91.7  | 93.3  |
| 16716395  | Sep15;<br>Selenof                       | 162  | 17.8  |                                                                                                                                                                                                                                                                  | 120.4 | 119.1 | 101.1 | 104.8 | 88.2  | 84.3  | 78.1  | 73.8  |
| 27923913  | Gimap5                                  | 308  | 34.6  |                                                                                                                                                                                                                                                                  | 95.5  | 110.8 | 91.6  | 100.7 | 106   | 103.9 | 117.2 | 94.2  |
| 112817607 | Tmx4                                    | 335  | 37.1  |                                                                                                                                                                                                                                                                  | 110.6 | 108.5 | 112.7 | 114.1 | 93.6  | 93.5  | 82    | 83.9  |
| 85861252  | Ubxn4                                   | 506  | 56.4  |                                                                                                                                                                                                                                                                  | 94.6  | 92.6  | 86.3  | 92.2  | 111.2 | 105.7 | 109.8 | 122.1 |
| 42734496  | Fam3c                                   | 227  | 24.7  |                                                                                                                                                                                                                                                                  | 87.6  | 88.2  | 90.1  | 85.8  | 114.3 | 117.1 | 105.4 | 107.2 |
| 113461980 | Mrpl41                                  | 135  | 15.3  |                                                                                                                                                                                                                                                                  | 99.5  | 104.6 | 92.4  | 94    | 113.1 | 114   | 129.9 | 134.1 |
| 7305107   | Grec10                                  | 126  | 13.2  |                                                                                                                                                                                                                                                                  | 125.5 | 127.8 | 98.4  | 92.5  | 85.8  | 87.6  | 97.3  | 102.8 |
| 159110431 | Hmbs                                    | 361  | 39.3  | Metabolic pathways; Porphyrin and chlorophyll metabolism                                                                                                                                                                                                         | 98.3  | 95.8  | 95.1  | 97.1  | 104.6 | 103.7 | 104.9 | 116.5 |
| 158966694 | Cbx5                                    | 191  | 22.2  |                                                                                                                                                                                                                                                                  | 68.6  | 76.2  | 62    | 69.8  | 139.7 | 133.3 | 151.7 | 127   |
| 13385534  | Utp11;<br>Utp11                         | 253  | 30.5  |                                                                                                                                                                                                                                                                  | 90.6  | 91.2  | 90.5  | 90.7  | 110.3 | 106.6 | 109   | 103.5 |
| 23346601  | Svil                                    | 2170 | 243   |                                                                                                                                                                                                                                                                  | 104.2 | 109.9 | 104.5 | 96    | 96.4  | 101.3 | 94.9  | 106.4 |
| 6754682   | Mettl1                                  | 268  | 30.6  |                                                                                                                                                                                                                                                                  | 111.4 | 101.6 | 94    | 94.2  | 101.7 | 107.6 | 106.1 | 106.5 |
| 294862282 | 0610010K14Rik                           | 156  | 16.3  |                                                                                                                                                                                                                                                                  | 106.3 |       | 97.6  |       | 102.3 |       | 106.2 |       |

|           |                              |      |       |                                                                                                                                                                                                                                                                 |       |       |       |       |       |       |       |       |
|-----------|------------------------------|------|-------|-----------------------------------------------------------------------------------------------------------------------------------------------------------------------------------------------------------------------------------------------------------------|-------|-------|-------|-------|-------|-------|-------|-------|
| 6753284   | Casp3                        | 277  | 31.5  | AGE-RAGE signaling pathway in diabetic complications; Herpes simplex infection; Platinum drug resistance; p53 signaling pathway; MAPK signaling pathway; MicroRNAs in cancer; Amyotrophic lateral sclerosis (ALS); TNF signaling pathway; Toxoplasmosis; Tuberc | 74.1  | 68.3  | 71.5  | 69.7  | 125.8 | 127.1 | 124.2 | 126.4 |
| 281427253 | Tprkb                        | 175  | 19.5  |                                                                                                                                                                                                                                                                 | 100.9 | 100.4 | 86.8  | 95.1  | 86.4  | 89.5  | 93.7  | 100.4 |
| 30519953  | 1810026J<br>23Rik;<br>Timm29 | 266  | 29.4  |                                                                                                                                                                                                                                                                 | 113.1 | 111.5 | 107.4 | 116.6 | 103.9 | 101.8 | 94.1  | 99.8  |
| 29789195  | Btf3l4                       | 158  | 17.3  |                                                                                                                                                                                                                                                                 | 102   | 98.5  | 101.2 | 101.5 | 100.7 | 102.3 | 94    | 96.5  |
| 225543193 | Crocc                        | 1845 | 208.1 |                                                                                                                                                                                                                                                                 | 108.6 | 119.2 | 96.5  | 103.2 | 98    | 91.9  | 103.9 | 104.3 |
| 226443083 | Ppp1r18                      | 594  | 65.6  |                                                                                                                                                                                                                                                                 | 108.3 | 107.9 | 95.1  | 93.9  | 95.2  | 95.2  | 105   | 101.5 |
| 188528624 | Prmt5                        | 637  | 72.7  | RNA transport                                                                                                                                                                                                                                                   | 84.6  | 84.6  | 92    | 93.8  | 114   | 112   | 106.3 | 103.6 |
| 226371770 | Iigp1;<br>Iigp1b             | 413  | 47.5  |                                                                                                                                                                                                                                                                 | 90.4  | 82    | 65    | 62    | 148.3 | 158.7 | 134.1 | 146.2 |
| 7305577   | Timm8a1                      | 97   | 11    |                                                                                                                                                                                                                                                                 | 130.7 | 122.2 | 109.4 | 104.2 | 96.1  | 92.9  | 88.8  | 92.2  |
| 6996917   | G6pdx                        | 515  | 59.2  | Glutathione metabolism; Metabolic pathways; Pentose phosphate pathway; Carbon metabolism; Central carbon metabolism in cancer                                                                                                                                   | 98.2  | 96.1  | 95.7  | 93.3  | 91.6  | 86.1  | 101.9 | 94.5  |
| 231570586 | Zc3h14                       | 735  | 82.4  |                                                                                                                                                                                                                                                                 | 105.2 | 110   | 99.5  | 104   | 92.5  | 96.1  | 97.8  | 97.3  |
| 13385406  | Ccdc43                       | 222  | 25    |                                                                                                                                                                                                                                                                 | 113.8 | 114.6 | 111   | 110.8 | 93.6  | 87.8  | 89.3  | 89.9  |
| 21703888  | Eif2b2                       | 351  | 38.9  | RNA transport                                                                                                                                                                                                                                                   | 88.4  | 89.3  | 88.7  | 90.3  | 110.6 | 117.7 | 117.7 | 121.1 |
| 228008297 | Tubgcp2                      | 905  | 103.2 |                                                                                                                                                                                                                                                                 | 106.4 | 110.3 | 108   | 106.1 | 95.1  | 103.1 | 93.1  | 95.2  |
| 34787412  | Hdgfrp3;<br>Hdgfl3           | 202  | 22.4  |                                                                                                                                                                                                                                                                 | 98.4  | 100.4 | 161.3 | 171.7 | 82.3  | 87    | 81.3  | 88.5  |
| 37574113  | Abr                          | 871  | 98.9  |                                                                                                                                                                                                                                                                 | 100.3 | 104.3 | 99.2  | 102.4 | 81.6  | 90.5  | 99.3  | 93.6  |
| 73622267  | Mccc2                        | 563  | 61.3  | Valine, leucine and isoleucine degradation; Metabolic pathways                                                                                                                                                                                                  | 116.6 | 108.9 | 108.5 | 113.8 | 99.5  | 98.6  | 95.9  | 77.6  |
| 270309147 | Men1                         | 617  | 68    |                                                                                                                                                                                                                                                                 | 122.7 | 131   | 95.3  | 102.3 | 88.8  | 85.1  | 88    | 89.3  |
| 268836896 | 2810004N<br>23Rik            | 281  | 31.3  |                                                                                                                                                                                                                                                                 | 93.9  | 96.5  | 82.5  | 92.5  | 113.7 | 108.8 | 129.3 | 119.7 |
| 133922588 | H2-K1                        | 369  | 41.3  | Endocytosis; Herpes simplex infection; Allograft rejection; Epstein-Barr virus infection; Cell adhesion molecules (CAMs); HTLV-I infection; Phagosome; Graft-versus-host disease; Viral myocarditis; Antigen processing and presentation; Type I diabetes melli | 101.5 | 101.2 | 93.3  | 102.5 | 99.4  | 98.8  | 100.4 | 98.9  |
| 17157983  | Crot                         | 612  | 70.2  | Peroxisome                                                                                                                                                                                                                                                      | 100.7 | 103.5 | 95.8  | 101.9 | 95.5  | 92.6  | 99.6  | 92.4  |
| 153791220 | Atad2b                       | 1460 | 164.6 |                                                                                                                                                                                                                                                                 | 106.7 | 108   | 102.4 | 98.2  | 102.7 | 100.8 | 82.9  | 87    |
| 251823835 | Cd97;<br>Adgre5              | 818  | 90.4  |                                                                                                                                                                                                                                                                 | 93.2  | 90.7  | 87.4  | 85.6  | 104.4 | 104.3 | 101.8 | 104.5 |
| 172072613 | Ctps                         | 591  | 66.6  | Metabolic pathways; Pyrimidine metabolism                                                                                                                                                                                                                       | 86.2  | 88    | 85.2  | 83.8  | 119.7 | 120.8 | 125   | 121.7 |
| 27764886  | Cops7b                       | 264  | 29.7  |                                                                                                                                                                                                                                                                 | 107.6 | 122   | 93.6  | 98.7  | 111.2 | 99.8  | 101.3 | 99    |

|           |                               |      |       |                                                                                                                                                                                                                                                                 |       |       |       |       |       |       |       |       |
|-----------|-------------------------------|------|-------|-----------------------------------------------------------------------------------------------------------------------------------------------------------------------------------------------------------------------------------------------------------------|-------|-------|-------|-------|-------|-------|-------|-------|
| 309264292 | Gm3837;<br>Pdcd5-ps;<br>Pdcd5 | 126  | 14.3  |                                                                                                                                                                                                                                                                 | 104.3 | 110.5 | 106.3 | 102.9 | 92.3  | 89.1  | 104.6 | 108.2 |
| 162287343 | Lipa                          | 397  | 45.3  | Steroid biosynthesis; Lysosome                                                                                                                                                                                                                                  | 131.8 | 135.6 | 122   | 119.3 | 85.1  | 84.7  | 82.6  | 87.1  |
| 166295220 | Nup43                         | 380  | 42    | RNA transport                                                                                                                                                                                                                                                   | 91.6  | 83.9  | 83.7  | 82.3  | 101.9 | 92.2  | 106.2 | 108.1 |
| 229608928 | Acbd3                         | 525  | 60.1  |                                                                                                                                                                                                                                                                 | 99.8  | 102.3 | 90.6  | 87.4  | 103.3 | 100.1 | 105.2 | 109.8 |
| 119226251 | Polr1c                        | 346  | 39.1  | RNA polymerase; Epstein-Barr virus infection; Metabolic pathways; Purine metabolism; Pyrimidine metabolism; Cytosolic DNA-sensing pathway                                                                                                                       | 99    | 87.5  | 94.7  | 89.8  | 112   | 113.6 | 101.3 | 99.2  |
| 205361128 | Gm12250                       | 417  | 47.2  |                                                                                                                                                                                                                                                                 | 96.8  | 98.2  | 87.2  | 83    | 125.1 | 129.2 | 111.1 | 122.3 |
| 21312406  | Adpgk                         | 496  | 53.9  | Metabolic pathways; Glycolysis / Gluconeogenesis; Carbon metabolism                                                                                                                                                                                             | 98.2  | 86.8  | 88    | 96.1  | 104.1 | 116   | 109.9 | 102.8 |
| 358679359 | Msra                          | 233  | 26    |                                                                                                                                                                                                                                                                 | 121.1 | 120.5 | 108.3 | 111.2 | 83.6  | 79.1  | 88.4  | 81.9  |
| 22095023  | Map2k4                        | 397  | 44.1  | ErbB signaling pathway; Chagas disease (American trypanosomiasis); MAPK signaling pathway; TNF signaling pathway; Epstein-Barr virus infection; Hepatitis B; HTLV-I infection; Toll-like receptor signaling pathway; Influenza A: GnRH signaling pathway; Ec en | 101.8 | 98.5  | 100.8 | 99    | 125.6 | 109.3 | 98.1  | 106.7 |
| 13385536  | Armc10                        | 306  | 33.3  |                                                                                                                                                                                                                                                                 | 106.6 | 108.3 | 99.1  | 103.5 | 96.7  | 88.7  | 106.9 | 100.6 |
| 21704140  | Hibadh                        | 335  | 35.4  | Valine, leucine and isoleucine degradation; Metabolic pathways                                                                                                                                                                                                  | 87.5  | 86.7  | 86    | 83.8  | 121.6 | 127.4 | 117.9 | 120.2 |
| 133922586 | Asun;<br>Spata30;<br>Ints13   | 732  | 82.7  |                                                                                                                                                                                                                                                                 | 107   | 106.2 | 100.5 | 96.9  | 96.4  | 104.4 | 100.7 | 92.8  |
| 164565394 | Dnajc11                       | 559  | 63.2  |                                                                                                                                                                                                                                                                 | 104   | 112.7 | 87.4  | 95.2  | 109.3 | 114.4 | 107.7 | 99.8  |
| 6754658   | Mbp                           | 250  | 27.2  |                                                                                                                                                                                                                                                                 | 143.6 | 116.3 | 100.3 | 109.6 | 123.7 | 79.3  | 94.4  | 109.2 |
| 158631240 | Nek9                          | 984  | 107.1 |                                                                                                                                                                                                                                                                 | 100.1 | 101.7 | 96.2  | 95.3  | 99.2  | 101.3 | 104.3 | 102.1 |
| 256985203 | Dap3                          | 396  | 45.3  |                                                                                                                                                                                                                                                                 | 99.8  | 99.7  | 105   | 104.6 | 109.9 | 107.9 | 92.1  | 94.9  |
| 113865905 | Zzef1                         | 2891 | 324.2 |                                                                                                                                                                                                                                                                 | 101   | 100.4 | 92.1  | 95.2  | 96.9  | 97.1  | 103.4 | 96.6  |
| 21314824  | Atp6v1f                       | 119  | 13.4  | mTOR signaling pathway; Rheumatoid arthritis; Metabolic pathways; Phagosome; Oxidative phosphorylation; Synaptic vesicle cycle; Collecting duct acid secretion                                                                                                  | 100.9 | 98.9  | 89.7  | 97.7  | 107.4 | 98.3  | 111.2 | 103.6 |
| 124487313 | Gls                           | 674  | 73.9  | MicroRNAs in cancer; GABAergic synapse; Metabolic pathways; Glutamatergic synapse; Proximal tubule bicarbonate reclamation; D-Glutamine and D-glutamate metabolism; Alanine, aspartate and glutamate metabolism; Central carbon metabolism in cancer; Arginine  | 91.3  | 97.9  | 88.9  | 106.1 | 104.3 | 106   | 119.5 | 109.5 |
| 6679807   | Fli1                          | 452  | 51    | Transcriptional misregulation in cancer                                                                                                                                                                                                                         | 112.7 | 117.9 | 104.5 | 99.9  | 88.7  | 88.5  | 95.9  | 100.6 |
| 467088726 | Gm1966                        | 2430 | 281.3 |                                                                                                                                                                                                                                                                 | 116.8 | 104.1 | 65.4  | 73.7  | 91.9  | 107.8 | 89.1  | 99.7  |
| 83977461  | Zcchc11                       | 1644 | 184.5 |                                                                                                                                                                                                                                                                 | 110.4 | 102   | 101.7 | 104.8 | 103.1 | 105   | 100.3 | 109.1 |
| 30519939  | Cnpy4                         | 245  | 28.1  |                                                                                                                                                                                                                                                                 | 107.3 | 113.1 | 103.3 | 100.5 | 95.1  | 96.8  | 95.1  | 100.4 |
| 359279938 | Fdps                          | 420  | 48.3  |                                                                                                                                                                                                                                                                 | 83.4  | 77.4  | 78.8  | 72.7  | 105.7 | 105.1 | 142.2 | 154.9 |
| 226958329 | Gpatch8                       | 1505 | 164.9 |                                                                                                                                                                                                                                                                 | 96.7  | 93.8  | 96    | 97.2  | 107.2 | 106.5 | 115   | 120.4 |

|           |                  |      |       |                                                                                                                                                                                                                                                               |       |       |       |       |       |       |       |       |
|-----------|------------------|------|-------|---------------------------------------------------------------------------------------------------------------------------------------------------------------------------------------------------------------------------------------------------------------|-------|-------|-------|-------|-------|-------|-------|-------|
| 84662768  | Osgep            | 335  | 36.3  |                                                                                                                                                                                                                                                               | 106   | 121.1 | 101.1 | 103   | 97.1  | 110.8 | 88.4  | 79.6  |
| 114052414 | Nelfe;<br>Rdbp   | 367  | 41.5  |                                                                                                                                                                                                                                                               | 112.4 | 106.9 | 101.5 | 97    | 89.2  | 104.5 | 108.6 | 109.8 |
| 130488506 | Fhl3             | 289  | 31.8  |                                                                                                                                                                                                                                                               | 100.9 | 90.2  | 90.3  | 85.5  | 93.5  | 96.6  | 109.8 | 111.4 |
| 30425302  | Rassf2           | 326  | 37.9  | Hippo signaling pathway -multiple species                                                                                                                                                                                                                     | 103.3 | 104.6 | 112.6 | 114.8 | 85.1  | 87.3  | 85.5  | 84.1  |
| 254750709 | Mapk9            | 423  | 48    |                                                                                                                                                                                                                                                               | 101   | 101.9 | 98.1  | 104.6 | 109.4 | 102.8 | 103.4 | 101.6 |
| 45504359  | Atp6v1e1         | 226  | 26.1  | mTOR signaling pathway; Rheumatoid arthritis; Metabolic pathways; Phagosome; Oxidative phosphorylation; Synaptic vesicle cycle; Collecting duct acid secretion                                                                                                | 98.5  | 103.9 | 100.5 | 108   | 103.1 | 109.1 | 101.5 | 91.4  |
| 119637828 | Trim33           | 1140 | 123.6 |                                                                                                                                                                                                                                                               | 111.3 | 96.6  | 100.3 | 100.3 | 95.7  | 98.3  | 109.2 | 104.3 |
| 23510273  | Rbm45            | 476  | 53.3  |                                                                                                                                                                                                                                                               | 95.6  | 104   | 93.2  | 92.7  | 108.9 | 107.2 | 111.5 | 107.7 |
| 31543942  | Vcl              | 1066 | 116.6 | Leukocyte transendothelial migration; Regulation of actin cytoskeleton; Focal adhesion; Adherens junction; Amoebiasis; Bacterial invasion of epithelial cells                                                                                                 | 119.5 | 103.6 | 118.3 | 105.8 | 90.5  | 96.3  | 81.3  | 76.7  |
| 262050570 | Brc3             | 291  | 33.3  | Homologous recombination; NOD-like receptor signaling pathway                                                                                                                                                                                                 | 99.3  | 105.8 | 109.4 | 102.1 | 103.8 | 111.8 | 87.7  | 99.1  |
| 260099684 | Pogz             | 1409 | 154.8 |                                                                                                                                                                                                                                                               | 100.4 | 94.2  | 92.2  | 97.6  | 108.2 | 108.3 | 104.6 | 100.3 |
| 33563294  | Pip4k2b          | 416  | 47.3  | Regulation of actin cytoskeleton; Inositol phosphate metabolism; Phosphatidylinositol signaling system                                                                                                                                                        | 109.9 | 103.7 | 101.5 | 100.3 | 86.7  | 98.3  | 77.1  | 79.7  |
| 124486903 | Whsc111;<br>Nsd3 | 1446 | 161.5 |                                                                                                                                                                                                                                                               | 93.7  | 96.6  | 94.5  | 99.5  | 97.4  | 94.7  | 111.8 | 102.7 |
| 84781779  | Ndufb6           | 128  | 15.5  | Metabolic pathways; Huntington's disease; Non-alcoholic fatty liver disease (NAFLD); Oxidative phosphorylation; Parkinson's disease; Alzheimer's disease                                                                                                      | 110.8 | 108.1 | 97.8  | 102.3 | 104.1 | 107.9 | 101.1 | 96.9  |
| 124517706 | Prkdc            | 4128 | 471.2 | Non-homologous end-joining; Cell cycle                                                                                                                                                                                                                        | 115.4 | 111.7 | 98.7  | 96.9  | 93.6  | 102.6 | 95.8  | 99.4  |
| 9055220   | Fnbp4            | 1077 | 116.2 |                                                                                                                                                                                                                                                               | 129.6 | 113.2 | 96.2  | 96.9  | 106.4 | 105.7 | 91.9  | 95    |
| 22122647  | Pcif1            | 706  | 80.5  |                                                                                                                                                                                                                                                               | 120.4 | 112.7 | 113.5 | 109.2 | 89.2  | 88.7  | 89.9  | 86.3  |
| 229608940 | Gnb1             | 340  | 37.4  | Morphine addiction; Cholinergic synapse; Retrograde endocannabinoid signaling; Dopaminergic synapse; Ras signaling pathway; GABAergic synapse; Chemokine signaling pathway; Glutamatergic synapse; Pathways in cancer; Alcoholism; PI3K-Akt signaling pathway | 92.8  | 92.7  | 91.6  | 96    | 98.1  | 97.7  | 106.9 | 110.9 |
| 359751382 | Prkar1b          | 381  | 43.2  | Insulin signaling pathway                                                                                                                                                                                                                                     | 95.9  | 100   | 109.6 | 111   | 96    | 85    | 94.5  | 85.6  |
| 23956326  | Dcaf8            | 591  | 66    |                                                                                                                                                                                                                                                               | 90.6  | 88.6  | 88.4  | 91.1  | 107.6 | 101.5 | 108.9 | 113.9 |
| 22122389  | Mcmbp            | 642  | 72.8  |                                                                                                                                                                                                                                                               | 94.6  | 94.1  | 92.8  | 95.6  | 116.3 | 111.8 | 106.8 | 114.9 |
| 31652268  | Ints3            | 1041 | 117.9 |                                                                                                                                                                                                                                                               | 105.7 | 103.6 | 113.5 | 93.5  | 98.1  | 104.2 | 92.3  | 103.9 |
| 254039596 | Isca2            | 154  | 16.7  |                                                                                                                                                                                                                                                               | 113.6 | 113.5 | 112.8 | 112.8 | 88.3  | 91.5  | 98.9  | 95.9  |
| 110625757 | Polr2i           | 125  | 14.5  | RNA polymerase; Epstein-Barr virus infection; Metabolic pathways; Purine metabolism; Huntington's disease; Pyrimidine metabolism                                                                                                                              | 113.9 | 107.7 | 116.5 | 116.3 | 96.6  | 109.8 | 51.9  | 49.3  |
| 123858774 | Btaf1            | 1848 | 206.9 |                                                                                                                                                                                                                                                               | 92.7  | 92.1  | 87.8  | 89.6  | 121.9 | 120.2 | 111.5 | 107   |
| 6755670   | Stat4            | 748  | 85.8  | Jak-STAT signaling pathway; Hepatitis B; Inflammatory bowel disease (IBD); Th1 and Th2 cell differentiation                                                                                                                                                   | 97    | 102.5 | 93.4  | 96.4  | 100.3 | 107.7 | 110.9 | 107.8 |

|           |                                |      |       |                                                                                                                                                                                                                                                                 |       |       |       |       |       |       |       |       |
|-----------|--------------------------------|------|-------|-----------------------------------------------------------------------------------------------------------------------------------------------------------------------------------------------------------------------------------------------------------------|-------|-------|-------|-------|-------|-------|-------|-------|
| 20070392  | Exosc5                         | 235  | 25.2  | RNA degradation                                                                                                                                                                                                                                                 | 99.2  | 103.9 | 117.4 | 107.6 | 116.3 | 99.3  | 91.6  | 98.7  |
| 6755342   | Rngtt                          | 597  | 68.6  | mRNA surveillance pathway                                                                                                                                                                                                                                       | 102.9 | 104.3 | 100.4 | 101.8 | 95.4  | 93.2  | 94.8  | 98    |
| 13384980  | Mrpl11                         | 192  | 20.7  | Ribosome                                                                                                                                                                                                                                                        | 94.8  | 91    | 94.9  | 89.7  | 111.1 | 116.5 | 113.1 | 113.1 |
| 300069024 | Pdlim5                         | 614  | 66.1  |                                                                                                                                                                                                                                                                 | 139.5 | 138.7 | 95.8  | 96.3  | 92    | 89.5  | 94.8  | 90.3  |
| 14149637  | Cdk6                           | 326  | 37    | p53 signaling pathway; MicroRNAs in cancer; Breast cancer; Melanoma; Small cell lung cancer; Hepatitis B; Non-small cell lung cancer; Cell cycle; Pathways in cancer; Pancreatic cancer; PI3K-Akt signaling pathway; Glioma; Viral carcinogenesis; Chronic myel | 91.2  | 100.8 | 60.8  | 63.9  | 138.1 | 128   | 141.8 | 124.6 |
| 172073169 | Ube4b                          | 1173 | 133.2 | Ubiquitin mediated proteolysis; Protein processing in endoplasmic reticulum                                                                                                                                                                                     | 96.1  | 104.4 | 92.1  | 90.9  | 100.3 | 101.1 | 114.2 | 107.2 |
| 34556205  | Cdk2                           | 346  | 39    | FoxO signaling pathway; Herpes simplex infection; p53 signaling pathway; Progesterone-mediated oocyte maturation; Epstein-Barr virus infection; Small cell lung cancer; Hepatitis B; Oocyte meiosis; Cell cycle; Pathways in cancer: PI3K-Akt signaling pathway | 82.5  | 87.4  | 74.9  | 79    | 124.7 | 121.6 | 117   | 120.2 |
| 225735645 | Psap                           | 557  | 61.4  | Lysosome                                                                                                                                                                                                                                                        | 187.1 | 178.3 | 148.9 | 139.5 | 69.7  | 71.7  | 82.1  | 84.1  |
| 15808988  | Eif4h                          | 248  | 27.3  |                                                                                                                                                                                                                                                                 | 120.1 | 124.5 | 99.3  | 97    | 88.7  | 90.5  | 100.7 | 95.6  |
| 9789933   | Nudt3                          | 168  | 19    |                                                                                                                                                                                                                                                                 | 123.9 | 133.8 | 105.5 | 114.5 | 84.4  | 77.8  | 91.3  | 92.3  |
| 31543843  | Tbce                           | 524  | 59    |                                                                                                                                                                                                                                                                 | 87.9  | 86.6  | 80.8  | 81.4  | 122   | 100.9 | 122.2 | 124.5 |
| 357197128 | Ranbp3                         | 558  | 59.3  |                                                                                                                                                                                                                                                                 | 113.7 | 108.2 | 99.3  | 97.9  | 94.7  | 94.5  | 104.7 | 101.1 |
| 158081796 | Gstt2                          | 244  | 27.6  | Glutathione metabolism; Platinum drug resistance; Drug metabolism - cytochrome P450; Chemical carcinogenesis; Metabolism of xenobiotics by cytochrome P450                                                                                                      | 113   | 110.6 | 107.7 | 109.9 | 90.8  | 90    | 88.8  | 95.1  |
| 133930784 | Dtx3l                          | 748  | 83    | Notch signaling pathway                                                                                                                                                                                                                                         | 101.8 | 104   | 97    | 93.7  | 106.2 | 106.4 | 97.8  | 103.4 |
| 85677504  | Diablo                         | 237  | 26.8  | Apoptosis - multiple species; Apoptosis                                                                                                                                                                                                                         | 130.5 | 109.8 | 113.4 | 111   | 90.6  | 119.7 | 81.7  | 88.6  |
| 79750129  | Camk1d                         | 385  | 42.9  | Oxytocin signaling pathway; Aldosterone synthesis and secretion                                                                                                                                                                                                 | 108.5 | 112.1 | 106.3 | 104.9 | 82    | 84.7  | 86.7  | 93.9  |
| 46402177  | Exoc5                          | 708  | 81.7  |                                                                                                                                                                                                                                                                 | 99.5  | 101.7 | 90.5  | 97    | 109.9 | 101.7 | 115   | 116.8 |
| 110625813 | Manf                           | 179  | 20.4  |                                                                                                                                                                                                                                                                 | 90.9  | 90.3  | 83.5  | 82.7  | 125.3 | 124.5 | 109   | 110.8 |
| 148540106 | Mut                            | 748  | 82.8  | Valine, leucine and isoleucine degradation; Metabolic pathways; Propanoate metabolism; Carbon metabolism; Glyoxylate and dicarboxylate metabolism                                                                                                               | 101.8 | 110.2 | 107.9 | 119.6 | 93.4  | 96.8  | 102.2 | 89.7  |
| 295444879 | Tnfrsf8                        | 212  | 24.3  |                                                                                                                                                                                                                                                                 | 97.7  | 104.1 | 98    | 102.1 | 84.5  | 78.3  | 110.1 | 113   |
| 198278397 | Saal1                          | 474  | 52.7  |                                                                                                                                                                                                                                                                 | 102.6 | 99.9  | 99    | 98.4  | 104.4 | 108.6 | 99.5  | 105.4 |
| 254675290 | Parp10                         | 960  | 103.6 |                                                                                                                                                                                                                                                                 | 119.2 | 117.7 | 98.1  | 95    | 117.6 | 120.6 | 90.7  | 93.2  |
| 6753358   | Cd8b1                          | 213  | 24.3  | T cell receptor signaling pathway; Primary immunodeficiency; Cell adhesion molecules (CAMs); Antigen processing and presentation: Hematopoietic cell                                                                                                            | 107.5 | 108.4 | 119.2 | 121   | 88.6  | 90.5  | 98    | 97.3  |
| 62510085  | 2810408<br>M09Rik;<br>Trp53rka | 244  | 27.4  |                                                                                                                                                                                                                                                                 |       |       |       |       |       |       |       |       |
| 6755144   | Lgals3bp                       | 577  | 64.5  |                                                                                                                                                                                                                                                                 | 98.5  | 100.9 | 92.8  | 97.9  | 104.1 | 99.5  | 106.5 | 98.4  |

|           |                             |      |       |                                                                                                                                                                                     |       |       |       |       |       |       |       |       |
|-----------|-----------------------------|------|-------|-------------------------------------------------------------------------------------------------------------------------------------------------------------------------------------|-------|-------|-------|-------|-------|-------|-------|-------|
| 124378042 | Golga2                      | 1026 | 116.2 |                                                                                                                                                                                     | 97.6  | 101.9 | 95.6  | 91.6  | 102.6 | 102.4 | 110.2 | 105.4 |
| 329755292 | Mavs                        | 503  | 53.4  | Herpes simplex infection; NOD-like receptor signaling pathway; RIG-I-like receptor signaling pathway; Hepatitis B; Influenza A; Hepatitis C; Cytosolic DNA-sensing pathway; Measles | 111.2 | 112.1 | 108.6 | 103.2 | 90.6  | 97.1  | 97.7  | 103   |
| 30794414  | Ints4                       | 964  | 108.1 |                                                                                                                                                                                     | 101.9 | 107.6 | 98    | 96.6  | 117.2 | 126.2 | 88.4  | 87.7  |
| 27754065  | Ppa1                        | 289  | 32.6  | Oxidative phosphorylation                                                                                                                                                           | 90.8  | 89.6  | 96.6  | 96.6  | 108.8 | 109.5 | 113.7 | 114.1 |
| 119508439 | Pycr1                       | 274  | 28.7  | Arginine and proline metabolism; Metabolic pathways; Biosynthesis of amino acids                                                                                                    | 97.5  | 104   | 92.7  | 103.8 | 100.7 | 97.9  | 106   | 101.1 |
| 255759921 | Nfate1                      | 939  | 101.5 |                                                                                                                                                                                     | 86.6  | 90.8  | 84    | 84.2  | 114.7 | 109.6 | 118.1 | 121.6 |
| 13277394  | Grpel1                      | 217  | 24.3  |                                                                                                                                                                                     | 92.2  | 88.5  | 89.7  | 87    | 115.1 | 115.3 | 125.7 | 130.1 |
| 21362273  | Grap                        | 217  | 25.3  |                                                                                                                                                                                     | 93.5  | 90.8  | 94    | 94.4  | 109.9 | 103.4 | 110.7 | 111.4 |
| 31560052  | Trp53rk;<br>Trp53rkb        | 244  | 27.4  |                                                                                                                                                                                     | 102.2 | 109.4 | 95.3  | 103.1 | 99.4  | 94.7  | 100.6 | 93.3  |
| 22165349  | Zw10                        | 779  | 88    |                                                                                                                                                                                     | 85.1  | 87.2  | 76.6  | 80.8  | 125.5 | 123.8 | 129.3 | 132   |
| 160333671 | Vars2                       | 1060 | 118.4 | Aminoacyl-tRNA biosynthesis                                                                                                                                                         | 99.6  | 117.6 | 101.1 | 98.7  | 98.8  | 91    | 96.5  | 92.7  |
| 314122227 | Txlna                       | 554  | 62.3  |                                                                                                                                                                                     | 79    | 93    | 80.1  | 90.8  | 109.8 | 109.5 | 137.6 | 124.4 |
| 13386120  | Nhp2                        | 153  | 17.2  | Ribosome biogenesis in eukaryotes                                                                                                                                                   | 125.3 | 114.3 | 102.6 | 106.6 | 98.8  | 96.8  | 85.4  | 75.7  |
| 257467604 | Gpd1l                       | 351  | 38.2  | Glycerophospholipid metabolism                                                                                                                                                      | 116.9 | 116.4 | 109.6 | 112.9 | 88.8  | 88.9  | 83.5  | 83.4  |
| 100818178 | Kdm2a                       | 1161 | 132.6 |                                                                                                                                                                                     | 141.6 | 122.6 | 94.9  | 92.3  | 95.6  | 101.3 | 83.6  | 97.8  |
| 58037465  | Rpl18a                      | 176  | 20.7  | Ribosome                                                                                                                                                                            | 84.1  | 85.8  | 90.1  | 92.2  | 111.9 | 113.3 | 106   | 96.5  |
| 111607453 | 483142611<br>9Rik;<br>Svne3 | 975  | 112   |                                                                                                                                                                                     | 105.4 | 104   | 95.2  | 96.1  | 103.9 | 110.4 | 104.4 | 101.8 |
| 125628662 | Med12                       | 2190 | 244.4 | Thyroid hormone signaling pathway                                                                                                                                                   | 99.9  | 90.4  | 98.9  | 99.2  | 103.2 | 117   | 94.9  | 93    |
| 62460366  | Ptms                        | 101  | 11.4  |                                                                                                                                                                                     | 110.5 | 112.4 | 96.6  | 99.5  | 86.4  | 93.3  | 110.4 | 110.1 |
| 26553441  | Cnot11;<br>D1Bwg02<br>12e   | 505  | 54.9  |                                                                                                                                                                                     | 102.4 | 99    | 97.8  | 100.9 | 104   | 104.6 | 103.6 | 103.4 |
| 213972631 | Tpx2                        | 745  | 85.8  |                                                                                                                                                                                     | 78.3  | 75    | 68.1  | 62.4  | 143.7 | 143.9 | 138.9 | 157.5 |
| 110625948 | Acat3                       | 397  | 41.4  |                                                                                                                                                                                     | 109.5 |       | 104.1 |       | 87.2  |       | 99.7  |       |
| 145301549 | Hba-a1;<br>Hba-a2           | 142  | 15.1  | African trypanosomiasis; Malaria                                                                                                                                                    | 184.8 | 193.5 | 135.9 | 141.9 | 91.3  | 82.2  | 95    | 87.2  |
| 238550124 | Nol11                       | 723  | 80.8  |                                                                                                                                                                                     | 87.8  | 85.7  | 87.1  | 87.9  | 117.3 | 115.9 | 106.7 | 103.7 |
| 255683384 | Klhdc4                      | 584  | 64.8  |                                                                                                                                                                                     | 70.6  | 77.2  | 65.9  | 67.2  | 133.3 | 126.1 | 139.9 | 136.5 |
| 158303322 | Psmb8                       | 276  | 30.2  | Proteasome                                                                                                                                                                          | 109.2 | 108.2 | 105.1 | 105   | 98.4  | 95.1  | 79.7  | 87    |
| 34328278  | Lman2                       | 358  | 40.4  | Protein processing in endoplasmic reticulum                                                                                                                                         | 81.8  | 84.2  | 79.8  | 81.6  | 110.5 | 114.4 | 122.8 | 120.1 |
| 389616154 | Dennd2d                     | 476  | 54    |                                                                                                                                                                                     | 93.9  | 95.4  | 106.5 | 109.3 | 100.6 | 102.2 | 82.6  | 84.9  |
| 19705578  | Atp6v1b2                    | 511  | 56.5  | mTOR signaling pathway; Rheumatoid arthritis; Metabolic pathways; Phagosome; Oxidative phosphorylation; Synaptic vesicle cycle; Collecting duct acid secretion                      | 98.3  | 99.7  | 100.2 | 106.7 | 101.3 | 102.2 | 102.2 | 100.1 |
| 31542571  | Dpp8                        | 892  | 102.1 |                                                                                                                                                                                     | 94.5  | 103   | 98.3  | 100.2 | 104.7 | 96.1  | 111.7 | 101.7 |

|           |                                                |      |       |                                                                                                                                                                                                                                                                 |       |       |       |       |       |       |       |       |
|-----------|------------------------------------------------|------|-------|-----------------------------------------------------------------------------------------------------------------------------------------------------------------------------------------------------------------------------------------------------------------|-------|-------|-------|-------|-------|-------|-------|-------|
| 31543218  | Mad211                                         | 205  | 23.6  | Progesterone-mediated oocyte maturation; HTLV-I infection; Oocyte meiosis; Cell cycle                                                                                                                                                                           | 98.6  | 78.9  | 98.6  | 84.8  | 113.3 | 130   | 106.2 | 135.9 |
| 166706891 | Tcf20                                          | 1987 | 215.6 |                                                                                                                                                                                                                                                                 | 95.8  | 88.8  | 96    | 93.9  | 107.1 | 93.5  | 111.8 | 99.3  |
| 21312564  | Cnn3                                           | 330  | 36.4  |                                                                                                                                                                                                                                                                 | 104.7 | 98.2  | 91.4  | 95.4  | 100.5 | 106.6 | 109.6 | 110.7 |
| 31542956  | Ube2k                                          | 200  | 22.4  | Ubiquitin mediated proteolysis                                                                                                                                                                                                                                  | 103.9 | 111.5 | 101.2 | 101   | 105.3 | 105.5 | 77.1  | 75.3  |
| 31543697  | Sgsh                                           | 502  | 56.7  | Metabolic pathways; Lysosome; Glycosaminoglycan degradation                                                                                                                                                                                                     | 119.1 | 119.2 | 109   | 102.6 | 93    | 92.4  | 56.3  | 70.6  |
| 31542427  | Csnk2a1                                        | 391  | 45.1  | Herpes simplex infection; Wnt signaling pathway; Epstein-Barr virus infection; Adherens junction; Ribosome biogenesis in eukaryotes; NF-kappa B signaling pathway; Tight junction; Measles                                                                      | 86.3  | 83.8  | 91.4  | 90.4  | 120.1 | 121   | 93.3  | 97.7  |
| 118601011 | Scamp3                                         | 349  | 38.4  |                                                                                                                                                                                                                                                                 | 100.6 | 109.4 | 103.7 | 109.4 | 101.5 | 88.7  | 96.7  | 93.5  |
| 40549397  | Ankrd17                                        | 2603 | 274   |                                                                                                                                                                                                                                                                 | 82.5  | 82.5  | 86.9  | 79    | 120.1 | 122.7 | 125.4 | 132.1 |
| 119226247 | Srsf5                                          | 269  | 30.9  | Herpes simplex infection; Spliceosome                                                                                                                                                                                                                           | 94.2  | 78.2  | 99.7  | 93    | 104.8 | 98.5  | 107.7 | 135.9 |
| 165932333 | Glo1                                           | 184  | 20.8  | Pyruvate metabolism                                                                                                                                                                                                                                             | 126.3 | 126.2 | 111.6 | 112.9 | 73.5  | 70.2  | 76.8  | 79.2  |
| 22122693  | Haus3                                          | 570  | 66.3  |                                                                                                                                                                                                                                                                 | 102.5 | 99.3  | 96.1  | 99.5  | 113.8 | 106.7 | 100.8 | 104.9 |
| 51467749  | Ints6                                          | 883  | 99.6  |                                                                                                                                                                                                                                                                 | 95.7  | 91.2  | 90.9  | 87.9  | 99.1  | 93.5  | 92.8  | 99.8  |
| 158533990 | Manba                                          | 879  | 100.8 | Lysosome; Other glycan degradation                                                                                                                                                                                                                              | 105.1 | 100.9 | 114.6 | 105.6 | 99.4  | 100   | 87.4  | 92.5  |
| 165377065 | Cmpk1                                          | 227  | 25.7  | Metabolic pathways; Pyrimidine metabolism                                                                                                                                                                                                                       | 120.8 | 120.9 | 105.6 | 95.1  | 70.6  | 72.9  | 80.7  | 93.1  |
| 26080429  | Aldh16a1                                       | 802  | 84.7  |                                                                                                                                                                                                                                                                 | 102.4 | 104.6 | 96.6  | 95.2  | 106.4 | 106.3 | 99.1  | 101.5 |
| 21312706  | Prorsd1                                        | 169  | 18.9  |                                                                                                                                                                                                                                                                 | 105.4 | 106.5 | 104.3 | 104.9 | 90    | 86.8  | 88.2  | 86.6  |
| 110625681 | Cwc27                                          | 469  | 53.5  |                                                                                                                                                                                                                                                                 | 103.9 | 107   | 100.7 | 100.3 | 98.5  | 98.3  | 90.2  | 103.5 |
| 6755082   | Prkcd                                          | 674  | 77.5  | AGE-RAGE signaling pathway in diabetic complications; Type II diabetes mellitus; NOD-like receptor signaling pathway; Chemokine signaling pathway; Insulin resistance; Fc gamma R-mediated phagocytosis; Neurotrophin signaling pathway; Vascular smooth muscle | 108.2 | 106.9 | 97.4  | 98.5  | 90.1  | 95.5  | 91.8  | 93.2  |
| 19527376  | Ciapin1                                        | 309  | 33.4  |                                                                                                                                                                                                                                                                 | 101.5 | 104.5 | 119.3 | 121.6 | 97.5  | 98.7  | 105.5 | 103.3 |
| 24025665  | Plekho2                                        | 495  | 53.8  |                                                                                                                                                                                                                                                                 | 108.8 | 108.7 | 101.8 | 111.4 | 91    | 91    | 93.8  | 91.5  |
| 124248579 | G3bp2                                          | 482  | 54.1  |                                                                                                                                                                                                                                                                 | 100.7 | 86    | 85.9  | 89    | 121   | 120.2 | 115.3 | 110.7 |
| 309267832 | Gm14217;<br>Rpl5-ps2                           | 348  | 40.1  |                                                                                                                                                                                                                                                                 | 83.6  | 86.3  | 85.1  | 84.1  | 105.1 | 106.2 | 128.1 | 127.8 |
| 34328357  | Prr14                                          | 612  | 67.8  |                                                                                                                                                                                                                                                                 | 115.7 | 106.3 | 99.2  | 97.1  | 100.5 | 106.7 | 101.2 | 106.7 |
| 407263560 | Tmed2;<br>Gm21540;<br>LOC100862175;<br>Gm10698 | 201  | 22.7  |                                                                                                                                                                                                                                                                 | 105.7 | 104.3 | 102.1 | 93.5  | 105.6 | 100.7 | 95.9  | 99.1  |
| 165972321 | Lemd2                                          | 511  | 57.5  |                                                                                                                                                                                                                                                                 | 113.5 | 105.3 | 90.2  | 95.9  | 94    | 94.9  | 99.7  | 103.9 |
| 6753670   | Dpm1                                           | 260  | 29.2  | Metabolic pathways; N-Glycan biosynthesis                                                                                                                                                                                                                       | 106.9 | 102   | 102.3 | 97.4  | 119.7 | 115.2 | 82.3  | 82.7  |
| 27552760  | Tomm70a                                        | 611  | 67.5  |                                                                                                                                                                                                                                                                 | 96.3  | 93.7  | 96.3  | 95.6  | 107.4 | 107   | 106.7 | 110   |

|           |                    |      |       |                                                                                                                                                                                                                                                                 |       |       |       |       |       |       |       |       |
|-----------|--------------------|------|-------|-----------------------------------------------------------------------------------------------------------------------------------------------------------------------------------------------------------------------------------------------------------------|-------|-------|-------|-------|-------|-------|-------|-------|
| 268370057 | Ccdc132;<br>Vps50  | 964  | 111.1 |                                                                                                                                                                                                                                                                 | 105.1 | 96.9  | 105.3 | 90.6  | 101.8 | 98.6  | 94.7  | 107   |
| 56711244  | Ndufs6             | 116  | 13    | Metabolic pathways; Huntington's disease; Non-alcoholic fatty liver disease (NAFLD); Oxidative phosphorylation; Parkinson's disease; Alzheimer's disease                                                                                                        | 138.5 | 117.5 | 109.4 | 104.2 | 142.3 | 96.6  | 93.1  | 103.4 |
| 47059480  | Srpk2              | 682  | 76.8  |                                                                                                                                                                                                                                                                 | 98.7  | 99.6  | 117.1 | 108.6 | 94.8  | 98.3  | 90.6  | 96.8  |
| 67906177  | Sec23a             | 765  | 86.1  | Protein processing in endoplasmic reticulum                                                                                                                                                                                                                     | 109.7 | 112.4 | 87    | 96    | 98.6  | 99.3  | 100   | 98.5  |
| 22219432  | Ehmt2              | 1172 | 128.3 |                                                                                                                                                                                                                                                                 | 131   | 118.1 | 91.2  | 96.6  | 124.7 | 110.8 | 95.1  | 101.6 |
| 9625037   | Rhog               | 191  | 21.3  | Salmonella infection; Bacterial invasion of epithelial cells                                                                                                                                                                                                    | 108.6 | 107.8 | 105.2 | 105.3 | 89.2  | 87    | 98.4  | 92.5  |
| 227116261 | Orc3               | 715  | 82.3  | Cell cycle                                                                                                                                                                                                                                                      | 88.6  | 91.4  | 102.6 | 103.2 | 121   | 125.4 | 116.8 | 110.9 |
| 31543476  | Phf2               | 1096 | 120.7 |                                                                                                                                                                                                                                                                 | 96    | 94.5  | 103.4 | 102.8 | 96.7  | 98.8  | 107.5 | 107.9 |
| 13384778  | Pgls               | 257  | 27.2  | Metabolic pathways; Pentose phosphate pathway; Carbon metabolism                                                                                                                                                                                                | 113.9 | 125.6 | 114.4 | 114.2 | 89.6  | 78    | 86.9  | 83.8  |
| 94681061  | Prkaa1             | 559  | 63.9  | Oxytocin signaling pathway; FoxO signaling pathway; mTOR signaling pathway; Hypertrophic cardiomyopathy (HCM); Insulin signaling pathway; Insulin resistance; Circadian rhythm; Longevity regulating pathway; Non-alcoholic fatty liver disease (NAFLD); Autoph | 101.4 | 109.2 | 116.7 | 111.7 | 94.1  | 84.7  | 80.6  | 76.5  |
| 110626010 | Nt5dc1             | 467  | 53.1  |                                                                                                                                                                                                                                                                 | 94.4  | 93.1  | 97.7  | 96.9  | 104.2 | 109.8 | 115.5 | 113   |
| 6755690   | Stxbp3a;<br>Stxbp3 | 592  | 67.9  |                                                                                                                                                                                                                                                                 | 94    | 96.1  | 101.7 | 95.8  | 95.3  | 103.5 | 130   | 114   |
| 327412300 | Arhgap27           | 869  | 97    |                                                                                                                                                                                                                                                                 | 124.3 | 133.6 | 108.9 | 109.4 | 85.8  | 80.6  | 84.5  | 88.2  |
| 22094989  | Timm50             | 353  | 39.8  |                                                                                                                                                                                                                                                                 | 87.8  | 87.6  | 90.7  | 87    | 113.5 | 121.2 | 118.5 | 119.4 |
| 194018503 | Cep250             | 2435 | 278.8 |                                                                                                                                                                                                                                                                 | 120   | 109   | 98.2  | 87.3  | 118.8 | 97.5  | 96.9  | 55.2  |
| 160707958 | Anxa7              | 463  | 49.9  |                                                                                                                                                                                                                                                                 | 103.7 | 102   | 96.3  | 99    | 96    | 97.8  | 104.4 | 104.6 |
| 33468981  | Nvl                | 855  | 94.4  | Ribosome biogenesis in eukaryotes                                                                                                                                                                                                                               | 90.4  | 85.3  | 91    | 83.6  | 110.6 | 121.7 | 114.8 | 123.2 |
| 33859751  | Rab21              | 222  | 24.1  |                                                                                                                                                                                                                                                                 | 108.1 | 106.2 | 100.3 | 99.1  | 94.5  | 98.1  | 97.6  | 92.7  |
| 262050556 | Fundc2             | 151  | 16.6  |                                                                                                                                                                                                                                                                 | 77.2  | 75.8  | 79.3  | 82    | 124.8 | 122.8 | 127.7 | 129.2 |
| 22122625  | Hibch              | 385  | 43    | Valine, leucine and isoleucine degradation; Metabolic pathways; beta-Alanine metabolism; Propanoate metabolism; Carbon metabolism                                                                                                                               | 111.6 | 109.6 | 108   | 110.2 | 90.9  | 92.6  | 96.7  | 95.1  |
| 281183372 | Fam114a2           | 497  | 54    |                                                                                                                                                                                                                                                                 | 110   | 105.8 | 106.8 | 93.4  | 100.6 | 99.9  | 98.6  | 107.5 |
| 270265841 | Usp19              | 1360 | 150.5 |                                                                                                                                                                                                                                                                 | 90.5  | 97.4  | 141.1 | 96.5  | 106.4 | 114.2 | 93.1  | 98.8  |
| 169790907 | Rpfl               | 349  | 40    |                                                                                                                                                                                                                                                                 | 93.8  | 93.4  | 97.3  | 97.6  | 112.6 | 110.1 | 107.4 | 98.3  |
| 39573709  | Hn11; Jpt2         | 190  | 20    |                                                                                                                                                                                                                                                                 | 106.4 | 123.8 | 94.9  | 93.8  | 109.2 | 103.6 | 118.3 | 118.9 |
| 13385046  | Zmat2              | 199  | 23.6  | Spliceosome                                                                                                                                                                                                                                                     | 108.3 | 122.8 | 90.3  | 101.1 | 89.5  | 86    | 105.1 | 104.8 |
| 19923058  | Lrrc8c             | 803  | 92.3  |                                                                                                                                                                                                                                                                 | 102.6 | 108.4 | 97.2  | 100.9 | 94.4  | 96.4  | 104.5 | 87.8  |
| 22122795  | Dync1li1           | 523  | 56.6  | Phagosome; Salmonella infection; Vasopressin-regulated water reabsorption                                                                                                                                                                                       | 99.2  | 103.2 | 100.7 | 100.6 | 104.6 | 94.1  | 95.1  | 99.6  |
| 242332488 | Chuk               | 745  | 84.8  |                                                                                                                                                                                                                                                                 | 115.1 | 105.7 | 95.1  | 97.2  | 125.1 | 115.5 | 96.7  | 105.6 |
| 7242156   | Lypla2             | 231  | 24.8  | Glycerophospholipid metabolism                                                                                                                                                                                                                                  | 115.1 | 122.7 | 130.1 | 139.2 | 74.5  | 68.1  | 84.6  | 78.2  |
| 406647878 | Capg               | 349  | 38.7  |                                                                                                                                                                                                                                                                 | 122.3 | 124.9 | 83.2  | 89.4  | 103.6 | 101.7 | 95.1  | 104.4 |



|           |         |      |       |                                                                                                                                                                                                                                                                 |       |       |       |       |       |       |       |       |
|-----------|---------|------|-------|-----------------------------------------------------------------------------------------------------------------------------------------------------------------------------------------------------------------------------------------------------------------|-------|-------|-------|-------|-------|-------|-------|-------|
| 27369613  | Exog    | 368  | 41.4  |                                                                                                                                                                                                                                                                 | 103.6 | 100.8 | 105.1 | 108.6 | 106.3 | 101.9 | 93.5  | 94.2  |
| 364023817 | Mrp139  | 336  | 38.5  |                                                                                                                                                                                                                                                                 | 93.5  | 94.2  | 98.4  | 93.5  | 109.6 | 105.8 | 103   | 107.8 |
| 6680724   | Arf6    | 175  | 20.1  | Endocytosis; Phospholipase D signaling pathway; Ras signaling pathway; Fc gamma R-mediated phagocytosis                                                                                                                                                         | 85.9  | 86.9  | 93.6  | 92.4  | 103.5 | 102.1 | 105.9 | 104.1 |
| 7657067   | Ero1l   | 464  | 54.1  | Protein processing in endoplasmic reticulum                                                                                                                                                                                                                     | 92.3  | 86.2  | 79.8  | 84.8  | 126.4 | 126.4 | 120.9 | 105.7 |
| 9790261   | Tfg     | 397  | 43    |                                                                                                                                                                                                                                                                 | 96.7  | 96.2  | 90.3  | 85.9  | 101.3 | 103.8 | 113.4 | 114.9 |
| 124487283 | Upf2    | 1269 | 147.5 | mRNA surveillance pathway; RNA transport                                                                                                                                                                                                                        | 101.2 | 113.9 | 93.9  | 93.5  | 105.8 | 102.9 | 104.6 | 105.3 |
| 31560090  | Plbd2   | 594  | 66.2  |                                                                                                                                                                                                                                                                 | 118.7 | 122.2 | 111.3 | 111.2 | 98.8  | 99.7  | 101.1 | 104.7 |
| 112983648 | Pde3b   | 1099 | 122   | Morphine addiction; Progesterone-mediated oocyte maturation; Regulation of lipolysis in adipocytes; Insulin signaling pathway; Purine metabolism; cGMP-PKG signaling pathway; cAMP signaling pathway; Renin secretion; Glucagon signaling pathway               | 110   | 105.8 | 97.8  | 95.2  | 101.2 | 99.1  | 102.3 | 101.2 |
| 20982845  | Fus     | 518  | 52.6  | Transcriptional misregulation in cancer                                                                                                                                                                                                                         | 103.4 | 99.3  | 99.6  | 94.5  | 94.2  | 94.1  | 118.8 | 124.4 |
| 224967109 | Gorasp2 | 451  | 47    |                                                                                                                                                                                                                                                                 | 105.5 | 113.5 | 90.4  | 88.5  | 105.1 | 104.5 | 108.7 | 87.9  |
| 31543001  | Tbl1xr1 | 514  | 55.6  | Wnt signaling pathway                                                                                                                                                                                                                                           | 99.1  | 101   | 99.5  | 103   | 96.7  | 94.6  | 99.8  | 96.6  |
| 21644585  | Oas3    | 1138 | 126.3 | Herpes simplex infection; NOD-like receptor signaling pathway; Influenza A; Hepatitis C; Measles                                                                                                                                                                | 105.6 | 119.4 | 103   | 99.5  | 97.3  | 77.1  | 85.1  | 78.9  |
| 213688406 | Dynll1  | 89   | 10.4  | Vasopressin-regulated water reabsorption                                                                                                                                                                                                                        | 107.8 | 103.7 | 109.7 | 110.8 | 85.5  | 86.3  | 88.5  | 82.7  |
| 31543115  | Lcp2    | 533  | 60.2  | T cell receptor signaling pathway; Platelet activation; Osteoclast differentiation; Rap1 signaling pathway; Natural killer cell mediated cytotoxicity; Fc epsilon RI signaling pathway                                                                          | 80.5  | 81.8  | 80    | 83.3  | 110.5 | 110.4 | 125.6 | 124.5 |
| 114052809 | Inf2    | 1271 | 138.3 |                                                                                                                                                                                                                                                                 | 115.4 | 105.2 | 87.3  | 91.8  | 98.9  | 104.9 | 93    | 96.5  |
| 124486789 | Pik3r4  | 1358 | 152.5 | Autophagy                                                                                                                                                                                                                                                       | 105.2 | 103   | 101.5 | 89.9  | 103.8 | 95.8  | 96.2  | 107.5 |
| 40254163  | Mff     | 291  | 32.9  |                                                                                                                                                                                                                                                                 | 100.5 | 100   | 98    | 98.9  | 103.1 | 95.1  | 104.5 | 104.8 |
| 8394024   | Ppp2cb  | 309  | 35.6  | mRNA surveillance pathway; Chagas disease (American trypanosomiasis); Dopaminergic synapse; Hippo signaling pathway; Oocyte meiosis; Sphingolipid signaling pathway; Long-term depression; TGF-beta signaling pathway; Hepatitis C; PI3K-Akt signaling pathway  | 103   |       | 111.3 |       | 91.1  |       | 88.1  |       |
| 188219582 | Gnpda1  | 289  | 32.5  | Metabolic pathways; Amino sugar and nucleotide sugar metabolism                                                                                                                                                                                                 | 105.1 | 103.3 | 96.5  | 95.8  | 96.7  | 92.7  | 76.7  | 94.9  |
| 31543940  | Vapb    | 243  | 26.9  |                                                                                                                                                                                                                                                                 | 97.2  | 98    | 99.8  | 97.3  | 97    | 96.4  | 102.3 | 102.6 |
| 21312151  | Chmp2a  | 222  | 25.1  | Endocytosis                                                                                                                                                                                                                                                     | 103   | 106.1 | 109.7 | 100.5 | 103.6 | 96.4  | 104.4 | 101.4 |
| 313103028 | Tnip1   | 647  | 72.9  |                                                                                                                                                                                                                                                                 | 255.7 | 199.6 | 77.2  | 81.4  | 80.8  | 89.4  | 86.9  | 98.8  |
| 40254179  | Smug1   | 279  | 30.6  | Base excision repair                                                                                                                                                                                                                                            | 92    | 104.2 | 128.8 | 113.8 | 84.7  | 93    | 87.6  | 85.7  |
| 226958612 | Rbm27   | 1005 | 112.6 |                                                                                                                                                                                                                                                                 | 97.2  | 97.4  | 97.3  | 97.4  | 102.2 | 94.8  | 103   | 109.6 |
| 344313177 | Cdc42   | 191  | 21.3  | Leukocyte transendothelial migration; AGE-RAGE signaling pathway in diabetic complications; Endocytosis; T cell receptor signaling pathway; Regulation of actin cytoskeleton; MAPK signaling pathway; Ras signaling pathway; VEGF signaling pathway; Focal adhe | 116.3 | 122.3 | 97.7  | 96.2  | 97    | 99    | 109.2 | 98.7  |

|           |                               |      |       |                                                                                                                                                                                                                                                                  |       |       |       |       |       |       |       |       |
|-----------|-------------------------------|------|-------|------------------------------------------------------------------------------------------------------------------------------------------------------------------------------------------------------------------------------------------------------------------|-------|-------|-------|-------|-------|-------|-------|-------|
| 20149316  | Isy1                          | 285  | 33    | Spliceosome                                                                                                                                                                                                                                                      | 103.5 | 103   | 96.1  | 90.7  | 104.9 | 107.9 | 112.1 | 111.7 |
| 23943924  | Tubgcp4                       | 667  | 76.1  |                                                                                                                                                                                                                                                                  | 115.7 | 113.5 | 96    | 103   | 117   | 119.1 | 95.2  | 109.2 |
| 254553348 | Pfkm                          | 780  | 85.2  | RNA degradation; Metabolic pathways; Biosynthesis of amino acids; Glycolysis / Gluconeogenesis; Pentose phosphate pathway; AMPK signaling pathway; Carbon metabolism; Fructose and mannose metabolism; Galactose metabolism; Central carbon metabolism in cancer | 109.6 | 91.8  | 100.5 | 94.9  | 92.8  | 101.9 | 98.4  | 102.9 |
| 226529982 | Morc2a                        | 1030 | 117.3 |                                                                                                                                                                                                                                                                  | 102.9 | 103.5 | 98.7  | 92.9  | 101.9 | 107   | 103.8 | 98    |
| 46518528  | Acs14                         | 711  | 79    | PPAR signaling pathway; Fatty acid metabolism; Metabolic pathways; Fatty acid degradation; Adipocytokine signaling pathway; Fatty acid biosynthesis; Peroxisome                                                                                                  | 98.2  | 99.5  | 94.9  | 99.3  | 103   | 100.2 | 105.7 | 110.3 |
| 16905115  | Mta3                          | 591  | 67    |                                                                                                                                                                                                                                                                  | 88    | 86.2  | 97.4  | 106.3 | 90.7  | 102.5 | 151.3 | 97.8  |
| 223634002 | Hbs11                         | 612  | 67.5  |                                                                                                                                                                                                                                                                  | 97.7  | 103.2 | 99.2  | 102.6 | 102.2 | 106   | 105.6 | 106.2 |
| 66392160  | Vps13a                        | 3166 | 359.2 |                                                                                                                                                                                                                                                                  | 108.2 | 106.1 | 96.8  | 96.8  | 108.6 | 109.1 | 97    | 101.8 |
| 13384660  | Mrpl2                         | 306  | 33.3  | Ribosome                                                                                                                                                                                                                                                         | 107.3 | 99.5  | 80.6  | 93    | 97.7  | 120.4 | 124   | 95    |
| 124486915 | Heatr2;<br>Dnaaf5             | 853  | 93.8  |                                                                                                                                                                                                                                                                  | 96.3  | 105.2 | 97.5  | 97.7  | 115   | 106.7 | 97.3  | 102   |
| 21313012  | Rab4b                         | 213  | 23.6  |                                                                                                                                                                                                                                                                  | 112.7 | 109.3 | 112.8 | 108.9 | 87.4  | 87.3  | 83.3  | 82    |
| 40254600  | Anp32a                        | 247  | 28.5  |                                                                                                                                                                                                                                                                  | 104.4 | 110.7 | 130.1 | 124.1 | 73.1  | 75.1  | 71.2  | 67.4  |
| 149258501 | LOC100046151;<br>LOC102641364 | 357  | 39.6  |                                                                                                                                                                                                                                                                  | 98.4  | 97.1  | 93    | 96.4  | 106.4 | 106.2 | 105.2 | 105.1 |
| 31982421  | Yy1                           | 414  | 44.7  |                                                                                                                                                                                                                                                                  | 108.1 | 107.5 | 100.9 | 102.3 | 85.7  | 84.1  | 88.5  | 86    |
| 258547111 | Tomm6                         | 74   | 7.9   |                                                                                                                                                                                                                                                                  | 103.9 | 108.6 | 84.8  | 72.7  | 112.5 | 127   | 113.8 | 126.6 |
| 42415473  | Ppp3ca                        | 521  | 58.6  | Oxytocin signaling pathway; Wnt signaling pathway; T cell receptor signaling pathway; MAPK signaling pathway; Dopaminergic synapse; Amyotrophic lateral sclerosis (ALS); VEGF signaling pathway; Long-term potentiation; Amphetamine addiction; Tuberculosis; A  | 106.8 | 124.2 | 103.8 | 109   | 91.2  | 82.6  | 97.4  | 89.9  |
| 50053824  | Eea1                          | 1411 | 160.8 | Endocytosis; Tuberculosis; Phagosome                                                                                                                                                                                                                             | 85.4  | 78.1  | 77.5  | 72.2  | 124.5 | 140.1 | 142.4 | 152.9 |
| 187608416 | Ptpn2                         | 406  | 47.3  | Jak-STAT signaling pathway                                                                                                                                                                                                                                       | 104.9 | 102.8 | 92.6  | 92.7  | 101.1 | 106.3 | 92.5  | 100.2 |
| 227430380 | Pum1                          | 1189 | 126.5 |                                                                                                                                                                                                                                                                  | 116   | 92    | 115.1 | 87.1  | 74.2  | 131.2 | 82.9  | 100.4 |
| 254911027 | Nbeal2                        | 2750 | 302.6 |                                                                                                                                                                                                                                                                  | 102.4 | 97.6  | 97.6  | 88.5  | 112.2 | 120.8 | 102.4 | 109.5 |
| 83921574  | Exoc4                         | 975  | 110.5 | Tight junction                                                                                                                                                                                                                                                   | 111.6 | 120.5 | 91.5  | 108.5 | 104   | 98.8  | 94.1  | 96.1  |
| 13385006  | Cyc1                          | 325  | 35.3  | Metabolic pathways; Huntington's disease; Non-alcoholic fatty liver disease (NAFLD); Oxidative phosphorylation; Parkinson's disease; Alzheimer's disease; Cardiac muscle contraction                                                                             | 113   | 115   | 99.9  | 112.1 | 90.1  | 89    | 96.6  | 90.9  |
| 357933645 | Ptgr2                         | 351  | 38    |                                                                                                                                                                                                                                                                  | 118.4 | 123.9 | 101.9 | 110.2 | 105.7 | 79.6  | 90.1  | 88.1  |
| 188219555 | Eif2b4                        | 544  | 59.6  |                                                                                                                                                                                                                                                                  | 92.1  | 90.9  | 92.4  | 95.7  | 113   | 119.2 | 117.1 | 118.3 |
| 31541819  | Rraga                         | 313  | 36.5  | mTOR signaling pathway                                                                                                                                                                                                                                           | 99.2  | 96.9  | 91    | 95.7  | 107.2 | 108.6 | 94.8  | 97.2  |
| 8393853   | Nudt5                         | 218  | 24    | Purine metabolism                                                                                                                                                                                                                                                | 86.7  | 94    | 90.1  | 97.6  | 134.1 | 127   | 74.4  | 85.4  |

|           |                   |      |       |                                                                                                                                                                                                                                                                                                                                                        |       |       |       |       |       |       |       |       |
|-----------|-------------------|------|-------|--------------------------------------------------------------------------------------------------------------------------------------------------------------------------------------------------------------------------------------------------------------------------------------------------------------------------------------------------------|-------|-------|-------|-------|-------|-------|-------|-------|
| 160333837 | Rpl36             | 105  | 12.2  | Ribosome                                                                                                                                                                                                                                                                                                                                               | 110.2 | 106.7 | 89    | 88.7  | 89.3  | 98.7  | 118.1 | 114.5 |
| 240120036 | Galnt6            | 622  | 71.5  | Metabolic pathways; Mucin type O-glycan biosynthesis                                                                                                                                                                                                                                                                                                   | 110.1 | 100   | 93.1  | 98.5  | 105.9 | 101.9 | 103   | 103   |
| 21313544  | Bcs1l             | 418  | 47.4  |                                                                                                                                                                                                                                                                                                                                                        | 126.3 | 156.3 | 98.4  | 127.2 | 109   | 93.4  | 92.7  | 97.6  |
| 157841170 | Pddcl1;<br>Gatd1  | 220  | 23.3  |                                                                                                                                                                                                                                                                                                                                                        | 116.6 | 117.9 | 112.2 | 102.3 | 86.2  | 88.2  | 96.6  | 96.3  |
| 60097929  | Rassf5            | 413  | 46.7  | Leukocyte transendothelial migration; Ras signaling pathway; Non-small cell lung cancer; Rap1 signaling pathway; Pathways in cancer                                                                                                                                                                                                                    | 109.5 | 108.6 | 105.5 | 110.1 | 86.3  | 84    | 88.7  | 89.7  |
| 24415998  | Smc6              | 1097 | 127.1 |                                                                                                                                                                                                                                                                                                                                                        | 100.4 | 99.3  | 99.1  | 92.8  | 96.1  | 98.1  | 96.3  | 100.4 |
| 298358621 | Tmsb10            | 44   | 5     |                                                                                                                                                                                                                                                                                                                                                        | 126.8 | 124.3 | 135.1 | 133.8 | 58.4  | 62.1  | 81.3  | 81.9  |
| 262073031 | Fam50a            | 339  | 40.2  |                                                                                                                                                                                                                                                                                                                                                        | 105   | 99.8  | 100.2 | 94.2  | 100   | 104.9 | 108.2 | 110.7 |
| 66792792  | Bcat1             | 453  | 49.9  |                                                                                                                                                                                                                                                                                                                                                        | 66.7  | 65.2  | 62.4  | 63    | 158.3 | 152.2 | 166.6 | 169.8 |
| 228480230 | Gltscr2;<br>Nop53 | 484  | 55.8  | Herpes simplex infection                                                                                                                                                                                                                                                                                                                               | 90.4  | 94.9  | 92.1  | 88.6  | 117.3 | 117.1 | 128.4 | 123.3 |
| 15809002  | Snf8              | 258  | 28.9  | Endocytosis                                                                                                                                                                                                                                                                                                                                            | 96.8  | 97.5  | 99.4  | 97    | 96.3  | 93.8  | 105.1 | 105.7 |
| 31980617  | Vti1b             | 232  | 26.7  | SNARE interactions in vesicular transport                                                                                                                                                                                                                                                                                                              | 101.2 | 104.7 | 105.2 | 107.9 | 99.1  | 97.8  | 101.8 | 104.8 |
| 27883844  | Snrpe             | 92   | 10.8  | Spliceosome                                                                                                                                                                                                                                                                                                                                            | 102   | 101.5 | 99    | 95.5  | 101.3 | 102.7 | 94.3  | 95.4  |
| 6678794   | Map2k1            | 393  | 43.4  | Oxytocin signaling pathway; ErbB signaling pathway; FoxO signaling pathway; Acute myeloid leukemia; mTOR signaling pathway; Cholinergic synapse; T cell receptor signaling pathway; Phospholipase D signaling pathway; Regulation of actin cytoskeleton; MAPK signaling pathway; PPAR signaling pathway; Fatty acid metabolism; Fatty acid degradation | 104   | 105.4 | 101.1 | 102.2 | 101.3 | 97.1  | 100.7 | 101.3 |
| 162138915 | Cpt2              | 658  | 73.9  |                                                                                                                                                                                                                                                                                                                                                        | 115.3 | 114.6 | 102.6 | 101.8 | 94.9  | 102.3 | 97.5  | 91    |
| 256220113 | Clybl             | 338  | 37.5  |                                                                                                                                                                                                                                                                                                                                                        | 129.5 | 119   | 103.1 | 106.8 | 89.5  | 105.4 | 89.7  | 87.5  |
| 110625811 | Prrc1             | 443  | 46.3  |                                                                                                                                                                                                                                                                                                                                                        | 93.8  | 94.3  | 85.6  | 96.2  | 102.4 | 106   | 109   | 101.1 |
| 83649741  | Wdr18             | 431  | 47.2  |                                                                                                                                                                                                                                                                                                                                                        | 94    | 99    | 92.8  | 91.9  | 110.1 | 107.4 | 91.8  | 94.9  |
| 37574121  | Scyl2             | 930  | 103.3 |                                                                                                                                                                                                                                                                                                                                                        | 95.6  | 93.8  | 95.4  | 91.1  | 109   | 113.1 | 105   | 107.9 |
| 21729749  | Polb              | 335  | 38.3  | HIV-1 infection; Base excision repair; viral proteinogenesis                                                                                                                                                                                                                                                                                           | 105.7 | 100   | 95    | 93.5  | 97.2  | 98    | 91.5  | 90.4  |
| 9790153   | Pex14             | 376  | 41.2  | Peroxisome                                                                                                                                                                                                                                                                                                                                             | 82.8  | 86.2  | 63    | 86.1  | 129.8 | 114   | 146.8 | 122.9 |
| 110625961 | Rpa2              | 270  | 29.4  | DNA replication; Homologous recombination; Nucleotide excision repair; Fanconi anemia pathway; Mismatch repair                                                                                                                                                                                                                                         | 92.4  | 92.4  | 97.6  | 101.4 | 118.1 | 115.1 | 91.6  | 90.8  |
| 30410016  | Commd10           | 202  | 22.8  |                                                                                                                                                                                                                                                                                                                                                        | 100.8 | 103.2 | 98.3  | 96.5  | 94.9  | 97.8  | 106   | 102   |
| 226246593 | Actr10            | 417  | 46.2  |                                                                                                                                                                                                                                                                                                                                                        | 102.7 | 103.6 | 97.3  | 95.5  | 102.3 | 97.8  | 106.6 | 95    |
| 18079343  | Hars2             | 505  | 56.9  | Aminoacyl-tRNA biosynthesis                                                                                                                                                                                                                                                                                                                            | 95.5  | 106.9 | 106.8 | 106   | 104.2 | 100.9 | 100.8 | 99.5  |
| 124487443 | Phrf1             | 1682 | 184   |                                                                                                                                                                                                                                                                                                                                                        | 100.3 | 97.5  | 99    | 97.9  | 96.8  | 98    | 106.4 | 98.4  |
| 113374152 | Ikzf3             | 507  | 57.9  |                                                                                                                                                                                                                                                                                                                                                        | 108.4 | 117.4 | 103.7 | 111.8 | 90.9  | 84.8  | 99.6  | 102.3 |
| 6677777   | Rpl26;<br>Gm15772 | 145  | 17.2  | Ribosome                                                                                                                                                                                                                                                                                                                                               | 106.3 | 99.1  | 86.2  | 84.4  | 103.1 | 104.7 | 112.4 | 117.4 |
| 120407033 | Pded2             | 343  | 38.3  |                                                                                                                                                                                                                                                                                                                                                        | 89.7  | 100.2 | 81.3  | 87.8  | 109.2 | 106.6 | 118   | 117   |
| 22122585  | Srsf7             | 238  | 27.4  | Herpes simplex infection; Spliceosome                                                                                                                                                                                                                                                                                                                  | 99    | 100.3 | 94.2  | 96    | 95    | 94.6  | 107.3 | 104.6 |
| 61742810  | Zc3h13            | 1729 | 203.6 |                                                                                                                                                                                                                                                                                                                                                        | 103.5 | 104   | 100.7 | 99.8  | 106.2 | 96.3  | 104.7 | 106   |

|           |              |      |       |                                                                                                                                                                                                                                                                 |       |       |       |       |       |       |       |       |
|-----------|--------------|------|-------|-----------------------------------------------------------------------------------------------------------------------------------------------------------------------------------------------------------------------------------------------------------------|-------|-------|-------|-------|-------|-------|-------|-------|
| 6680231   | Hmgb3        | 200  | 23    |                                                                                                                                                                                                                                                                 | 104.4 | 109.4 | 102.9 | 100.9 | 98.5  | 100   | 96.8  | 102   |
| 21312422  | Naa50        | 168  | 19.3  |                                                                                                                                                                                                                                                                 | 75.7  | 76.6  | 95.1  | 100.2 | 127.9 | 130.1 | 113.2 | 108.8 |
| 46358062  | Tyms         | 307  | 34.9  | Metabolic pathways; Pyrimidine metabolism; Antifolate resistance; One carbon pool by folate                                                                                                                                                                     | 62    | 55.9  | 54    | 54.3  | 159.7 | 148.8 | 168   | 160.8 |
| 6754696   | Mif          | 115  | 12.5  | Phenylalanine metabolism; Tyrosine metabolism                                                                                                                                                                                                                   | 96.4  | 100.3 | 96.5  | 91.9  | 107.3 | 97.3  | 89.3  | 81.6  |
| 13384956  | Nosip        | 301  | 33.2  |                                                                                                                                                                                                                                                                 | 92.1  | 93    | 88.3  | 90.2  | 110.3 | 109   | 117.6 | 115.7 |
| 31981340  | Mpdu1        | 247  | 26.4  |                                                                                                                                                                                                                                                                 | 103.3 | 104.1 | 103.9 | 94.7  | 96    | 96.9  | 97.9  | 102.4 |
| 165377173 | Srsf4        | 491  | 56.2  | Herpes simplex infection; Spliceosome                                                                                                                                                                                                                           | 106.7 | 101.4 | 105.6 | 105   | 92    | 91.2  | 102.2 | 99.3  |
| 255958286 | Suclg1       | 346  | 36.1  | Citrate cycle (TCA cycle); Metabolic pathways; Propanoate metabolism; Carbon metabolism                                                                                                                                                                         | 110.2 | 112.8 | 119.2 | 116   | 92    | 91.2  | 81.7  | 85.3  |
| 21312660  | Gtf2e1       | 440  | 49.6  | Basal transcription factors; Epstein-Barr virus infection; Viral carcinogenesis                                                                                                                                                                                 | 87.4  | 95.9  | 97.7  | 107.2 | 111.9 | 120.5 | 107.9 | 119.5 |
| 34328268  | Tab1         | 502  | 54.6  | Herpes simplex infection; MAPK signaling pathway; TNF signaling pathway; NOD-like receptor signaling pathway; Toxoplasmosis; Epstein-Barr virus infection; Osteoclast differentiation; Toll-like receptor signaling pathway; NF-kappa B signaling pathway; Leis | 109.8 | 106.3 | 95.3  | 90.9  | 109.6 | 103.2 | 91.5  | 100.4 |
| 30424663  | Iba57        | 358  | 38.4  |                                                                                                                                                                                                                                                                 | 103.5 | 98.8  | 109.8 | 116.4 | 85.7  | 102.8 | 104.2 | 103.8 |
| 73532758  | Smg1         | 3658 | 409.5 | mRNA surveillance pathway                                                                                                                                                                                                                                       | 97.8  | 91.4  | 90.2  | 95    | 107.4 | 95.9  | 98.6  | 100.2 |
| 62988342  | Dapl1        | 107  | 11.8  |                                                                                                                                                                                                                                                                 | 127.7 | 126   | 131.1 | 128.8 | 76.4  | 77.1  | 79.3  | 81.6  |
| 407262980 | LOC101055915 | 240  | 28.2  |                                                                                                                                                                                                                                                                 | 75.5  | 76.8  | 77.7  | 80.1  | 113.5 | 114.8 | 130.4 | 126.4 |
| 38348528  | Ccdc58       | 144  | 16.7  |                                                                                                                                                                                                                                                                 | 114.1 | 112.5 | 108.1 | 108.9 | 106.4 | 97.5  | 84.4  | 91.1  |
| 125656150 | Hsd12        | 490  | 54.2  |                                                                                                                                                                                                                                                                 | 99.9  | 101.5 | 107.7 | 102.9 | 102.7 | 93.9  | 96.2  | 101.9 |
| 124517734 | Prex1        | 1650 | 184.8 | Chemokine signaling pathway                                                                                                                                                                                                                                     | 108.2 | 104.1 | 76.2  | 85.2  | 95    | 104.3 | 96.9  | 96.9  |
| 23956332  | Thoc1        | 657  | 75.4  | Spliceosome; RNA transport                                                                                                                                                                                                                                      | 86.7  | 94.5  | 96.7  | 97.3  | 108.6 | 109.3 | 99.8  | 108.4 |
| 285026450 | Lman1        | 517  | 57.8  | Protein processing in endoplasmic reticulum                                                                                                                                                                                                                     | 88.5  | 90.4  | 73    | 77.9  | 128   | 126   | 112.3 | 111.5 |
| 254587977 | Pold1        | 1105 | 123.7 | DNA replication; Homologous recombination; Metabolic pathways; HTLV-I infection; Purine metabolism; Nucleotide excision repair; Pyrimidine metabolism; Base excision repair; Mismatch repair                                                                    | 105.4 | 107   | 87.6  | 84.2  | 106.7 | 112.6 | 107.8 | 114.4 |
| 134031994 | Psm2         | 234  | 25.9  | Proteasome                                                                                                                                                                                                                                                      | 100.7 | 101.2 | 105.7 | 121.9 | 97.7  | 95.5  | 111.6 | 97.5  |
| 309266232 | Gm5908       | 148  | 16.7  |                                                                                                                                                                                                                                                                 | 67.4  | 45.3  | 111.8 | 114.4 | 128.6 | 170.2 | 114.4 | 113   |
| 21450103  | Usp3         | 520  | 58.8  |                                                                                                                                                                                                                                                                 | 106.9 | 107.3 | 105.3 | 109.1 | 93.5  | 101.1 | 88.2  | 85.5  |
| 126116587 | Inpp4a       | 939  | 105.5 | Metabolic pathways; Inositol phosphate metabolism; Phosphatidylinositol signaling system                                                                                                                                                                        | 108.7 | 115.4 | 91.8  | 91.3  | 92.9  | 95.7  | 94.5  | 93.9  |
| 164519045 | Usp4         | 962  | 108.3 |                                                                                                                                                                                                                                                                 | 91.1  | 90.7  | 85.6  | 88.8  | 112.7 | 110.3 | 96.6  | 101   |
| 6754908   | Nubp2        | 275  | 29.5  |                                                                                                                                                                                                                                                                 | 91.5  | 88.3  | 97.6  | 90.5  | 114.8 | 111.1 | 111.7 | 113.7 |
| 124494242 | Myo1c        | 1044 | 119.8 |                                                                                                                                                                                                                                                                 | 90.2  | 92.9  | 83.1  | 82.6  | 117   | 115.4 | 117.9 | 110.1 |
| 119508422 | Setd1a       | 1716 | 185.9 | Lysine degradation                                                                                                                                                                                                                                              | 112   | 97.3  | 94    | 94.6  | 96.3  | 100.4 | 97.4  | 104.5 |
| 50980303  | Mrps27       | 415  | 47.7  |                                                                                                                                                                                                                                                                 | 100.6 | 90.5  | 93    | 95.5  | 128.9 | 120.9 | 98.2  | 104   |
| 18699726  | Vps4a        | 437  | 48.9  | Endocytosis                                                                                                                                                                                                                                                     | 98.6  | 104.6 | 110.3 | 111.2 | 90.8  | 89.2  | 103.6 | 100   |

|           |                  |      |       |                                                                                                                                                                                                                                                                 |       |       |       |       |       |       |       |       |
|-----------|------------------|------|-------|-----------------------------------------------------------------------------------------------------------------------------------------------------------------------------------------------------------------------------------------------------------------|-------|-------|-------|-------|-------|-------|-------|-------|
| 71061460  | Entpd5           | 452  | 49.8  |                                                                                                                                                                                                                                                                 | 100.6 | 89.7  | 96.7  | 101.6 | 88.9  | 103.9 | 99.3  | 94    |
| 257196179 | Irf2bp2          | 570  | 59.3  |                                                                                                                                                                                                                                                                 | 93    | 85.6  | 91    | 103.1 | 106.7 | 101.7 | 121.8 | 126.2 |
| 255308881 | Ppp1r10          | 888  | 94.3  |                                                                                                                                                                                                                                                                 | 97.8  | 100.9 | 89.1  | 90.7  | 100.5 | 101.9 | 112.5 | 108   |
| 228480219 | Mesdc2;<br>Mesd  | 224  | 25.2  |                                                                                                                                                                                                                                                                 | 98    | 103.9 | 106.6 | 107.2 | 103.2 | 98    | 99.3  | 97.7  |
| 161016824 | Nfs1             | 459  | 50.5  | Thiamine metabolism; Metabolic pathways; Sulfur relay system                                                                                                                                                                                                    | 110.8 | 107   | 101.9 | 102.9 | 98.2  | 96.8  | 107   | 104.2 |
| 13385042  | Fam136a          | 138  | 15.7  |                                                                                                                                                                                                                                                                 | 111.4 | 115.8 | 104.6 | 104.1 | 100.3 | 90.2  | 101.2 | 100.5 |
| 171184423 | Pstpip1          | 415  | 47.5  | NOD-like receptor signaling pathway                                                                                                                                                                                                                             | 114.5 | 111.8 | 117.3 | 114.8 | 90.8  | 92.8  | 84.6  | 89.5  |
| 21450341  | Nae1             | 534  | 60.2  | Alzheimer's disease                                                                                                                                                                                                                                             | 96.9  | 101.6 | 91.9  | 101.8 | 102.6 | 99.6  | 108.2 | 90.2  |
| 160333568 | Case3            | 698  | 75.7  | mRNA surveillance pathway; RNA transport                                                                                                                                                                                                                        | 123.1 | 95.5  | 102.6 | 103.8 | 97.3  | 103.8 | 101.1 | 124.6 |
| 31560213  | Zfp830           | 363  | 40.6  |                                                                                                                                                                                                                                                                 | 110.3 | 116.9 | 106.3 | 107.5 | 90.4  | 88.4  | 101.6 | 98.4  |
| 32130521  | Nemf             | 1064 | 121.1 |                                                                                                                                                                                                                                                                 | 92.1  | 97.5  | 91.1  | 90.2  | 107.1 | 105   | 117.2 | 118.4 |
| 172072615 | Naa35            | 725  | 83.3  |                                                                                                                                                                                                                                                                 | 95.5  | 95.2  | 95.4  | 99    | 107.8 | 106.1 | 113.4 | 111.5 |
| 28626508  | Rheb             | 184  | 20.4  | mTOR signaling pathway; Phospholipase D signaling pathway; Insulin signaling pathway; Longevity regulating pathway; Thyroid hormone signaling pathway; PI3K-Akt signaling pathway; AMPK signaling pathway; Choline metabolism in cancer                         | 85.9  | 83.2  | 80.8  | 91    | 107.1 | 109.3 | 131   | 113.7 |
| 161016799 | Anxa4            | 319  | 35.9  |                                                                                                                                                                                                                                                                 | 97.8  | 95.8  | 78.6  | 80    | 77.7  | 83.1  | 84.4  | 83    |
| 110625667 | Lsm1             | 133  | 15.2  | RNA degradation                                                                                                                                                                                                                                                 | 96.8  | 103.2 | 98.9  | 106   | 98.7  | 117.4 | 90.5  | 97.1  |
| 285402377 | Strn3            | 712  | 77.7  |                                                                                                                                                                                                                                                                 | 112.6 | 102.1 | 101.9 | 104.7 | 90.8  | 99.2  | 85.7  | 92.8  |
| 160707899 | Surf1            | 306  | 34.8  |                                                                                                                                                                                                                                                                 | 128.8 | 142.7 | 96.6  | 93.3  | 102.6 | 100.4 | 97.8  | 84.4  |
| 75832031  | Hdde2            | 199  | 22.7  |                                                                                                                                                                                                                                                                 | 132.3 | 128.4 | 123.2 | 101.5 | 86.6  | 88.3  | 45.6  | 82    |
| 253314464 | Cog5             | 829  | 91.3  |                                                                                                                                                                                                                                                                 | 91.9  | 102   | 94.2  | 96.8  | 112.7 | 112.1 | 108.7 | 95.8  |
| 45598372  | Basp1            | 226  | 22.1  |                                                                                                                                                                                                                                                                 | 114.9 | 106.8 | 116.7 | 124.4 | 86.9  | 84.9  | 99.4  | 112   |
| 30520001  | Cggbp1           | 167  | 18.8  |                                                                                                                                                                                                                                                                 | 114.4 | 109.3 | 108.7 | 105   | 81.9  | 79    | 113.6 | 137.2 |
| 342307099 | Ahcyl2           | 613  | 66.9  | Metabolic pathways; Cysteine and methionine metabolism                                                                                                                                                                                                          | 103.5 | 111   | 92.6  | 96.7  | 108.5 | 80.6  | 98.7  | 159.6 |
| 145699091 | Syne2            | 6874 | 782.2 |                                                                                                                                                                                                                                                                 | 134   | 112.2 | 132.1 | 114.9 | 92.4  | 102.3 | 74.9  | 92.2  |
| 86439984  | Sfxn2            | 322  | 36.1  |                                                                                                                                                                                                                                                                 | 106.7 | 118.6 | 84.3  | 96.6  | 86.8  | 91.1  | 95.4  | 97.5  |
| 239937491 | Trim32           | 655  | 72    | Ubiquitin mediated proteolysis                                                                                                                                                                                                                                  | 94.1  | 96.7  | 86.7  | 90.6  | 106.2 | 110.1 | 116.8 | 108.4 |
| 21704010  | Tipr1            | 271  | 31.2  |                                                                                                                                                                                                                                                                 | 100   | 99.8  | 105.5 | 103.3 | 87.4  | 88.8  | 101.9 | 90.4  |
| 124486596 | Taf1             | 1902 | 215.7 |                                                                                                                                                                                                                                                                 | 114.2 | 115.5 | 90.5  | 92.7  | 98.7  | 103.5 | 97.3  | 103.7 |
| 46877055  | Fbxo3            | 480  | 55.2  |                                                                                                                                                                                                                                                                 | 105.4 | 96    | 87.2  | 98.6  | 116.9 | 105.7 | 113   | 86.6  |
| 6681095   | Cycs;<br>Gm10053 | 105  | 11.6  | Herpes simplex infection; Platinum drug resistance; p53 signaling pathway; Amyotrophic lateral sclerosis (ALS); Toxoplasmosis; Metabolic pathways; Small cell lung cancer; Tuberculosis; Hepatitis B; Huntington's disease; Sulfur metabolism; Apoptosis - mult | 124.3 | 123.8 | 120   | 112.9 | 75.6  | 75    | 87    | 88.7  |

|           |                                                     |      |       |                                                                                                                                                                                                                                                                 |       |       |       |       |       |       |       |       |
|-----------|-----------------------------------------------------|------|-------|-----------------------------------------------------------------------------------------------------------------------------------------------------------------------------------------------------------------------------------------------------------------|-------|-------|-------|-------|-------|-------|-------|-------|
| 149263037 | Cox5b;<br>LOC100046079;<br>Gm11273;<br>LOC102641600 | 129  | 13.8  | Metabolic pathways; Huntington's disease; Non-alcoholic fatty liver disease (NAFLD); Oxidative phosphorylation; Parkinson's disease; Alzheimer's disease; Cardiac muscle contraction                                                                            | 106.3 | 106.9 | 103.2 | 103.7 | 90    | 92.8  | 103.1 | 105.2 |
| 116734815 | Gba                                                 | 515  | 57.6  | Metabolic pathways; Lysosome; Sphingolipid metabolism; Other glycan degradation                                                                                                                                                                                 | 103.9 | 101.4 | 99.9  | 90    | 105   | 109.2 | 106.7 | 104.5 |
| 225703118 | Ado                                                 | 256  | 28.4  | Taurine and hypotaurine metabolism; Metabolic pathways                                                                                                                                                                                                          | 110.9 | 122.7 | 106.4 | 109.4 | 92.8  | 86.4  | 92.5  | 91.9  |
| 124339826 | Hspa1b                                              | 642  | 70.1  | Endocytosis; MAPK signaling pathway; Toxoplasmosis; Epstein-Barr virus infection; Spliceosome; Legionellosis; Influenza A; Antigen processing and presentation; Protein processing in endoplasmic reticulum; Estrogen signaling pathway; Measles; Longevity reg | 90.6  |       | 74.8  |       | 96.3  |       | 103.5 |       |
| 8567400   | Rpl27;<br>LOC108167922                              | 136  | 15.8  | Ribosome                                                                                                                                                                                                                                                        | 87.4  | 88.2  | 86    | 89.1  | 103   | 104   | 118.5 | 114.5 |
| 368711320 | Fam54b;<br>Mtf11                                    | 289  | 31.7  |                                                                                                                                                                                                                                                                 | 111.3 | 111.5 | 101.1 | 99    | 102.2 | 100.2 | 99.4  | 107.5 |
| 149271663 | Sms;<br>Gm14680;<br>Sms-ps<br>Lsm5;                 | 366  | 41.3  | Glutathione metabolism; Arginine and proline metabolism; Metabolic pathways; Cysteine and methionine metabolism; beta-Alanine metabolism                                                                                                                        | 110.2 | 109.9 | 102.3 | 97    | 94.2  | 95.1  | 88.3  | 95.7  |
| 407262510 | LOC100044729;<br>LOC102641341                       | 91   | 9.9   | RNA degradation; Spliceosome                                                                                                                                                                                                                                    | 124.2 | 120.3 | 101.7 | 96.2  | 91    | 87.4  | 91.1  | 93.8  |
| 110625924 | Rfc5                                                | 339  | 38.1  | DNA replication; Nucleotide excision repair; Mismatch repair                                                                                                                                                                                                    | 124.1 | 89.7  | 83.1  | 80.2  | 130.3 | 131.7 | 116.1 | 114.3 |
| 13994221  | Lsm2                                                | 131  | 14.8  | RNA degradation; Spliceosome                                                                                                                                                                                                                                    | 120.9 | 126.2 | 112   | 115.5 | 82.9  | 82.1  | 86.2  | 86.6  |
| 13384846  | Pno1                                                | 248  | 27.4  |                                                                                                                                                                                                                                                                 | 90.8  | 94.3  | 90.9  | 89.7  | 132.5 | 131.9 | 108.8 | 110.8 |
| 260763997 | Armc8                                               | 673  | 75.4  |                                                                                                                                                                                                                                                                 | 93.5  | 92.7  | 94.7  | 95.5  | 115   | 109.3 | 102.5 | 102.9 |
| 188219567 | Lyar                                                | 388  | 43.7  |                                                                                                                                                                                                                                                                 | 81.4  | 80.7  | 81.5  | 82.5  | 126.6 | 120.2 | 131.4 | 129.8 |
| 40254507  | Pgp                                                 | 321  | 34.5  | Metabolic pathways; Carbon metabolism; Glyoxylate and dicarboxylate metabolism                                                                                                                                                                                  | 110.7 | 108.4 | 100.9 | 105.1 | 93.9  | 104.5 | 97.7  | 100.8 |
| 31543773  | Sssca1                                              | 199  | 21.3  |                                                                                                                                                                                                                                                                 | 78.6  | 83    | 78.1  | 77.6  | 129   | 118.4 | 140.9 | 133.7 |
| 9790175   | Ppp4c                                               | 307  | 35.1  | Glucagon signaling pathway                                                                                                                                                                                                                                      | 107   | 105.9 | 95.4  | 98.3  | 103.7 | 100.7 | 100.2 | 102.1 |
| 29244577  | Sptlc1                                              | 473  | 52.5  | Metabolic pathways; Sphingolipid signaling pathway; Sphingolipid metabolism                                                                                                                                                                                     | 73.6  | 77.8  | 82.7  | 76.3  | 119.6 | 124   | 131.1 | 131.7 |
| 28461294  | Cdv3                                                | 281  | 29.7  |                                                                                                                                                                                                                                                                 | 100   | 106.6 | 124.4 | 97    | 146.6 | 98.1  | 101.5 | 122.5 |
| 166063959 | C330007P06Rik                                       | 222  | 25.6  |                                                                                                                                                                                                                                                                 | 101.4 | 100.9 | 106.4 | 106   | 91.1  | 91.8  | 98.8  | 101.2 |
| 133778978 | Igf2r                                               | 2483 | 273.6 | Endocytosis; Lysosome                                                                                                                                                                                                                                           | 107.4 | 104.1 | 99.3  | 93.7  | 108   | 115.7 | 92.2  | 95.3  |
| 83999999  | Gnpda2                                              | 276  | 31.1  | Metabolic pathways; Amino sugar and nucleotide sugar metabolism                                                                                                                                                                                                 | 110.8 | 102.8 | 101.5 | 103.1 | 93.9  | 100.2 | 106.9 | 92.5  |
| 78217391  | Sfswap                                              | 945  | 104.1 |                                                                                                                                                                                                                                                                 | 96.2  | 105.9 | 104.3 | 98.3  | 92.1  | 94.3  | 93.5  | 95.3  |

|           |                    |      |       |                                                                                                                                                                   |       |       |       |       |       |       |       |       |
|-----------|--------------------|------|-------|-------------------------------------------------------------------------------------------------------------------------------------------------------------------|-------|-------|-------|-------|-------|-------|-------|-------|
| 167234392 | Clasp2             | 1514 | 165.8 |                                                                                                                                                                   | 103.4 | 109.6 | 98.9  | 100.8 | 91.2  | 94.7  | 109.1 | 101.1 |
| 27370470  | Mtmr12             | 747  | 85.5  |                                                                                                                                                                   | 106.1 | 100.3 | 94.2  | 96.5  | 94.6  | 95.6  | 104.8 | 110.1 |
| 225903450 | Fam203a;<br>Hgh1   | 393  | 42.9  |                                                                                                                                                                   | 101.3 | 96.3  | 82.7  | 87.4  | 114.5 | 108.8 | 106.9 | 103.8 |
| 10190660  | Tfip11             | 838  | 96.2  |                                                                                                                                                                   | 102.5 | 106.4 | 99.7  | 95.7  | 102.6 | 98.6  | 106.5 | 106.9 |
| 6677779   | Rpl28              | 137  | 15.7  | Ribosome                                                                                                                                                          | 85.4  | 83.8  | 94    | 89.7  | 110.4 | 106   | 112.6 | 114.4 |
| 251823852 | Ago1;<br>Eif2c1    | 857  | 97.2  |                                                                                                                                                                   | 99    | 93.7  | 107.9 | 107   | 100.1 | 100   | 92.8  | 94.1  |
| 86990454  | Kif21b             | 1624 | 181.3 |                                                                                                                                                                   | 113.9 | 98    | 102.4 | 108.2 | 93    | 92.6  | 97.4  | 101   |
| 227430382 | Pum1               | 1186 | 126.3 |                                                                                                                                                                   | 101.2 | 100.3 | 101.2 | 95.8  | 107.8 | 107.1 | 98.9  | 98.5  |
| 408968123 | Cnot7              | 285  | 32.7  | RNA degradation                                                                                                                                                   | 97.5  | 94.7  | 101.2 | 93.6  | 103   | 120.9 | 99.4  | 107.2 |
| 13384904  | Mrps22             | 359  | 41.2  |                                                                                                                                                                   | 104.5 | 101.3 | 81    | 90.5  | 137   | 134.7 | 104.7 | 101.3 |
| 31981842  | Hmgcs1             | 520  | 57.5  | Valine, leucine and isoleucine degradation; Metabolic pathways; Terpenoid backbone biosynthesis; Butanoate metabolism; Synthesis and degradation of ketone bodies | 55.5  | 54.2  | 67.2  | 69    | 141.3 | 139.2 | 140.8 | 138.2 |
| 28173566  | Paox               | 504  | 55.4  | Peroxisome                                                                                                                                                        | 104.8 | 89    | 95.3  | 97    | 112.1 | 99.3  | 89.5  | 100.3 |
| 58037187  | Ttc39b             | 617  | 70.2  |                                                                                                                                                                   | 77.9  | 71    | 80    | 80.9  | 136.5 | 139.4 | 126.6 | 134.5 |
| 30794412  | Taf15              | 557  | 58.6  | Basal transcription factors; Transcriptional misregulation in cancer                                                                                              | 99.4  | 102.6 | 99.6  | 101.9 | 92.9  | 93.1  | 118.8 | 105.7 |
| 34328471  | Rala               | 206  | 23.5  | Phospholipase D signaling pathway; Ras signaling pathway; Rap1 signaling pathway; Pathways in cancer; Pancreatic cancer                                           | 108.3 | 105.1 | 101.5 | 103.9 | 98.9  | 93.1  | 67.9  | 60.9  |
| 6677905   | Glg1               | 1175 | 133.6 | Cell adhesion molecules (CAMs)                                                                                                                                    | 86.1  | 87.4  | 80.8  | 87.9  | 94    | 97.7  | 113.3 | 114.2 |
| 33563274  | Rnf2               | 336  | 37.6  |                                                                                                                                                                   | 115.2 | 94.9  | 88.2  | 86.8  | 107.7 | 110.7 | 103.1 | 110.8 |
| 58037361  | Crte2              | 692  | 73.2  | Insulin resistance; HTLV-I infection; PI3K-Akt signaling pathway; AMPK signaling pathway; Glucagon signaling pathway                                              | 108.2 | 110.3 | 108.6 | 103.8 | 103.7 | 100.6 | 102.5 | 97    |
| 225579157 | Trim12c            | 497  | 57.8  |                                                                                                                                                                   | 91.2  | 94.8  | 65.3  | 62.8  | 114   | 107.7 | 116.8 | 112.1 |
| 254939640 | Vps16              | 839  | 94.8  |                                                                                                                                                                   | 140.8 | 153.5 | 89.3  | 96.5  | 98.1  | 103.8 | 110   | 101.6 |
| 163954951 | Cirh1a;<br>Utp4    | 686  | 76.9  | Ribosome biogenesis in eukaryotes                                                                                                                                 | 81    | 91.7  | 85.6  | 89.9  | 120.1 | 116.2 | 123.7 | 109.5 |
| 225543273 | Map7d1;<br>Mtap7d1 | 846  | 93.2  |                                                                                                                                                                   | 90.7  | 91.9  | 84.3  | 85.4  | 95.3  | 98.1  | 114.4 | 104.3 |
| 47059151  | Glipr2             | 154  | 17.1  |                                                                                                                                                                   | 101.3 | 95    | 105.7 | 96.9  | 99.3  | 97    | 93.1  | 94    |
| 6679421   | Por                | 678  | 77    |                                                                                                                                                                   | 97.3  | 99    | 92.6  | 89.1  | 103.9 | 104.6 | 103.3 | 103.5 |
| 27754140  | Vta1               | 309  | 33.9  | Endocytosis                                                                                                                                                       | 108.1 | 107.1 | 102.2 | 100.6 | 98.6  | 104.1 | 97.2  | 85.3  |
| 13384880  | Tma16              | 221  | 25.8  |                                                                                                                                                                   | 88.7  | 94.9  | 88.1  | 100.9 | 100   | 113.6 | 87.6  | 104.2 |
| 449784892 | Acy1               | 408  | 45.8  | Metabolic pathways; Biosynthesis of amino acids; 2-Oxocarboxylic acid metabolism; Arginine biosynthesis                                                           | 106.2 | 96.7  | 101.9 | 102.6 | 96.6  | 93.3  | 94.2  | 88    |
| 21313438  | Exoc2              | 924  | 103.9 | Ras signaling pathway                                                                                                                                             | 96.2  | 100.4 | 87.5  | 95.3  | 118.1 | 112.7 | 95.4  | 102.7 |
| 60218877  | Abcd3              | 659  | 75.4  | ABC transporters; Peroxisome                                                                                                                                      | 89.4  | 88.8  | 79.4  | 82    | 117.9 | 110.6 | 120   | 119   |
| 309268993 | Srcap              | 3237 | 346   |                                                                                                                                                                   | 110.7 | 112.2 | 99.6  | 102.7 | 96    | 101.9 | 104.7 | 97.7  |

|           |                               |      |      |                                                                                                                                                                                                                                                                             |       |       |       |       |       |       |       |       |
|-----------|-------------------------------|------|------|-----------------------------------------------------------------------------------------------------------------------------------------------------------------------------------------------------------------------------------------------------------------------------|-------|-------|-------|-------|-------|-------|-------|-------|
| 8393156   | Clpp                          | 272  | 29.8 |                                                                                                                                                                                                                                                                             | 105.6 | 101   | 94    | 94.5  | 101   | 100.6 | 109.4 | 110.8 |
| 149271901 | LOC100045848;<br>LOC102642043 | 144  | 16.9 |                                                                                                                                                                                                                                                                             | 110.8 | 108.3 | 106.8 | 109.5 | 90.1  | 88.1  | 98.2  | 98.1  |
| 40254514  | Gapvd1                        | 1437 | 160  |                                                                                                                                                                                                                                                                             | 104.2 | 91.6  | 97.1  | 92.9  | 104.3 | 110.4 | 103.6 | 115.9 |
| 21312776  | Tprgl                         | 266  | 29.8 |                                                                                                                                                                                                                                                                             | 102.9 | 98.7  | 101   | 105.5 | 84.8  | 93.4  | 85.7  | 88.8  |
| 31981603  | Bsdc1                         | 427  | 46.9 |                                                                                                                                                                                                                                                                             | 121.8 | 115.6 | 87.2  | 99    | 101.3 | 97.7  | 86.7  | 86.5  |
| 21313408  | Abi3                          | 367  | 39.1 |                                                                                                                                                                                                                                                                             | 123.4 | 116.4 | 112.8 | 116.7 | 89.6  | 91.5  | 83.2  | 85.7  |
| 47059051  | Ppp2r5a                       | 486  | 56.3 | mRNA surveillance pathway; Dopaminergic synapse; Oocyte meiosis; Sphingolipid signaling pathway; PI3K-Akt signaling pathway; AMPK signaling pathway; Adrenergic signaling in cardiomyocytes                                                                                 | 111.5 | 106.1 | 103.5 | 102.7 | 83.6  | 80.1  | 86.8  | 95.6  |
| 21704122  | Pdk3                          | 415  | 47.9 |                                                                                                                                                                                                                                                                             | 90    | 87.2  | 99.2  | 94.5  | 107.5 | 116   | 105.3 | 115.6 |
| 160298207 | Gnpat                         | 678  | 76.8 | Glycerophospholipid metabolism; Peroxisome                                                                                                                                                                                                                                  |       | 98.4  |       | 85    |       | 105.6 |       | 90    |
| 158937240 | Timm10                        | 90   | 10.3 |                                                                                                                                                                                                                                                                             | 98.3  | 109.9 | 98.4  | 100.5 | 102.2 | 98.7  | 119.7 | 107.6 |
| 13384788  | Cdk5rap3                      | 503  | 57   |                                                                                                                                                                                                                                                                             | 101.9 | 101.9 | 98.1  | 103.3 | 98.4  | 97.2  | 91.4  | 96.5  |
| 119637823 | Hnrnp3                        | 346  | 36.8 |                                                                                                                                                                                                                                                                             | 101.7 | 105.6 | 99.2  | 95.6  | 95    | 92.2  | 105.5 | 106.1 |
| 31560433  | Snx3                          | 162  | 18.8 | Endocytosis                                                                                                                                                                                                                                                                 | 104   | 113.6 | 104.2 | 103.7 | 110.8 | 108.9 | 120.5 | 125   |
| 40789280  | Faf1                          | 649  | 73.8 |                                                                                                                                                                                                                                                                             | 105.5 | 107.2 | 95.3  | 96.4  | 108.1 | 108.8 | 103.9 | 105.2 |
| 29150272  | Sec13                         | 322  | 35.5 | mTOR signaling pathway; RNA transport; Protein processing in endoplasmic reticulum                                                                                                                                                                                          | 101   | 95.2  | 95.8  | 103.1 | 98.5  | 97    | 93.8  | 99.9  |
| 266458391 | Kras                          | 188  | 21.5 | Oxytocin signaling pathway; ErbB signaling pathway; FoxO signaling pathway; Acute myeloid leukemia; AGE-RAGE signaling pathway in diabetic complications; mTOR signaling pathway; Cholinergic synapse; T cell receptor signaling pathway; Phospholipase D signaling pathway | 90.6  | 87.9  | 94.8  | 93.6  | 94    | 100.5 | 111.8 | 111.8 |
| 29568082  | Gmpr2                         | 348  | 38   | Purine metabolism                                                                                                                                                                                                                                                           | 97.3  | 97    | 105.3 | 101   | 99.3  | 98.3  | 97.7  | 102.2 |
| 34328467  | Ripk1                         | 656  | 74.8 | TNF signaling pathway; NOD-like receptor signaling pathway; Epstein-Barr virus infection; RIG-I-like receptor signaling pathway; Toll-like receptor signaling pathway; Hepatitis C; Cytosolic DNA-sensing pathway; NF-kappa B signaling pathway; Apoptosis                  | 103.2 | 105   | 102.9 | 113.2 | 100.8 | 106.8 | 100.6 | 100.8 |
| 158711747 | Pfdn4                         | 134  | 15.2 |                                                                                                                                                                                                                                                                             | 108.1 | 106.7 | 100.6 | 103   | 92.7  | 94.7  | 110.1 | 116.7 |
| 33859514  | Bcat2                         | 393  | 44.1 | Valine, leucine and isoleucine degradation; Metabolic pathways; Biosynthesis of amino acids; 2-Oxocarboxylic acid metabolism; Cysteine and methionine metabolism; Valine, leucine and isoleucine biosynthesis; Pantothenate and CoA biosynthesis                            | 113.5 | 110.7 | 92.2  | 96.2  | 112.1 | 108.9 | 91.9  | 93.1  |
| 13128964  | Rab27a                        | 221  | 25   |                                                                                                                                                                                                                                                                             | 97.4  | 99.8  | 96.9  | 92.7  | 106.6 | 105.1 | 95.2  | 100.9 |
| 114842377 | Strbp                         | 672  | 73.7 |                                                                                                                                                                                                                                                                             | 98.8  | 101.2 | 83.9  | 82.2  | 113.2 | 111   | 119.9 | 120.8 |
| 165972333 | Brd3                          | 726  | 79.7 |                                                                                                                                                                                                                                                                             | 98.2  | 100.7 | 93.4  | 92.2  | 103.8 | 98.7  | 106.6 | 103.6 |
| 6679443   | Ppm1a                         | 382  | 42.4 | MAPK signaling pathway                                                                                                                                                                                                                                                      | 104.5 | 108.5 | 95.3  | 98.8  | 93.3  | 96.6  | 96    | 100   |



|           |                               |      |       |                                                                                                                                                          |       |       |       |       |       |       |       |       |
|-----------|-------------------------------|------|-------|----------------------------------------------------------------------------------------------------------------------------------------------------------|-------|-------|-------|-------|-------|-------|-------|-------|
| 13277354  | Ubxn6                         | 442  | 49.8  | Protein processing in endoplasmic reticulum                                                                                                              | 110.9 | 112.7 | 102.5 | 104.3 | 92.4  | 90.5  | 94.9  | 98.6  |
| 124486905 | Rsf1                          | 1441 | 161.7 |                                                                                                                                                          | 98.2  | 93    | 98    | 98.6  | 98.5  | 105.2 | 106.6 | 103.6 |
| 358248335 | Smc5                          | 1101 | 128.7 |                                                                                                                                                          | 110.2 |       | 99.3  |       | 103.7 |       | 98.5  |       |
| 27229283  | Rexo2                         | 237  | 26.7  | Ribosome biogenesis in eukaryotes                                                                                                                        | 98.3  | 102.7 | 91.3  | 94.2  | 106   | 103.2 | 105.6 | 109   |
| 30794386  | Tram1                         | 374  | 43    | Protein processing in endoplasmic reticulum                                                                                                              | 101.1 | 104.5 | 94.6  | 95.3  | 106.6 | 106.5 | 77    | 83.4  |
| 12963571  | Ndufa7                        | 113  | 12.6  | Metabolic pathways; Huntington's disease; Non-alcoholic fatty liver disease (NAFLD); Oxidative phosphorylation; Parkinson's disease; Alzheimer's disease | 113.6 | 107   | 112.7 | 106.4 | 91.1  | 87.1  | 100.5 | 102.3 |
| 12232371  | Hells                         | 821  | 95.1  |                                                                                                                                                          | 60    | 60.7  | 51.1  | 55.3  | 161   | 167.1 | 183.2 | 173.8 |
| 226530884 | Pcmt1                         | 285  | 30.4  |                                                                                                                                                          | 117.2 | 122.6 | 113.4 | 118.2 | 76.1  | 71.6  | 85.3  | 84.3  |
| 255683303 | Fcho1                         | 873  | 95.1  |                                                                                                                                                          | 94.6  | 98.7  | 90.3  | 90.8  | 100   | 92.5  | 104   | 107   |
| 22779883  | Tor2a                         | 321  | 35.9  |                                                                                                                                                          | 103.8 | 106.4 | 99.4  | 98.8  | 101.7 | 102   | 93.9  | 105.5 |
| 46559745  | Hook3                         | 718  | 83.2  |                                                                                                                                                          | 100.7 | 98.8  | 97    | 92.9  | 101   | 101.2 | 107.5 | 109.1 |
| 160333463 | Vrk2                          | 503  | 58.1  |                                                                                                                                                          | 99.2  | 88.7  | 92.1  | 98.3  | 95.6  | 100.6 | 119.2 | 109.4 |
| 21312662  | Cep97                         | 856  | 94.6  |                                                                                                                                                          | 88.6  | 99.3  | 99.5  | 97.6  | 104.7 | 94.6  | 98.8  | 98.4  |
| 31559988  | Stk17b                        | 372  | 42    |                                                                                                                                                          | 100   | 102   | 117.2 | 104.8 | 84.1  | 93.2  | 93.6  | 92.8  |
| 74271886  | Cyp20a1                       | 462  | 52.1  |                                                                                                                                                          | 91.9  | 94.5  | 90.8  | 87.7  | 112.3 | 113   | 110.4 | 118.9 |
| 124487299 | Ralgapb                       | 1491 | 166.1 |                                                                                                                                                          | 102.1 | 103.2 | 95.6  | 104.9 | 104.9 | 105.4 | 106.2 | 96.7  |
| 51783963  | Crtc1                         | 630  | 66.9  | HTLV-I infection                                                                                                                                         | 124.5 | 116.3 | 126.3 | 112.9 | 86.9  | 88.2  | 86.6  | 94.2  |
| 31980937  | Pef1                          | 275  | 29.2  |                                                                                                                                                          | 111.6 | 116.7 | 112   | 106.9 | 94    | 97.5  | 76.8  | 64.9  |
| 31982063  | Ccbl1;<br>Kvat1               | 424  | 47.5  | Tryptophan metabolism; Metabolic pathways;<br>Selenocompound metabolism; Chemical carcinogenesis                                                         | 104   | 115.2 | 107.4 | 96.8  | 97.1  | 103.1 | 95.9  | 89.8  |
| 115270977 | Med14                         | 1459 | 160.9 | Thyroid hormone signaling pathway                                                                                                                        | 99.5  | 101.7 | 99    | 91.4  | 107.6 | 99.5  | 113.8 | 94.3  |
| 82546883  | 2700094K<br>13Rik;<br>Selenoh | 116  | 13    |                                                                                                                                                          | 116.5 | 113.8 | 140.5 | 140.3 | 70.5  | 74.5  | 78.2  | 77.5  |
| 134152669 | Arglu1                        | 271  | 32.9  |                                                                                                                                                          | 95.7  | 98    | 93.1  | 90.6  | 98    | 99.8  | 110.1 | 114.8 |
| 261824025 | Sp4                           | 782  | 81.9  |                                                                                                                                                          | 106.9 | 93.7  | 108.5 | 104.8 | 111.1 | 108   | 87.7  | 98.8  |
| 21312950  | Ndufs7                        | 224  | 24.7  | Metabolic pathways; Huntington's disease; Non-alcoholic fatty liver disease (NAFLD); Oxidative phosphorylation; Parkinson's disease; Alzheimer's disease | 120.7 | 110.7 | 105.8 | 109   | 101   | 110.6 | 54.2  | 51.3  |
| 39930579  | Yars2                         | 472  | 52.6  | Aminoacyl-tRNA biosynthesis                                                                                                                              | 95    | 117.6 | 90.3  | 97.2  | 115.6 | 110.9 | 116.3 | 108.7 |
| 13385396  | Ifrd2                         | 441  | 47.7  |                                                                                                                                                          | 102.4 | 98.4  | 86.8  | 88.6  | 110.8 | 115.3 | 116.1 | 111.5 |
| 13507666  | Lactb                         | 551  | 60.7  |                                                                                                                                                          | 107.7 | 105.5 | 100   | 104.9 | 93.3  | 93.9  | 98.4  | 94.2  |
| 156231075 | Arfgef1                       | 1846 | 208.4 | Endocytosis                                                                                                                                              | 93.4  | 96.6  | 89.3  | 88.5  | 109.5 | 109.3 | 107   | 106.1 |
| 82546826  | Foxk1                         | 719  | 74.9  |                                                                                                                                                          | 113.3 | 110.4 | 98.3  | 110.3 | 88.7  | 90.4  | 92.5  | 86.7  |
| 167466258 | Cul4a                         | 759  | 87.7  | Ubiquitin mediated proteolysis; Nucleotide excision repair                                                                                               | 95.7  | 93.4  | 96.8  | 101.3 | 104.6 | 99.2  | 107.6 | 104.6 |
| 31541796  | Uck11                         | 548  | 60.8  | Metabolic pathways; Pyrimidine metabolism; Drug metabolism - other enzymes                                                                               | 108.4 | 100.3 | 107   | 97    | 99.2  | 101.4 | 88.3  | 102.6 |
| 40254249  | Nfrkb                         | 1296 | 138.7 |                                                                                                                                                          | 108   | 107   | 96.3  | 103.9 | 102.4 | 103.3 | 107.3 | 102.1 |
| 31981178  | Ngly1                         | 651  | 74.2  | Protein processing in endoplasmic reticulum                                                                                                              | 107.2 | 106.6 | 104.9 | 106.8 | 91.7  | 91.9  | 92.6  | 94.7  |

|           |                                     |      |       |                                                                                                                                                                |       |       |       |       |       |       |       |       |
|-----------|-------------------------------------|------|-------|----------------------------------------------------------------------------------------------------------------------------------------------------------------|-------|-------|-------|-------|-------|-------|-------|-------|
| 90093343  | 1700052N<br>19Rik;<br>Armt1         | 439  | 50.5  |                                                                                                                                                                | 110.8 | 108   | 103   | 94.4  | 112.7 | 96.1  | 88.9  | 100.5 |
| 31560120  | Pdcl3                               | 240  | 27.6  |                                                                                                                                                                | 101.9 | 93.5  | 87.5  | 90.4  | 101.2 | 105.1 | 116.7 | 130.4 |
| 226371677 | Adar                                | 1178 | 130.4 | Influenza A; Cytosolic DNA-sensing pathway; Measles                                                                                                            | 128.8 | 107.8 | 87.5  | 97.6  | 100   | 106.9 | 98.2  | 99.3  |
| 156546892 | Prpf39                              | 665  | 77.9  |                                                                                                                                                                | 95.3  | 94.3  | 89.1  | 89.9  | 110.9 | 113.4 | 114.9 | 110.9 |
| 237820699 | Mocs3                               | 460  | 49.3  | Sulfur relay system                                                                                                                                            | 102.4 | 108.3 | 96.1  | 113.4 | 97.8  | 101   | 97.9  | 98.1  |
| 13385576  | 3110040N<br>11Rik                   | 126  | 13.2  |                                                                                                                                                                | 123   | 115.7 | 111.7 | 101.2 | 82    | 84.3  | 95    | 103.3 |
| 315013583 | Daxx                                | 740  | 81.5  | Herpes simplex infection; MAPK signaling pathway;<br>Amyotrophic lateral sclerosis (ALS); Apoptosis                                                            | 101.4 | 112.7 | 95.9  | 108.2 | 98.3  | 86.9  | 102.6 | 100.7 |
| 7106289   | Dhfr                                | 187  | 21.6  | Metabolic pathways; Antifolate resistance; Folate<br>biosynthesis; One carbon pool by folate                                                                   | 71.9  | 53.9  | 63.2  | 58.7  | 156   | 153.7 | 140.9 | 151.4 |
| 30023855  | Eny2                                | 101  | 11.5  |                                                                                                                                                                | 112.5 | 109.3 | 102.2 | 99.1  | 96.5  | 93.7  | 108.6 | 107.9 |
| 126116585 | Krt1                                | 637  | 65.6  |                                                                                                                                                                | 76.4  | 80.6  | 83.4  | 94.3  | 89.3  | 107.2 | 102.3 | 91.3  |
| 9910568   | Stap1                               | 297  | 34.6  |                                                                                                                                                                | 86.1  | 95.7  | 76.7  | 84.3  | 122.4 | 111.8 | 120.7 | 120.6 |
| 13386100  | Ndufa5                              | 116  | 13.4  |                                                                                                                                                                | 109.8 | 117.8 | 92.7  | 93.6  | 91.2  | 96.3  | 109.3 | 112.4 |
| 55742803  | Naa25                               | 972  | 111.6 |                                                                                                                                                                | 89.4  | 82.9  | 90.1  | 85.9  | 118   | 119.9 | 114.4 | 120.7 |
| 13386034  | Rps13;<br>Rps13-<br>ps1;<br>LOC1026 | 151  | 17.2  | Ribosome                                                                                                                                                       | 91.1  | 89.5  | 93.5  | 91.4  | 105.6 | 107.3 | 114.7 | 115.5 |
| 154090953 | Ctr9                                | 1173 | 133.3 |                                                                                                                                                                | 101.7 | 108.2 | 109.2 | 96.3  | 108.6 | 117.8 | 83.1  | 65.2  |
| 21703976  | Dak; Tkfc                           | 578  | 59.7  | Metabolic pathways; RIG-I-like receptor signaling pathway;<br>Carbon metabolism; Glycerolipid metabolism; Fructose and<br>mannose metabolism                   | 111   | 99.9  | 100.1 | 112.5 | 100.2 | 112.4 | 101.1 | 91.7  |
| 15809012  | Prcc                                | 491  | 52.3  | Transcriptional misregulation in cancer                                                                                                                        | 111   | 109.4 | 102.9 | 112.6 | 91    | 83.7  | 98.1  | 99.4  |
| 58037109  | Ndufb10                             | 176  | 21    | Metabolic pathways; Huntington's disease; Non-alcoholic<br>fatty liver disease (NAFLD); Oxidative phosphorylation;<br>Parkinson's disease; Alzheimer's disease | 108.4 | 103.9 | 101.1 | 99.5  | 101.2 | 100.5 | 79.3  | 87.8  |
| 157817436 | Bach2                               | 839  | 91.8  |                                                                                                                                                                | 89.3  | 94.7  | 86.6  | 94.2  | 108.3 | 101.3 | 112.5 | 93.8  |
| 134053873 | 2410018<br>M08Rik;<br>Zbed5         | 756  | 84.2  |                                                                                                                                                                | 115.8 | 129.7 | 92    | 89.1  | 87.4  | 84.7  | 102.7 | 112.8 |
| 18699998  | Cdk9                                | 372  | 42.7  | Transcriptional misregulation in cancer                                                                                                                        | 94.5  | 92.4  | 95.8  | 92.9  | 101.4 | 102   | 109.3 | 106.7 |
| 33636709  | Ppp4r2                              | 417  | 46.4  |                                                                                                                                                                | 105.2 | 104.2 | 97.3  | 97.4  | 107.3 | 97.8  | 104.6 | 114.3 |
| 209862947 | Eif2d                               | 570  | 62.8  |                                                                                                                                                                | 106   | 109.4 | 99    | 97.1  | 103.4 | 99.9  | 97.9  | 97.2  |
| 21362307  | Zfp622                              | 476  | 53.4  |                                                                                                                                                                | 90.3  | 120.5 | 99.1  | 94.6  | 119.1 | 105.4 | 106.3 | 106.8 |
| 28202007  | Metap1                              | 386  | 43.2  |                                                                                                                                                                | 90.1  | 86.7  | 87.9  | 85.7  | 112.8 | 114.3 | 117.3 | 120.2 |
| 21450105  | BC021614<br>; Gstp3                 | 210  | 24.2  |                                                                                                                                                                | 115.4 | 117.3 | 106.7 | 119.4 | 75.6  | 75.3  | 94.6  | 81.8  |

|           |           |      |       |                                                                                                                                                                                                                                                                 |       |       |       |       |       |       |       |       |
|-----------|-----------|------|-------|-----------------------------------------------------------------------------------------------------------------------------------------------------------------------------------------------------------------------------------------------------------------|-------|-------|-------|-------|-------|-------|-------|-------|
| 13937391  | Gnb2      | 340  | 37.3  | Morphine addiction; Cholinergic synapse; Retrograde endocannabinoid signaling; Dopaminergic synapse; Ras signaling pathway; GABAergic synapse; Chemokine signaling pathway; Glutamatergic synapse; Pathways in cancer; Alcoholism; PI3K-Akt signaling pathway   | 104.5 | 102.3 | 95.2  | 125.7 | 86.3  | 87    | 86.5  | 83.3  |
| 31559926  | Zadh2     | 377  | 40.5  |                                                                                                                                                                                                                                                                 | 110.7 | 117.2 | 96.2  | 98.8  | 103   | 114   | 97    | 96.5  |
| 13385098  | Ntpcr     | 190  | 20.7  | Thiamine metabolism; Metabolic pathways; Purine metabolism                                                                                                                                                                                                      | 102.7 | 109.9 | 100.1 | 98.4  | 92.4  | 88.6  | 95.2  | 98    |
| 114326502 | Pxn       | 591  | 64.5  | Leukocyte transendothelial migration; Regulation of actin cytoskeleton; VEGF signaling pathway; Focal adhesion; Chemokine signaling pathway; Proteoglycans in cancer; Viral carcinogenesis; Bacterial invasion of epithelial cells                              | 132.1 | 125.9 | 99.3  | 93.2  | 79.7  | 84.9  | 75.5  | 108.4 |
| 499591031 | Pih1d1    | 290  | 32.2  |                                                                                                                                                                                                                                                                 | 88.6  | 88.4  | 91.8  | 88.4  | 118.5 | 116.2 | 107.5 | 114.1 |
| 54607171  | Krt6a     | 553  | 59.3  |                                                                                                                                                                                                                                                                 | 60.6  |       | 67.9  |       | 257   |       | 76.5  |       |
| 119703751 | Itk       | 619  | 71.5  |                                                                                                                                                                                                                                                                 | 96    | 100.6 | 88.7  | 91.1  | 103.3 | 106.4 | 108.6 | 105   |
| 30424587  | Nudcd3    | 363  | 40.9  |                                                                                                                                                                                                                                                                 | 94.9  | 91.7  | 107.6 | 112.3 | 108.9 | 108.1 | 115.7 | 116.9 |
| 262118202 | Eif4enif1 | 983  | 107.9 |                                                                                                                                                                                                                                                                 | 80    | 82.8  | 77    | 79.2  | 133.5 | 125.4 | 125.1 | 126   |
| 94400775  | Rbpj      | 526  | 58.5  | Epstein-Barr virus infection; Notch signaling pathway; Th1 and Th2 cell differentiation; Viral carcinogenesis                                                                                                                                                   | 93.1  | 92.4  | 84.6  | 78.5  | 113.1 | 120.6 | 119.2 | 125.4 |
| 6755911   | Txn1      | 105  | 11.7  | NOD-like receptor signaling pathway                                                                                                                                                                                                                             | 88.1  | 91.3  | 97.9  | 99.9  | 108.6 | 104.1 | 117.3 | 118.1 |
| 81295418  | Nfatc2    | 927  | 100   | Oxytocin signaling pathway; Wnt signaling pathway; T cell receptor signaling pathway; VEGF signaling pathway; Hepatitis B; Axon guidance; HTLV-1 infection; Osteoclast differentiation; B cell receptor signaling pathway; cGMP-PKG signaling pathway; Natural  | 104.7 | 105.8 | 102.9 | 99.7  | 95    | 90.8  | 92    | 97.1  |
| 148229140 | Arfgef2   | 1792 | 202.1 | Endocytosis                                                                                                                                                                                                                                                     | 106   | 105.4 | 108.5 | 88.4  | 103.2 | 106.7 | 98.1  | 106.7 |
| 33469123  | Asns      | 561  | 64.2  | Metabolic pathways; Alanine, aspartate and glutamate metabolism                                                                                                                                                                                                 | 42.3  | 47.6  | 61.9  | 61    | 160.2 | 157.2 | 176.6 | 169.7 |
| 124487127 | Exosc7    | 291  | 31.8  | RNA degradation                                                                                                                                                                                                                                                 | 109.9 | 102.9 | 93.6  | 99.7  | 93.8  | 102.7 | 103.9 | 97.7  |
| 28849881  | Ppm1f     | 452  | 49.6  |                                                                                                                                                                                                                                                                 | 106.2 | 106.5 | 102.1 | 98.4  | 100.1 | 96.7  | 97.7  | 94.9  |
| 226246573 | Pik3cg    | 1102 | 126.3 | Oxytocin signaling pathway; ErbB signaling pathway; FoxO signaling pathway; Leukocyte transendothelial migration; Acute myeloid leukemia; AGE-RAGE signaling pathway in diabetic complications; mTOR signaling pathway; Cholinergic synapse; Platinum drug resi | 102.9 | 106.7 | 120.8 | 115   | 102.9 | 98.3  | 92.5  | 94.7  |
| 21312968  | Ssr3      | 185  | 21.1  | Protein processing in endoplasmic reticulum                                                                                                                                                                                                                     | 88.6  | 93.8  | 72.5  | 76    | 125.6 | 127.7 | 106.2 | 106.2 |
| 85719309  | Fgd3      | 733  | 80.6  | Regulation of actin cytoskeleton                                                                                                                                                                                                                                | 108.8 | 109.9 | 106   | 111.7 | 89.4  | 88    | 93.1  | 90.6  |
| 114051171 | Trmt11    | 460  | 52.9  |                                                                                                                                                                                                                                                                 | 96.8  | 103.5 | 93.5  | 103.3 | 97.8  | 94.2  | 111.8 | 100.4 |
| 160333193 | Eci2      | 391  | 43.2  | Fatty acid degradation; Peroxisome                                                                                                                                                                                                                              | 105.9 | 115.7 | 108.3 | 100.8 | 91.1  | 91.5  | 89    | 94.5  |
| 16716475  | Ddx50     | 734  | 82.1  |                                                                                                                                                                                                                                                                 | 79.7  | 87.5  | 94.9  | 90.8  | 123.8 | 122   | 117.7 | 118.7 |
| 485464582 | Rps6ka4   | 773  | 85.6  | MAPK signaling pathway; TNF signaling pathway                                                                                                                                                                                                                   | 117.2 | 118.5 | 110.4 | 109.8 | 87.6  | 90.3  | 88.3  | 86.4  |
| 269784762 | Cbr4      | 236  | 25.4  |                                                                                                                                                                                                                                                                 | 108.5 | 102.9 | 92.1  | 108   | 89.1  | 102.3 | 94    | 98.1  |
| 6678682   | Lgals1    | 135  | 14.9  |                                                                                                                                                                                                                                                                 | 129.3 | 133.1 | 93.2  | 90.6  | 69.5  | 70    | 79.1  | 78.9  |

|           |                   |      |       |                                                                                                                                                                                          |       |       |       |       |       |       |       |       |
|-----------|-------------------|------|-------|------------------------------------------------------------------------------------------------------------------------------------------------------------------------------------------|-------|-------|-------|-------|-------|-------|-------|-------|
| 159032025 | Bcl7b             | 202  | 22.2  |                                                                                                                                                                                          | 121.5 | 121.8 | 114.1 | 129.7 | 84.5  | 81    | 89.5  | 79.3  |
| 171543875 | Nedd1             | 660  | 71.2  |                                                                                                                                                                                          | 103.8 | 90.4  | 97    | 93.9  | 104.5 | 112.2 | 109.5 | 93.7  |
| 268370185 | Stx5a             | 355  | 39.7  | SNARE interactions in vesicular transport                                                                                                                                                | 100   | 85.9  | 98.7  | 105.2 | 101.2 | 102.4 | 90.4  | 95    |
| 270265917 | Syap1             | 365  | 41.3  |                                                                                                                                                                                          | 104.8 | 102.9 | 95.1  | 96.3  | 90.9  | 90.4  | 105.4 | 112.6 |
| 13385932  | Ufm1              | 85   | 9.1   |                                                                                                                                                                                          | 108.1 | 101.4 | 103.1 | 92.7  | 92.6  | 99.9  | 100.8 | 105.1 |
| 84875528  | Mrpl1             | 336  | 37.6  | Ribosome                                                                                                                                                                                 | 107.6 | 89.2  | 117   | 90.4  | 104.6 | 103.9 | 107.8 | 113.7 |
| 31981027  | Adrm1             | 407  | 42    |                                                                                                                                                                                          | 172.1 | 263   | 118.3 | 89.1  | 86.1  | 72.9  | 86    | 72.8  |
| 168693635 | Naga              | 415  | 47.2  | Glycosphingolipid biosynthesis - globo and isoglobo series; Lysosome                                                                                                                     | 157.9 | 150.3 | 135.8 | 131.2 | 74.8  | 75.7  | 71.4  | 72.4  |
| 257196240 | Smpd4             | 823  | 93.2  | Metabolic pathways; Sphingolipid metabolism                                                                                                                                              | 92.1  |       | 85.2  |       | 114.2 |       | 107.6 |       |
| 10946986  | Arpp19            | 112  | 12.3  |                                                                                                                                                                                          | 120.6 | 106.1 | 104.7 | 107.4 | 101.5 | 88.9  | 109.5 | 103   |
| 30409988  | Gale              | 347  | 38.2  | Metabolic pathways; Amino sugar and nucleotide sugar metabolism; Galactose metabolism                                                                                                    | 104.4 | 104.6 | 98.3  | 95.1  | 97.1  | 98.6  | 96.1  | 94.7  |
| 13386092  | Denr              | 198  | 22.2  |                                                                                                                                                                                          | 104.3 | 107.4 | 101.2 | 106.6 | 87.4  | 87.4  | 109.4 | 104   |
| 87299619  | Leo1              | 667  | 75.6  |                                                                                                                                                                                          | 102.5 | 100   | 97.5  | 96.7  | 101.9 | 101.7 | 107.5 | 100.5 |
| 157951736 | Casp6             | 276  | 31.6  | Apoptosis                                                                                                                                                                                | 105.4 | 110.8 | 98.7  | 105.9 | 90    | 95.3  | 77.8  | 77.7  |
| 22296603  | CommD3            | 195  | 22    |                                                                                                                                                                                          | 105   | 99.7  | 90.6  | 88.6  | 104.1 | 100.3 | 104.9 | 93.5  |
| 6671559   | Ap1s1             | 158  | 18.7  | Lysosome                                                                                                                                                                                 | 101.5 | 111.2 | 100.4 | 91.5  | 99.2  | 110   | 94.8  | 112.6 |
| 255958238 | Mlh1              | 760  | 84.6  | Platinum drug resistance; Endometrial cancer; Pathways in cancer; Fanconi anemia pathway; Colorectal cancer; Mismatch repair                                                             | 102.8 | 99.9  | 96.6  | 85.2  | 105.2 | 105.6 | 100.9 | 109.4 |
| 110625866 | Mtif2             | 727  | 81.2  |                                                                                                                                                                                          | 109.6 | 111.4 | 108.3 | 105.5 | 99.5  | 98.6  | 101   | 103.3 |
| 189491655 | Cyld              | 955  | 106.8 |                                                                                                                                                                                          | 110.5 | 103.2 | 106.2 | 111.2 | 85.3  | 82.3  | 91.4  | 92.4  |
| 37718989  | Gmeb2             | 530  | 56.6  |                                                                                                                                                                                          | 97.8  | 98.1  | 103.3 | 98.9  | 105.9 | 109.6 | 97.5  | 103.9 |
| 31980873  | Vps53             | 832  | 94.4  |                                                                                                                                                                                          | 104.1 | 95.1  | 95.3  | 89.8  | 103.7 | 118   | 102.3 | 102.5 |
| 119226255 | Sp1               | 781  | 80.4  | Breast cancer; Huntington's disease; Transcriptional misregulation in cancer; TGF-beta signaling pathway; Choline metabolism in cancer; Estrogen signaling pathway; Endocrine resistance | 84.9  | 100.7 | 102.4 | 95.4  | 103.8 | 100.2 | 109.4 | 115.5 |
| 242332593 | Lamtor1           | 161  | 17.7  | mTOR signaling pathway                                                                                                                                                                   | 104   | 104.4 | 99.4  | 99.6  | 106.6 | 103.6 | 102.7 | 92    |
| 254553337 | Rpl30; Rpl30-ns8; | 115  | 12.8  | Ribosome                                                                                                                                                                                 | 87.7  | 89.1  | 93.2  | 90.5  | 107   | 107.8 | 113.8 | 114   |
| 268838784 | Gtf2e2            | 292  | 33    | Basal transcription factors; Epstein-Barr virus infection; Viral carcinogenesis                                                                                                          | 96.9  | 102.9 | 83.2  | 84.7  | 105.8 | 106.2 | 128.2 | 128   |
| 21489969  | Usp15             | 981  | 112.3 |                                                                                                                                                                                          | 90.2  | 92.7  | 88.5  | 92    | 105   | 114.4 | 115.8 | 113.6 |
| 31560168  | Atad1             | 361  | 40.7  |                                                                                                                                                                                          | 86.5  | 86.3  | 92.6  | 84.6  | 118.5 | 118.5 | 109.8 | 116   |
| 254588079 | Naa40             | 237  | 27.2  |                                                                                                                                                                                          | 77.5  | 71.8  | 91.9  | 85.3  | 146.2 | 148.2 | 112.8 | 120.2 |
| 110626003 | CommD2            | 199  | 22.8  |                                                                                                                                                                                          | 102.5 | 92.2  | 101.3 | 93.8  | 99.9  | 104   | 96.4  | 101.5 |
| 23097256  | Pop1              | 1045 | 117.3 |                                                                                                                                                                                          | 107.8 | 100.7 | 93.1  | 98.5  | 106.1 | 103   | 101.5 | 103.1 |
| 166295183 | Qrich1            | 777  | 86.5  |                                                                                                                                                                                          | 109.9 | 106.7 | 101.5 | 94.8  | 107.2 | 103   | 99.6  | 105.6 |

|           |                   |      |       |                                                                                                                                                                                                                                                           |       |       |       |       |       |       |       |       |
|-----------|-------------------|------|-------|-----------------------------------------------------------------------------------------------------------------------------------------------------------------------------------------------------------------------------------------------------------|-------|-------|-------|-------|-------|-------|-------|-------|
| 76563952  | Rexo4             | 432  | 47.6  |                                                                                                                                                                                                                                                           | 100.2 | 95.4  | 111   | 98.4  | 106.8 | 105.3 | 98    | 102.4 |
| 22122373  | Sde2              | 448  | 48.6  |                                                                                                                                                                                                                                                           | 102.2 | 105.4 | 105.1 | 99.3  | 93.5  | 92    | 98.7  | 106.8 |
| 47078287  | Psmf1             | 271  | 29.6  | Proteasome                                                                                                                                                                                                                                                | 97.1  | 97.2  | 108.2 | 104.5 | 103.6 | 107.3 | 103.5 | 104.7 |
| 227116358 | Mecr              | 373  | 40.3  | Fatty acid metabolism; Metabolic pathways; Fatty acid elongation                                                                                                                                                                                          | 95.9  | 100.1 | 94.6  | 93.8  | 106.7 | 105.7 | 108   | 114.9 |
| 29789253  | Mrpl9             | 265  | 30.2  | Ribosome                                                                                                                                                                                                                                                  | 84.2  | 90.1  | 88.1  | 89.6  | 115.9 | 118.5 | 113   | 111.8 |
| 118344448 | Cblb              | 938  | 104.5 | ErbB signaling pathway; Endocytosis; T cell receptor signaling pathway; Ubiquitin mediated proteolysis; Insulin signaling pathway; Proteoglycans in cancer; Pathways in cancer; Chronic myeloid leukemia; Measles; Bacterial invasion of epithelial cells | 85.3  | 89.7  | 82.2  | 81.1  | 125.8 | 128.3 | 131.8 | 127.2 |
| 27502349  | Pmpca             | 524  | 58.2  |                                                                                                                                                                                                                                                           | 115.9 | 107.5 | 121.2 | 114.2 | 85.5  | 95.1  | 85.7  | 91.4  |
| 13386010  | Rpl22l1           | 122  | 14.5  | Ribosome                                                                                                                                                                                                                                                  | 86.3  | 87.9  | 92.7  | 98.3  | 115.6 | 131.5 | 112.1 | 99.5  |
| 255069756 | Myo1f             | 1098 | 125.1 |                                                                                                                                                                                                                                                           | 148.3 | 125.2 | 113.5 | 115   | 86.3  | 87.5  | 68.4  | 78.8  |
| 262231766 | Smek2;<br>Ppp4r3b | 820  | 93.9  | Glucagon signaling pathway                                                                                                                                                                                                                                | 104.9 | 110.4 | 92.7  | 88.4  | 105.3 | 108.9 | 116.1 | 115.9 |
| 24211031  | Snx17             | 470  | 52.8  |                                                                                                                                                                                                                                                           | 118   | 113.7 | 87.1  | 96.9  | 89.1  | 96    | 142.2 | 83.2  |
| 27734094  | Rpusd2            | 553  | 61.5  |                                                                                                                                                                                                                                                           | 113.8 | 106.3 | 102.3 | 97.4  | 89.8  | 96.1  | 107.4 | 108   |
| 244792650 | Tnik              | 1363 | 155.2 |                                                                                                                                                                                                                                                           | 100.2 | 100.5 | 99    | 98.8  | 103.3 | 102.7 | 97.7  | 96.5  |
| 31981600  | Ndufa2            | 99   | 10.9  | Metabolic pathways; Huntington's disease; Non-alcoholic fatty liver disease (NAFLD); Oxidative phosphorylation; Parkinson's disease; Alzheimer's disease                                                                                                  | 105.6 | 111.5 | 102   | 106   | 93.6  | 90.1  | 85.6  | 67.1  |
| 121583673 | Cactin            | 772  | 90.6  |                                                                                                                                                                                                                                                           | 99.2  | 109   | 98.8  | 94.3  | 95.9  | 95.6  | 103.5 | 106.6 |
| 254281348 | Chi3l3;<br>Chi3   | 398  | 44.4  |                                                                                                                                                                                                                                                           | 221.3 | 236.4 | 211.8 | 226.9 | 53.3  | 47.8  | 50.8  | 41.1  |
| 31542366  | Cdk1              | 297  | 34.1  | Herpes simplex infection; p53 signaling pathway; Progesterone-mediated oocyte maturation; Epstein-Barr virus infection; Oocyte meiosis; Cell cycle; Gap junction; Viral carcinogenesis                                                                    | 58.5  | 62.1  | 61    | 66.1  | 161.3 | 151.8 | 153   | 148.8 |
| 124487344 | Esf1              | 845  | 98    |                                                                                                                                                                                                                                                           | 107.8 | 101.2 | 91.1  | 90.9  | 116.3 | 109.9 | 108.7 | 118.3 |
| 34328232  | Atf7ip            | 1306 | 138.5 |                                                                                                                                                                                                                                                           | 107.3 | 97.5  | 107.1 | 94.6  | 88.2  | 83.7  | 99.9  | 114   |
| 9789975   | Stam2             | 523  | 57.4  | Endocytosis; Jak-STAT signaling pathway                                                                                                                                                                                                                   | 101   | 106.6 | 88.1  | 90    | 100.2 | 105   | 112.7 | 106.8 |
| 225543495 | Ythdf3            | 596  | 65.4  |                                                                                                                                                                                                                                                           | 110.7 | 106.9 | 104.7 | 100   | 95.5  | 99.9  | 103.5 | 99.1  |
| 126517465 | Tbc1d10c          | 444  | 49.9  |                                                                                                                                                                                                                                                           | 97.4  | 109.6 | 109.1 | 110.7 | 90.1  | 87    | 82.6  | 89.5  |
| 31982664  | Itpa              | 198  | 21.9  | Metabolic pathways; Purine metabolism; Drug metabolism - other enzymes                                                                                                                                                                                    | 107.1 | 105.3 | 94.5  | 97.4  | 91.7  | 97.4  | 107.1 | 104.8 |
| 30352010  | Iws1              | 766  | 85.2  |                                                                                                                                                                                                                                                           | 101.2 | 114.8 | 103.2 | 100.8 | 90.3  | 106.7 | 97.8  | 93.6  |
| 29244484  | Vps37b            | 285  | 31    | Endocytosis                                                                                                                                                                                                                                               | 128.9 | 148.8 | 101.6 | 96.2  | 89.9  | 92.6  | 89.5  | 88.5  |
| 14030773  | Cep41;<br>Tsga14  | 373  | 41.4  |                                                                                                                                                                                                                                                           | 108.5 | 107.3 | 111.3 | 102.3 | 104.6 | 92.2  | 101.7 | 102   |
| 270047485 | 9030624J<br>02Rik | 991  | 111.9 |                                                                                                                                                                                                                                                           | 111.6 | 97.1  | 105.3 | 96.5  | 97.9  | 104.8 | 84.3  | 103.3 |
| 84579825  | Exoc3             | 755  | 86.4  | Tight junction                                                                                                                                                                                                                                            | 108.1 | 97    | 111.5 | 103.9 | 96.6  | 96.9  | 95.9  | 106.4 |

|           |                            |      |       |                                                                                                                                           |       |       |       |       |       |       |       |       |
|-----------|----------------------------|------|-------|-------------------------------------------------------------------------------------------------------------------------------------------|-------|-------|-------|-------|-------|-------|-------|-------|
| 124486963 | Polr3a                     | 1390 | 155.6 | RNA polymerase; Epstein-Barr virus infection; Metabolic pathways; Purine metabolism; Pyrimidine metabolism; Cytosolic DNA-sensing pathway | 98.8  | 103   | 100.1 | 110.2 | 103.8 | 103.1 | 103.2 | 94.6  |
| 131412178 | Klc1                       | 616  | 69.5  |                                                                                                                                           | 105.6 | 103   | 106.8 | 101.3 | 104.1 | 96.2  | 94.3  | 98.7  |
| 269973917 | Gphn                       | 772  | 83.6  |                                                                                                                                           | 89.4  | 91.8  | 80.3  | 87.1  | 116.1 | 108.8 | 123.8 | 128.4 |
| 261878545 | Med23                      | 1376 | 157   |                                                                                                                                           | 108.8 | 109.3 | 94    | 96    | 102.4 | 93.6  | 103.2 | 100.4 |
| 268370088 | Setd3                      | 594  | 67.1  | Lysine degradation                                                                                                                        | 74.8  | 84.6  | 88.6  | 80.5  | 117.3 | 120.9 | 125.2 | 129.7 |
| 21426847  | Pea15a                     | 130  | 15    |                                                                                                                                           | 128.1 | 126   | 122.3 | 120.3 | 68.3  | 67.1  | 82.1  | 84.3  |
| 158937308 | Vps33b                     | 617  | 70.5  |                                                                                                                                           | 108.1 | 101   | 99.2  | 106   | 91.7  | 98.4  | 106.7 | 97.4  |
| 6679409   | Pola1                      | 1465 | 167.2 | DNA replication; Metabolic pathways; Purine metabolism; Pyrimidine metabolism                                                             | 78.8  | 87.2  | 74.4  | 74.4  | 134.7 | 123.2 | 120.3 | 122.3 |
| 226823202 | Itgae                      | 1167 | 128.8 | Regulation of actin cytoskeleton                                                                                                          | 106.8 | 100.7 | 111.5 | 106.2 | 97.8  | 102.4 | 76.1  | 98.5  |
| 171184428 | Faim                       | 179  | 20.2  |                                                                                                                                           | 114.1 | 106.6 | 102.3 | 101.2 | 91.4  | 100.8 | 100.1 | 103.1 |
| 226958616 | Dhrs7                      | 338  | 38.1  |                                                                                                                                           | 104.6 | 113.5 | 91.8  | 102   | 97.9  | 96.5  | 105.6 | 95.9  |
| 225543251 | Hccs                       | 272  | 31    | Porphyrin and chlorophyll metabolism                                                                                                      | 86.9  | 80.6  | 90    | 86.8  | 117   | 128.1 | 117.3 | 89.8  |
| 124430535 | Mrpl38                     | 380  | 45    |                                                                                                                                           | 93.5  | 97    | 99.2  | 100.1 | 112.7 | 112.4 | 113.2 | 109.6 |
| 31559990  | Tor1b                      | 336  | 37.8  |                                                                                                                                           | 89.8  | 92.3  | 91.7  | 85.8  | 106.6 | 107.3 | 106.3 | 111   |
| 9790225   | 15000030<br>03Rik;<br>Chp1 | 195  | 22.4  |                                                                                                                                           | 90.3  | 96.5  | 84.5  | 93    | 107.4 | 99.9  | 114.7 | 108.8 |
| 122937372 | Srsf10                     | 262  | 31.3  | Spliceosome                                                                                                                               | 98.8  | 98.6  | 91.8  | 95.6  | 82.7  | 93.8  | 146   | 102.2 |
| 357527386 | Usp34                      | 3582 | 408   |                                                                                                                                           | 91.4  | 94.2  | 84.8  | 95.3  | 106.3 | 110.7 | 112.1 | 96.6  |
| 257196267 | Spice1                     | 860  | 95.6  |                                                                                                                                           | 110.7 |       | 104.1 |       | 99.4  |       | 99.8  |       |
| 15022805  | Hmg20a                     | 346  | 39.9  |                                                                                                                                           | 110.8 | 105.3 | 98.1  | 98.4  | 98.7  | 97.9  | 93    | 96.7  |
| 21703744  | Eif2b1                     | 305  | 33.8  | RNA transport                                                                                                                             | 97.8  | 95.6  | 101.4 | 109.7 | 107.8 | 97.4  | 108.1 | 96    |
| 71043975  | Ccdc50                     | 305  | 35.3  |                                                                                                                                           | 73.8  | 76.1  | 73.1  | 75.3  | 119.9 | 116.9 | 154.1 | 142.1 |
| 124249204 | Rfc3                       | 356  | 40.5  | DNA replication, nucleotide excision repair, mismatch repair                                                                              | 90    | 85.7  | 88.2  | 81.6  | 113.7 | 118.4 | 114.4 | 116.9 |
| 21536222  | Rps21                      | 83   | 9.1   | Ribosome                                                                                                                                  | 94    | 93.9  | 110.2 | 109.3 | 112.8 | 122.2 | 69.5  | 59.4  |
| 39841057  | Cep135                     | 1140 | 133.3 |                                                                                                                                           | 118.6 | 119.3 | 104.8 | 109.7 | 94.8  | 87.5  | 98.6  | 103.6 |
| 170650599 | Gfm1                       | 751  | 83.5  |                                                                                                                                           | 91.5  | 87.3  | 97.9  | 89.1  | 120.9 | 124.6 | 112.5 | 120.6 |
| 21312175  | Mets1                      | 181  | 20.5  |                                                                                                                                           | 105.2 | 108.2 | 106   | 109.1 | 93.9  | 89.6  | 101.7 | 103.2 |
| 244790233 | Eml2                       | 668  | 72.7  |                                                                                                                                           | 109.3 | 111.2 | 97.9  | 96    | 92.8  | 90.1  | 100.1 | 103.6 |
| 20149310  | Mob2                       | 235  | 26.8  |                                                                                                                                           | 99    | 99.4  | 102.6 | 99.9  | 95.7  | 95.1  | 86.1  | 79    |
| 21313424  | Drap1                      | 205  | 22.3  |                                                                                                                                           | 112.6 | 114.7 | 106.9 | 109.9 | 88.6  | 88.7  | 95    | 91.7  |
| 253314458 | Phax                       | 385  | 43.2  | RNA transport                                                                                                                             | 107.1 | 99.9  | 103.4 | 102.6 | 109.2 | 114.1 | 82.3  | 81.9  |
| 13385586  | Nanp                       | 248  | 27.8  | Metabolic pathways; Amino sugar and nucleotide sugar metabolism                                                                           | 104.4 | 103.4 | 102.9 | 99.3  | 94.9  | 96.3  | 100.9 | 99.1  |
| 125988403 | Spes3                      | 180  | 20.3  | Protein export                                                                                                                            | 97.1  | 98    | 114.3 | 108   | 106.4 | 101.5 | 86.8  | 91.6  |
| 65301464  | Asap1                      | 1147 | 127.3 | Endocytosis; Fc gamma R-mediated phagocytosis                                                                                             | 109.9 | 106.9 | 103.3 | 99.6  | 99.6  | 97.1  | 95.7  | 100.8 |
| 21312614  | Cpsf31;<br>Ints11          | 600  | 67.8  |                                                                                                                                           | 90.6  | 98.6  | 94.4  | 91.9  | 116.6 | 117.5 | 110.4 | 113.3 |

|           |                              |      |       |                                                                                                                                                                                       |       |       |       |       |       |       |       |       |
|-----------|------------------------------|------|-------|---------------------------------------------------------------------------------------------------------------------------------------------------------------------------------------|-------|-------|-------|-------|-------|-------|-------|-------|
| 11096338  | Ms4a4b                       | 226  | 24.1  |                                                                                                                                                                                       | 112.4 | 122.9 | 90.2  | 87.1  | 97.9  | 92.9  | 98.2  | 94.6  |
| 27229115  | Ints10                       | 710  | 82    |                                                                                                                                                                                       | 105.2 | 107.5 | 94.6  | 91.4  | 104.1 | 100.7 | 102   | 108.3 |
| 227499103 | Rnpep                        | 650  | 72.4  |                                                                                                                                                                                       | 101.1 | 97.1  | 103.8 | 106.6 | 98.2  | 97.4  | 95.2  | 97.3  |
| 255760017 | Timeless                     | 1197 | 137.4 |                                                                                                                                                                                       | 59.3  | 89.8  | 57.6  | 74.2  | 139   | 122.9 | 153.7 | 134.3 |
| 161621271 | Uhrfl                        | 782  | 88.2  |                                                                                                                                                                                       | 81.1  | 86.9  | 84.5  | 79.3  | 133.2 | 136.1 | 126.6 | 113.3 |
| 31560336  | Sap30bp                      | 308  | 33.8  |                                                                                                                                                                                       | 99.5  | 100.9 | 104.2 | 104.7 | 91    | 94.3  | 108.8 | 106.2 |
| 215490077 | Sap18;<br>Gm10094;<br>Sap18b | 172  | 19.6  | mRNA surveillance pathway; RNA transport                                                                                                                                              | 100.4 | 101.4 | 100   | 99.8  | 97.1  | 94    | 111.9 | 107.1 |
| 46559412  | Paccin1                      | 441  | 50.5  |                                                                                                                                                                                       | 100.4 | 102.6 | 101.9 | 100   | 90.3  | 93.6  | 106   | 107.1 |
| 238231439 | Rabep1                       | 862  | 99.5  | Endocytosis                                                                                                                                                                           | 104.7 | 106   | 95.4  | 101   | 104   | 106.7 | 106.1 | 104.8 |
| 12963557  | Dmap1                        | 468  | 53.1  |                                                                                                                                                                                       | 108   | 104   | 98.7  | 101.6 | 85.1  | 93.9  | 90.4  | 95.7  |
| 68299763  | Msh3                         | 1095 | 123.3 | Platinum drug resistance; Pathways in cancer; Colorectal cancer; Mismatch repair                                                                                                      | 101.8 | 98.4  | 104.7 | 107.6 | 100.6 | 97.8  | 89.1  | 93.2  |
| 21312988  | Mzt2                         | 159  | 16.5  |                                                                                                                                                                                       | 103.1 | 107.2 | 106.1 | 99    | 100   | 109.5 | 104   | 107.4 |
| 162135971 | Ccdc6                        | 469  | 52.9  | Pathways in cancer; Thyroid cancer                                                                                                                                                    | 96.6  | 93.7  | 92.1  | 86.2  | 108.2 | 107.2 | 115.6 | 119.9 |
| 27753952  | Rbm7                         | 265  | 30.1  |                                                                                                                                                                                       | 97.4  | 101.7 | 104.3 | 101.2 | 87.4  | 92.3  | 96.1  | 102.2 |
| 16930823  | Prosc;<br>Plpbp              | 274  | 30    |                                                                                                                                                                                       | 121   | 115.1 | 113.6 | 109.3 | 87.9  | 80.3  | 94    | 96.2  |
| 70780373  | Akap81                       | 641  | 71.3  | Epstein-Barr virus infection                                                                                                                                                          | 113.5 | 112.5 | 103.1 | 113.4 | 90    | 91.7  | 99.5  | 77.4  |
| 160333168 | Fiz1                         | 500  | 52.7  |                                                                                                                                                                                       | 132.7 |       | 113.2 |       | 98.8  |       | 54.4  |       |
| 6678303   | Tfam                         | 243  | 28    | Huntington's disease                                                                                                                                                                  | 110.3 | 112   | 106.3 | 102.4 | 87.4  | 92.6  | 107.2 | 104.7 |
| 148747177 | Rab22a                       | 194  | 21.8  | Endocytosis                                                                                                                                                                           | 103.7 | 92.4  | 95.7  | 90    | 96.4  | 101.5 | 97.9  | 103.6 |
| 6753190   | Glb1                         | 647  | 73.1  | Metabolic pathways; Lysosome; Sphingolipid metabolism; Glycosphingolipid biosynthesis - ganglio series; Glycosaminoglycan degradation; Other glycan degradation; Galactose metabolism | 132.2 | 122.3 | 109.5 | 112.6 | 101.3 | 102.4 | 80.7  | 83.9  |
| 122937361 | Gnl1                         | 607  | 68.7  |                                                                                                                                                                                       | 92.6  | 106.5 | 91.8  | 99.6  | 116.4 | 106.7 | 104.9 | 104.5 |
| 58037097  | Rnaseh2b                     | 308  | 34.7  | DNA replication                                                                                                                                                                       | 102.6 | 91.8  | 90    | 87.3  | 100.9 | 106.9 | 111.6 | 101.2 |
| 148747179 | Ly75                         | 1723 | 197.2 |                                                                                                                                                                                       | 105.2 | 101.8 | 128.5 | 128.4 | 96.2  | 104.2 | 73.6  | 59.3  |
| 160948577 | Hs1bp3                       | 395  | 43.7  |                                                                                                                                                                                       | 119.2 | 115.7 | 110.2 | 105.2 | 97.8  | 99.2  | 82.9  | 94.8  |
| 133922575 | Nudcd2                       | 157  | 17.6  |                                                                                                                                                                                       | 87.5  | 107.8 | 96.6  | 102.3 | 122.4 | 112.8 | 54.5  | 71.5  |
| 407228369 | Cd82                         | 266  | 29.6  | p53 signaling pathway                                                                                                                                                                 | 80    | 79.6  | 78.5  | 75.9  | 118.7 | 119.3 | 110.4 | 113.9 |
| 29568084  | Snx9                         | 595  | 66.5  |                                                                                                                                                                                       | 74.8  | 78.4  | 68.2  | 65.4  | 133   | 134   | 144.5 | 138.8 |
| 254939694 | U2af1                        | 239  | 27.8  | Spliceosome                                                                                                                                                                           | 101.9 | 102.2 | 96.7  | 97.9  | 102.9 | 89.2  | 98.4  | 115.3 |
| 145864461 | Lemd3                        | 918  | 100.1 |                                                                                                                                                                                       | 102.7 | 101   | 100.6 | 100.2 | 102.7 | 94    | 112.9 | 117.2 |
| 33859813  | Rftn1                        | 554  | 61.5  |                                                                                                                                                                                       | 107.9 | 112.5 | 98.3  | 96.2  | 98.6  | 96    | 104   | 105.9 |
| 21313400  | Mrpl55                       | 127  | 15.1  |                                                                                                                                                                                       | 106.7 | 103.3 | 96.4  | 90.2  | 118.6 | 106.6 | 107.8 | 104   |
| 19527372  | Psmg2                        | 264  | 29.5  |                                                                                                                                                                                       | 90    | 87.7  | 85.7  | 79.2  | 110.1 | 113.8 | 115.2 | 115.4 |
| 33468937  | Timm17b                      | 172  | 18.3  |                                                                                                                                                                                       | 92.5  | 89.8  | 97.9  | 95.7  | 111   | 107.5 | 89.6  | 106.5 |

|           |                    |      |       |                                                                                                                                                                                                                                                                             |       |       |       |       |       |       |       |       |
|-----------|--------------------|------|-------|-----------------------------------------------------------------------------------------------------------------------------------------------------------------------------------------------------------------------------------------------------------------------------|-------|-------|-------|-------|-------|-------|-------|-------|
| 84579891  | Runx3              | 423  | 45.1  | Th1 and Th2 cell differentiation                                                                                                                                                                                                                                            | 111.9 | 115.3 | 102.6 | 107.2 | 92.5  | 85.6  | 81.6  | 89.6  |
| 146134371 | 311008211<br>7Rik  | 195  | 22.2  |                                                                                                                                                                                                                                                                             | 100   | 101.4 | 99    | 102.6 | 108.9 | 112.5 | 118.9 | 114   |
| 31324571  | Cnot10             | 744  | 81.8  | RNA degradation                                                                                                                                                                                                                                                             | 98.5  | 105   | 99.2  | 92.1  | 101.8 | 108.4 | 103.9 | 99.1  |
| 160333775 | Ldlrap1            | 308  | 34    | Endocytosis                                                                                                                                                                                                                                                                 | 107.2 | 110.8 | 105.8 | 102.8 | 96    | 90.6  | 96.5  | 88.8  |
| 21703854  | Dhrs7b             | 323  | 35    |                                                                                                                                                                                                                                                                             | 103.1 | 104.4 | 93.2  | 93    | 113.1 | 111.9 | 108.4 | 110   |
| 6753912   | Fth1               | 182  | 21.1  | Mineral absorption                                                                                                                                                                                                                                                          | 107.4 | 110.4 | 111.1 | 127.6 | 94.5  | 89.9  | 102.3 | 98.1  |
| 18497290  | Raf1               | 648  | 72.9  | Oxytocin signaling pathway; ErbB signaling pathway;<br>FoxO signaling pathway; Acute myeloid leukemia; mTOR<br>signaling pathway; T cell receptor signaling pathway;<br>Phospholipase D signaling pathway; Regulation of actin<br>cytoskeleton; MAPK signaling pathway; Mic | 106   |       | 105.9 |       | 113.3 |       | 69.7  |       |
| 116268089 | Ccdc134            | 229  | 26.5  |                                                                                                                                                                                                                                                                             | 94.2  | 96.7  | 87.4  | 86.1  | 113.6 | 116.9 | 100.9 | 89    |
| 227499242 | Uba5               | 403  | 44.8  |                                                                                                                                                                                                                                                                             | 114.4 | 118.3 | 109.5 | 107.6 | 96.7  | 92.4  | 99.3  | 95.1  |
| 33468857  | Hint1              | 126  | 13.8  |                                                                                                                                                                                                                                                                             | 105.3 | 105.8 | 103.9 | 104.5 | 99.1  | 98.8  | 99.7  | 100.1 |
| 21313170  | Trmt5              | 501  | 56.8  |                                                                                                                                                                                                                                                                             | 92.8  | 95.8  | 82.3  | 70.7  | 94.9  | 88.6  | 93.3  | 88.9  |
| 27881435  | Sap130             | 1056 | 111.1 |                                                                                                                                                                                                                                                                             | 106.7 | 100.2 | 107.6 | 101.2 | 96.8  | 97.1  | 90.8  | 91.4  |
| 166706913 | Ppip5k2            | 1123 | 127.6 |                                                                                                                                                                                                                                                                             | 104.9 | 102.5 | 92.3  | 96.2  | 102.8 | 101.8 | 104.9 | 107.1 |
| 13385532  | Pfdn1              | 122  | 14.2  |                                                                                                                                                                                                                                                                             | 97.3  | 98.5  | 96.6  | 98.7  | 102.1 | 106.9 | 109   | 110.5 |
| 228008415 | Sars2              | 518  | 58.3  | Aminoacyl-tRNA biosynthesis                                                                                                                                                                                                                                                 | 108.4 | 116.6 | 93.7  | 96.7  | 111.1 | 121.9 | 94.7  | 92    |
| 460838688 | Chd7               | 2986 | 333.9 |                                                                                                                                                                                                                                                                             | 98.6  |       | 98.5  |       | 96.1  |       | 104.2 |       |
| 170172553 | Ncf1               | 390  | 44.6  | Leukocyte transendothelial migration; Chemokine signaling<br>pathway; Osteoclast differentiation; Phagosome; Fc gamma<br>R-mediated phagocytosis; Leishmaniasis                                                                                                             | 102.4 | 107.9 | 93.5  | 89.5  | 103.4 | 109.7 | 89    | 91.7  |
| 160333726 | Cdk7               | 346  | 38.9  | Basal transcription factors; Nucleotide excision repair; Cell<br>cycle                                                                                                                                                                                                      | 85.5  | 90.1  | 98.5  | 96.8  | 109.9 | 108.8 | 93.6  | 95    |
| 7305129   | H2-M3              | 336  | 37.8  | Endocytosis; Herpes simplex infection; Allograft rejection;<br>Epstein-Barr virus infection; Cell adhesion molecules<br>(CAMs); HTLV-I infection; Phagosome; Graft-versus-host<br>disease; Viral myocarditis; Antigen processing and<br>presentation; Type I diabetes melli | 103.8 | 109.4 | 92.1  | 92    | 97.4  | 102.8 | 95.6  | 95.6  |
| 9790159   | Pitpnb             | 271  | 31.5  |                                                                                                                                                                                                                                                                             | 86.7  | 78.8  | 78.5  | 72.7  | 121.5 | 143.8 | 121.2 | 111   |
| 38348464  | Rsl24d1;<br>Gm6457 | 163  | 19.6  | Ribosome                                                                                                                                                                                                                                                                    | 81.1  | 77.5  | 81.3  | 78.7  | 125.2 | 123.2 | 137.2 | 142.3 |
| 255003835 | Cep192             | 2514 | 276.2 |                                                                                                                                                                                                                                                                             | 103.3 | 95    | 103.1 | 105.4 | 99.6  | 95.1  | 97.4  | 103.1 |
| 161169027 | Runx1              | 465  | 50.2  | Acute myeloid leukemia; Transcriptional misregulation in<br>cancer; Pathways in cancer; Chronic myeloid leukemia                                                                                                                                                            | 99.5  | 125.7 | 95.7  | 111.8 | 97.7  | 77.3  | 100.7 | 86.1  |
| 22122481  | Ccm2               | 453  | 49.9  |                                                                                                                                                                                                                                                                             | 125.9 | 121.8 | 113.4 | 106.6 | 97.6  | 93    | 84.1  | 103.5 |
| 88758582  | Pdxdc1             | 787  | 87.3  |                                                                                                                                                                                                                                                                             | 94.3  | 93.9  | 91.2  | 86.8  | 112.3 | 114.7 | 109.5 | 115.1 |
| 21536262  | Mettl13            | 698  | 78.7  |                                                                                                                                                                                                                                                                             | 94.3  | 96.6  | 87.4  | 89.4  | 109.3 | 116.9 | 116.7 | 108.1 |
| 9507153   | Stk19              | 254  | 28.1  |                                                                                                                                                                                                                                                                             | 101.6 | 105.5 | 107.1 | 106.5 | 95.8  | 97.7  | 97.2  | 98.9  |
| 21311915  | Cyp2s1             | 501  | 55.6  | Retinol metabolism; Metabolic pathways; Metabolism of<br>xenobiotics by cytochrome P450                                                                                                                                                                                     | 131.6 | 128.5 | 73.3  | 87.2  | 80.9  | 97.4  | 89.7  | 83.1  |



|           |             |      |       |                                                                                                                                                                                                                                                                 |       |       |       |       |       |       |       |       |
|-----------|-------------|------|-------|-----------------------------------------------------------------------------------------------------------------------------------------------------------------------------------------------------------------------------------------------------------------|-------|-------|-------|-------|-------|-------|-------|-------|
| 257196209 | Rpp30       | 268  | 29.5  | Ribosome biogenesis in eukaryotes; RNA transport                                                                                                                                                                                                                | 101.4 | 108.8 | 98.7  | 113.1 | 102.7 | 105   | 96.6  | 95    |
| 94536844  | Rpia        | 303  | 32.4  | Metabolic pathways; Biosynthesis of amino acids; Pentose phosphate pathway; Carbon metabolism                                                                                                                                                                   | 95.8  | 95.6  | 86.9  | 106   | 122.3 | 112.5 | 113.4 | 101.6 |
| 6753136   | Atox1       | 68   | 7.3   | Mineral absorption                                                                                                                                                                                                                                              | 92.7  | 81.7  | 162.6 | 174.1 | 85    | 89.4  | 74.1  | 71    |
| 308081845 | Fgfr1op     | 399  | 42.7  |                                                                                                                                                                                                                                                                 | 105   | 111.5 | 103.4 | 103.1 | 114.2 | 119   | 101.2 | 83.4  |
| 13385298  | Lonp2       | 852  | 94.5  |                                                                                                                                                                                                                                                                 | 80.9  | 81.9  | 69.9  | 79.4  | 136.5 | 122.7 | 125.6 | 134.7 |
| 284005509 | Pwp1        | 501  | 55.6  |                                                                                                                                                                                                                                                                 | 88.6  | 80.9  | 91.1  | 87.2  | 119.3 | 121.8 | 110.4 | 117.8 |
| 148235701 | Mrps35      | 320  | 35.9  |                                                                                                                                                                                                                                                                 | 92    | 97.7  | 87.2  | 87.5  | 116.2 | 122.5 | 103   | 103.5 |
| 89337262  | Flad1       | 492  | 54.7  | Metabolic pathways; Riboflavin metabolism                                                                                                                                                                                                                       | 99    | 130.7 | 92.3  | 86.2  | 115   | 86.8  | 110.9 | 100.2 |
| 31981130  | Klf13       | 289  | 31.1  |                                                                                                                                                                                                                                                                 | 95.4  | 100.5 | 104.4 | 86.8  | 97.8  | 99.7  | 98.3  | 106.2 |
| 21313396  | Mmab        | 237  | 26.3  | Metabolic pathways; Porphyrin and chlorophyll metabolism                                                                                                                                                                                                        | 113.4 | 111.9 | 100.9 | 102.8 | 104.2 | 110.9 | 95.7  | 93.3  |
| 6678924   | Mpp1        | 466  | 52.2  |                                                                                                                                                                                                                                                                 | 107.2 | 89.4  | 99.5  | 104.3 | 102.9 | 100.3 | 98.8  | 96.7  |
| 226693388 | Hgs         | 776  | 86.1  | Endocytosis; Phagosome                                                                                                                                                                                                                                          | 107.1 | 115.8 | 101.4 | 94.1  | 100.6 | 95    | 97.3  | 82.9  |
| 116089341 | Abi1        | 481  | 52.3  |                                                                                                                                                                                                                                                                 | 103.7 | 94.3  | 93.3  | 93.3  | 95.7  | 101.1 | 109.1 | 110.6 |
| 258645088 | Zbtb11      | 1050 | 118.5 |                                                                                                                                                                                                                                                                 | 96.8  | 104.5 | 101.9 | 94.5  | 98.1  | 88.9  | 105.5 | 108.1 |
| 67972435  | Ddx49       | 480  | 54.1  |                                                                                                                                                                                                                                                                 | 97    | 119.4 | 94.2  | 96    | 112.3 | 109.8 | 119.2 | 110.2 |
| 19424352  | Mrpl16      | 251  | 28.8  | Ribosome                                                                                                                                                                                                                                                        | 90.4  | 93.9  | 87.7  | 91.8  | 111.6 | 108.6 | 101.8 | 110.1 |
| 39930477  | Sept8       | 430  | 49.9  |                                                                                                                                                                                                                                                                 | 91.2  |       | 95.5  |       | 124.8 |       | 115.1 |       |
| 21617847  | Cryz11      | 348  | 38.7  |                                                                                                                                                                                                                                                                 | 87.6  | 96.8  | 102.6 | 101.7 | 94.3  | 94.6  | 102.7 | 104.8 |
| 226958428 | Ring1       | 406  | 42.6  |                                                                                                                                                                                                                                                                 | 98.5  | 131.8 | 91.2  | 95.2  | 99    | 91.1  | 115.1 | 106.8 |
| 124486923 | Tnks1bp1    | 1720 | 181.7 |                                                                                                                                                                                                                                                                 | 100.5 | 103   | 95.3  | 98.4  | 101.5 | 103.8 | 106.7 | 112.5 |
| 31560697  | H1f0        | 194  | 20.8  |                                                                                                                                                                                                                                                                 | 96.1  | 88.5  | 106.3 | 112.9 | 82.8  | 93.1  | 86.6  | 86.9  |
| 33563266  | Ndufa4      | 82   | 9.3   | Metabolic pathways; Huntington's disease; Non-alcoholic fatty liver disease (NAFLD); Oxidative phosphorylation; Parkinson's disease; Alzheimer's disease                                                                                                        | 114.6 | 112   | 105.5 | 104.4 | 85.7  | 87.3  | 86.5  | 87.7  |
| 270047502 | Ddx41       | 622  | 69.8  |                                                                                                                                                                                                                                                                 | 122.4 | 93.6  | 108.2 | 101.3 | 109.7 | 105.6 | 86.8  | 98.4  |
| 21362283  | Arl6ip4     | 229  | 25.5  |                                                                                                                                                                                                                                                                 | 110.6 | 110.6 | 106.8 | 97.4  | 96.9  | 98.4  | 96.7  | 95.9  |
| 131889222 | Sdr39u1     | 293  | 31.4  |                                                                                                                                                                                                                                                                 | 112.9 | 112.5 | 110.3 | 118.8 | 101.4 | 107.8 | 89.1  | 95.4  |
| 31542143  | Rhoa        | 193  | 21.8  | Oxytocin signaling pathway; Leukocyte transendothelial migration; Endocytosis; mTOR signaling pathway; Wnt signaling pathway; T cell receptor signaling pathway; Phospholipase D signaling pathway; Regulation of actin cytoskeleton; Pancreatic secretion; Mic | 118.6 | 115.1 | 105.2 | 100   | 80.2  | 85.5  | 83.2  | 95.6  |
| 21312410  | Tnfaip8l2   | 184  | 20.6  |                                                                                                                                                                                                                                                                 | 113.4 | 124.6 | 113.3 | 110.4 | 77.1  | 72.7  | 84.2  | 74.2  |
| 13385292  | Rsrc1       | 334  | 38.6  |                                                                                                                                                                                                                                                                 | 106.5 | 113.6 | 97.9  | 94.7  | 97.2  | 105   | 98.5  | 94.4  |
| 225543576 | Gtl3; Cfp20 | 193  | 22.7  |                                                                                                                                                                                                                                                                 | 114.9 | 111.4 | 95.1  | 96.7  | 99    | 97.8  | 71.2  | 64.1  |
| 7305121   | Gyg         | 333  | 37.4  | Metabolic pathways; Starch and sucrose metabolism                                                                                                                                                                                                               | 108.8 | 106.4 | 100.1 | 110.6 | 93.8  | 85.4  | 103.5 | 114.1 |
| 407228373 | Gfm2        | 779  | 86.1  |                                                                                                                                                                                                                                                                 | 116.9 | 115   | 98.7  | 99.7  | 97.7  | 103.5 | 102.5 | 93    |
| 241982820 | Thada       | 1938 | 217.2 |                                                                                                                                                                                                                                                                 | 79.1  | 88.9  | 85.1  | 87.9  | 119.9 | 112.8 | 115.9 | 113   |
| 76781479  | Med22       | 200  | 22.3  |                                                                                                                                                                                                                                                                 | 97.7  | 121.2 | 92.7  | 89.7  | 105   | 101.6 | 105   | 108.7 |

|           |                 |      |       |                                                                                                                                                                                                                                                               |       |       |       |       |       |       |       |       |
|-----------|-----------------|------|-------|---------------------------------------------------------------------------------------------------------------------------------------------------------------------------------------------------------------------------------------------------------------|-------|-------|-------|-------|-------|-------|-------|-------|
| 18390327  | Ppp1r11         | 131  | 14.5  |                                                                                                                                                                                                                                                               | 132.2 | 126.3 | 100.2 | 110.7 | 63.8  | 83    | 86.5  | 99.9  |
| 165932362 | Helb            | 1074 | 121.4 |                                                                                                                                                                                                                                                               | 95.8  | 95.5  | 93.5  | 90.8  | 102.1 | 106.5 | 104.9 | 100.4 |
| 254281313 | Ap3m1           | 418  | 46.9  | Lysosome                                                                                                                                                                                                                                                      | 102.1 | 96.7  | 102.1 | 95.9  | 102.3 | 99    | 115.1 | 104.2 |
| 28077005  | Ndc1;<br>Tmem48 | 673  | 75.4  | RNA transport                                                                                                                                                                                                                                                 | 100   |       | 93.3  |       | 111.9 |       | 101.2 |       |
| 208431800 | Irgq            | 583  | 59.3  |                                                                                                                                                                                                                                                               | 103.5 | 102.9 | 104.6 | 105.4 | 98.6  | 99.1  | 93    | 94.8  |
| 112181182 | Cox5a           | 146  | 16.1  | Metabolic pathways; Huntington's disease; Non-alcoholic fatty liver disease (NAFLD); Oxidative phosphorylation; Parkinson's disease; Alzheimer's disease; Cardiac muscle contraction                                                                          | 124.7 | 122.6 | 107.9 | 109.7 | 93.5  | 94.3  | 74    | 71.2  |
| 8567402   | Srsf3           | 164  | 19.3  | Herpes simplex infection; Spliceosome                                                                                                                                                                                                                         | 105.8 | 107.5 | 101.3 | 101.7 | 89.5  | 94.7  | 100.7 | 99.9  |
| 17975508  | Gbe1            | 702  | 80.3  | Metabolic pathways; Starch and sucrose metabolism                                                                                                                                                                                                             | 115.1 | 109.3 | 98.8  | 98.9  | 94.9  | 95.5  | 92    | 94.1  |
| 224809559 | Nucks1          | 234  | 26.3  |                                                                                                                                                                                                                                                               | 111.9 | 99.6  | 132.9 | 121.9 | 93.6  | 104   | 90.6  | 89.8  |
| 112181204 | Rel             | 588  | 65.1  | Ras signaling pathway; Transcriptional misregulation in cancer; Viral carcinogenesis                                                                                                                                                                          | 82.9  | 82.3  | 73.9  | 79.2  | 123   | 120.4 | 135.1 | 131.8 |
| 188035919 | Gtf2h1          | 547  | 61.8  | Basal transcription factors; Nucleotide excision repair; Viral carcinogenesis                                                                                                                                                                                 | 104   | 113.4 | 94.4  | 93.1  | 98.4  | 120.6 | 104.6 | 100.6 |
| 13937355  | Esd             | 282  | 31.3  | Carbon metabolism                                                                                                                                                                                                                                             | 106.7 | 103.5 | 112.1 | 113.1 | 100.7 | 97.1  | 60    | 66.6  |
| 91176335  | Actr5           | 608  | 68.1  |                                                                                                                                                                                                                                                               | 84.6  | 96.4  | 95.3  | 106.9 | 124.2 | 110.1 | 79.5  | 94.5  |
| 164519039 | Ttc27           | 847  | 96.4  |                                                                                                                                                                                                                                                               | 75.5  | 72.6  | 72.2  | 71.6  | 132.2 | 133   | 137.9 | 130.4 |
| 21704118  | Polr2h          | 150  | 17.1  | RNA polymerase; Epstein-Barr virus infection; Metabolic pathways; Purine metabolism; Huntington's disease; Pyrimidine metabolism: Cytosolic DNA-sensing pathway                                                                                               | 153.2 | 178.9 | 96.1  | 103.4 | 98    | 90.1  | 94.4  | 83.7  |
| 209862913 | Ate1            | 516  | 59    |                                                                                                                                                                                                                                                               | 110.4 | 114.7 | 110.6 | 106.4 | 89.7  | 90.4  | 96.7  | 101.6 |
| 6678493   | Usp10           | 793  | 87    |                                                                                                                                                                                                                                                               | 93.6  | 93.6  | 92.7  | 86    | 112   | 113.1 | 108.3 | 106   |
| 21699058  | Lpcat3          | 487  | 56.1  | Glycerophospholipid metabolism                                                                                                                                                                                                                                | 97.5  | 98.9  | 94.8  | 99.5  | 103.1 | 107.5 | 102   | 91.1  |
| 194328781 | Cyb5r4          | 528  | 59.7  | Amino sugar and nucleotide sugar metabolism                                                                                                                                                                                                                   | 100.8 | 102.3 | 90.4  | 106.5 | 93.4  | 113.9 | 85.9  | 112.1 |
| 29244300  | Armc7           | 198  | 21.6  |                                                                                                                                                                                                                                                               | 122.6 | 125.5 | 114   | 115.6 | 75.9  | 78.8  | 89.9  | 88    |
| 255759941 | Serpinb6a       | 399  | 44.7  |                                                                                                                                                                                                                                                               | 113.7 |       | 103.1 |       | 96.6  |       | 101.2 |       |
| 21450255  | Tor1a           | 333  | 37.8  |                                                                                                                                                                                                                                                               | 100.3 | 101.7 | 91    | 92.5  | 103.4 | 105.3 | 106.4 | 98.2  |
| 27735019  | Lef1            | 397  | 44    | Acute myeloid leukemia; Wnt signaling pathway; Arrhythmogenic right ventricular cardiomyopathy (ARVC); Endometrial cancer; Basal cell carcinoma; Hippo signaling pathway; Breast cancer; Melanogenesis; Adherens junction; Pathways in cancer: Thyroid cancer | 109   | 117.3 | 114.9 | 116.5 | 80.1  | 81.7  | 80.8  | 65    |
| 226874925 | Irf9            | 465  | 51.5  |                                                                                                                                                                                                                                                               | 111.9 | 114.3 | 104.2 | 106   | 86.8  | 88.4  | 91.2  | 88.3  |
| 254588041 | Vps33a          | 598  | 67.5  |                                                                                                                                                                                                                                                               | 102   | 100.9 | 97.4  | 99.2  | 108.5 | 104.9 | 86.9  | 92.3  |
| 21313242  | Naa16           | 864  | 101.2 |                                                                                                                                                                                                                                                               | 85.8  |       | 90.1  |       | 115.4 |       | 115   |       |
| 224809376 | Ncstn           | 708  | 78.4  | Notch signaling pathway; Alzheimer's disease                                                                                                                                                                                                                  | 80.7  | 87.3  | 86.1  | 90.3  | 117.3 | 118.3 | 112.7 | 101.1 |
| 41152099  | Dgcr8           | 773  | 86.3  |                                                                                                                                                                                                                                                               | 87.9  | 86.9  | 87.4  | 84.5  | 115.5 | 111.4 | 120   | 130.7 |
| 119508441 | Psmc9           | 222  | 24.7  |                                                                                                                                                                                                                                                               | 101.5 | 107.4 | 102.9 | 103.3 | 101.9 | 101   | 111.9 | 106.8 |
| 21313224  | Commf9          | 198  | 21.8  |                                                                                                                                                                                                                                                               | 116.7 | 106   | 97.2  | 98.3  | 92.8  | 85.6  | 84.3  | 102.6 |

|           |                             |      |       |                                                                                                                                                                                                                                                                   |       |       |       |       |       |       |       |       |
|-----------|-----------------------------|------|-------|-------------------------------------------------------------------------------------------------------------------------------------------------------------------------------------------------------------------------------------------------------------------|-------|-------|-------|-------|-------|-------|-------|-------|
| 21312153  | Glr5                        | 152  | 16.3  |                                                                                                                                                                                                                                                                   | 134.5 | 109   | 110.1 | 97.6  | 78.6  | 83.8  | 86.3  | 99.3  |
| 27369505  | Poglut1                     | 392  | 46.4  | Other types of O-glycan biosynthesis                                                                                                                                                                                                                              | 96.3  | 107.8 | 86.4  | 95.3  | 112.4 | 98.9  | 105.5 | 88.5  |
| 27370250  | Malt1                       | 821  | 92    | T cell receptor signaling pathway; Tuberculosis; B cell receptor signaling pathway; NF-kappa B signaling pathway                                                                                                                                                  | 98.4  | 98    | 81.7  | 96.9  | 106.1 | 95.1  | 122.5 | 113.7 |
| 165905619 | Ccdc86                      | 426  | 46.5  |                                                                                                                                                                                                                                                                   | 94    | 96.8  | 94.9  | 98.8  | 108.4 | 107.8 | 122.1 | 115.6 |
| 21312546  | Fam162a                     | 155  | 17.7  |                                                                                                                                                                                                                                                                   | 83    | 74.9  | 73.3  | 73.9  | 120.2 | 125.6 | 134.5 | 137.2 |
| 261862337 | Rbm3                        | 154  | 16.8  |                                                                                                                                                                                                                                                                   | 115.5 | 103.7 | 106   | 96.2  | 96.8  | 92.1  | 76    | 99.4  |
| 19527284  | Akr1c18                     | 323  | 37.2  | Steroid hormone biosynthesis                                                                                                                                                                                                                                      | 51.8  | 55.2  | 50.7  | 48.5  | 117.5 | 120.8 | 125.5 | 129.6 |
| 239985588 | Chd1                        | 1711 | 196.3 |                                                                                                                                                                                                                                                                   | 90.5  | 88    | 88.6  | 87.9  | 112.7 | 105   | 118.8 | 123.7 |
| 31981592  | Ehd4                        | 541  | 61.4  | Endocytosis                                                                                                                                                                                                                                                       | 91.9  | 88.2  | 96.5  | 125.3 | 109.4 | 127.6 | 113.8 | 114.7 |
| 13385810  | 2610029G<br>23Rik;<br>Pbdc1 | 198  | 22.2  |                                                                                                                                                                                                                                                                   | 178.4 | 217.7 | 88.6  | 85    | 88.5  | 88.7  | 88.6  | 80.9  |
| 124487195 | Phf2011                     | 1013 | 113.8 |                                                                                                                                                                                                                                                                   | 87.5  | 96.2  | 99.5  | 108.1 | 98    | 92.9  | 109.2 | 99.7  |
| 9789991   | Hsd17b12                    | 312  | 34.7  | Fatty acid metabolism; Steroid hormone biosynthesis; Metabolic pathways; Fatty acid elongation; Biosynthesis of unsaturated fatty acids                                                                                                                           | 89.2  | 91    | 114.1 | 107.5 | 132.1 | 114.4 | 102   | 106.5 |
| 219283246 | Gm20604                     | 75   | 7.9   |                                                                                                                                                                                                                                                                   | 115.9 | 127.9 | 112.8 | 125.4 | 86.7  | 81.6  | 112.7 | 90.2  |
| 19526884  | Gmppa                       | 420  | 46.2  | Metabolic pathways; Amino sugar and nucleotide sugar metabolism; Fructose and mannose metabolism                                                                                                                                                                  | 105.3 | 108.2 | 100.8 | 99.6  | 95.9  | 97.5  | 102.4 | 98    |
| 139948914 | Pars2                       | 511  | 57.7  |                                                                                                                                                                                                                                                                   | 116.3 | 90.7  | 97.2  | 99.8  | 95.9  | 121.7 | 81.9  | 129.8 |
| 85701822  | Rltpr;<br>Camil2            | 738  | 79.7  |                                                                                                                                                                                                                                                                   | 96.3  | 98.8  | 95.3  | 98.3  | 104.9 | 101.7 | 94.4  | 98.5  |
| 254281343 | Agpat1                      | 285  | 31.7  | Phospholipase D signaling pathway; Fat digestion and absorption; Metabolic pathways; Glycerophospholipid metabolism; Glycerolipid metabolism                                                                                                                      | 104.7 | 111   | 100   | 100.1 | 90.6  | 87.7  | 94.4  | 91.3  |
| 86476059  | Wdr37                       | 496  | 55    |                                                                                                                                                                                                                                                                   | 97.8  | 100.4 | 110.6 | 110.8 | 94.2  | 98.9  | 98.8  | 101.6 |
| 19527378  | Tmem109                     | 243  | 26.3  |                                                                                                                                                                                                                                                                   | 100.5 | 100.3 | 95    | 98.8  | 108.2 | 111.7 | 107.2 | 106.5 |
| 19527374  | Wdr74                       | 384  | 42.6  |                                                                                                                                                                                                                                                                   | 93.9  | 97.9  | 87    | 94.3  | 119   | 108.9 | 109.2 | 116.9 |
| 229577450 | Gm17296;<br>Tarbp1          | 1579 | 175.6 |                                                                                                                                                                                                                                                                   | 93.9  | 112.2 | 78.3  | 78.9  | 117.3 | 120.1 | 118.8 | 117.9 |
| 27228990  | Snrnp27                     | 155  | 18.9  | Spliceosome                                                                                                                                                                                                                                                       | 92.5  | 96.4  | 96.7  | 98.9  | 100   | 93.7  | 109.8 | 108.3 |
| 15100156  | Mms19                       | 1031 | 113   |                                                                                                                                                                                                                                                                   | 104.7 | 103.3 | 97.5  | 96.2  | 105.7 | 107.2 | 89.1  | 87.5  |
| 124107594 | Pdpk1                       | 559  | 63.7  | FoxO signaling pathway; PPAR signaling pathway; mTOR signaling pathway; Platinum drug resistance; T cell receptor signaling pathway; Focal adhesion; Insulin signaling pathway; Endometrial cancer; Toxoplasmosis; Insulin resistance; Non-small cell lung cancer | 107.3 | 104.6 | 94.1  | 99.8  | 138.7 | 128.4 | 91.6  | 85.7  |
| 116517342 | Tsc22d3                     | 137  | 15.2  |                                                                                                                                                                                                                                                                   | 112.3 | 126.2 | 102.4 | 98.2  | 96.2  | 100.4 | 98.5  | 90.7  |
| 321267585 | Rrp8                        | 503  | 56.5  |                                                                                                                                                                                                                                                                   | 101.1 | 101.3 | 99    | 97.2  | 101.9 | 105.5 | 104.9 | 105.3 |
| 40254521  | Mob4                        | 225  | 26    |                                                                                                                                                                                                                                                                   | 106.3 | 118.6 | 106.9 | 95.1  | 104.9 | 112.5 | 101.4 | 93    |
| 224809300 | Tubal3                      | 446  | 50    | Phagosome; Gap junction; Apoptosis                                                                                                                                                                                                                                | 86.5  | 92.4  | 98.6  | 92.1  | 123.4 | 116.6 | 109.1 | 110.5 |

|           |                      |      |       |                                                                                                                                                                                                                                                                 |       |       |       |       |       |       |       |       |
|-----------|----------------------|------|-------|-----------------------------------------------------------------------------------------------------------------------------------------------------------------------------------------------------------------------------------------------------------------|-------|-------|-------|-------|-------|-------|-------|-------|
| 19527240  | Tbc1d10a             | 500  | 56.2  |                                                                                                                                                                                                                                                                 | 106   | 102.8 | 100.9 | 119.8 | 101.7 | 100.2 | 90.4  | 82.6  |
| 210147539 | Cnot2                | 550  | 60.8  |                                                                                                                                                                                                                                                                 | 102.2 | 85.3  | 103.2 | 107.9 | 104.7 | 107.1 | 99.5  | 106.6 |
| 6754870   | Emc8                 | 207  | 23.3  |                                                                                                                                                                                                                                                                 | 95.6  | 86.1  | 90.3  | 90.1  | 111.1 | 121.3 | 109.9 | 109.8 |
| 153792729 | Mrpl24               | 216  | 24.9  | Ribosome                                                                                                                                                                                                                                                        | 106.1 | 104.1 | 115.8 | 104.9 | 99.1  | 107.2 | 96    | 108.1 |
| 407262256 | Gm17748              | 264  | 29.1  |                                                                                                                                                                                                                                                                 | 108.8 | 107.8 | 108.1 | 109   | 91.3  | 86.7  | 83.4  | 87.4  |
| 31560404  | Gltp                 | 209  | 23.7  |                                                                                                                                                                                                                                                                 | 194.7 | 109.7 | 106.2 | 121   | 69    | 91.1  | 81.3  | 84.5  |
| 90093349  | Adnp                 | 1108 | 124.2 |                                                                                                                                                                                                                                                                 | 93    | 92.2  | 105.8 | 96.4  | 107   | 91.7  | 81.2  | 98.6  |
| 260099682 | Mettl14              | 456  | 52.1  |                                                                                                                                                                                                                                                                 | 120.9 | 114.7 | 95.5  | 103.6 | 119.6 | 109   | 93.3  | 90.5  |
| 84490421  | Gng2                 | 71   | 7.8   | Morphine addiction; Cholinergic synapse; Retrograde endocannabinoid signaling; Dopaminergic synapse; Ras signaling pathway; GABAergic synapse; Chemokine signaling pathway; Glutamatergic synapse; Pathways in cancer; Alcoholism; PI3K-Akt signaling pathway   | 90.2  | 96.7  | 83.3  | 99.6  | 113.5 | 106.1 | 122.7 | 99.7  |
| 170014698 | Cul2                 | 745  | 86.8  | Ubiquitin mediated proteolysis; HIF-1 signaling pathway; Pathways in cancer; Renal cell carcinoma                                                                                                                                                               | 103   | 94.8  | 87.2  | 93    | 117.5 | 109.2 | 105.4 | 112.3 |
| 304307779 | Pag1                 | 429  | 46.5  |                                                                                                                                                                                                                                                                 | 120.2 | 129   | 115.2 | 120.4 | 84    | 75.5  | 89.2  | 83.7  |
| 255760052 | Cops7a               | 277  | 30.4  |                                                                                                                                                                                                                                                                 | 94.1  | 94.3  | 91.3  | 94    | 103.3 | 109.1 | 107   | 105.8 |
| 283484016 | Nup62-il4i1; Gm21948 | 638  | 71.1  | Tryptophan metabolism; Valine, leucine and isoleucine degradation; Metabolic pathways; Phenylalanine, tyrosine and tryptophan biosynthesis; Cysteine and methionine metabolism; Alanine, aspartate and glutamate metabolism; Phenylalanine metabolism; Tyrosine | 117   | 109.8 | 107.7 | 107.7 | 84.2  | 92.6  | 81.8  | 89.5  |
| 29789323  | Prmt3                | 528  | 59.4  |                                                                                                                                                                                                                                                                 | 96.7  | 102   | 87.2  | 96.3  | 111.8 | 101.8 | 113.3 | 98.9  |
| 18158418  | Ovca2                | 225  | 24.2  |                                                                                                                                                                                                                                                                 | 117.9 | 107.1 | 117.5 | 122.4 | 87.8  | 95.3  | 89.4  | 93.1  |
| 31980806  | Pgrmc1               | 195  | 21.7  |                                                                                                                                                                                                                                                                 | 103.1 | 106.2 | 95.8  | 95.4  | 109.8 | 104.2 | 85.9  | 86.8  |
| 94536791  | Flot2                | 428  | 47    | Insulin signaling pathway                                                                                                                                                                                                                                       | 134.2 | 102.1 | 100.6 | 101.6 | 103.4 | 102.1 | 90    | 102.1 |
| 225703114 | Hscb                 | 234  | 26.7  |                                                                                                                                                                                                                                                                 | 107.4 | 106.4 | 104.9 | 106.7 | 94.4  | 101.7 | 88.7  | 93.1  |
| 254587936 | Mrps28               | 186  | 20.5  |                                                                                                                                                                                                                                                                 | 98.1  | 89.1  | 75.1  | 84.8  | 139.6 | 129.5 | 110.9 | 106.8 |
| 87162464  | Hdac2                | 488  | 55.3  | Epstein-Barr virus infection; Huntington's disease; Transcriptional misregulation in cancer; Notch signaling pathway; Thyroid hormone signaling pathway; Cell cycle; Pathways in cancer; Alcoholism; Viral carcinogenesis; Chronic myeloid leukemia; Longevity  | 104.3 | 88    | 103.9 | 78.5  | 81.8  | 102.4 | 101.8 | 116.5 |
| 205361112 | Dnaja3               | 480  | 52.4  | Viral carcinogenesis                                                                                                                                                                                                                                            | 96.6  | 99.6  | 99.1  | 92.4  | 111.7 | 107.5 | 103.7 | 82.5  |
| 22122457  | Rhot2                | 620  | 69    |                                                                                                                                                                                                                                                                 | 99.2  | 90.9  | 94.1  | 91.7  | 107.9 | 112.3 | 110.2 | 111.5 |
| 256665243 | Cpsf7                | 471  | 52    | mRNA surveillance pathway                                                                                                                                                                                                                                       | 112.6 | 120.8 | 105.2 | 104.8 | 81    | 83.2  | 90.5  | 90.3  |
| 9507097   | Sh3glb1              | 365  | 40.8  | Endocytosis                                                                                                                                                                                                                                                     | 95.8  | 96.5  | 94.8  | 95.5  | 106.5 | 101   | 109.1 | 104.5 |
| 124430553 | Cdan1                | 1239 | 135.8 |                                                                                                                                                                                                                                                                 | 106   | 102.5 | 94.8  | 98    | 99    | 105.5 | 106   | 101.3 |

|           |                                                                          |      |       |                                                                                                                                                                                                                                                                 |       |       |       |       |       |       |       |       |
|-----------|--------------------------------------------------------------------------|------|-------|-----------------------------------------------------------------------------------------------------------------------------------------------------------------------------------------------------------------------------------------------------------------|-------|-------|-------|-------|-------|-------|-------|-------|
| 6678245   | Tcf7                                                                     | 303  | 33.6  | Acute myeloid leukemia; Wnt signaling pathway; Arrhythmogenic right ventricular cardiomyopathy (ARVC); Endometrial cancer; Basal cell carcinoma; Hippo signaling pathway; Breast cancer; Melanogenesis; Adherens junction; Pathways in cancer: Thyroid cancer   | 119.4 | 137.4 | 101   | 98.5  | 78    | 81.9  | 79.7  | 74.8  |
| 165377251 | Cobra1;<br>Nelfb                                                         | 580  | 65.6  |                                                                                                                                                                                                                                                                 | 100.1 | 130.4 | 96.2  | 100.8 | 101.7 | 95.3  | 83.1  | 80.5  |
| 300863147 | Dennd4c                                                                  | 1906 | 211.3 |                                                                                                                                                                                                                                                                 | 116.9 | 116.3 | 95.9  | 98    | 97.6  | 90.1  | 94    | 95.2  |
| 124249077 | Polr2e                                                                   | 210  | 24.6  | RNA polymerase; Epstein-Barr virus infection; Metabolic pathways; Purine metabolism; Huntington's disease; Pyrimidine metabolism: Cytosolic DNA-sensing pathway                                                                                                 | 97.5  | 101   | 97    | 98.3  | 101.7 | 102.8 | 124.9 | 102.1 |
| 244792921 | Pik3r2                                                                   | 722  | 81.2  | Oxytocin signaling pathway; ErbB signaling pathway; FoxO signaling pathway; Leukocyte transendothelial migration; Acute myeloid leukemia; AGE-RAGE signaling pathway in diabetic complications; mTOR signaling pathway: Cholinergic synapse: Platinum drug resi | 117.8 |       | 86    |       | 104.9 |       | 124.7 |       |
| 7305631   | Vps45                                                                    | 570  | 65    | Endocytosis                                                                                                                                                                                                                                                     | 111.6 | 107.8 | 96.1  | 92    | 98.7  | 116.4 | 93.7  | 98.6  |
| 74096448  | Far1                                                                     | 515  | 59.4  | Peroxisome                                                                                                                                                                                                                                                      | 78.4  | 76.7  | 78    | 75.5  | 125.8 | 137.9 | 133.8 | 117.6 |
| 24497431  | Nupl1                                                                    | 587  | 59.4  | RNA transport                                                                                                                                                                                                                                                   | 94.2  | 92.8  | 87.8  | 87.9  | 112.7 | 106.7 | 112.4 | 109.4 |
| 83715998  | Atp5k                                                                    | 71   | 8.2   | Metabolic pathways; Oxidative phosphorylation                                                                                                                                                                                                                   | 96.2  | 99.4  | 93.8  | 96.9  | 102.9 | 100.2 | 118.7 | 111.9 |
| 21886811  | S100a11                                                                  | 98   | 11.1  |                                                                                                                                                                                                                                                                 | 119.5 |       | 97.2  |       | 83    |       | 108.2 |       |
| 114145487 | Rragc                                                                    | 398  | 44.1  | mTOR signaling pathway                                                                                                                                                                                                                                          | 100.5 | 99.4  | 98.3  | 98.4  | 98.6  | 97.2  | 93    | 97    |
| 40254624  | Pafah1b2                                                                 | 229  | 25.6  | Metabolic pathways; Ether lipid metabolism                                                                                                                                                                                                                      | 109   | 106.3 | 114.9 | 113.7 | 96    | 88.9  | 92.2  | 92.7  |
| 13385084  | Nipsnap3b                                                                | 247  | 28.3  |                                                                                                                                                                                                                                                                 | 115.6 | 122.5 | 109.7 | 111.7 | 88.2  | 83.9  | 82.8  | 87.5  |
| 164518904 | Vps26a                                                                   | 359  | 41.5  |                                                                                                                                                                                                                                                                 | 103.1 | 105.1 | 101.5 | 99.9  | 94.1  | 93.9  | 95.5  | 96.7  |
| 21703810  | Ubr4;<br>Ubl4a;<br>Slc10a3-<br>ubl4;<br>Gm38419;<br>SlcUbl4a;<br>Gm44504 | 157  | 17.8  |                                                                                                                                                                                                                                                                 | 94.1  | 95.8  | 89.1  | 88.5  | 113.6 | 112.9 | 95.5  | 101.5 |
| 6681069   | Csrp1                                                                    | 193  | 20.6  |                                                                                                                                                                                                                                                                 | 120.8 | 117.5 | 113.7 | 112.4 | 83.8  | 85.1  | 90.9  | 90.8  |
| 253970463 | Fn3krp                                                                   | 309  | 34.4  |                                                                                                                                                                                                                                                                 | 93.4  | 81.8  | 120.4 | 124.6 | 106.5 | 106.1 | 90.2  | 95.4  |
| 139948465 | Fbxo22                                                                   | 402  | 44.2  |                                                                                                                                                                                                                                                                 | 136.5 | 117.9 | 115.3 | 161.2 | 77.1  | 94.6  | 86.9  | 80.6  |
| 33859654  | Map2k6                                                                   | 334  | 37.4  | MAPK signaling pathway; Amyotrophic lateral sclerosis (ALS); TNF signaling pathway; Toxoplasmosis; Epstein-Barr virus infection; Osteoclast differentiation; Toll-like receptor signaling pathway; Rap1 signaling pathway; Influenza A: GnRH signaling pathway  | 123.7 | 115.4 | 106.9 | 115   | 78.2  | 88.9  | 77.3  | 76.4  |
| 76096364  | Ppcs                                                                     | 311  | 33.8  | Metabolic pathways; Pantothenate and CoA biosynthesis                                                                                                                                                                                                           | 104.8 | 102.9 | 103   | 103.1 | 96    | 95.1  | 93.7  | 99.7  |
| 260763874 | Arfrp1                                                                   | 201  | 22.6  |                                                                                                                                                                                                                                                                 | 71.6  | 98.8  | 126.9 | 93.6  | 116   | 95.6  | 95.9  | 111.7 |
| 56790942  | Diexf                                                                    | 768  | 88.2  |                                                                                                                                                                                                                                                                 | 93.9  | 98.7  | 93.5  | 92.8  | 109.3 | 107.9 | 111.3 | 113.7 |

|           |                  |      |       |                                                                                                                                                                                                                                                                 |       |       |       |       |       |       |       |       |
|-----------|------------------|------|-------|-----------------------------------------------------------------------------------------------------------------------------------------------------------------------------------------------------------------------------------------------------------------|-------|-------|-------|-------|-------|-------|-------|-------|
| 30794164  | Cltb             | 211  | 23.2  | Endocytosis; Endocrine and other factor-regulated calcium reabsorption; Lysosome; Huntington's disease; Synaptic vesicle cycle; Bacterial invasion of epithelial cells                                                                                          | 108.2 | 118.6 | 107.1 | 114.8 | 88.1  | 83    | 106.9 | 102.3 |
| 23346437  | Sf3b4            | 424  | 44.3  | Spliceosome                                                                                                                                                                                                                                                     | 95.9  | 101.5 | 105.2 | 107.2 | 96.4  | 95.7  | 78.8  | 78.5  |
| 83627717  | Eif4e            | 217  | 25    | mTOR signaling pathway; Insulin signaling pathway; Longevity regulating pathway; HIF-1 signaling pathway; PI3K-Akt signaling pathway; EGFR tyrosine kinase inhibitor resistance; RNA transport                                                                  | 85.1  | 85.5  | 88.7  | 89.5  | 126   | 131   | 120   | 122.3 |
| 21312876  | Trmt10c          | 414  | 48.4  |                                                                                                                                                                                                                                                                 | 98.8  | 100.4 | 92.3  | 98.5  | 102.9 | 107.4 | 117.3 | 116   |
| 168823441 | Ccdc109a;<br>Mcu | 350  | 39.7  | NOD-like receptor signaling pathway; Calcium signaling pathway                                                                                                                                                                                                  | 81.6  | 89.4  | 82    | 94    | 132.9 | 128.3 | 124.1 | 111.7 |
| 282154803 | Nfu1             | 256  | 28.6  |                                                                                                                                                                                                                                                                 | 127.7 | 109.3 | 95.5  | 91.6  | 103.3 | 105.8 | 100.5 | 117   |
| 158854007 | Pithd1           | 211  | 24.2  |                                                                                                                                                                                                                                                                 | 112.3 | 98.7  | 118.8 | 106.6 | 80.9  | 98.2  | 98.2  | 95.4  |
| 169234780 | Ncapg            | 1004 | 112.8 |                                                                                                                                                                                                                                                                 | 95.3  | 61.7  | 87.6  | 61.2  | 126.6 | 140.5 | 115.9 | 143.2 |
| 27477043  | Efha1;<br>Micu2  | 432  | 49.4  |                                                                                                                                                                                                                                                                 | 95.4  | 107.3 | 90.9  | 91.6  | 108.3 | 109   | 111.8 | 103.7 |
| 114155155 | Med8             | 268  | 29.2  | Herpes simplex infection                                                                                                                                                                                                                                        |       | 94.8  |       | 106.2 |       | 101.2 |       | 97.8  |
| 269954704 | Haus4            | 363  | 42.2  |                                                                                                                                                                                                                                                                 | 97.1  | 92.9  | 83    | 85.5  | 109.4 | 117.7 | 166.4 | 127.3 |
| 9903607   | Cnpy2            | 182  | 20.8  |                                                                                                                                                                                                                                                                 | 96    | 98.9  | 81.1  | 79.5  | 117.1 | 113.7 | 123.9 | 126.3 |
| 13384718  | Ube2d3           | 147  | 16.7  | Ubiquitin mediated proteolysis; Protein processing in endoplasmic reticulum                                                                                                                                                                                     | 114.8 | 110.9 | 105.9 | 104.2 | 95.3  | 94.9  | 94.5  | 94.2  |
| 34328255  | Foxo1            | 652  | 69.5  | FoxO signaling pathway; AGE-RAGE signaling pathway in diabetic complications; Insulin signaling pathway; Insulin resistance; Longevity regulating pathway; Transcriptional misregulation in cancer; Thyroid hormone signaling pathway; Pathways in cancer; AMPK | 114.6 | 114   | 106.3 | 113.5 | 88.3  | 80.2  | 87.5  | 77.4  |
| 255308928 | Hip1r            | 1068 | 119.4 |                                                                                                                                                                                                                                                                 | 103.6 | 109.4 | 97.7  | 108.6 | 93.9  | 100.4 | 102.8 | 94.3  |
| 148747546 | Serpina3k        | 418  | 46.6  |                                                                                                                                                                                                                                                                 | 128.6 | 112.6 | 126.7 | 83.7  | 80.9  | 130.9 | 80.4  | 101.5 |
| 153792131 | Pklr             | 574  | 62.2  |                                                                                                                                                                                                                                                                 | 103.3 | 102.6 | 107.6 | 109.9 | 86.8  | 91.2  | 64.9  | 74.1  |
| 34538608  | ND5              | 607  | 68.4  | Metabolic pathways; Oxidative phosphorylation; Parkinson's disease                                                                                                                                                                                              | 98    | 98.2  | 103.1 | 104.1 | 100.5 | 98.6  | 100.9 | 99.9  |
| 7305579   | Timm8b           | 83   | 9.3   |                                                                                                                                                                                                                                                                 | 106.9 | 107.2 | 101   | 100.2 | 94.7  | 91.9  | 90.5  | 99.4  |
| 238637273 | Trappc12         | 797  | 87.6  |                                                                                                                                                                                                                                                                 | 93.9  | 105.7 | 168.1 | 115.4 | 92    | 93.9  | 91.7  | 97.5  |
| 40353214  | Suz12            | 741  | 83    |                                                                                                                                                                                                                                                                 | 107.7 | 90.9  | 100.4 | 94.7  | 105.1 | 105.3 | 108.2 | 113.2 |
| 162287383 | Lrmp             | 539  | 59.4  |                                                                                                                                                                                                                                                                 | 100.2 | 102.5 | 88    | 87.8  | 109.4 | 112.8 | 113   | 112.2 |
| 254553424 | Thoc3            | 351  | 38.7  | Spliceosome; RNA transport                                                                                                                                                                                                                                      | 100   | 99    | 98.3  | 97.5  | 102.3 | 99.3  | 91.7  | 94    |
| 356582311 | Rpl31            | 125  | 14.5  | Ribosome                                                                                                                                                                                                                                                        | 116.1 | 125   | 100.8 | 101.6 | 95.4  | 100.9 | 67.6  | 62.3  |
| 33468969  | Tbl1x            | 527  | 56.8  | Wnt signaling pathway                                                                                                                                                                                                                                           |       |       |       |       |       |       |       |       |
| 21450249  | BC005624         | 289  | 33.5  |                                                                                                                                                                                                                                                                 | 110.5 | 114.3 | 97.5  | 106.9 | 91.4  | 90.6  | 105.6 | 110.3 |
| 83745137  | Atp11c           | 1129 | 129.2 |                                                                                                                                                                                                                                                                 | 104.6 | 102.9 | 99.5  | 99.5  | 103.5 | 117.3 | 82.2  | 79.8  |
| 27883848  | Atg4b            | 393  | 44.4  | Autophagy                                                                                                                                                                                                                                                       | 89    | 89.6  | 84.1  | 84.5  | 128.7 | 111.9 | 116.4 | 100.4 |

|           |                              |      |       |                                                                                                                                                                                                                                                                  |       |       |       |       |       |       |       |       |
|-----------|------------------------------|------|-------|------------------------------------------------------------------------------------------------------------------------------------------------------------------------------------------------------------------------------------------------------------------|-------|-------|-------|-------|-------|-------|-------|-------|
| 357197177 | Smad2                        | 467  | 52.2  | FoxO signaling pathway; AGE-RAGE signaling pathway in diabetic complications; Endocytosis; Chagas disease (American trypanosomiasis); Hippo signaling pathway; Signaling pathways regulating pluripotency of stem cells; HTI V-L infection; Adherens junction; I | 113.6 | 104.4 | 99    | 104   | 101.9 | 96.5  | 92.5  | 105.9 |
| 46048300  | E430025E<br>21Rik;<br>Washc5 | 1159 | 134   | Endocytosis                                                                                                                                                                                                                                                      | 112.5 | 111.5 | 109.1 | 104.6 | 100.7 | 95.5  | 88.7  | 87.6  |
| 226342967 | Plcl2                        | 1128 | 125.7 |                                                                                                                                                                                                                                                                  | 97.3  | 96.8  | 99.7  | 98.8  | 97.2  | 93.6  | 100.9 | 101.8 |
| 13385746  | Mrfap1                       | 125  | 14.2  |                                                                                                                                                                                                                                                                  | 93.2  |       | 84.6  |       | 113.6 |       | 136   |       |
| 51921285  | Git1                         | 770  | 85.2  | Endocytosis; Regulation of actin cytoskeleton                                                                                                                                                                                                                    | 107   | 101.1 | 90.1  | 100.5 | 111.9 | 112.8 | 100.1 | 99.1  |
| 31981994  | Noc4l                        | 516  | 58.6  |                                                                                                                                                                                                                                                                  | 69.7  | 76.5  | 73.5  | 85.1  | 143.6 | 130.4 | 123.3 | 124.1 |
| 31981588  | Atp6v1h                      | 483  | 55.8  | mTOR signaling pathway; Rheumatoid arthritis; Metabolic pathways; Tuberculosis; Lysosome; Phagosome; Oxidative phosphorylation; Synaptic vesicle cycle                                                                                                           | 100.8 | 107.1 | 93.9  | 89    | 93.9  | 103   | 105.2 | 110.3 |
| 309262452 | Gm11703                      | 160  | 18.6  |                                                                                                                                                                                                                                                                  | 74.5  | 77.4  | 96.9  | 94.1  | 112.2 | 111.4 | 116.1 | 119.5 |
| 9790219   | Dstn                         | 165  | 18.5  |                                                                                                                                                                                                                                                                  | 120   | 118.6 | 90.9  | 97.1  | 60.4  | 63.3  | 48.6  | 43.2  |
| 6680019   | Gclm                         | 274  | 30.5  | Glutathione metabolism; Metabolic pathways; Cysteine and methionine metabolism                                                                                                                                                                                   | 96.6  | 92.4  | 85.6  | 90.9  | 102.3 | 100.1 | 109.5 | 115.1 |
| 21312048  | Mphosph6                     | 161  | 19.1  | RNA degradation                                                                                                                                                                                                                                                  | 117.4 | 115.1 | 103.7 | 105.2 | 90.3  | 90.3  | 104.9 | 103.1 |
| 75677522  | Tradd;<br>LOC1052<br>42493   | 310  | 34.6  | TNF signaling pathway; Epstein-Barr virus infection; RIG-I-like receptor signaling pathway; Tuberculosis; Sphingolipid signaling pathway; Hepatitis C; Adipocytokine signaling pathway; NF-kappa B signaling pathway; Viral carcinogenesis; Apoptosis            | 95.9  | 100.1 | 115.1 | 105.7 | 102.8 | 101.4 | 96.1  | 89.8  |
| 109809757 | Hvcn1                        | 269  | 31.2  |                                                                                                                                                                                                                                                                  | 107.9 |       | 107   |       | 83.3  |       | 87.6  |       |
| 227497256 | Prpf38a                      | 312  | 37.4  | Spliceosome                                                                                                                                                                                                                                                      | 88.8  | 89.8  | 90.8  | 92.1  | 110.6 | 108.8 | 113.9 | 113.3 |
| 255003746 | Mrpl40                       | 206  | 24.3  |                                                                                                                                                                                                                                                                  | 88.4  | 86.5  | 85.6  | 90.8  | 115.4 | 114.2 | 142.5 | 131.4 |
| 145966911 | Tmed9                        | 235  | 27.1  |                                                                                                                                                                                                                                                                  | 94.3  | 93.6  | 87.9  | 89    | 107.3 | 106.3 | 106.8 | 106.6 |
| 165377193 | Isg20                        | 181  | 20.6  |                                                                                                                                                                                                                                                                  | 103.4 | 104.9 | 99.2  | 103.9 | 85.8  | 85.3  | 87.8  | 85.5  |
| 38348460  | 4930572J<br>05Rik;<br>Them6  | 207  | 23.8  |                                                                                                                                                                                                                                                                  | 97.8  | 103   | 255.9 | 214.1 | 69.1  | 78.8  | 70.4  | 75.1  |
| 27369842  | Srek1                        | 494  | 56.7  |                                                                                                                                                                                                                                                                  | 103.5 | 102   | 93.3  | 86.1  | 97.4  | 98.6  | 107   | 116.9 |
| 31542095  | Tm9sf4                       | 643  | 74.6  |                                                                                                                                                                                                                                                                  | 88.6  | 87    | 81.9  | 80.1  | 120.2 | 123.2 | 122.7 | 131.9 |
| 29243984  | Psd4                         | 1005 | 112.7 | Endocytosis                                                                                                                                                                                                                                                      | 104.8 | 108.8 | 104.4 | 109.7 | 96.8  | 108.1 | 90.4  | 88.6  |
| 257153392 | Ufd11;<br>Ufd1               | 307  | 34.5  | Protein processing in endoplasmic reticulum                                                                                                                                                                                                                      | 107.2 | 103.1 | 99.1  | 98.2  | 96.1  | 94    | 102.2 | 111.8 |
| 10946578  | Tmsb4x                       | 44   | 5.1   | Regulation of actin cytoskeleton                                                                                                                                                                                                                                 | 123.1 | 127.8 | 146.9 | 141.8 | 61.7  | 56.8  | 82.5  | 80.4  |
| 51092303  | Gm5409                       | 246  | 26.5  |                                                                                                                                                                                                                                                                  | 104   | 99.6  | 85.4  | 85.9  | 118   | 121.2 | 87.7  | 86.4  |
| 121247429 | Xpc                          | 930  | 104.5 | Nucleotide excision repair                                                                                                                                                                                                                                       | 93.4  | 78.9  | 97.4  | 106.1 | 88.5  | 94.4  | 88.5  | 115.1 |
| 257096048 | Sra1                         | 232  | 25.5  |                                                                                                                                                                                                                                                                  | 116.7 | 106.2 | 102.9 | 97.9  | 89.5  | 95.8  | 108.8 | 109.7 |
| 13385086  | Pomp                         | 141  | 15.8  | Proteasome                                                                                                                                                                                                                                                       | 98.9  | 96.7  | 78.6  | 95.1  | 106.9 | 106.4 | 119   | 102.9 |

|           |             |      |       |                                                                                                                                                                                              |       |       |       |       |       |       |       |       |
|-----------|-------------|------|-------|----------------------------------------------------------------------------------------------------------------------------------------------------------------------------------------------|-------|-------|-------|-------|-------|-------|-------|-------|
| 269784644 | Zfp326      | 580  | 65.1  |                                                                                                                                                                                              | 87    | 94.1  | 142.8 | 138.3 | 94.6  | 92.7  | 89.8  | 85.3  |
| 247494089 | Yrdc        | 280  | 29.4  |                                                                                                                                                                                              | 99.9  | 118.4 | 97.8  | 97.1  | 106   | 93.8  | 105.7 | 87.8  |
| 262263299 | Gemin5      | 1503 | 166.6 |                                                                                                                                                                                              | 83.8  | 95.7  | 90.6  | 91.5  | 114.5 | 115.5 | 120.3 | 113.7 |
| 126723792 | Snx27       | 539  | 61    |                                                                                                                                                                                              | 98    | 99    | 101   | 105   | 99    | 100.5 | 101.3 | 101   |
| 254939625 | Rab37       | 223  | 24.7  |                                                                                                                                                                                              | 109.9 | 120.8 | 114.3 | 121.1 | 98.2  | 86.7  | 104   | 89.5  |
| 30794464  | Prpf38b     | 542  | 63.7  | Spliceosome                                                                                                                                                                                  | 101   | 99.2  | 115.6 | 115.3 | 102.7 | 99.3  | 77.9  | 76.1  |
| 102468565 | Txnrd2      | 527  | 56.8  | Selenocompound metabolism; Pyrimidine metabolism                                                                                                                                             | 124.2 | 130.2 | 103.2 | 108.4 | 114.7 | 126.2 | 80.6  | 78.3  |
| 13385036  | Rpl15       | 204  | 24.1  | Ribosome                                                                                                                                                                                     | 96.3  | 91.5  | 88.8  | 90.1  | 109.4 | 111.9 | 118.3 | 113   |
| 188528894 | Tm9sf2      | 662  | 75.3  |                                                                                                                                                                                              | 102.9 | 97.1  | 93.5  | 87.3  | 104.2 | 106.3 | 118.4 | 102.4 |
| 190684705 | Imp4        | 291  | 33.6  | Ribosome biogenesis in eukaryotes                                                                                                                                                            | 101.9 | 95.9  | 95.4  | 90.9  | 122.5 | 115.7 | 106.2 | 102.5 |
| 124487135 | Uppt        | 310  | 34.3  | Metabolic pathways; Pyrimidine metabolism                                                                                                                                                    | 101.5 | 108.6 | 105.2 | 90.7  | 115.9 | 118   | 87.5  | 93    |
| 21624609  | Bphl        | 291  | 32.8  |                                                                                                                                                                                              | 115.7 | 111.8 | 122.8 | 138.4 | 80.4  | 107.8 | 63.2  | 63.9  |
| 34328187  | Nck1        | 377  | 42.9  | ErbB signaling pathway; T cell receptor signaling pathway; Axon guidance                                                                                                                     | 103.3 | 103.7 | 103.2 | 108   | 96.3  | 100.3 | 99    | 97.2  |
| 31980842  | Pcyt2       | 404  | 45.2  | Metabolic pathways; Glycerophospholipid metabolism                                                                                                                                           | 104.7 | 104.4 | 95.8  | 88.7  | 95.5  | 93.4  | 106.3 | 99.2  |
| 110625701 | Sigirr      | 409  | 46.1  |                                                                                                                                                                                              | 157.2 | 109.3 | 95.5  | 103.9 | 89.1  | 103.5 | 89.5  | 91    |
| 6754098   | Gusb        | 648  | 74.1  | Metabolic pathways; Lysosome; Drug metabolism - other enzymes; Glycosaminoglycan degradation; Porphyrin and chlorophyll metabolism; Pentose and glucuronate interconversions                 | 103.1 | 104.8 | 90.9  | 87.8  | 108   | 114   | 101.2 | 86.5  |
| 56605682  | Scaf1       | 1256 | 133.8 |                                                                                                                                                                                              | 105.6 | 92.9  | 94.7  | 95.6  | 107.9 | 117.3 | 98    | 105.3 |
| 254540068 | Krt18       | 423  | 47.5  |                                                                                                                                                                                              | 45.4  | 50.1  | 42.5  | 41.8  | 37.3  | 41.7  | 34.7  | 39.6  |
| 21312046  | Fam96b      | 163  | 17.7  |                                                                                                                                                                                              | 92.3  | 94.9  | 105   | 96.5  | 105.4 | 105   | 106.6 | 104   |
| 27370072  | Zc3hc1      | 481  | 52.8  |                                                                                                                                                                                              | 97.7  | 118.3 | 106.3 | 96.5  | 102.5 | 98.4  | 92.4  | 98.1  |
| 20330802  | Trf         | 697  | 76.7  | Mineral absorption; HIF-1 signaling pathway                                                                                                                                                  | 175   | 167.7 | 158.5 | 154.7 | 103.1 | 101.4 | 91.1  | 92.7  |
| 480540306 | Pex5        | 639  | 70.7  | Peroxisome                                                                                                                                                                                   | 115   | 96.6  | 96.1  | 94.5  | 108.2 | 104.1 | 104.2 | 102.6 |
| 298676450 | Carkd; Naxd | 365  | 38.9  |                                                                                                                                                                                              | 111.1 | 126.2 | 105.3 | 103.5 | 91.3  | 95.7  | 92.8  | 104.8 |
| 283046784 | Slirp       | 112  | 12.6  |                                                                                                                                                                                              | 99.6  | 103   | 86.2  | 85.1  | 108.6 | 109.2 | 118.5 | 113.5 |
| 199559777 | Ppp5c       | 499  | 56.8  | MAPK signaling pathway                                                                                                                                                                       | 110.6 | 116.3 | 80.5  | 78.7  | 101.8 | 108.1 | 116.1 | 122.2 |
| 21313478  | Comm5       | 224  | 24.5  |                                                                                                                                                                                              | 108.5 | 99    | 95.6  | 100.2 | 103.4 | 96.2  | 101.5 | 108   |
| 284005490 | Dohh        | 302  | 32.9  |                                                                                                                                                                                              | 104.2 | 102.2 | 92.3  | 98.9  | 112.8 | 123.2 | 100.1 | 97.8  |
| 21313084  | Cdyl2       | 503  | 56.1  |                                                                                                                                                                                              | 79.7  | 86.8  | 81    | 76.9  | 128.6 | 153.8 | 130.2 | 123.9 |
| 226423863 | Pold2       | 469  | 51.3  | DNA replication; Homologous recombination; Metabolic pathways; HTLV-I infection; Purine metabolism; Nucleotide excision repair; Pyrimidine metabolism; Base excision repair; Mismatch repair | 104.8 | 102.2 | 84.7  | 80.6  | 101.8 | 102.1 | 111.7 | 108   |
| 31980712  | Usp25       | 1055 | 121.3 |                                                                                                                                                                                              | 98.6  | 99.2  | 92.5  | 96.3  | 104.7 | 107.3 | 97.5  | 102.2 |
| 359465596 | Atp2c1      | 952  | 104.2 |                                                                                                                                                                                              | 103   |       | 92.3  |       | 104.3 |       | 106.5 |       |



|           |             |      |       |                                                                                                                                                                                                                                                                 |       |       |       |       |       |       |       |       |
|-----------|-------------|------|-------|-----------------------------------------------------------------------------------------------------------------------------------------------------------------------------------------------------------------------------------------------------------------|-------|-------|-------|-------|-------|-------|-------|-------|
| 29789148  | Ndufb9      | 179  | 22    | Metabolic pathways; Huntington's disease; Non-alcoholic fatty liver disease (NAFLD); Oxidative phosphorylation; Parkinson's disease; Alzheimer's disease                                                                                                        | 101.5 | 108.3 | 94.8  | 98.9  | 102.5 | 98.4  | 97.3  | 99.6  |
| 18093092  | Mthfs       | 203  | 23.2  | Metabolic pathways; One carbon pool by folate                                                                                                                                                                                                                   | 113.2 | 123.3 | 115.4 | 123.7 | 102.5 | 82.2  | 84.4  | 85.3  |
| 39930435  | Taco1       | 294  | 32.3  |                                                                                                                                                                                                                                                                 | 103.4 | 115.2 | 101.4 | 102.9 | 102.4 | 105.2 | 111.8 | 106.9 |
| 61676179  | Plcb2       | 1181 | 134.5 | Oxytocin signaling pathway; AGE-RAGE signaling pathway in diabetic complications; Wnt signaling pathway; Cholinergic synapse; Chagas disease (American trypanosomiasis); Phospholipase D signaling pathway; Retrograde endocannabinoid signaling; Pancreatic se | 119.8 | 114.9 | 109.7 | 114.4 | 91.2  | 87.4  | 98    | 79.6  |
| 21624617  | Ndufaf4     | 173  | 20.1  |                                                                                                                                                                                                                                                                 | 105.4 | 103.4 | 104.6 | 108.7 | 101.2 | 106.2 | 105.1 | 90    |
| 268837281 | Nacc1       | 514  | 56.5  |                                                                                                                                                                                                                                                                 | 87.5  | 95.2  | 78.1  | 96.3  | 113.2 | 114.4 | 113.1 | 97.7  |
| 31559983  | Cept1       | 416  | 46.4  | Metabolic pathways; Ether lipid metabolism; Glycerophospholipid metabolism                                                                                                                                                                                      | 94.5  | 89.6  | 90.1  | 96.5  | 101.4 | 101.2 | 106.1 | 104.2 |
| 33859690  | Coq9        | 313  | 35.1  |                                                                                                                                                                                                                                                                 | 116.5 | 112.4 | 102.8 | 100.3 | 99.9  | 94.1  | 97.7  | 101.9 |
| 13385492  | Ndufa6      | 131  | 15.3  | Metabolic pathways; Huntington's disease; Non-alcoholic fatty liver disease (NAFLD); Oxidative phosphorylation; Parkinson's disease; Alzheimer's disease                                                                                                        | 122.2 | 120.1 | 110.1 | 106.4 | 98.8  | 93.8  | 80.8  | 80.3  |
| 117647277 | Scaf11      | 1456 | 162   |                                                                                                                                                                                                                                                                 | 98    | 105.3 | 96.7  | 89.3  | 106.9 | 105.8 | 115.5 | 118.1 |
| 27229052  | Get4        | 327  | 36.5  |                                                                                                                                                                                                                                                                 | 92.2  | 91.5  | 98.4  | 84    | 117.1 | 116.6 | 109.4 | 113.6 |
| 45597445  | Uime1       | 727  | 81.4  |                                                                                                                                                                                                                                                                 | 109.6 | 111.7 | 116.6 | 115.4 | 85.9  | 87.5  | 98.3  | 92.8  |
| 8567394   | Psmb9       | 219  | 23.3  | Proteasome                                                                                                                                                                                                                                                      | 123.3 | 110.9 | 107.7 | 105.9 | 83.1  | 94.3  | 81.9  | 87.9  |
| 33859480  | Hsf1        | 503  | 54.9  | Legionellosis                                                                                                                                                                                                                                                   | 107.9 | 106.7 | 99.8  | 101.5 | 92.1  | 90.4  | 100.4 | 96.7  |
| 225690624 | Als2cl      | 952  | 108.2 |                                                                                                                                                                                                                                                                 | 111.4 | 110.1 | 111.3 | 103.9 | 85.6  | 90.3  | 87.6  | 93.2  |
| 30840986  | Khynyn      | 671  | 74.5  |                                                                                                                                                                                                                                                                 | 115.5 | 99.1  | 88.5  | 116.6 | 110.7 | 128.5 | 104.1 | 95.4  |
| 33563292  | Phf6        | 364  | 41.1  |                                                                                                                                                                                                                                                                 | 93.1  | 117.3 | 87.1  | 81.7  | 109.8 | 114.9 | 119.1 | 116.2 |
| 9055172   | Atp6ap1     | 463  | 51    | Rheumatoid arthritis; Metabolic pathways; Tuberculosis; Hepatitis B; Lysosome; Phagosome; Oxidative phosphorylation                                                                                                                                             | 88.5  | 86.6  | 80.2  | 83.6  | 116.9 | 117.2 | 116.9 | 118.5 |
| 20911031  | Krt5        | 580  | 61.7  |                                                                                                                                                                                                                                                                 | 78.3  |       | 103   |       | 88.5  |       | 85.2  |       |
| 28076885  | Hat1        | 416  | 49.2  | Alcoholism                                                                                                                                                                                                                                                      | 78.8  | 79.4  | 71.1  | 69.4  | 129   | 136   | 120.2 | 111.8 |
| 92091595  | Arap1       | 1441 | 161   | Endocytosis                                                                                                                                                                                                                                                     | 123   | 115.5 | 101.7 | 104.9 | 87.9  | 95.3  | 90.6  | 91.1  |
| 261824055 | Fkbp2       | 140  | 15.3  |                                                                                                                                                                                                                                                                 | 101.5 | 99.1  | 88    | 87.1  | 102.9 | 101.2 | 99.4  | 104.9 |
| 19526994  | Memol       | 297  | 33.7  |                                                                                                                                                                                                                                                                 | 93.7  | 87    | 88.2  | 85.5  | 115.8 | 113.7 | 118.2 | 125.7 |
| 21312784  | Ppil1       | 166  | 18.2  | Spliceosome                                                                                                                                                                                                                                                     | 100.4 | 99.2  | 105.7 | 106.5 | 101.5 | 101.1 | 95.6  | 90.9  |
| 126362985 | Rrp15       | 281  | 31    |                                                                                                                                                                                                                                                                 | 86.3  | 89.6  | 90.1  | 87.4  | 113.6 | 111.7 | 132.4 | 135.2 |
| 33468987  | Wdr48       | 676  | 76    | Fanconi anemia pathway                                                                                                                                                                                                                                          | 94.3  | 94.8  | 92.3  | 90.7  | 109.6 | 112.2 | 112.4 | 112.9 |
| 28827826  | Obfc1; Stn1 | 378  | 43.5  |                                                                                                                                                                                                                                                                 | 102.5 | 106.8 | 97    | 92.7  | 122   | 116.7 | 70.5  | 93.1  |
| 158749553 | Sf3a2       | 485  | 51.2  | Spliceosome                                                                                                                                                                                                                                                     | 94.5  | 95.1  | 98.1  | 92.3  | 105   | 104   | 111.1 | 110.5 |
| 67782332  | Tnrc6b      | 1810 | 191.8 |                                                                                                                                                                                                                                                                 | 151.1 | 98.8  | 94.1  | 91    | 98.1  | 95.7  | 95.1  | 108.2 |

|           |                            |      |       |                                                                                                                                                                                                                                                                  |       |       |       |       |       |       |       |       |
|-----------|----------------------------|------|-------|------------------------------------------------------------------------------------------------------------------------------------------------------------------------------------------------------------------------------------------------------------------|-------|-------|-------|-------|-------|-------|-------|-------|
| 10092590  | Mapk14                     | 360  | 41.3  | FoxO signaling pathway; Leukocyte transendothelial migration; AGE-RAGE signaling pathway in diabetic complications; Chagas disease (American trypanosomiasis); T cell receptor signaling pathway; Retrograde endocannabinoid signaling; MAPK signaling pathway   | 104.6 | 101.9 | 92.2  | 89.6  | 96.1  | 95.8  | 96.2  | 102   |
| 225543402 | Mphosph8                   | 858  | 97.4  |                                                                                                                                                                                                                                                                  | 98.2  | 98.8  | 100.7 | 102.9 | 102.1 | 99.9  | 105.3 | 100.3 |
| 51571537  | Pank2                      | 443  | 48.6  | Metabolic pathways; Pantothenate and CoA biosynthesis                                                                                                                                                                                                            | 114.4 | 121.9 | 100.1 | 92.5  | 94.3  | 88    | 98.9  | 103.1 |
| 34996507  | Synrg                      | 1138 | 122   |                                                                                                                                                                                                                                                                  | 110.6 | 114.7 | 105.7 | 109   | 88.5  | 89.7  | 115.2 | 92.2  |
| 42600571  | Dhx37                      | 1150 | 128.2 |                                                                                                                                                                                                                                                                  | 86.6  | 94    | 98.1  | 97.9  | 152.4 | 97.5  | 105.2 | 103.9 |
| 21312758  | Ppp6c                      | 305  | 35.1  |                                                                                                                                                                                                                                                                  | 93.4  | 96.4  | 102   | 105.6 | 98.6  | 96    | 104   | 103.8 |
| 27369587  | Thoc5                      | 683  | 78.7  | RNA transport                                                                                                                                                                                                                                                    | 96.9  | 97.6  | 95.5  | 93.6  | 103.7 | 109.5 | 98.5  | 94.8  |
| 83009766  | LOC637657;<br>LOC102641164 | 124  | 13.6  |                                                                                                                                                                                                                                                                  | 102.3 | 106.5 | 109.2 | 106.6 | 98.4  | 98.3  | 104   | 102.5 |
| 169881250 | Suds3                      | 332  | 38.8  |                                                                                                                                                                                                                                                                  | 113.1 | 112.2 | 97.4  | 102.4 | 92.6  | 95.3  | 105.3 | 107   |
| 22164776  | Krt79                      | 531  | 57.5  |                                                                                                                                                                                                                                                                  | 51.3  | 57.7  | 70    | 68.9  | 279.1 | 266.7 | 58.5  | 63.5  |
| 170172520 | Dbt                        | 482  | 53.2  | Valine, leucine and isoleucine degradation; Metabolic pathways; Propanoate metabolism                                                                                                                                                                            | 100.5 | 104.3 | 101   | 100.5 | 97.6  | 101.6 | 84.3  | 70.7  |
| 125628650 | Ccdc47                     | 483  | 55.8  |                                                                                                                                                                                                                                                                  | 87.6  | 87.2  | 83.9  | 82.8  | 104.6 | 103.3 | 109.9 | 112.6 |
| 6680922   | Cetn3                      | 167  | 19.5  |                                                                                                                                                                                                                                                                  | 101   | 88.6  | 94.4  | 102.4 | 101.6 | 121   | 116.4 | 116.1 |
| 225690587 | Lrrc1                      | 524  | 59.4  |                                                                                                                                                                                                                                                                  |       | 95.5  |       | 92.5  |       | 98.5  |       | 106.9 |
| 6677709   | Rela                       | 549  | 60.2  | Acute myeloid leukemia; AGE-RAGE signaling pathway in diabetic complications; Herpes simplex infection; Chagas disease (American trypanosomiasis); T cell receptor signaling pathway; MAPK signaling pathway; Ras signaling pathway; Prolactin signaling pathway | 91.6  | 99.1  | 97.7  | 96.9  | 105.7 | 97.5  | 109.2 | 105.8 |
| 161016797 | Ncapd3                     | 1506 | 169.3 |                                                                                                                                                                                                                                                                  | 83    | 84.2  | 84.1  | 72.9  | 118.1 | 140.3 | 110.2 | 123   |
| 57634523  | Rcor3                      | 395  | 44.4  |                                                                                                                                                                                                                                                                  | 106.7 | 112   | 86.5  | 86.3  | 98.6  | 106.7 | 81.8  | 77.8  |
| 157909778 | Kri1                       | 705  | 82.2  |                                                                                                                                                                                                                                                                  | 113.1 | 94.6  | 101.1 | 107.9 | 102.2 | 97.2  | 103.1 | 103.5 |
| 270483798 | Nat2                       | 290  | 33.7  | Caffeine metabolism; Metabolic pathways; Drug metabolism - other enzymes; Chemical carcinogenesis                                                                                                                                                                | 109   | 111   | 107.8 | 113.8 | 94.4  | 95.2  | 92.3  | 96.1  |
| 257196177 | Znf512b;<br>Zfp512b        | 869  | 95.3  |                                                                                                                                                                                                                                                                  | 93.9  | 109.1 | 89.3  | 109.2 | 101   | 93.9  | 118.5 | 92.8  |
| 13385392  | Napa                       | 295  | 33.2  | Synaptic vesicle cycle                                                                                                                                                                                                                                           | 110.3 | 107.8 | 102.5 | 103.2 | 93.5  | 98.2  | 101.6 | 96.2  |
| 124486935 | Kdm3b                      | 1762 | 191.3 |                                                                                                                                                                                                                                                                  | 104.4 | 107   | 100.2 | 95.2  | 100   | 107.2 | 104.4 | 101.8 |
| 227497222 | Dut                        | 200  | 21.2  | Metabolic pathways; Pyrimidine metabolism                                                                                                                                                                                                                        | 49    | 39.9  | 52.8  | 39    | 171.2 | 166   | 177.4 | 196.2 |
| 359465542 | Ankle2                     | 964  | 106.1 |                                                                                                                                                                                                                                                                  | 92.2  | 95.2  | 92.6  | 101.9 | 113.6 | 118   | 120.1 | 116.9 |
| 6679034   | Nedd8                      | 81   | 9     |                                                                                                                                                                                                                                                                  | 111.7 | 117.1 | 109.8 | 110.3 | 84    | 83.2  | 107.6 | 108.7 |
| 189458849 | Cpm                        | 443  | 50.5  |                                                                                                                                                                                                                                                                  | 114.1 | 106.1 | 108.5 | 107.8 | 91.7  | 96.3  | 94.2  | 95.3  |
| 224922832 | Fubp3                      | 575  | 61.9  |                                                                                                                                                                                                                                                                  | 91.5  | 93.8  | 91.6  | 85    | 107.6 | 107.4 | 106.3 | 98.6  |
| 33563313  | Arhgap18                   | 663  | 74.9  |                                                                                                                                                                                                                                                                  | 105.8 | 112.9 | 109.5 | 113.6 | 98.6  | 93.1  | 106.2 | 96.1  |

|           |                  |      |       |                                                                                                                                                                                                                                                                |       |       |       |       |       |       |       |       |
|-----------|------------------|------|-------|----------------------------------------------------------------------------------------------------------------------------------------------------------------------------------------------------------------------------------------------------------------|-------|-------|-------|-------|-------|-------|-------|-------|
| 157785665 | Dtymk            | 212  | 23.9  | Metabolic pathways; Pyrimidine metabolism                                                                                                                                                                                                                      | 87    | 87.1  | 85.8  | 88.2  | 120.7 | 115.4 | 116.2 | 110.3 |
| 13384676  | Dtd1             | 209  | 23.4  |                                                                                                                                                                                                                                                                | 106.1 | 105.7 | 89.3  | 88.6  | 98.1  | 91.7  | 98.9  | 99.5  |
| 46877109  | Galnt2           | 570  | 64.5  | Metabolic pathways; Mucin type O-glycan biosynthesis                                                                                                                                                                                                           | 86.2  | 93.3  | 92.8  | 94.1  | 108.5 | 109.4 | 112   | 107.9 |
| 84871981  | Wbp4             | 376  | 42.1  |                                                                                                                                                                                                                                                                | 91.5  | 104.9 | 93.4  | 98.7  | 93.6  | 85    | 117.4 | 105.3 |
| 58037369  | Gle1             | 699  | 79.5  |                                                                                                                                                                                                                                                                | 103.3 | 99.2  | 97.7  | 95.3  | 117.8 | 110.8 | 107.8 | 95.4  |
| 119508437 | Mrpl4            | 294  | 33.1  | Ribosome                                                                                                                                                                                                                                                       | 84    | 87.3  | 79.7  | 94.1  | 105.5 | 108.5 | 100.6 | 97.6  |
| 227330586 | Mtor             | 2549 | 288.6 | ERBB signaling pathway; Acute myeloid leukemia; mTOR signaling pathway; Phospholipase D signaling pathway; Type II diabetes mellitus; MicroRNAs in cancer; Jak-STAT signaling pathway; Insulin signaling pathway; Breast cancer; Insulin resistance; Longevity | 108.8 | 103   | 91.6  | 98.5  | 105   | 104.5 | 101.4 | 102.7 |
| 29789447  | Pigk             | 442  | 49.8  |                                                                                                                                                                                                                                                                | 103.2 | 97.4  | 85.3  | 87.6  | 126.8 | 119.4 | 81.1  | 85    |
| 304434667 | Phc2             | 850  | 89.7  |                                                                                                                                                                                                                                                                | 81.6  | 82.5  | 79.9  | 84.7  | 109.6 | 115.6 | 129.2 | 123.3 |
| 113199755 | Armc6            | 468  | 50.7  |                                                                                                                                                                                                                                                                | 98.4  | 102.2 | 92.8  | 92.1  | 97.9  | 96    | 106.1 | 106.5 |
| 124301212 | Gabpb2           | 414  | 45.6  |                                                                                                                                                                                                                                                                | 100.1 | 109.3 | 97.2  | 100.2 | 95.1  | 92.2  | 101.7 | 97.6  |
| 31543307  | Nab1             | 486  | 54    |                                                                                                                                                                                                                                                                | 96    | 100.9 | 95.7  | 86.7  | 107.6 | 101.9 | 85.3  | 88.5  |
| 9790141   | Arpc3            | 178  | 20.5  | Endocytosis; Regulation of actin cytoskeleton; Salmonella infection; Fc gamma R-mediated phagocytosis; Bacterial invasion of epithelial cells                                                                                                                  | 111   | 113.7 | 100.7 | 99.1  | 85.3  | 85.5  | 95.1  | 94.1  |
| 124358934 | Larp4            | 719  | 79.7  |                                                                                                                                                                                                                                                                | 65.2  | 78.3  | 59.3  | 73.8  | 157.9 | 130.5 | 149.9 | 137.7 |
| 114158699 | Rasa2            | 847  | 96.3  | MAPK signaling pathway; Ras signaling pathway; Viral carcinogenesis                                                                                                                                                                                            | 97.1  | 84.9  | 97.3  | 90.8  | 114.4 | 104.3 | 105.7 | 107.1 |
| 227430333 | Ints8            | 995  | 113.3 |                                                                                                                                                                                                                                                                | 91.5  | 96.9  | 98.5  | 100.6 | 108.2 | 105.1 | 100.9 | 80.7  |
| 12963595  | Ndnl2;<br>Nsmce3 | 279  | 31.4  |                                                                                                                                                                                                                                                                | 96.4  |       | 96.2  |       | 110.1 |       | 110   |       |
| 126513130 | Cd6              | 665  | 72.2  | Cell adhesion molecules (CAMs)                                                                                                                                                                                                                                 | 92.5  | 101.5 | 99.5  | 101.7 | 101.4 | 96.8  | 109.5 | 101.2 |
| 251823843 | Ccdc90b          | 256  | 29.6  |                                                                                                                                                                                                                                                                | 109.3 | 106.2 | 105   | 106.1 | 102.8 | 105   | 95.3  | 98.4  |
| 254553392 | Zfp512           | 562  | 63.9  |                                                                                                                                                                                                                                                                | 109.7 | 101.7 | 119.9 | 115.6 | 92.8  | 92    | 91.7  | 94.9  |
| 120431736 | Brdt             | 956  | 107.2 |                                                                                                                                                                                                                                                                | 89.8  | 95.6  | 96.5  | 109.2 | 93.8  | 93.8  | 89.3  | 86.4  |
| 31559970  | Tmem214          | 687  | 76.4  |                                                                                                                                                                                                                                                                | 93.6  | 94.4  | 91.8  | 90.3  | 110   | 111.5 | 119.4 | 117.3 |
| 6678760   | Lypla1           | 230  | 24.7  | Glycerophospholipid metabolism; Choline metabolism in cancer                                                                                                                                                                                                   | 116.9 | 109.7 | 112.2 | 128.8 | 78.4  | 83    | 96.9  | 87    |
| 31541898  | Ipo11            | 975  | 112.3 |                                                                                                                                                                                                                                                                | 90.1  | 91.6  | 75    | 85.5  | 108.8 | 109   | 130.5 | 120.4 |
| 62122946  | Ppp1r14b         | 147  | 15.9  |                                                                                                                                                                                                                                                                |       |       |       |       |       |       |       |       |
| 163965368 | Aim1;<br>Crybg1  | 1691 | 184.6 |                                                                                                                                                                                                                                                                | 102.3 | 107.6 | 100.1 | 100.2 | 109   | 103.2 | 100.1 | 102.8 |
| 163954953 | Arih1            | 555  | 64    |                                                                                                                                                                                                                                                                | 102.9 | 85.5  | 93.2  | 86.8  | 97.2  | 95    | 99.7  | 137.6 |
| 188497644 | Noc3l            | 807  | 93.2  |                                                                                                                                                                                                                                                                | 55.8  | 79.3  | 57.6  | 74    | 101.9 | 105.8 | 174.2 | 148   |
| 31981819  | Ctsw             | 371  | 42.1  | Lysosome; Apoptosis                                                                                                                                                                                                                                            | 117.6 | 129.4 | 105.1 | 104.8 | 97.5  | 105.4 | 79.2  | 76.8  |
| 66730553  | Nufip2           | 692  | 75.6  |                                                                                                                                                                                                                                                                | 90    | 85.5  | 70.7  | 96.6  | 108.9 | 124.2 | 128   | 115.2 |
| 76880489  | Rabgap1          | 1064 | 120.7 |                                                                                                                                                                                                                                                                | 88.1  | 111.2 | 90.4  | 89.8  | 105.4 | 102.4 | 116.5 | 112.7 |

|           |              |      |       |                                                                                                                                                                                                                                                                     |       |       |       |       |       |       |       |       |
|-----------|--------------|------|-------|---------------------------------------------------------------------------------------------------------------------------------------------------------------------------------------------------------------------------------------------------------------------|-------|-------|-------|-------|-------|-------|-------|-------|
| 19111164  | Sumo2        | 95   | 10.9  | RNA transport                                                                                                                                                                                                                                                       | 120.7 |       | 127.7 |       | 70.2  |       | 82    |       |
| 68448515  | Cdc16        | 620  | 71.4  | Progesterone-mediated oocyte maturation; Ubiquitin mediated proteolysis; HTLV-I infection; Oocyte meiosis; Metabolic pathways; Huntington's disease; Non-alcoholic fatty liver disease (NAFLD); Oxidative phosphorylation; Parkinson's disease; Alzheimer's disease | 95.1  | 95    | 97.1  | 95.6  | 113.9 | 111.2 | 108.9 | 106.3 |
| 406855425 | Ndufs8       | 212  | 24    | Endocytosis; Primary immunodeficiency; Jak-STAT signaling pathway; HTLV-I infection; Inflammatory bowel disease (IBD); PI3K-Akt signaling pathway; Th1 and Th2 cell differentiation; Cytokine-cytokine receptor interaction; Measles                                | 109.2 | 116.8 | 98.9  | 99.2  | 96.8  | 98.1  | 100.9 | 102.8 |
| 7305181   | Il2rg        | 369  | 42.2  | Wnt signaling pathway; Breast cancer; Hedgehog signaling pathway                                                                                                                                                                                                    | 77.9  | 79.2  | 89.4  | 91.4  | 117.1 | 116.5 | 119.7 | 119.4 |
| 160948594 | Gpatch4      | 415  | 46.5  |                                                                                                                                                                                                                                                                     | 110.1 | 235.1 | 92.7  | 82.4  | 118.4 | 122.6 | 102   | 68.7  |
| 22267448  | Tmem33       | 247  | 28    |                                                                                                                                                                                                                                                                     | 96.8  | 96.2  | 85.3  | 102.7 | 103.4 | 116.6 | 108.6 | 100.7 |
| 50511310  | Carm1        | 608  | 65.8  | Endocrine resistance                                                                                                                                                                                                                                                | 91.9  | 82.7  | 88    | 86.9  | 114.5 | 109.4 | 105.6 | 108.4 |
| 22003884  | Irf2bpl      | 775  | 80.5  |                                                                                                                                                                                                                                                                     | 115.1 | 111.8 | 112   | 109.5 | 80.2  | 95.2  | 85.7  | 89.2  |
| 21746159  | Ppil3        | 161  | 18.1  |                                                                                                                                                                                                                                                                     | 116.2 | 109   | 97.4  | 98.6  | 108.7 | 113.5 | 94.7  | 96.7  |
| 22165382  | Csnk1a1      | 325  | 37.5  |                                                                                                                                                                                                                                                                     | 89.7  | 94.1  | 87.7  | 89.2  | 108.3 | 108.1 | 110.6 | 107.1 |
| 407263120 | Gm12508      | 263  | 28.5  |                                                                                                                                                                                                                                                                     | 92.6  | 100.2 | 90.9  | 94.9  | 102.2 | 104.4 | 124.1 | 115.4 |
| 14780884  | Poldip2      | 368  | 41.8  |                                                                                                                                                                                                                                                                     | 86.2  | 93.2  | 80.9  | 90.7  | 104.4 | 102.2 | 118.5 | 109   |
| 299890784 | Dnajb11      | 358  | 40.5  | Protein processing in endoplasmic reticulum                                                                                                                                                                                                                         | 82.7  | 82.5  | 78.1  | 82.3  | 122.7 | 119.7 | 118.2 | 117.7 |
| 295293209 | Pfkfb3       | 555  | 63.6  |                                                                                                                                                                                                                                                                     | 102.1 | 107.7 | 89    | 105.5 | 111.9 | 93.3  | 104   | 102.3 |
| 124487149 | Wdr70        | 657  | 73    |                                                                                                                                                                                                                                                                     | 94.9  | 105.4 | 98.6  | 96.6  | 103.8 | 92.6  | 98.4  | 84    |
| 30520239  | Nceh1        | 408  | 45.7  | Bile secretion                                                                                                                                                                                                                                                      | 120.4 | 114.4 | 103.4 | 104.4 | 91.8  | 96.8  | 68    | 67.8  |
| 39652626  | Bpnt1        | 308  | 33.2  | Metabolic pathways; Sulfur metabolism                                                                                                                                                                                                                               | 127   | 106.7 | 128.7 | 90.2  | 87.8  | 227.7 | 73    | 60.5  |
| 224967104 | Srsf6        | 339  | 39    | Herpes simplex infection; Spliceosome                                                                                                                                                                                                                               | 79.4  | 92    | 88.3  | 92.6  | 107.1 | 104.1 | 123.3 | 109.7 |
| 157817372 | Mbd1         | 588  | 64.1  |                                                                                                                                                                                                                                                                     | 101.4 | 99.3  | 99.5  | 83.4  | 90.1  | 77.4  | 143.8 | 181.7 |
| 18017602  | Sh3bgrl3     | 93   | 10.5  |                                                                                                                                                                                                                                                                     | 104.3 | 91.6  | 158.4 | 178.7 | 58.1  | 51.4  | 75.4  | 72.3  |
| 210147499 | Ccdc9        | 589  | 65.9  |                                                                                                                                                                                                                                                                     | 113.6 | 100.7 | 106.5 | 98.9  | 93.7  | 103.5 | 112.9 | 110.7 |
| 256773241 | Tax1bp1      | 814  | 93.6  |                                                                                                                                                                                                                                                                     | 89.3  | 87.8  | 82.8  | 88    | 108.4 | 102.5 | 113.4 | 108.1 |
| 21312028  | Mrpl14       | 145  | 15.9  | Ribosome                                                                                                                                                                                                                                                            | 103.1 | 110.9 | 92.3  | 95.4  | 103.9 | 101.7 | 120.2 | 116.3 |
| 31543847  | Tceb3; Eloa  | 773  | 87.1  |                                                                                                                                                                                                                                                                     | 113   | 103.6 | 103.6 | 93.7  | 90.7  | 96.1  | 88.6  | 96.4  |
| 111154067 | Tmem165      | 323  | 34.8  |                                                                                                                                                                                                                                                                     | 77.4  | 84    | 83.4  | 82.8  | 123.4 | 114.1 | 124.7 | 118.2 |
| 19526848  | Marc2; Mosc2 | 338  | 38.2  |                                                                                                                                                                                                                                                                     | 104.2 | 110.2 | 108.7 | 105.3 | 85.2  | 88.4  | 90.9  | 87.4  |
| 356582264 | Map4k4       | 1288 | 146.6 |                                                                                                                                                                                                                                                                     | 89.6  |       | 92.8  |       | 136.4 |       | 102.2 |       |
| 19527196  | Imp3         | 184  | 21.8  | Ribosome biogenesis in eukaryotes                                                                                                                                                                                                                                   | 98.4  | 94.7  | 95    | 91.7  | 117.7 | 113.5 | 108.7 | 109.6 |
| 253314540 | Mapre2       | 326  | 36.9  |                                                                                                                                                                                                                                                                     | 95.5  | 81.5  | 93.1  | 79    | 107   | 125.6 | 96.7  | 65.9  |
| 9624979   | Ensa         | 121  | 13.3  |                                                                                                                                                                                                                                                                     | 100.3 | 110.6 | 109.1 | 111.5 | 92.6  | 82.8  | 98    | 100.3 |
| 68448542  | Ccdc93       | 629  | 72.6  |                                                                                                                                                                                                                                                                     | 102.1 | 95.6  | 98    | 97.5  | 96.3  | 97.9  | 107.7 | 114.6 |

|           |                              |      |       |                                                                                                                                                                                                                                                                 |       |       |       |       |       |       |       |       |
|-----------|------------------------------|------|-------|-----------------------------------------------------------------------------------------------------------------------------------------------------------------------------------------------------------------------------------------------------------------|-------|-------|-------|-------|-------|-------|-------|-------|
| 31560267  | Map2k2                       | 401  | 44.4  | Oxytocin signaling pathway; ErbB signaling pathway; FoxO signaling pathway; Acute myeloid leukemia; mTOR signaling pathway; T cell receptor signaling pathway; Phospholipase D signaling pathway; Regulation of actin cytoskeleton; MAPK signaling pathway; Mic | 112.5 | 95.2  | 100.2 | 107   | 95.9  | 100.5 | 87.1  | 88.4  |
| 86262144  | Rbm4;<br>Rbm14               | 361  | 40    |                                                                                                                                                                                                                                                                 | 95.2  | 95.4  | 94.6  | 93.7  | 117.9 | 108.2 | 113.3 | 109.5 |
| 60687506  | Aldoc                        | 363  | 39.4  | Metabolic pathways; Biosynthesis of amino acids; Glycolysis / Gluconeogenesis; Pentose phosphate pathway; Carbon metabolism; Fructose and mannose metabolism                                                                                                    | 118.3 | 117.2 | 93.4  | 96.7  | 100.9 | 98.6  | 97.7  | 93.4  |
| 94371608  | Gm12372;<br>LOC1052<br>47169 | 301  | 33.3  |                                                                                                                                                                                                                                                                 | 104.1 | 93.8  | 95.7  | 103   | 104.8 | 129.9 | 100.4 | 95.8  |
| 244790049 | Sqrd1,<br>Ssqn               | 450  | 50.3  | Sulfur metabolism                                                                                                                                                                                                                                               | 112.9 | 131.6 | 121.3 | 144.8 | 89.7  | 75.7  | 108.8 | 80.7  |
| 124487339 | Ganc                         | 913  | 103.6 | Metabolic pathways; Starch and sucrose metabolism; Galactose metabolism                                                                                                                                                                                         | 128.5 |       | 160.9 |       | 74.6  |       | 75.9  |       |
| 125630636 | Tbc1d8b                      | 1114 | 127.8 |                                                                                                                                                                                                                                                                 | 91.4  | 89.7  | 114.2 | 111.8 | 110.1 | 102.9 | 97.8  | 96.8  |
| 16716407  | Clec2d                       | 207  | 23.6  |                                                                                                                                                                                                                                                                 | 110.7 | 109   | 98.9  | 104.1 | 95.5  | 95.4  | 78.7  | 76.6  |
| 82885753  | Gm13981                      | 148  | 16.6  |                                                                                                                                                                                                                                                                 | 86.4  | 86    | 97.3  | 97.9  | 106.2 | 104.5 | 116.2 | 117.1 |
| 13385752  | Mrpl49                       | 166  | 19.1  |                                                                                                                                                                                                                                                                 | 91.4  | 92.5  | 87    | 89    | 112.5 | 114.9 | 119.6 | 122.9 |
| 7710096   | Sntb1                        | 537  | 58    |                                                                                                                                                                                                                                                                 | 111.5 | 107.2 | 103.9 | 91.3  | 95.2  | 92.4  | 83.7  | 99.7  |
| 264681516 | Spag7                        | 227  | 25.9  |                                                                                                                                                                                                                                                                 | 114.8 | 109.5 | 109.3 | 105.2 | 92.3  | 91.9  | 105   | 108.4 |
| 29789341  | Ube3c                        | 1083 | 123.9 | Ubiquitin mediated proteolysis                                                                                                                                                                                                                                  | 94.6  | 94    | 93.5  | 87.9  | 104.1 | 108.8 | 112.9 | 111.5 |
| 237681154 | Zfp281                       | 893  | 96.6  |                                                                                                                                                                                                                                                                 | 90.4  | 83.6  | 74.3  | 74.6  | 108.3 | 113.2 | 140.3 | 133.9 |
| 67906168  | Nr2c2                        | 596  | 65.2  |                                                                                                                                                                                                                                                                 | 115   | 112.2 | 104.6 | 103.7 | 95    | 89.2  | 94    | 102.4 |
| 365733608 | Otud4                        | 1107 | 123   |                                                                                                                                                                                                                                                                 | 103.1 | 134.7 | 101.4 | 94.5  | 101.9 | 98.1  | 108.4 | 102.1 |
| 188219604 | Polr2j                       | 117  | 13.3  | RNA polymerase; Epstein-Barr virus infection; Metabolic pathways; Purine metabolism; Huntington's disease; Pyrimidine metabolism                                                                                                                                | 102.8 | 101.1 | 126.1 | 117.3 | 125.1 | 112.1 | 77.2  | 78.2  |
| 61098173  | Cep120                       | 988  | 112.5 |                                                                                                                                                                                                                                                                 | 98.5  | 106.9 | 97.3  | 92.9  | 95.2  | 99.1  | 104.5 | 102.7 |
| 117956381 | Psme4                        | 1843 | 211.1 | Proteasome                                                                                                                                                                                                                                                      | 93.9  | 86.7  | 90    | 88.8  | 101.3 | 103   | 109.2 | 118.6 |
| 6679821   | Fnta                         | 377  | 44    | Terpenoid backbone biosynthesis                                                                                                                                                                                                                                 | 94    | 100   | 83.8  | 93.7  | 102.2 | 107   | 110.9 | 111   |
| 39812173  | Slu7                         | 585  | 68    | Spliceosome                                                                                                                                                                                                                                                     | 100.2 | 94.6  | 99.6  | 88.7  | 103.4 | 89.5  | 108.7 | 96.5  |
| 30424792  | Hsd1l                        | 330  | 36.8  |                                                                                                                                                                                                                                                                 | 106.6 | 111.5 | 103.3 | 104.1 | 87.5  | 86.4  | 89.8  | 91.5  |
| 27370488  | Slc28a2                      | 660  | 72.9  |                                                                                                                                                                                                                                                                 | 112.3 | 115.4 | 79.6  | 81    | 119.4 | 123.9 | 89.5  | 90.3  |
| 405778342 | Arrb2                        | 421  | 47.4  |                                                                                                                                                                                                                                                                 | 96.4  | 99.3  | 111.5 | 114.5 | 105.8 | 99    | 90.1  | 80.4  |
| 254540114 | Fam172a                      | 417  | 48    |                                                                                                                                                                                                                                                                 | 101.4 | 98.5  | 100.1 | 102.8 | 100.1 | 102   | 105.7 | 109.3 |
| 6755668   | Stam                         | 548  | 59.7  | Endocytosis; Jak-STAT signaling pathway                                                                                                                                                                                                                         | 85.3  | 96.6  | 79.3  | 97.1  | 116.5 | 102.2 | 116.5 | 107.5 |
| 134031957 | Bccip                        | 316  | 35.9  |                                                                                                                                                                                                                                                                 | 115   | 93.8  | 100.6 | 93.1  | 112.4 | 118.2 | 106.2 | 106   |
| 139948568 | Snap29                       | 260  | 29.6  | SNARE interactions in vesicular transport                                                                                                                                                                                                                       | 132.8 | 115.7 | 93.2  | 105.3 | 93.2  | 95.8  | 95.1  | 85.5  |
| 31982764  | Slc7a5                       | 512  | 55.8  | mTOR signaling pathway; Central carbon metabolism in cancer                                                                                                                                                                                                     | 68.6  | 68.7  | 63.4  | 60.3  | 123   | 142.3 | 137.3 | 137.4 |

|           |          |      |       |                                                                                                                                                                                                                                                                |       |       |       |       |       |       |       |       |
|-----------|----------|------|-------|----------------------------------------------------------------------------------------------------------------------------------------------------------------------------------------------------------------------------------------------------------------|-------|-------|-------|-------|-------|-------|-------|-------|
| 30794474  | Mrps7    | 242  | 28    | Ribosome                                                                                                                                                                                                                                                       | 88.7  | 101.6 | 96.6  | 92.8  | 110.9 | 105.5 | 122.5 | 115.1 |
| 111120337 | Tbc1d17  | 645  | 72.8  |                                                                                                                                                                                                                                                                | 99.4  | 96.7  | 96    | 96.1  | 111.2 | 114.7 | 104   | 88.4  |
| 71067102  | Akr1b10  | 316  | 35.8  | Metabolic pathways; Glycerolipid metabolism; Fructose and mannose metabolism; Pentose and glucuronate interconversions: Galactose metabolism                                                                                                                   | 77.4  | 73.6  | 72.1  | 63.4  | 56.8  | 53.4  | 59.5  | 54.4  |
| 6755596   | Snrpe    | 159  | 17.4  | Spliceosome                                                                                                                                                                                                                                                    | 104.8 | 111.9 | 101.9 | 98.8  | 90.7  | 86.8  | 103.8 | 101.7 |
| 295317363 | Taf6l    | 623  | 67.9  | Herpes simplex infection; Basal transcription factors                                                                                                                                                                                                          | 98.1  | 99.7  | 86.2  | 97    | 98.6  | 101.5 | 101.2 | 108.3 |
| 6755656   | Sptlc2   | 560  | 62.9  | Metabolic pathways; Sphingolipid signaling pathway; Sphingolipid metabolism                                                                                                                                                                                    | 103.9 | 101.4 | 97.5  | 100.4 | 97.6  | 99.4  | 101.1 | 96.3  |
| 10181184  | Atp5j2   | 88   | 10.3  | Metabolic pathways; Oxidative phosphorylation                                                                                                                                                                                                                  | 89.7  | 96.1  | 100   | 99.3  | 117.7 | 110.8 | 95.3  | 93    |
| 7304929   | Trappc3  | 180  | 20.3  |                                                                                                                                                                                                                                                                | 104.4 | 102.6 | 94.7  | 96    | 99.4  | 95.5  | 96.3  | 97.1  |
| 42558273  | Pik3ip1  | 264  | 28.5  |                                                                                                                                                                                                                                                                | 107.2 | 108.5 | 108.4 | 108   | 73    | 79.5  | 86.4  | 70.9  |
| 260436918 | Gtf3c4   | 817  | 91.6  |                                                                                                                                                                                                                                                                | 105.7 | 106.3 | 110.5 | 115.4 | 93.8  | 92.6  | 93.6  | 94.9  |
| 6754612   | Mafk     | 156  | 17.5  |                                                                                                                                                                                                                                                                | 84.1  |       | 104.6 |       | 99.4  |       | 104.9 |       |
| 154689581 | Smyd5    | 416  | 47.1  |                                                                                                                                                                                                                                                                | 90.1  | 88    | 86.6  | 86.4  | 117.3 | 119.2 | 120   | 120.1 |
| 13386102  | Rnaseh2c | 166  | 17.8  | DNA replication                                                                                                                                                                                                                                                | 107.7 | 112.7 | 98.3  | 93.2  | 99.2  | 98.1  | 104.6 | 106.7 |
| 255918147 | Ndr3     | 388  | 43    |                                                                                                                                                                                                                                                                | 99.3  | 100.3 | 105.7 | 90.2  | 95.9  | 94.3  | 90.8  | 94.9  |
| 40254503  | Prpf18   | 342  | 39.9  | Spliceosome                                                                                                                                                                                                                                                    | 93.7  | 107.4 | 94.6  | 93.9  | 105.5 | 112.1 | 104.3 | 70.1  |
| 257153359 | Tsr2     | 195  | 21.4  |                                                                                                                                                                                                                                                                | 105.6 | 110.3 | 106.6 | 107.9 | 92.2  | 95.7  | 100.4 | 100.4 |
| 154350234 | Trim34a  | 485  | 55.9  |                                                                                                                                                                                                                                                                | 110.5 | 101.3 | 69.6  | 70.2  | 93.4  | 89.7  | 97.7  | 107.5 |
| 61742812  | Chd6     | 2711 | 305.2 |                                                                                                                                                                                                                                                                | 91.5  |       | 83.1  |       | 131.9 |       | 112.8 |       |
| 6754510   | Lat      | 242  | 26    | T cell receptor signaling pathway; Ras signaling pathway; Fc gamma R-mediated phagocytosis; Rap1 signaling pathway; NF-kappa B signaling pathway; Natural killer cell mediated cytotoxicity; Fc epsilon RI signaling pathway; Th1 and Th2 cell differentiation | 99.9  | 99.8  | 103.3 | 109.5 | 89.3  | 90.2  | 92.7  | 94.8  |
| 264681550 | Wdr26    | 641  | 70.5  |                                                                                                                                                                                                                                                                | 89.3  | 98.4  | 78.7  | 97.4  | 107.8 | 106.4 | 109.8 | 98.8  |
| 23346617  | Lars2    | 902  | 101.4 | Aminoacyl-tRNA biosynthesis                                                                                                                                                                                                                                    | 95.7  | 97.8  | 85.9  | 86.5  | 117.7 | 120.5 | 101   | 103.4 |
| 118601013 | Aprt     | 180  | 19.7  | Metabolic pathways; Purine metabolism                                                                                                                                                                                                                          | 103.9 | 101   | 101.6 | 114.9 | 91.9  | 94.9  | 103.5 | 100.5 |
| 356995862 | Epn1     | 575  | 60.2  | Endocytosis                                                                                                                                                                                                                                                    | 106   | 127.1 | 92.6  | 112.2 | 92.6  | 88.1  | 102.1 | 107   |
| 217272818 | Vipas39  | 491  | 56.6  |                                                                                                                                                                                                                                                                | 101.5 | 102.8 | 104.2 | 103.8 | 91.8  | 95.6  | 99.5  | 94.4  |
| 298676498 | Magt1    | 368  | 41.6  |                                                                                                                                                                                                                                                                | 100   | 120.3 | 93.2  | 80.6  | 112.5 | 139.2 | 103.9 | 81.4  |
| 29789321  | Pold3    | 461  | 50.7  | DNA replication; Homologous recombination; Metabolic pathways; HTLV-I infection; Purine metabolism; Nucleotide excision repair; Pyrimidine metabolism; Base excision repair: Mismatch repair                                                                   | 99    | 100.6 | 100.7 | 88    | 104.4 | 104.7 | 108.4 | 114.3 |
| 13385626  | Med4     | 270  | 29.8  | Thyroid hormone signaling pathway                                                                                                                                                                                                                              | 105.2 | 95.6  | 81.3  | 79    | 114.3 | 114.9 | 118.6 | 120.3 |
| 21746142  | Zbtb8os  | 167  | 19.6  |                                                                                                                                                                                                                                                                | 112.6 | 112.9 | 111.7 | 109.6 | 78.5  | 85.7  | 100.4 | 102.7 |
| 21313122  | Fam103a1 | 119  | 14.5  |                                                                                                                                                                                                                                                                | 121.4 | 123   | 108.4 | 105.8 | 80.3  | 80.6  | 94.9  | 95.3  |

|           |                            |      |       |                                                                                                                                                                                                                                                                                                                                                                                                                                                                                |       |       |       |       |       |       |       |       |
|-----------|----------------------------|------|-------|--------------------------------------------------------------------------------------------------------------------------------------------------------------------------------------------------------------------------------------------------------------------------------------------------------------------------------------------------------------------------------------------------------------------------------------------------------------------------------|-------|-------|-------|-------|-------|-------|-------|-------|
| 67514549  | Hexa                       | 528  | 60.6  | Glycosphingolipid biosynthesis - globo and isoglobo series; Metabolic pathways; Lysosome; Amino sugar and nucleotide sugar metabolism; Glycosphingolipid biosynthesis - ganglio series; Glycosaminoglycan degradation; Other glycan degradation                                                                                                                                                                                                                                | 119.8 | 130.1 | 116.4 | 117.4 | 91.5  | 87.4  | 91.4  | 87.7  |
| 33859596  | P4ha1                      | 534  | 60.9  | Arginine and proline metabolism; Metabolic pathways                                                                                                                                                                                                                                                                                                                                                                                                                            | 82.2  | 56.1  | 88.8  | 69.9  | 131.8 | 164.6 | 120   | 145.6 |
| 111955338 | Ly9                        | 654  | 73.1  |                                                                                                                                                                                                                                                                                                                                                                                                                                                                                | 82.9  | 84.5  | 77.9  | 79    | 110.6 | 119.1 | 120.3 | 121.8 |
| 27369487  | Limd2                      | 128  | 14.2  |                                                                                                                                                                                                                                                                                                                                                                                                                                                                                | 117   | 126.1 | 109.2 | 108.3 | 89.2  | 79.7  | 91.9  | 88.3  |
| 168480106 | Zfr                        | 1074 | 116.8 |                                                                                                                                                                                                                                                                                                                                                                                                                                                                                | 104.6 | 110.9 | 92.3  | 103.7 | 102.9 | 97.2  | 98.9  | 99.2  |
| 21539599  | Uqcrh                      | 89   | 10.4  | Metabolic pathways; Huntington's disease; Non-alcoholic fatty liver disease (NAFLD); Oxidative phosphorylation; Parkinson's disease; Alzheimer's disease; Cardiac muscle contraction                                                                                                                                                                                                                                                                                           | 110   | 109.6 | 102.2 | 108   | 101.5 | 93.8  | 114.5 | 108.7 |
| 13384768  | Ufc1                       | 167  | 19.5  |                                                                                                                                                                                                                                                                                                                                                                                                                                                                                | 111.4 | 102.7 | 105.5 | 105.2 | 80    | 82.3  | 102.1 | 105.5 |
| 87044901  | Tbcc                       | 341  | 38.1  |                                                                                                                                                                                                                                                                                                                                                                                                                                                                                | 121.8 | 126.3 | 104.6 | 112.5 | 86.7  | 96.9  | 94.8  | 92.9  |
| 6681071   | Cstb                       | 98   | 11    |                                                                                                                                                                                                                                                                                                                                                                                                                                                                                | 114.5 | 114.3 | 113.7 | 117.8 | 82.4  | 83.7  | 82.1  | 79.9  |
| 125991228 | Gpkow                      | 488  | 53.8  |                                                                                                                                                                                                                                                                                                                                                                                                                                                                                | 97.7  | 106.6 | 103.8 | 102.1 | 98.5  | 94    | 105.3 | 98.4  |
| 28201978  | Pdhx                       | 501  | 54    | Metabolic pathways                                                                                                                                                                                                                                                                                                                                                                                                                                                             | 101.9 | 98.8  | 104.1 | 110.8 | 99.4  | 96.4  | 104.6 | 98.7  |
| 164663791 | Prkca                      | 672  | 76.8  | Oxytocin signaling pathway; ErbB signaling pathway; Leukocyte transendothelial migration; AGE-RAGE signaling pathway in diabetic complications; mTOR signaling pathway; Morphine addiction; Wnt signaling pathway; Cholinergic synapse; Phospholipase D signaling pathway; Hypertrophic cardiomyopathy (HCM); Dilated cardiomyopathy; Thyroid hormone signaling pathway; Cardiac muscle contraction; Viral myocarditis; Tight junction; Adrenergic signaling in cardiomyocytes | 93.9  | 91.4  | 85.9  | 97.1  | 102.9 | 119.6 | 134.1 | 111.9 |
| 255918225 | Myh6                       | 1938 | 223.4 | Hypertrophic cardiomyopathy (HCM); Dilated cardiomyopathy; Thyroid hormone signaling pathway; Cardiac muscle contraction; Viral myocarditis; Tight junction; Adrenergic signaling in cardiomyocytes                                                                                                                                                                                                                                                                            | 232.4 | 174.9 | 95.1  | 100   | 73.1  | 90.1  | 75.4  | 93.5  |
| 30725764  | Pld4                       | 503  | 56.1  | Metabolic pathways; Ether lipid metabolism; Glycerophospholipid metabolism                                                                                                                                                                                                                                                                                                                                                                                                     | 194.9 | 179.4 | 166.9 | 158.6 | 67.1  | 71.7  | 61.5  | 74.4  |
| 40254224  | Wdhd1                      | 1081 | 120.3 |                                                                                                                                                                                                                                                                                                                                                                                                                                                                                | 71.6  | 57.8  | 75.9  | 55.7  | 118.3 | 114.4 | 184.7 | 268.3 |
| 170650630 | Sirt2                      | 389  | 43.2  |                                                                                                                                                                                                                                                                                                                                                                                                                                                                                | 100   | 102.7 | 96.2  | 88.3  | 105.1 | 103   | 85.3  | 83.9  |
| 163644329 | Apoe                       | 311  | 35.8  | Alzheimer's disease                                                                                                                                                                                                                                                                                                                                                                                                                                                            | 195.9 | 204.5 | 217.4 | 210.5 | 48    | 54.7  | 57.5  | 43.8  |
| 47059159  | Gatc                       | 155  | 16.7  | Metabolic pathways; Aminoacyl-tRNA biosynthesis                                                                                                                                                                                                                                                                                                                                                                                                                                | 108.4 | 89.4  | 101   | 94.4  | 108.3 | 113.2 | 110.2 | 118.1 |
| 13385134  | Spes2                      | 226  | 25    | Protein export                                                                                                                                                                                                                                                                                                                                                                                                                                                                 | 104.5 | 103.8 | 101.4 | 94.5  | 96.8  | 92    | 82.5  | 97    |
| 10946942  | Edfl                       | 148  | 16.4  |                                                                                                                                                                                                                                                                                                                                                                                                                                                                                | 110.9 | 114.9 | 109.1 | 101   | 90.2  | 85.8  | 107.5 | 110.9 |
| 31982524  | Ebag9                      | 213  | 24.3  |                                                                                                                                                                                                                                                                                                                                                                                                                                                                                | 108.6 | 112.6 | 102.3 | 99    | 106.2 | 99.7  | 105.9 | 100.6 |
| 6678553   | Vamp3                      | 103  | 11.5  | Phagosome; SNARE interactions in vesicular transport                                                                                                                                                                                                                                                                                                                                                                                                                           | 100.9 |       | 89    |       | 97.1  |       | 116.8 |       |
| 21312676  | Armc1                      | 282  | 31.2  |                                                                                                                                                                                                                                                                                                                                                                                                                                                                                | 95.3  | 90.9  | 90.8  | 85.4  | 107.7 | 110.1 | 107.7 | 120.5 |
| 117647253 | M09Rik;<br>Vwa9;<br>Ints14 | 515  | 57.2  |                                                                                                                                                                                                                                                                                                                                                                                                                                                                                | 94.1  | 99.1  | 106.8 | 111.5 | 95.7  | 94.3  | 99.5  | 98.9  |
| 254939582 | Lmf1                       | 574  | 65.8  |                                                                                                                                                                                                                                                                                                                                                                                                                                                                                | 112.9 | 132.4 | 102.8 | 102.8 | 124   | 118.4 | 103.7 | 122.9 |

|           |                                                 |      |       |                                                                                                                                                                                                                                                                 |       |       |       |       |       |       |       |       |
|-----------|-------------------------------------------------|------|-------|-----------------------------------------------------------------------------------------------------------------------------------------------------------------------------------------------------------------------------------------------------------------|-------|-------|-------|-------|-------|-------|-------|-------|
| 309265053 | Usmg5;<br>LOC1005<br>04912;<br>LOC1026<br>42507 | 58   | 6.4   |                                                                                                                                                                                                                                                                 | 47.9  | 48.1  | 128   | 132.8 | 173   | 167.6 | 93    | 91.9  |
| 254039729 | Rhot1                                           | 672  | 77    |                                                                                                                                                                                                                                                                 | 109.6 | 102.1 | 89.1  | 94.8  | 112   | 104.2 | 103   | 100.1 |
| 21746165  | Tmed5                                           | 229  | 26.2  |                                                                                                                                                                                                                                                                 | 94.5  | 103.5 | 84.8  | 89.7  | 119.8 | 111.2 | 103.2 | 98.4  |
| 58037467  | Bri3bp                                          | 253  | 28.2  |                                                                                                                                                                                                                                                                 | 134.3 | 111.8 | 91.7  | 91.1  | 105.1 | 108.6 | 89.8  | 85.9  |
| 31541959  | Chmp3                                           | 224  | 25.2  | Endocytosis                                                                                                                                                                                                                                                     | 98.5  | 97.2  | 111.4 | 106.2 | 100.6 | 100.6 | 103.3 | 106.7 |
| 124286818 | Orc4                                            | 433  | 50    | Cell cycle                                                                                                                                                                                                                                                      | 90.8  | 100.7 | 101.6 | 102   | 122.8 | 110.2 | 105.5 | 111.4 |
| 38570086  | Celf1                                           | 513  | 55.1  |                                                                                                                                                                                                                                                                 | 85.6  |       | 86.7  |       | 105.2 |       | 124.4 |       |
| 6671710   | Ms4a1                                           | 291  | 31.9  | Hematopoietic cell lineage                                                                                                                                                                                                                                      | 119.8 | 120.1 | 91.6  | 98    | 49.9  | 56.3  | 52.8  | 58.5  |
| 112181302 | Rabl6                                           | 725  | 79.8  |                                                                                                                                                                                                                                                                 | 100.3 |       | 97.9  |       | 107.9 |       | 111.8 |       |
| 58037133  | Ngdn                                            | 315  | 35.6  |                                                                                                                                                                                                                                                                 | 92.9  | 83.7  | 75.3  | 83.9  | 117.4 | 116.9 | 129.6 | 120.4 |
| 21704220  | Chmp1a                                          | 196  | 21.6  | Endocytosis                                                                                                                                                                                                                                                     | 113.9 | 111.1 | 102.1 | 100.2 | 88.5  | 87.9  | 95.8  | 94.9  |
| 28076891  | Zfp422                                          | 237  | 27.3  |                                                                                                                                                                                                                                                                 | 109.3 | 107.5 | 119.8 | 110.2 | 81.4  | 82.7  | 82.8  | 88.9  |
| 84490377  | Phf15;<br>Jade2                                 | 829  | 92.1  |                                                                                                                                                                                                                                                                 | 109.1 | 116   | 102.9 | 115.4 | 86.4  | 84.3  | 102.7 | 86.2  |
| 10048462  | Slc25a20                                        | 301  | 33    |                                                                                                                                                                                                                                                                 | 94.5  | 101.6 | 91.4  | 95.6  | 115.8 | 114.9 | 107.9 | 100.7 |
| 251823874 | Enoph1                                          | 257  | 28.6  | Metabolic pathways; Cysteine and methionine metabolism                                                                                                                                                                                                          | 122.8 | 121.2 | 117.2 | 117.1 | 72    | 79.7  | 89.1  | 87.2  |
| 11230780  | Tsg101                                          | 391  | 44.1  | Endocytosis                                                                                                                                                                                                                                                     | 108.4 | 100.3 | 97.4  | 99.6  | 106.2 | 97.8  | 88    | 98.3  |
| 6754382   | Cd47                                            | 324  | 35.3  | ECM-receptor interaction                                                                                                                                                                                                                                        | 96.1  | 94.2  | 88.4  | 91.8  | 101.9 | 98.3  | 109.5 | 112.5 |
| 91208439  | Ncapg2                                          | 1138 | 130.8 |                                                                                                                                                                                                                                                                 | 71.7  | 60.3  | 47.7  | 39.5  | 165.7 | 169.4 | 151.5 | 169.8 |
| 84370337  | Etv6                                            | 485  | 56.4  | Dorso-ventral axis formation; Transcriptional misregulation in cancer                                                                                                                                                                                           | 102.5 | 88.8  | 80.7  | 75.5  | 127.6 | 119.7 | 121.2 | 129.4 |
| 19526970  | Gpn1                                            | 372  | 41.6  |                                                                                                                                                                                                                                                                 | 94.9  | 90.5  | 98.6  | 79.6  | 111.1 | 119   | 113.7 | 131.7 |
| 124486849 | Taf2                                            | 1198 | 136.8 | Basal transcription factors                                                                                                                                                                                                                                     | 104.7 | 102.1 | 100.9 | 105.5 | 107.5 | 98.3  | 95    | 95.8  |
| 226246610 | Man2a1                                          | 1150 | 131.5 | Metabolic pathways; N-Glycan biosynthesis                                                                                                                                                                                                                       | 93.2  | 94.3  | 80.2  | 82.9  | 113.2 | 116.7 | 113.2 | 115   |
| 28461141  | Taf7                                            | 341  | 39.1  | Basal transcription factors                                                                                                                                                                                                                                     | 108.8 | 105.5 | 109.6 | 99.3  | 99.8  | 91.8  | 94.8  | 98.2  |
| 110625591 | Rbm22                                           | 420  | 46.9  | Spliceosome                                                                                                                                                                                                                                                     | 102.2 | 100.8 | 103.2 | 104.1 | 91.7  | 93    | 104.3 | 100.4 |
| 274320439 | Gnl3l                                           | 577  | 65.2  | Ribosome biogenesis in eukaryotes                                                                                                                                                                                                                               | 89.3  |       | 98.4  |       | 114.7 |       | 98.1  |       |
| 111154109 | Nras                                            | 189  | 21.2  | Oxytocin signaling pathway; ErbB signaling pathway; FoxO signaling pathway; Acute myeloid leukemia; AGE-RAGE signaling pathway in diabetic complications; mTOR signaling pathway; Cholinergic synapse; T cell receptor signaling pathway; Phospholipase D signa | 93.2  | 96.6  | 95.1  | 93.5  | 101.7 | 104.3 | 104.3 | 94.6  |
| 18390325  | Cxxc1                                           | 660  | 76.1  |                                                                                                                                                                                                                                                                 | 100.9 | 95.4  | 103.4 | 102.7 | 95.8  | 93.8  | 96.1  | 98.1  |
| 161016790 | Slc7a1                                          | 622  | 67    | MicroRNAs in cancer                                                                                                                                                                                                                                             | 58.9  | 78.7  | 56.4  | 71.7  | 143.8 | 126.1 | 147   | 118.4 |
| 281182477 | Dynll2                                          | 89   | 10.3  | Vasopressin-regulated water reabsorption                                                                                                                                                                                                                        | 101.7 | 104.6 | 133.3 | 128   | 89.1  | 90.5  | 56.6  | 71.7  |
| 257096071 | Trmt1                                           | 663  | 72.3  |                                                                                                                                                                                                                                                                 | 140.9 | 123.4 | 98.6  | 103.7 | 90.7  | 96.7  | 95.9  | 94.6  |
| 226958514 | Samd9l                                          | 1579 | 182.1 |                                                                                                                                                                                                                                                                 | 105.5 | 104   | 99.6  | 101.1 | 88.7  | 86.8  | 96.5  | 100.1 |



|           |                                         |      |       |                                                                                                                               |       |       |       |       |       |       |       |       |
|-----------|-----------------------------------------|------|-------|-------------------------------------------------------------------------------------------------------------------------------|-------|-------|-------|-------|-------|-------|-------|-------|
| 13385598  | Snrpd3                                  | 126  | 13.9  | Spliceosome; Systemic lupus erythematosus                                                                                     | 100.2 | 94.4  | 98.2  | 97.9  | 93.7  | 93    | 104.8 | 105.3 |
| 94681040  | Tacc3                                   | 630  | 70.4  | RNA transport                                                                                                                 | 76.6  | 81.3  | 83.7  | 101.8 | 143.4 | 119.4 | 127.3 | 126.7 |
| 19526463  | Erp29                                   | 262  | 28.8  | Protein processing in endoplasmic reticulum                                                                                   | 101.3 | 103.4 | 82.4  | 83.9  | 109.1 | 110.8 | 116.6 | 106.1 |
| 75905504  | Pus10                                   | 527  | 59.7  |                                                                                                                               | 89.1  | 94.1  | 99.4  | 89.3  | 117.5 | 102.7 | 108.3 | 112.5 |
| 190610049 | Gm2382;<br>Mthfs1                       | 203  | 23.2  | Metabolic pathways; One carbon pool by folate                                                                                 | 121.3 | 131.3 | 125.8 | 121.6 | 72    | 70.5  | 76    | 81.3  |
| 33859722  | Tmx1                                    | 278  | 31.4  |                                                                                                                               | 93.6  | 98.1  | 106.9 | 99.7  | 103.1 | 99.1  | 100.6 | 100   |
| 89111939  | Exoc1                                   | 901  | 102.6 |                                                                                                                               | 103.3 | 99.8  | 98.3  | 95.7  | 100.1 | 100.5 | 100   | 101.2 |
| 6678265   | Dynl1b;<br>Dynl1f;<br>Dynl1c;<br>Dynl1a | 113  | 12.5  |                                                                                                                               | 117.8 | 100.7 | 111.2 | 88    | 92.7  | 90.5  | 90.7  | 99    |
| 56699478  | Atp2b3                                  | 1220 | 134.3 |                                                                                                                               |       |       |       |       |       |       |       |       |
| 86476069  | Rab43                                   | 210  | 23.2  |                                                                                                                               | 90.1  | 127.5 | 89.7  | 84.1  | 129.1 | 102   | 128   | 110.6 |
| 377837185 | Nhp211;<br>Snu13;<br>LOC1008<br>62468   | 128  | 14.2  | Spliceosome; Ribosome biogenesis in eukaryotes                                                                                |       | 119   |       | 97.6  |       | 88.1  |       | 97.9  |
| 24418913  | Edc3                                    | 508  | 55.9  | RNA degradation                                                                                                               | 100.4 | 98.9  | 88.5  | 89.3  | 105.4 | 121.8 | 119.1 | 110.6 |
| 260166608 | Akt1                                    | 488  | 56.4  |                                                                                                                               | 96    |       | 86.9  |       | 92.4  |       | 83.2  |       |
| 58037151  | Bola1                                   | 137  | 14.4  |                                                                                                                               | 110.3 | 117.2 | 100   | 94.7  | 97.7  | 94.3  | 107.6 | 114.1 |
| 170932488 | Rbl2                                    | 1135 | 127.4 | FoxO signaling pathway; Cell cycle; PI3K-Akt signaling pathway; Viral carcinogenesis                                          |       | 108.6 |       | 102.6 |       | 87.5  |       | 88.9  |
| 68299774  | Arl14ep                                 | 276  | 31    |                                                                                                                               | 101.2 | 102.7 | 100.9 | 103.3 | 93.9  | 90.7  | 103.8 | 97.9  |
| 13384694  | Zfp524                                  | 321  | 34.8  |                                                                                                                               | 124.1 |       | 106   |       | 91.1  |       | 99.7  |       |
| 13752587  | Plekha2                                 | 425  | 47.4  |                                                                                                                               | 103   | 107.5 | 98.4  | 93.1  | 100.9 | 103.5 | 105.5 | 98.6  |
| 226246542 | Rnaseh1                                 | 285  | 31.8  |                                                                                                                               | 105.9 | 103.9 | 96.6  | 99.3  | 96.8  | 103.8 | 105.2 | 106.8 |
| 77917602  | Ubfd1                                   | 368  | 40.1  |                                                                                                                               | 98.6  | 95.9  | 97.9  | 100.3 | 93.9  | 108.8 | 112.4 | 103.4 |
| 241666402 | Ercc4                                   | 917  | 103.6 | Nucleotide excision repair; Fanconi anemia pathway                                                                            | 112.1 | 103.6 | 103.6 | 108.7 | 99.4  | 98.9  | 97    | 111.6 |
| 6755580   | Smn1                                    | 288  | 31.2  | RNA transport                                                                                                                 | 75.4  | 73.2  | 72.3  | 79.9  | 111.9 | 121   | 134.3 | 123.1 |
| 13385676  | Frmf8                                   | 466  | 51.8  |                                                                                                                               | 107.2 | 110.5 | 91.3  | 99.3  | 112.7 | 111.9 | 103   | 94.4  |
| 33469043  | Ncln                                    | 563  | 62.9  |                                                                                                                               | 93.3  | 93    | 88    | 89.7  | 109.4 | 100.3 | 99.9  | 96.3  |
| 31981890  | B2m                                     | 119  | 13.8  | Antigen processing and presentation                                                                                           | 103.4 | 103.7 | 103   | 103.5 | 88    | 87.2  | 102.3 | 102.6 |
| 262331515 | Hmga1                                   | 118  | 13    |                                                                                                                               | 125.8 | 127.5 | 126.2 | 129.6 | 76.5  | 73.7  | 94.2  | 95.3  |
| 188035926 | Ndufaf2                                 | 168  | 19.6  |                                                                                                                               | 95.3  | 99.8  | 91.8  | 87.9  | 113.7 | 117.4 | 124.9 | 120.4 |
| 359807125 | Akt1s1                                  | 257  | 27.5  | mTOR signaling pathway; Longevity regulating pathway; AMPK signaling pathway; Longevity regulating pathway - multiple species | 79    | 93.1  | 98    | 99.1  | 93.6  | 95.2  | 171.2 | 148.9 |
| 21699066  | Appl1                                   | 707  | 79.3  | Longevity regulating pathway; Pathways in cancer; Colorectal cancer                                                           | 95.4  | 100.6 | 117.6 | 103.6 | 102.9 | 95.1  | 69.4  | 103.8 |
| 110681729 | Ube2z                                   | 356  | 38.3  | Ubiquitin mediated proteolysis                                                                                                | 104   | 99.9  | 100.5 | 97.4  | 99.2  | 97.7  | 93.2  | 93.5  |

|           |                   |      |       |                                                                                                                                                |       |       |       |       |       |       |       |       |
|-----------|-------------------|------|-------|------------------------------------------------------------------------------------------------------------------------------------------------|-------|-------|-------|-------|-------|-------|-------|-------|
| 40789094  | Zhx2              | 836  | 92.2  |                                                                                                                                                | 103.7 | 117   | 88.5  | 97.6  | 105.2 | 97.4  | 104   | 106.5 |
| 281604088 | Idi1              | 283  | 32.5  | Metabolic pathways; Terpenoid backbone biosynthesis                                                                                            | 80    | 80.5  | 75.2  | 72.6  | 115.1 | 115.1 | 125.1 | 129.6 |
| 21311873  | Hsbp1             | 76   | 8.6   |                                                                                                                                                | 115.6 | 113.9 | 101.7 | 102.5 | 84.2  | 88.2  | 107.4 | 107   |
| 156713423 | Psmc8             | 353  | 39.9  | Proteasome; Epstein-Barr virus infection                                                                                                       | 97.4  | 92    | 85.8  | 86.9  | 116.3 | 109.2 | 118.6 | 110.1 |
| 19527102  | Stx12             | 274  | 31.2  | Phagosome                                                                                                                                      | 112.6 | 107.3 | 115.5 | 119   | 98.9  | 100   | 109.6 | 97.1  |
| 270483835 | Zfp592            | 1262 | 137.4 |                                                                                                                                                | 99.8  | 117.8 | 99    | 101.2 | 106.8 | 103.2 | 106.3 | 94.1  |
| 12963793  | 1810009J<br>06Rik | 247  | 26.5  | Pancreatic secretion; Protein digestion and absorption;<br>Influenza A; Neuroactive ligand-receptor interaction                                | 80.9  | 76.3  | 97.9  | 103.2 | 142.2 | 160   | 115   | 113.9 |
| 30089716  | Arrb1             | 418  | 46.9  | Endocytosis; Morphine addiction; MAPK signaling<br>pathway; Chemokine signaling pathway; Hedgehog<br>signaling pathway; Olfactory transduction | 132.8 | 110.7 | 107.6 | 104.4 | 83.1  | 90.4  | 61    | 91.2  |
| 226442837 | Haus5             | 619  | 69.5  |                                                                                                                                                | 91.9  | 95.9  | 95.9  | 92.6  | 99.8  | 104.5 | 107.2 | 112.9 |
| 156255157 | Acad10            | 1069 | 118.9 |                                                                                                                                                | 108.9 | 116.4 | 108.1 | 101.1 | 105.6 | 113.2 | 97.3  | 100.8 |
| 22779893  | Ccdc137           | 290  | 32.9  |                                                                                                                                                | 90.8  | 91.5  | 123.2 | 145.3 | 105.1 | 105.8 | 106.6 | 92.6  |
| 160333291 | Rbm6              | 1118 | 128.3 |                                                                                                                                                | 110.3 | 112.4 | 104.8 | 102.2 | 95.9  | 101.4 | 105.9 | 102.2 |
| 168480115 | Dcaf13            | 445  | 51.4  |                                                                                                                                                | 93.4  | 103.7 | 91.4  | 102.2 | 105.6 | 94.1  | 105.5 | 113.2 |
| 30466247  | Cpsf4             | 211  | 23.6  | mRNA surveillance pathway; Influenza A                                                                                                         | 98.3  | 97.6  | 99.7  | 97.1  | 100.1 | 99.1  | 102.5 | 106.8 |
| 28077063  | 3110002H<br>16Rik | 657  | 74.9  |                                                                                                                                                | 112.8 | 123.2 | 108.4 | 121.2 | 100   | 104.7 | 100.6 | 95.8  |
| 148539988 | Spg7              | 781  | 85.9  |                                                                                                                                                | 99.1  | 118.2 | 116.1 | 103.7 | 97.8  | 104.7 | 87.3  | 89.6  |
| 13385578  | Mrps24            | 167  | 18.9  |                                                                                                                                                | 100.7 | 92.5  | 95.1  | 97.2  | 115.5 | 117.1 | 92.9  | 91.6  |
| 154091026 | Ubr1              | 1757 | 200.1 |                                                                                                                                                | 113.5 | 105.9 | 95.6  | 96.6  | 96    | 102.6 | 92.5  | 98.8  |
| 270341364 | Zfp574            | 900  | 99.4  |                                                                                                                                                | 97.3  |       | 109.1 |       | 109.9 |       | 107.3 |       |
| 6753742   | Eif4ebp2          | 120  | 12.9  | RNA transport; Longevity regulating pathway - multiple<br>species                                                                              | 114.4 | 114.9 | 114.4 | 115.6 | 88    | 93.8  | 82.5  | 88.5  |
| 238231384 | Psmc6             | 238  | 25.4  | Proteasome                                                                                                                                     | 101   | 78.2  | 72.5  | 72.6  | 120.7 | 123.5 | 119.4 | 129.2 |
| 14140240  | Golph3            | 298  | 33.7  | Transcriptional misregulation in cancer                                                                                                        | 95.8  | 93.8  | 100.6 | 95    | 100.1 | 107.3 | 85.1  | 73.6  |
| 172073160 | Gmeb1             | 562  | 61    |                                                                                                                                                | 112.3 | 114   | 99.1  | 101.9 | 98    | 98.8  | 92.3  | 86.4  |
| 120407048 | Mfn2              | 757  | 86.1  | NOD-like receptor signaling pathway                                                                                                            | 108   | 99.6  | 96.2  | 100.3 | 102.1 | 99.9  | 75.6  | 99.7  |
| 312433993 | Gpsm1             | 705  | 78.1  |                                                                                                                                                | 103.3 | 108.6 | 85    | 80.2  | 114.5 | 112.4 | 124.6 | 137.2 |
| 31980834  | Dus11             | 475  | 53.5  |                                                                                                                                                | 95.5  | 100   | 98.4  | 104.2 | 98.3  | 101.8 | 91    | 98.5  |
| 20149312  | Med25             | 745  | 78.1  |                                                                                                                                                | 102.5 | 98.5  | 87.2  | 94.6  | 96.2  | 102.3 | 115.1 | 110.2 |
| 148277650 | Pdp1              | 574  | 65    |                                                                                                                                                | 103.8 | 97    | 106.1 | 115.7 | 106.3 | 110.5 | 95.5  | 93.8  |
| 85662410  | Clip2             | 1047 | 115.8 |                                                                                                                                                | 96.2  | 102.2 | 100.7 | 92.3  | 99.1  | 104.1 | 107.6 | 105.3 |
| 149263574 | Gm6750            | 90   | 9.4   |                                                                                                                                                | 116.4 | 115.5 | 115.7 | 115.3 | 83.9  | 83.2  | 107.5 | 102.9 |
| 170650679 | E130309D<br>02Rik | 448  | 49.9  |                                                                                                                                                | 112.4 | 116.2 | 95.8  | 101.3 | 101.4 | 109.8 | 95.4  | 85.4  |

|           |            |      |       |                                                                                                                                                                                                                                                                 |       |       |       |       |       |       |       |       |
|-----------|------------|------|-------|-----------------------------------------------------------------------------------------------------------------------------------------------------------------------------------------------------------------------------------------------------------------|-------|-------|-------|-------|-------|-------|-------|-------|
| 122937368 | Eif4ebp1   | 117  | 12.3  | ErbB signaling pathway; Acute myeloid leukemia; mTOR signaling pathway; Insulin signaling pathway; Longevity regulating pathway; HIF-1 signaling pathway; PI3K-Akt signaling pathway; AMPK signaling pathway; EGFR tyrosine kinase inhibitor resistance; RNA tr | 84.6  | 74.3  | 99    | 76.6  | 116.4 | 126.7 | 108.7 | 147.7 |
| 21311867  | Coa3       | 108  | 12    |                                                                                                                                                                                                                                                                 | 117.6 | 122.6 | 94.6  | 90    | 101.2 | 102   | 116.2 | 112.7 |
| 125662573 | Sfr1       | 319  | 35.2  |                                                                                                                                                                                                                                                                 | 95.3  | 96.6  | 93.1  | 91.2  | 107.3 | 110.1 | 106.8 | 106.5 |
| 167466245 | Nedd4l     | 976  | 112.2 | Endocytosis; Ubiquitin mediated proteolysis; Aldosterone-regulated sodium reabsorption                                                                                                                                                                          | 89.6  | 99.8  | 79.7  | 97.5  | 127.8 | 92.4  | 105.2 | 109.6 |
| 269315840 | Gadd45gip1 | 222  | 25.8  |                                                                                                                                                                                                                                                                 | 100.4 | 93.8  | 88.7  | 91.7  | 106   | 107.6 | 114.5 | 117.4 |
| 6677987   | Slbp       | 275  | 31.6  |                                                                                                                                                                                                                                                                 | 63.8  | 81.8  | 62.2  | 74.1  | 142.2 | 120.8 | 165.1 | 137.7 |
| 70778932  | Rnf121     | 327  | 38    |                                                                                                                                                                                                                                                                 | 98.8  | 103.6 | 90.5  | 99.7  | 116.9 | 118.4 | 103.4 | 95.6  |
| 6753166   | Bcl10      | 233  | 25.9  | T cell receptor signaling pathway; Tuberculosis; B cell receptor signaling pathway; NF-kappa B signaling pathway                                                                                                                                                | 93    | 110.5 | 97.6  | 90.4  | 105.9 | 106.4 | 102.9 | 110.7 |
| 114205442 | Idnk       | 184  | 20    | Metabolic pathways; Pentose phosphate pathway; Carbon metabolism                                                                                                                                                                                                | 120.9 | 127   | 116   | 106.3 | 77.1  | 73.6  | 84.1  | 84.7  |
| 89257354  | Map3k2     | 619  | 69.6  | MAPK signaling pathway; GnRH signaling pathway; Gap junction                                                                                                                                                                                                    |       | 120.4 |       | 100.6 |       | 95.6  |       | 94.3  |
| 21450149  | Pycr1      | 309  | 32.4  | Arginine and proline metabolism; Metabolic pathways; Biosynthesis of amino acids                                                                                                                                                                                |       | 94.5  |       | 76.1  |       | 129.1 |       | 133.3 |
| 139948756 | Ing3       | 421  | 46.8  |                                                                                                                                                                                                                                                                 | 97.3  | 94.5  | 92.6  | 87.9  | 104.3 | 95.4  | 104.4 | 107.3 |
| 110625975 | Pdk1       | 434  | 49    | Axon guidance; HIF-1 signaling pathway; Central carbon metabolism in cancer                                                                                                                                                                                     | 131.5 | 132.4 | 95.5  | 95.7  | 87.1  | 89.9  | 82.1  | 76.3  |
| 240120047 | Rars2      | 578  | 65.3  | Aminoacyl-tRNA biosynthesis                                                                                                                                                                                                                                     | 109.6 | 103.1 | 90.7  | 93    | 131.7 | 122.4 | 105.2 | 113.7 |
| 19527052  | Cdc123     | 336  | 38.8  |                                                                                                                                                                                                                                                                 | 88.1  | 87.5  | 85.4  | 92.5  | 120.9 | 117.5 | 126.6 | 117.7 |
| 160948575 | Terf2ip    | 393  | 43.3  |                                                                                                                                                                                                                                                                 | 105.4 | 107.7 | 94.4  | 91.7  | 93.4  | 92    | 109.2 | 97.5  |
| 6753176   | Bcl7c      | 217  | 23.4  |                                                                                                                                                                                                                                                                 | 107.5 | 106.8 | 91.5  | 89.9  | 111.1 | 101.4 | 105.2 | 111.3 |
| 113865877 | Akna       | 1404 | 153   |                                                                                                                                                                                                                                                                 | 116.1 | 107.3 | 84.4  | 101.5 | 108.6 | 102.3 | 97.3  | 99.1  |
| 31542421  | Crkl       | 303  | 33.8  | ErbB signaling pathway; Regulation of actin cytoskeleton; MAPK signaling pathway; MicroRNAs in cancer; Focal adhesion; Insulin signaling pathway; Chemokine signaling pathway; Fc gamma R-mediated phagocytosis; Neurotrophin signaling pathway; Ran1 signaling | 114.8 | 120.2 | 102.6 | 99.4  | 88.8  | 93.8  | 96.7  | 95.5  |
| 28077013  | Smap1      | 440  | 47.6  | Endocytosis                                                                                                                                                                                                                                                     | 95.8  | 99.9  | 107.7 | 92.1  | 99.4  | 105.9 | 103.1 | 112.3 |
| 58037259  | Vps11      | 941  | 107.7 |                                                                                                                                                                                                                                                                 | 109.9 | 105.7 | 103.9 | 94.6  | 96.6  | 91    | 85.9  | 86    |
| 21312402  | Leng1      | 261  | 30.5  |                                                                                                                                                                                                                                                                 | 115.6 | 112.6 | 111.4 | 105   | 85.4  | 85    | 88.3  | 92.9  |
| 13385320  | Vps28      | 221  | 25.4  | Endocytosis                                                                                                                                                                                                                                                     | 118.5 | 116.8 | 99.4  | 100.8 | 94.9  | 98.9  | 81.1  | 91.3  |
| 31543845  | Tbl2       | 442  | 49.6  |                                                                                                                                                                                                                                                                 | 88.6  | 93.4  | 83.5  | 83.3  | 115.7 | 125.7 | 125   | 122.9 |
| 47059059  | Ctdspl2    | 465  | 52.8  |                                                                                                                                                                                                                                                                 | 122.9 | 101.3 | 100.7 | 96.8  | 98.4  | 102.4 | 90.1  | 97.5  |
| 124487167 | Itpkb      | 942  | 102.6 | Metabolic pathways; Calcium signaling pathway; Inositol phosphate metabolism; Phosphatidylinositol signaling                                                                                                                                                    | 100   | 97.2  | 105.8 | 106.8 | 91.8  | 76    | 93.9  | 87.7  |
| 114158672 | Nisch      | 1593 | 174.9 |                                                                                                                                                                                                                                                                 | 99.1  | 107.1 | 109   | 104.4 | 94.5  | 96.5  | 98.9  | 98.6  |

|           |                             |      |       |                                                                                                                                                                                                                                                                 |       |       |       |       |       |       |       |       |
|-----------|-----------------------------|------|-------|-----------------------------------------------------------------------------------------------------------------------------------------------------------------------------------------------------------------------------------------------------------------|-------|-------|-------|-------|-------|-------|-------|-------|
| 6754706   | Mareks1                     | 200  | 20.2  | Fc gamma R-mediated phagocytosis; Leishmaniasis                                                                                                                                                                                                                 | 93.9  | 63.2  | 76.4  | 49.5  | 104.4 | 130.8 | 137.4 | 176.5 |
| 41281924  | Bre;<br>Babam2              | 420  | 48.1  |                                                                                                                                                                                                                                                                 | 125.2 | 126.2 | 77.5  | 78.2  | 71.1  | 79.4  | 108.8 | 100.9 |
| 6755775   | Tgfb1                       | 390  | 44.3  | FoxO signaling pathway; AGE-RAGE signaling pathway in diabetic complications; Endocytosis; Hypertrophic cardiomyopathy (HCM); Chagas disease (American trypanosomiasis); MAPK signaling pathway; Rheumatoid arthritis; Toxoplasmosis; Hippo signaling pathway   |       | 82    |       | 71.2  |       | 130.9 |       | 126.4 |
| 13385140  | Sike1                       | 207  | 23.5  | RIG-I-like receptor signaling pathway                                                                                                                                                                                                                           | 96    | 112.2 | 147.4 | 100.2 | 103.4 | 95.7  | 93.6  | 101   |
| 40254183  | Dph5                        | 281  | 31.2  |                                                                                                                                                                                                                                                                 | 93.8  | 98.2  | 100.7 | 107.3 | 102.1 | 96.3  | 106.1 | 102.1 |
| 161484628 | Mocs1                       | 636  | 69.8  | Metabolic pathways; Folate biosynthesis                                                                                                                                                                                                                         | 104.1 | 116.2 | 103   | 100.4 | 95.5  | 100.4 | 92.5  | 88.9  |
| 268370235 | Fam45a                      | 357  | 40.4  |                                                                                                                                                                                                                                                                 | 100   | 102.7 | 102.4 | 94    | 96.3  | 101.5 | 83.4  | 110.3 |
| 16716569  | Prss1                       | 246  | 26.1  |                                                                                                                                                                                                                                                                 | 69.8  | 64.2  | 109   | 103.2 | 139   | 142.7 | 97.7  | 98.9  |
| 281182368 | Stim2                       | 746  | 83.9  | Calcium signaling pathway                                                                                                                                                                                                                                       | 88.1  | 86.2  | 93.2  | 86.8  | 114.1 | 113.1 | 108.1 | 105   |
| 145207976 | Mtmr3                       | 1159 | 129.6 | Metabolic pathways; Inositol phosphate metabolism; Phosphatidylinositol signaling system                                                                                                                                                                        | 109.6 | 111.7 | 94.3  | 114.1 | 100.3 | 89.3  | 115.3 | 101.9 |
| 112821702 | Ttpal                       | 343  | 38.8  |                                                                                                                                                                                                                                                                 | 94.2  | 87.6  | 99.9  | 101.3 | 105.2 | 97.5  | 110   | 110   |
| 251823839 | Tbk1                        | 729  | 83.4  | Herpes simplex infection; Ras signaling pathway; NOD-like receptor signaling pathway; Epstein-Barr virus infection; RIG-I-like receptor signaling pathway; Hepatitis B; Toll-like receptor signaling pathway; Influenza A; Hepatitis C; Cytosolic DNA sensing   | 103.5 | 105.7 | 99.8  | 104.3 | 107.9 | 93.8  | 101.9 | 98.7  |
| 21312260  | Aldh1b1                     | 519  | 57.5  | Histidine metabolism; Pyruvate metabolism; Arginine and proline metabolism; Tryptophan metabolism; Valine, leucine and isoleucine degradation; Metabolic pathways; Lysine degradation; Fatty acid degradation; Glycolysis / Gluconeogenesis; beta-Alanine metab | 101   | 106.6 | 99.3  | 92    | 91.3  | 89.5  | 100.5 | 100.4 |
| 12963867  | Scyl1                       | 806  | 89.1  |                                                                                                                                                                                                                                                                 | 98.1  | 95.8  | 106   | 100.9 | 113.8 | 101.7 | 103.5 | 97.5  |
| 32469497  | Champ1;<br>Zfp828           | 802  | 87.5  |                                                                                                                                                                                                                                                                 | 86.9  | 104.9 | 113   | 96.1  | 107.6 | 104.8 | 103.3 | 100.5 |
| 12963555  | Nit2                        | 276  | 30.5  | Alanine, aspartate and glutamate metabolism                                                                                                                                                                                                                     | 121   | 115.7 | 115.1 | 111.3 | 87.1  | 87.8  | 68.7  | 68.7  |
| 162417977 | Idh1                        | 414  | 46.6  | Glutathione metabolism; Citrate cycle (TCA cycle); Metabolic pathways; Biosynthesis of amino acids; 2-Oxocarboxylic acid metabolism; Carbon metabolism                                                                                                          | 116.1 | 114.6 | 101.6 | 108.6 | 88.6  | 91.2  | 78.5  | 78.6  |
| 110625965 | 1600027N<br>09Rik;<br>MrGBP | 204  | 22.4  |                                                                                                                                                                                                                                                                 | 107.2 | 106.8 | 100.3 | 95.8  | 95.5  | 96.3  | 105.8 | 117.1 |
| 161484650 | Reps1                       | 795  | 86.5  |                                                                                                                                                                                                                                                                 | 109.1 | 93    | 93.4  | 85.1  | 89.1  | 118.4 | 98.9  | 108.2 |
| 31981470  | Mrpl3                       | 348  | 39.1  | Ribosome                                                                                                                                                                                                                                                        | 110.4 | 104.8 | 109.6 | 103   | 134.4 | 132.9 | 100.9 | 101.6 |
| 125346020 | Ppp2r5c                     | 524  | 60.8  | mRNA surveillance pathway; Dopaminergic synapse; Oocyte meiosis; Sphingolipid signaling pathway; PI3K-Akt signaling pathway; AMPK signaling pathway; Adrenergic signaling in cardiomyocytes                                                                     |       | 107.5 |       | 101.8 |       | 97.1  |       | 92.8  |

|           |                                           |      |       |                                                                                                                                                                                                                                                                |       |       |       |       |       |       |       |       |
|-----------|-------------------------------------------|------|-------|----------------------------------------------------------------------------------------------------------------------------------------------------------------------------------------------------------------------------------------------------------------|-------|-------|-------|-------|-------|-------|-------|-------|
| 11612509  | Ralb                                      | 206  | 23.3  | Phospholipase D signaling pathway; Ras signaling pathway; Rap1 signaling pathway; Pathways in cancer; Pancreatic cancer                                                                                                                                        | 83.3  | 100.1 | 92.3  | 94    | 96.6  | 96.4  | 113.9 | 105.1 |
| 358679369 | Atg7                                      | 741  | 82.2  |                                                                                                                                                                                                                                                                | 93.8  | 94.2  | 98.6  | 98.8  | 103.1 | 102.4 | 106.4 | 101.3 |
| 312283711 | Slc29a1                                   | 460  | 50.2  | Alcoholism                                                                                                                                                                                                                                                     | 59    | 60    | 57    | 57.9  | 142.5 | 147.6 | 143.3 | 141.4 |
| 124487239 | Kat6a;<br>Myst3                           | 2003 | 224.7 | Signaling pathways regulating pluripotency of stem cells                                                                                                                                                                                                       | 107.9 | 98.1  | 111.6 | 104.2 | 96.6  | 102.2 | 92.6  | 92.2  |
| 13384642  | Synj2bp;<br>Gm20498;<br>Synj2bp-<br>cox16 | 145  | 15.8  |                                                                                                                                                                                                                                                                | 86    | 97.6  | 91.8  | 101.5 | 111   | 101   | 111.3 | 105.3 |
| 254826790 | Slc25a10;<br>0610009L<br>18Rik            | 287  | 31.7  | Proximal tubule bicarbonate reclamation                                                                                                                                                                                                                        | 115.8 | 103.4 | 90.5  | 103.9 | 117   | 112.6 | 119.6 | 113.6 |
| 113865923 | Gm12185                                   | 835  | 94.4  |                                                                                                                                                                                                                                                                | 79.8  |       | 87.8  |       | 126.7 |       | 101.7 |       |
| 33859684  | Kin                                       | 391  | 44.7  |                                                                                                                                                                                                                                                                | 101.7 | 99.1  | 95.1  | 103.4 | 104.1 | 108.1 | 98.5  | 99    |
| 227496324 | Tgs1                                      | 853  | 96.7  | RNA transport                                                                                                                                                                                                                                                  | 88.8  | 84.5  | 90.9  | 89.6  | 113.8 | 105.7 | 92.8  | 86.4  |
| 13384834  | Thoc7                                     | 204  | 23.7  | RNA transport                                                                                                                                                                                                                                                  | 108.7 | 106   | 93.4  | 96.4  | 99.1  | 100.8 | 105.5 | 107.3 |
| 28076957  | Ecd                                       | 641  | 71.7  |                                                                                                                                                                                                                                                                | 87.6  |       | 86.9  |       | 149.2 |       | 111.4 |       |
| 359751389 | Slc4a2                                    | 1237 | 136.7 | Pancreatic secretion; Bile secretion; Salivary secretion; Gastric acid secretion                                                                                                                                                                               | 96.3  | 96.3  | 93.4  | 85.5  | 101.2 | 98.7  | 108.8 | 119   |
| 6677691   | Rcn1                                      | 325  | 38.1  |                                                                                                                                                                                                                                                                | 99.8  | 103.3 | 99.4  | 94.1  | 101.5 | 97.2  | 95.1  | 100.6 |
| 145386524 | Nbn                                       | 751  | 83.7  | Homologous recombination                                                                                                                                                                                                                                       | 181.2 | 123.9 | 92.6  | 85.2  | 136.9 | 120.5 | 92.1  | 104.8 |
| 9507023   | Rabgga                                    | 567  | 64.9  |                                                                                                                                                                                                                                                                | 100.3 | 101.8 | 88.1  | 84    | 114.9 | 117.1 | 114.7 | 99.8  |
| 160333744 | Cog6                                      | 657  | 73    |                                                                                                                                                                                                                                                                | 101.4 | 109.6 | 101.1 | 101   | 105.4 | 105.7 | 102.5 | 102.6 |
| 229577278 | Smarcal1                                  | 910  | 100.8 |                                                                                                                                                                                                                                                                | 106.4 | 108.9 | 96.8  | 94.6  | 101.2 | 102.1 | 93.5  | 99.9  |
| 31543224  | Smad4                                     | 551  | 60.3  | FoxO signaling pathway; AGE-RAGE signaling pathway in diabetic complications; Wnt signaling pathway; Hippo signaling pathway; Signaling pathways regulating pluripotency of stem cells; Hepatitis B; HTLV-I infection; Adherens junction; Cell cycle: TGE-beta | 110.9 | 111.9 | 84.5  | 87.9  | 86.7  | 82.1  | 98.2  | 99.1  |
| 21312396  | Pold4                                     | 107  | 12.4  | DNA replication; Homologous recombination; Metabolic pathways; HTLV-I infection; Purine metabolism; Nucleotide excision repair; Pyrimidine metabolism; Base excision repair; Mismatch repair                                                                   |       | 110.6 |       | 94.7  |       | 81.4  |       | 99.3  |
| 12963539  | Ethel                                     | 254  | 27.7  | Sulfur metabolism                                                                                                                                                                                                                                              | 101.6 | 99.2  | 108.9 | 103.9 | 99.4  | 103.5 | 90    | 97.7  |
| 70608139  | Brap                                      | 591  | 66.9  | Ras signaling pathway                                                                                                                                                                                                                                          | 99    | 106.9 | 96.1  | 99.3  | 104.5 | 95.1  | 105.1 | 94.1  |
| 6997243   | Srgn                                      | 152  | 16.7  |                                                                                                                                                                                                                                                                | 67.4  | 62.9  | 67.8  | 60.4  | 138.6 | 130.3 | 144.9 | 149.5 |
| 31980744  | Atp51                                     | 103  | 11.4  | Metabolic pathways; Oxidative phosphorylation                                                                                                                                                                                                                  | 91    | 91.5  | 97.8  | 94.1  | 106.6 | 102.6 | 100.8 | 105.6 |
| 289191399 | Sphk2                                     | 617  | 65.6  | VEGF signaling pathway; Metabolic pathways; Tuberculosis; Sphingolipid signaling pathway; Fc gamma R-mediated phagocytosis; Sphingolipid metabolism; Calcium signaling pathway                                                                                 | 103.7 | 99.7  | 100.3 | 88.8  | 114.5 | 120.1 | 97.2  | 100.3 |

|           |                         |      |       |                                                                                                                                                                                                                                                                 |       |       |       |       |       |       |       |       |
|-----------|-------------------------|------|-------|-----------------------------------------------------------------------------------------------------------------------------------------------------------------------------------------------------------------------------------------------------------------|-------|-------|-------|-------|-------|-------|-------|-------|
| 194440700 | Nucb2                   | 420  | 50.3  |                                                                                                                                                                                                                                                                 | 106.7 | 107.1 | 93.3  | 90.9  | 106.5 | 109.8 | 104.6 | 110   |
| 226442882 | Usp36                   | 1098 | 119.8 |                                                                                                                                                                                                                                                                 | 97.4  | 88.7  | 82.6  | 82.7  | 120.8 | 112.9 | 137.3 | 118.4 |
| 13324684  | Sec61b                  | 96   | 10    | Phagosome; Protein export; Protein processing in endoplasmic reticulum                                                                                                                                                                                          | 66.6  | 95.6  | 116.6 | 108.4 | 128.6 | 116.8 | 132.1 | 122.5 |
| 119392105 | As3mt                   | 376  | 41.8  |                                                                                                                                                                                                                                                                 | 119.2 | 117   | 144.3 | 136.5 | 75.2  | 87.6  | 72.1  | 90.1  |
| 31981830  | Cox7a2                  | 83   | 9.3   | Huntington's disease; Non-alcoholic fatty liver disease (NAFLD); Oxidative phosphorylation; Parkinson's disease; Alzheimer's disease; Cardiac muscle contraction                                                                                                | 106.6 | 113.8 | 103.2 | 107   | 86.1  | 87.7  | 89.2  | 88.1  |
| 6754450   | Fabp5                   | 135  | 15.1  | PPAR signaling pathway                                                                                                                                                                                                                                          | 79.1  | 86.1  | 83.9  | 88.6  | 110.9 | 109.8 | 130.7 | 128   |
| 33468993  | Dph2                    | 489  | 52.3  |                                                                                                                                                                                                                                                                 | 117.7 | 107.4 | 96.9  | 105.3 | 99.9  | 96.2  | 99    | 107.8 |
| 47059486  | Pdpx                    | 292  | 31.5  | Metabolic pathways; Vitamin B6 metabolism                                                                                                                                                                                                                       | 112   | 111   | 110   | 103.5 | 95    | 90.9  | 92.3  | 98.7  |
| 56797739  | Mlycd                   | 492  | 54.7  | Metabolic pathways; beta-Alanine metabolism; Propanoate metabolism; AMPK signaling pathway; Peroxisome                                                                                                                                                          | 121   | 131.6 | 96.3  | 112.8 | 95.4  | 98.1  | 92.1  | 92.8  |
| 6752992   | Parp2                   | 559  | 63.4  | Base excision repair; Apoptosis                                                                                                                                                                                                                                 | 109.6 | 105.4 | 90    | 85.1  | 93.4  | 97.9  | 115.2 | 116   |
| 21311849  | Gget                    | 188  | 21.2  | Glutathione metabolism                                                                                                                                                                                                                                          | 131.8 | 127.6 | 113.1 | 113.6 | 81    | 75.8  | 72.8  | 66.4  |
| 68131553  | Cnih4                   | 139  | 16.1  |                                                                                                                                                                                                                                                                 | 87.1  | 109.7 | 77    | 86.6  | 127.6 | 113.8 | 112.7 | 105.6 |
| 21314828  | Cdc26; Gm9174           | 85   | 9.8   | Progesterone-mediated oocyte maturation; Ubiquitin mediated proteolysis; HTLV-I infection; Oocyte meiosis;                                                                                                                                                      | 109.5 | 105.3 | 107   | 104.9 | 106.5 | 113.9 | 83.5  | 86.7  |
| 21312518  | Trmu                    | 417  | 47.2  | Sulfur relay system                                                                                                                                                                                                                                             | 92.6  |       | 98.5  |       | 103.1 |       | 111.2 |       |
| 305682577 | D2Wsu81e; Spout1        | 385  | 42.9  |                                                                                                                                                                                                                                                                 | 88.5  | 100.3 | 85.1  | 102.8 | 113.8 | 107.2 | 103.4 | 107.4 |
| 170650663 | Mrps11                  | 191  | 20.2  | Ribosome                                                                                                                                                                                                                                                        | 94.5  | 128.5 | 92.4  | 89.4  | 108.8 | 121.2 | 109.2 | 86.1  |
| 145587094 | 9430016H08Rik; Maip1    | 291  | 33    |                                                                                                                                                                                                                                                                 | 103   | 108.2 | 104.6 | 103.6 | 107.4 | 103.9 | 81.3  | 88.7  |
| 17505220  | Mrps21                  | 87   | 10.6  | Ribosome                                                                                                                                                                                                                                                        | 93.9  | 80.1  | 83.7  | 74.7  | 104.9 | 102.6 | 113.3 | 112.1 |
| 227430284 | 2810432D09Rik; Rpp25l   | 163  | 17.7  | Ribosome biogenesis in eukaryotes; RNA transport                                                                                                                                                                                                                | 97.1  |       | 87    |       | 100.3 |       | 101.5 |       |
| 309264229 | LOC640611; LOC102641469 | 303  | 33.8  |                                                                                                                                                                                                                                                                 | 99.6  | 100.2 | 81.7  | 82.1  | 118.1 | 112.9 | 113.3 | 114.4 |
| 45504394  | Itgb1                   | 798  | 88.2  | Leukocyte transendothelial migration; Hypertrophic cardiomyopathy (HCM); Regulation of actin cytoskeleton; Arrhythmogenic right ventricular cardiomyopathy (ARVC); Focal adhesion; Toxoplasmosis; Platelet activation; Small cell lung cancer; Dilated cardiomy | 85.4  | 81.7  | 85.4  | 80.4  | 111.5 | 126.8 | 115.4 | 126.4 |
| 30425270  | Fam78a                  | 283  | 32    |                                                                                                                                                                                                                                                                 | 116.6 | 122.2 | 105.4 | 102.9 | 94.3  | 91.5  | 85.3  | 92.1  |
| 54607016  | Rtn3                    | 964  | 103.8 | Alzheimer's disease                                                                                                                                                                                                                                             | 83    | 72.9  | 83.2  | 75.9  | 116.2 | 128.8 | 121.9 | 127   |
| 124487237 | Gltscr1; Bicra          | 1578 | 161.3 |                                                                                                                                                                                                                                                                 | 83.8  | 95.2  | 88.9  | 101.4 | 109.8 | 103.5 | 125.4 | 88.2  |
| 31982546  | Cdt1                    | 557  | 61.5  |                                                                                                                                                                                                                                                                 | 104.4 | 110.8 | 116.7 | 114.6 | 88.2  | 89.4  | 88.8  | 93.5  |

|           |          |     |      |                                                                                                                                              |       |       |       |       |       |       |       |       |
|-----------|----------|-----|------|----------------------------------------------------------------------------------------------------------------------------------------------|-------|-------|-------|-------|-------|-------|-------|-------|
| 197333728 | Isoc2a   | 206 | 22.4 |                                                                                                                                              | 117   | 120.7 | 130.9 | 122.7 | 71.3  | 72.2  | 84    | 90.3  |
| 269308215 | Mau2     | 650 | 73   |                                                                                                                                              | 100.9 | 105.5 | 98.7  | 98.3  | 97.5  | 97    | 93.5  | 93.1  |
| 7304949   | Cd2      | 344 | 38.4 | Cell adhesion molecules (CAMs), Hematopoietic cell lineage                                                                                   | 77.5  | 75.1  | 85.8  | 82.7  | 111.5 | 108.2 | 109.1 | 109.4 |
| 21312044  | Eif3k    | 218 | 25.1 |                                                                                                                                              | 111.8 | 104.2 | 91.7  | 89.4  | 114.1 | 119.6 | 96.4  | 96.1  |
| 31541947  | Fytd1    | 317 | 35.9 |                                                                                                                                              | 88    | 93.6  | 109.9 | 109.4 | 111.5 | 102   | 89.5  | 96.1  |
| 86604724  | Atf1     | 269 | 29.2 | HTLV-I infection; Transcriptional misregulation in cancer; Aldosterone synthesis and secretion                                               | 105.6 | 106.7 | 112.8 | 97.3  | 107.3 | 102.5 | 59.2  | 88.4  |
| 119392070 | Cog3     | 828 | 94.1 |                                                                                                                                              | 97.9  | 105.1 | 95.3  | 93.2  | 115   | 98.3  | 99.7  | 94.7  |
| 124248552 | Ash2l    | 623 | 68.2 |                                                                                                                                              | 102   | 101.2 | 103.1 | 101.4 | 99.1  | 100   | 91.7  | 84    |
| 157364966 | Otud6b   | 325 | 37.2 |                                                                                                                                              | 113.7 | 117.1 | 90.1  | 92.5  | 105.5 | 96.1  | 89.7  | 97.2  |
| 6678175   | Sts      | 624 | 66.5 | Steroid hormone biosynthesis                                                                                                                 | 106.9 | 98.2  | 80.8  | 84.5  | 107.1 | 111.5 | 105.3 | 105   |
| 148368964 | Mrpl48   | 211 | 24   |                                                                                                                                              | 103.1 | 111   | 85.1  | 71.1  | 108.8 | 109.7 | 109.1 | 112.7 |
| 21704148  | Mob1a    | 216 | 25.1 | Hippo signaling pathway; Hippo signaling pathway - multiple species                                                                          | 121.2 | 118.6 | 128   | 132.6 | 71.1  | 79.4  | 82.1  | 79.3  |
| 9790019   | Asah1    | 394 | 44.6 | Metabolic pathways; Lysosome; Sphingolipid signaling pathway; Sphingolipid metabolism                                                        | 192   | 228.1 | 166.3 | 181.4 | 65.8  | 60.8  | 72    | 59.2  |
| 124487421 | Trmt2a   | 613 | 67.6 |                                                                                                                                              | 94.5  | 90.8  | 83.7  | 83.6  | 122   | 115.6 | 122.2 | 122.2 |
| 6678499   | Ugdh     | 493 | 54.8 | Metabolic pathways; Amino sugar and nucleotide sugar metabolism; Ascorbate and aldarate metabolism; Pentose and glucuronate interconversions | 98.8  | 78.2  | 62.1  | 96.1  | 72.2  | 143.4 | 60    | 131.7 |
| 46195809  | Pptc7    | 310 | 33   |                                                                                                                                              | 139.1 |       | 106.5 |       | 105.5 |       | 86.2  |       |
| 109809751 | Anapc5   | 740 | 83   | Progesterone-mediated oocyte maturation; Ubiquitin mediated proteolysis; HTLV-I infection; Oocyte meiosis;                                   | 87.8  | 92.5  | 91.8  | 91.6  | 112.5 | 104.3 | 111.4 | 110.4 |
| 254939663 | Senp3    | 568 | 64.4 |                                                                                                                                              | 81.9  | 82.2  | 98    | 85.1  | 130.3 | 120.9 | 110.1 | 90.2  |
| 52421794  | Pcbd2    | 136 | 14.8 |                                                                                                                                              | 103.4 | 105.5 | 111.1 | 108.8 | 97.2  | 98.6  | 104.1 | 102.5 |
| 34328195  | Ptpn12   | 775 | 86.5 |                                                                                                                                              | 105.6 | 97.2  | 111.2 | 91.7  | 94.4  | 104.3 | 79    | 86.5  |
| 6753316   | Ccnt1    | 724 | 80.5 | Transcriptional misregulation in cancer                                                                                                      | 95    | 94.6  | 93.8  | 95    | 108.1 | 123   | 104.2 | 93.9  |
| 72384361  | Gsk3a    | 490 | 51.6 | Dopaminergic synapse; Chemokine signaling pathway; Non-alcoholic fatty liver disease (NAFLD)                                                 | 104.9 | 128.7 | 92.4  | 90.5  | 89.8  | 110.5 | 115.5 | 102.8 |
| 257900524 | Mpp6     | 553 | 62.6 |                                                                                                                                              | 97.1  | 81.1  | 84.1  | 79.1  | 123.7 | 124.5 | 105.7 | 111.4 |
| 161086984 | Ap2s1    | 142 | 17   | Endocytosis; Endocrine and other factor-regulated calcium reabsorption; Huntington's disease; Synaptic vesicle cycle                         | 101.6 | 103.3 | 95.6  | 83.1  | 103.4 | 77.9  | 97.9  | 77    |
| 6678437   | Tpt1     | 172 | 19.5 |                                                                                                                                              | 81.1  | 84    | 107.2 | 114.5 | 119.8 | 122.6 | 113.1 | 116.8 |
| 27228982  | Mrps23   | 177 | 20.3 |                                                                                                                                              | 97.5  | 105.8 | 85.5  | 90.4  | 118.3 | 115.9 | 111   | 101.9 |
| 260763900 | Ptges2   | 384 | 43.3 | Metabolic pathways; Arachidonic acid metabolism                                                                                              | 111.9 | 107.1 | 98.4  | 106.9 | 111.3 | 104   | 97.6  | 96.4  |
| 33859624  | S100a4   | 101 | 11.7 |                                                                                                                                              | 128.6 | 247.6 | 79.8  | 141.8 | 41.3  | 42.2  | 39.9  | 35.4  |
| 71480098  | Pcnp     | 178 | 19   |                                                                                                                                              | 114.7 | 121.2 | 113.2 | 107.3 | 91.2  | 84.5  | 108.2 | 110   |
| 260763928 | Anapc2   | 837 | 95.2 | Progesterone-mediated oocyte maturation; Ubiquitin mediated proteolysis; HTLV-I infection; Oocyte meiosis;                                   | 94.5  | 96.3  | 94.4  | 95.3  | 105.8 | 106.3 | 107.7 | 106.6 |
| 208431789 | AI837181 | 298 | 31.8 |                                                                                                                                              | 146.6 | 135   | 107.6 | 113.2 | 97.9  | 94.6  | 78.2  | 77.8  |
| 21311875  | Urm1     | 101 | 11.3 | Sulfur relay system                                                                                                                          | 111.9 | 119.4 | 104   | 111   | 105   | 99.4  | 87.5  | 87.7  |

|           |                              |      |       |                                                                                                               |       |       |       |       |       |       |       |       |
|-----------|------------------------------|------|-------|---------------------------------------------------------------------------------------------------------------|-------|-------|-------|-------|-------|-------|-------|-------|
| 153792166 | Gemin2;<br>Sip1              | 269  | 30.4  | RNA transport                                                                                                 | 86.3  |       | 133.6 |       | 110.4 |       | 114.5 |       |
| 61675696  | Alkbh8                       | 664  | 74.7  |                                                                                                               | 103.1 | 95.5  | 102   | 111.1 | 102.9 | 103.7 | 95.5  | 99    |
| 229608908 | I190005F<br>20Rik;<br>Trmt11 | 728  | 80.9  |                                                                                                               | 92.5  | 101.3 | 99.5  | 99.4  | 109.8 | 107.9 | 108.4 | 108.6 |
| 6677995   | Slc16a1                      | 493  | 53.2  |                                                                                                               | 72.1  | 73.6  | 82.4  | 85.3  | 133.6 | 129.2 | 114.8 | 116.7 |
| 171460954 | Ubl7                         | 380  | 40.4  |                                                                                                               | 93.1  | 96.6  | 96.3  | 95.9  | 105.4 | 104.1 | 103.6 | 104.7 |
| 161484660 | Cpox                         | 443  | 49.7  | Metabolic pathways; Porphyrin and chlorophyll metabolism                                                      | 97.5  | 103.7 | 98.9  | 97.8  | 86.3  | 89.3  | 88.8  | 80.8  |
| 269973931 | Fhod1                        | 1197 | 129.5 |                                                                                                               | 115.3 | 97.8  | 92.7  | 102.3 | 90.6  | 101.9 | 108.4 | 101   |
| 20149314  | Tada3                        | 432  | 48.9  |                                                                                                               | 99.5  |       | 102.9 |       | 107.9 |       | 101.9 |       |
| 13386060  | Txndc17                      | 123  | 14    |                                                                                                               | 126.1 | 124.4 | 115.4 | 111.2 | 73    | 74.9  | 100.8 | 97.3  |
| 255308888 | Nme3                         | 169  | 19.1  | Metabolic pathways; Purine metabolism; Pyrimidine metabolism                                                  | 108.9 | 113   | 106.6 | 109.3 | 84.9  | 89.2  | 82.8  | 83.9  |
| 21313034  | Ccdc53;<br>Washc3            | 194  | 21.1  | Endocytosis                                                                                                   | 101.7 | 97.9  | 99.2  | 88.9  | 99.7  | 98.1  | 92.4  | 105.6 |
| 7949005   | Atp5j                        | 108  | 12.5  | Metabolic pathways; Huntington's disease; Oxidative phosphorylation; Parkinson's disease; Alzheimer's disease | 95    | 92.9  | 99.9  | 104.4 | 103.6 | 105.2 | 118.4 | 115.7 |
| 160707990 | Ctsc                         | 462  | 52.3  | Lysosome; Apoptosis                                                                                           | 124.4 | 128.8 | 125.3 | 121.8 | 79.3  | 79.7  | 86.6  | 95.8  |
| 124487333 | Ppig                         | 752  | 88.3  |                                                                                                               | 95.9  | 97.9  | 93.3  | 92.4  | 102.6 | 95.8  | 106.2 | 104.1 |
| 197927225 | Setd2                        | 2537 | 285.5 | Lysine degradation                                                                                            | 100.8 | 114.2 | 95    | 102.4 | 105.6 | 99.2  | 103.3 | 77.4  |
| 22122459  | Bud13                        | 637  | 72.1  |                                                                                                               | 108.9 | 109.9 | 109.6 | 107.4 | 96.2  | 98.4  | 104.3 | 97.2  |
| 226437629 | Emb                          | 330  | 37    |                                                                                                               | 94.4  | 87.5  | 81.8  | 79.3  | 107.2 | 106.3 | 119   | 121.1 |
| 31542139  | Arfgap1                      | 414  | 45.3  | Endocytosis                                                                                                   | 102.1 | 108.8 | 100   | 94.1  | 86.6  | 92.9  | 105   | 112.4 |
| 30725770  | Wdr92                        | 357  | 39.8  |                                                                                                               | 101.3 | 125.2 | 85    | 88.1  | 108.6 | 112   | 131.7 | 117.3 |
| 225637492 | Fam98c                       | 344  | 37.2  |                                                                                                               | 133.9 | 108.6 | 89.4  | 86.7  | 92.7  | 93    | 90.2  | 96.2  |
| 11496255  | Dnaja4                       | 397  | 44.9  |                                                                                                               | 103.3 | 98.8  | 108.4 | 105.5 | 96.8  | 107.9 | 97.6  | 107.1 |
| 21644577  | Abhd11                       | 307  | 33.5  |                                                                                                               | 110.7 | 118.4 | 109.1 | 105.9 | 104.6 | 99.6  | 92.1  | 97.8  |
| 61651673  | Stt3b                        | 823  | 93.3  | Metabolic pathways; N-Glycan biosynthesis; Protein processing in endoplasmic reticulum                        | 85.2  | 77.4  | 90.2  | 88.8  | 116.1 | 128   | 123.7 | 121.9 |
| 194353999 | Hdac6                        | 1149 | 125.7 | Alcoholism; Viral carcinogenesis                                                                              | 103.4 | 98.4  | 88.6  | 83.8  | 104   | 119.8 | 107.2 | 114.6 |
| 21703838  | Ube2d1                       | 147  | 16.6  | Ubiquitin mediated proteolysis; Protein processing in endoplasmic reticulum                                   | 104.2 | 109.9 | 112.3 | 107.6 | 86.9  | 78.8  | 87.1  | 83.8  |
| 17975504  | Bag4                         | 457  | 49.1  | TNF signaling pathway                                                                                         | 111.8 | 95.3  | 111.1 | 99.3  | 98.6  | 99    | 108.2 | 109   |
| 240255614 | Pank4                        | 773  | 86.3  |                                                                                                               | 101.9 | 105   | 106.7 | 118.5 | 94.3  | 92.5  | 96.2  | 89.9  |
| 254692966 | Nlrc5                        | 1915 | 211.6 |                                                                                                               | 125.8 | 115.7 | 112.1 | 105.2 | 90.3  | 106.7 | 98.4  | 85.1  |
| 33469019  | Prkrir;<br>Thap12            | 758  | 87    |                                                                                                               | 102.2 | 106.6 | 91.1  | 89.9  | 101   | 100.9 | 110.2 | 109.3 |
| 21359827  | Chmp7                        | 451  | 50.6  | Endocytosis                                                                                                   | 91.7  | 98.2  | 106.4 | 104.8 | 106.1 | 105.2 | 102.1 | 111.5 |
| 119372296 | Pcid2                        | 399  | 46.1  |                                                                                                               | 98    | 102.5 | 100.9 | 97.4  | 93.4  | 106.9 | 97.3  | 105.2 |
| 58037095  | Spryd4                       | 207  | 23.3  |                                                                                                               | 95.1  | 111.7 | 128.8 | 107.6 | 119.7 | 97.1  | 101.3 | 99.3  |
| 84042525  | Ctsa                         | 492  | 55.7  |                                                                                                               | 131.5 | 185.3 | 139.7 | 116.1 | 81.9  | 80.3  | 61.1  | 53.7  |



|           |                               |      |       |                                                                                                                                                                                      |       |       |       |       |       |       |       |       |
|-----------|-------------------------------|------|-------|--------------------------------------------------------------------------------------------------------------------------------------------------------------------------------------|-------|-------|-------|-------|-------|-------|-------|-------|
| 30519921  | Mrpl50                        | 159  | 18.2  |                                                                                                                                                                                      | 97.7  | 99    | 99.4  | 92.2  | 102.2 | 100.8 | 120.1 | 101.2 |
| 169234740 | 6720456H<br>20Rik;<br>Tmem260 | 703  | 78.9  |                                                                                                                                                                                      | 99.3  | 97.8  | 79.9  | 80    | 114.7 | 111.1 | 102.5 | 101.9 |
| 46575895  | Ublcp1                        | 318  | 36.8  |                                                                                                                                                                                      | 115.2 | 114.9 | 110.2 | 106.8 | 83.8  | 81.8  | 91.4  | 81.2  |
| 21313210  | Tmx2                          | 295  | 33.9  |                                                                                                                                                                                      | 102.5 | 99.1  | 96.3  | 91.1  | 112.6 | 115.2 | 95    | 101.8 |
| 255683411 | Fbx18                         | 374  | 41.1  |                                                                                                                                                                                      | 98.3  | 120   | 97.6  | 111.9 | 99.7  | 88.4  | 94.6  | 77.3  |
| 124249228 | Sla2                          | 259  | 28.5  |                                                                                                                                                                                      | 106.1 | 134   | 95.4  | 95    | 105.9 | 81.2  | 94.1  | 94.5  |
| 110625902 | Napg                          | 312  | 34.7  |                                                                                                                                                                                      | 117.8 | 110.3 | 125.5 | 113.2 | 85.4  | 82.9  | 84.6  | 88.3  |
| 158966667 | Rab3gap1                      | 981  | 110.1 |                                                                                                                                                                                      | 102.7 | 106.9 | 89.6  | 100.4 | 101.5 | 99    | 87.1  | 93.4  |
| 88759354  | Glyctk                        | 523  | 55.3  | Metabolic pathways; Glycine, serine and threonine metabolism; Pentose phosphate pathway; Carbon metabolism; Glycerolipid metabolism; Glyoxylate and dicarboxylate metabolism         | 117   | 124.4 | 79.7  | 93.2  | 90.1  | 101.7 | 100.6 | 90.9  |
| 187960092 | Ogg1                          | 345  | 38.9  | Base excision repair                                                                                                                                                                 | 117.4 | 112.3 | 105.2 | 101.8 | 104.8 | 104.6 | 82.1  | 88.3  |
| 116812875 | Secisbp2                      | 858  | 94.8  |                                                                                                                                                                                      | 111.2 | 98.4  | 103.8 | 103.5 | 98    | 95.2  | 121.1 | 109.6 |
| 62243808  | Dopey2                        | 2295 | 257.3 |                                                                                                                                                                                      | 95.8  | 102.7 | 98.3  | 95    | 103.3 | 103.3 | 96.6  | 94.5  |
| 23956182  | Anapc4                        | 807  | 91.6  | Progesterone-mediated oocyte maturation; Ubiquitin mediated proteolysis; HTLV-I infection; Oocyte meiosis;                                                                           | 95.5  | 90.2  | 86.2  | 89.8  | 109.4 | 116.8 | 102.3 | 105.2 |
| 21312790  | Kat8                          | 458  | 52.5  |                                                                                                                                                                                      | 113.8 | 112.5 | 102.7 | 89.3  | 86.2  | 94.6  | 94.2  | 89.5  |
| 46909579  | Gyk; Gk                       | 553  | 60.5  |                                                                                                                                                                                      | 99.4  | 102.1 | 89.6  | 92.2  | 109.7 | 114.4 | 113.1 | 117.4 |
| 213021192 | Mios                          | 875  | 98.3  | mTOR signaling pathway                                                                                                                                                               | 101.1 | 101.6 | 99.1  | 95.8  | 104.8 | 111.6 | 93.6  | 98.2  |
| 270288742 | Phf14                         | 941  | 105.9 |                                                                                                                                                                                      | 103.6 | 97    | 101.2 | 101.7 | 94    | 107.6 | 104.2 | 97    |
| 21312189  | Iscal                         | 129  | 14.2  |                                                                                                                                                                                      | 101.5 | 107.4 | 97.3  | 97.6  | 106.3 | 94.7  | 111.4 | 111.5 |
| 51317394  | Aurkb                         | 345  | 39.4  |                                                                                                                                                                                      | 73.9  |       | 64.8  |       | 151.7 |       | 146.7 |       |
| 40254356  | Tmem209                       | 561  | 62.9  |                                                                                                                                                                                      | 95.7  |       | 97.9  |       | 106.1 |       | 100.7 |       |
| 30424609  | Ythdf1                        | 559  | 60.8  |                                                                                                                                                                                      |       | 90.1  |       | 116.3 |       | 117.3 |       | 89.4  |
| 165932350 | Cutc                          | 272  | 29    |                                                                                                                                                                                      | 123.6 | 112.2 | 120.5 | 113.4 | 83.4  | 88    | 86.4  | 93.7  |
| 85362708  | 2310036O<br>22Rik;            | 173  | 18.4  |                                                                                                                                                                                      | 104.6 | 109   | 121.7 | 118.6 | 92    | 89.8  | 92.3  | 87.4  |
| 13385260  | Acot13                        | 140  | 15.2  |                                                                                                                                                                                      | 112.6 | 107.7 | 106.9 | 98.2  | 87    | 97.2  | 96.2  | 102.3 |
| 149268895 | Rpl34-<br>ps1;<br>Rpl34;      | 117  | 13.3  | Ribosome                                                                                                                                                                             | 77.5  | 75.7  | 88    | 86.9  | 118.9 | 128.7 | 121.5 | 122.5 |
| 194394227 | Tbrg4                         | 630  | 71.5  |                                                                                                                                                                                      | 97.2  | 109.5 | 95.9  | 91.7  | 103.6 | 116.4 | 110.1 | 94.3  |
| 56605992  | SImap                         | 821  | 94.3  |                                                                                                                                                                                      | 114.6 | 110.7 | 105.6 | 110.2 | 107   | 100.6 | 70.5  | 86.1  |
| 9789907   | Stub1                         | 304  | 34.9  | Ubiquitin mediated proteolysis; Protein processing in endoplasmic reticulum                                                                                                          | 85.4  |       | 90.1  |       | 119.8 |       | 118   |       |
| 16716343  | Cox6c                         | 76   | 8.5   | Metabolic pathways; Huntington's disease; Non-alcoholic fatty liver disease (NAFLD); Oxidative phosphorylation; Parkinson's disease; Alzheimer's disease; Cardiac muscle contraction | 86.6  | 76.2  | 129.5 | 132.5 | 117.6 | 116.8 | 85.6  | 80.9  |

|           |                     |      |       |                                                                                                                                                                                                                                                                       |       |       |       |       |       |       |       |       |
|-----------|---------------------|------|-------|-----------------------------------------------------------------------------------------------------------------------------------------------------------------------------------------------------------------------------------------------------------------------|-------|-------|-------|-------|-------|-------|-------|-------|
| 224994273 | Tlk1                | 766  | 86.6  |                                                                                                                                                                                                                                                                       | 64.9  | 92.8  | 96.5  | 95.9  | 111.5 | 98.4  | 125.4 | 117.6 |
| 312222675 | Golga5              | 729  | 82.3  |                                                                                                                                                                                                                                                                       |       | 94.3  |       | 122.3 |       | 125.1 |       | 93.8  |
| 158749551 | Nxt1                | 140  | 15.8  | mRNA surveillance pathway; Ribosome biogenesis in eukaryotes; Influenza A; RNA transport                                                                                                                                                                              | 97.3  | 91.2  | 98.6  | 105.3 | 98.1  | 93.2  | 86.8  | 89.8  |
| 83921633  | Traf2               | 501  | 56    | Herpes simplex infection; MAPK signaling pathway; TNF signaling pathway; NOD-like receptor signaling pathway; Epstein-Barr virus infection; RIG-I-like receptor signaling pathway; Small cell lung cancer; Osteoclast differentiation; Sphingolipid signaling pathway | 97.9  | 105.4 | 104.5 | 93.9  | 92.4  | 94.9  | 108.7 | 100.1 |
| 111955302 | Bak1                | 209  | 23.3  | Platinum drug resistance; MicroRNAs in cancer; Apoptosis - multiple species; Protein processing in endoplasmic reticulum; Viral carcinogenesis; Apoptosis                                                                                                             | 102.6 | 92    | 109.7 | 113.5 | 103.8 | 106.1 | 92.8  | 92.3  |
| 39930441  | 2210016L<br>21Rik   | 256  | 27.6  |                                                                                                                                                                                                                                                                       | 108.4 |       | 95.6  |       | 102.7 |       | 89.5  |       |
| 124487123 | BC057079<br>; Focad | 1798 | 198.8 |                                                                                                                                                                                                                                                                       | 110.4 | 105.5 | 103   | 100.8 | 102.1 | 100.9 | 104.6 | 113   |
| 31542228  | Bid                 | 195  | 21.9  | Platinum drug resistance; p53 signaling pathway; Amyotrophic lateral sclerosis (ALS); Tuberculosis; Sphingolipid signaling pathway; Apoptosis - multiple species; Non-alcoholic fatty liver disease (NAFLD); Pathways in cancer: Alzheimer's disease; Viral myo       | 112.1 | 123.8 | 103.6 | 113.2 | 90.4  | 83.3  | 103.2 | 95.8  |
| 19527056  | Clp1                | 425  | 47.7  | mRNA surveillance pathway                                                                                                                                                                                                                                             | 90.6  | 97.9  | 98.6  | 99.9  | 106.2 | 99.3  | 91.5  | 97.6  |
| 237820655 | Hbxip;<br>Lamtor5   | 145  | 15.3  | mTOR signaling pathway; Hepatitis B                                                                                                                                                                                                                                   | 137.7 | 137.2 | 102.9 | 94.8  | 94    | 92.7  | 93.8  | 106.1 |
| 254692952 | Setdb1              | 1308 | 144.5 | Lysine degradation; Signaling pathways regulating pluripotency of stem cells                                                                                                                                                                                          | 112.9 | 113.3 | 92.1  | 91.2  | 108.3 | 102.4 | 99.5  | 97.8  |
| 84781727  | Kif5a               | 1027 | 116.9 | Endocytosis; Dopaminergic synapse                                                                                                                                                                                                                                     | 85.3  |       | 84.6  |       | 108.4 |       | 116.7 |       |
| 226693369 | Gaa                 | 953  | 106.2 | Metabolic pathways; Lysosome; Starch and sucrose metabolism; Galactose metabolism                                                                                                                                                                                     | 111   | 105.2 | 114.1 | 101.9 | 114.7 | 136.4 | 103.3 | 106.8 |
| 6679339   | Pitpnm1             | 1243 | 134.9 |                                                                                                                                                                                                                                                                       | 129.3 | 117.7 | 118.2 | 115   | 85.7  | 95.5  | 70.9  | 67.4  |
| 22165347  | Eif1                | 113  | 12.7  | RNA transport                                                                                                                                                                                                                                                         | 99.5  | 98.6  | 88.3  | 91    | 103.1 | 97.8  | 130.9 | 122.2 |
| 58037409  | Phpt1               | 124  | 14    |                                                                                                                                                                                                                                                                       | 122.5 | 119.6 | 115.7 | 112.4 | 79.4  | 83.2  | 80.9  | 75.8  |
| 140972309 | Ndufv3              | 468  | 50.5  |                                                                                                                                                                                                                                                                       | 105.4 | 110.1 | 133.2 | 96.2  | 90.8  | 95.9  | 87.3  | 99.2  |
| 13385950  | Fam32a              | 112  | 13.2  |                                                                                                                                                                                                                                                                       | 112.9 | 113.4 | 115.9 | 112   | 85.3  | 82.1  | 86.4  | 90.6  |
| 20270210  | Kti12               | 351  | 38.4  |                                                                                                                                                                                                                                                                       | 104.4 | 96.8  | 83.2  | 102.5 | 101.7 | 113   | 105.8 | 103.7 |
| 125988405 | Wbscr22;<br>Bud23   | 281  | 31.6  |                                                                                                                                                                                                                                                                       | 105.4 | 138.8 | 103.8 | 109.4 | 101.5 | 82.2  | 77.4  | 102   |
| 6680908   | Cdk5                | 292  | 33.3  | Axon guidance; Cocaine addiction; Alzheimer's disease                                                                                                                                                                                                                 | 109.4 | 110.2 | 100.4 | 97.2  | 105.5 | 98.5  | 115.2 | 107.3 |
| 119360344 | Gramd1a             | 722  | 80.6  |                                                                                                                                                                                                                                                                       | 100.2 | 102.4 | 99.1  | 102.5 | 93.3  | 89.8  | 96.9  | 88.2  |
| 21311925  | Ampd2               | 798  | 92    | Metabolic pathways; Purine metabolism                                                                                                                                                                                                                                 | 96.6  |       | 94.8  |       | 107.6 |       | 114.2 |       |
| 126362979 | Dgcr14              | 480  | 52.6  |                                                                                                                                                                                                                                                                       | 107.5 | 95.8  | 92.5  | 92.5  | 104.2 | 110.9 | 133.3 | 114   |
| 167614490 | Tbc1d10b            | 798  | 87.2  |                                                                                                                                                                                                                                                                       | 97.2  | 93.2  | 88.7  | 93.9  | 90    | 102.8 | 109.8 | 97.2  |
| 150378458 | Adam10              | 749  | 83.9  | Alzheimer's disease                                                                                                                                                                                                                                                   | 86.6  | 89.1  | 88.9  | 89.7  | 125.9 | 114.1 | 106.8 | 100.5 |

|           |                     |      |       |                                                                                                                                                                                                                                                                 |       |       |       |       |       |       |       |       |
|-----------|---------------------|------|-------|-----------------------------------------------------------------------------------------------------------------------------------------------------------------------------------------------------------------------------------------------------------------|-------|-------|-------|-------|-------|-------|-------|-------|
| 254281282 | Anapc7              | 565  | 63    | Progesterone-mediated oocyte maturation; Ubiquitin mediated proteolysis; HTLV-I infection; Oocyte meiosis;                                                                                                                                                      | 112.6 | 101.5 | 94.1  | 96.5  | 112.9 | 108.2 | 100   | 102.3 |
| 6680850   | Casp7               | 303  | 34    | TNF signaling pathway; Apoptosis - multiple species; Non-alcoholic fatty liver disease (NAFLD); Pertussis; Legionellosis; Alzheimer's disease; Apoptosis                                                                                                        | 106.7 | 108.9 | 95    | 85.1  | 113.6 | 114.1 | 121.1 | 122.3 |
| 295389521 | Ncaph               | 731  | 82.3  |                                                                                                                                                                                                                                                                 | 80.9  | 83.7  | 61.6  | 83.3  | 134   | 132.3 | 133.2 | 119.1 |
| 21704162  | Ube2m               | 183  | 20.9  | Ubiquitin mediated proteolysis                                                                                                                                                                                                                                  | 103.6 | 105.7 | 101   | 103.5 | 93.7  | 83.8  | 104.9 | 93.9  |
| 166998470 | Shq1                | 569  | 63.4  |                                                                                                                                                                                                                                                                 |       | 89.4  |       | 91    |       | 98.9  |       | 128.8 |
| 21553309  | Apoa1bp;<br>Naxe    | 282  | 31    |                                                                                                                                                                                                                                                                 | 109.6 | 119.9 | 111.3 | 114.4 | 93.7  | 87.6  | 93.6  | 95.1  |
| 21362303  | Snap47              | 413  | 46.5  |                                                                                                                                                                                                                                                                 | 88.3  | 96.9  | 107   | 90.9  | 109.1 | 108   | 110.5 | 124.1 |
| 161016826 | Reep5               | 189  | 21.4  |                                                                                                                                                                                                                                                                 | 94.2  | 98.7  | 85.2  | 91.9  | 92.2  | 100.4 | 116   | 120.3 |
| 110347471 | Apaf1               | 1249 | 140.9 | Platinum drug resistance; p53 signaling pathway; Amyotrophic lateral sclerosis (ALS); Small cell lung cancer; Tuberculosis; Hepatitis B; Huntington's disease; Apoptosis - multiple species; Parkinson's disease; Legionellosis; Alzheimer's disease; Apoptosis | 109.8 | 108.3 | 103   | 111.2 | 93.5  | 101.5 | 104.8 | 90.2  |
| 30425078  | Rdh13               | 334  | 36.4  |                                                                                                                                                                                                                                                                 | 108.2 | 95.5  | 96.7  | 103.7 | 97    | 99.6  | 114.7 | 109.6 |
| 126517505 | Kcmfl               | 381  | 41.8  |                                                                                                                                                                                                                                                                 | 127.7 | 144.2 | 96.7  | 92.5  | 96.7  | 92    | 79.8  | 82.3  |
| 84794548  | Uap1l1              | 507  | 56.6  | Metabolic pathways; Amino sugar and nucleotide sugar metabolism                                                                                                                                                                                                 | 108.6 | 102   | 102.7 | 87.3  | 111.3 | 131   | 93.6  | 96.4  |
| 13878227  | Wdr6                | 1125 | 121.8 |                                                                                                                                                                                                                                                                 | 96.1  | 95.4  | 89.1  | 90.2  | 109   | 117.1 | 107.4 | 108.5 |
| 30519913  | Commd8              | 183  | 20.8  |                                                                                                                                                                                                                                                                 | 99.7  | 107.5 | 102.8 | 90.9  | 100.1 | 100.8 | 103.4 | 86.7  |
| 114326554 | Itga4               | 1032 | 115   | Leukocyte transendothelial migration; Hypertrophic cardiomyopathy (HCM); Regulation of actin cytoskeleton; Arrhythmogenic right ventricular cardiomyopathy (ARVC); Focal adhesion; Dilated cardiomyopathy; Cell adhesion molecules (CAMs); Intestinal immune ne | 96.5  | 102.4 | 108   | 106.7 | 97    | 102.9 | 95    | 93.5  |
| 164698436 | Ccdc117             | 277  | 30.4  |                                                                                                                                                                                                                                                                 | 96.2  | 110   | 105.3 | 94.9  | 102.9 | 107.4 | 101.9 | 99.1  |
| 164607150 | Dyrk1a              | 763  | 85.4  |                                                                                                                                                                                                                                                                 | 106.8 | 107.7 | 101.4 | 101.9 | 100   | 101.4 | 103.2 | 97.9  |
| 13384742  | Mrps36              | 102  | 11.1  |                                                                                                                                                                                                                                                                 | 107.1 | 99    | 95    | 107.2 | 96.4  | 94.6  | 127.7 | 121.2 |
| 46402175  | Lpcat4              | 524  | 57.1  | Metabolic pathways; Ether lipid metabolism; Glycerophospholipid metabolism                                                                                                                                                                                      | 97    | 106.2 | 97    | 105.7 | 101   | 100.9 | 99.2  | 95.2  |
| 166235886 | Ctse                | 397  | 42.9  | Lysosome                                                                                                                                                                                                                                                        | 96.3  | 103.8 | 115.8 | 119.2 | 94.7  | 88.6  | 92.7  | 81.4  |
| 6680606   | Krt19               | 403  | 44.5  |                                                                                                                                                                                                                                                                 | 65.9  | 62.9  | 64.5  | 59.9  | 172.5 | 224.1 | 65    | 61.4  |
| 124248548 | Fam134a;<br>Retreg2 | 541  | 57.5  |                                                                                                                                                                                                                                                                 | 90.4  | 95.4  | 84.1  | 104   | 113.1 | 109.7 | 111.6 | 126   |
| 160333185 | Mipep               | 711  | 80.8  |                                                                                                                                                                                                                                                                 | 93.4  | 90.1  | 92    | 90.7  | 121.5 | 123.5 | 108.3 | 114.3 |
| 119672920 | Mepce               | 666  | 72    |                                                                                                                                                                                                                                                                 | 114   | 100   | 107.7 | 104   | 90.5  | 93.2  | 98.4  | 106.8 |
| 124486867 | Vma21               | 101  | 11.4  |                                                                                                                                                                                                                                                                 | 106.6 | 102.8 | 97.3  | 94.2  | 99.2  | 99.5  | 90.1  | 91.7  |
| 26986557  | Eif2b5              | 717  | 80    | RNA transport                                                                                                                                                                                                                                                   | 93.7  | 97.3  | 89.4  | 95.6  | 112.7 | 112.4 | 108   | 103.2 |
| 157816935 | Cdk12               | 1484 | 163.6 |                                                                                                                                                                                                                                                                 | 101.7 | 90.5  | 94.4  | 104.8 | 94.7  | 99.9  | 104   | 110.6 |

|           |                               |      |       |                                                                                                                                                                                                                                                                   |       |       |       |       |       |       |       |       |
|-----------|-------------------------------|------|-------|-------------------------------------------------------------------------------------------------------------------------------------------------------------------------------------------------------------------------------------------------------------------|-------|-------|-------|-------|-------|-------|-------|-------|
| 21389311  | Icam1                         | 537  | 58.8  | Leukocyte transendothelial migration; AGE-RAGE signaling pathway in diabetic complications; Staphylococcus aureus infection; Rheumatoid arthritis; TNF signaling pathway; African trypanosomiasis; Epstein-Barr virus infection; Cell adhesion molecules (CAMs)   | 85.9  | 90.7  | 74.9  | 78.2  | 132.1 | 123.7 | 110.3 | 108   |
| 89242146  | Npc1                          | 1277 | 142.8 | Lysosome                                                                                                                                                                                                                                                          | 108   | 108   | 96.1  | 103   | 99.2  | 99.9  | 111.5 | 97.1  |
| 21312986  | Ears2                         | 523  | 58.3  | Metabolic pathways; Aminoacyl-tRNA biosynthesis; Porphyrin and chlorophyll metabolism                                                                                                                                                                             | 120.6 | 117.8 | 116.9 | 123.7 | 94.3  | 101.4 | 87.5  | 96.1  |
| 21539585  | Uqcrcq                        | 82   | 9.8   | Metabolic pathways; Huntington's disease; Non-alcoholic fatty liver disease (NAFLD); Oxidative phosphorylation; Parkinson's disease; Alzheimer's disease; Cardiac muscle contraction                                                                              | 109.3 | 120.4 | 97.1  | 110.8 | 73.6  | 87.3  | 87.1  | 82.8  |
| 27532955  | Rpe                           | 228  | 24.9  | Metabolic pathways; Biosynthesis of amino acids; Pentose phosphate pathway; Carbon metabolism; Pentose and glucuronate interconversions                                                                                                                           | 114.4 | 108.5 | 111.4 | 106.4 | 83.8  | 91    | 90.3  | 103.9 |
| 21312800  | 5033414D<br>02Rik;<br>Plorkt  | 147  | 17.3  |                                                                                                                                                                                                                                                                   | 80    | 82.3  | 78.4  | 77.3  | 111.9 | 116.4 | 117.7 | 116.3 |
| 34538602  | ATP8                          | 67   | 7.8   | Metabolic pathways; Huntington's disease; Oxidative phosphorylation; Parkinson's disease; Alzheimer's disease                                                                                                                                                     | 104.8 | 133.7 | 102.3 | 99.6  | 123.3 | 179.6 | 87.2  | 80.8  |
| 21450063  | Senp1                         | 640  | 72.5  |                                                                                                                                                                                                                                                                   | 103.2 | 98.7  | 103.6 | 96    | 100.1 | 94.9  | 101   | 102.9 |
| 116268115 | Auh                           | 314  | 33.3  | Valine, leucine and isoleucine degradation; Metabolic pathways                                                                                                                                                                                                    | 121.7 | 124.6 | 108.8 | 105.8 | 90.8  | 86.6  | 84.7  | 83.9  |
| 23956194  | Arl8a                         | 186  | 21.4  |                                                                                                                                                                                                                                                                   | 108   |       | 104.9 |       | 103.6 |       | 79.8  |       |
| 6671497   | Abcd1                         | 736  | 81.8  | ABC transporters; Peroxisome                                                                                                                                                                                                                                      | 96    | 121.7 | 109.4 | 93.5  | 93.3  | 92.8  | 97.8  | 100.2 |
| 71773829  | Trip4                         | 581  | 66.2  |                                                                                                                                                                                                                                                                   | 101.9 | 104.8 | 99    | 89.3  | 112   | 113.8 | 99.6  | 108.8 |
| 50399860  | Dbr1                          | 550  | 62.3  |                                                                                                                                                                                                                                                                   | 83.8  | 96.2  | 108.6 | 104.7 | 114.3 | 103   | 96.9  | 104.9 |
| 21312012  | Ndufa8                        | 172  | 20    | Metabolic pathways; Huntington's disease; Non-alcoholic fatty liver disease (NAFLD); Oxidative phosphorylation; Parkinson's disease; Alzheimer's disease                                                                                                          | 101   | 99.1  | 103.2 | 108.1 | 92.7  | 102   | 107   | 99.8  |
| 165932364 | Cmss1                         | 276  | 31.6  |                                                                                                                                                                                                                                                                   | 100.8 | 94.2  | 111.6 | 98.8  | 98.7  | 113.1 | 84.9  | 68.5  |
| 115270965 | Gypc                          | 95   | 10.3  | Malaria                                                                                                                                                                                                                                                           | 96.9  | 84.1  | 85    | 79.6  | 114.1 | 112   | 114   | 116.5 |
| 66932959  | Abcg3                         | 650  | 73.6  | ABC transporters                                                                                                                                                                                                                                                  | 113.7 | 107.1 | 104.3 | 109.3 | 87.3  | 83.4  | 88.6  | 88.4  |
| 226052096 | Nfkbia                        | 314  | 35    | Herpes simplex infection; Chagas disease (American trypanosomiasis); T cell receptor signaling pathway; TNF signaling pathway; NOD-like receptor signaling pathway; Toxoplasmosis; Epstein-Barr virus infection; Chemokine signaling pathway; RIG-I-like receptor | 103.3 | 104.8 | 92.9  | 97.9  | 78.7  | 85.4  | 94.9  | 99    |
| 12963799  | Atp6v1d                       | 247  | 28.4  | mTOR signaling pathway; Rheumatoid arthritis; Metabolic pathways; Phagosome; Oxidative phosphorylation; Synaptic vesicle cycle; Collecting duct acid secretion                                                                                                    | 88.2  | 97.4  | 96.9  | 99    | 105.2 | 106.2 | 109   | 110.5 |
| 110681727 | Tacc1                         | 776  | 84.2  |                                                                                                                                                                                                                                                                   | 91    | 100.1 | 110.7 | 90.5  | 104.6 | 94.9  | 109.5 | 114.5 |
| 27754089  | 120001111<br>8Rik;<br>Gnalbp1 | 346  | 38.9  |                                                                                                                                                                                                                                                                   | 109.7 | 103.4 | 104.5 | 108.3 | 98.4  | 95.8  | 98.8  | 101.5 |

|           |                                                                |      |       |                                                                                                                                                                                                                                                                 |       |       |       |       |       |       |       |       |
|-----------|----------------------------------------------------------------|------|-------|-----------------------------------------------------------------------------------------------------------------------------------------------------------------------------------------------------------------------------------------------------------------|-------|-------|-------|-------|-------|-------|-------|-------|
| 110665722 | Taf5                                                           | 801  | 86.9  | Herpes simplex infection; Basal transcription factors                                                                                                                                                                                                           | 110   | 110.3 | 99.9  | 98.4  | 105   | 93.5  | 101.6 | 103.7 |
| 67906816  | N4bp2                                                          | 1678 | 184.6 |                                                                                                                                                                                                                                                                 | 94.6  | 89.4  | 81.8  | 79.9  | 116.7 | 117   | 106.9 | 97.6  |
| 119220579 | Med24                                                          | 987  | 109.9 | Thyroid hormone signaling pathway                                                                                                                                                                                                                               | 92.5  | 94    | 83.6  | 93.5  | 120.6 | 106.1 | 97.2  | 108.3 |
| 114205444 | Rpl38;<br>Rpl38-<br>ps1:                                       | 70   | 8.2   | Ribosome                                                                                                                                                                                                                                                        | 90.5  | 91.2  | 90.3  | 94.9  | 107.5 | 106   | 120.9 | 121.2 |
| 166706895 | Tox4                                                           | 619  | 65.9  |                                                                                                                                                                                                                                                                 | 94.3  | 91.3  | 91    | 97.9  | 106.3 | 102.3 | 109.9 | 113.4 |
| 85701644  | Fam82a2;<br>Rmdn3                                              | 470  | 52    |                                                                                                                                                                                                                                                                 | 106.4 | 90    | 94.6  | 91.6  | 101   | 113.9 | 116.7 | 113.4 |
| 254588016 | Jakmip1                                                        | 626  | 73.1  |                                                                                                                                                                                                                                                                 | 110.7 | 112.3 | 109.1 | 109.2 | 93.3  | 97.7  | 107.3 | 91.1  |
| 21314838  | Sh3glb2                                                        | 395  | 44.1  |                                                                                                                                                                                                                                                                 | 109.6 |       | 95    |       | 94.5  |       | 93.3  |       |
| 309264325 | Gm10177;<br>Sec61g;<br>Gm11575;<br>LOC1026<br>37269;<br>Gm4184 | 68   | 7.7   | Phagosome; Protein export; Protein processing in endoplasmic reticulum                                                                                                                                                                                          | 118.6 | 100.2 | 101.4 | 88.7  | 91.2  | 101.6 | 87.8  | 92.3  |
| 31542014  | Mboat7                                                         | 473  | 53.4  | Glycerophospholipid metabolism                                                                                                                                                                                                                                  | 162.6 | 168.7 | 89.4  | 91.6  | 90.7  | 84.1  | 86.5  | 78.7  |
| 164664522 | Shc1                                                           | 579  | 62.6  | ErbB signaling pathway; Phospholipase D signaling pathway; MicroRNAs in cancer; Ras signaling pathway; Prolactin signaling pathway; Focal adhesion; Insulin signaling pathway; Chemokine signaling pathway; Breast cancer; Neurotrophin signaling pathway; Alco | 104.9 | 117   | 111.2 | 107.9 | 102.1 | 103.7 | 106.6 | 92.4  |
| 40807498  | Hrsp12;<br>Rida                                                | 135  | 14.2  |                                                                                                                                                                                                                                                                 | 99.5  | 97.8  | 128.9 | 131.9 | 93.7  | 101.7 | 102.6 | 104.6 |
| 255958300 | Mtm1                                                           | 603  | 69.5  | Metabolic pathways; Inositol phosphate metabolism; Phosphatidylinositol signaling system                                                                                                                                                                        | 90.7  | 102.1 | 99.8  | 107.1 | 102.7 | 110.8 | 105.9 | 97.3  |
| 29150251  | Ddb2                                                           | 432  | 48.3  | p53 signaling pathway; Ubiquitin mediated proteolysis; Hepatitis B; Nucleotide excision repair                                                                                                                                                                  | 95.7  | 99    | 100.6 | 96.4  | 96.7  | 96.2  | 102.5 | 109.1 |
| 9790285   | Vps29                                                          | 182  | 20.5  | Endocytosis                                                                                                                                                                                                                                                     | 103.9 | 103.8 | 110.1 | 106.8 | 87    | 89.7  | 97.8  | 90.2  |
| 304434590 | Tmc8                                                           | 754  | 85.4  |                                                                                                                                                                                                                                                                 | 97.5  | 107.9 | 108.7 | 90.2  | 105.2 | 100.3 | 105.5 | 111.2 |
| 89337263  | Mrm1                                                           | 320  | 34.8  |                                                                                                                                                                                                                                                                 | 124.9 | 120.6 | 110.5 | 103.9 | 88.3  | 92.2  | 100.4 | 101.6 |
| 148747162 | Vps52                                                          | 723  | 82    |                                                                                                                                                                                                                                                                 | 87.7  | 104.8 | 95.5  | 91.6  | 112.5 | 103.4 | 101.5 | 103.2 |
| 28827824  | Emc3                                                           | 261  | 30    |                                                                                                                                                                                                                                                                 | 90.9  |       | 86.8  |       | 116.1 |       | 107.2 |       |
| 133904142 | Terf2                                                          | 540  | 60.1  |                                                                                                                                                                                                                                                                 | 99.4  | 101.8 | 88.7  | 89.7  | 98.5  | 97.5  | 104   | 98.2  |
| 312176429 | Syk                                                            | 629  | 71.3  | Phospholipase D signaling pathway; Epstein-Barr virus infection; Platelet activation; Tuberculosis; Osteoclast differentiation; B cell receptor signaling pathway; Fc gamma R-mediated phagocytosis; PI3K-Akt signaling pathway; NF-kappa B signaling pathway   | 175.8 | 149.1 | 146.8 | 129.8 | 47.9  | 61.6  | 56.5  | 73.6  |
| 31981980  | Ints9                                                          | 687  | 77.4  |                                                                                                                                                                                                                                                                 | 100.8 | 100.4 | 88.5  | 92.2  | 104.9 | 107.1 | 112.3 | 109.2 |
| 21312970  | Mtpap                                                          | 585  | 65.2  |                                                                                                                                                                                                                                                                 | 110.5 | 114.9 | 92.8  | 112.1 | 99.3  | 92.1  | 95.7  | 87    |
| 31980988  | Arl2                                                           | 184  | 20.9  |                                                                                                                                                                                                                                                                 | 92.5  | 86.4  | 95.2  | 95.2  | 100.2 | 102.7 | 115.3 | 117.8 |

|           |                               |      |       |                                                                                                                                                                                                                                                                 |       |       |       |       |       |       |       |       |
|-----------|-------------------------------|------|-------|-----------------------------------------------------------------------------------------------------------------------------------------------------------------------------------------------------------------------------------------------------------------|-------|-------|-------|-------|-------|-------|-------|-------|
| 27229145  | Zdhhc13                       | 622  | 70.8  |                                                                                                                                                                                                                                                                 | 89.6  | 88.8  | 82.5  | 87.6  | 116.9 | 113.1 | 125.9 | 128.1 |
| 21105855  | Cytip                         | 359  | 40.1  |                                                                                                                                                                                                                                                                 | 129.4 | 130.5 | 102.3 | 114.5 | 86.2  | 74    | 79    | 85.3  |
| 13385518  | Arl8b                         | 186  | 21.5  |                                                                                                                                                                                                                                                                 | 98.2  | 102.8 | 98.1  | 96    | 111.4 | 109.3 | 76.6  | 80.1  |
| 6678347   | Thy1                          | 162  | 18.1  | Leukocyte transendothelial migration                                                                                                                                                                                                                            | 85.4  | 101.3 | 92.6  | 101.3 | 82.3  | 71.7  | 70.7  | 66.8  |
| 6678489   | Sumo1                         | 101  | 11.6  | RNA transport                                                                                                                                                                                                                                                   | 114.3 | 106.4 | 123.4 | 113.3 | 79.9  | 84.7  | 86.3  | 103.4 |
| 90903233  | Gpx4                          | 253  | 29.2  |                                                                                                                                                                                                                                                                 | 123.3 | 124.7 | 114.8 | 111.5 | 87.5  | 84    | 88.5  | 87.1  |
| 255003752 | Bnip1                         | 228  | 26.2  | SNARE interactions in vesicular transport                                                                                                                                                                                                                       | 84.3  | 100.3 | 80.1  | 82.8  | 97.5  | 100.2 | 135   | 111.5 |
| 227116268 | Cdca8                         | 289  | 32.2  |                                                                                                                                                                                                                                                                 | 112.3 | 83.4  | 69.1  | 74.2  | 142.5 | 162.9 | 115.4 | 125.8 |
| 149267077 | LOC100046297;<br>LOC102642963 | 115  | 13    |                                                                                                                                                                                                                                                                 | 93.9  | 109.3 | 94    | 101   | 110.7 | 111.2 | 107.9 | 86.6  |
| 13195618  | Chmp1b                        | 199  | 22.1  | Endocytosis                                                                                                                                                                                                                                                     | 121.2 | 116.7 | 116.7 | 116.7 | 76.4  | 75.9  | 84.2  | 85.5  |
| 6680878   | Scarb2                        | 478  | 54    | Lysosome                                                                                                                                                                                                                                                        | 103.4 | 109.3 | 96.4  | 109.1 | 118.7 | 115.4 | 74.3  | 70.8  |
| 54144622  | Qtrtd1;<br>Qtrt2              | 345  | 38.5  |                                                                                                                                                                                                                                                                 | 91.3  | 98.3  | 90.6  | 92.6  | 106.7 | 103.9 | 100.4 | 109.9 |
| 124486727 | Ltn1                          | 1767 | 198.8 |                                                                                                                                                                                                                                                                 | 84    | 88.3  | 84.2  | 85.4  | 111.6 | 109.1 | 105.7 | 108   |
| 154091042 | Gigyfl                        | 1044 | 116.2 |                                                                                                                                                                                                                                                                 | 97.2  | 123.6 | 96.8  | 104.5 | 92.3  | 114.6 | 109.4 | 94.4  |
| 49249965  | Zfp3612                       | 484  | 50    |                                                                                                                                                                                                                                                                 | 87.8  | 95.6  | 114.7 | 106.7 | 102.7 | 102   | 107.4 | 107.8 |
| 21313500  | 2310011J<br>03Rik             | 109  | 12.1  |                                                                                                                                                                                                                                                                 | 115   | 129.2 | 97.5  | 102.6 | 95.2  | 102   | 102.8 | 102.9 |
| 225690589 | Htati2                        | 275  | 29.9  |                                                                                                                                                                                                                                                                 |       | 95.4  |       | 93.3  |       | 112.1 |       | 100.1 |
| 19387848  | Ict1;<br>Mrpl58               | 177  | 20.3  |                                                                                                                                                                                                                                                                 | 94    | 110.2 | 101.4 | 80.8  | 101.5 | 91.6  | 103.7 | 105.2 |
| 21312161  | Ppp2r2b                       | 446  | 52    | mRNA surveillance pathway; Chagas disease (American trypanosomiasis); Dopaminergic synapse; Hippo signaling pathway; Sphingolipid signaling pathway; Hepatitis C; PI3K-Akt signaling pathway; AMPK signaling pathway; Tight junction; Adrenergic signaling in c | 84.8  |       | 89.8  |       | 96.8  |       | 106.7 |       |
| 59958368  | A002223<br>3                  | 199  | 21.8  |                                                                                                                                                                                                                                                                 | 85.8  | 85.5  | 112.5 | 111.6 | 126.9 | 128.2 | 96.7  | 97.4  |
| 38142488  | Pdpr                          | 878  | 99.2  |                                                                                                                                                                                                                                                                 | 99.1  | 109.6 | 99.3  | 88.7  | 110.8 | 105.8 | 101   | 104.5 |
| 390125187 | Cant1                         | 440  | 49.5  |                                                                                                                                                                                                                                                                 | 90.6  | 94.3  | 90.8  | 97.6  | 103.1 | 108.2 | 115.1 | 99.2  |
| 247269408 | Exoc7                         | 697  | 79.9  | Insulin signaling pathway                                                                                                                                                                                                                                       | 102   | 100.7 | 96.6  | 97.6  | 108.5 | 101.2 | 103.2 | 103.9 |
| 226874887 | Guk1                          | 219  | 24    |                                                                                                                                                                                                                                                                 | 74.9  |       | 77    |       | 63.3  |       | 96    |       |
| 7304963   | Clic4                         | 253  | 28.7  |                                                                                                                                                                                                                                                                 | 77    | 82.2  | 71.2  | 76.4  | 128.3 | 120.8 | 112.6 | 114.4 |
| 27369836  | Larp4b                        | 741  | 81.6  |                                                                                                                                                                                                                                                                 | 98    | 78.1  | 82.2  | 82.5  | 114.5 | 117.7 | 120.5 | 131.9 |
| 228008363 | Swap70                        | 585  | 69    |                                                                                                                                                                                                                                                                 | 106.4 | 114.6 | 89.2  | 99.2  | 82.4  | 90.9  | 91.4  | 84.2  |
| 116089308 | Gga3                          | 718  | 77.9  | Lysosome                                                                                                                                                                                                                                                        |       | 101.4 |       | 81.7  |       | 109.6 |       | 106.6 |
| 157951596 | Car2                          | 260  | 29    | Pancreatic secretion; Nitrogen metabolism; Proximal tubule bicarbonate reclamation; Bile secretion; Gastric acid secretion; Collecting duct acid secretion                                                                                                      | 139.2 | 148.8 | 147.1 | 136.9 | 64.9  | 69.2  | 78.3  | 80.8  |
| 114158717 | Peli1                         | 418  | 46.2  |                                                                                                                                                                                                                                                                 | 102.6 | 87.1  | 101   | 105.4 | 84.1  | 96.3  | 94.8  | 96.7  |

|           |         |      |       |                                                                                                                                                                                                                                                                 |       |       |       |       |       |       |       |       |
|-----------|---------|------|-------|-----------------------------------------------------------------------------------------------------------------------------------------------------------------------------------------------------------------------------------------------------------------|-------|-------|-------|-------|-------|-------|-------|-------|
| 6754160   | Hax1    | 280  | 31.6  |                                                                                                                                                                                                                                                                 | 91.2  | 90.7  | 80.9  | 82.9  | 120.5 | 121.9 | 123.1 | 122.3 |
| 17157985  | Mrps5   | 432  | 48.2  | Ribosome                                                                                                                                                                                                                                                        | 91.6  | 95.3  | 92.2  | 92    | 106.2 | 107.8 | 109.7 | 106   |
| 27229271  | Polr3h  | 204  | 22.9  | RNA polymerase; Epstein-Barr virus infection; Metabolic pathways; Purine metabolism; Pyrimidine metabolism; Cytosolic DNA-sensing pathway                                                                                                                       | 95.8  | 97.4  | 89.5  | 86.8  | 108.7 | 107.7 | 101.4 | 121.5 |
| 170295809 | Txk     | 527  | 61.1  |                                                                                                                                                                                                                                                                 | 114   | 96.9  | 111.5 | 90.3  | 85.3  | 109.2 | 84.8  | 81.2  |
| 227330625 | Man2b2  | 1018 | 115.5 | Other glycan degradation                                                                                                                                                                                                                                        | 122.4 | 109.1 | 102.7 | 103.3 | 111.5 | 110.7 | 92.2  | 94.4  |
| 31044423  | Alkbh5  | 395  | 44.4  |                                                                                                                                                                                                                                                                 | 110.3 | 94.4  | 95.3  | 99.7  | 114.3 | 116.6 | 101.3 | 104.4 |
| 244790087 | Myef2   | 591  | 63.3  |                                                                                                                                                                                                                                                                 | 98.6  | 107.1 | 104.8 | 102.5 | 98.2  | 99.7  | 116   | 101.8 |
| 20127150  | Golga4  | 2238 | 257.4 |                                                                                                                                                                                                                                                                 | 105.5 | 112.7 | 86.9  | 93.6  | 108   | 109.5 | 108.4 | 99.2  |
| 47271524  | G6pc3   | 346  | 38.8  | FoxO signaling pathway; Carbohydrate digestion and absorption; Insulin signaling pathway; Metabolic pathways; Insulin resistance; Starch and sucrose metabolism; Glycolysis / Gluconeogenesis; Adipocytokine signaling pathway; PI3K-Akt signaling pathway; AMP |       |       |       |       |       |       |       |       |
| 83649747  | Rai1    | 1889 | 201.4 |                                                                                                                                                                                                                                                                 | 95.4  | 99.2  | 105.1 | 105.4 | 97.6  | 91.7  | 98.5  | 134.3 |
| 124517678 | Ptpn23  | 1692 | 185.1 |                                                                                                                                                                                                                                                                 | 102.6 | 93    | 98.4  | 100.4 | 105.8 | 107.8 | 109.7 | 102   |
| 238624169 | Ss18    | 418  | 45.8  | Transcriptional misregulation in cancer                                                                                                                                                                                                                         | 115.5 | 120.6 | 102.2 | 102.5 | 84.4  | 84.4  | 103.6 | 103.7 |
| 8393066   | Ccs     | 274  | 28.9  | Amyotrophic lateral sclerosis (ALS)                                                                                                                                                                                                                             | 107.7 | 94.7  | 105.2 | 101.6 | 102.9 | 101.8 | 84.9  | 93.9  |
| 21735427  | Rwdd1   | 243  | 27.8  |                                                                                                                                                                                                                                                                 | 97.2  | 93.4  | 100.6 | 100.8 | 107.8 | 109.6 | 86.5  | 83.5  |
| 37059808  | Rnf220  | 566  | 62.7  |                                                                                                                                                                                                                                                                 | 116.1 | 102.1 | 88    | 101.8 | 107.6 | 111   | 127.6 | 104.4 |
| 24528555  | Ntmt1   | 223  | 25.4  |                                                                                                                                                                                                                                                                 | 95.5  | 89.8  | 77.6  | 82.3  | 120.1 | 117.3 | 110.4 | 106.3 |
| 27369650  | Mtrr    | 696  | 77.5  |                                                                                                                                                                                                                                                                 | 90    | 72.9  | 107.4 | 90.4  | 101.9 | 130.8 | 94.1  | 116.7 |
| 237649085 | Pum2    | 1064 | 114   |                                                                                                                                                                                                                                                                 | 94.7  |       | 90.9  |       | 102.2 |       | 114.5 |       |
| 166063974 | Tlk2    | 750  | 85.3  |                                                                                                                                                                                                                                                                 | 104.1 | 108.8 | 100.7 | 89.6  | 113.6 | 111.8 | 86    | 107.6 |
| 9790221   | Arpc1a  | 370  | 41.6  | Endocytosis; Regulation of actin cytoskeleton; Salmonella infection; Fc gamma R-mediated phagocytosis; Bacterial invasion of epithelial cells                                                                                                                   | 91.3  |       | 94.4  |       | 111.5 |       | 104.6 |       |
| 22165378  | Spin1   | 262  | 29.6  |                                                                                                                                                                                                                                                                 | 109.5 | 111.2 | 110.1 | 107.4 | 92    | 86.4  | 80.7  | 85.6  |
| 30794236  | Ano10   | 659  | 76.1  |                                                                                                                                                                                                                                                                 | 115.1 |       | 103.3 |       | 88.5  |       | 93.5  |       |
| 31981251  | Chtop   | 224  | 23.8  |                                                                                                                                                                                                                                                                 | 111.1 | 149.9 | 108.1 | 104.1 | 92.4  | 72.2  | 95.9  | 85.9  |
| 218083710 | Chid1   | 396  | 45.2  |                                                                                                                                                                                                                                                                 | 110.6 | 116.4 | 102.4 | 95.8  | 102.3 | 117.6 | 92.8  | 100.6 |
| 359465533 | Elp3    | 566  | 64.2  |                                                                                                                                                                                                                                                                 | 107.4 |       | 103.7 |       | 97.9  |       | 86.8  |       |
| 6755304   | Pitpnm2 | 1281 | 142.2 |                                                                                                                                                                                                                                                                 |       | 105.8 |       | 85    |       | 86.7  |       | 107   |
| 161353515 | Ranbp9  | 710  | 75.7  |                                                                                                                                                                                                                                                                 | 91.4  | 85.1  | 87.5  | 83.3  | 101.9 | 126   | 106   | 87.5  |
| 451172117 | Alad    | 330  | 36    | Metabolic pathways; Porphyrin and chlorophyll metabolism                                                                                                                                                                                                        | 85.8  | 97.3  | 80.6  | 90    | 131.6 | 100.6 | 129   | 106.8 |
| 6679493   | Psen1   | 467  | 52.6  | Wnt signaling pathway; Notch signaling pathway; Neurotrophin signaling pathway; Alzheimer's disease                                                                                                                                                             | 108.9 | 93.9  | 84.4  | 100.6 | 113.2 | 120.1 | 125.3 | 115.9 |
| 133778989 | Prkci   | 595  | 68.2  | Endocytosis; Insulin signaling pathway; Hippo signaling pathway; Platelet activation; Rap1 signaling pathway; Tight junction                                                                                                                                    | 79.2  | 83.9  | 92    | 83.3  | 134.4 | 116.1 | 121.5 | 112.3 |

|           |                       |      |       |                                                                                                                                                                                                                                                     |       |       |       |       |       |       |       |       |
|-----------|-----------------------|------|-------|-----------------------------------------------------------------------------------------------------------------------------------------------------------------------------------------------------------------------------------------------------|-------|-------|-------|-------|-------|-------|-------|-------|
| 160415215 | Akr1b7                | 316  | 36    | Metabolic pathways; Glycerolipid metabolism; Fructose and mannose metabolism; Pentose and glucuronate interconversions; Galactose metabolism                                                                                                        | 57.3  | 39.9  | 47    | 44.1  | 53.9  | 42.6  | 60.3  | 59.2  |
| 225543110 | Ythdf2                | 579  | 62.2  |                                                                                                                                                                                                                                                     | 90.8  | 95.4  | 88.4  | 88    | 110.1 | 107.9 | 111.3 | 111.4 |
| 27229022  | 2610002<br>M06Rik     | 199  | 22.1  | Endocytosis                                                                                                                                                                                                                                         | 110.5 | 110   | 108.1 | 108   | 91.1  | 90.5  | 82.4  | 81.4  |
| 258679475 | Zfyve19               | 389  | 43.2  |                                                                                                                                                                                                                                                     | 92.8  |       | 107.3 |       | 107.2 |       | 110.2 |       |
| 139948818 | Fam98a                | 515  | 55    |                                                                                                                                                                                                                                                     | 79.6  | 79.3  | 92.7  | 97.4  | 161.2 | 153.1 | 110.5 | 116.9 |
| 257196261 | Osbp11                | 757  | 84.3  |                                                                                                                                                                                                                                                     | 97.6  | 117.3 | 100.9 | 106.7 | 107.8 | 93    | 99.4  | 111.5 |
| 31541911  | Lrrc40                | 602  | 68    |                                                                                                                                                                                                                                                     | 74.8  | 92.6  | 86    | 83.5  | 122.5 | 110.1 | 134.8 | 120.4 |
| 21312666  | Fam134c;<br>Retreg3   | 466  | 51.6  |                                                                                                                                                                                                                                                     | 116.4 |       | 96.7  |       | 115.4 |       | 83.7  |       |
| 87299588  | Dvl2                  | 736  | 78.8  | mTOR signaling pathway; Wnt signaling pathway; Basal cell carcinoma; Hippo signaling pathway; Breast cancer; Signaling pathways regulating pluripotency of stem cells; Melanogenesis; HTLV-I infection; Notch signaling pathway; Pathways in cancer | 111   | 98    | 100.2 | 98.4  | 97.5  | 102.2 | 107.1 | 107.1 |
| 169790912 | Ormdl1                | 153  | 17.3  |                                                                                                                                                                                                                                                     | 105.8 | 80.2  | 85.1  | 79.5  | 105.9 | 84.5  | 106.3 | 133.2 |
| 124487245 | BC026590<br>; Fam206a | 193  | 21.6  |                                                                                                                                                                                                                                                     | 96.5  |       | 83.6  |       | 103.3 |       | 104.6 |       |
| 19263324  | Clns1a                | 241  | 26.5  | RNA transport                                                                                                                                                                                                                                       | 96.9  | 100.8 | 86.3  | 95    | 109.2 | 101.3 | 116.6 | 108.8 |
| 21312920  | Ttc33                 | 262  | 29.4  |                                                                                                                                                                                                                                                     | 121   |       | 98.7  |       | 87.6  |       | 119.2 |       |
| 118026940 | Ncoa2                 | 1462 | 158.4 | Thyroid hormone signaling pathway                                                                                                                                                                                                                   | 95.3  | 92.5  | 99.9  | 106.6 | 100.2 | 97.8  | 106.4 | 100.9 |
| 255760055 | Bcap29                | 240  | 27.9  |                                                                                                                                                                                                                                                     | 91.8  | 93.9  | 83.5  | 88.2  | 118.7 | 111.3 | 99.4  | 102.3 |
| 9903609   | Txn2                  | 166  | 18.2  | NOD-like receptor signaling pathway                                                                                                                                                                                                                 | 110.2 | 113.7 | 96.6  | 98.9  | 111.2 | 109.6 | 81.5  | 82.8  |
| 160298168 | Gbas;<br>Nipsnap2     | 281  | 32.9  |                                                                                                                                                                                                                                                     | 108.8 | 107.2 | 110.6 | 110.9 | 98.4  | 95.5  | 82.6  | 84.8  |
| 171906555 | Nsmaf                 | 920  | 104.5 | Sphingolipid signaling pathway                                                                                                                                                                                                                      | 123.7 |       | 108.5 |       | 112.1 |       | 89.6  |       |
| 6755945   | Usf2                  | 346  | 36.9  |                                                                                                                                                                                                                                                     | 104   | 112.1 | 104.3 | 92.4  | 95.9  | 95.2  | 102.7 | 114.8 |
| 56090602  | D8Ert73<br>8e         | 94   | 10.2  |                                                                                                                                                                                                                                                     | 122.1 | 120   | 124.7 | 124.7 | 77.1  | 73.3  | 76.7  | 80.2  |
| 238776839 | Atpaf2                | 298  | 34.3  |                                                                                                                                                                                                                                                     | 89.6  |       | 91    |       | 117.3 |       | 112.1 |       |
| 21313520  | Aacs                  | 672  | 75.2  | Valine, leucine and isoleucine degradation; Butanoate metabolism                                                                                                                                                                                    | 79.1  | 78.7  | 76.4  | 79.4  | 130.2 | 129   | 121.7 | 122.4 |
| 6679459   | Prim1                 | 417  | 49.3  | DNA replication; Metabolic pathways; Purine metabolism; Pvrimidine metabolism                                                                                                                                                                       | 75.3  | 72    | 78.4  | 72    | 128   | 127.4 | 129.7 | 137.7 |
| 114205435 | Baz2a                 | 1887 | 209.3 |                                                                                                                                                                                                                                                     | 102.1 | 95.4  | 98.3  | 92.5  | 109.7 | 107.5 | 102.6 | 93.9  |
| 19882245  | Fam122a               | 284  | 30.3  |                                                                                                                                                                                                                                                     | 118.2 | 120.2 | 106.3 | 105.6 | 104.6 | 86.7  | 89.1  | 93.5  |
| 124487075 | Mrpl44                | 333  | 37.5  |                                                                                                                                                                                                                                                     | 92.9  | 89.9  | 80.5  | 86.5  | 116   | 118.2 | 116.5 | 120.8 |
| 21312159  | Eif1b                 | 113  | 12.8  | RNA transport                                                                                                                                                                                                                                       | 108.1 | 106.7 | 102.4 | 107.4 | 89.8  | 85.5  | 105.6 | 108.4 |
| 9790125   | Tagln3                | 199  | 22.5  |                                                                                                                                                                                                                                                     | 117.1 | 118.7 | 149.7 | 159.1 | 93.3  | 110.1 | 60    | 62.7  |
| 256985168 | Kif23                 | 953  | 108.7 | MicroRNAs in cancer                                                                                                                                                                                                                                 |       | 82.5  |       | 62.5  |       | 156   |       | 109.9 |



|           |                                          |      |       |                                                                                                                                                                                                                                                                 |       |       |       |       |       |       |       |       |
|-----------|------------------------------------------|------|-------|-----------------------------------------------------------------------------------------------------------------------------------------------------------------------------------------------------------------------------------------------------------------|-------|-------|-------|-------|-------|-------|-------|-------|
| 167736371 | Ube4a                                    | 1028 | 118.1 | Ubiquitin mediated proteolysis                                                                                                                                                                                                                                  | 113.4 | 116   | 105   | 109.9 | 97.9  | 92.1  | 98.9  | 98.5  |
| 294979205 | Wiz                                      | 956  | 102.9 |                                                                                                                                                                                                                                                                 | 112.9 | 96.2  | 78.4  | 93.9  | 100   | 101.2 | 90.6  | 118.1 |
| 359465599 | Fibp                                     | 364  | 41.8  |                                                                                                                                                                                                                                                                 | 107.7 | 135.1 | 104.3 | 137.2 | 99.2  | 88.5  | 101.4 | 82.3  |
| 21326440  | Zwint                                    | 252  | 28.7  |                                                                                                                                                                                                                                                                 | 45    | 68.9  | 61    | 58.2  | 138.3 | 142.1 | 181.5 | 151.8 |
| 88853575  | Sft2d1;<br>Gm12166                       | 159  | 17.9  |                                                                                                                                                                                                                                                                 |       |       |       |       |       |       |       |       |
| 62526126  | Exoc6                                    | 804  | 93.2  |                                                                                                                                                                                                                                                                 | 100.9 | 112.6 | 95.7  | 94.1  | 106.2 | 100.1 | 112.6 | 107.1 |
| 153792192 | Incenp                                   | 876  | 100.7 |                                                                                                                                                                                                                                                                 | 86.9  | 62.9  | 71.9  | 60.7  | 132.9 | 148.6 | 152.4 | 177.7 |
| 6679461   | Prim2                                    | 505  | 58.4  | DNA replication; Metabolic pathways; Purine metabolism; Pyrimidine metabolism                                                                                                                                                                                   | 59.5  | 65.2  | 62    | 62.7  | 152.3 | 146   | 147.2 | 150.1 |
| 359718904 | Kmt2d;<br>Mll2                           | 5588 | 599.9 | Lysine degradation                                                                                                                                                                                                                                              | 100.5 | 100.7 | 95.9  | 100.3 | 99    | 101   | 102.4 | 108.5 |
| 114145497 | Rrad                                     | 307  | 33.2  |                                                                                                                                                                                                                                                                 |       | 94.1  |       | 91.9  |       | 110.1 |       | 98.7  |
| 165932326 | Pdcl                                     | 301  | 34.4  |                                                                                                                                                                                                                                                                 | 82.6  | 88.7  | 82.5  | 89.6  | 108.6 | 107.8 | 123.2 | 112.8 |
| 49274623  | Sema4d                                   | 861  | 95.6  | Axon guidance                                                                                                                                                                                                                                                   | 103.4 | 102.4 | 92.4  | 109.6 | 83.4  | 87.5  | 92.3  | 78    |
| 123701962 | Lmbrd1                                   | 537  | 61    | Vitamin digestion and absorption                                                                                                                                                                                                                                |       |       |       |       |       |       |       |       |
| 119372300 | Atl2                                     | 583  | 66.2  |                                                                                                                                                                                                                                                                 | 85.7  | 88.8  | 78.5  | 81.4  | 114.3 | 117.9 | 133   | 131.4 |
| 21312171  | Ccdc94                                   | 314  | 36    |                                                                                                                                                                                                                                                                 |       |       |       |       |       |       |       |       |
| 30794454  | Nob1                                     | 403  | 45.4  | Ribosome biogenesis in eukaryotes                                                                                                                                                                                                                               | 97.5  | 96.7  | 95    | 110.1 | 108.8 | 111.2 | 109.5 | 111.6 |
| 197382455 | Tomm5                                    | 61   | 7     |                                                                                                                                                                                                                                                                 | 107.1 | 91.5  | 110.8 | 97.5  | 135.5 | 116   | 90.4  | 99.1  |
| 377834688 | LOC100862531;<br>Gtpbp3;<br>LOC102642476 | 492  | 52.1  |                                                                                                                                                                                                                                                                 |       | 142.2 |       | 96.5  |       | 103   |       | 97.4  |
| 47059073  | Thbs1                                    | 1171 | 129.6 | p53 signaling pathway; MicroRNAs in cancer; Focal adhesion; Phagosome; Proteoglycans in cancer; TGF-beta signaling pathway; Rap1 signaling pathway; ECM-receptor interaction; PI3K-Akt signaling pathway; Malaria; Bladder                                      | 186.6 | 154.5 | 167.1 | 128.9 | 65.2  | 81.6  | 76.7  | 79.3  |
| 9910500   | Poll                                     | 573  | 62.9  | Non-homologous end-joining; Base excision repair                                                                                                                                                                                                                | 115   | 112.6 | 98.3  | 101.9 | 94.5  | 89.4  | 83.7  | 99.5  |
| 6753118   | Arih2                                    | 492  | 57.7  |                                                                                                                                                                                                                                                                 | 114.5 | 113.5 | 103.7 | 93.3  | 75    | 108.3 | 99.6  | 103.5 |
| 6678768   | Marcks                                   | 309  | 29.6  | MicroRNAs in cancer; Fc gamma R-mediated phagocytosis                                                                                                                                                                                                           | 113   | 102.2 | 92.1  | 92    | 41.5  | 49.2  | 57.7  | 66    |
| 13385890  | Atg3                                     | 314  | 35.8  | Autophagy                                                                                                                                                                                                                                                       | 113.4 | 116.3 | 116   | 104.2 | 87.9  | 94.9  | 79.9  | 82    |
| 124486620 | Setdb2                                   | 713  | 80.6  |                                                                                                                                                                                                                                                                 | 126   | 134.9 | 101.8 | 96.1  | 89.3  | 88    | 88.9  | 90.8  |
| 291327470 | Itp1                                     | 2749 | 313   | Oxytocin signaling pathway; Cholinergic synapse; Retrograde endocannabinoid signaling; Pancreatic secretion; Dopaminergic synapse; NOD-like receptor signaling pathway; Long-term potentiation; Platelet activation; Thyroid hormone synthesis; Oocyte meiosis; |       |       |       |       |       |       |       |       |
| 31982053  | Relb                                     | 558  | 60.3  | MAPK signaling pathway; Epstein-Barr virus infection; HTLV-I infection; Osteoclast differentiation; NF-kappa B signaling pathway                                                                                                                                | 108.8 | 97.5  | 99.3  | 98    | 111   | 109.9 | 112.4 | 105.9 |

|           |                                             |      |       |                                                                                                                                                                                                                                                                |       |       |       |       |       |       |       |       |
|-----------|---------------------------------------------|------|-------|----------------------------------------------------------------------------------------------------------------------------------------------------------------------------------------------------------------------------------------------------------------|-------|-------|-------|-------|-------|-------|-------|-------|
| 44662811  | D10Wsu1<br>02e                              | 185  | 20    |                                                                                                                                                                                                                                                                | 119.2 | 116.7 | 87.3  | 79.1  | 93.5  | 102.5 | 116.1 | 106.2 |
| 160333201 | Tmem87a                                     | 560  | 63.8  |                                                                                                                                                                                                                                                                | 96.6  | 101.4 | 90.2  | 94.3  | 111.2 | 101.5 | 122.7 | 114.6 |
| 12331398  | Scamp2                                      | 329  | 36.4  |                                                                                                                                                                                                                                                                | 92.1  | 100.3 | 101.8 | 95    | 137.3 | 118.3 | 99.2  | 108.3 |
| 46592877  | Ccnl2                                       | 518  | 58    |                                                                                                                                                                                                                                                                | 106.6 | 114.3 | 88.7  | 92.2  | 106.4 | 100.7 | 95.4  | 108.4 |
| 20270289  | Hexim1                                      | 356  | 40.2  |                                                                                                                                                                                                                                                                | 98.1  | 89.9  | 90.2  | 89.3  | 110.5 | 119.4 | 123.3 | 122.8 |
| 407262763 | Gm10499                                     | 411  | 45.8  |                                                                                                                                                                                                                                                                |       | 94.2  |       | 89.9  |       | 114.3 |       | 107.8 |
| 17941277  | Stampb                                      | 424  | 48.5  | Endocytosis                                                                                                                                                                                                                                                    | 111.8 | 107.5 | 108.3 | 125.3 | 100.2 | 99.4  | 80.6  | 54.5  |
| 304361734 | Ppfia1                                      | 1266 | 142.6 |                                                                                                                                                                                                                                                                | 103.4 | 113.5 | 93.8  | 92.1  | 106.9 | 96    | 105.9 | 105.7 |
| 71043959  | Otud7b                                      | 840  | 91.9  |                                                                                                                                                                                                                                                                | 100.4 | 112.4 | 87.5  | 90.1  | 91.5  | 95.5  | 96.9  | 82.2  |
| 31560264  | Abhd6                                       | 336  | 38.2  | Retrograde endocannabinoid signaling                                                                                                                                                                                                                           | 101.7 |       | 108.2 |       | 93.8  |       | 95.5  |       |
| 82922210  | Nsa2;<br>LOC6363<br>06;<br>LOC1026<br>42514 | 260  | 30    |                                                                                                                                                                                                                                                                | 76.3  | 79.9  | 92.2  | 80.1  | 125.4 | 119.9 | 133.8 | 142.7 |
| 6679555   | Ptpn22                                      | 802  | 89.7  |                                                                                                                                                                                                                                                                | 98    | 92.9  | 99.6  | 105.4 | 133.3 | 121.7 | 101.7 | 102   |
| 111154070 | Ttfl                                        | 859  | 97.7  | Thyroid hormone synthesis                                                                                                                                                                                                                                      | 103.1 | 107   | 96.9  | 107.7 | 117.1 | 104.3 | 103.9 | 98.9  |
| 6679641   | Emd                                         | 259  | 29.4  | Hypertrophic cardiomyopathy (HCM); Arrhythmogenic right ventricular cardiomyopathy (ARVC); Dilated                                                                                                                                                             | 96    | 90.8  | 96.1  | 100.6 | 114.3 | 115.7 | 86.9  | 81.8  |
| 124486857 | Ibtk                                        | 1352 | 149.5 |                                                                                                                                                                                                                                                                | 91.1  | 92.7  | 98.3  | 86.9  | 121.3 | 105.5 | 110.5 | 107.9 |
| 14916479  | M6pr                                        | 278  | 31.2  | Lysosome; Phagosome                                                                                                                                                                                                                                            | 97.2  | 87.3  | 94.7  | 88.3  | 108.1 | 110.8 | 115.6 | 116.9 |
| 86198335  | Nudt2                                       | 147  | 17    | Purine metabolism; Pyrimidine metabolism                                                                                                                                                                                                                       | 104.3 | 107.4 | 115.3 | 101.7 | 102.4 | 105.5 | 96.3  | 94.2  |
| 23956156  | Lsm14a                                      | 462  | 50.5  |                                                                                                                                                                                                                                                                | 101.7 | 105.2 | 108.6 | 107.2 | 113.9 | 96.4  | 55.8  | 74.9  |
| 13385044  | Rpl35                                       | 123  | 14.5  | Ribosome                                                                                                                                                                                                                                                       | 83.9  | 82.4  | 84.1  | 79.4  | 104.7 | 106.4 | 130.4 | 137.9 |
| 110625645 | Sorl1                                       | 2215 | 246.9 |                                                                                                                                                                                                                                                                | 110.1 | 100.4 | 106.1 | 115   | 88.9  | 102.1 | 95.3  | 78.5  |
| 170650601 | Macrodl                                     | 323  | 35.3  |                                                                                                                                                                                                                                                                | 108.9 | 112.1 | 106.8 | 117.4 | 96    | 94.3  | 95.2  | 84.2  |
| 84794593  | Pofut1                                      | 393  | 44.7  | Other types of O-glycan biosynthesis                                                                                                                                                                                                                           | 103.4 | 107   | 93    | 97.8  | 124.4 | 92.7  | 103.4 | 91.5  |
| 112983636 | Krt10                                       | 561  | 57    | Staphylococcus aureus infection                                                                                                                                                                                                                                | 152.3 | 95.7  | 97.5  | 107.8 | 91.4  | 108.9 | 85.8  | 78.7  |
| 46877076  | Eya3                                        | 526  | 57.8  |                                                                                                                                                                                                                                                                | 98.5  | 100.3 | 87.1  | 97.1  | 114.5 | 104   | 110.6 | 113.4 |
| 408440823 | Orc2                                        | 576  | 65.9  | Cell cycle                                                                                                                                                                                                                                                     | 88.1  | 90.3  | 101.6 | 99.8  | 116.8 | 115.8 | 103.5 | 118.5 |
| 282165737 | Vps41                                       | 853  | 98.5  |                                                                                                                                                                                                                                                                | 115.9 | 107.2 | 106.3 | 103.8 | 104.1 | 101.9 | 93.9  | 102.8 |
| 6679160   | Nxn                                         | 435  | 48.3  |                                                                                                                                                                                                                                                                | 102.7 | 102   | 75.8  | 78.4  | 109.8 | 118.7 | 118.7 | 116.7 |
| 12963783  | Lime1                                       | 269  | 29.5  |                                                                                                                                                                                                                                                                | 104.4 |       | 103.3 |       | 100.7 |       | 109.1 |       |
| 31541815  | Ehhadh                                      | 718  | 78.3  | PPAR signaling pathway; Fatty acid metabolism; Tryptophan metabolism; Valine, leucine and isoleucine degradation; Metabolic pathways; Lysine degradation; Fatty acid degradation; Butanoate metabolism; beta-Alanine metabolism; Propanoate metabolism; Carbon | 101   | 113.4 | 99.1  | 102   | 108.2 | 117.6 | 81.6  | 72.5  |
| 225735586 | Ctu2                                        | 514  | 56.1  | Sulfur relay system                                                                                                                                                                                                                                            | 99.4  | 97.4  | 97.7  | 99.3  | 108.8 | 98.2  | 100.1 | 116.1 |
| 10946950  | Rcll                                        | 373  | 40.8  | Ribosome biogenesis in eukaryotes                                                                                                                                                                                                                              |       | 86.2  |       | 85    |       | 115.3 |       | 123.5 |

|           |                           |      |       |                                                                                                                                                                                                                                                                   |       |       |       |       |       |       |       |       |
|-----------|---------------------------|------|-------|-------------------------------------------------------------------------------------------------------------------------------------------------------------------------------------------------------------------------------------------------------------------|-------|-------|-------|-------|-------|-------|-------|-------|
| 6754772   | Myd88                     | 296  | 33.7  | Herpes simplex infection; Chagas disease (American trypanosomiasis); African trypanosomiasis; NOD-like receptor signaling pathway; Toxoplasmosis; Tuberculosis; Hepatitis B; Toll-like receptor signaling pathway; Pertussis; Salmonella infection; Legionellosis | 99.1  | 101.9 | 104.4 | 103.7 | 104.7 | 104   | 99.3  | 98    |
| 443609479 | Baat1;<br>Brat1           | 867  | 93.8  |                                                                                                                                                                                                                                                                   | 101.7 | 89.1  | 97.5  | 90    | 96.6  | 106.9 | 111.6 | 106.1 |
| 31542608  | Elp4                      | 422  | 46.3  |                                                                                                                                                                                                                                                                   | 108.5 | 109.8 | 92.3  | 94.2  | 99.9  | 95.1  | 103.2 | 98.2  |
| 115270981 | Ccdc69                    | 202  | 23.3  |                                                                                                                                                                                                                                                                   | 113.2 | 114.3 | 95.5  | 105.2 | 109.3 | 86.8  | 86.2  | 111.5 |
| 226958545 | Kdm5a                     | 1690 | 192.1 |                                                                                                                                                                                                                                                                   | 96.8  | 99.4  | 92.3  | 94.7  | 98.1  | 94.9  | 109.5 | 105   |
| 78191784  | Nkrf                      | 690  | 77.7  |                                                                                                                                                                                                                                                                   | 99.3  | 77.5  | 88    | 71.4  | 118.4 | 123.4 | 84.3  | 128.5 |
| 282847450 | Krit1                     | 736  | 83.9  | Rap1 signaling pathway                                                                                                                                                                                                                                            | 98.9  | 89.4  | 98.4  | 94.8  | 93.8  | 104.2 | 97.2  | 96.2  |
| 51010909  | Try5                      | 246  | 26.3  | Pancreatic secretion; Protein digestion and absorption; Influenza A; Neuroactive ligand-receptor interaction                                                                                                                                                      | 77.5  | 74.3  | 96.7  | 98.1  | 145.3 | 148   | 110.2 | 114.7 |
| 6755160   | Eif2ak2                   | 515  | 58.2  | Herpes simplex infection; Epstein-Barr virus infection; Influenza A; Hepatitis C; Protein processing in endoplasmic reticulum; Viral carcinogenesis; Measles                                                                                                      | 94.8  |       | 96.6  |       | 100.1 |       | 96.6  |       |
| 71043934  | Szrd1                     | 152  | 17    |                                                                                                                                                                                                                                                                   | 116.3 | 111.4 | 99.9  | 91.5  | 97.9  | 99.7  | 105.8 | 113.4 |
| 83649762  | Wash;<br>Wash1;<br>Washc1 | 475  | 51.6  | Endocytosis                                                                                                                                                                                                                                                       | 118.9 | 119.5 | 99.1  | 111.8 | 90.6  | 88.3  | 103.1 | 99    |
| 31543478  | Pias1                     | 651  | 71.6  | Ubiquitin mediated proteolysis; Jak-STAT signaling pathway; Hepatitis C                                                                                                                                                                                           | 100.4 | 100.1 | 106.7 | 102.6 | 102.1 | 107.1 | 93.4  | 87.2  |
| 21450239  | Mtmr6                     | 617  | 70.9  | Metabolic pathways; Inositol phosphate metabolism; Phosphatidylinositol signaling system                                                                                                                                                                          | 88.7  | 93.2  | 92.6  | 89.1  | 120.5 | 131.9 | 77.3  | 65    |
| 259089444 | Hdac10                    | 666  | 72.1  | Alcoholism; Viral carcinogenesis                                                                                                                                                                                                                                  | 110.2 | 97.2  | 95.6  | 102.6 | 94.8  | 97.5  | 105   | 105.2 |
| 31980615  | Mcrs1                     | 462  | 51.7  | Herpes simplex infection                                                                                                                                                                                                                                          | 103.5 | 107.2 | 88.8  | 104   | 117.2 | 114.5 | 114   | 97.9  |
| 157951743 | H2-Ke6                    | 259  | 26.6  | Steroid hormone biosynthesis; Metabolic pathways                                                                                                                                                                                                                  | 105.3 | 96.5  | 100.5 | 102   | 100.7 | 115.7 | 102.8 | 107.9 |
| 6680512   | Junb                      | 344  | 35.7  | TNF signaling pathway; Osteoclast differentiation                                                                                                                                                                                                                 | 86.3  |       | 86.1  |       | 119.2 |       | 137.1 |       |
| 6753078   | Ap3s1                     | 193  | 21.7  | Lysosome                                                                                                                                                                                                                                                          | 94.8  | 80.5  | 115.4 | 120.2 | 97.5  | 93.5  | 87.7  | 102.2 |
| 7106335   | Krt17                     | 433  | 48.1  |                                                                                                                                                                                                                                                                   | 75.2  |       | 70    |       | 271.2 |       | 97.7  |       |
| 30387632  | Cdc23                     | 597  | 68.5  | Progesterone-mediated oocyte maturation; Ubiquitin mediated proteolysis; HTLV-I infection; Oocyte meiosis;                                                                                                                                                        | 90.6  | 97.9  | 89.7  | 98    | 115.6 | 109.2 | 105.1 | 103.7 |
| 149267789 | Gm4943                    | 143  | 15.2  |                                                                                                                                                                                                                                                                   | 94.1  | 99.4  | 105.8 | 104.6 | 101.4 | 101.1 | 88.7  | 88.1  |
| 268370034 | Mpg                       | 333  | 36.4  | Base excision repair                                                                                                                                                                                                                                              | 112.2 | 108.9 | 95.4  | 104.4 | 98    | 97    | 90.4  | 87.4  |
| 291621688 | Trappc8                   | 1437 | 160.8 |                                                                                                                                                                                                                                                                   | 95.2  | 91.4  | 99.7  | 91.1  | 95.7  | 88.5  | 117.2 | 134.5 |
| 30039690  | Agfg2                     | 479  | 48.9  |                                                                                                                                                                                                                                                                   | 114.1 | 112   | 97    | 89.9  | 95.7  | 94.1  | 98.9  | 96.2  |
| 83921607  | Vps72                     | 368  | 40.8  |                                                                                                                                                                                                                                                                   | 106   | 105.6 | 103.7 | 98.9  | 93.6  | 91.7  | 99.7  | 95.8  |
| 13386014  | Emc4                      | 183  | 20.1  |                                                                                                                                                                                                                                                                   | 93.6  | 96    | 108.9 | 109.4 | 105.4 | 93.2  | 102.8 | 93.2  |
| 6754900   | Nt5e                      | 576  | 63.8  | Metabolic pathways; Nicotinate and nicotinamide metabolism; Purine metabolism; Pyrimidine metabolism                                                                                                                                                              | 115.8 | 100.4 | 100.7 | 100.2 | 93.5  | 93.4  | 98.7  | 111.1 |
| 6754646   | Matk                      | 505  | 56.1  | Neurotrophin signaling pathway                                                                                                                                                                                                                                    | 108.5 |       | 103.6 |       | 101.1 |       | 98.8  |       |

|           |                            |      |       |                                                                                                                                                                                      |       |       |       |       |       |       |       |       |
|-----------|----------------------------|------|-------|--------------------------------------------------------------------------------------------------------------------------------------------------------------------------------------|-------|-------|-------|-------|-------|-------|-------|-------|
| 13385726  | Uqcrb                      | 111  | 13.6  | Metabolic pathways; Huntington's disease; Non-alcoholic fatty liver disease (NAFLD); Oxidative phosphorylation; Parkinson's disease; Alzheimer's disease; Cardiac muscle contraction | 114.9 | 113.4 | 113.2 | 109.3 | 95.4  | 98.1  | 71.1  | 75.3  |
| 27754054  | Dcakd                      | 231  | 26.5  |                                                                                                                                                                                      | 90.7  | 85.9  | 82.6  | 83.9  | 117   | 120.3 | 126.3 | 120.5 |
| 21313158  | Ift27                      | 186  | 20.8  |                                                                                                                                                                                      | 84.4  | 80.3  | 81.4  | 73.9  | 114.3 | 116   | 130.4 | 125.7 |
| 113199779 | Rad17                      | 688  | 77.3  |                                                                                                                                                                                      | 108.5 |       | 94.4  |       | 101.1 |       | 95.1  |       |
| 13384796  | Ier3ip1                    | 82   | 9     |                                                                                                                                                                                      | 85.8  | 85.6  | 83.4  | 86    | 109.3 | 105.4 | 127   | 125.6 |
| 77736535  | Stx18                      | 334  | 38.4  | Phagosome; SNARE interactions in vesicular transport                                                                                                                                 | 99.9  | 88.1  | 101.2 | 91.4  | 106   | 110.4 | 112.3 | 116.8 |
| 148747128 | Stt3a                      | 705  | 80.5  | Metabolic pathways; N-Glycan biosynthesis; Protein processing in endoplasmic reticulum                                                                                               | 89.9  | 88.7  | 85.5  | 84.6  | 120.7 | 118.9 | 94.2  | 95.4  |
| 169808385 | Zechc8                     | 709  | 78    |                                                                                                                                                                                      | 90    | 73.9  | 119.6 | 93.6  | 113.8 | 113.1 | 97.2  | 105.4 |
| 303324586 | Nploc4                     | 608  | 68    | Protein processing in endoplasmic reticulum                                                                                                                                          | 102.4 | 103.2 | 110.6 | 104.8 | 108   | 106.2 | 94.6  | 93    |
| 127138620 | 1190002H<br>23Rik;<br>Rgcc | 137  | 14.7  |                                                                                                                                                                                      | 115.1 | 124.8 | 97.5  | 100.2 | 95.4  | 97    | 107.4 | 103.3 |
| 13384964  | Asf1a                      | 204  | 22.9  |                                                                                                                                                                                      | 88.4  | 81.2  | 86.1  | 81.6  | 122.2 | 120.8 | 106.3 | 118.6 |
| 120587021 | Pigt                       | 582  | 65.7  | Glycosylphosphatidylinositol (GPI)-anchor biosynthesis; Metabolic pathways                                                                                                           | 97.9  | 105.8 | 91.9  | 94.1  | 103.1 | 122.4 | 105   | 80.8  |
| 288541376 | Dis3l2                     | 884  | 99.2  |                                                                                                                                                                                      | 97.5  | 96.2  | 91.2  | 112.6 | 103.4 | 102.3 | 103.9 | 62.6  |
| 110625690 | Recql                      | 648  | 72.4  |                                                                                                                                                                                      | 103.8 | 101.6 | 102.3 | 97.4  | 96.7  | 104.2 | 92.4  | 100.2 |
| 10946722  | Rqed1;<br>Cnot9            | 299  | 33.6  | RNA degradation                                                                                                                                                                      | 90.5  | 115.6 | 97.5  | 88.6  | 103.9 | 94    | 104.1 | 113.1 |
| 164698444 | Frrs1                      | 592  | 66    |                                                                                                                                                                                      | 111.5 | 115   | 114.1 | 115.9 | 110.1 | 110.3 | 99.2  | 88.3  |
| 21312062  | Tmed10                     | 219  | 24.9  |                                                                                                                                                                                      | 93.7  | 93.5  | 83.4  | 90.4  | 103.9 | 109.7 | 109.3 | 107.3 |
| 255304936 | Ptptra                     | 829  | 93.6  |                                                                                                                                                                                      | 84.7  | 96.8  | 83    | 97.3  | 82.2  | 98.6  | 92.9  | 97.9  |
| 6681141   | Dck                        | 260  | 30.3  | Metabolic pathways; Purine metabolism; Pyrimidine metabolism                                                                                                                         | 116.2 | 84    | 118.9 | 92.6  | 90    | 105.9 | 73.9  | 108.8 |
| 66773165  | Acp6                       | 418  | 47.6  |                                                                                                                                                                                      | 109.2 | 106.3 | 108   | 104.9 | 85.9  | 80.6  | 93.1  | 88.4  |
| 58037183  | Eif1ad                     | 170  | 19.5  |                                                                                                                                                                                      |       |       |       |       |       |       |       |       |
| 6681145   | Dscr3                      | 297  | 32.9  |                                                                                                                                                                                      | 102.3 | 101.6 | 92.5  | 99    | 102.3 | 94.2  | 103.6 | 104.7 |
| 237681171 | Smg7                       | 1146 | 127.7 |                                                                                                                                                                                      | 85.4  | 89    | 102.6 | 85    | 122.9 | 95.2  | 109.6 | 82.1  |
| 262050625 | Ssr4                       | 173  | 19    |                                                                                                                                                                                      |       | 111.1 |       | 81.9  |       | 120.1 |       | 88.9  |
| 198278473 | Polr3c                     | 533  | 60.7  | RNA polymerase; Epstein-Barr virus infection; Metabolic pathways; Purine metabolism; Pyrimidine metabolism; Cytosolic DNA-sensing pathway                                            | 98.2  | 94.6  | 96    | 100.9 | 102.5 | 100.2 | 107.9 | 106.9 |
| 145046257 | Rbck1                      | 508  | 57.5  | NOD-like receptor signaling pathway                                                                                                                                                  | 104.6 | 99.9  | 95.5  | 101.1 | 101.1 | 96.9  | 104.1 | 98    |
| 21312378  | Smyd3                      | 428  | 49.1  |                                                                                                                                                                                      | 92.5  |       | 77.1  |       | 113.2 |       | 108.9 |       |
| 160948569 | Rgs3                       | 966  | 106.2 | Axon guidance                                                                                                                                                                        | 101   | 99    | 95.8  | 104.4 | 99.3  | 93.5  | 98.5  | 89.9  |
| 27754071  | Iah1                       | 249  | 28    |                                                                                                                                                                                      | 117.2 |       | 119.2 |       | 75.9  |       | 86.8  |       |

|           |                        |      |       |                                                                                                                                                                                                                                                                |       |       |       |       |       |       |       |       |
|-----------|------------------------|------|-------|----------------------------------------------------------------------------------------------------------------------------------------------------------------------------------------------------------------------------------------------------------------|-------|-------|-------|-------|-------|-------|-------|-------|
| 161760636 | Lyn                    | 512  | 58.8  | Epstein-Barr virus infection; Chemokine signaling pathway; Platelet activation; B cell receptor signaling pathway; Fc gamma R-mediated phagocytosis; Long-term depression; NF-kappa B signaling pathway; Fc epsilon RI signaling pathway; Viral carcinogenesis | 141   |       | 126   |       | 97.4  |       | 77.4  |       |
| 17298686  | Pip4k2c                | 421  | 47.3  | Regulation of actin cytoskeleton; Inositol phosphate metabolism; Phosphatidylinositol signaling system                                                                                                                                                         | 106   | 102.2 | 94.9  | 107.1 | 101.1 | 107   | 102   | 99.4  |
| 9790217   | 1110004F10Rik          | 181  | 20    |                                                                                                                                                                                                                                                                | 97.6  | 102.6 | 80.4  | 108.6 | 102.6 | 99.4  | 124   | 115.2 |
| 157838011 | 5730419109Rik; C2cd5   | 1016 | 111.6 |                                                                                                                                                                                                                                                                | 106.7 | 100.9 | 98.4  | 97.2  | 86.9  | 90.3  | 94.2  | 108.3 |
| 6678519   | Uros                   | 265  | 28.5  | Metabolic pathways; Porphyrin and chlorophyll metabolism                                                                                                                                                                                                       | 113   | 114   | 101.1 | 116.1 | 102   | 89.7  | 87.3  | 88.6  |
| 31982147  | H6pd                   | 797  | 89.9  |                                                                                                                                                                                                                                                                | 97.4  | 114.7 | 90    | 94    | 105.7 | 105.4 | 102.8 | 95.5  |
| 294831970 | Slc25a22               | 323  | 34.6  |                                                                                                                                                                                                                                                                | 97.4  | 107   | 97.2  | 95.2  | 107.4 | 104.7 | 105.3 | 103.1 |
| 6679457   | Prg2                   | 223  | 24.2  | Asthma                                                                                                                                                                                                                                                         | 130.5 | 145.3 | 181.2 | 211.4 | 67.1  | 62.7  | 76.4  | 68.3  |
| 172072590 | Ncdn                   | 729  | 78.8  |                                                                                                                                                                                                                                                                | 84.5  | 90.7  | 87.5  | 86.4  | 113.3 | 125.3 | 116.8 | 107.4 |
| 312261269 | Rabgef1                | 491  | 56.8  |                                                                                                                                                                                                                                                                | 102.2 |       | 98.4  |       | 100.5 |       | 103.2 |       |
| 114053325 | Usp48                  | 1052 | 120.6 |                                                                                                                                                                                                                                                                | 100.2 | 93.9  | 107.4 | 108.9 | 98.7  | 105.3 | 105.3 | 102.2 |
| 13507680  | Uck2                   | 261  | 29.4  | Metabolic pathways; Pyrimidine metabolism; Drug metabolism - other enzymes                                                                                                                                                                                     | 79.8  | 77.6  | 80.7  | 80.6  | 123.7 | 129.3 | 132.2 | 126.5 |
| 39930325  | Kif15                  | 1387 | 160   |                                                                                                                                                                                                                                                                |       | 78.8  |       | 65.6  |       | 136.6 |       | 151.1 |
| 225543336 | Elf4                   | 655  | 70.8  |                                                                                                                                                                                                                                                                | 108.4 | 111.6 | 96.4  | 97.3  | 95    | 94.8  | 93.2  | 87.8  |
| 54020730  | Efr3a                  | 819  | 92.6  |                                                                                                                                                                                                                                                                | 91.4  | 109.6 | 98.9  | 91.4  | 114.8 | 103   | 90.3  | 102.7 |
| 21105853  | Plac8                  | 112  | 12.3  |                                                                                                                                                                                                                                                                |       |       |       |       |       |       |       |       |
| 10946934  | Thap11                 | 305  | 33.3  |                                                                                                                                                                                                                                                                | 107.4 | 100.9 | 112.4 | 104.7 | 86.5  | 93    | 103.4 | 100.5 |
| 28893421  | Xpnpep3                | 386  | 43.3  |                                                                                                                                                                                                                                                                | 105   | 100.9 | 103.6 | 102   | 98.7  | 110.8 | 107.3 | 112.6 |
| 124249075 | Mob3a                  | 217  | 25.5  |                                                                                                                                                                                                                                                                | 135.1 | 139.2 | 114.2 | 120.2 | 75.7  | 69.2  | 69.5  | 65.7  |
| 26024336  | Rps27; Gm9846; Rps27rt | 84   | 9.5   | Ribosome                                                                                                                                                                                                                                                       | 84.8  | 83.5  | 90.3  | 96.5  | 112.6 | 109.7 | 124.5 | 118.3 |
| 255918143 | D16H22S680E; Tango2    | 276  | 30.9  |                                                                                                                                                                                                                                                                |       |       |       |       |       |       |       |       |
| 241982740 | Mtx1                   | 461  | 51.3  |                                                                                                                                                                                                                                                                | 89.6  | 88.7  | 104.6 | 106.7 | 134.6 | 133.8 | 112.5 | 108.4 |
| 238018108 | Apobec3                | 429  | 51    |                                                                                                                                                                                                                                                                | 85.8  | 87    | 102.9 | 118.1 | 125.1 | 123.9 | 114.4 | 97.8  |
| 226051832 | Max                    | 160  | 18.2  |                                                                                                                                                                                                                                                                | 115.7 | 116.4 | 100.4 | 99.3  | 84.8  | 83.2  | 113   | 109.5 |
| 262331530 | Ccdc45; Cep95          | 827  | 95.2  |                                                                                                                                                                                                                                                                | 115.7 | 109.1 | 120.4 | 141.7 | 109.7 | 111.3 | 89    | 84.1  |
| 300863087 | Lims1                  | 362  | 41.6  |                                                                                                                                                                                                                                                                | 92.8  | 99    | 91.7  | 89.3  | 100.5 | 97.3  | 100.9 | 104.4 |
| 125625318 | Sp2                    | 613  | 64.9  |                                                                                                                                                                                                                                                                | 102.6 | 98.5  | 110.2 | 102   | 104.4 | 104   | 95.1  | 118.2 |
| 260099645 | Aven                   | 342  | 37.2  |                                                                                                                                                                                                                                                                | 96.9  | 97.9  | 82.7  | 80.3  | 113.7 | 109   | 112.5 | 118.7 |

|           |                               |     |      |                                                                                                                                                                                                                                                                 |       |       |       |       |       |       |       |       |
|-----------|-------------------------------|-----|------|-----------------------------------------------------------------------------------------------------------------------------------------------------------------------------------------------------------------------------------------------------------------|-------|-------|-------|-------|-------|-------|-------|-------|
| 6754550   | Limk2                         | 638 | 72.2 | Regulation of actin cytoskeleton; Axon guidance; Fc gamma R-mediated phagocytosis                                                                                                                                                                               | 125.3 | 109   | 96.6  | 112.2 | 101.1 | 93.9  | 97.5  | 94.2  |
| 71725343  | Mcat                          | 381 | 41.9 | Fatty acid metabolism; Metabolic pathways; Fatty acid biosynthesis                                                                                                                                                                                              | 103.7 | 113   | 101.9 | 100.6 | 100.3 | 113   | 95.3  | 96.2  |
| 6679601   | Rac2                          | 192 | 21.4 | Leukocyte transendothelial migration; Wnt signaling pathway; Regulation of actin cytoskeleton; MAPK signaling pathway; Ras signaling pathway; VEGF signaling pathway; Focal adhesion; Chemokine signaling pathway; Axon guidance; Adherens junction; Sphingosin | 122.4 | 130.4 | 115.5 | 119.7 | 92    | 83    | 84.9  | 76.2  |
| 6680744   | Atp1b3                        | 278 | 31.8 | Pancreatic secretion; Carbohydrate digestion and absorption; Mineral absorption; Protein digestion and absorption; Endocrine and other factor-regulated calcium reabsorption; Thyroid hormone synthesis; Thyroid hormone signaling pathway; Proximal tubule bic | 82.5  | 86    | 82.1  | 78    | 116.2 | 112.9 | 122.3 | 122.7 |
| 13385090  | Cox6b1                        | 86  | 10.1 | Metabolic pathways; Huntington's disease; Non-alcoholic fatty liver disease (NAFLD); Oxidative phosphorylation; Parkinson's disease; Alzheimer's disease; Cardiac muscle contraction                                                                            | 116.3 | 115.5 | 117.9 | 119.4 | 80.3  | 85.9  | 82.9  | 86.1  |
| 226246660 | Dpy30                         | 99  | 11.2 |                                                                                                                                                                                                                                                                 | 112.4 | 116.8 | 103.8 | 105.9 | 93.8  | 95.1  | 104.5 | 92.8  |
| 152963557 | Trmt61a                       | 290 | 31.6 |                                                                                                                                                                                                                                                                 | 105.7 | 99.9  | 83.7  | 92.7  | 113.3 | 94.8  | 103.7 | 96.3  |
| 85861182  | Aldh1a1                       | 501 | 54.4 | Retinol metabolism; Metabolic pathways                                                                                                                                                                                                                          | 82.1  | 57    | 60.2  | 54.7  | 65    | 59.3  | 66.8  | 49.7  |
| 7304947   | Cbx8                          | 362 | 39.8 |                                                                                                                                                                                                                                                                 | 115.5 | 105.6 | 95.5  | 111.1 | 106.2 | 93.9  | 111   | 94.3  |
| 34303979  | Pon2                          | 354 | 39.6 | Metabolic pathways                                                                                                                                                                                                                                              | 110.9 |       | 100   |       | 110.9 |       | 101.2 |       |
| 268370105 | Fam101b;<br>Rflnb             | 216 | 23.4 |                                                                                                                                                                                                                                                                 | 128.5 | 142   | 124.3 | 160.9 | 70.7  | 49    | 79.6  | 56.1  |
| 13385662  | Isoc2b                        | 210 | 23.1 |                                                                                                                                                                                                                                                                 | 96.5  | 95.9  | 105.3 | 98.3  | 93.4  | 97.2  | 96.4  | 102.4 |
| 161016831 | Nfya                          | 347 | 36.9 | Tuberculosis; Antigen processing and presentation                                                                                                                                                                                                               | 102   | 105.4 | 100.1 | 108.8 | 84.4  | 87.7  | 102.9 | 98.2  |
| 21312202  | Triap1                        | 76  | 8.8  |                                                                                                                                                                                                                                                                 | 121.5 |       | 110.6 |       | 79.3  |       | 106.1 |       |
| 149255796 | LOC100048447;<br>LOC102641916 | 228 | 25.6 |                                                                                                                                                                                                                                                                 |       |       |       |       |       |       |       |       |
| 30519881  | Epsti1                        | 314 | 36.1 |                                                                                                                                                                                                                                                                 | 168.6 | 179.3 | 103.8 | 106.5 | 72    | 60.7  | 71.6  | 69.7  |
| 33563378  | Mtmr9                         | 545 | 62.9 |                                                                                                                                                                                                                                                                 | 99.8  | 109.6 | 104.8 | 103.3 | 97.3  | 91.7  | 100.5 | 98    |
| 118026919 | Dph1                          | 438 | 48   |                                                                                                                                                                                                                                                                 |       | 100.7 |       | 112.3 |       | 90.7  |       | 97.7  |
| 21312064  | Syf2                          | 242 | 28.7 | Spliceosome                                                                                                                                                                                                                                                     | 108.5 | 106.7 | 101.9 | 98    | 97    | 97.1  | 107.2 | 106.1 |
| 85540445  | Sf3b5                         | 86  | 10.1 | Spliceosome                                                                                                                                                                                                                                                     | 92.2  | 92.3  | 92.3  | 92.2  | 100.1 | 104.8 | 111.8 | 108.8 |
| 21313623  | Gtpbp8                        | 285 | 31.9 |                                                                                                                                                                                                                                                                 | 107.6 | 105.7 | 103.8 | 104   | 104.2 | 107.5 | 89.1  | 91.6  |
| 162287051 | Irf2                          | 349 | 39.4 |                                                                                                                                                                                                                                                                 | 104.8 | 109.3 | 109.2 | 110.4 | 79.4  | 81.3  | 90.7  | 93.1  |
| 124430549 | Ythdc1                        | 736 | 85.6 |                                                                                                                                                                                                                                                                 | 89.8  | 86.2  | 107   | 85.5  | 105.1 | 110.7 | 105.8 | 108.6 |
| 6678087   | Serpina1e                     | 413 | 45.9 | Complement and coagulation cascades                                                                                                                                                                                                                             | 136.3 | 125.3 | 127.6 | 122.2 | 96.1  | 89.5  | 81.1  | 80.8  |
| 62530192  | Dlgap4                        | 992 | 108  |                                                                                                                                                                                                                                                                 | 107.7 | 99.9  | 113.4 | 112.7 | 90    | 90.1  | 86.2  | 92.8  |
| 21313282  | Ormdl2                        | 153 | 17.4 |                                                                                                                                                                                                                                                                 | 93.2  | 93.9  | 87.5  | 86.6  | 101.8 | 104.1 | 110.1 | 110.6 |

|           |             |      |       |                                                                                                                                                                                                                        |       |       |       |       |       |       |       |       |
|-----------|-------------|------|-------|------------------------------------------------------------------------------------------------------------------------------------------------------------------------------------------------------------------------|-------|-------|-------|-------|-------|-------|-------|-------|
| 124430766 | Uhrf2       | 803  | 90    |                                                                                                                                                                                                                        | 123.9 | 143.1 | 96.3  | 107.9 | 104.4 | 105.4 | 98.4  | 94.3  |
| 262231842 | Bcas3       | 928  | 101   |                                                                                                                                                                                                                        | 107.2 | 104.9 | 78.1  | 84.6  | 107.1 | 106.5 | 88.6  | 98.2  |
| 27229275  | Rnfl14      | 229  | 25.7  |                                                                                                                                                                                                                        | 114.5 | 108.7 | 105.1 | 109.7 | 93.4  | 87.9  | 92.1  | 94.4  |
| 255003810 | Rab3gap2    | 1387 | 154.5 |                                                                                                                                                                                                                        | 92.6  | 96.4  | 93.2  | 97.6  | 121.1 | 104.1 | 107.4 | 108.8 |
| 226062273 | Ifrd1       | 449  | 49.9  |                                                                                                                                                                                                                        | 104.1 | 99.4  | 102.8 | 107.3 | 88.8  | 100.5 | 110   | 103.6 |
| 343962614 | Itch        | 864  | 98.9  | Endocytosis; Ubiquitin mediated proteolysis; TNF signaling pathway; Non-alcoholic fatty liver disease                                                                                                                  | 114.9 | 112.9 | 88.7  | 93.6  | 107.7 | 108.8 | 99.9  | 94.4  |
| 124487251 | Tigd2       | 525  | 59.6  |                                                                                                                                                                                                                        | 111.6 | 106.4 | 105.6 | 103.1 | 88.2  | 106.3 | 95.3  | 83.9  |
| 256985208 | Cog2        | 731  | 82    |                                                                                                                                                                                                                        | 101.7 | 97.2  | 98.6  | 107.7 | 115.2 | 112.2 | 106   | 103.1 |
| 6679685   | Erh         | 104  | 12.3  |                                                                                                                                                                                                                        | 84.6  | 92.8  | 101.6 | 107.4 | 109.3 | 107   | 116.1 | 110.2 |
| 9506555   | Psmgl       | 289  | 33.1  |                                                                                                                                                                                                                        | 89.6  | 83.2  | 88.5  | 83.6  | 105.2 | 115.5 | 108.5 | 125.9 |
| 9790027   | Zmym3       | 1370 | 152.8 |                                                                                                                                                                                                                        | 96.4  | 99.2  | 100.1 | 106.9 | 94.7  | 90.2  | 110.9 | 103.3 |
| 6679201   | Pafah1b3    | 232  | 25.8  | Metabolic pathways; Ether lipid metabolism                                                                                                                                                                             | 116.9 | 120   | 106.2 | 103.9 | 95.3  | 95.4  | 95.3  | 100.4 |
| 58037329  | Mcee        | 178  | 19    | Valine, leucine and isoleucine degradation; Metabolic pathways; Propanoate metabolism; Carbon metabolism; Glyoxylate and dicarboxylate metabolism                                                                      |       |       |       |       |       |       |       |       |
| 262527254 | Kmt2e; Mll5 | 1868 | 204.4 | Lysine degradation                                                                                                                                                                                                     | 98.2  |       | 96.8  |       | 98    |       | 101.5 |       |
| 27370562  | Tbcel       | 424  | 48    |                                                                                                                                                                                                                        | 94.6  | 100.2 | 93.6  | 97.5  | 97.6  | 91.1  | 77    | 64.7  |
| 159110754 | Cog1        | 980  | 109   |                                                                                                                                                                                                                        | 101.6 | 89    | 106.6 | 88.7  | 107.6 | 124.2 | 102.3 | 101.1 |
| 6724311   | Adh1        | 375  | 39.7  | Drug metabolism - cytochrome P450; Retinol metabolism; Metabolic pathways; Fatty acid degradation; Glycolysis / Gluconeogenesis; Chemical carcinogenesis; Tyrosine metabolism; Metabolism of xenobiotics by cytochrome | 114.3 | 105.7 | 110.1 | 110.6 | 85.5  | 88.7  | 80.4  | 74.7  |
| 153945814 | Ptpre       | 699  | 80.6  |                                                                                                                                                                                                                        | 121.8 | 93    | 93.7  | 93.2  | 92.5  | 101.3 | 93.7  | 108.7 |
| 42734463  | Tbcd22a     | 516  | 59.3  |                                                                                                                                                                                                                        | 110.8 | 111.9 | 100.2 | 104.2 | 108.5 | 105.3 | 78.5  | 59.1  |
| 28849905  | Ubash3b     | 638  | 71.4  |                                                                                                                                                                                                                        | 91    | 90.5  | 86.5  | 81.6  | 122.5 | 118.9 | 99.3  | 98.7  |
| 258613873 | Apip        | 241  | 26.9  | Metabolic pathways; Cysteine and methionine metabolism                                                                                                                                                                 | 116.6 | 96.4  | 102   | 113.4 | 90.2  | 124.3 | 75.8  | 98.9  |
| 254692909 | Ttf2        | 1138 | 125.5 | Thyroid hormone synthesis                                                                                                                                                                                              | 102.7 |       | 84.7  |       | 85.9  |       | 142   |       |
| 6677785   | Rpl37a      | 92   | 10.3  | Ribosome                                                                                                                                                                                                               | 77.5  | 85.9  | 95    | 86    | 113.3 | 101.6 | 114.9 | 120.8 |
| 110681714 | Chm         | 662  | 73.6  |                                                                                                                                                                                                                        | 105   | 107.1 | 92.1  | 82.1  | 102.4 | 100.2 | 99.5  | 101.3 |
| 19527226  | Zc3h10      | 435  | 46.1  |                                                                                                                                                                                                                        | 103.8 | 114.6 | 93.5  | 98.3  | 103.5 | 97.8  | 103.4 | 99.1  |
| 31982193  | Fam26f      | 313  | 34.9  |                                                                                                                                                                                                                        |       | 89.3  |       | 93.9  |       | 100.1 |       | 120.2 |
| 47059206  | Rnf181      | 165  | 19.1  |                                                                                                                                                                                                                        | 61.3  | 54.8  | 58.4  | 52.5  | 66.5  | 62    | 380.3 | 423.1 |
| 6678848   | Abcc1       | 1528 | 171.1 | Vitamin digestion and absorption; MicroRNAs in cancer; ABC transporters; Sphingolipid signaling pathway; Antifolate resistance                                                                                         | 107.8 | 93.4  | 101.5 | 83.2  | 115.4 | 114   | 95.2  | 111.3 |
| 22003862  | Pitpnc1     | 268  | 31.8  |                                                                                                                                                                                                                        | 113.5 | 111   | 116.7 | 116.3 | 95.3  | 85.8  | 85    | 85.6  |
| 9055324   | Skap2       | 358  | 40.7  |                                                                                                                                                                                                                        | 107.7 | 99.9  | 107.1 | 103   | 101.6 | 96.9  | 99.2  | 101.9 |
| 160333600 | Fbxo38      | 1194 | 133.8 |                                                                                                                                                                                                                        | 102.7 | 114.8 | 104.2 | 105.8 | 94.1  | 93.1  | 94.7  | 89.6  |

|           |                                             |      |       |                                                                                                                                                                                                                                                                             |       |       |       |       |       |       |       |       |
|-----------|---------------------------------------------|------|-------|-----------------------------------------------------------------------------------------------------------------------------------------------------------------------------------------------------------------------------------------------------------------------------|-------|-------|-------|-------|-------|-------|-------|-------|
| 6753144   | Atp6v0c;<br>Atp6v0c-<br>ps2                 | 155  | 15.8  | Rheumatoid arthritis; Metabolic pathways; Tuberculosis;<br>Lysosome; Phagosome; Oxidative phosphorylation;<br>Synaptic vesicle cycle; Collecting duct acid secretion                                                                                                        | 89.3  | 93.2  | 124.9 | 124.2 | 104   | 99.2  | 84.2  | 80.5  |
| 31982032  | Mrpl21                                      | 216  | 24    | Ribosome                                                                                                                                                                                                                                                                    | 98.5  | 109.7 | 95.4  | 90.6  | 109   | 133   | 118.2 | 125.2 |
| 13384710  | Gar1                                        | 231  | 23.5  | Ribosome biogenesis in eukaryotes                                                                                                                                                                                                                                           | 104.7 | 104.2 | 104   | 101.3 | 96.2  | 99.1  | 92.3  | 89.9  |
| 21313592  | Tomm7                                       | 55   | 6.2   |                                                                                                                                                                                                                                                                             | 95.7  | 144.7 | 114   | 93.2  | 171.1 | 126.9 | 77.9  | 90.2  |
| 110625732 | AI314976;<br>Oard1                          | 152  | 17.1  |                                                                                                                                                                                                                                                                             | 83.9  | 111.3 | 122.2 | 129.4 | 115.8 | 79.3  | 87    | 87.4  |
| 407261777 | Acp1;<br>LOC6312<br>86;<br>LOC1026<br>42088 | 158  | 18.2  | Thiamine metabolism; Metabolic pathways; Adherens<br>junction                                                                                                                                                                                                               | 119.2 | 120.2 | 106.6 | 107.5 | 92.7  | 96.4  | 93.3  | 96.9  |
| 262331526 | Gemin4                                      | 1058 | 120.1 | RNA transport                                                                                                                                                                                                                                                               | 94    | 88.2  | 78    | 88.2  | 117.6 | 111.2 | 125.6 | 126.4 |
| 28076917  | Bap1                                        | 728  | 80.4  |                                                                                                                                                                                                                                                                             |       |       |       |       |       |       |       |       |
| 23956220  | Dcun1d5                                     | 237  | 27.6  |                                                                                                                                                                                                                                                                             | 97.7  | 94.3  | 90.6  | 88.1  | 102   | 103.1 | 114.7 | 118.3 |
| 31981716  | H2-Aa                                       | 256  | 28.1  | Herpes simplex infection; Staphylococcus aureus infection;<br>Rheumatoid arthritis; Allograft rejection; Toxoplasmosis;<br>Tuberculosis; Cell adhesion molecules (CAMs); HTLV-I<br>infection; Intestinal immune network for IgA production;<br>Inflammatory bowel disease ( | 123.2 | 117.5 | 119.9 | 127.1 | 56.4  | 63.7  | 51.3  | 49    |
| 33468953  | Abt1                                        | 269  | 30.6  |                                                                                                                                                                                                                                                                             | 86.8  | 93    | 87    | 91.6  | 113.2 | 108.1 | 112.6 | 104.4 |
| 18640746  | Ptprcap                                     | 197  | 20.4  |                                                                                                                                                                                                                                                                             | 93.7  | 93.6  | 111.5 | 105.9 | 98.3  | 95.3  | 88.3  | 93.5  |
| 6753138   | Atp1b1                                      | 304  | 35.2  | Pancreatic secretion; Carbohydrate digestion and<br>absorption; Mineral absorption; Protein digestion and<br>absorption; Endocrine and other factor-regulated calcium<br>reabsorption; Thyroid hormone synthesis; Thyroid hormone<br>signaling pathway; Proximal tubule bic | 88.5  |       | 85.2  |       | 106.4 |       | 95.2  |       |
| 23956330  | BC029214<br>; Paxx                          | 205  | 22    |                                                                                                                                                                                                                                                                             |       | 113.5 |       | 107.4 |       | 80.9  |       | 83.4  |
| 114431252 | Pou2f1                                      | 793  | 81.6  |                                                                                                                                                                                                                                                                             | 104.4 | 85.3  | 81.4  | 83.4  | 99.4  | 116.4 | 117.1 | 114.1 |
| 6678085   | Serpina1d                                   | 413  | 46    | Complement and coagulation cascades                                                                                                                                                                                                                                         | 133.8 |       | 144.8 |       | 55.7  |       | 59    |       |
| 33468885  | Cacybp                                      | 229  | 26.5  | Wnt signaling pathway                                                                                                                                                                                                                                                       | 84.4  | 83.3  | 92.1  | 90.7  | 118.4 | 118   | 96.9  | 94.4  |
| 6679995   | Ggt1                                        | 568  | 61.5  | Glutathione metabolism; Taurine and hypotaurine<br>metabolism; Metabolic pathways; Arachidonic acid                                                                                                                                                                         | 106.5 |       | 111.5 |       | 81.5  |       | 89    |       |
| 7305529   | Surf2                                       | 257  | 30.3  |                                                                                                                                                                                                                                                                             |       | 121   |       | 96.4  |       | 89.6  |       | 131.5 |
| 13385366  | Pole4                                       | 118  | 12.2  | DNA replication; Metabolic pathways; HTLV-I infection;<br>Purine metabolism; Nucleotide excision repair; Pyrimidine<br>metabolism; Base excision repair                                                                                                                     | 91.2  | 92.3  | 77.4  | 84.8  | 119.9 | 118.9 | 139.8 | 127.1 |
| 120952695 | Galt                                        | 360  | 41.2  | Prolactin signaling pathway; Metabolic pathways; Amino<br>sugar and nucleotide sugar metabolism; Galactose                                                                                                                                                                  | 114.1 | 112.7 | 99.6  | 107.5 | 94.8  | 93.6  | 103.1 | 97.6  |



|           |                            |      |       |                                                                                                                                                                                                                                                                 |       |       |       |       |       |       |       |       |
|-----------|----------------------------|------|-------|-----------------------------------------------------------------------------------------------------------------------------------------------------------------------------------------------------------------------------------------------------------------|-------|-------|-------|-------|-------|-------|-------|-------|
| 158937315 | Akt2                       | 481  | 55.7  | ErbB signaling pathway; FoxO signaling pathway; Acute myeloid leukemia; AGE-RAGE signaling pathway in diabetic complications; mTOR signaling pathway; Cholinergic synapse; Platinum drug resistance; Chagas disease (American trypanosomiasis); T cell receptor | 95.2  | 92.6  | 99.1  | 88.3  | 102.5 | 91.2  | 116.6 | 82.2  |
| 30519991  | Kat5                       | 513  | 58.6  | HTLV-I infection                                                                                                                                                                                                                                                | 97.8  | 110.8 | 98.3  | 98.3  | 92.8  | 99    | 100.1 | 88.2  |
| 7305027   | Eno2                       | 434  | 47.3  | RNA degradation; Metabolic pathways; Biosynthesis of amino acids; Glycolysis / Gluconeogenesis; HIF-1 signaling pathway; Carbon metabolism                                                                                                                      | 125.7 | 141.5 | 109.2 | 85    | 84.5  | 116   | 91.4  | 78.3  |
| 226437663 | Scml4                      | 408  | 44.4  |                                                                                                                                                                                                                                                                 | 105   | 92.1  | 88.6  | 95.9  | 108.5 | 107.4 | 101.7 | 96.9  |
| 13385904  | 1700021F05Rik              | 240  | 27.8  |                                                                                                                                                                                                                                                                 | 129.3 | 99.8  | 88.6  | 97.3  | 81.6  | 104.4 | 98.2  | 105   |
| 61557491  | A1597468; Tmem263          | 115  | 11.5  |                                                                                                                                                                                                                                                                 | 91.6  | 84.9  | 104.4 | 85.8  | 108.8 | 117.6 | 111.8 | 110.5 |
| 148747363 | Lpcat1                     | 534  | 59.7  | Metabolic pathways; Ether lipid metabolism; Glycerophospholipid metabolism                                                                                                                                                                                      |       | 88.6  |       | 81.6  |       | 108.8 |       | 114.6 |
| 254692930 | 2810403A07Rik              | 612  | 64.5  |                                                                                                                                                                                                                                                                 | 112.3 | 111.8 | 98.3  | 86.7  | 87.3  | 93.1  | 118.7 | 98.5  |
| 31543971  | Ykt6                       | 198  | 22.3  | SNARE interactions in vesicular transport                                                                                                                                                                                                                       | 101.9 | 102.4 | 111.4 | 111.8 | 92.5  | 94.8  | 86    | 83.6  |
| 300192993 | Dnajc1                     | 552  | 63.8  | Protein processing in endoplasmic reticulum                                                                                                                                                                                                                     | 94.8  | 97.7  | 83.6  | 86.8  | 115   | 114.3 | 117.5 | 107.2 |
| 34328291  | Nsmce1                     | 280  | 32    |                                                                                                                                                                                                                                                                 | 88.1  | 91.3  | 91    | 84.8  | 113.1 | 115.5 | 108.2 | 100.5 |
| 268370151 | Tcirl1                     | 834  | 93.4  | Rheumatoid arthritis; Metabolic pathways; Tuberculosis; Lysosome; Phagosome; Oxidative phosphorylation; Synaptic vesicle cycle; Collecting duct acid secretion                                                                                                  | 106.4 | 97.1  | 83.2  | 95.1  | 125.7 | 127.6 | 102.6 | 100.8 |
| 76253678  | Med27                      | 311  | 35.3  | Thyroid hormone signaling pathway                                                                                                                                                                                                                               | 116.4 | 103.8 | 98.1  | 95.1  | 105.8 | 107.7 | 83.6  | 84.7  |
| 159032062 | Acp1                       | 158  | 17.9  | Inflammasome metabolism; Metabolic pathways; Adherens junction                                                                                                                                                                                                  | 116.9 | 87.7  | 122.1 | 106.9 | 93.4  | 113.6 | 66.2  | 88.8  |
| 124487311 | Znfx1                      | 1909 | 218.7 |                                                                                                                                                                                                                                                                 | 101.7 |       | 94.7  |       | 120.6 |       | 92.6  |       |
| 124358948 | Ttc5                       | 440  | 48.8  |                                                                                                                                                                                                                                                                 | 99    | 88.8  | 97.2  | 100.8 | 105.7 | 106.3 | 108.1 | 104.4 |
| 390190197 | Gcdh                       | 447  | 49.5  | Tryptophan metabolism; Metabolic pathways; Lysine degradation; Fatty acid degradation                                                                                                                                                                           | 100.6 | 94.1  | 100.6 | 103.8 | 94.7  | 110.7 | 100.9 | 106.7 |
| 31088892  | Anks1                      | 1150 | 125.2 |                                                                                                                                                                                                                                                                 | 115.1 | 101.9 | 105.8 | 105.2 | 93.7  | 97.4  | 97.5  | 95.1  |
| 158186641 | Stau1                      | 495  | 54.8  |                                                                                                                                                                                                                                                                 | 85.7  | 90.9  | 82.3  | 83.4  | 119.9 | 114.4 | 122.1 | 122.7 |
| 407261929 | LOC100046289; LOC102642697 | 109  | 12.5  |                                                                                                                                                                                                                                                                 | 108.8 | 105.7 | 103.8 | 102   | 92.3  | 99.2  | 98.9  | 96.1  |
| 21735441  | Cmc1                       | 106  | 12.5  |                                                                                                                                                                                                                                                                 | 130.1 | 125.5 | 123   | 139.4 | 84.2  | 83.2  | 98.4  | 87.3  |
| 39930447  | 3110009E18Rik              | 126  | 14.6  |                                                                                                                                                                                                                                                                 | 106.6 | 104.5 | 110.9 | 123.4 | 83.1  | 76.2  | 75.9  | 75    |
| 6678487   | Ube2h                      | 183  | 20.6  | Ubiquitin mediated proteolysis                                                                                                                                                                                                                                  | 112.5 | 108.3 | 109.6 | 98.6  | 83.5  | 80    | 71.8  | 62.9  |
| 6753164   | Bckdk                      | 412  | 46.6  |                                                                                                                                                                                                                                                                 | 97.3  |       | 90.3  |       | 129.3 |       | 100   |       |
| 30425136  | Orai1                      | 304  | 33    | Primary immunodeficiency; Platelet activation; Calcium signaling pathway; cAMP signaling pathway; Aldosterone synthesis and secretion; Renin secretion                                                                                                          | 65.5  | 68.8  | 61.2  | 63.5  | 139.4 | 132.6 | 132.9 | 141.2 |

|           |                              |      |       |                                                             |       |       |       |       |       |       |       |       |
|-----------|------------------------------|------|-------|-------------------------------------------------------------|-------|-------|-------|-------|-------|-------|-------|-------|
| 188497650 | Mlec                         | 291  | 32.3  |                                                             | 94.1  | 100.7 | 98.3  | 94.3  | 103.5 | 100.6 | 99.8  | 99.1  |
| 27370038  | Guf1                         | 651  | 72.4  |                                                             | 100.4 | 96.3  | 103   | 100.9 | 98.4  | 92.1  | 98.5  | 101.4 |
| 226693374 | Rblcc1                       | 1588 | 182.2 | Longevity regulating pathway                                | 108.5 | 102.1 | 115.4 | 118.1 | 111.6 | 99.9  | 90.5  | 86.4  |
| 146260276 | I8300120<br>16Rik;<br>Ifit3b | 403  | 47.2  |                                                             | 101.3 | 102   | 92.3  | 99.2  | 113.2 | 107.2 | 105.8 | 106.8 |
| 154146245 | Nsun5                        | 465  | 51    |                                                             | 95.4  |       | 92.8  |       | 112   |       | 107.8 |       |
| 170671724 | Uvrag                        | 698  | 77.5  |                                                             | 103.2 | 111.1 | 103.4 | 101.6 | 81.6  | 88.4  | 96.9  | 91.1  |
| 157909795 | C230081A<br>13Rik;<br>Peak1  | 1735 | 191   |                                                             | 113.3 | 105.2 | 98.9  | 94.4  | 111.5 | 111.9 | 79.3  | 90.8  |
| 7304859   | Adat1                        | 499  | 55.3  |                                                             | 92.1  | 105.7 | 119.3 | 115.2 | 141.1 | 117.1 | 91.5  | 112   |
| 39930429  | Sec62                        | 398  | 45.6  | Protein export; Protein processing in endoplasmic reticulum | 85.4  | 85.9  | 91.8  | 87.5  | 104.7 | 106.2 | 108.2 | 109.9 |
| 61742806  | Gcc2                         | 1680 | 194.4 |                                                             | 106.5 | 97.1  | 93    | 83.7  | 108.3 | 118.9 | 111.7 | 111.1 |
| 19526820  | Rp2h; Rp2                    | 347  | 39.4  |                                                             | 101.5 | 106.7 | 99.4  | 99.7  | 97    | 96.6  | 98.8  | 94.2  |
| 241896855 | Rbm15b                       | 887  | 97    |                                                             | 107.3 | 99.1  | 96.7  | 102.5 | 98.6  | 91.2  | 102.4 | 106.3 |
| 13385902  | Cdca5                        | 264  | 29    | MicroRNAs in cancer                                         | 93.1  | 72.2  | 83.1  | 62.5  | 125.8 | 136.3 | 142.8 | 170.7 |
| 134288861 | Nom1                         | 854  | 95.9  |                                                             | 91.4  | 102.9 | 99    | 103.8 | 104.2 | 105.2 | 110.1 | 106.2 |
| 110625938 | Hspb11                       | 143  | 16.3  |                                                             | 109.4 | 98.3  | 103.3 | 98    | 85.8  | 102.5 | 102.7 | 114.4 |
| 34850059  | Accs                         | 479  | 54.5  |                                                             | 112.8 | 108.2 | 99.7  | 94.3  | 96    | 102.1 | 94.5  | 98.3  |
| 22507329  | E2f4                         | 410  | 43.8  | Cell cycle; TGF-beta signaling pathway                      | 88.7  | 86.1  | 81.7  | 83.9  | 124   | 120.3 | 121.4 | 118.5 |
| 6753182   | Bet1                         | 118  | 13.3  | SNARE interactions in vesicular transport                   | 97.2  | 96.5  | 90.2  | 90.1  | 105.8 | 103.9 | 107.6 | 123.2 |
| 118918400 | Nsd1                         | 2691 | 296.2 | Lysine degradation                                          | 101.5 | 96.8  | 90.8  | 84.9  | 114.5 | 110.5 | 119.9 | 121.8 |
| 158186691 | Qtrt1                        | 403  | 44.1  |                                                             | 92.6  | 92.5  | 106   | 99    | 97    | 106.3 | 81.4  | 78    |
| 13384756  | Eef1e1                       | 174  | 19.8  |                                                             | 90    | 87.2  | 82.7  | 83.2  | 110.3 | 115.4 | 124.6 | 124.1 |
| 253970508 | Scpep1                       | 452  | 50.9  |                                                             | 127.8 | 144.8 | 189   | 171.6 | 96.8  | 95.1  | 82.6  | 83.1  |
| 13386062  | Apool                        | 265  | 29.2  |                                                             | 94.7  | 96.3  | 97.1  | 96.6  | 102.2 | 101.1 | 115.5 | 106.1 |
| 33859785  | Tyw3                         | 257  | 28.6  |                                                             | 114.9 |       | 75    |       | 100.5 |       | 106.8 |       |
| 193788663 | Spcs1                        | 161  | 18.2  | Protein export                                              | 97.1  | 90.1  | 101.4 | 98.2  | 97.3  | 99.6  | 105.9 | 107.7 |
| 158517927 | Adnp2                        | 1165 | 126.7 |                                                             |       | 116.9 |       | 102   |       | 114   |       | 89.3  |
| 226823258 | Dip2b                        | 1574 | 171   |                                                             | 92.7  | 87.4  | 80.6  | 87.9  | 113   | 129.2 | 126.2 | 126   |
| 225543444 | Timmde1                      | 285  | 31.8  |                                                             | 130.2 | 104.9 | 88.8  | 87.2  | 113.2 | 106.5 | 103.2 | 109.2 |
| 71067091  | Sla                          | 297  | 33.5  |                                                             | 95    | 94.6  | 89.7  | 75.4  | 106.4 | 108.6 | 108.1 | 113.3 |
| 145966828 | Ubap1                        | 502  | 55    |                                                             | 111.9 | 111.3 | 93.4  | 107.2 | 99.2  | 92.2  | 105   | 107.2 |
| 194328708 | Oxr1                         | 866  | 95.9  |                                                             | 124.3 | 125.5 | 105.5 | 110.5 | 80.2  | 67.4  | 86.1  | 69.8  |
| 21644587  | Appl2                        | 662  | 73.8  |                                                             |       | 138.9 |       | 110.4 |       | 116.8 |       | 78    |
| 307938353 | Osbp19                       | 723  | 81.7  |                                                             | 100.7 | 99.9  | 88.9  | 90.1  | 106.1 | 99.7  | 95    | 100.1 |
| 27597069  | Prune;<br>Prune1             | 454  | 50.2  | Purine metabolism                                           | 95.1  | 107.8 | 98.6  | 97.7  | 97.3  | 110   | 99.8  | 99.2  |
| 111185916 | Itrip1                       | 555  | 63.2  |                                                             | 115.9 | 106.1 | 99.1  | 106.1 | 102.5 | 101   | 92.9  | 85.9  |

|           |                                |      |       |                                                                                                                                                                                                        |       |       |       |       |       |       |       |       |
|-----------|--------------------------------|------|-------|--------------------------------------------------------------------------------------------------------------------------------------------------------------------------------------------------------|-------|-------|-------|-------|-------|-------|-------|-------|
| 159110817 | Abhd12                         | 398  | 45.2  |                                                                                                                                                                                                        | 113.6 | 93.1  | 94.9  | 87.1  | 94.9  | 103.9 | 98.1  | 115   |
| 27753998  | Nudt9                          | 350  | 38.6  | Purine metabolism                                                                                                                                                                                      | 99.5  | 101.5 | 102.5 | 95.6  | 116.5 | 112.6 | 67.3  | 72.6  |
| 25742730  | Rpl32;<br>Rpl32p               | 135  | 15.9  | Ribosome                                                                                                                                                                                               | 98    | 92.7  | 93.7  | 93.6  | 113.3 | 106.3 | 101.4 | 118.4 |
| 164518942 | Dad1                           | 113  | 12.5  | Metabolic pathways; N-Glycan biosynthesis; Protein processing in endoplasmic reticulum                                                                                                                 | 106   | 97.7  | 84.8  | 87.9  | 122   | 100.4 | 96.9  | 106.9 |
| 6679441   | Ppic                           | 212  | 22.8  |                                                                                                                                                                                                        | 103.8 | 97.6  | 89.2  | 97.4  | 107.3 | 100.5 | 118.3 | 117.2 |
| 170763496 | Pcm1                           | 2025 | 228.7 |                                                                                                                                                                                                        | 100.9 | 84.8  | 93.5  | 76.7  | 100.8 | 98.2  | 96    | 131   |
| 23956376  | Ino80e                         | 205  | 21.4  |                                                                                                                                                                                                        | 104   | 122.1 | 98.4  | 107.9 | 99.9  | 93.5  | 110.4 | 101.4 |
| 27370042  | Sdad1                          | 687  | 79.5  |                                                                                                                                                                                                        | 91.4  | 81    | 93.9  | 91.1  | 104.8 | 115.4 | 113.9 | 120.9 |
| 6753516   | Cradd                          | 199  | 22.6  |                                                                                                                                                                                                        | 105   | 109   | 109.5 | 103.9 | 105   | 101   | 100.8 | 97.2  |
| 13384714  | Lsm7                           | 103  | 11.6  | RNA degradation; Spliceosome                                                                                                                                                                           | 115.3 | 112.6 | 112   | 112.1 | 81.8  | 82.5  | 93.2  | 93    |
| 51556454  | Itm2a                          | 263  | 29.7  |                                                                                                                                                                                                        | 72.9  | 70.5  | 68.8  | 65.6  | 136.3 | 139.3 | 104.2 | 106.3 |
| 41054952  | Rrm2b                          | 351  | 40.8  | Glutathione metabolism; p53 signaling pathway; Metabolic pathways; Purine metabolism; Pyrimidine metabolism                                                                                            |       |       |       |       |       |       |       |       |
| 226494518 | Rpusd3                         | 344  | 38.1  |                                                                                                                                                                                                        |       | 102.4 |       | 100.8 |       | 102   |       | 104.1 |
| 164698448 | Pelo                           | 385  | 43.3  | mRNA surveillance pathway                                                                                                                                                                              | 56.4  | 71.8  | 141.4 | 134.2 | 111.9 | 110.2 | 101   | 97.8  |
| 10946914  | Trappc2l                       | 139  | 16    |                                                                                                                                                                                                        | 112.1 | 102.3 | 95.1  | 113.8 | 97.2  | 96.4  | 98.7  | 97.2  |
| 30794430  | Snx15                          | 337  | 37.7  |                                                                                                                                                                                                        | 114.5 | 115.2 | 95.8  | 100.7 | 96.8  | 101.9 | 94.2  | 94.8  |
| 8393794   | Mtmr1                          | 669  | 75.3  | Metabolic pathways; Inositol phosphate metabolism; Phosphatidylinositol signaling system                                                                                                               | 110.3 | 96.4  | 101   | 105.2 | 108.7 | 116   | 104.7 | 99.8  |
| 27229125  | Coasy                          | 563  | 62    | Metabolic pathways; Pantothenate and CoA biosynthesis                                                                                                                                                  | 102.4 | 103.8 | 101.3 | 95    | 125.2 | 137.6 | 99.4  | 99.4  |
| 264681552 | Tmc6                           | 810  | 90.5  |                                                                                                                                                                                                        | 91.6  | 84.6  | 82.1  | 95    | 107.3 | 106.4 | 113.9 | 101.2 |
| 34328286  | Sdhb                           | 282  | 31.8  | Citrate cycle (TCA cycle); Metabolic pathways; Huntington's disease; Non-alcoholic fatty liver disease (NAFLD); Oxidative phosphorylation; Parkinson's disease; Alzheimer's disease; Carbon metabolism | 91.7  | 102.6 | 102.6 | 101.2 | 109.4 | 104.1 | 104.8 | 104.4 |
| 84697031  | Tmod2                          | 351  | 39.5  |                                                                                                                                                                                                        | 32.6  | 35.9  | 36    | 38.1  | 158.7 | 175.5 | 166.3 | 171.9 |
| 91206392  | Mpi                            | 423  | 46.5  | Metabolic pathways; Amino sugar and nucleotide sugar metabolism; Fructose and mannose metabolism                                                                                                       | 159.4 | 121.2 | 109   | 105   | 74.4  | 83.1  | 75.5  | 86    |
| 255003837 | Nbas                           | 2356 | 265.6 |                                                                                                                                                                                                        | 97    | 108   | 91.3  | 97.6  | 110   | 115.7 | 108.5 | 101   |
| 336088630 | Nit1                           | 290  | 31.9  |                                                                                                                                                                                                        | 129.8 | 145.8 | 109.5 | 127.7 | 93.7  | 93.6  | 86.5  | 70.7  |
| 13385692  | Gpatch1                        | 930  | 102.9 |                                                                                                                                                                                                        | 111.5 | 107.8 | 99.1  | 97.3  | 100.2 | 91.8  | 96.7  | 97.5  |
| 225579031 | R3hcc1                         | 302  | 33.9  |                                                                                                                                                                                                        | 87    | 94.8  | 72.5  | 84.1  | 102.7 | 123.9 | 144.7 | 120.9 |
| 164663902 | Slain2                         | 607  | 65.2  |                                                                                                                                                                                                        | 117.2 | 102.8 | 100.9 | 106.8 | 107.1 | 100   | 79.4  | 76.9  |
| 358679356 | Mbnl1                          | 255  | 27.2  |                                                                                                                                                                                                        | 99.8  | 95.9  | 95.9  | 93.1  | 103.8 | 123.3 | 113.2 | 107.8 |
| 148276983 | 24100020<br>22Rik;<br>Trappc13 | 418  | 46.5  |                                                                                                                                                                                                        | 102.1 |       | 101.4 |       | 97.5  |       | 95    |       |
| 27532963  | Epc1                           | 813  | 90.4  |                                                                                                                                                                                                        | 111.2 | 105.6 | 104.7 | 98.9  | 94.8  | 96.9  | 89    | 93.1  |
| 169808427 | Fuca1                          | 452  | 52.2  | Lysosome; Other glycan degradation                                                                                                                                                                     | 108.9 | 90.1  | 95.7  | 110.5 | 90.9  | 107.4 | 108.3 | 98.8  |

|           |                              |      |       |                                                                                                |       |       |       |       |       |       |       |       |
|-----------|------------------------------|------|-------|------------------------------------------------------------------------------------------------|-------|-------|-------|-------|-------|-------|-------|-------|
| 123702129 | D330012F<br>22Rik;<br>Gdngp1 | 386  | 42.5  |                                                                                                | 117.3 | 120.8 | 95.1  | 95.8  | 118.9 | 119.3 | 94.5  | 98.5  |
| 30725786  | Lmf2                         | 702  | 79.9  |                                                                                                | 93.5  | 106.9 | 82.2  | 95.2  | 122.7 | 116.7 | 112.3 | 103.8 |
| 22122411  | BC027231<br>; Nepro          | 564  | 63.4  |                                                                                                | 104.5 | 101.3 | 98.4  | 95.8  | 108.9 | 112   | 73    | 76.1  |
| 186287294 | Zyg11b                       | 744  | 83.9  |                                                                                                | 83.6  | 98.5  | 77.9  | 91.7  | 74.2  | 91.7  | 77.5  | 98.7  |
| 19527068  | Nusap1                       | 427  | 48.5  |                                                                                                | 89.7  | 83    | 85    | 71.6  | 124.5 | 131   | 145.5 | 156   |
| 29244114  | Ccz1                         | 480  | 55.5  |                                                                                                | 94    | 95.3  | 96.3  | 96.2  | 96    | 103.8 | 115.9 | 117.4 |
| 256818786 | Papd5                        | 680  | 74.2  |                                                                                                | 81.8  | 82    | 97.6  | 97.1  | 111.2 | 113.2 | 113   | 109.8 |
| 21450075  | Rrp36                        | 226  | 26.6  |                                                                                                | 109.4 | 120.2 | 107.6 | 99.9  | 91.2  | 86.7  | 99.9  | 94.8  |
| 124244104 | Atxn2                        | 1286 | 136.4 |                                                                                                | 99.8  |       | 81.3  |       | 104.4 |       | 122.7 |       |
| 6755570   | Slfn2                        | 378  | 42.4  |                                                                                                | 91.5  | 91.3  | 83.1  | 83.6  | 167.6 | 168   | 94    | 91.4  |
| 124487021 | Esco1                        | 843  | 94.9  |                                                                                                | 96    | 86.5  | 106.5 | 91.2  | 93.6  | 119.6 | 95.7  | 104.7 |
| 28892785  | Galm                         | 342  | 37.8  | Metabolic pathways; Glycolysis / Gluconeogenesis;<br>Galactose metabolism                      |       | 126.8 |       | 132.6 |       | 71.8  |       | 80.7  |
| 9910590   | Med20                        | 212  | 23.2  |                                                                                                | 100.7 | 97.9  | 96    | 95.2  | 99.4  | 89.7  | 119.4 | 116.4 |
| 30794468  | 2410001C<br>21Rik;<br>Rtfcl  | 307  | 33.9  |                                                                                                | 98.3  | 93.5  | 97.6  | 104   | 109.7 | 105.6 | 86.3  | 86.3  |
| 269784760 | Abhd10                       | 297  | 33    |                                                                                                | 105.2 | 112.8 | 95.9  | 96.7  | 106.1 | 98.6  | 110.9 | 97.4  |
| 81295807  | 1300018J<br>18Rik;<br>Selo;  | 667  | 74.2  |                                                                                                |       |       |       |       |       |       |       |       |
| 118026946 | Ncoa3                        | 1403 | 151.9 | Breast cancer; Thyroid hormone signaling pathway;<br>Endocrine resistance                      | 104.7 | 101.8 | 99.2  | 93.5  | 95.1  | 101.7 | 95.7  | 109.1 |
| 27754058  | Zcchc10                      | 178  | 19.1  |                                                                                                | 96.5  | 110.4 | 105.2 | 102.1 | 95.5  | 92.3  | 120.1 | 106.8 |
| 253683458 | Pcyt1a                       | 367  | 41.6  | Metabolic pathways; Glycerophospholipid metabolism;<br>Choline metabolism in cancer            | 96.3  |       | 90.6  |       | 117.5 |       | 111.4 |       |
| 158631191 | Cic                          | 1604 | 163.7 |                                                                                                | 122   |       | 97.7  |       | 103.6 |       | 108.2 |       |
| 71067349  | Rbm12b2                      | 834  | 96.4  |                                                                                                | 91.1  | 97.3  | 91.1  | 86.9  | 113.1 | 109.5 | 105.1 | 101.3 |
| 268837077 | Atxn3                        | 355  | 40.5  | Protein processing in endoplasmic reticulum                                                    | 110.3 |       | 101.2 |       | 102.5 |       | 97.1  |       |
| 134032032 | Ubp1                         | 540  | 60.2  |                                                                                                | 111.9 | 104.5 | 86.6  | 94.4  | 113.5 | 105.5 | 99.5  | 90.8  |
| 84579952  | Ets1                         | 440  | 50.2  | Ras signaling pathway; HTLV-I infection; Dorso-ventral<br>axis formation; Renal cell carcinoma | 103.7 | 104.1 | 101.7 | 110.4 | 85    | 79.7  | 92.9  | 86.5  |
| 6753668   | Dok2                         | 412  | 45.5  |                                                                                                | 91.5  | 85.7  | 127.6 | 132.2 | 92.4  | 98.4  | 84.5  | 98.3  |
| 21312058  | Fam125a;<br>Mvb12a           | 271  | 28.7  | Endocytosis                                                                                    | 106.2 | 105   | 113.9 | 100.9 | 87.4  | 95.9  | 82.2  | 92    |
| 162287033 | Mnt                          | 591  | 63.2  |                                                                                                |       | 98.6  |       | 100.3 |       | 101.4 |       | 96.9  |
| 147901538 | Ogfod1                       | 545  | 62.7  |                                                                                                | 101.5 | 100.2 | 92.6  | 89.2  | 109.9 | 106.2 | 103.6 | 114.9 |
| 255708413 | Katna1                       | 493  | 56.2  |                                                                                                | 92.1  | 87    | 81.9  | 68.1  | 129.7 | 127.5 | 111.9 | 103.7 |
| 29825827  | Vps26b                       | 336  | 39.1  | Endocytosis                                                                                    | 103.8 | 113.2 | 105.9 | 118.8 | 94.9  | 107.4 | 94.2  | 80.3  |

|           |                                |      |       |                                                                                           |       |       |       |       |       |       |       |       |
|-----------|--------------------------------|------|-------|-------------------------------------------------------------------------------------------|-------|-------|-------|-------|-------|-------|-------|-------|
| 26787989  | Mrpl28                         | 257  | 30.2  | Ribosome                                                                                  | 95.4  |       | 93.2  |       | 107.1 |       | 116.3 |       |
| 227499255 | Pus3                           | 481  | 55.5  |                                                                                           | 123.5 | 93.5  | 83.1  | 80.4  | 88.6  | 88    | 110.7 | 112.6 |
| 205360836 | Btbd11                         | 1109 | 121.5 |                                                                                           | 126.8 | 114.4 | 90.1  | 98.2  | 108.8 | 91.8  | 83.4  | 84.6  |
| 121247390 | Zfp143                         | 637  | 69    |                                                                                           | 100.9 | 106   | 86.8  | 109.4 | 113.5 | 92.2  | 91.1  | 95.7  |
| 225703041 | Fastkd5                        | 807  | 91.6  |                                                                                           | 104.8 | 112.8 | 85.2  | 81.9  | 113.5 | 95.5  | 116.3 | 122.5 |
| 161016782 | Foxp4                          | 685  | 74    |                                                                                           | 93.2  | 97.3  | 93    | 93.1  | 121.2 | 114.5 | 117   | 115.1 |
| 117320529 | Slc4a7                         | 1131 | 127.1 |                                                                                           | 113.7 |       | 79.5  |       | 123.1 |       | 111.6 |       |
| 28201958  | Rhof                           | 211  | 23.6  |                                                                                           | 123.5 | 108.8 | 100.2 | 105   | 108   | 94.5  | 94.3  | 102.2 |
| 74024924  | Suox                           | 546  | 60.7  | Sulfur metabolism                                                                         |       | 103.3 |       | 123.3 |       | 86.4  |       | 80.7  |
| 31981458  | Glrx                           | 107  | 11.9  |                                                                                           | 93.2  | 89.1  | 109   | 120.5 | 85.2  | 77.4  | 97.4  | 95.8  |
| 31980844  | Dhrs1                          | 313  | 34    |                                                                                           | 87.3  | 78    | 93.6  | 94.7  | 143.3 | 155.1 | 112.9 | 111.5 |
| 27754138  | Med11                          | 117  | 13.1  |                                                                                           | 90.8  | 115   | 94.8  | 95.2  | 119   | 102.4 | 100.7 | 107.6 |
| 31980802  | Ndufaf1                        | 330  | 38    |                                                                                           | 109.3 | 103.7 | 90.4  | 90.2  | 118.6 | 96.6  | 108.5 | 104.9 |
| 62899041  | Tyw1                           | 721  | 81.5  |                                                                                           | 92.2  |       | 83.9  |       | 111.6 |       | 107.8 |       |
| 58037255  | Brox                           | 411  | 46.2  |                                                                                           | 105.9 |       | 102.4 |       | 96    |       | 103.6 |       |
| 19923070  | Tecr                           | 308  | 36.1  | Fatty acid metabolism; Fatty acid elongation; Biosynthesis of unsaturated fatty acids     | 101.6 | 93.9  | 86.6  | 89.4  | 105.1 | 106.2 | 109.8 | 97.2  |
| 39540508  | Trim14                         | 440  | 49.6  |                                                                                           | 113.6 | 115.7 | 115.2 | 109.9 | 103.8 | 95.4  | 87.6  | 90.1  |
| 56699423  | Nedd4                          | 887  | 102.6 | Endocytosis; Ubiquitin mediated proteolysis; Epstein-Barr virus infection                 | 106.4 |       | 93    |       | 96.5  |       | 87.5  |       |
| 9790039   | Bloc1s6                        | 172  | 19.7  |                                                                                           | 105.6 |       | 82.6  |       | 99.4  |       | 80.8  |       |
| 227116273 | Dctn3                          | 186  | 21    |                                                                                           | 107.1 | 98.3  | 110.1 | 105.5 | 98.8  | 85.2  | 79.2  | 94.6  |
| 6680848   | Casp2                          | 452  | 50.6  | Apoptosis                                                                                 | 99.7  | 97.9  | 93.3  | 86.9  | 99.9  | 124.2 | 100.4 | 101.4 |
| 226437597 | Sfrs18;<br>Pnlsr               | 814  | 93.1  |                                                                                           | 97    | 98.5  | 93.1  | 90.6  | 94.9  | 90.8  | 116.9 | 101.9 |
| 31542873  | Gabarapl2                      | 117  | 13.7  | FoxO signaling pathway; GABAergic synapse; NOD-like receptor signaling pathway; Autophagy | 91.7  | 91.8  | 87.8  | 92.2  | 127.8 | 118.9 | 135.5 | 127   |
| 6680488   | Itgb1bp1                       | 200  | 21.6  |                                                                                           | 114.9 | 85.5  | 101.8 | 88.8  | 108   | 114.7 | 102.8 | 111.5 |
| 21311883  | Rnaset2a;<br>Rnaset2b          | 259  | 29.6  |                                                                                           | 120   | 120.1 | 109.8 | 109.4 | 83.1  | 81    | 90.8  | 91.4  |
| 242118003 | Wdr81                          | 1934 | 211.8 |                                                                                           | 102.6 | 116.7 | 101.5 | 103.7 | 102.8 | 107.8 | 102   | 89.2  |
| 22296593  | Bcl7a                          | 210  | 22.8  |                                                                                           | 131.2 | 127.7 | 113.8 | 114.7 | 91.1  | 85.3  | 81.5  | 85.4  |
| 118403322 | Acad8                          | 413  | 45.1  | Valine, leucine and isoleucine degradation; Metabolic pathways                            | 113.3 | 106.4 | 90.2  | 97.1  | 111.6 | 101.7 | 94    | 97.2  |
| 30425054  | Unc119b                        | 251  | 28.3  |                                                                                           | 97.9  |       | 94.3  |       | 101.5 |       | 106.3 |       |
| 9845236   | Naa10                          | 235  | 26.5  |                                                                                           | 123.1 | 91.9  | 117.8 | 86    | 89.4  | 113.7 | 102.4 | 117.8 |
| 11545735  | Msl3                           | 466  | 53.5  |                                                                                           | 101.9 | 99.1  | 103.7 | 102.8 | 97.3  | 106.9 | 96.5  | 94.3  |
| 67846109  | Timm9                          | 89   | 10.3  |                                                                                           | 101.4 |       | 107.8 |       | 137.1 |       | 95.8  |       |
| 37537562  | 170004711<br>7Rik2;<br>Fam177a | 207  | 23.6  |                                                                                           | 105.9 | 104.9 | 97.7  | 103.5 | 96.4  | 101.9 | 113.7 | 108.7 |

|           |               |      |       |                                                                                                                                                                                                                                                             |       |       |       |       |       |       |       |       |
|-----------|---------------|------|-------|-------------------------------------------------------------------------------------------------------------------------------------------------------------------------------------------------------------------------------------------------------------|-------|-------|-------|-------|-------|-------|-------|-------|
| 41235733  | Lym4          | 91   | 10.8  |                                                                                                                                                                                                                                                             | 91.9  | 95.7  | 102.4 | 97.1  | 107.6 | 105.8 | 113.5 | 106.3 |
| 85702355  | Bicd2         | 851  | 96.6  |                                                                                                                                                                                                                                                             | 100.8 | 99.8  | 100.6 | 97.2  | 99.4  | 116.4 | 110.9 | 109.9 |
| 348041246 | Spata511      | 747  | 80.7  |                                                                                                                                                                                                                                                             |       |       |       |       |       |       |       |       |
| 13384798  | Lage3         | 148  | 15.8  |                                                                                                                                                                                                                                                             |       | 131.6 |       | 103.9 |       | 108.9 |       | 85    |
| 13385670  | Mrps34        | 218  | 25.8  |                                                                                                                                                                                                                                                             | 88.4  | 87.9  | 94.5  | 94.6  | 119.3 | 122.5 | 118   | 111.7 |
| 19526940  | Nmd3          | 503  | 57.6  | Ribosome biogenesis in eukaryotes; RNA transport                                                                                                                                                                                                            | 86.2  | 94.8  | 87.1  | 87.7  | 98    | 116.9 | 111.5 | 98.2  |
| 19527270  | Adi1          | 179  | 21.5  | Metabolic pathways; Cysteine and methionine metabolism                                                                                                                                                                                                      | 113   | 113.6 | 101.4 | 101.3 | 95.2  | 96.9  | 92.9  | 91.6  |
| 12963507  | Rce1          | 329  | 35.8  | Terpenoid backbone biosynthesis                                                                                                                                                                                                                             | 106.4 | 94.8  | 105.3 | 92    | 123.1 | 109.4 | 86.5  | 105.4 |
| 113199769 | Nfatc3        | 1076 | 115.5 | Oxytocin signaling pathway; Wnt signaling pathway; T cell receptor signaling pathway; MAPK signaling pathway; Hepatitis B; Axon guidance; HTLV-I infection; B cell receptor signaling pathway; cGMP-PKG signaling pathway; Th1 and Th2 cell differentiation | 98.7  | 109.4 | 97.4  | 111.7 | 83    | 94.8  | 93    | 87.7  |
| 67846115  | Zfp787        | 381  | 40.5  |                                                                                                                                                                                                                                                             |       |       |       |       |       |       |       |       |
| 7657397   | Nr4a3         | 627  | 68.4  | Transcriptional misregulation in cancer                                                                                                                                                                                                                     | 64.7  | 61.3  | 64    | 59.1  | 182   | 156.3 | 174.1 | 146   |
| 126517491 | Tmsb15b1      | 45   | 5.2   |                                                                                                                                                                                                                                                             | 127.9 | 120.2 | 131   | 132.2 | 65.4  | 72    | 83.7  | 74.1  |
| 13259376  | 2310033P09Rik | 260  | 29.3  |                                                                                                                                                                                                                                                             | 104   |       | 104.9 |       | 94.1  |       | 88.8  |       |
| 164698417 | Brd1          | 1189 | 133.3 |                                                                                                                                                                                                                                                             | 99.7  | 103.2 | 101.4 | 101.5 | 106.2 | 106.2 | 97.8  | 99.6  |
| 148540073 | Ddx20         | 825  | 91.7  | RNA transport                                                                                                                                                                                                                                               | 132.4 | 96.7  | 96.9  | 84.8  | 110.5 | 129.6 | 106.4 | 112.3 |
| 24415990  | Phf5a         | 110  | 12.4  | Spliceosome                                                                                                                                                                                                                                                 | 99.9  | 100.5 | 90    | 96.9  | 89    | 90.7  | 115   | 113.7 |
| 6755234   | Brd7          | 651  | 74    |                                                                                                                                                                                                                                                             | 101.1 | 104.1 | 100.1 | 120.4 | 88.8  | 96.8  | 107.2 | 98.5  |
| 31559817  | Topbp1        | 1515 | 168.8 | Homologous recombination                                                                                                                                                                                                                                    | 80.1  | 79.3  | 70.8  | 71.6  | 131.7 | 139   | 138.4 | 135.6 |
| 21312936  | Mrpl13        | 178  | 20.7  | Ribosome                                                                                                                                                                                                                                                    | 95.9  | 95.5  | 90.4  | 90    | 113.9 | 110.3 | 109.3 | 120.8 |
| 13385778  | Ube2r2        | 238  | 27.1  | Herpes simplex infection; Ubiquitin mediated proteolysis                                                                                                                                                                                                    | 115.4 | 105.6 | 101.6 | 96.2  | 88.8  | 95.8  | 104.3 | 105.2 |
| 27369904  | Pggt1b        | 377  | 42.3  |                                                                                                                                                                                                                                                             | 118.5 | 116.7 | 105.4 | 96.8  | 94.9  | 96.7  | 74.8  | 115.8 |
| 6755314   | Dpf2          | 391  | 44.2  |                                                                                                                                                                                                                                                             | 93.6  | 97.2  | 99.2  | 99.4  | 113.8 | 101.1 | 92    | 95.9  |
| 19527194  | Cog4          | 785  | 88.6  |                                                                                                                                                                                                                                                             | 91.3  | 106.9 | 93.9  | 86.3  | 101.2 | 110.2 | 93.7  | 96.4  |
| 21313138  | Gstk1         | 226  | 25.7  | Glutathione metabolism; Drug metabolism - cytochrome P450; Chemical carcinogenesis; Metabolism of xenobiotics by cytochrome P450; Peroxisome                                                                                                                | 111.6 | 100.6 | 101.7 | 107.2 | 89.7  | 101.6 | 97.3  | 149.1 |
| 254675126 | 2010300C02Rik | 1175 | 125.8 |                                                                                                                                                                                                                                                             | 98.6  |       | 115.8 |       | 95.6  |       | 95.8  |       |
| 254553438 | Thumpd2       | 528  | 57.6  |                                                                                                                                                                                                                                                             | 100   | 131.3 | 102.8 | 104.8 | 80.4  | 78.3  | 88.2  | 83.6  |
| 21703908  | Paip1         | 400  | 45.7  | RNA transport                                                                                                                                                                                                                                               | 102.3 | 107.1 | 94.3  | 92.3  | 106.4 | 101.4 | 101.7 | 101.5 |
| 27545207  | Twistnb       | 330  | 36.7  | RNA polymerase; Metabolic pathways; Purine metabolism; Pyrimidine metabolism                                                                                                                                                                                | 102.8 | 98.2  | 96.7  | 97.2  | 109   | 109.9 | 87.3  | 90.6  |
| 113195690 | Man2b1        | 1013 | 114.6 | Lysosome; Other glycan degradation                                                                                                                                                                                                                          |       | 114.9 |       | 106.2 |       | 103.3 |       | 92.2  |
| 6678383   | Tnfrsf18      | 228  | 25.3  | Cytokine-cytokine receptor interaction                                                                                                                                                                                                                      | 73.2  | 72    | 62    | 66.9  | 143.1 | 145.4 | 145.9 | 134.9 |
| 109134357 | Clasrp        | 668  | 76.8  |                                                                                                                                                                                                                                                             | 117.9 | 108.8 | 95.6  | 100.6 | 104.1 | 92.5  | 100.4 | 108   |

|           |                                                               |      |       |                                                                                                                                                                                                                                                                 |       |       |       |       |       |       |       |       |
|-----------|---------------------------------------------------------------|------|-------|-----------------------------------------------------------------------------------------------------------------------------------------------------------------------------------------------------------------------------------------------------------------|-------|-------|-------|-------|-------|-------|-------|-------|
| 77682555  | Xdh                                                           | 1335 | 146.5 | Caffeine metabolism; Metabolic pathways; Purine metabolism; Drug metabolism - other enzymes; Peroxisome                                                                                                                                                         | 126.3 | 124   | 106.6 | 96.7  | 100.2 | 94.6  | 96.7  | 84.5  |
| 160333495 | Gm14446;<br>Ifit1bl1                                          | 470  | 54.4  | Herpes simplex infection; Hepatitis C                                                                                                                                                                                                                           | 93    |       | 109.3 |       | 109.2 |       | 90.2  |       |
| 58037123  | Tmem126<br>b                                                  | 230  | 25.4  |                                                                                                                                                                                                                                                                 | 98.1  | 88.2  | 95.7  | 103.5 | 117.8 | 112   | 107.9 | 112.2 |
| 29336057  | Ing1                                                          | 279  | 32.1  |                                                                                                                                                                                                                                                                 | 98.6  |       | 124.5 |       | 119.3 |       | 103.9 |       |
| 6680502   | Itm2b                                                         | 266  | 30.2  |                                                                                                                                                                                                                                                                 |       |       |       |       |       |       |       |       |
| 164519082 | N4bp211                                                       | 238  | 28    |                                                                                                                                                                                                                                                                 | 106.6 |       | 102.3 |       | 101.6 |       | 86.6  |       |
| 226958468 | Rfx2                                                          | 717  | 79.1  |                                                                                                                                                                                                                                                                 | 104.5 | 122.8 | 91.8  | 83.4  | 101.9 | 120   | 103.9 | 99.2  |
| 145580629 | Krt78                                                         | 1068 | 112.2 |                                                                                                                                                                                                                                                                 | 83    |       | 84.3  |       | 84.7  |       | 100.9 |       |
| 150010657 | Gm12942;<br>Tmem35b                                           | 150  | 16.2  |                                                                                                                                                                                                                                                                 |       | 110   |       | 96.2  |       | 105.3 |       | 103.8 |
| 13195660  | Gins4                                                         | 223  | 25.9  |                                                                                                                                                                                                                                                                 | 92.7  | 88.2  | 76.4  | 67.4  | 120.1 | 125   | 140.1 | 141.8 |
| 6678225   | Tbca<br>Gng5,                                                 | 108  | 12.8  |                                                                                                                                                                                                                                                                 | 121.4 | 126.1 | 118.2 | 115   | 82.6  | 77.2  | 101.5 | 94.8  |
| 377834168 | Gm15776;<br>Gng5-ps;<br>LOC1000<br>48410;<br>LOC1026<br>41276 | 68   | 7.3   | Morphine addiction; Cholinergic synapse; Retrograde endocannabinoid signaling; Dopaminergic synapse; Ras signaling pathway; GABAergic synapse; Chemokine signaling pathway; Glutamatergic synapse; Pathways in cancer; Alcoholism; PI3K-Akt signaling pathway;  | 89.2  | 93.8  | 96.5  | 96.6  | 100.6 | 99.3  | 104.4 | 100.6 |
| 45592934  | Rac1                                                          | 192  | 21.4  | Leukocyte transendothelial migration; AGE-RAGE signaling pathway in diabetic complications; Wnt signaling pathway; Regulation of actin cytoskeleton; MAPK signaling pathway; Pancreatic secretion; Ras signaling pathway; Amyotrophic lateral sclerosis (ALS);  | 111.5 |       | 119.3 |       | 78.7  |       | 19.7  |       |
| 67189167  | Myh4                                                          | 1939 | 222.7 | Tight junction                                                                                                                                                                                                                                                  |       |       |       |       |       |       |       |       |
| 19482172  | Rdh11                                                         | 316  | 35.1  | Retinol metabolism; Metabolic pathways                                                                                                                                                                                                                          | 76.3  | 90.7  | 90.6  | 86.9  | 117   | 113.4 | 127.8 | 122.1 |
| 226423861 | Phf23                                                         | 401  | 43.5  |                                                                                                                                                                                                                                                                 | 117.2 | 111.6 | 111.4 | 118.8 | 89    | 85.4  | 89.7  | 101.2 |
| 34915988  | Bsg                                                           | 389  | 42.4  |                                                                                                                                                                                                                                                                 | 75    | 71.6  | 68.1  | 65.1  | 128.5 | 132.1 | 162.1 | 166.4 |
| 6755256   | Pygm                                                          | 842  | 97.2  | Insulin signaling pathway; Metabolic pathways; Insulin resistance; Starch and sucrose metabolism; Glucagon signaling pathway                                                                                                                                    |       |       |       |       |       |       |       |       |
| 148539979 | H2-DMa                                                        | 261  | 29    | Herpes simplex infection; Staphylococcus aureus infection; Rheumatoid arthritis; Allograft rejection; Toxoplasmosis; Tuberculosis; Cell adhesion molecules (CAMs); HTLV-I infection; Intestinal immune network for IgA production; Inflammatory bowel disease ( | 168.3 | 150   | 133.4 | 131.5 | 70.5  | 66.2  | 53.5  | 69.2  |
| 67906201  | Rsb1                                                          | 795  | 89.2  |                                                                                                                                                                                                                                                                 | 102.9 | 95.9  | 100.2 | 105.3 | 98.1  | 99.6  | 98.5  | 99.2  |
| 6753540   | Csnk2a2                                                       | 350  | 41.2  | Herpes simplex infection; Wnt signaling pathway; Epstein-Barr virus infection; Adherens junction; Ribosome biogenesis in eukaryotes; NF-kappa B signaling pathway; Tight junction; Measles                                                                      | 100.4 | 89.5  | 93.8  | 97.9  | 125.2 | 105.8 | 73.9  | 96.5  |

|           |                               |      |       |                                                                                                                                                                |       |       |       |       |       |       |       |       |
|-----------|-------------------------------|------|-------|----------------------------------------------------------------------------------------------------------------------------------------------------------------|-------|-------|-------|-------|-------|-------|-------|-------|
| 29789349  | Pan2                          | 1200 | 135.2 | RNA degradation                                                                                                                                                |       | 100.3 |       | 133.1 |       | 99.1  |       | 92.3  |
| 6681255   | Ebp                           | 230  | 26.2  | Steroid biosynthesis; Metabolic pathways                                                                                                                       | 113.1 | 113.8 | 110   | 110   | 95.7  | 100.5 | 81.7  | 84.9  |
| 170932522 | Il27ra                        | 623  | 69    | Jak-STAT signaling pathway                                                                                                                                     | 105.5 | 103   | 84.7  | 74.7  | 140.4 | 150   | 107.3 | 89.9  |
| 31543108  | Lamp2                         | 415  | 45.6  |                                                                                                                                                                | 101.3 | 103.1 | 92.7  | 93.1  | 108.3 | 101.8 | 116   | 116.8 |
| 13384658  | Mrpl17                        | 176  | 20.2  | Ribosome                                                                                                                                                       | 90    | 89.8  | 112.9 | 94    | 116.8 | 131.3 | 70.1  | 63.1  |
| 163965424 | Tmem194;<br>Nemp1             | 437  | 49.8  |                                                                                                                                                                | 99.2  | 95    | 96.7  | 96.9  | 97.7  | 95.3  | 101.3 | 108.9 |
| 27370010  | Galnt12                       | 576  | 66.5  | Metabolic pathways; Mucin type O-glycan biosynthesis                                                                                                           |       | 99.5  |       | 98.4  |       | 101.1 |       | 105.3 |
| 256985114 | Mvd                           | 401  | 44    | Metabolic pathways; Terpenoid backbone biosynthesis                                                                                                            |       |       |       |       |       |       |       |       |
| 124301219 | Agap3                         | 910  | 97.6  |                                                                                                                                                                |       |       |       |       |       |       |       |       |
| 71143116  | Tapt1                         | 564  | 63.9  |                                                                                                                                                                | 89    | 108.1 | 103.1 | 98.6  | 98    | 100.7 | 111.6 | 95.2  |
| 84370278  | Commf6                        | 87   | 9.8   |                                                                                                                                                                | 101   | 109.6 | 96.9  | 88.5  | 100.6 | 94    | 107.9 | 99.9  |
| 6754092   | Gstz1                         | 216  | 24.3  | Metabolic pathways; Tyrosine metabolism                                                                                                                        | 103   |       | 97.3  |       | 91.9  |       | 75.4  |       |
| 194473716 | Kdm3a                         | 1323 | 147.8 |                                                                                                                                                                | 102.1 | 116.7 | 96.3  | 102.4 | 101.7 | 94    | 101.9 | 113.7 |
| 15617197  | Atp6v1g1                      | 118  | 13.7  | mTOR signaling pathway; Rheumatoid arthritis; Metabolic pathways; Phagosome; Oxidative phosphorylation; Synaptic vesicle cycle; Collecting duct acid secretion | 105.7 | 118.1 | 94.7  | 98.2  | 105.3 | 103.8 | 110.4 | 105.9 |
| 226494598 | Wdr7                          | 1489 | 163.3 |                                                                                                                                                                | 98.1  | 99    | 107.8 | 109.9 | 88.6  | 83.3  | 98    | 99    |
| 84042521  | Banfl                         | 89   | 10.1  |                                                                                                                                                                | 101.6 | 122.9 | 103.7 | 85.2  | 92.9  | 70.6  | 110.6 | 89.5  |
| 13384870  | Tmem126<br>a                  | 196  | 21.5  |                                                                                                                                                                | 77.6  | 82.4  | 82.2  | 86.3  | 140.6 | 135.7 | 85.8  | 92.1  |
| 19923056  | Snapi1                        | 136  | 14.9  |                                                                                                                                                                |       |       |       |       |       |       |       |       |
| 113930747 | Atxn7l3b                      | 97   | 10.7  |                                                                                                                                                                | 99.3  | 109.2 | 103.3 | 100.7 | 93.5  | 97.1  | 111   | 108.6 |
| 86439987  | Tsc2                          | 1785 | 198.7 |                                                                                                                                                                | 103.1 | 106.2 | 98.4  | 94.4  | 107.8 | 96.3  | 107.5 | 113.9 |
| 254692865 | Tars2                         | 723  | 81.6  | Aminoacyl-tRNA biosynthesis                                                                                                                                    | 100.4 | 107.3 | 84.3  | 98.9  | 125.9 | 102.6 | 103.7 | 69.4  |
| 183583542 | Egr2                          | 470  | 49.8  | Hepatitis B; HTLV-I infection; Viral carcinogenesis                                                                                                            | 76.4  | 85.8  | 76.1  | 77.2  | 109   | 106.9 | 115.8 | 109.5 |
| 27369902  | Mppe1                         | 397  | 46.1  |                                                                                                                                                                |       | 98.3  |       | 110.7 |       | 107.1 |       | 75.7  |
| 27369894  | Ino80c                        | 191  | 20.4  |                                                                                                                                                                | 95.5  |       | 106.8 |       | 92    |       | 98.4  |       |
| 120952555 | 2310047<br>M10Rik;<br>Borcs6  | 360  | 38    |                                                                                                                                                                | 103.9 | 111.9 | 101.2 | 99.5  | 94.1  | 103.3 | 111.6 | 114.7 |
| 27228985  | Ndufa12                       | 149  | 17.6  | Metabolic pathways; Huntington's disease; Non-alcoholic fatty liver disease (NAFLD); Oxidative phosphorylation; Parkinson's disease; Alzheimer's disease       | 82    | 80.8  | 113.7 | 95.9  | 123.7 | 102.4 | 104   | 96.7  |
| 12963791  | Rdh14                         | 334  | 36.3  |                                                                                                                                                                | 114.9 | 117.1 | 102.6 | 108.5 | 93.4  | 92.1  | 87    | 89.4  |
| 158937256 | 2410091C<br>18Rik;<br>Ndufaf7 | 436  | 48.4  |                                                                                                                                                                | 122.1 | 109.9 | 97.5  | 98.9  | 183   | 135.5 | 94.6  | 101   |
| 50234896  | Ube2o                         | 1288 | 140.7 | Ubiquitin mediated proteolysis                                                                                                                                 |       | 96.2  |       | 78.1  |       | 98.8  |       | 117.1 |
| 295424164 | Whsc1;<br>Nsd2                | 1366 | 152.3 |                                                                                                                                                                | 86.4  |       | 86.2  |       | 136.1 |       | 127.1 |       |
| 13487925  | Akr1c6                        | 323  | 37    |                                                                                                                                                                | 62.3  |       | 46.6  |       | 53.8  |       | 53.9  |       |



|           |                             |      |       |                                                                                                                                                          |       |       |       |       |       |       |       |       |
|-----------|-----------------------------|------|-------|----------------------------------------------------------------------------------------------------------------------------------------------------------|-------|-------|-------|-------|-------|-------|-------|-------|
| 27764875  | Becn1                       | 448  | 51.6  | Apoptosis - multiple species; Autophagy                                                                                                                  | 117.4 | 103.9 | 87.4  | 110.5 | 120.1 | 85.5  | 115.9 | 102.1 |
| 357197163 | Slc30a6                     | 465  | 51.6  |                                                                                                                                                          | 95.8  | 100.3 | 96.4  | 97.9  | 112.4 | 102.6 | 100.4 | 101.1 |
| 22122345  | Tspan14                     | 270  | 30.7  |                                                                                                                                                          | 98.1  | 104.1 | 92.6  | 100   | 92.3  | 102.2 | 101   | 71.7  |
| 189339272 | Baz1a                       | 1552 | 178.1 |                                                                                                                                                          | 101.4 | 90.2  | 87.4  | 85.5  | 114   | 116   | 118.6 | 130.8 |
| 21313674  | Ints12                      | 461  | 48.5  |                                                                                                                                                          | 102.6 | 107.5 | 99.5  | 86.9  | 104.1 | 104.6 | 95.1  | 104.1 |
| 261862282 | Slc2a3                      | 493  | 53.4  |                                                                                                                                                          | 73.4  | 87.9  | 80.4  | 96    | 126.7 | 108.6 | 114.5 | 115.4 |
| 256017165 | Mast3                       | 1305 | 142.5 |                                                                                                                                                          |       | 119.4 |       | 100.1 |       | 82.9  |       | 89.4  |
| 19527322  | Letmd1                      | 360  | 41.7  |                                                                                                                                                          | 110   | 116.2 | 107.9 | 112.2 | 106.5 | 102   | 90.2  | 85.9  |
| 110350660 | Ddrgk1                      | 315  | 36    |                                                                                                                                                          | 96.5  | 111.2 | 89.3  | 98.5  | 109.4 | 88.9  | 115   | 98.3  |
| 261862322 | Kif20a                      | 887  | 99.8  |                                                                                                                                                          | 75.1  | 65.5  | 68.3  | 56.1  | 138.5 | 147.6 | 158.6 | 138.3 |
| 224994271 | Fcho2                       | 809  | 88.7  |                                                                                                                                                          |       | 118.3 |       | 86.6  |       | 101.7 |       | 112.3 |
| 31543938  | Vamp4                       | 141  | 16.3  | SNARE interactions in vesicular transport                                                                                                                | 102.7 | 98.2  | 93.9  | 94.1  | 109.5 | 129   | 82.6  | 71.3  |
| 29825825  | Hid1                        | 788  | 88.7  |                                                                                                                                                          | 120.1 | 116.2 | 114.4 | 116.2 | 81.5  | 86.4  | 86.3  | 89.6  |
| 30725748  | AI467606                    | 225  | 24.5  |                                                                                                                                                          | 114.9 | 87    | 103.9 | 84.1  | 87.2  | 110.9 | 88.3  | 134.5 |
| 27754091  | Gtf3c6                      | 227  | 25.5  |                                                                                                                                                          | 122.2 | 129.6 | 98.8  | 97.9  | 92.6  | 88.2  | 111.8 | 111.3 |
| 85861247  | Ubxn8                       | 277  | 31.5  |                                                                                                                                                          |       | 98.5  |       | 82.7  |       | 110.9 |       | 98.6  |
| 108389163 | Tsen54                      | 525  | 59    |                                                                                                                                                          | 121.1 |       | 101.3 |       | 107.6 |       | 85.6  |       |
| 21312594  | Mpc2                        | 127  | 14.3  |                                                                                                                                                          | 93.3  | 90.7  | 95.6  | 95    | 111.5 | 108.4 | 115.6 | 120.1 |
| 12328816  | Polr1e                      | 434  | 48.8  | RNA polymerase; Metabolic pathways; Purine metabolism; Pyrimidine metabolism                                                                             | 97.4  | 102.6 | 101.3 | 102.2 | 112.6 | 112.9 | 104.9 | 107   |
| 110225360 | Blm                         | 1416 | 158.3 | Homologous recombination; Fanconi anemia pathway                                                                                                         |       |       |       |       |       |       |       |       |
| 84872231  | Enpp4                       | 456  | 51.6  | Purine metabolism                                                                                                                                        | 114.4 | 96.9  | 94.1  | 103.7 | 84.9  | 103.4 | 100.1 | 90.3  |
| 281306757 | Emc6                        | 110  | 12    |                                                                                                                                                          | 97.3  | 94.4  | 113   | 109   | 112.2 | 116.5 | 100.1 | 92.2  |
| 85540456  | Cd226                       | 333  | 38    | Cell adhesion molecules (CAMs)                                                                                                                           | 95.6  | 100.9 | 89.5  | 95.2  | 108.2 | 114.5 | 116.9 | 119.2 |
| 20070422  | Praf2                       | 178  | 19.5  |                                                                                                                                                          | 103.2 | 91.8  | 95.1  | 100.4 | 107   | 104   | 88.1  | 83.7  |
| 31982107  | Pola2                       | 600  | 66.2  | DNA replication; Metabolic pathways; Purine metabolism; Pyrimidine metabolism                                                                            | 78.4  | 97.8  | 74.3  | 92.3  | 112.3 | 107.2 | 125.8 | 100.9 |
| 27754144  | Ndufb5                      | 189  | 21.7  | Metabolic pathways; Huntington's disease; Non-alcoholic fatty liver disease (NAFLD); Oxidative phosphorylation; Parkinson's disease; Alzheimer's disease | 102.7 | 95.8  | 97.5  | 97.3  | 100.8 | 101.9 | 109.8 | 104.7 |
| 116686126 | Fbxo7                       | 523  | 57.6  |                                                                                                                                                          | 79    | 92.4  | 88.7  | 83.3  | 116.7 | 116.9 | 108.4 | 107.6 |
| 13122606  | Tfpt                        | 249  | 28    |                                                                                                                                                          |       |       |       |       |       |       |       |       |
| 21312524  | Cyb5r1                      | 305  | 34.1  | Amino sugar and nucleotide sugar metabolism                                                                                                              | 98.5  |       | 107.8 |       | 103.2 |       | 107.4 |       |
| 19526936  | Lancl2                      | 450  | 50.7  |                                                                                                                                                          | 105.7 | 95.9  | 82.2  | 95.3  | 95.6  | 96.3  | 80.6  | 93.5  |
| 31324539  | Ltv1                        | 470  | 54    |                                                                                                                                                          | 85.5  | 76.2  | 81.2  | 73.9  | 116.5 | 114.1 | 130.4 | 148.1 |
| 110625722 | Opa3                        | 179  | 20.1  |                                                                                                                                                          | 92.2  |       | 103.4 |       | 113.6 |       | 92.3  |       |
| 21450279  | Pet112;<br>Pet112l;<br>Gatb | 557  | 62.1  | Metabolic pathways; Aminoacyl-tRNA biosynthesis                                                                                                          | 102.9 |       | 94.4  |       | 110.3 |       | 113   |       |
| 169790909 | Mrps9                       | 390  | 44.9  | Ribosome                                                                                                                                                 | 94.4  | 88.3  | 96.5  | 86.3  | 108   | 115.2 | 98    | 97.3  |

|           |                            |      |       |                                                                                                                                                                                                                             |       |       |       |       |       |       |       |       |
|-----------|----------------------------|------|-------|-----------------------------------------------------------------------------------------------------------------------------------------------------------------------------------------------------------------------------|-------|-------|-------|-------|-------|-------|-------|-------|
| 298919223 | Fau                        | 133  | 14.4  | Ribosome                                                                                                                                                                                                                    | 90.7  | 89.9  | 92.8  | 100.9 | 96.5  | 95    | 131.5 | 115.5 |
| 23956336  | Pms1                       | 917  | 103.5 |                                                                                                                                                                                                                             | 105.6 | 88.1  | 100.1 | 88.4  | 125.3 | 129   | 101.1 | 91.6  |
| 128485541 | Trim26                     | 545  | 62.8  |                                                                                                                                                                                                                             | 93.2  | 99.7  | 102.4 | 113.9 | 103.6 | 100.6 | 114.9 | 87.2  |
| 11037792  | Nek7                       | 302  | 34.5  | NOD-like receptor signaling pathway                                                                                                                                                                                         | 92    | 92.8  | 101.9 | 105.9 | 85.6  | 101.6 | 95.1  | 94    |
| 146134392 | Nadk2;<br>Nadkd1           | 452  | 50.8  | Metabolic pathways; Nicotinate and nicotinamide metabolism                                                                                                                                                                  | 97.4  | 85    | 113.3 | 98    | 108.6 | 75.9  | 102.5 | 117.1 |
| 9910194   | Dhodh                      | 395  | 42.7  | Metabolic pathways; Pyrimidine metabolism                                                                                                                                                                                   | 91.4  |       | 86.3  |       | 117   |       | 143.4 |       |
| 79750409  | Tsc1                       | 1160 | 128.6 |                                                                                                                                                                                                                             |       | 104.8 |       | 110.3 |       | 84.6  |       | 106.7 |
| 253970415 | Med16                      | 865  | 95.4  |                                                                                                                                                                                                                             | 72.6  | 105.3 | 102.5 | 101.9 | 119   | 96.6  | 115.3 | 114.5 |
| 22122521  | Mgat2                      | 442  | 51    | Metabolic pathways; N-Glycan biosynthesis                                                                                                                                                                                   | 88.4  |       | 86.2  |       | 119.6 |       | 112.7 |       |
| 71480150  | Trp53i11                   | 189  | 20.9  |                                                                                                                                                                                                                             | 101.5 | 101.3 | 99.4  | 91.7  | 97.4  | 100.9 | 79.5  | 70.5  |
| 33859564  | Mrps33                     | 106  | 12.5  |                                                                                                                                                                                                                             | 96.3  | 88.5  | 92.6  | 88.7  | 107.1 | 109   | 122.4 | 129.7 |
| 326937503 | Clptm11                    | 539  | 62.1  |                                                                                                                                                                                                                             | 98.6  |       | 101.4 |       | 106.4 |       | 99.1  |       |
| 283837911 | Os9                        | 672  | 76.1  | Protein processing in endoplasmic reticulum                                                                                                                                                                                 | 95.3  | 90.8  | 96.2  | 98.3  | 116.6 | 106.4 | 121.6 | 120.1 |
| 154146249 | Rptor                      | 1335 | 149.4 |                                                                                                                                                                                                                             | 106.1 | 104.7 | 104.4 | 104.8 | 101.2 | 102.8 | 101.5 | 89.1  |
| 9790055   | Mtch2                      | 303  | 33.5  |                                                                                                                                                                                                                             | 115.8 | 114.5 | 93.4  | 93.4  | 100.2 | 96.4  | 100.8 | 100.7 |
| 31982332  | Glul                       | 373  | 42.1  | GABAergic synapse; Metabolic pathways; Nitrogen metabolism; Biosynthesis of amino acids; Glutamatergic synapse; Alanine, aspartate and glutamate metabolism; Arginine biosynthesis; Glyoxylate and dicarboxylate metabolism | 104.6 | 94.3  | 100.8 | 105.8 | 81.3  | 101.9 | 81.6  | 106.1 |
| 260593696 | Mrps2                      | 291  | 32.3  | Ribosome                                                                                                                                                                                                                    | 106.2 | 91.7  | 99.4  | 92.6  | 118.2 | 107.4 | 75.2  | 115.4 |
| 110625724 | Trip13                     | 432  | 48.3  |                                                                                                                                                                                                                             | 76    | 74.8  | 71.8  | 69.6  | 146.5 | 144.7 | 113.9 | 138.3 |
| 161086973 | Gatad1                     | 266  | 28.5  |                                                                                                                                                                                                                             | 125.8 |       | 101.4 |       | 110.5 |       | 110.1 |       |
| 22122725  | Klc3                       | 508  | 56    | Salmonella infection                                                                                                                                                                                                        |       |       |       |       |       |       |       |       |
| 23956244  | Mrps6                      | 125  | 14.3  | Ribosome                                                                                                                                                                                                                    | 90.6  | 87.3  | 89.2  | 84.9  | 108.5 | 114.3 | 106.6 | 105.1 |
| 38372895  | Tle4                       | 773  | 83.7  |                                                                                                                                                                                                                             |       |       |       |       |       |       |       |       |
| 13928668  | Vti1a                      | 217  | 25    | SNARE interactions in vesicular transport                                                                                                                                                                                   | 104.1 | 106.6 | 86.2  | 98.8  | 95.7  | 96.2  | 105.3 | 103.8 |
| 124486951 | Pbrm1                      | 1704 | 194.6 |                                                                                                                                                                                                                             | 96.2  | 101.2 | 98.1  | 97.5  | 109.3 | 103.9 | 100.5 | 102.8 |
| 66392583  | R3hdm4                     | 262  | 29.6  |                                                                                                                                                                                                                             | 104   | 92.3  | 82.5  | 83.4  | 107   | 116.3 | 105.2 | 99.3  |
| 160358778 | Hmgcr                      | 887  | 97    | Metabolic pathways; Terpenoid backbone biosynthesis; Bile secretion; AMPK signaling pathway                                                                                                                                 | 74.3  | 60.4  | 72    | 65.1  | 152.9 | 152.2 | 133   | 151.5 |
| 27777683  | Gramd1b                    | 878  | 101   |                                                                                                                                                                                                                             | 87.6  | 93    | 65.5  | 68.4  | 143.2 | 138.1 | 141.1 | 140.1 |
| 269995975 | 1110057K<br>04Rik;<br>Ldah | 326  | 37.3  |                                                                                                                                                                                                                             | 117.9 | 100.5 | 84.7  | 91    | 102.1 | 102.6 | 100.8 | 105   |
| 229608951 | Rab711;<br>Rab29           | 204  | 23    |                                                                                                                                                                                                                             | 109.9 | 109.9 | 108.6 | 102.5 | 95.4  | 99.3  | 74.3  | 89.4  |
| 228008361 | Tsen15                     | 168  | 18.5  |                                                                                                                                                                                                                             | 94.5  | 78.3  | 101.1 | 93.7  | 99.1  | 110.2 | 74.9  | 90.5  |
| 23346632  | Gimap6                     | 305  | 34.1  |                                                                                                                                                                                                                             | 113.9 | 104.8 | 81    | 84.8  | 97.7  | 114.8 | 108.6 | 103.9 |
| 256355019 | Erlin1                     | 348  | 39.2  |                                                                                                                                                                                                                             | 110.8 | 99.5  | 90.9  | 89.8  | 107.6 | 112.8 | 99.2  | 110.7 |

|           |                    |     |      |                                                                                                                                                                 |       |       |       |       |       |       |       |       |
|-----------|--------------------|-----|------|-----------------------------------------------------------------------------------------------------------------------------------------------------------------|-------|-------|-------|-------|-------|-------|-------|-------|
| 327315356 | Rxrb               | 524 | 56.3 |                                                                                                                                                                 | 79.8  |       | 107.7 |       | 102   |       | 84.2  |       |
| 6679567   | Ptrf;<br>Cavin1    | 392 | 43.9 |                                                                                                                                                                 |       |       |       |       |       |       |       |       |
| 112817628 | Brd9               | 597 | 66.9 |                                                                                                                                                                 | 94.6  | 95.5  | 96.7  | 93.1  | 113.2 | 117.9 | 98.3  | 112   |
| 114158675 | Serpinb1a          | 379 | 42.5 | Amoebiasis                                                                                                                                                      | 179.5 | 216   | 149.5 | 155.5 | 52.5  | 61.9  | 60.3  | 53    |
| 31542425  | Csnk1e             | 416 | 47.3 | FoxO signaling pathway; Wnt signaling pathway; Hippo signaling pathway; Circadian rhythm; Hippo signaling pathway -multiple species; Hedgehog signaling pathway | 84.2  | 83.8  | 102.5 | 96.6  | 117.8 | 107.4 | 117.2 | 90.3  |
| 13195624  | Ndufa10            | 355 | 40.6 | Metabolic pathways; Huntington's disease; Non-alcoholic fatty liver disease (NAFLD); Oxidative phosphorylation; Parkinson's disease; Alzheimer's disease        | 103.1 | 101.2 | 100.6 | 100.7 | 101.5 | 96.1  | 102.5 | 104.6 |
| 268838948 | Babam1             | 333 | 36.8 | Homologous recombination                                                                                                                                        | 107   | 102.6 | 103.6 | 102.2 | 94    | 99.8  | 98.5  | 95.6  |
| 22122651  | Pbxip1             | 727 | 81.1 |                                                                                                                                                                 | 107   | 135.9 | 101.1 | 88.5  | 96.9  | 115.1 | 98.7  | 109.5 |
| 166091474 | Msl1               | 616 | 67.3 |                                                                                                                                                                 | 143.6 | 120.3 | 102.7 | 91.3  | 89.6  | 92.4  | 90.5  | 87.7  |
| 262263319 | Cst7               | 144 | 16.4 |                                                                                                                                                                 | 90.3  | 100.7 | 112.5 | 109.4 | 95.8  | 96    | 100.7 | 96.8  |
| 21728372  | Alg5               | 324 | 36.8 | Metabolic pathways; N-Glycan biosynthesis                                                                                                                       | 101   | 100.3 | 102.3 | 92.2  | 99.3  | 97.3  | 106.1 | 108.1 |
| 6677833   | S100a10            | 97  | 11.2 |                                                                                                                                                                 | 87.1  | 81.3  | 66.6  | 64.1  | 71.7  | 71.7  | 94.8  | 86    |
| 31982957  | Rnasel             | 735 | 83.2 | Herpes simplex infection; NOD-like receptor signaling pathway; Influenza A; Hepatitis C                                                                         | 100.9 |       | 99.2  |       | 93.3  |       | 99.8  |       |
| 262050650 | Slc9a6             | 702 | 77.9 | Cardiac muscle contraction                                                                                                                                      | 138.1 | 132.4 | 85.9  | 90.3  | 131.4 | 116.2 | 102.5 | 86.8  |
| 109948290 | Rab13              | 236 | 26.3 |                                                                                                                                                                 | 98.7  | 88.5  | 101.3 | 93.7  | 105   | 103.2 | 108.6 | 107.7 |
| 6680854   | Cav1               | 178 | 20.5 | Endocytosis; Focal adhesion; Proteoglycans in cancer; Viral myocarditis; Bacterial invasion of epithelial cells                                                 | 62.6  | 66.2  | 68.5  | 57.9  | 50.3  | 57    | 54.8  | 47.6  |
| 170650659 | Tbcb               | 244 | 27.4 |                                                                                                                                                                 | 89.3  | 89.4  | 89.6  | 85.3  | 106.1 | 103.7 | 117.1 | 122.6 |
| 84452161  | Commd1             | 188 | 21   |                                                                                                                                                                 |       | 104.6 |       | 91.3  |       | 99.4  |       | 104.4 |
| 124487451 | Osbp17             | 791 | 89.9 |                                                                                                                                                                 |       |       |       |       |       |       |       |       |
| 247269773 | Yipf3              | 347 | 38   |                                                                                                                                                                 |       | 98.1  |       | 87.7  |       | 103.2 |       | 110.4 |
| 145207948 | Trim25             | 634 | 71.7 | RIG-I-like receptor signaling pathway; Influenza A; NF-kappa B signaling pathway                                                                                | 94.6  | 95.2  | 88.5  | 104.7 | 102.2 | 98.4  | 120.1 | 106.5 |
| 188219557 | Prc1               | 606 | 70.6 |                                                                                                                                                                 | 96.3  | 93.6  | 78    | 81.1  | 103.9 | 114   | 124.8 | 130.8 |
| 19527310  | Ppif               | 206 | 21.7 | Toxoplasmosis; Huntington's disease; Parkinson's disease; cGMP-PKG signaling pathway; Calcium signaling pathway                                                 | 102.6 | 110.2 | 107.8 | 107.3 | 97.9  | 92.5  | 95    | 93.8  |
| 189491666 | Ddal               | 102 | 11.7 |                                                                                                                                                                 | 152.7 | 155.3 | 112.3 | 124.9 | 104.9 | 103.8 | 116.3 | 107.3 |
| 13386340  | 4632428N<br>05Rik; | 309 | 33.6 |                                                                                                                                                                 |       | 101.7 |       | 95.5  |       | 102.8 |       | 106.4 |
| 407263448 | Gm4887             | 390 | 44.4 |                                                                                                                                                                 | 83.5  | 96    | 104.7 | 99.6  | 111.2 | 102.4 | 108.8 | 110.6 |
| 27370102  | Hirip3             | 601 | 65.2 |                                                                                                                                                                 | 92.3  | 110.6 | 92.1  | 93.3  | 126.1 | 109.1 | 98.9  | 84.8  |
| 133893030 | Erich1             | 332 | 37.3 |                                                                                                                                                                 | 99.1  | 92.1  | 90    | 94.8  | 98.5  | 102.1 | 107.1 | 113.6 |
| 254540074 | Dnajc17            | 303 | 34.4 |                                                                                                                                                                 | 106.2 |       | 101.4 |       | 104.7 |       | 103.1 |       |
| 6755987   | Vtn                | 478 | 54.8 | Focal adhesion; Complement and coagulation cascades; Proteoglycans in cancer; ECM-receptor interaction; PI3K-Akt signaling pathway                              | 112   | 133   | 140.9 | 154.6 | 97.3  | 94.1  | 91.8  | 85.9  |

|           |          |      |       |                                                                                                                                                                                                                           |       |       |       |       |       |       |       |       |
|-----------|----------|------|-------|---------------------------------------------------------------------------------------------------------------------------------------------------------------------------------------------------------------------------|-------|-------|-------|-------|-------|-------|-------|-------|
| 269784727 | Taf9b    | 293  | 32    |                                                                                                                                                                                                                           | 126.9 | 112.3 | 101.7 | 106.5 | 93.7  | 103.9 | 82.6  | 93.7  |
| 253683422 | Mon2     | 1715 | 189   |                                                                                                                                                                                                                           | 85.9  | 91    | 88.6  | 84.3  | 111.2 | 105.3 | 121.6 | 108.7 |
| 31981032  | Vps37a   | 397  | 44.4  | Endocytosis                                                                                                                                                                                                               | 94    | 105.3 | 87.2  | 89.9  | 97.7  | 100.2 | 123.4 | 116.7 |
| 31981053  | Ikbke    | 717  | 80.9  | Herpes simplex infection; NOD-like receptor signaling pathway; RIG-I-like receptor signaling pathway; Hepatitis B; Toll-like receptor signaling pathway; Influenza A; Hepatitis C; Cytosolic DNA-sensing pathway; Measles | 96.7  | 97.3  | 91.5  | 92    | 101.2 | 106.4 | 113.2 | 111.7 |
| 6680582   | Klf3     | 344  | 38.5  | Transcriptional misregulation in cancer                                                                                                                                                                                   | 120.2 | 130.2 | 113.5 | 103.6 | 70    | 71.3  | 78.3  | 70.2  |
| 6753258   | Capn7    | 813  | 92.5  |                                                                                                                                                                                                                           | 111.1 | 118.6 | 92.2  | 100.3 | 97.1  | 102.7 | 98.3  | 90.4  |
| 313569872 | Apoo     | 212  | 24.1  |                                                                                                                                                                                                                           | 108.1 | 116.3 | 91.2  | 86.9  | 116.1 | 121.8 | 112.4 | 108.7 |
| 124244060 | Ahdc1    | 1594 | 168   |                                                                                                                                                                                                                           |       |       |       |       |       |       |       |       |
| 6680331   | Hus1     | 281  | 31.8  |                                                                                                                                                                                                                           | 110.2 |       | 106.9 |       | 113.8 |       | 92    |       |
| 86198305  | Casp1    | 402  | 45.6  | Amyotrophic lateral sclerosis (ALS); NOD-like receptor signaling pathway; Pertussis; Salmonella infection; Legionellosis; Influenza A; Cytosolic DNA-sensing                                                              | 116.2 | 123.3 | 116.2 | 116.7 | 97    | 89.5  | 106.3 | 118.8 |
| 46592786  | Bcl2l11  | 196  | 22.1  | FoxO signaling pathway; MicroRNAs in cancer; Apoptosis - multiple species; Non-alcoholic fatty liver disease (NAFLD); PI3K-Akt signaling pathway; EGFR tyrosine kinase inhibitor resistance; Apoptosis                    |       | 104.4 |       | 90.1  |       | 109.6 |       | 104.9 |
| 30017373  | Lsg1     | 644  | 73.1  | Ribosome biogenesis in eukaryotes                                                                                                                                                                                         | 93.8  | 110.4 | 78.2  | 83.3  | 124.5 | 110   | 101.4 | 77.5  |
| 28076965  | Pvr      | 408  | 44.6  | Cell adhesion molecules (CAMs)                                                                                                                                                                                            |       | 94.2  |       | 81.6  |       | 116   |       | 113.2 |
| 76677920  | Mblac2   | 279  | 31.2  |                                                                                                                                                                                                                           |       |       |       |       |       |       |       |       |
| 21313588  | Sgta     | 315  | 34.3  |                                                                                                                                                                                                                           |       | 88.8  |       | 86.6  |       | 117.9 |       | 128.4 |
| 169234810 | Zfp292   | 2698 | 300.9 |                                                                                                                                                                                                                           | 98.5  |       | 84.1  |       | 110.2 |       | 106.4 |       |
| 47059139  | Ypel5    | 121  | 13.8  |                                                                                                                                                                                                                           | 113.1 | 94.8  | 93.2  | 89.6  | 88    | 88.1  | 121.1 | 125.9 |
| 45597453  | Slc27a4  | 643  | 72.3  | PPAR signaling pathway; Fat digestion and absorption; Insulin resistance                                                                                                                                                  | 118.6 | 124.8 | 110.8 | 107.6 | 106.4 | 95.3  | 112.8 | 70.7  |
| 71534295  | Man1b1   | 658  | 75.1  | Metabolic pathways; N-Glycan biosynthesis; Protein processing in endoplasmic reticulum                                                                                                                                    | 106.9 |       | 86.8  |       | 154.4 |       | 103.5 |       |
| 91598596  | Snx18    | 615  | 67.7  |                                                                                                                                                                                                                           | 106.3 | 126.2 | 97.5  | 107.4 | 90.1  | 89.6  | 94.9  | 79.4  |
| 31542089  | Mapkapk3 | 384  | 43.3  | MAPK signaling pathway; VEGF signaling pathway                                                                                                                                                                            | 102.6 | 116.4 | 81.8  | 91.9  | 144.5 | 97.8  | 100.8 | 95.9  |
| 21313470  | Alkbh7   | 221  | 25    |                                                                                                                                                                                                                           | 99.5  |       | 85.8  |       | 113.2 |       | 107.5 |       |
| 86355514  | Polr2k   | 99   | 11.7  |                                                                                                                                                                                                                           | 108.1 | 102.7 | 105.1 | 108.8 | 111.2 | 132.2 | 104.5 | 88.5  |
| 60687518  | Txnip    | 397  | 44.3  | NOD-like receptor signaling pathway                                                                                                                                                                                       | 89.8  | 88.2  | 75.6  | 75.5  | 112.5 | 114.4 | 112.6 | 114.2 |
| 396578140 | Setd1b   | 1985 | 215.2 | Lysine degradation                                                                                                                                                                                                        | 96.9  |       | 99.2  |       | 89.7  |       | 91.4  |       |
| 240120054 | Akr7a5   | 367  | 40.6  | Metabolism of xenobiotics by cytochrome P450                                                                                                                                                                              | 106.2 | 112.8 | 113.2 | 114.3 | 98.6  | 89.5  | 72.2  | 87    |
| 357527412 | Pqbp1    | 263  | 30.6  | Spliceosome                                                                                                                                                                                                               | 115   | 117.3 | 108.3 | 100.3 | 92.9  | 96.4  | 110.3 | 110.4 |
| 37537529  | Xpo6     | 1124 | 128.5 |                                                                                                                                                                                                                           |       | 124.2 |       | 93.3  |       | 137.9 |       | 103.9 |
| 153791422 | Tatdn2   | 722  | 80.7  |                                                                                                                                                                                                                           | 101.9 | 96.2  | 93.8  | 100.3 | 99.3  | 112.1 | 115.9 | 104.3 |
| 30520119  | Rnf214   | 668  | 73.6  |                                                                                                                                                                                                                           | 94.3  |       | 98.2  |       | 122.6 |       | 122.8 |       |
| 161353508 | Cbx4     | 551  | 60.5  |                                                                                                                                                                                                                           | 115.8 | 71.3  | 81.3  | 139   | 92.3  | 100.3 | 108.3 | 95.4  |

|           |                                                     |     |      |                                                                                                                                                                                                                                                                 |       |       |       |       |       |       |       |       |
|-----------|-----------------------------------------------------|-----|------|-----------------------------------------------------------------------------------------------------------------------------------------------------------------------------------------------------------------------------------------------------------------|-------|-------|-------|-------|-------|-------|-------|-------|
| 6679765   | Fdx1                                                | 188 | 20.1 |                                                                                                                                                                                                                                                                 | 121.5 |       | 66.8  |       | 113.9 |       | 92.2  |       |
| 145207988 | Tle3                                                | 782 | 84.5 |                                                                                                                                                                                                                                                                 | 109.1 | 96.6  | 89.7  | 93.3  | 104.4 | 102.1 | 95.4  | 98.4  |
| 172088095 | Ssu72                                               | 194 | 22.5 | mRNA surveillance pathway                                                                                                                                                                                                                                       | 91.8  | 97.3  | 101.1 | 88.9  | 95.5  | 96.1  | 104.4 | 113.4 |
| 188035858 | Rcn3                                                | 328 | 38   |                                                                                                                                                                                                                                                                 | 114.4 | 108.7 | 104.7 | 102   | 99.5  | 92.5  | 78.7  | 84.7  |
| 165377226 | Slc2a1                                              | 492 | 53.9 | Insulin resistance; HTLV-1 infection; Thyroid hormone signaling pathway; HIF-1 signaling pathway; Pathways in cancer; Bile secretion; Adipocytokine signaling pathway; Renal cell carcinoma; Insulin secretion; Central carbon metabolism in cancer; Glucagon s | 68.1  | 68.9  | 74.7  | 74.2  | 148.7 | 143.9 | 93    | 109.1 |
| 28201989  | Fbxo28                                              | 368 | 41   |                                                                                                                                                                                                                                                                 | 101   | 104.2 | 90.2  | 92.4  | 98.9  | 102.8 | 118.9 | 109.8 |
| 30424613  | Ccbl2;<br>Kvat3                                     | 420 | 47.3 |                                                                                                                                                                                                                                                                 | 90.9  |       | 96.6  |       | 143.5 |       | 101.5 |       |
| 52426750  | Cr11                                                | 440 | 49   |                                                                                                                                                                                                                                                                 | 91.7  |       | 106.9 |       | 107.8 |       | 73.3  |       |
| 262263310 | Mrpl22                                              | 206 | 23.8 | Ribosome                                                                                                                                                                                                                                                        | 102.8 | 102.2 | 94.9  | 93.4  | 125.7 | 106.2 | 112.8 | 105.4 |
| 407261032 | Cox7c;<br>Gm12338;<br>LOC100048613;<br>LOC102642884 | 63  | 7.3  | Metabolic pathways; Huntington's disease; Non-alcoholic fatty liver disease (NAFLD); Oxidative phosphorylation; Parkinson's disease; Alzheimer's disease; Cardiac muscle contraction                                                                            | 100.4 | 95    | 108.1 | 108.3 | 95.5  | 98.3  | 89.3  | 89.6  |
| 21703764  | Lactb2                                              | 288 | 32.7 |                                                                                                                                                                                                                                                                 | 102.8 | 108.7 | 104.7 | 96.2  | 102.2 | 109.3 | 100.4 | 101.7 |
| 6754948   | Orc5                                                | 435 | 50.2 | Cell cycle                                                                                                                                                                                                                                                      | 99.8  | 100.7 | 90.7  | 102.2 | 119.4 | 105.2 | 102.6 | 116.1 |
| 407262850 | Tma7-ps;<br>Tma7                                    | 64  | 7.1  |                                                                                                                                                                                                                                                                 | 136.5 | 139.5 | 142.7 | 146.3 | 56.7  | 55.1  | 73    | 68.9  |
| 254028195 | Srr                                                 | 339 | 36.3 | metabolic pathways, Glycine, serine and threonine metabolism                                                                                                                                                                                                    |       | 114.8 |       | 116.7 |       | 81    |       | 88.6  |
| 149271249 | Gm2036                                              | 65  | 7.4  |                                                                                                                                                                                                                                                                 |       |       |       |       |       |       |       |       |
| 31982133  | Amdhd2                                              | 409 | 43.5 | Amino sugar and nucleotide sugar metabolism                                                                                                                                                                                                                     | 112.5 | 118.8 | 104.3 | 107.7 | 93.3  | 90.8  | 97.4  | 88.9  |
| 299473737 | Aamp                                                | 436 | 46.9 |                                                                                                                                                                                                                                                                 | 83.4  | 92.8  | 81.5  | 77.9  | 120.2 | 119.9 | 122.8 | 126.2 |
| 133892547 | Bcl2                                                | 236 | 26.4 | AGE-RAGE signaling pathway in diabetic complications; Cholinergic synapse; Platinum drug resistance; MicroRNAs in cancer; Amyotrophic lateral sclerosis (ALS); Focal adhesion; NOD-like receptor signaling pathway; Jak-STAT signaling pathway; Toxoplasmosis   | 102.3 | 107   | 103.8 | 101.6 | 91.4  | 95.9  | 93.1  | 95.2  |
| 121247453 | Nr3c1                                               | 792 | 87.1 | Neuroactive ligand-receptor interaction                                                                                                                                                                                                                         | 111.5 | 105.5 | 98.7  | 112.9 | 94.5  | 87    | 86.5  | 95.2  |
| 6678840   | Mcpt8                                               | 247 | 27.1 |                                                                                                                                                                                                                                                                 | 136.9 |       | 99.1  |       | 78.5  |       | 90.5  |       |
| 13385658  | Mrpl10                                              | 262 | 29.4 | Ribosome                                                                                                                                                                                                                                                        | 110.3 | 104.2 | 100   | 114.6 | 106.4 | 88.3  | 120.8 | 118.3 |
| 166999987 | Rps6kb1                                             | 525 | 59.1 | ErbB signaling pathway; Acute myeloid leukemia; mTOR signaling pathway; Insulin signaling pathway; Breast cancer; Insulin resistance; Longevity regulating pathway; Proteoglycans in cancer; Fc gamma R-mediated phagocytosis; TGF-beta signaling pathway; HIF- |       | 112.3 |       | 94.4  |       | 89.9  |       | 88.8  |
| 29244210  | Impad1                                              | 356 | 38.6 | Metabolic pathways; Sulfur metabolism; Inositol phosphate metabolism; Phosphatidylinositol signaling system                                                                                                                                                     |       | 106.5 |       | 76    |       | 115.2 |       | 122.5 |

|           |                        |     |       |                                                                                                                                                                                                       |       |       |       |       |       |       |       |       |
|-----------|------------------------|-----|-------|-------------------------------------------------------------------------------------------------------------------------------------------------------------------------------------------------------|-------|-------|-------|-------|-------|-------|-------|-------|
| 9790229   | Sirt1                  | 737 | 80.3  | FoxO signaling pathway; MicroRNAs in cancer; Amphetamine addiction; Longevity regulating pathway; AMPK signaling pathway; Glucagon signaling pathway; Longevity regulating pathway - multiple species | 107.6 | 115.2 | 97.8  | 96.7  | 106.6 | 100.1 | 119.2 | 103.3 |
| 21312914  | Gpr89                  | 455 | 52.7  |                                                                                                                                                                                                       |       | 88.8  |       | 87.7  |       | 105.5 |       | 118.1 |
| 6755973   | Lin7c                  | 197 | 21.8  |                                                                                                                                                                                                       | 87.2  | 87.2  | 84.3  | 79.5  | 110.8 | 107.6 | 118.9 | 119.8 |
| 229577420 | Hopx                   | 73  | 8.3   |                                                                                                                                                                                                       | 148.8 | 140.3 | 136.3 | 137.4 | 91.2  | 87    | 70.7  | 73.7  |
| 31541824  | Eif1ax                 | 144 | 16.5  | RNA transport                                                                                                                                                                                         | 92.6  |       | 100.7 |       | 101.8 |       | 115.6 |       |
| 194328695 | Plscr1                 | 328 | 35.9  |                                                                                                                                                                                                       | 52.9  |       | 54.7  |       | 161.8 |       | 174.6 |       |
| 13385552  | Rpl39                  | 51  | 6.4   | Ribosome                                                                                                                                                                                              | 97.4  | 115.2 | 96.2  | 111.1 | 96.9  | 79.5  | 101.3 | 83.5  |
| 27754007  | Ndufab1                | 156 | 17.4  | Metabolic pathways; Huntington's disease; Non-alcoholic fatty liver disease (NAFLD); Oxidative phosphorylation; Parkinson's disease; Alzheimer's disease                                              | 106.4 | 108.3 | 99.4  | 96.4  | 91.4  | 93    | 120.2 | 114.6 |
| 116268121 | Ccr7                   | 378 | 42.8  | Chemokine signaling pathway; Transcriptional misregulation in cancer; Cytokine-cytokine receptor                                                                                                      | 93    | 90.5  | 87.5  | 80.6  | 121.3 | 115.8 | 124.1 | 129.9 |
| 227496381 | Tasp1                  | 420 | 44.3  |                                                                                                                                                                                                       | 100.3 | 112.1 | 106.7 | 110.5 | 103   | 99.9  | 99.4  | 99.4  |
| 28076889  | Yipf4                  | 246 | 27.3  |                                                                                                                                                                                                       | 87.2  | 93.5  | 85.1  | 78    | 115.4 | 121   | 114.9 | 114.4 |
| 359385706 | Racgap1                | 628 | 70.1  |                                                                                                                                                                                                       | 40.2  |       | 41.6  |       | 170.7 |       | 187   |       |
| 31088908  | Vps37c                 | 352 | 38.4  | Endocytosis                                                                                                                                                                                           | 105.1 | 94.9  | 103   | 87.8  | 106.8 | 109.8 | 101.4 | 117.4 |
| 114205416 | Mllt3                  | 569 | 63.3  | Transcriptional misregulation in cancer                                                                                                                                                               | 84.8  | 106.4 | 95.5  | 104.9 | 112   | 98.5  | 120.9 | 96.7  |
| 124377998 | Fuom                   | 153 | 16.8  |                                                                                                                                                                                                       | 122.3 | 115.8 | 104.7 | 103   | 81.1  | 87.8  | 85    | 90.9  |
| 13385196  | Emc2                   | 297 | 34.9  |                                                                                                                                                                                                       | 96.3  | 91.2  | 84.1  | 91.3  | 123.4 | 121.5 | 119.8 | 116   |
| 148540184 | Srfbp1                 | 441 | 48.7  |                                                                                                                                                                                                       |       | 121.4 |       | 99.6  |       | 95    |       | 114.8 |
| 6680886   | Cd3e                   | 189 | 21.4  | Chagas disease (American trypanosomiasis); T cell receptor signaling pathway; Primary immunodeficiency; HTLV-I infection; Hematopoietic cell lineage; Th1 and Th2 cell differentiation; Measles       | 108.9 | 130.4 | 152.9 | 106.1 | 67.4  | 75.7  | 69.3  | 105.4 |
| 22094997  | Haus7;<br>LOC102642054 | 364 | 40.6  |                                                                                                                                                                                                       | 113.2 |       | 84.1  |       | 102.8 |       | 115.4 |       |
| 6678788   | Man1a                  | 655 | 73.2  | Metabolic pathways; N-Glycan biosynthesis; Protein processing in endoplasmic reticulum                                                                                                                | 105.5 | 103.3 | 96.9  | 98.5  | 114   | 118.5 | 81.9  | 76.9  |
| 110835702 | Cc2d1a                 | 943 | 103.6 |                                                                                                                                                                                                       | 105.2 | 108.1 | 99.6  | 102.7 | 96.8  | 104.4 | 106.4 | 101.6 |
| 157057192 | Lin9                   | 542 | 61.7  |                                                                                                                                                                                                       |       | 91.8  |       | 93.1  |       | 102.8 |       | 95.3  |
| 21312380  | Gemin7                 | 129 | 14.2  | RNA transport                                                                                                                                                                                         |       | 102.4 |       | 88.9  |       | 95.6  |       | 112.1 |
| 25286717  | Txndc9                 | 226 | 26.2  |                                                                                                                                                                                                       | 106.9 | 98.5  | 90.7  | 80.3  | 125.6 | 127   | 55.3  | 85.7  |
| 6754102   | Gzma                   | 260 | 28.6  | Neuroactive ligand-receptor interaction                                                                                                                                                               | 177.2 | 159.9 | 146.2 | 144.7 | 68.8  | 65.3  | 73.5  | 66.9  |
| 15011843  | Sephs2                 | 452 | 47.8  | Metabolic pathways; Selenocompound metabolism                                                                                                                                                         | 96.8  | 96.3  | 187.1 | 169.5 | 86.4  | 85.9  | 81.6  | 81.7  |
| 27229064  | Agpat4                 | 378 | 43.8  | Phospholipase D signaling pathway; Metabolic pathways; Glycerophospholipid metabolism; Glycerolipid metabolism                                                                                        | 95.2  | 98.6  | 82.1  | 102.2 | 112   | 98.6  | 102.2 | 96    |
| 31560255  | Fam82b;<br>Rmdn1       | 305 | 35    |                                                                                                                                                                                                       | 106.6 | 109.7 | 99    | 102.5 | 96.1  | 93.3  | 92.6  | 95.4  |

|           |                   |      |       |                                                                                                                                                                                                                                                                 |       |       |       |       |       |       |       |       |
|-----------|-------------------|------|-------|-----------------------------------------------------------------------------------------------------------------------------------------------------------------------------------------------------------------------------------------------------------------|-------|-------|-------|-------|-------|-------|-------|-------|
| 227330580 | 4632428N<br>05Rik | 308  | 33.5  |                                                                                                                                                                                                                                                                 | 109.6 |       | 108.5 |       | 95.1  |       | 90.5  |       |
| 30794432  | Chmp2b            | 213  | 23.9  | Endocytosis                                                                                                                                                                                                                                                     | 106.6 | 94.1  | 93.8  | 85.1  | 91.6  | 76.2  | 100.4 | 119.6 |
| 27734072  | Rbmx2             | 326  | 37.5  |                                                                                                                                                                                                                                                                 | 103.7 | 93.8  | 100.2 | 103.1 | 99.4  | 99.8  | 110.5 | 115.3 |
| 9789931   | Diap3;<br>Diaph3  | 1171 | 133.6 | Regulation of actin cytoskeleton                                                                                                                                                                                                                                | 90.7  |       | 84.3  |       | 124.2 |       | 96    |       |
| 31980960  | Ube2j1            | 318  | 35    | Ubiquitin mediated proteolysis; Parkinson's disease; Protein processing in endoplasmic reticulum                                                                                                                                                                | 83.8  | 83.5  | 76.4  | 84.1  | 129.1 | 125.9 | 109.9 | 140.5 |
| 270341361 | Shoc2             | 582  | 64.9  | Ras signaling pathway                                                                                                                                                                                                                                           | 99.3  |       | 104.5 |       | 99.3  |       | 96.6  |       |
| 329299048 | Dcun1d1           | 259  | 30.1  |                                                                                                                                                                                                                                                                 | 105.7 | 117.8 | 103.2 | 107.6 | 89.4  | 89    | 106.9 | 98.6  |
| 31980629  | Vamp8             | 101  | 11.4  | Platelet activation; SNARE interactions in vesicular transport                                                                                                                                                                                                  | 102.9 | 99.1  | 101.8 | 101.9 | 93    | 92.1  | 99.5  | 98.7  |
| 27369557  | Fastkd2           | 689  | 78.9  |                                                                                                                                                                                                                                                                 | 100.6 | 93.4  | 84.3  | 93.4  | 115.8 | 112.4 | 107.7 | 106.1 |
| 188219757 | Aldh7a1           | 539  | 58.8  | Histidine metabolism; Lysine biosynthesis; Pyruvate metabolism; Arginine and proline metabolism; Tryptophan metabolism; Valine, leucine and isoleucine degradation; Metabolic pathways; Lysine degradation; Fatty acid degradation; Biosynthesis of amino acids | 103   | 93.8  | 102.1 | 99.3  | 95.6  | 113.7 | 94.5  | 99.4  |
| 9625018   | Gde1              | 331  | 37.6  |                                                                                                                                                                                                                                                                 | 84.3  | 85.9  | 84.6  | 81.4  | 111.9 | 116.9 | 120.9 | 116.6 |
| 50054188  | Mum1              | 682  | 76    |                                                                                                                                                                                                                                                                 | 117.9 | 116.5 | 96.7  | 110.2 | 98.4  | 87.8  | 96.3  | 96.9  |
| 13384766  | Tmem14c           | 114  | 11.6  |                                                                                                                                                                                                                                                                 | 95.6  | 148.6 | 124.5 | 133.3 | 123.2 | 118.1 | 72.5  | 99.4  |
| 13385798  | Dctn4             | 460  | 52.2  | Huntington's disease; Vasopressin-regulated water reabsorption                                                                                                                                                                                                  | 94.4  | 102.3 | 99.6  | 99.6  | 100.4 | 97.6  | 111.9 | 110.7 |
| 101943608 | Ung               | 306  | 33.9  | Primary immunodeficiency; Base excision repair                                                                                                                                                                                                                  | 96.9  | 92.2  | 86.4  | 83.2  | 109.4 | 118.1 | 108.9 | 119.4 |
| 31044487  | B230219D<br>22Rik | 188  | 20.1  |                                                                                                                                                                                                                                                                 | 109.5 | 115.9 | 103.6 | 100.3 | 89.2  | 87.1  | 98    | 95.5  |
| 12963667  | Npc2              | 149  | 16.4  | Lysosome                                                                                                                                                                                                                                                        | 87.1  | 89.7  | 114.9 | 110.8 | 97.5  | 101.6 | 99.7  | 108.8 |
| 12963599  | Ccnh              | 323  | 37.5  | Basal transcription factors; Nucleotide excision repair; Cell cycle                                                                                                                                                                                             | 111.2 |       | 78.5  |       | 152.9 |       | 68.7  |       |
| 139947660 | 9130011E<br>15Rik | 689  | 78.6  |                                                                                                                                                                                                                                                                 | 111.7 |       | 113.8 |       | 89.9  |       | 100.1 |       |
| 83816907  | Dnajb6            | 365  | 39.8  |                                                                                                                                                                                                                                                                 | 96.8  | 91.5  | 89.4  | 92.7  | 109.2 | 110.1 | 113.9 | 114.6 |
| 160333840 | Srp19             | 144  | 16.1  | Protein export                                                                                                                                                                                                                                                  |       | 115.8 |       | 114.7 |       | 111.1 |       | 94.7  |
| 52693935  | Txndc15           | 344  | 38.1  |                                                                                                                                                                                                                                                                 | 103.9 | 104.1 | 79.2  | 107.5 | 113.9 | 109.4 | 121.8 | 99.3  |
| 28076939  | Ppp1r35           | 260  | 28.3  |                                                                                                                                                                                                                                                                 | 93.3  | 85.1  | 93.8  | 89.6  | 93.5  | 114.6 | 116.1 | 96.6  |
| 19882231  | Med30             | 178  | 20.3  | Thyroid hormone signaling pathway                                                                                                                                                                                                                               | 105.4 | 96.8  | 89.8  | 84.2  | 105.6 | 102.2 | 112.8 | 115.5 |
| 83627707  | Atp6v0a2          | 856  | 98.1  | Rheumatoid arthritis; Metabolic pathways; Tuberculosis; Lysosome; Phagosome; Oxidative phosphorylation; Synaptic vesicle cycle; Collecting duct acid secretion                                                                                                  |       | 104.8 |       | 94.8  |       | 103.3 |       | 101   |
| 294774564 | Gng12             | 72   | 8     | Morphine addiction; Cholinergic synapse; Retrograde endocannabinoid signaling; Regulation of actin cytoskeleton; MAPK signaling pathway; Dopaminergic synapse; Ras signaling pathway; GABAergic synapse; Chemokine signaling pathway; Glutamatergic synapse; Pa |       | 108   |       | 72.7  |       | 111.2 |       | 94.5  |

|           |                      |      |       |                                                                                                                                                                                                                                                                 |       |       |       |       |       |       |       |       |
|-----------|----------------------|------|-------|-----------------------------------------------------------------------------------------------------------------------------------------------------------------------------------------------------------------------------------------------------------------|-------|-------|-------|-------|-------|-------|-------|-------|
| 117168287 | Dvl3                 | 716  | 78.1  | mTOR signaling pathway; Wnt signaling pathway; Basal cell carcinoma; Hippo signaling pathway; Breast cancer; Signaling pathways regulating pluripotency of stem cells; Melanogenesis; HTLV-I infection; Notch signaling pathway; Pathways in cancer             | 111.7 |       | 85.3  |       | 121.2 |       | 98.7  |       |
| 27370170  | L3mbtl3              | 883  | 99.1  |                                                                                                                                                                                                                                                                 | 112.7 | 99.1  | 98.7  | 112.3 | 87.9  | 89    | 89.9  | 91.7  |
| 160333312 | Sik3                 | 1369 | 150.6 |                                                                                                                                                                                                                                                                 | 87.3  | 86    | 84    | 77.6  | 118.6 | 112.4 | 124.1 | 132.4 |
| 25140989  | Elof1                | 83   | 9.5   |                                                                                                                                                                                                                                                                 | 126.9 |       | 135.4 |       | 59.9  |       | 83.5  |       |
| 39841065  | Tsen2                | 460  | 52.2  |                                                                                                                                                                                                                                                                 | 131.8 |       | 102.5 |       | 102.6 |       | 87.9  |       |
| 23956270  | Fbxw11               | 563  | 64.4  |                                                                                                                                                                                                                                                                 |       |       |       |       |       |       |       |       |
| 20149754  | Ufsp2                | 461  | 52.5  |                                                                                                                                                                                                                                                                 | 95.6  | 101.6 | 90.4  | 90    | 119.3 | 117.2 | 113   | 103.1 |
| 226371698 | Exoc6b               | 810  | 94.1  |                                                                                                                                                                                                                                                                 | 113.8 |       | 97    |       | 106.2 |       | 98.8  |       |
| 165377197 | Eral1                | 437  | 48.2  |                                                                                                                                                                                                                                                                 | 110.7 |       | 91.3  |       | 107   |       | 106.8 |       |
| 34365779  | Pbx1                 | 430  | 46.6  | Transcriptional misregulation in cancer                                                                                                                                                                                                                         |       | 108.7 |       | 97.4  |       | 101.8 |       | 86.3  |
| 15805026  | Zfand6               | 223  | 24    |                                                                                                                                                                                                                                                                 | 102.9 | 107.2 | 99.4  | 91.7  | 88.7  | 90.6  | 130.7 | 120.9 |
| 170784829 | Glt25d1;<br>Colgalt1 | 617  | 71    | Lysine degradation; Other types of O-glycan biosynthesis                                                                                                                                                                                                        | 77.4  | 78.9  | 71.9  | 75.5  | 127.8 | 127.9 | 127.7 | 118.8 |
| 126518317 | C3                   | 1663 | 186.4 | Herpes simplex infection; Chagas disease (American trypanosomiasis); Staphylococcus aureus infection; Tuberculosis; Phagosome; Complement and coagulation cascades; Pertussis; Legionellosis; Systemic lupus erythematosus; Leishmaniasis; Viral carcinogenesis | 221.3 |       | 182.7 |       | 95.5  |       | 57.8  |       |
| 6678031   | Smpd2                | 419  | 47.4  | Metabolic pathways; Sphingolipid signaling pathway; Sphingolipid metabolism                                                                                                                                                                                     | 124.4 |       | 92.2  |       | 93.1  |       | 98    |       |
| 295054183 | Odf2                 | 826  | 95.5  |                                                                                                                                                                                                                                                                 | 110.9 | 104.7 | 135   | 133.8 | 87.3  | 97.4  | 77.4  | 80.9  |
| 46909575  | Gfer                 | 198  | 22.9  |                                                                                                                                                                                                                                                                 | 134.6 |       | 112.6 |       | 94    |       | 99.7  |       |
| 6679447   | Ppp3cc               | 513  | 58.7  | Oxytocin signaling pathway; Wnt signaling pathway; T cell receptor signaling pathway; MAPK signaling pathway; Dopaminergic synapse; Amyotrophic lateral sclerosis (ALS); VEGF signaling pathway; Long-term potentiation; Amphetamine addiction; Tuberculosis; A | 119.6 | 110.1 | 110.6 | 110.9 | 83.9  | 93.8  | 87.1  | 90.7  |
| 161702979 | Fxyd5                | 178  | 19.4  |                                                                                                                                                                                                                                                                 | 100.5 | 103.7 | 104.1 | 97    | 95.5  | 97    | 107.7 | 97.5  |
| 239985599 | Glmn                 | 596  | 67.7  |                                                                                                                                                                                                                                                                 | 87.9  | 81.3  | 87.5  | 86.3  | 114.1 | 118.3 | 120.2 | 126.9 |
| 117647247 | Zcche9               | 271  | 30.5  |                                                                                                                                                                                                                                                                 | 110.9 |       | 103   |       | 96.1  |       | 103.2 |       |
| 257900506 | Dcp1b                | 578  | 62.7  | RNA degradation                                                                                                                                                                                                                                                 |       |       |       |       |       |       |       |       |
| 41282044  | Sypl                 | 243  | 26.7  |                                                                                                                                                                                                                                                                 | 106.4 | 105   | 106.7 | 97.3  | 93.1  | 97.2  | 90.6  | 98.9  |
| 22267446  | Exosc1               | 195  | 21.4  | RNA degradation                                                                                                                                                                                                                                                 | 89.3  | 118.6 | 98.3  | 121   | 86.1  | 79    | 109.6 | 96.3  |
| 166197692 | Tespa1               | 458  | 51.7  |                                                                                                                                                                                                                                                                 | 110   |       | 108.7 |       | 98.4  |       | 90.2  |       |
| 144922690 | Klf16                | 251  | 25.6  |                                                                                                                                                                                                                                                                 | 98.9  | 94.5  | 115.4 | 129.3 | 113.7 | 103   | 102.4 | 106.1 |
| 16905135  | 1110038F<br>14Rik    | 160  | 18.1  |                                                                                                                                                                                                                                                                 | 92.3  | 91.3  | 89    | 92.5  | 110.8 | 107.4 | 120.1 | 114.7 |
| 124487163 | Kif13b               | 1843 | 204.4 |                                                                                                                                                                                                                                                                 | 98.3  |       | 95.9  |       | 101   |       | 109.2 |       |



|           |                    |      |       |                                                                                                                                           |       |       |       |       |       |       |       |       |
|-----------|--------------------|------|-------|-------------------------------------------------------------------------------------------------------------------------------------------|-------|-------|-------|-------|-------|-------|-------|-------|
| 158517935 | Orc1               | 840  | 95    | Cell cycle                                                                                                                                | 75.4  | 66.5  | 74.5  | 81.7  | 142.1 | 147.8 | 133.6 | 126   |
| 124487049 | Ddx60              | 1711 | 197.5 |                                                                                                                                           | 122.7 |       | 99    |       | 72    |       | 80.6  |       |
| 21313650  | Snx20              | 313  | 36    |                                                                                                                                           | 112.9 | 110.8 | 99.3  | 94.8  | 111.5 | 98.7  | 94    | 102.2 |
| 84875530  | Tom1l2             | 507  | 55.6  |                                                                                                                                           | 99.3  |       | 106.7 |       | 92.1  |       | 117.2 |       |
| 145301561 | Car1               | 261  | 28.3  | Nitrogen metabolism                                                                                                                       |       |       |       |       |       |       |       |       |
| 124486729 | Fra10ac1           | 315  | 37.2  |                                                                                                                                           | 98    |       | 100.9 |       | 93.8  |       | 109.4 |       |
| 124358953 | Ell                | 602  | 67.1  |                                                                                                                                           | 90.1  | 92.3  | 91.3  | 96.5  | 120.3 | 108.7 | 109.1 | 113.5 |
| 21450059  | Ankrd54            | 299  | 32.5  |                                                                                                                                           |       | 129.9 |       | 95    |       | 91.3  |       | 97.2  |
| 21313340  | Tmco4              | 631  | 67.9  |                                                                                                                                           | 108.2 | 99.9  | 101.3 | 90.4  | 101.9 | 101.8 | 104.5 | 101   |
| 407261319 | Sumf2              | 349  | 39.4  |                                                                                                                                           | 105.5 | 109.8 | 91.7  | 93.9  | 116.5 | 121.9 | 114.7 | 105.7 |
| 31981264  | Polr3e             | 710  | 79.8  | RNA polymerase; Epstein-Barr virus infection; Purine metabolism; Pyrimidine metabolism; Cytosolic DNA-sensing pathway                     | 107.7 | 101.6 | 88.9  | 91.6  | 111.1 | 102.7 | 104.4 | 111.2 |
| 295293088 | Clcc1              | 544  | 61.2  |                                                                                                                                           | 103.6 | 111   | 105.3 | 105.4 | 134.5 | 122.8 | 99    | 98.7  |
| 247300747 | A430005L14Rik      | 230  | 24.8  |                                                                                                                                           | 102.9 | 129   | 97    | 99.9  | 97.1  | 88.1  | 101   | 106.9 |
| 22122471  | Tep11l2            | 517  | 57.9  |                                                                                                                                           | 97.6  | 106.9 | 97.8  | 103.3 | 89.9  | 97    | 95.2  | 97.8  |
| 11967945  | Tmub1              | 245  | 26.3  |                                                                                                                                           | 101.7 | 103.9 | 108.8 | 105.9 | 94.8  | 92.6  | 94.7  | 84    |
| 33859530  | Cryz               | 331  | 35.2  |                                                                                                                                           | 105.4 | 127.3 | 99.2  | 103.3 | 104.1 | 81.2  | 105.6 | 93.1  |
| 110625780 | Kdsr               | 332  | 35.9  | Metabolic pathways; Sphingolipid metabolism                                                                                               | 82.1  | 95.5  | 89.6  | 101   | 106.6 | 101.6 | 106.3 | 102.3 |
| 24962647  | Peo1; Twnk         | 685  | 76.9  |                                                                                                                                           | 107.3 | 76    | 92.8  | 74.7  | 103.9 | 131.3 | 105.9 | 109.3 |
| 38372897  | Ssbp3              | 388  | 40.4  |                                                                                                                                           | 102.5 | 108.2 | 98.5  | 100.6 | 105.5 | 100.3 | 90.1  | 92.8  |
| 37694072  | Arid4b             | 1314 | 147.6 |                                                                                                                                           | 134.4 |       | 90.4  |       | 85.1  |       | 112.3 |       |
| 46195739  | Polr3b             | 1133 | 127.6 | RNA polymerase; Epstein-Barr virus infection; Metabolic pathways; Purine metabolism; Pyrimidine metabolism; Cytosolic DNA-sensing pathway | 78.1  | 127.5 | 80    | 96.6  | 120.3 | 87.1  | 113.6 | 81.7  |
| 171184398 | Galns              | 520  | 57.6  | Metabolic pathways; Lysosome; Glycosaminoglycan degradation                                                                               |       | 123.2 |       | 107.9 |       | 98.7  |       | 80.7  |
| 169808411 | Rcbtb1             | 531  | 58.3  |                                                                                                                                           | 104.2 | 99.8  | 98.3  | 98.2  | 100.4 | 101.9 | 110.8 | 103.2 |
| 146229342 | Myl10              | 147  | 16.9  |                                                                                                                                           | 85.2  | 71.6  | 112.6 | 126.1 | 110   | 115.5 | 54.2  | 51.3  |
| 21313140  | Tax1bp3            | 124  | 13.7  |                                                                                                                                           | 104.7 |       | 105.5 |       | 94.2  |       | 100.7 |       |
| 46309457  | Vkorc1l1           | 176  | 19.8  | Ubiquinone and other terpenoid-quinone biosynthesis                                                                                       | 100.7 | 98.1  | 99.5  | 96.6  | 113.5 | 108.8 | 100.6 | 102.5 |
| 407260982 | Swi5; LOC101056690 | 121  | 13.8  |                                                                                                                                           | 76.3  | 90.8  | 82.4  | 83.2  | 129.9 | 106.6 | 133.3 | 134.6 |
| 295054274 | Golph3l            | 343  | 39.5  |                                                                                                                                           | 98.9  | 95.9  | 109.4 | 110.9 | 105.6 | 109   | 84.3  | 83.7  |
| 257196264 | Sil1               | 465  | 52.4  | Protein processing in endoplasmic reticulum                                                                                               | 101.6 |       | 79.2  |       | 130.4 |       | 123.1 |       |
| 359806915 | Ncor2              | 2468 | 269.1 |                                                                                                                                           | 165.5 | 99.2  | 94.1  | 93.9  | 92.5  | 100.6 | 97.8  | 91.5  |
| 6680117   | Gss                | 474  | 52.2  | Glutathione metabolism; Metabolic pathways; Cysteine and methionine metabolism                                                            | 102.7 | 105.8 | 87.7  | 90.1  | 96.6  | 99.6  | 102.5 | 94.9  |

|           |              |      |       |                                                                                                                                                                                                                                                                 |       |       |       |       |       |       |       |       |
|-----------|--------------|------|-------|-----------------------------------------------------------------------------------------------------------------------------------------------------------------------------------------------------------------------------------------------------------------|-------|-------|-------|-------|-------|-------|-------|-------|
| 120300971 | Erc1         | 1120 | 128.3 |                                                                                                                                                                                                                                                                 | 100.1 | 108.7 | 97.7  | 95    | 105.8 | 107.8 | 124.4 | 123.1 |
| 255708407 | Smad5        | 465  | 52.1  | Signaling pathways regulating pluripotency of stem cells; TGF-beta signaling pathway                                                                                                                                                                            | 95    |       | 102.3 |       | 136.8 |       | 104.3 |       |
| 326537279 | Jarid2       | 1234 | 137.4 | Signaling pathways regulating pluripotency of stem cells                                                                                                                                                                                                        |       |       |       |       |       |       |       |       |
| 11140825  | Trappc4      | 219  | 24.4  |                                                                                                                                                                                                                                                                 | 98    | 91    | 102   | 93.3  | 102.7 | 129.4 | 70    | 103.4 |
| 23346499  | Thtpa        | 224  | 24.2  | Thiamine metabolism; Metabolic pathways                                                                                                                                                                                                                         | 125.2 | 122.5 | 110   | 101.1 | 100.7 | 104.9 | 104.8 | 108.1 |
| 21450205  | Wrap53       | 532  | 58.1  |                                                                                                                                                                                                                                                                 | 102.5 |       | 99.5  |       | 117.8 |       | 97.8  |       |
| 21313050  | Gemin6       | 166  | 18.7  | RNA transport                                                                                                                                                                                                                                                   | 65.3  | 102.1 | 94.3  | 93.9  | 130.5 | 103.3 | 126.7 | 142.5 |
| 27754105  | Ube2g1       | 170  | 19.5  | Ubiquitin mediated proteolysis; Parkinson's disease; Protein processing in endoplasmic reticulum                                                                                                                                                                |       |       |       |       |       |       |       |       |
| 70980537  | Nr2c2ap      | 140  | 15.8  |                                                                                                                                                                                                                                                                 | 108.8 | 106.6 | 92.5  | 92.6  | 100.8 | 99.2  | 89.8  | 93.9  |
| 254675168 | Timm23       | 209  | 21.9  |                                                                                                                                                                                                                                                                 | 93.3  | 96.4  | 95.1  | 92.3  | 127.4 | 120   | 111.6 | 112.8 |
| 11230806  | Trp53inp1    | 239  | 26.9  | HTLV-I infection                                                                                                                                                                                                                                                | 97.4  | 87    | 85.7  | 80.8  | 85.9  | 88.7  | 154.7 | 168.3 |
| 87159826  | Arhgap26     | 814  | 92    |                                                                                                                                                                                                                                                                 |       | 98.1  |       | 89.1  |       | 112.8 |       | 100.4 |
| 30520075  | Mapk1ip1l    | 242  | 23.9  |                                                                                                                                                                                                                                                                 | 121.2 | 125.3 | 110.8 | 106.4 | 76.2  | 97.1  | 92.2  | 83.1  |
| 269996037 | Morf4l2      | 288  | 32.2  |                                                                                                                                                                                                                                                                 | 90    | 90.4  | 83.6  | 84.7  | 119.6 | 116.8 | 130.3 | 127.3 |
| 171916090 | Gpbp1        | 493  | 55.6  |                                                                                                                                                                                                                                                                 | 96.8  |       | 102.5 |       | 102.9 |       | 105.2 |       |
| 124378035 | Tnrc6c       | 1900 | 198.1 |                                                                                                                                                                                                                                                                 |       |       |       |       |       |       |       |       |
| 162287089 | Kif4         | 1231 | 139.4 |                                                                                                                                                                                                                                                                 | 79.1  | 86    | 77.7  | 72.7  | 140.5 | 123.5 | 125.8 | 141.3 |
| 9055300   | Rp9          | 213  | 25.2  | Spliceosome                                                                                                                                                                                                                                                     | 109.9 | 114.4 | 108.6 | 111.3 | 95.9  | 92.9  | 99.2  | 103.4 |
| 256000773 | Pi4kb        | 801  | 89.9  |                                                                                                                                                                                                                                                                 | 108.1 | 105.3 | 101.8 | 93    | 99.3  | 100.7 | 105.1 | 102.2 |
| 13385826  | Polr2g       | 172  | 19.3  | RNA polymerase; Epstein-Barr virus infection; Metabolic pathways; Purine metabolism; Huntington's disease; Pyrimidine metabolism                                                                                                                                | 104.2 | 112   | 113.2 | 109.8 | 100.2 | 95.2  | 119.7 | 105.2 |
| 22267456  | Fars2        | 451  | 52.3  | Aminoacyl-tRNA biosynthesis                                                                                                                                                                                                                                     | 112.1 |       | 92.5  |       | 109.2 |       | 113   |       |
| 6678177   | Stx4a        | 298  | 34.1  | SNARE interactions in vesicular transport; Vasopressin-regulated water reabsorption                                                                                                                                                                             | 86.3  |       | 86.2  |       | 111.6 |       | 118.7 |       |
| 409191597 | Dnajc5       | 198  | 22.1  | Protein processing in endoplasmic reticulum                                                                                                                                                                                                                     | 118.2 | 180.9 | 93.8  | 103.4 | 100.9 | 90.1  | 110.3 | 92.9  |
| 31559995  | Crk          | 304  | 33.8  | ErbB signaling pathway; Regulation of actin cytoskeleton; MAPK signaling pathway; MicroRNAs in cancer; Focal adhesion; Insulin signaling pathway; Chemokine signaling pathway; Fc gamma R-mediated phagocytosis; Neurotrophin signaling pathway; Ran1 signaling | 103   | 128   | 98.8  | 95.1  | 107.5 | 158.6 | 100.8 | 80.3  |
| 164698472 | Pdzd8        | 1147 | 127.7 |                                                                                                                                                                                                                                                                 |       | 98.1  |       | 97.1  |       | 109.2 |       | 111   |
| 32441290  | Lnp; Lnpk    | 425  | 47.5  |                                                                                                                                                                                                                                                                 | 77.7  | 90.9  | 96.6  | 87.5  | 115.3 | 111.3 | 110.7 | 108.4 |
| 30725810  | Tnfrsf14     | 275  | 30.2  | Herpes simplex infection; Cytokine-cytokine receptor interaction                                                                                                                                                                                                | 108.1 | 92.2  | 95.8  | 86.4  | 91    | 109   | 113.6 | 118.7 |
| 166706907 | Fam160b1     | 764  | 86    |                                                                                                                                                                                                                                                                 | 105.4 | 114.1 | 122.6 | 118.3 | 92.5  | 95.3  | 103   | 85.9  |
| 407261282 | LOC101056154 | 244  | 25.8  |                                                                                                                                                                                                                                                                 | 117.3 |       | 98.8  |       | 79.8  |       | 103   |       |
| 6754046   | Gpaa1        | 621  | 67.9  | Glycosylphosphatidylinositol (GPI)-anchor biosynthesis; Metabolic pathways                                                                                                                                                                                      | 90.8  |       | 96.8  |       | 100.4 |       | 98.6  |       |

|           |                              |      |       |                                                                                                                                                          |       |       |       |       |       |       |       |       |
|-----------|------------------------------|------|-------|----------------------------------------------------------------------------------------------------------------------------------------------------------|-------|-------|-------|-------|-------|-------|-------|-------|
| 160333667 | Keap1                        | 624  | 69.5  | Ubiquitin mediated proteolysis                                                                                                                           |       |       |       |       |       |       |       |       |
| 13385682  | Poc5                         | 558  | 60.9  |                                                                                                                                                          | 105.8 |       | 98.1  |       | 101.6 |       | 88.1  |       |
| 170650667 | Plekhf1                      | 279  | 31.1  |                                                                                                                                                          | 103.9 | 110.4 | 104   | 98.3  | 97.1  | 93.3  | 91.7  | 88.9  |
| 41056261  | Arhgef18                     | 1021 | 114.3 |                                                                                                                                                          | 141.9 | 116.3 | 156.4 | 118.9 | 66.9  | 87.8  | 60.1  | 86.1  |
| 255683418 | Naaa                         | 362  | 40.1  |                                                                                                                                                          | 144.1 | 142.9 | 123.3 | 119.4 | 88.3  | 91.9  | 89    | 93    |
| 6677837   | S100a9                       | 113  | 13    |                                                                                                                                                          | 275.7 | 265.1 | 125.7 | 135   | 56.3  | 52.4  | 56.9  | 93.8  |
| 158634484 | Kcna3                        | 528  | 58.5  |                                                                                                                                                          | 91.9  |       | 79.6  |       | 163.4 |       | 110.9 |       |
| 47523977  | Krt72;<br>Krt72-ps           | 520  | 56.7  |                                                                                                                                                          | 88.8  | 62.9  | 84.3  | 86.6  | 87.7  | 83.4  | 116.6 | 97    |
| 67763824  | Hltf                         | 1003 | 113.2 |                                                                                                                                                          | 113.3 |       | 97.5  |       | 92    |       | 98.4  |       |
| 86990460  | Kif1b                        | 1770 | 198.8 |                                                                                                                                                          | 113   | 115.4 | 120.3 | 123.8 | 98.8  | 97.4  | 68.8  | 63    |
| 46877098  | Slc35c1                      | 363  | 39.9  |                                                                                                                                                          | 99.6  | 95.3  | 102.3 | 93.9  | 97.3  | 102.5 | 98.9  | 96.4  |
| 20070390  | Spg21                        | 308  | 34.9  | Endocytosis                                                                                                                                              | 97.9  | 86.6  | 86.6  | 98.1  | 111.4 | 113.1 | 112.4 | 95.1  |
| 7305271   | Mkln1                        | 735  | 84.8  |                                                                                                                                                          | 92.1  | 89.1  | 81.9  | 82.3  | 125.3 | 135.4 | 128.5 | 126.1 |
| 21313554  | Sec11c                       | 192  | 21.6  | Protein export                                                                                                                                           | 104.1 | 98.8  | 101.1 | 102.9 | 104.4 | 103.6 | 97.7  | 98.3  |
| 47059095  | Ath11;<br>Peghg              | 690  | 76.4  |                                                                                                                                                          | 93.1  |       | 91.9  |       | 108.2 |       | 101   |       |
| 226823279 | Per1                         | 1291 | 136.3 | Herpes simplex infection; Circadian rhythm; Circadian entrainment                                                                                        |       | 106.5 |       | 76    |       | 128.6 |       | 124.1 |
| 269784707 | Galnt7                       | 657  | 75.4  | Metabolic pathways; Mucin type O-glycan biosynthesis                                                                                                     | 103.1 |       | 100.4 |       | 107.3 |       | 86.3  |       |
| 149266669 | Gm3244;<br>Ndufb4;<br>Gm3873 | 129  | 15.1  | Metabolic pathways; Huntington's disease; Non-alcoholic fatty liver disease (NAFLD); Oxidative phosphorylation; Parkinson's disease; Alzheimer's disease | 103   | 107.4 | 94    | 97.6  | 99.1  | 91.7  | 90.4  | 85.8  |
| 39540506  | N6amt1                       | 214  | 23    |                                                                                                                                                          | 124.2 | 106.3 | 100.6 | 101.1 | 86.1  | 94    | 92.9  | 101.6 |
| 34538603  | ATP6                         | 226  | 25.1  | Metabolic pathways; Huntington's disease; Oxidative phosphorylation; Parkinson's disease; Alzheimer's disease                                            | 106.9 | 109.5 | 86.3  | 97.1  | 112.3 | 100.7 | 95.6  | 96.4  |
| 87252720  | Dhps                         | 369  | 40.6  |                                                                                                                                                          |       | 62.4  |       | 64.3  |       | 110.1 |       | 139.2 |
| 118442832 | Zbtb33                       | 671  | 74    |                                                                                                                                                          | 104.3 | 112.2 | 83.7  | 96.3  | 154.2 | 143.2 | 101.3 | 93.3  |
| 21312179  | Mon1a                        | 556  | 62.1  |                                                                                                                                                          |       |       |       |       |       |       |       |       |
| 71037397  | Rfx5                         | 658  | 69.7  | Primary immunodeficiency; Tuberculosis; Antigen processing and presentation                                                                              | 102.6 | 96.7  | 104.6 | 98.9  | 88.8  | 95.3  | 98.8  | 91.7  |
| 62234443  | Ino80                        | 1559 | 176.4 |                                                                                                                                                          | 101.9 |       | 105.7 |       | 95.9  |       | 96.7  |       |
| 11464971  | Plek                         | 350  | 39.9  |                                                                                                                                                          | 101.4 | 107   | 93.8  | 92    | 149.5 | 142.5 | 88.3  | 83.6  |
| 13385016  | Srsf9                        | 222  | 25.6  | Herpes simplex infection; Spliceosome                                                                                                                    | 98.4  | 107.5 | 90.8  | 94.7  | 90.6  | 95.4  | 130.5 | 119   |
| 268837283 | 5830433<br>M19Rik;<br>Caap1  | 356  | 37.8  |                                                                                                                                                          |       | 110.3 |       | 107.5 |       | 92.5  |       | 96.5  |
| 59624981  | Trex1                        | 314  | 33.7  | Cytosolic DNA-sensing pathway                                                                                                                            | 110.3 | 108.1 | 89.2  | 96.9  | 113.6 | 103.8 | 64    | 88.3  |
| 227908800 | Wdr11                        | 1223 | 135.9 |                                                                                                                                                          | 95.2  | 99.1  | 109.5 | 100.9 | 111.7 | 118.5 | 98.4  | 95.4  |
| 255522964 | Pat11                        | 770  | 86.7  | RNA degradation                                                                                                                                          | 118.7 | 122.2 | 122.9 | 102.1 | 104.5 | 104.6 | 103.5 | 94.7  |
| 170295836 | Trim59                       | 403  | 47.2  |                                                                                                                                                          | 99.9  | 92.8  | 96.3  | 84.9  | 101   | 108.7 | 101   | 94.5  |

|           |                                                                   |      |       |                                                                                                                                                                                                                                                                 |       |       |       |       |       |       |       |       |
|-----------|-------------------------------------------------------------------|------|-------|-----------------------------------------------------------------------------------------------------------------------------------------------------------------------------------------------------------------------------------------------------------------|-------|-------|-------|-------|-------|-------|-------|-------|
| 188497681 | Chfr                                                              | 663  | 73.8  |                                                                                                                                                                                                                                                                 | 108.7 | 125.8 | 119.7 | 103   | 110.1 | 103.4 | 84.6  | 89    |
| 31981125  | Tesc                                                              | 214  | 24.6  |                                                                                                                                                                                                                                                                 | 93.5  | 112.4 | 98.9  | 114.4 | 88.3  | 89.2  | 91.9  | 70.7  |
| 124487366 | Znhit6                                                            | 460  | 52.2  |                                                                                                                                                                                                                                                                 |       |       |       |       |       |       |       |       |
| 256985190 | Zfyve27                                                           | 415  | 46.2  | Endocytosis                                                                                                                                                                                                                                                     | 98.9  |       | 98.3  |       | 97.1  |       | 98    |       |
| 32526865  | Aptx                                                              | 342  | 38.7  |                                                                                                                                                                                                                                                                 | 90.4  | 92.7  | 90.5  | 91.3  | 106.4 | 116   | 117.2 | 108.3 |
| 34538607  | ND4                                                               | 459  | 51.8  | Metabolic pathways; Oxidative phosphorylation; Parkinson's disease                                                                                                                                                                                              | 101   | 104.4 | 90.2  | 96    | 112.7 | 107.9 | 100.7 | 104.5 |
| 23346595  | 2410015<br>M20Rik                                                 | 119  | 13.4  |                                                                                                                                                                                                                                                                 | 98.3  |       | 99.9  |       | 92.4  |       | 101.8 |       |
| 226531205 | Jmjd1c                                                            | 2530 | 281.4 |                                                                                                                                                                                                                                                                 | 101.1 |       | 90.8  |       | 117.3 |       | 91.9  |       |
| 309265938 | Ndufs3;<br>BC002163<br>;<br>LOC1005<br>04968;<br>LOC1026<br>41315 | 106  | 12.6  | Metabolic pathways; Huntington's disease; Non-alcoholic fatty liver disease (NAFLD); Oxidative phosphorylation; Parkinson's disease; Alzheimer's disease                                                                                                        | 84.4  | 122.5 | 165.4 | 208.1 | 114.3 | 74.8  | 82.4  | 81.9  |
| 13385496  | Kbtbd4                                                            | 518  | 58    |                                                                                                                                                                                                                                                                 | 90.4  |       | 97.3  |       | 100.7 |       | 100   |       |
| 13399318  | l7Rn6;<br>Hikeshi                                                 | 197  | 21.6  |                                                                                                                                                                                                                                                                 | 102.9 | 103   | 108.6 | 96.8  | 104.1 | 102.8 | 96.2  | 103.3 |
| 100815972 | Ggh                                                               | 317  | 35.4  | Antifolate resistance; Folate biosynthesis                                                                                                                                                                                                                      | 101.7 | 107.7 | 125.6 | 118.4 | 92.7  | 92.3  | 85    | 95    |
| 153945808 | Ighmbp2                                                           | 993  | 109.3 |                                                                                                                                                                                                                                                                 |       | 98.7  |       | 93.3  |       | 95.2  |       | 104.4 |
| 19526880  | Tmem97                                                            | 176  | 20.8  |                                                                                                                                                                                                                                                                 | 81.3  | 86.2  | 70.9  | 84.8  | 133.7 | 130.8 | 129   | 116.7 |
| 30842792  | Cwf19l2                                                           | 887  | 103.1 |                                                                                                                                                                                                                                                                 | 113.2 | 117.9 | 92.8  | 91.5  | 94.6  | 90.2  | 107.1 | 107.5 |
| 124487419 | Krt2                                                              | 707  | 70.9  |                                                                                                                                                                                                                                                                 |       | 74.1  |       | 97.4  |       | 120.5 |       | 50.5  |
| 283945630 | Tmbim6                                                            | 237  | 26.5  |                                                                                                                                                                                                                                                                 | 86.9  | 87.2  | 96.3  | 98    | 107.2 | 95.6  | 95.5  | 80.2  |
| 300192999 | Jak3                                                              | 1100 | 122.4 | Primary immunodeficiency; Jak-STAT signaling pathway; Epstein-Barr virus infection; Chemokine signaling pathway; Signaling pathways regulating pluripotency of stem cells; HTLV-I infection; PI3K-Akt signaling pathway; Th1 and Th2 cell differentiation; Vira | 101.8 | 97.6  | 87.9  | 88    | 113   | 117   | 90    | 103.3 |
| 61742804  | Wdr20a;<br>Wdr20                                                  | 569  | 62.8  |                                                                                                                                                                                                                                                                 | 108.1 |       | 125.2 |       | 99.2  |       | 102.5 |       |
| 70608133  | Dhx58                                                             | 678  | 76.7  | RIG-I-like receptor signaling pathway                                                                                                                                                                                                                           |       | 101.1 |       | 90.8  |       | 94.3  |       | 107.5 |
| 30424938  | Bola3                                                             | 110  | 12.2  |                                                                                                                                                                                                                                                                 | 90.9  | 104.4 | 100.2 | 97.3  | 92    | 102.3 | 107.4 | 117.8 |
| 226531227 | Trip11                                                            | 1976 | 226.3 |                                                                                                                                                                                                                                                                 | 97.7  | 98.2  | 97.2  | 97.4  | 106.2 | 112.2 | 111.2 | 100.1 |
| 6678445   | Tspyl1                                                            | 379  | 43    |                                                                                                                                                                                                                                                                 | 96.4  | 105.9 | 97.2  | 91.1  | 107.3 | 101.7 | 105.6 | 110.5 |
| 10181162  | Akip1                                                             | 212  | 24    |                                                                                                                                                                                                                                                                 |       |       |       |       |       |       |       |       |
| 110625942 | Tdrkh                                                             | 560  | 62.1  |                                                                                                                                                                                                                                                                 | 97.8  |       | 105.6 |       | 137.3 |       | 101.7 |       |
| 42734476  | BC024479<br>; Msantd2                                             | 559  | 61.3  |                                                                                                                                                                                                                                                                 | 102.9 | 81.7  | 96.3  | 81.6  | 102.5 | 96.4  | 95.8  | 100.7 |
| 16716447  | Mrpl27;<br>Gm6304                                                 | 148  | 15.9  | Ribosome                                                                                                                                                                                                                                                        | 115.8 |       | 102.1 |       | 108.7 |       | 102.3 |       |

|           |                            |      |       |                                                                          |       |       |       |       |       |       |       |       |
|-----------|----------------------------|------|-------|--------------------------------------------------------------------------|-------|-------|-------|-------|-------|-------|-------|-------|
| 62526130  | Nktr                       | 1453 | 163.4 |                                                                          | 88.4  | 94    | 87.5  | 91.7  | 122   | 118.2 | 113.7 | 103.3 |
| 13386144  | Mfsd10                     | 456  | 49.3  |                                                                          | 92.8  |       | 92.8  |       | 156.3 |       | 98    |       |
| 46402201  | Hdac4                      | 1076 | 118.5 | Epstein-Barr virus infection, Alcononism, viral oncogenesis              |       | 111.1 |       | 104.3 |       | 104.6 |       | 90.9  |
| 28076975  | Ak6; Taf9                  | 172  | 19.9  | Metabolic pathways; Purine metabolism; Ribosome biogenesis in eukaryotes | 70.4  |       | 74.1  |       | 130.3 |       | 144.2 |       |
| 20270297  | Tmlhe                      | 421  | 49.6  | Lysine degradation                                                       | 92.5  | 97.8  | 96.1  | 94.6  | 104.3 | 94.4  | 107.5 | 101.3 |
| 323423025 | Ankrd11                    | 2643 | 296   |                                                                          | 96.2  |       | 98.1  |       | 97.8  |       | 102.5 |       |
| 226494207 | Pap0lg                     | 739  | 82.9  | mRNA surveillance pathway                                                | 114.7 |       | 94.9  |       | 81.1  |       | 120.4 |       |
| 29826332  | Mrpl47                     | 252  | 29.7  |                                                                          | 84.9  | 91.5  | 96.9  | 89.8  | 114.8 | 107.7 | 113.8 | 125.6 |
| 124358940 | Tbc1d9b                    | 1246 | 139.8 |                                                                          | 115.3 |       | 117.1 |       | 90.1  |       | 88.3  |       |
| 93277108  | Akr1e1                     | 301  | 34.4  |                                                                          | 100.6 |       | 78.7  |       | 108.4 |       | 107.2 |       |
| 309265363 | LOC100046223; LOC102642592 | 145  | 17.1  |                                                                          | 105.5 | 98.4  | 93.8  | 100.9 | 101.4 | 104.3 | 131.3 | 83.9  |
| 32567788  | Picalm                     | 660  | 71.5  |                                                                          | 87.9  | 105.6 | 108.4 | 105.7 | 92.3  | 83.8  | 91.1  | 95.5  |
| 158517917 | Nhej1                      | 295  | 32.7  | Non-homologous end-joining                                               | 108.1 | 119   | 109.8 | 115.1 | 75.8  | 77.6  | 104.2 | 92.6  |
| 19527236  | Tmed4                      | 227  | 26    |                                                                          | 99.6  | 97.8  | 91.8  | 93    | 108.7 | 105.6 | 106.4 | 108.1 |
| 60593059  | Acd                        | 416  | 44.7  |                                                                          | 106.4 |       | 96.4  |       | 104.3 |       | 100.2 |       |
| 145587671 | Ncoa6                      | 2069 | 219.8 |                                                                          | 108.9 | 100.6 | 94.6  | 97.4  | 86.4  | 108.3 | 76.6  | 93.9  |
| 222418579 | Spg20                      | 671  | 72.6  | Endocytosis                                                              | 101.8 |       | 94.4  |       | 94.4  |       | 121.5 |       |
| 84370294  | Cd69                       | 199  | 22.5  |                                                                          | 32.8  | 35.1  | 31.7  | 31.9  | 165.6 | 160.4 | 164.5 | 157.3 |
| 21312862  | Spe24                      | 201  | 23.4  |                                                                          | 61    | 67    | 65.2  | 70.2  | 143.2 | 146.9 | 154.3 | 139.7 |
| 22208995  | Riok1                      | 567  | 64.9  | Ribosome biogenesis in eukaryotes                                        | 96.7  | 95.8  | 84.9  | 93.6  | 108.2 | 105.7 | 112.6 | 115.1 |
| 93102421  | Map3k4                     | 1597 | 179.7 | MAPK signaling pathway; GnRH signaling pathway                           | 223.7 | 102.5 | 99.9  | 100.7 | 81.5  | 92.3  | 77.4  | 106.5 |
| 124001562 | Vamp5                      | 102  | 11.4  | SNARE interactions in vesicular transport                                | 107.7 |       | 106.9 |       | 102.7 |       | 75.1  |       |
| 224809389 | Acbd6                      | 282  | 30.9  |                                                                          | 93    | 88.3  | 91.5  | 93.5  | 118.2 | 120.6 | 111.4 | 118.8 |
| 30425166  | Mars2                      | 586  | 65.8  | Secinocompound metabolism; Aminoacyl-tRNA biosynthesis                   |       |       |       |       |       |       |       |       |
| 32490570  | Pdrg1                      | 133  | 15.4  |                                                                          | 76.7  | 80.2  | 81.5  | 85.6  | 104   | 109.6 | 162.3 | 184.2 |
| 38348566  | H1fx                       | 188  | 20.1  |                                                                          |       | 108.1 |       | 117.1 |       | 87.9  |       | 108.9 |
| 6756009   | Dctn6                      | 190  | 20.7  | Vasopressin-regulated water reabsorption                                 | 106.3 | 94.8  | 107.9 | 93.5  | 105.7 | 109.7 | 98.3  | 98.3  |
| 157266281 | Trappc5                    | 188  | 20.8  |                                                                          | 103.4 | 104.5 | 91.4  | 87.5  | 102.9 | 104   | 98.7  | 99.2  |
| 13384938  | Ergic3                     | 383  | 43.2  |                                                                          | 88.6  | 101.4 | 97.8  | 92.6  | 132.1 | 106.4 | 100.9 | 102.8 |
| 12963687  | Ssna1                      | 119  | 13.5  |                                                                          | 111.6 | 108.4 | 88.9  | 84.2  | 90.6  | 85.9  | 113.7 | 119.8 |
| 281371347 | Slc35b3                    | 413  | 45.6  |                                                                          | 99.1  | 93.1  | 88.1  | 79.5  | 121   | 123   | 93.1  | 98.9  |
| 209862959 | Numb                       | 653  | 70.8  | Notch signaling pathway                                                  | 99.4  |       | 108.3 |       | 91.7  |       | 98.1  |       |
| 9055336   | Gipc1                      | 333  | 36.1  |                                                                          | 91.7  |       | 94.5  |       | 108.8 |       | 106.7 |       |
| 160333430 | Psmg4                      | 123  | 14    |                                                                          |       | 150.2 |       | 85.6  |       | 99.6  |       | 102.8 |

|           |                                |      |       |                                                                                                                                                          |       |       |       |       |       |       |       |       |
|-----------|--------------------------------|------|-------|----------------------------------------------------------------------------------------------------------------------------------------------------------|-------|-------|-------|-------|-------|-------|-------|-------|
| 21539587  | Ndufa3                         | 84   | 9.3   | Metabolic pathways; Huntington's disease; Non-alcoholic fatty liver disease (NAFLD); Oxidative phosphorylation; Parkinson's disease; Alzheimer's disease | 94.3  | 93.6  | 99.9  | 101   | 102   | 129.6 | 93.1  | 83.4  |
| 6755470   | Serf1                          | 62   | 7.3   |                                                                                                                                                          | 120.1 | 120.2 | 117.7 | 115.9 | 75.4  | 78.5  | 98.2  | 99    |
| 12963697  | Fahd1                          | 227  | 25.2  | Metabolic pathways; Tyrosine metabolism                                                                                                                  | 109.3 | 102   | 89.1  | 98    | 105.3 | 102.9 | 99.2  | 100.2 |
| 113199761 | Ptpn18                         | 453  | 50.2  |                                                                                                                                                          | 170.3 | 147.3 | 97.6  | 110.2 | 122.6 | 88.7  | 74.8  | 87.8  |
| 21704004  | Rabif                          | 123  | 13.9  |                                                                                                                                                          | 107.7 | 101.9 | 109.8 | 101.1 | 97.1  | 92.2  | 93.2  | 97.3  |
| 29789024  | Slc25a17                       | 307  | 34.4  | Peroxisome                                                                                                                                               | 107.2 |       | 87.2  |       | 120.8 |       | 97.5  |       |
| 61656182  | Wdr91                          | 748  | 83.4  |                                                                                                                                                          |       |       |       |       |       |       |       |       |
| 225543150 | Dlgap5                         | 808  | 90.2  |                                                                                                                                                          | 84.5  | 69.3  | 58.1  | 55.7  | 164.6 | 172.5 | 151.8 | 174.8 |
| 226052002 | Mtss1                          | 759  | 82.4  |                                                                                                                                                          |       | 98    |       | 94.7  |       | 96.8  |       | 114.2 |
| 21624631  | Arxes1;<br>Arxes2              | 180  | 20.1  | Protein export                                                                                                                                           |       |       |       |       |       |       |       |       |
| 294610683 | Mcart1;<br>Slc25a51            | 298  | 33.7  |                                                                                                                                                          | 98.7  |       | 165.3 |       | 87.5  |       | 82.5  |       |
| 27532967  | Tmem168                        | 697  | 79.6  |                                                                                                                                                          |       | 72.8  |       | 82.5  |       | 92    |       | 93.2  |
| 27369788  | Rufy1                          | 712  | 80.3  | Endocytosis                                                                                                                                              | 104.2 | 146.6 | 99.5  | 96.2  | 100.9 | 99.1  | 92    | 99.2  |
| 31542003  | Ceny                           | 341  | 39.4  |                                                                                                                                                          | 104.8 | 83.9  | 98.4  | 76    | 104.2 | 76.5  | 104   | 87.6  |
| 256223449 | Zfp407                         | 2246 | 245.8 |                                                                                                                                                          | 120.3 | 102.5 | 95.8  | 104.8 | 93.4  | 95.4  | 79.1  | 109.2 |
| 281485553 | Parp4                          | 1969 | 216   | Base excision repair; Apoptosis                                                                                                                          | 111.8 |       | 103   |       | 112.1 |       | 88.6  |       |
| 6755851   | Top3b                          | 862  | 96.9  | Homologous recombination; Fanconi anemia pathway                                                                                                         | 112   | 106   | 88    | 87.5  | 128.8 | 110.3 | 107.9 | 98.1  |
| 262073043 | Slc39a11                       | 342  | 35.4  |                                                                                                                                                          | 93.2  | 103.3 | 86.2  | 82.4  | 108.7 | 112.2 | 119.6 | 99.5  |
| 9845295   | Rpl36al;<br>Rpl36a;<br>Rpl36a- | 106  | 12.4  | Ribosome                                                                                                                                                 | 91.6  | 93.1  | 98.9  | 99.1  | 112.9 | 114.2 | 62    | 61    |
| 157278527 | Cep170                         | 1578 | 173.8 |                                                                                                                                                          | 113.7 | 126.8 | 127   | 93.8  | 125   | 102.3 | 82.9  | 99.7  |
| 124486879 | Clasp1                         | 1536 | 169.2 |                                                                                                                                                          | 87.1  | 84.7  | 80.8  | 79.9  | 115.4 | 119.2 | 124.9 | 126.2 |
| 124487335 | Ap4e1                          | 1122 | 124.8 | Lysosome                                                                                                                                                 | 112.9 |       | 100   |       | 99.7  |       | 113.5 |       |
| 268370231 | Trim30d                        | 497  | 57.5  |                                                                                                                                                          | 117.5 | 109.8 | 87.8  | 95    | 94.6  | 109.4 | 109.9 | 84.4  |
| 87196345  | 8030462N<br>17Rik              | 399  | 42.8  |                                                                                                                                                          |       | 108.8 |       | 96.4  |       | 96.8  |       | 97.8  |
| 254826792 | Map3k7                         | 606  | 67.2  |                                                                                                                                                          |       | 87    |       | 99.8  |       | 98.8  |       | 115.3 |
| 21312268  | Tmem55a                        | 257  | 28    | Phosphatidylinositol signaling system                                                                                                                    |       |       |       |       |       |       |       |       |
| 40254642  | Dlg1                           | 927  | 102.9 |                                                                                                                                                          |       | 96.4  |       | 88    |       | 100.2 |       | 127.7 |
| 145966752 | Atg12                          | 141  | 15.2  | FoxO signaling pathway; NOD-like receptor signaling pathway; RIG-I-like receptor signaling pathway; Autophagy                                            | 133.4 | 104   | 98    | 93.5  | 87.8  | 95    | 105.4 | 109.6 |
| 269973873 | Cdk19                          | 501  | 56.5  |                                                                                                                                                          | 108.3 | 106.1 | 104.7 | 116.9 | 97.2  | 123.3 | 94.8  | 83.6  |
| 227908861 | Kif3b                          | 747  | 85.2  |                                                                                                                                                          | 111.9 |       | 114   |       | 98    |       | 84.8  |       |
| 29126193  | D19Ert3<br>86e;<br>R3hce11     | 775  | 84.4  |                                                                                                                                                          | 114.1 | 108.2 | 99.2  | 109   | 95.1  | 84.4  | 96.6  | 95.7  |

|           |                   |      |       |                                                                                                                                                                                                                                                                 |       |       |       |       |       |       |       |       |
|-----------|-------------------|------|-------|-----------------------------------------------------------------------------------------------------------------------------------------------------------------------------------------------------------------------------------------------------------------|-------|-------|-------|-------|-------|-------|-------|-------|
| 76559944  | Tamm41            | 337  | 37.9  |                                                                                                                                                                                                                                                                 | 121.5 | 118.3 | 103.7 | 103.2 | 96.9  | 96.2  | 94.5  | 102.9 |
| 237681187 | Rgs1              | 209  | 24.1  |                                                                                                                                                                                                                                                                 | 98.4  | 107.4 | 56.1  | 76.5  | 148   | 140.2 | 179.4 | 150.4 |
| 15451840  | Abca7             | 2159 | 236.7 | ABC transporters                                                                                                                                                                                                                                                |       |       |       |       |       |       |       |       |
| 356995934 | D16Ert4<br>72e    | 290  | 32.9  |                                                                                                                                                                                                                                                                 | 113.9 |       | 93.9  |       | 99.7  |       | 102.4 |       |
| 21450083  | Rprd1a            | 312  | 35.7  |                                                                                                                                                                                                                                                                 | 101.2 | 105.6 | 82.5  | 91.1  | 103.4 | 101.8 | 107.3 | 111   |
| 7305123   | Gzmb              | 247  | 27.5  | Allograft rejection; Transcriptional misregulation in cancer; Graft-versus-host disease; Type I diabetes mellitus; Natural killer cell mediated cytotoxicity; Autoimmune thyroid disease; Apoptosis                                                             |       | 73.5  |       | 89.4  |       | 129   |       | 116.8 |
| 6753654   | Dnase2a           | 353  | 38.8  | Lysosome                                                                                                                                                                                                                                                        | 140.5 | 123.6 | 102.9 | 93.5  | 132.4 | 96.8  | 88.8  | 108.4 |
| 23943898  | Irak4             | 459  | 50.8  | Chagas disease (American trypanosomiasis); NOD-like receptor signaling pathway; Toxoplasmosis; Tuberculosis; Toll-like receptor signaling pathway; Pertussis; Neurotrophin signaling pathway; Influenza A; NF-kappa B signaling pathway; Leishmaniasis; Measles | 103.3 | 103.1 | 120.1 | 114.2 | 102   | 108.5 | 94.1  | 93.6  |
| 31712008  | Ckap2l            | 745  | 82.9  |                                                                                                                                                                                                                                                                 | 84.9  | 82.2  | 77.7  | 97.5  | 121   | 125.4 | 140.4 | 128.6 |
| 21450195  | Ccdc92            | 314  | 35.2  |                                                                                                                                                                                                                                                                 | 128   | 106.3 | 117.1 | 114.7 | 83.8  | 100.5 | 97.4  | 83.5  |
| 124486684 | Trappc10          | 1258 | 141.4 |                                                                                                                                                                                                                                                                 | 105.1 | 110.8 | 98.1  | 91.9  | 90.1  | 92    | 98.2  | 93.6  |
| 21312414  | Trub1             | 338  | 36.3  |                                                                                                                                                                                                                                                                 | 95.5  |       | 89.3  |       | 103.3 |       | 108.8 |       |
| 113462002 | Zfp41             | 198  | 22.7  |                                                                                                                                                                                                                                                                 | 115.7 | 117.2 | 103.9 | 109.5 | 97.9  | 91.3  | 88.4  | 91.8  |
| 164519050 | Ngp               | 167  | 19.3  |                                                                                                                                                                                                                                                                 | 192.6 | 228.7 | 123.1 | 134.4 | 80.8  | 75.7  | 91.9  | 64.3  |
| 158749567 | Ubn2              | 1314 | 141.7 |                                                                                                                                                                                                                                                                 |       |       |       |       |       |       |       |       |
| 256225462 | Polr3d            | 398  | 44.3  | RNA polymerase; Epstein-Barr virus infection; Metabolic pathways; Purine metabolism; Pyrimidine metabolism; Cytosolic DNA-sensing pathway                                                                                                                       | 92.8  | 96.5  | 83.1  | 87.6  | 108   | 100   | 114.1 | 106.8 |
| 27229278  | Agpat3            | 376  | 43.3  | Phospholipase D signaling pathway; Metabolic pathways; Glycerophospholipid metabolism; Glycerolipid metabolism                                                                                                                                                  | 97.5  | 90.3  | 125.5 | 113.6 | 89.1  | 99.5  | 86.3  | 91.2  |
| 19527150  | Pot1a             | 640  | 70.8  |                                                                                                                                                                                                                                                                 | 88.6  | 101.4 | 91.6  | 92.4  | 102.9 | 118.5 | 111.1 | 103.5 |
| 6754902   | Ntan1             | 310  | 34.6  |                                                                                                                                                                                                                                                                 | 103.9 | 90.4  | 106.7 | 117.1 | 112.6 | 86.9  | 83.8  | 90.7  |
| 124249339 | Ttc13             | 759  | 85    |                                                                                                                                                                                                                                                                 | 94.3  | 98.1  | 102.5 | 102.2 | 114.4 | 115   | 93.2  | 98.5  |
| 195947387 | Pole              | 2283 | 261.9 | DNA replication; Metabolic pathways; HTLV-I infection; Purine metabolism; Nucleotide excision repair; Pyrimidine metabolism; Base excision repair                                                                                                               | 87.7  | 85.2  | 88.1  | 104.3 | 109.9 | 121.4 | 119   | 116.5 |
| 85861241  | Hivep2            | 2430 | 266.5 |                                                                                                                                                                                                                                                                 | 113.2 | 118.4 | 101.3 | 90.1  | 99.7  | 87.6  | 107.1 | 95.6  |
| 41235779  | Trim56            | 734  | 79.5  |                                                                                                                                                                                                                                                                 | 105.4 | 95    | 96.2  | 108.2 | 100.7 | 106.9 | 102.7 | 86.5  |
| 111162659 | Dcun1d2           | 259  | 30    |                                                                                                                                                                                                                                                                 | 98.5  |       | 94.6  |       | 102   |       | 109.2 |       |
| 13385862  | Jagn1             | 183  | 21.1  |                                                                                                                                                                                                                                                                 | 97.5  | 98.9  | 87.7  | 85    | 103.3 | 107.4 | 81.5  | 96.4  |
| 37674238  | Ssh2              | 1423 | 158.1 | Regulation of actin cytoskeleton; Axon guidance                                                                                                                                                                                                                 | 86.1  | 103.7 | 94.4  | 95.8  | 111.1 | 109.3 | 115.4 | 110.5 |
| 21312554  | 2010107E<br>04Rik | 58   | 6.7   |                                                                                                                                                                                                                                                                 | 89.2  | 93    | 89.5  | 85.5  | 95.2  | 91.4  | 116.6 | 113.2 |
| 17298676  | Mrpl43            | 159  | 17.9  |                                                                                                                                                                                                                                                                 | 99.7  | 93.1  | 100.2 | 104.7 | 112.1 | 120.3 | 80.1  | 74.4  |

|           |                                                |      |       |                                                                                                                                                                                                                                                                 |       |       |       |       |       |       |       |       |
|-----------|------------------------------------------------|------|-------|-----------------------------------------------------------------------------------------------------------------------------------------------------------------------------------------------------------------------------------------------------------------|-------|-------|-------|-------|-------|-------|-------|-------|
| 22122529  | Cdca7l                                         | 438  | 50.2  |                                                                                                                                                                                                                                                                 | 95.4  | 99.3  | 92.9  | 94.8  | 104.2 | 104.7 | 108   | 124.7 |
| 29789243  | Sun1                                           | 913  | 101.9 |                                                                                                                                                                                                                                                                 |       | 100.8 |       | 87.6  |       | 108.5 |       | 93.3  |
| 9055212   | Egr3                                           | 387  | 42.6  | Hepatitis B; Viral carcinogenesis                                                                                                                                                                                                                               |       | 80.9  |       | 74.7  |       | 117.7 |       | 131.9 |
| 254910981 | Wdr73                                          | 371  | 40.8  |                                                                                                                                                                                                                                                                 | 104.3 | 81.4  | 83    | 92.6  | 111.3 | 113.3 | 97.5  | 120.7 |
| 226958306 | Sdf2                                           | 219  | 24    |                                                                                                                                                                                                                                                                 |       | 113.9 |       | 96.2  |       | 113.2 |       | 30.4  |
| 110626050 | Them4                                          | 230  | 26    | PI3K-Akt signaling pathway                                                                                                                                                                                                                                      | 108.6 | 114.8 | 118.6 | 101.5 | 83.2  | 100.7 | 94.9  | 94.9  |
| 8394539   | Wbp2                                           | 261  | 28    |                                                                                                                                                                                                                                                                 | 120.1 | 113.4 | 112.4 | 114.9 | 85.1  | 86.3  | 99.9  | 102.4 |
| 149252744 | Atf2;<br>LOC1000<br>47997;<br>LOC1026<br>41666 | 487  | 52.3  | MAPK signaling pathway; Dopaminergic synapse; TNF signaling pathway; Epstein-Barr virus infection; Amphetamine addiction; Hepatitis B; HTLV-I infection; Thyroid hormone synthesis; Longevity regulating pathway; Cocaine addiction; cGMP-PKG signaling pathway |       |       |       |       |       |       |       |       |
| 226958643 | Pdk2                                           | 407  | 46    |                                                                                                                                                                                                                                                                 |       |       |       |       |       |       |       |       |
| 30519925  | Nop16                                          | 178  | 21.1  |                                                                                                                                                                                                                                                                 | 122.7 | 118.3 | 97.5  | 98.2  | 97.3  | 95.5  | 103.4 | 111   |
| 10946984  | Stard3                                         | 446  | 50.4  |                                                                                                                                                                                                                                                                 | 100.4 | 98.6  | 85.4  | 88.2  | 114.7 | 98.4  | 119   | 103.8 |
| 226958568 | BC002230<br>; Nrde2                            | 1167 | 132.7 |                                                                                                                                                                                                                                                                 | 99.9  | 94.4  | 98    | 101.5 | 87.1  | 105.2 | 83.2  | 98.6  |
| 19527238  | Pnpo                                           | 261  | 30.1  | Metabolic pathways; Vitamin B6 metabolism                                                                                                                                                                                                                       | 107.6 | 101.3 | 103.3 | 104.6 | 104.1 | 117.4 | 95.4  | 99.2  |
| 126157488 | Zfp800                                         | 662  | 74.8  |                                                                                                                                                                                                                                                                 | 92    | 86.1  | 90.3  | 83.9  | 90.8  | 81.4  | 100.9 | 101.8 |
| 34328117  | Fosl2                                          | 326  | 35.3  | Osteoclast differentiation                                                                                                                                                                                                                                      | 86    |       | 64.1  |       | 128.9 |       | 149.7 |       |
| 31543865  | Timm22                                         | 194  | 20.1  |                                                                                                                                                                                                                                                                 | 105.9 |       | 96.6  |       | 96.6  |       | 108.3 |       |
| 85677510  | Eif4e2                                         | 245  | 28.2  | mTOR signaling pathway; Insulin signaling pathway; Longevity regulating pathway; HIF-1 signaling pathway; PI3K-Akt signaling pathway; EGFR tyrosine kinase inhibitor resistance; RNA transport                                                                  | 75.5  | 86.5  | 82.8  | 91.9  | 106.7 | 106.5 | 112.4 | 89.8  |
| 134053929 | Coil                                           | 573  | 62.2  |                                                                                                                                                                                                                                                                 | 95    |       | 103   |       | 107.3 |       | 110   |       |
| 86476084  | Ints2                                          | 1198 | 133.4 |                                                                                                                                                                                                                                                                 | 119.3 | 120   | 75.9  | 97    | 103   | 104.3 | 104.7 | 100.2 |
| 57164407  | Tanc1                                          | 1856 | 200.7 |                                                                                                                                                                                                                                                                 | 128.8 | 124.9 | 79.8  | 78    | 98    | 90.3  | 89.7  | 93.7  |
| 124249097 | Rab11fip1                                      | 1166 | 124.9 |                                                                                                                                                                                                                                                                 |       | 84.4  |       | 111.9 |       | 91.8  |       | 128.1 |
| 121583910 | Pms2                                           | 859  | 95.2  | Fanconi anemia pathway; Mismatch repair                                                                                                                                                                                                                         | 107.6 |       | 80.4  |       | 108   |       | 111.6 |       |
| 254588108 | Zcchc6                                         | 1474 | 167   |                                                                                                                                                                                                                                                                 | 101.3 | 105.5 | 97.6  | 90.7  | 110.7 | 116.4 | 102.1 | 90.8  |
| 45592936  | Ppp1r13b                                       | 1087 | 119.1 |                                                                                                                                                                                                                                                                 | 106   |       | 88.3  |       | 81.7  |       | 95.9  |       |
| 226958341 | Tk1                                            | 233  | 25.8  | Metabolic pathways; Pyrimidine metabolism; Drug metabolism - other enzymes                                                                                                                                                                                      |       | 88.9  |       | 51.4  |       | 131.3 |       | 117.3 |
| 161016839 | Btk                                            | 659  | 76.4  | Primary immunodeficiency; Platelet activation; Osteoclast differentiation; B cell receptor signaling pathway; NF-kappa B signaling pathway; Fc epsilon RI signaling                                                                                             | 89.6  | 85.6  | 87.7  | 90.3  | 117.7 | 117.4 | 131.4 | 128.5 |
| 224967065 | Notch1                                         | 2531 | 270.7 | MicroRNAs in cancer; Breast cancer; Dorso-ventral axis formation; Notch signaling pathway; Thyroid hormone signaling pathway; Prion diseases; Th1 and Th2 cell differentiation; Endocrine resistance                                                            | 87.9  | 78.2  | 75    | 84    | 121.2 | 128.1 | 135   | 126.1 |





|           |                   |      |       |                                                                                                                                                                                                                                                               |       |       |       |       |       |       |       |       |
|-----------|-------------------|------|-------|---------------------------------------------------------------------------------------------------------------------------------------------------------------------------------------------------------------------------------------------------------------|-------|-------|-------|-------|-------|-------|-------|-------|
| 13384616  | Gng10             | 68   | 7.2   | Morphine addiction; Cholinergic synapse; Retrograde endocannabinoid signaling; Dopaminergic synapse; Ras signaling pathway; GABAergic synapse; Chemokine signaling pathway; Glutamatergic synapse; Pathways in cancer; Alcoholism; PI3K-Akt signaling pathway | 109.5 | 107.8 | 98.5  | 100.6 | 96.3  | 96.6  | 85.8  | 92.8  |
| 247301241 | Msl2              | 577  | 62.5  |                                                                                                                                                                                                                                                               | 112.1 |       | 97.2  |       | 85.7  |       | 90.3  |       |
| 42794773  | Lcmt1             | 332  | 38.2  |                                                                                                                                                                                                                                                               | 95.6  | 96.3  | 105   | 108.2 | 102.8 | 103.4 | 103.5 | 98.5  |
| 120407043 | Maea              | 396  | 45.3  |                                                                                                                                                                                                                                                               | 97.2  | 93.8  | 92.3  | 83.2  | 107   | 106.7 | 104.7 | 115.4 |
| 31542271  | Zer1              | 779  | 89    |                                                                                                                                                                                                                                                               |       |       |       |       |       |       |       |       |
| 262072988 | Cwc25             | 416  | 48.8  |                                                                                                                                                                                                                                                               | 86.5  |       | 88.3  |       | 107.7 |       | 125.6 |       |
| 6680920   | Cenpa             | 134  | 15.5  |                                                                                                                                                                                                                                                               | 109.3 | 106.4 | 111.2 | 113.1 | 97.3  | 96.2  | 71.9  | 75.5  |
| 13385896  | Rab32             | 223  | 25.1  |                                                                                                                                                                                                                                                               | 103.8 | 104.5 | 105.9 | 107.3 | 94.2  | 89.1  | 101.4 | 104.6 |
| 255982600 | Cep350            | 3095 | 346.2 |                                                                                                                                                                                                                                                               | 115.8 | 108.8 | 101.4 | 102.6 | 95.1  | 101.8 | 89.5  | 96    |
| 254911104 | Fbxo6             | 295  | 34.5  | Protein processing in endoplasmic reticulum                                                                                                                                                                                                                   | 110.8 | 98.7  | 84.7  | 96.3  | 100.2 | 99.2  | 108.4 | 104.7 |
| 31981898  | Usp1              | 784  | 87.4  | Fanconi anemia pathway                                                                                                                                                                                                                                        |       |       |       |       |       |       |       |       |
| 7305335   | Nufip1            | 484  | 54.7  |                                                                                                                                                                                                                                                               |       | 109.3 |       | 101.4 |       | 117.2 |       | 111.1 |
| 300797601 | Lsm6              | 80   | 9.1   | RNA degradation; Spliceosome                                                                                                                                                                                                                                  | 117.4 | 122.5 | 112.6 | 111.9 | 70.9  | 67.2  | 90.1  | 99.1  |
| 19527224  | Csnk1g2           | 442  | 50.3  |                                                                                                                                                                                                                                                               | 96.6  | 94.6  | 96.5  | 94.2  | 106.2 | 117   | 97    | 96.7  |
| 119508435 | Sac3d1            | 427  | 46.4  |                                                                                                                                                                                                                                                               | 94.7  |       | 86    |       | 113.7 |       | 120.1 |       |
| 6754624   | Map2k5            | 448  | 50.1  | Oxytocin signaling pathway; MAPK signaling pathway; Neurotrophin signaling pathway; Gap junction                                                                                                                                                              | 97.5  | 88.7  | 88.2  | 84.5  | 84.2  | 79    | 100.7 | 94.2  |
| 255982608 | Rnf41             | 317  | 35.9  | Endocytosis                                                                                                                                                                                                                                                   |       | 104.5 |       | 86.6  |       | 79.4  |       | 116.7 |
| 29789128  | Mrps30            | 442  | 49.9  |                                                                                                                                                                                                                                                               | 88.7  | 116.7 | 87.5  | 93.6  | 121   | 113.4 | 112.1 | 107.2 |
| 226531047 | Itih4             | 942  | 104.6 |                                                                                                                                                                                                                                                               | 114.3 | 100.5 | 113.8 | 93.4  | 103.7 | 85.1  | 100.1 | 92.5  |
| 165905593 | 2610301B<br>20Rik | 209  | 23.8  |                                                                                                                                                                                                                                                               |       | 114.8 |       | 115.8 |       | 80.6  |       | 97.5  |
| 226371696 | Etnk1             | 363  | 42    | Metabolic pathways; Glycerophospholipid metabolism                                                                                                                                                                                                            | 79.8  |       | 74.9  |       | 117.8 |       | 122.2 |       |
| 13384784  | Ubl5              | 73   | 8.5   |                                                                                                                                                                                                                                                               | 143.9 | 123.5 | 118.1 | 108.3 | 105.6 | 98.9  | 102.9 | 110.7 |
| 34787417  | Fam118b           | 351  | 39.5  |                                                                                                                                                                                                                                                               | 90.8  |       | 103.1 |       | 117   |       | 111.2 |       |
| 227908837 | Pecr              | 303  | 32.4  | Fatty acid metabolism; Biosynthesis of unsaturated fatty acids; Peroxisome                                                                                                                                                                                    |       |       |       |       |       |       |       |       |
| 31541998  | Dpcd              | 203  | 23    |                                                                                                                                                                                                                                                               |       |       |       |       |       |       |       |       |
| 170295844 | Xrcc1             | 631  | 68.9  | Base excision repair                                                                                                                                                                                                                                          | 111.9 | 117.2 | 97.5  | 101.6 | 104   | 107   | 109.1 | 114   |
| 7106277   | Csnk2b            | 215  | 24.9  | Herpes simplex infection; Wnt signaling pathway; Epstein-Barr virus infection; Adherens junction; Ribosome biogenesis in eukaryotes; NF-kappa B signaling pathway; Tight junction; Measles                                                                    | 90.7  | 92.6  | 80.9  | 84.1  | 107.7 | 109.1 | 116.5 | 112.6 |
| 71067130  | Wdr83             | 315  | 34.4  |                                                                                                                                                                                                                                                               | 111.1 |       | 84.7  |       | 115.4 |       | 86.2  |       |
| 22122539  | Dap               | 102  | 11.1  |                                                                                                                                                                                                                                                               | 133   |       | 112.3 |       | 111.1 |       | 79.4  |       |
| 31543120  | Lgals7            | 136  | 15.2  |                                                                                                                                                                                                                                                               | 77.5  |       | 67    |       | 147.3 |       | 138.1 |       |
| 13385958  | Rps27l            | 84   | 9.5   |                                                                                                                                                                                                                                                               | 83.6  | 97.9  | 83.6  | 88    | 125.3 | 122.2 | 151.8 | 125.4 |

|           |                   |      |       |                                                                                                                                                                                                                                                                 |       |       |       |       |       |       |       |       |
|-----------|-------------------|------|-------|-----------------------------------------------------------------------------------------------------------------------------------------------------------------------------------------------------------------------------------------------------------------|-------|-------|-------|-------|-------|-------|-------|-------|
| 90991706  | Zfc3h1            | 1992 | 224.9 |                                                                                                                                                                                                                                                                 |       | 80.1  |       | 80.6  |       | 100.4 |       | 109.1 |
| 21312078  | Deb1;<br>Ss18l2   | 77   | 8.9   |                                                                                                                                                                                                                                                                 |       |       |       |       |       |       |       |       |
| 224967132 | Tbrg1             | 406  | 44.9  |                                                                                                                                                                                                                                                                 |       | 102.7 |       | 105.9 |       | 84.5  |       | 124   |
| 75991700  | Camk2g            | 529  | 59.6  | Oxytocin signaling pathway; ErbB signaling pathway; Wnt signaling pathway; Cholinergic synapse; Dopaminergic synapse; Long-term potentiation; Amphetamine addiction; Tuberculosis; Melanogenesis; Axon guidance; Oocyte meiosis; Proteoglycans in cancer; Neuro | 101.2 | 115.7 | 98.3  | 101.8 | 90.6  | 89.3  | 99.8  | 93.4  |
| 31044465  | Slc25a15          | 301  | 32.8  |                                                                                                                                                                                                                                                                 | 98.6  |       | 95.5  |       | 97.8  |       | 102.8 |       |
| 13386064  | Yeats4            | 227  | 26.5  |                                                                                                                                                                                                                                                                 | 88.1  |       | 96.3  |       | 104.2 |       | 113.8 |       |
| 262263374 | Zfp280c           | 742  | 83.1  |                                                                                                                                                                                                                                                                 | 118.7 | 81.1  | 98.8  | 103.3 | 128.2 | 128.9 | 93.3  | 104.1 |
| 341572571 | Fam193a           | 1518 | 166.9 |                                                                                                                                                                                                                                                                 | 81.1  | 82.8  | 95.1  | 85.8  | 108.6 | 110.5 | 117   | 115.5 |
| 34147169  | Zfp598            | 908  | 99.1  |                                                                                                                                                                                                                                                                 | 123.1 | 105.4 | 111.1 | 113.3 | 114.7 | 110.2 | 114.5 | 114.9 |
| 41056093  | Nif311            | 376  | 41.7  |                                                                                                                                                                                                                                                                 | 109.8 | 98.7  | 108   | 104.5 | 91.9  | 107.2 | 94    | 102.7 |
| 225543181 | Dync11i2          | 492  | 54.2  | Phagosome; Salmonella infection; Vasopressin-regulated water reabsorption                                                                                                                                                                                       | 111   | 92.3  | 90    | 88.5  | 118.3 | 115.8 | 106.8 | 116.6 |
| 242332525 | Ulk3              | 472  | 53.5  | mTOR signaling pathway; Longevity regulating pathway; Autophagy                                                                                                                                                                                                 | 108.8 | 101.6 | 96.7  | 111.9 | 85.7  | 81.8  | 105.1 | 88.2  |
| 28892997  | Ptpn7             | 359  | 40.3  | MAPK signaling pathway                                                                                                                                                                                                                                          | 109.8 | 112.4 | 83.9  | 100.2 | 91.3  | 96.7  | 109.1 | 94.4  |
| 9910548   | Sh3bgr1           | 114  | 12.8  |                                                                                                                                                                                                                                                                 | 147.2 | 139.1 | 123.9 | 123.3 | 86.9  | 69.3  | 72.9  | 95.2  |
| 110347606 | Urod              | 367  | 40.7  | Metabolic pathways; Porphyrin and chlorophyll metabolism                                                                                                                                                                                                        | 84.2  | 82.3  | 98.2  | 116.1 | 119.1 | 130.8 | 100.7 | 90.9  |
| 257196205 | Nsmce2            | 247  | 28.2  |                                                                                                                                                                                                                                                                 |       | 96.7  |       | 91.2  |       | 108.3 |       | 109.8 |
| 33469015  | Prp               | 491  | 55    | Protein digestion and absorption; Renin-angiotensin system                                                                                                                                                                                                      |       |       |       |       |       |       |       |       |
| 57165377  | Tbc1d2b           | 965  | 109.9 |                                                                                                                                                                                                                                                                 | 111.9 | 111   | 117.3 | 108.5 | 92.6  | 105   | 97.8  | 101.9 |
| 58037235  | Oxsm              | 459  | 48.6  | Fatty acid metabolism; Metabolic pathways; Biotin metabolism; Fatty acid biosynthesis                                                                                                                                                                           |       | 107.6 |       | 97.7  |       | 102.9 |       | 86.9  |
| 31982864  | Atp1f1            | 106  | 12.2  |                                                                                                                                                                                                                                                                 | 113   | 105.7 | 99.3  | 100.4 | 93.5  | 96.2  | 108.9 | 114.1 |
| 114145467 | Irf6              | 467  | 53.1  |                                                                                                                                                                                                                                                                 | 105.5 |       | 92.9  |       | 105.1 |       | 104.9 |       |
| 29336066  | Slamf1            | 343  | 38.1  | Measles                                                                                                                                                                                                                                                         | 35.1  | 52.3  | 38.6  | 45.7  | 152.8 | 142.5 | 197   | 184.6 |
| 409971411 | Ncaph2            | 608  | 69    |                                                                                                                                                                                                                                                                 | 75.8  | 96.2  | 80.4  | 75.9  | 122.4 | 112.2 | 127.4 | 119.5 |
| 160333432 | Cep57             | 500  | 56.9  |                                                                                                                                                                                                                                                                 | 127.6 | 115.3 | 111.2 | 98.9  | 93.6  | 85.9  | 91.8  | 100   |
| 21313442  | Utp23             | 249  | 28.4  |                                                                                                                                                                                                                                                                 | 90.3  | 91.1  | 104.6 | 96.1  | 97.2  | 104.7 | 109.7 | 100.7 |
| 110625853 | Zfyve1            | 777  | 86.9  |                                                                                                                                                                                                                                                                 | 113.1 | 123.9 | 95.2  | 92.5  | 95    | 92.7  | 102.8 | 100   |
| 113931152 | 4930453N<br>24Rik | 348  | 39.5  |                                                                                                                                                                                                                                                                 | 120.1 | 108.4 | 108.6 | 108.5 | 104.4 | 91.8  | 98.7  | 106.5 |
| 27414501  | Ercc6l            | 1240 | 138.8 |                                                                                                                                                                                                                                                                 | 94.3  | 98.1  | 92.8  | 88.8  | 108.4 | 120.3 | 104.8 | 111.8 |
| 124249060 | Gins2             | 185  | 21.2  |                                                                                                                                                                                                                                                                 | 89.8  |       | 64.8  |       | 143.2 |       | 161.8 |       |
| 52630436  | Pigu              | 435  | 49.9  | Glycosylphosphatidylinositol (GPI)-anchor biosynthesis; Metabolic pathways                                                                                                                                                                                      | 98.5  | 108.7 | 93.7  | 87    | 100.4 | 103.9 | 100.2 | 102.6 |
| 239835744 | Tfeb              | 534  | 59.4  |                                                                                                                                                                                                                                                                 | 138.2 |       | 113.7 |       | 92    |       | 55.5  |       |
| 313151170 | Gopc              | 463  | 50.6  |                                                                                                                                                                                                                                                                 | 88.3  | 92.6  | 102.9 | 98.6  | 109.5 | 105.7 | 100.2 | 101.9 |

|           |                |      |       |                                                                                                                                                                                                                                                                |       |       |       |       |       |       |       |       |
|-----------|----------------|------|-------|----------------------------------------------------------------------------------------------------------------------------------------------------------------------------------------------------------------------------------------------------------------|-------|-------|-------|-------|-------|-------|-------|-------|
| 6755154   | Cib1           | 191  | 21.8  |                                                                                                                                                                                                                                                                |       | 98.5  |       | 87.6  |       | 112.7 |       | 115.9 |
| 61656186  | Lman2l         | 347  | 39.9  |                                                                                                                                                                                                                                                                | 100.7 | 96.4  | 94.7  | 96.8  | 110.7 | 113.1 | 107.1 | 103   |
| 6678305   | Tfdp1          | 410  | 45.2  | Cell cycle; TGF-beta signaling pathway                                                                                                                                                                                                                         | 87.8  |       | 81    |       | 114.2 |       | 129.1 |       |
| 201025411 | A001962        | 292  | 33.9  |                                                                                                                                                                                                                                                                | 96.2  |       | 95    |       | 99    |       | 114.5 |       |
| 226874846 | Irf1           | 329  | 37.3  | Prolactin signaling pathway; Pertussis; Hepatitis C                                                                                                                                                                                                            | 104.4 |       | 82.7  |       | 125.1 |       | 138.6 |       |
| 62000668  | Fam169b        | 337  | 38.1  |                                                                                                                                                                                                                                                                | 94.2  |       | 82.7  |       | 109.6 |       | 100.7 |       |
| 118403332 | Gramd3         | 432  | 47.9  |                                                                                                                                                                                                                                                                | 119.9 | 105.3 | 109.8 | 100.4 | 98.6  | 99    | 93.1  | 99.4  |
| 11230784  | Cenph          | 241  | 28.1  |                                                                                                                                                                                                                                                                |       | 92.9  |       | 96.2  |       | 114   |       | 116.1 |
| 62000674  | Sp140          | 534  | 62.6  |                                                                                                                                                                                                                                                                | 89.8  | 90.5  | 99.2  | 95    | 93.5  | 99    | 100.3 | 98.1  |
| 46518506  | Amacr          | 381  | 41.7  | Metabolic pathways; Primary bile acid biosynthesis; Peroxisome                                                                                                                                                                                                 | 104.4 | 106.4 | 90    | 91.5  | 108.2 | 105.5 | 103.2 | 103.8 |
| 6680421   | Il1rap         | 570  | 65.7  | Cytokine-cytokine receptor interaction; Inflammatory mediator regulation of TRP channels                                                                                                                                                                       | 55.1  | 82.1  | 58.7  | 80.5  | 163.1 | 208.2 | 155.3 | 105.9 |
| 254281331 | Slc1a4         | 532  | 56    |                                                                                                                                                                                                                                                                |       | 68    |       | 57    |       | 142.7 |       | 146.3 |
| 11968166  | Ctsz           | 306  | 34    | Lysosome; Apoptosis                                                                                                                                                                                                                                            | 170.9 | 169   | 183.6 | 182.2 | 66.4  | 60.5  | 63.2  | 62.8  |
| 168480120 | Rictor         | 1708 | 191.4 | mTOR signaling pathway                                                                                                                                                                                                                                         | 43.3  | 56.6  | 75.5  | 76.7  | 79.4  | 87.4  | 198.4 | 196.1 |
| 55742879  | Stambpl1       | 436  | 49.6  |                                                                                                                                                                                                                                                                | 108.5 | 95.8  | 98.8  | 89.6  | 97.9  | 96    | 92.3  | 90.8  |
| 45544580  | Mapkapk2       | 386  | 44    | MAPK signaling pathway; VEGF signaling pathway; Neurotrophin signaling pathway; Viral carcinogenesis                                                                                                                                                           | 105.5 | 107.2 | 87.3  | 86    | 111.8 | 98.6  | 98.6  | 100.2 |
| 27261818  | Dnajc16        | 772  | 89.1  |                                                                                                                                                                                                                                                                | 104   | 116.9 | 96.5  | 100.5 | 102.7 | 89.2  | 98.9  | 104.3 |
| 6755662   | Srp9           | 86   | 10.2  | Protein export                                                                                                                                                                                                                                                 | 106.1 | 107.3 | 86.4  | 86.4  | 96.6  | 94.5  | 110.7 | 122.1 |
| 170763483 | Ap3m2          | 418  | 46.9  | Lysosome                                                                                                                                                                                                                                                       | 92.8  |       | 84.3  |       | 111.8 |       | 124.9 |       |
| 6679066   | Nipsnap1       | 284  | 33.3  |                                                                                                                                                                                                                                                                | 97.4  | 112.2 | 116.7 | 114.3 | 86.3  | 96.6  | 90.2  | 86.5  |
| 21703808  | Prmt7          | 692  | 78.3  |                                                                                                                                                                                                                                                                |       | 82.3  |       | 78.3  |       | 121.8 |       | 126.1 |
| 20270208  | Ascc2          | 749  | 85.6  |                                                                                                                                                                                                                                                                | 115.7 |       | 82.3  |       | 111.6 |       | 84.4  |       |
| 254675261 | C80913; Uri1   | 531  | 59    |                                                                                                                                                                                                                                                                | 97.3  |       | 97.1  |       | 111.7 |       | 78.4  |       |
| 6678637   | Zbtb14; Zfp161 | 449  | 50.9  |                                                                                                                                                                                                                                                                | 108.5 |       | 102.8 |       | 92.6  |       | 91.4  |       |
| 124486873 | Nlrc3          | 1102 | 119.8 |                                                                                                                                                                                                                                                                | 108.1 |       | 123.4 |       | 77.4  |       | 79.3  |       |
| 485836844 | Itga6          | 1091 | 122.1 | Hypertrophic cardiomyopathy (HCM); Regulation of actin cytoskeleton; Arrhythmogenic right ventricular cardiomyopathy (ARVC); Focal adhesion; Toxoplasmosis; Small cell lung cancer; Dilated cardiomyopathy; Cell adhesion molecules (CAMs); Pathways in cancer |       |       |       |       |       |       |       |       |
| 22094093  | Fgf8           | 268  | 30.4  | Regulation of actin cytoskeleton; MAPK signaling pathway; Ras signaling pathway; Breast cancer; Melanoma; Rap1 signaling pathway; Pathways in cancer; PI3K-Akt signaling pathway                                                                               | 106.6 | 104   | 87.9  | 87.4  | 84.6  | 94    | 122.9 | 125.2 |
| 13591860  | Tollip         | 274  | 30.3  | Toll-like receptor signaling pathway                                                                                                                                                                                                                           | 94.2  | 85.7  | 107.6 | 102.3 | 87.6  | 102.7 | 93.4  | 107.2 |
| 13384678  | Med21          | 144  | 15.6  |                                                                                                                                                                                                                                                                | 91.2  | 109.6 | 93.4  | 89.2  | 92.2  | 96.2  | 121.4 | 100.5 |
| 110665733 | Cd1d2          | 336  | 38.5  | Hematopoietic cell lineage                                                                                                                                                                                                                                     | 101   |       | 109.1 |       | 86.1  |       | 90.4  |       |



|           |                           |      |       |                                                                                                                                                                                                                                                                 |       |       |       |       |       |       |       |       |
|-----------|---------------------------|------|-------|-----------------------------------------------------------------------------------------------------------------------------------------------------------------------------------------------------------------------------------------------------------------|-------|-------|-------|-------|-------|-------|-------|-------|
| 31981686  | Fuk                       | 1090 | 119.2 | Metabolic pathways; Amino sugar and nucleotide sugar metabolism; Fructose and mannose metabolism                                                                                                                                                                |       | 100.4 |       | 103.1 |       | 105.8 |       | 117.6 |
| 237681098 | Exd2                      | 650  | 74.3  |                                                                                                                                                                                                                                                                 | 90.1  | 94.1  | 125.3 | 139.9 | 129.2 | 134.2 | 89.2  | 90.1  |
| 27754027  | Med6                      | 195  | 22.6  |                                                                                                                                                                                                                                                                 | 97.5  | 97.4  | 94.3  | 101.3 | 104.6 | 110.9 | 92    | 74.6  |
| 110611921 | Ttc14                     | 766  | 87.2  |                                                                                                                                                                                                                                                                 | 86.5  |       | 101.8 |       | 98.4  |       | 111   |       |
| 227430358 | No19                      | 714  | 80.8  |                                                                                                                                                                                                                                                                 | 86.4  | 95.5  | 105   | 94.2  | 117.9 | 118.7 | 111.3 | 110.7 |
| 124486662 | Vps51                     | 782  | 86.1  |                                                                                                                                                                                                                                                                 |       | 101.3 |       | 92.9  |       | 108.6 |       | 86    |
| 124487039 | Kidins220                 | 1793 | 199.1 | Neurotrophin signaling pathway                                                                                                                                                                                                                                  | 85.5  | 76.3  | 76.6  | 84.1  | 126.4 | 107.1 | 123.2 | 132   |
| 190610036 | Nck2                      | 380  | 42.9  | ErbB signaling pathway; T cell receptor signaling pathway; Axon guidance                                                                                                                                                                                        |       |       |       |       |       |       |       |       |
| 117606335 | Serpinfl                  | 417  | 46.2  | Wnt signaling pathway                                                                                                                                                                                                                                           | 87.1  |       | 77.5  |       | 112.4 |       | 99.5  |       |
| 6753862   | Fhit                      | 150  | 17.2  | Small cell lung cancer; Purine metabolism; Non-small cell lung cancer                                                                                                                                                                                           | 127.9 | 134.1 | 104.6 | 107.3 | 124.7 | 119.9 | 87.6  | 74.6  |
| 124486983 | Vps8                      | 1429 | 161.2 |                                                                                                                                                                                                                                                                 | 100.7 | 92.7  | 95    | 91    | 110   | 95.5  | 99.7  | 119.5 |
| 169234729 | Lin54                     | 749  | 79.5  |                                                                                                                                                                                                                                                                 | 90.2  | 90.5  | 88.8  | 89.9  | 100.7 | 102   | 157.9 | 151.7 |
| 11528498  | Taf8                      | 308  | 34    | Basal transcription factors                                                                                                                                                                                                                                     |       | 103.6 |       | 96.9  |       | 95.5  |       | 105.7 |
| 113722131 | Setx                      | 2646 | 297.4 |                                                                                                                                                                                                                                                                 | 113.6 | 106.5 | 104.6 | 106.6 | 94.8  | 91.6  | 101.2 | 99.3  |
| 85861229  | Gtf3c2                    | 907  | 100.2 |                                                                                                                                                                                                                                                                 |       |       |       |       |       |       |       |       |
| 114431228 | H2-Eb1                    | 264  | 30.1  | Herpes simplex infection; Staphylococcus aureus infection; Rheumatoid arthritis; Allograft rejection; Toxoplasmosis; Tuberculosis; Cell adhesion molecules (CAMs); HTLV-I infection; Intestinal immune network for IgA production; Inflammatory bowel disease ( |       |       |       |       |       |       |       |       |
| 262231796 | Arid2                     | 1828 | 195.9 |                                                                                                                                                                                                                                                                 | 94.6  | 99.6  | 95.1  | 96.3  | 105   | 111.4 | 101.5 | 106.7 |
| 124249099 | Prdm10                    | 1135 | 127.8 |                                                                                                                                                                                                                                                                 | 89    | 107.2 | 98.4  | 100.6 | 120.5 | 106.1 | 98.2  | 79.8  |
| 124486797 | Scaper                    | 1398 | 157.7 |                                                                                                                                                                                                                                                                 | 78.9  | 92.9  | 83.7  | 77    | 106.1 | 94.5  | 131.4 | 140.6 |
| 145966840 | Epx                       | 716  | 81.3  | Asthma                                                                                                                                                                                                                                                          | 136   | 131   | 239.1 | 224.2 | 60    | 57.8  | 51.3  | 55.2  |
| 21362329  | Nmnat3                    | 245  | 27.7  | Metabolic pathways; Nicotinate and nicotinamide metabolism                                                                                                                                                                                                      | 116.2 | 103.7 | 92.2  | 95.2  | 106.1 | 100.4 | 70.4  | 102.2 |
| 254826797 | Mad211bp                  | 276  | 31.1  |                                                                                                                                                                                                                                                                 | 96.5  | 103.8 | 103   | 106.2 | 107.1 | 103.2 | 103.5 | 97.8  |
| 75677466  | Zfp865                    | 1058 | 111.6 |                                                                                                                                                                                                                                                                 | 97.9  |       | 104.7 |       | 107.2 |       | 86.2  |       |
| 158966725 | 2310008H09Rik; Krop1      | 532  | 59.6  |                                                                                                                                                                                                                                                                 | 75.3  | 77.1  | 76.5  | 76.8  | 116.8 | 113.5 | 126   | 130.4 |
| 407261882 | LOC10044398; LOC102641641 | 219  | 23.9  |                                                                                                                                                                                                                                                                 | 86.1  | 75.7  | 93.2  | 96.8  | 113.4 | 116.8 | 89.3  | 88.6  |
| 21313376  | Tmem41a                   | 264  | 29.4  |                                                                                                                                                                                                                                                                 | 99.6  | 90.1  | 104.1 | 103.2 | 101.6 | 107.4 | 88    | 98.4  |
| 58037169  | Ccdc115                   | 180  | 19.7  |                                                                                                                                                                                                                                                                 | 96.3  | 99.6  | 93.9  | 100.2 | 102.8 | 103   | 106.1 | 104.6 |
| 13385882  | Rer1                      | 196  | 23    |                                                                                                                                                                                                                                                                 | 84.9  | 92.4  | 90.1  | 87.2  | 119.3 | 106.6 | 116.8 | 81.3  |
| 256665234 | Nt5c2                     | 586  | 67.7  |                                                                                                                                                                                                                                                                 | 63    |       | 150.2 |       | 75    |       | 57    |       |
| 31980980  | Gps2                      | 327  | 36.7  | HTLV-I infection                                                                                                                                                                                                                                                | 109.6 | 108.8 | 92.8  | 99.5  | 103.4 | 100   | 119.1 | 117.8 |

|           |                |      |       |                                                                                                                                                                 |       |       |       |       |       |       |       |       |
|-----------|----------------|------|-------|-----------------------------------------------------------------------------------------------------------------------------------------------------------------|-------|-------|-------|-------|-------|-------|-------|-------|
| 29789389  | Itpk1          | 419  | 46.1  | Metabolic pathways; Inositol phosphate metabolism; Phosphatidylinositol signaling system                                                                        | 97.9  |       | 94.3  |       | 93.9  |       | 91.1  |       |
| 61098160  | Adat2          | 191  | 21.3  |                                                                                                                                                                 |       | 115.9 |       | 113.3 |       | 125.9 |       | 107.2 |
| 253314487 | Card6          | 1175 | 131.4 | NOD-like receptor signaling pathway                                                                                                                             | 97.9  |       | 106.9 |       | 110.8 |       | 92.1  |       |
| 110625673 | Aagab          | 316  | 34.5  |                                                                                                                                                                 | 153.8 | 149.8 | 99    | 111.6 | 111.9 | 110.2 | 88.3  | 84.2  |
| 21450345  | Med17          | 649  | 72.4  | Thyroid hormone signaling pathway                                                                                                                               |       | 93.3  |       | 97.3  |       | 105.9 |       | 115.3 |
| 183396774 | Bckdha         | 446  | 50.7  | Valine, leucine and isoleucine degradation; Metabolic pathways; Propanoate metabolism                                                                           | 105.9 | 110.8 | 93.3  | 95.1  | 105   | 108.4 | 108   | 102   |
| 91206400  | Bcl9l          | 1494 | 156.6 |                                                                                                                                                                 |       |       |       |       |       |       |       |       |
| 84875506  | Rapgef1        | 1224 | 136.4 | Focal adhesion; Insulin signaling pathway; Neurotrophin signaling pathway; Rap1 signaling pathway; Renal cell carcinoma                                         | 106.6 | 91    | 97.9  | 97.8  | 88.3  | 90.5  | 106   | 106.9 |
| 58037125  | Dpm3           | 92   | 10.1  | Metabolic pathways; N-Glycan biosynthesis                                                                                                                       | 100.4 |       | 107.3 |       | 99.3  |       | 86.8  |       |
| 229577171 | Ralgps2        | 590  | 65.5  |                                                                                                                                                                 | 97.4  | 108.8 | 103.9 | 108.2 | 97    | 104.1 | 63.3  | 61.9  |
| 172072657 | Alg2           | 415  | 47.4  | Metabolic pathways; N-Glycan biosynthesis                                                                                                                       | 89.4  |       | 92    |       | 93.3  |       | 87.5  |       |
| 7304955   | Cd84           | 329  | 37.3  |                                                                                                                                                                 | 95.7  | 98    | 94.4  | 97.7  | 98.2  | 90.6  | 103.1 | 99.6  |
| 31543952  | Wars2          | 360  | 40.1  | Aminoacyl-tRNA biosynthesis                                                                                                                                     | 104.7 |       | 118.1 |       | 111.2 |       | 88.2  |       |
| 254540120 | Wrnip1         | 660  | 71.7  |                                                                                                                                                                 |       |       |       |       |       |       |       |       |
| 32189430  | Aida           | 305  | 34.9  |                                                                                                                                                                 | 100.4 | 109.8 | 109.7 | 102.6 | 130   | 114.1 | 90.7  | 102.1 |
| 84872191  | Ptplb; Hacd2   | 254  | 28.4  | Fatty acid metabolism; Fatty acid elongation; Biosynthesis of unsaturated fatty acids                                                                           | 117.3 | 122   | 103.4 | 112.2 | 91.9  | 94.6  | 99.5  | 96.1  |
| 30350202  | Gorasp1        | 446  | 46.9  |                                                                                                                                                                 |       |       |       |       |       |       |       |       |
| 26986609  | Pced1b         | 433  | 49.9  |                                                                                                                                                                 | 81.1  | 91    | 94.4  | 94.7  | 115.9 | 111.1 | 98.2  | 101.3 |
| 12963573  | Dctpp1         | 170  | 18.8  | Metabolic pathways; Pyrimidine metabolism                                                                                                                       |       | 107.5 |       | 92.7  |       | 99.6  |       | 117   |
| 226958485 | Zc3h7a         | 970  | 110.7 |                                                                                                                                                                 |       |       |       |       |       |       |       |       |
| 13752573  | Lamtor2        | 125  | 13.5  | mTOR signaling pathway                                                                                                                                          | 101.2 | 98.8  | 106.2 | 105.6 | 91.9  | 90.2  | 94.4  | 102.8 |
| 33859492  | Kdm6a          | 1424 | 157.4 |                                                                                                                                                                 | 103.7 | 127.2 | 94.7  | 107.1 | 97.3  | 83.6  | 137.2 | 68.4  |
| 29789239  | Gns            | 544  | 61.1  | Metabolic pathways; Lysosome; Glycosaminoglycan degradation                                                                                                     | 119.7 | 106.1 | 102.9 | 102.3 | 102.9 | 108   | 82.3  | 85.7  |
| 110347495 | Lrrc58         | 366  | 40.1  |                                                                                                                                                                 | 81.6  |       | 72.9  |       | 111.7 |       | 118.1 |       |
| 226246602 | Mrps10         | 201  | 22.8  |                                                                                                                                                                 | 98.4  | 92.7  | 87.3  | 86.5  | 107.4 | 112.8 | 114.3 | 114.7 |
| 18252782  | Serpinc1       | 465  | 52    | Complement and coagulation cascades                                                                                                                             |       | 96.6  |       | 78.5  |       | 99.9  |       | 127   |
| 228008331 | Arfp2          | 341  | 37.7  |                                                                                                                                                                 | 105.7 |       | 115.9 |       | 108.4 |       | 89.6  |       |
| 77861908  | Ppapdc2; Plpp6 | 292  | 31.7  |                                                                                                                                                                 | 108.9 |       | 86.9  |       | 101.8 |       | 91.8  |       |
| 219881031 | Polr2l         | 67   | 7.6   | RNA polymerase; Epstein-Barr virus infection; Metabolic pathways; Purine metabolism; Huntington's disease; Pyrimidine metabolism; Cytosolic DNA-sensing pathway | 96.9  | 87.4  | 95    | 97.5  | 97.7  | 104.1 | 104.3 | 103.7 |
| 226423912 | Zc3h12d        | 533  | 59.1  |                                                                                                                                                                 | 70    | 90.3  | 66.8  | 75.7  | 139.7 | 142.1 | 137.7 | 125.4 |
| 6680411   | Il17ra         | 864  | 97.7  | Cytokine-cytokine receptor interaction                                                                                                                          | 132.8 |       | 103   |       | 110.1 |       | 105.3 |       |
| 237874270 | Galnt1         | 559  | 64.2  | Metabolic pathways; Mucin type O-glycan biosynthesis                                                                                                            | 102.1 | 89.1  | 92.4  | 98.6  | 103.4 | 105.5 | 108.5 | 98.1  |

|           |                             |      |       |                                                                                                                                                                                      |       |       |       |       |       |       |       |       |
|-----------|-----------------------------|------|-------|--------------------------------------------------------------------------------------------------------------------------------------------------------------------------------------|-------|-------|-------|-------|-------|-------|-------|-------|
| 101944546 | Map3k1                      | 1493 | 161.3 | MAPK signaling pathway; Ubiquitin mediated proteolysis; RIG-I-like receptor signaling pathway; Hepatitis B; HTLV-I infection; Neurotrophin signaling pathway; GnRH signaling pathway |       |       |       |       |       |       |       |       |
| 226342951 | Emc10                       | 268  | 28.2  |                                                                                                                                                                                      | 97.5  | 94    | 88.6  | 92.4  | 115.6 | 113.3 | 106.2 | 109.9 |
| 45598396  | Prkar2b                     | 416  | 46.1  | Insulin signaling pathway                                                                                                                                                            | 99    |       | 102.2 |       | 101.9 |       | 107.2 |       |
| 100816770 | Med15                       | 789  | 86.6  |                                                                                                                                                                                      |       | 96.3  |       | 91.5  |       | 112.3 |       | 111.3 |
| 110815851 | Art2b                       | 289  | 33.1  | metabolic pathways, Nicotinate and nicotinamide metabolism                                                                                                                           |       | 97.6  |       | 78.3  |       | 86.5  |       | 81.9  |
| 226958422 | Pacsin2                     | 486  | 55.8  |                                                                                                                                                                                      |       |       |       |       |       |       |       |       |
| 9625033   | Scamp4                      | 230  | 25.3  |                                                                                                                                                                                      | 99.7  | 103.3 | 98.7  | 95.3  | 100   | 95.7  | 99.9  | 96.9  |
| 169259772 | Tssc4                       | 317  | 33.5  |                                                                                                                                                                                      |       | 101.1 |       | 87.4  |       | 122.2 |       | 119.2 |
| 30794210  | Brpf1                       | 1246 | 140.7 |                                                                                                                                                                                      | 104.1 | 108   | 100.4 | 103.4 | 104.3 | 98.5  | 82.8  | 99.4  |
| 31982348  | Irf2bp1                     | 584  | 61.7  |                                                                                                                                                                                      | 100   | 94    | 99.4  | 107.3 | 99.6  | 104.7 | 105.8 | 111.7 |
| 6753448   | Tpp1                        | 562  | 61.3  | Lysosome                                                                                                                                                                             | 133.5 | 133.5 | 135.2 | 134.5 | 67.3  | 67.3  | 76.5  | 72.6  |
| 62543565  | Smarcad1                    | 1021 | 116.4 | Signaling pathways regulating pluripotency of stem cells                                                                                                                             | 99    | 68.1  | 83.9  | 97.2  | 129.2 | 236.3 | 95.7  | 90.5  |
| 471270254 | Tbxa2r                      | 341  | 37.1  | Platelet activation; Calcium signaling pathway; Neuroactive ligand-receptor interaction                                                                                              |       | 133.4 |       | 101.3 |       | 82.2  |       | 107.3 |
| 281183278 | Ccdc127                     | 260  | 30.5  |                                                                                                                                                                                      | 106.3 | 113.8 | 90.3  | 93.3  | 89.2  | 92.3  | 114.8 | 115.7 |
| 27369676  | Sepsecs                     | 504  | 55.3  | serine compound metabolism, Aminoacyl-tRNA biosynthesis                                                                                                                              | 88.7  | 89.6  | 106.4 | 106.8 | 118.6 | 112.8 | 102.9 | 100.5 |
| 31982437  | Nsdhl                       | 362  | 40.7  | Steroid biosynthesis; Metabolic pathways                                                                                                                                             | 78.8  |       | 75.6  |       | 119.3 |       | 113.4 |       |
| 13385054  | Ndufb3                      | 104  | 11.7  | Metabolic pathways; Huntington's disease; Non-alcoholic fatty liver disease (NAFLD); Oxidative phosphorylation; Parkinson's disease; Alzheimer's disease                             | 94.5  | 110.3 | 99.8  | 110.6 | 97.4  | 80.9  | 109.3 | 93.2  |
| 21313486  | Pr12b1                      | 228  | 25.9  |                                                                                                                                                                                      |       | 102.6 |       | 102.4 |       | 91.9  |       | 105.7 |
| 47059089  | Ccdc88c                     | 2009 | 226.4 |                                                                                                                                                                                      |       |       |       |       |       |       |       |       |
| 21313082  | Cmtm6                       | 183  | 19.8  |                                                                                                                                                                                      | 88.6  | 87.4  | 93.7  | 83.7  | 110.8 | 114.3 | 121.2 | 118.7 |
| 22095015  | Cers2; Lass2                | 380  | 45    | Metabolic pathways; Sphingolipid signaling pathway; Sphingolipid metabolism                                                                                                          | 79.1  | 86.8  | 85    | 87.1  | 136.9 | 137.8 | 110.4 | 116.2 |
| 213972641 | Rbm43                       | 343  | 38.6  |                                                                                                                                                                                      | 97.3  | 93.5  | 87.8  | 82.3  | 108.6 | 119.2 | 105.8 | 88.6  |
| 254588056 | Pmvk                        | 192  | 21.9  | Metabolic pathways; Terpenoid backbone biosynthesis; Peroxisome                                                                                                                      | 71.3  | 68.5  | 71.3  | 65.4  | 128.7 | 147.5 | 132   | 124   |
| 31560462  | Stx7                        | 261  | 29.7  | Phagosome; SNARE interactions in vesicular transport                                                                                                                                 | 126.7 | 130.8 | 122.9 | 111   | 109.6 | 102.5 | 92.7  | 93.4  |
| 281332195 | Mlf2                        | 247  | 28    |                                                                                                                                                                                      |       | 100.6 |       | 93    |       | 105.5 |       | 95    |
| 111185945 | Gpcpd1                      | 675  | 76.5  | Glycerophospholipid metabolism; Choline metabolism in cancer                                                                                                                         | 100.8 | 107.3 | 89.7  | 80.9  | 99.4  | 112.2 | 120.8 | 115.4 |
| 21313484  | Iscu                        | 168  | 18.1  |                                                                                                                                                                                      | 112.8 | 109.3 | 114.9 | 113.4 | 85.7  | 86.5  | 98.2  | 101.1 |
| 295789038 | 1810020D<br>17Rik;<br>Aamdc | 150  | 16.3  |                                                                                                                                                                                      | 125.7 | 118.1 | 107.5 | 107   | 91.6  | 86.1  | 89.1  | 89.2  |
| 19527392  | Brms1                       | 246  | 28.2  |                                                                                                                                                                                      |       |       |       |       |       |       |       |       |
| 110815826 | Robo2                       | 1508 | 165.3 | Axon guidance                                                                                                                                                                        | 110.4 | 94.8  | 128.5 | 108.4 | 83.3  | 89.1  | 109.6 | 125   |
| 15011889  | Osbpl5                      | 898  | 101.6 |                                                                                                                                                                                      | 102.5 |       | 96.3  |       | 111   |       | 93.8  |       |



|           |                    |      |       |                                                                                                                                                                                                                                                                   |       |       |       |       |       |       |       |       |
|-----------|--------------------|------|-------|-------------------------------------------------------------------------------------------------------------------------------------------------------------------------------------------------------------------------------------------------------------------|-------|-------|-------|-------|-------|-------|-------|-------|
| 254281222 | Htra2              | 458  | 49.3  | Apoptosis - multiple species, Parkinson's disease, Autophagy                                                                                                                                                                                                      |       | 121.6 |       | 116.5 |       | 85.2  |       | 93    |
| 228008310 | Ccdc101;<br>Sgf29  | 293  | 33.3  |                                                                                                                                                                                                                                                                   | 102.1 |       | 104.7 |       | 93.5  |       | 90.8  |       |
| 46877062  | Ftsj1              | 324  | 35.6  |                                                                                                                                                                                                                                                                   | 64.9  |       | 61.4  |       | 99.1  |       | 112.4 |       |
| 169234797 | Suv420h2;<br>Kmt5c | 468  | 53.1  | Lysine degradation                                                                                                                                                                                                                                                | 107.2 |       | 100.4 |       | 93.2  |       | 94    |       |
| 31542904  | Gosr1              | 250  | 28.5  | SNARE interactions in vesicular transport                                                                                                                                                                                                                         | 100.8 | 98.1  | 83.7  | 98.5  | 102.7 | 106   | 116   | 106.8 |
| 12963575  | Pbk                | 330  | 36.7  |                                                                                                                                                                                                                                                                   |       | 66.9  |       | 72.3  |       | 131.6 |       | 145.7 |
| 113680348 | Fscn1              | 493  | 54.5  |                                                                                                                                                                                                                                                                   | 103.9 |       | 60.6  |       | 100.4 |       | 87.6  |       |
| 6754274   | Icam2              | 277  | 31.4  | Cell adhesion molecules (CAMs); Natural killer cell mediated cytotoxicity                                                                                                                                                                                         | 85    |       | 96.4  |       | 102.5 |       | 100.3 |       |
| 68342032  | Tmem201            | 634  | 69.2  |                                                                                                                                                                                                                                                                   | 127.4 |       | 99.4  |       | 91.1  |       | 93.1  |       |
| 27734998  | Tmem11             | 190  | 21.3  |                                                                                                                                                                                                                                                                   |       | 109.3 |       | 93.5  |       | 99.4  |       | 111.2 |
| 226823250 | Mpo                | 718  | 81.1  | Phagosome; Transcriptional misregulation in cancer                                                                                                                                                                                                                | 193.4 | 174.1 | 170.6 | 156.2 | 72.2  | 81.2  | 69.7  | 74    |
| 124244100 | Adck4;<br>Cog8b    | 533  | 59.1  |                                                                                                                                                                                                                                                                   | 103.6 |       | 101.4 |       | 99    |       | 116.5 |       |
| 334688831 | Gon4l              | 2259 | 248.5 |                                                                                                                                                                                                                                                                   | 101.5 | 103.4 | 93.5  | 112   | 95.1  | 96.9  | 116.1 | 106.3 |
| 109809747 | Golga7             | 137  | 15.8  |                                                                                                                                                                                                                                                                   | 93.3  |       | 100.9 |       | 94.7  |       | 115.8 |       |
| 70906460  | Ccn1l              | 532  | 60.1  |                                                                                                                                                                                                                                                                   | 91.5  | 100.5 | 100.7 | 94.6  | 89    | 100.2 | 101.1 | 93.1  |
| 33563242  | Alox5ap            | 161  | 18.1  | Fc epsilon RI signaling pathway                                                                                                                                                                                                                                   | 141.2 | 131.9 | 99.8  | 77.5  | 83.6  | 82.5  | 79.3  | 84.6  |
| 19111154  | Asb6               | 418  | 46.2  |                                                                                                                                                                                                                                                                   | 108   | 89.1  | 90.6  | 92.2  | 111.3 | 110.9 | 106.8 | 131.2 |
| 38348246  | Traf6              | 530  | 60    | Endocytosis; Herpes simplex infection; Chagas disease (American trypanosomiasis); MAPK signaling pathway; Ubiquitin mediated proteolysis; NOD-like receptor signaling pathway; Toxoplasmosis; Epstein-Barr virus infection; RIG-I-like receptor signaling pathway | 88.3  | 91.7  | 87    | 89.5  | 113.4 | 122.5 | 106.8 | 99.3  |
| 6806915   | Ggps1              | 300  | 34.7  | Metabolic pathways; Terpenoid backbone biosynthesis                                                                                                                                                                                                               |       | 97.2  |       | 107.4 |       | 93.4  |       | 101.1 |
| 87239990  | Ivns1abp           | 642  | 71.5  | Influenza A                                                                                                                                                                                                                                                       |       |       |       |       |       |       |       |       |
| 6681137   | Dbi                | 87   | 10    | PPAR signaling pathway                                                                                                                                                                                                                                            | 126   |       | 113   |       | 79.3  |       | 104   |       |
| 30089677  | Hspa13             | 471  | 51.7  |                                                                                                                                                                                                                                                                   | 88.5  |       | 91.4  |       | 143.3 |       | 103.9 |       |
| 121674807 | Cnot6l             | 555  | 63    | RNA degradation                                                                                                                                                                                                                                                   | 93.4  | 98    | 82.1  | 77.4  | 106.7 | 86.1  | 111.1 | 98.6  |
| 294997230 | H2-Ab1             | 265  | 30.1  | Herpes simplex infection; Staphylococcus aureus infection; Rheumatoid arthritis; Allograft rejection; Toxoplasmosis; Tuberculosis; Cell adhesion molecules (CAMs); HTLV-I infection; Intestinal immune network for IgA production; Inflammatory bowel disease (   | 140   | 129.2 | 119.8 | 115.5 | 42.2  | 51.4  | 39.7  | 50.6  |
| 33859558  | Rabac1             | 185  | 20.6  |                                                                                                                                                                                                                                                                   | 94.7  | 93.7  | 93    | 88.7  | 112.7 | 121   | 101.1 | 105.9 |
| 31088896  | Aftph              | 904  | 98.4  |                                                                                                                                                                                                                                                                   |       | 102.6 |       | 109.7 |       | 89.3  |       | 103.3 |
| 300795920 | Lanc1l             | 399  | 45.3  |                                                                                                                                                                                                                                                                   | 104.8 | 132.2 | 123.7 | 128.4 | 86.1  | 73.9  | 85.6  | 86.8  |
| 225543405 | Cenpj              | 1344 | 153   |                                                                                                                                                                                                                                                                   | 103   | 107.3 | 98.7  | 96.3  | 94.8  | 102.4 | 117.3 | 125.5 |
| 6679389   | Plxna1             | 1894 | 211   | Axon guidance                                                                                                                                                                                                                                                     | 90.2  | 94.8  | 103.4 | 95.6  | 115.6 | 104.5 | 119   | 117.4 |
| 172072663 | Rpp40              | 363  | 41.5  | Ribosome biogenesis in eukaryotes; RNA transport                                                                                                                                                                                                                  | 103.7 |       | 102   |       | 88.8  |       | 98.4  |       |

|           |                              |      |       |                                                                                                                                                                                                                                                                 |       |       |       |       |       |       |       |       |
|-----------|------------------------------|------|-------|-----------------------------------------------------------------------------------------------------------------------------------------------------------------------------------------------------------------------------------------------------------------|-------|-------|-------|-------|-------|-------|-------|-------|
| 145208006 | Stra13;<br>Cenpx             | 78   | 8.9   | Fanconi anemia pathway                                                                                                                                                                                                                                          | 79.2  |       | 67.3  |       | 135   |       | 110.5 |       |
| 13324686  | Tomm20                       | 145  | 16.3  |                                                                                                                                                                                                                                                                 | 99.4  | 85.9  | 81.2  | 88.6  | 101.6 | 105.1 | 100.9 | 104.9 |
| 58037285  | Supt7l                       | 412  | 45.9  |                                                                                                                                                                                                                                                                 | 101.9 |       | 96.3  |       | 107.3 |       | 102.6 |       |
| 8567404   | Slc9a1                       | 820  | 91.4  | Regulation of actin cytoskeleton; Pancreatic secretion; Proteoglycans in cancer; Thyroid hormone signaling pathway; Bile secretion; Salivary secretion; Cardiac muscle contraction; cAMP signaling pathway; Gastric acid secretion; Adrenergic signaling in car |       |       |       |       |       |       |       |       |
| 46411182  | Mbnl1                        | 381  | 40.9  |                                                                                                                                                                                                                                                                 |       | 94.8  |       | 103.3 |       | 89.9  |       | 97.2  |
| 31542087  | Vezt                         | 780  | 87.9  |                                                                                                                                                                                                                                                                 | 87.2  |       | 86.8  |       | 116.1 |       | 109   |       |
| 334848200 | Ammecr1l                     | 384  | 42.8  |                                                                                                                                                                                                                                                                 | 106.5 | 103.6 | 95.6  | 96.9  | 103.7 | 117.4 | 104.8 | 97.7  |
| 161484638 | Comt                         | 265  | 29.5  | Steroid hormone biosynthesis; Dopaminergic synapse; Metabolic pathways; Tyrosine metabolism                                                                                                                                                                     | 100.7 | 93.2  | 90.8  | 88.9  | 114.2 | 137.8 | 105.3 | 108   |
| 109150414 | Pex10                        | 324  | 37.1  | Peroxisome                                                                                                                                                                                                                                                      |       |       |       |       |       |       |       |       |
| 37537546  | Hsh2d                        | 334  | 37.2  |                                                                                                                                                                                                                                                                 |       |       |       |       |       |       |       |       |
| 225543323 | Gse1                         | 1223 | 137.3 |                                                                                                                                                                                                                                                                 |       | 103.6 |       | 93.4  |       | 89.5  |       | 116.2 |
| 29336062  | Topors                       | 1033 | 117   |                                                                                                                                                                                                                                                                 | 122.9 | 115.3 | 93.7  | 95.8  | 117.2 | 87    | 97.7  | 88.3  |
| 9790227   | Rab9                         | 201  | 22.9  | Measles                                                                                                                                                                                                                                                         | 96.6  | 101.5 | 94.9  | 98.9  | 99.8  | 110   | 106.4 | 110.7 |
| 21313432  | Psmg3                        | 122  | 13.3  |                                                                                                                                                                                                                                                                 | 62.7  |       | 77.1  |       | 114.4 |       | 117.6 |       |
| 88501749  | Triobp                       | 2014 | 223.2 |                                                                                                                                                                                                                                                                 | 121   | 124.8 | 89.1  | 91.5  | 120.8 | 114.3 | 80.8  | 108.1 |
| 13384754  | Cox7b                        | 80   | 9     | Metabolic pathways; Huntington's disease; Non-alcoholic fatty liver disease (NAFLD); Oxidative phosphorylation; Parkinson's disease; Alzheimer's disease; Cardiac muscle contraction                                                                            | 106.4 | 112.2 | 116.6 | 122   | 90.3  | 86.6  | 58.6  | 55.9  |
| 255958183 | Tsen34                       | 316  | 34.2  |                                                                                                                                                                                                                                                                 |       | 95.7  |       | 100   |       | 117.2 |       | 99.3  |
| 13385428  | Riok2                        | 547  | 62.5  | Ribosome biogenesis in eukaryotes                                                                                                                                                                                                                               | 112.9 | 102.7 | 110.4 | 104.1 | 103.6 | 94.1  | 106.8 | 106.1 |
| 13384772  | Pop4                         | 221  | 25.6  | Ribosome biogenesis in eukaryotes; RNA transport                                                                                                                                                                                                                | 84.1  |       | 103.6 |       | 114   |       | 112.6 |       |
| 31088894  | Gtf2h3                       | 309  | 34.2  | Basal transcription factors; Nucleotide excision repair; Viral carcinogenesis                                                                                                                                                                                   | 97.4  | 110.9 | 95.4  | 101.6 | 103.5 | 92.6  | 109   | 95.6  |
| 111119010 | Vimp;<br>Selenos             | 190  | 21.5  | Protein processing in endoplasmic reticulum                                                                                                                                                                                                                     | 111.2 | 108.8 | 104.9 | 101.2 | 82.6  | 82.5  | 83    | 86.5  |
| 28202023  | Crbn                         | 445  | 50.8  |                                                                                                                                                                                                                                                                 |       | 93.3  |       | 83.4  |       | 92.2  |       | 125   |
| 13384818  | Nenf                         | 171  | 18.9  |                                                                                                                                                                                                                                                                 | 78.8  |       | 77.9  |       | 131.8 |       | 145.8 |       |
| 160358866 | Ppm1h                        | 513  | 56.3  |                                                                                                                                                                                                                                                                 | 107.2 | 103.9 | 105.1 | 101.9 | 95.3  | 96    | 94.5  | 99.2  |
| 72384371  | 2510003E<br>04Rik;<br>Kif1bp | 617  | 71    |                                                                                                                                                                                                                                                                 | 104.3 | 104.3 | 104.9 | 111.9 | 107.6 | 113.4 | 130.3 | 118.9 |
| 312283736 | Ghitm                        | 346  | 37.3  |                                                                                                                                                                                                                                                                 | 74    | 82.7  | 76.4  | 75.5  | 100   | 118.7 | 120.8 | 131.6 |
| 23346509  | Ctdspl                       | 261  | 29.2  |                                                                                                                                                                                                                                                                 | 125.2 | 123.8 | 91.7  | 91.8  | 97.3  | 94.8  | 95.8  | 101.6 |
| 158749547 | Stxbp5                       | 1116 | 123.5 |                                                                                                                                                                                                                                                                 | 109.3 | 103   | 107.7 | 107.7 | 96    | 106.7 | 101.3 | 92.4  |
| 157823950 | Zfp318                       | 2237 | 246.2 |                                                                                                                                                                                                                                                                 | 107.2 | 105.5 | 97.7  | 92.2  | 98.3  | 100.3 | 98    | 112.8 |

|           |                               |      |       |                                                                                                                                                                                                 |       |       |       |       |       |       |       |       |
|-----------|-------------------------------|------|-------|-------------------------------------------------------------------------------------------------------------------------------------------------------------------------------------------------|-------|-------|-------|-------|-------|-------|-------|-------|
| 254553274 | Zfp746                        | 652  | 69.8  |                                                                                                                                                                                                 | 89.5  | 97.1  | 75.8  | 75.6  | 108.2 | 94.3  | 91.3  | 101   |
| 85540473  | Morf4l1                       | 362  | 41.5  |                                                                                                                                                                                                 |       | 102.7 |       | 94.4  |       | 97.9  |       | 107.6 |
| 262231748 | Taf3                          | 932  | 105   | Herpes simplex infection; Basal transcription factors                                                                                                                                           |       |       |       |       |       |       |       |       |
| 28849879  | Ppcdc                         | 204  | 22.3  | Metabolic pathways; Pantothenate and CoA biosynthesis                                                                                                                                           | 117.4 |       | 101.5 |       | 113.9 |       | 80.7  |       |
| 27229101  | 5730469<br>M10Rik;<br>Fam213a | 218  | 24.4  |                                                                                                                                                                                                 | 101.9 | 110.3 | 119.4 | 113.9 | 82.9  | 92.8  | 92.1  | 86.9  |
| 226958669 | Fem1a                         | 654  | 72    |                                                                                                                                                                                                 | 123.6 | 142.6 | 90.9  | 100.2 | 101.5 | 130.9 | 106.1 | 88.2  |
| 11612505  | Sdf2l1                        | 221  | 23.6  |                                                                                                                                                                                                 | 73.8  |       | 84.9  |       | 123.3 |       | 139.4 |       |
| 240120089 | Kdm4a                         | 1064 | 120.3 |                                                                                                                                                                                                 | 97.7  |       | 86.5  |       | 131.7 |       | 116.2 |       |
| 27369822  | Fam161b                       | 589  | 66.9  |                                                                                                                                                                                                 | 89    |       | 120.3 |       | 91.3  |       | 91.9  |       |
| 62899073  | S100pbp                       | 396  | 44.4  |                                                                                                                                                                                                 |       | 99.3  |       | 92    |       | 98.5  |       | 109.1 |
| 169646700 | Zcchc7                        | 541  | 63    | RNA degradation                                                                                                                                                                                 |       |       |       |       |       |       |       |       |
| 227498248 | Uck1                          | 283  | 31.6  | Metabolic pathways; Pyrimidine metabolism; Drug metabolism - other enzymes                                                                                                                      |       | 93.8  |       | 106.6 |       | 98.1  |       | 102   |
| 9506985   | Ppt2                          | 302  | 34.3  | Fatty acid metabolism; Metabolic pathways; Lysosome; Fatty acid elongation                                                                                                                      | 134   |       | 115.5 |       | 93.4  |       | 84    |       |
| 227498961 | Cd3d                          | 173  | 19    | Chagas disease (American trypanosomiasis); T cell receptor signaling pathway; Primary immunodeficiency; HTLV-I infection; Hematopoietic cell lineage; Th1 and Th2 cell differentiation; Measles | 88.2  | 89.6  | 118.8 | 115.8 | 124   | 121.8 | 94    | 99.3  |
| 188219539 | Zfp263                        | 680  | 77.5  |                                                                                                                                                                                                 | 100.4 | 106.3 | 88.3  | 78.1  | 109.1 | 111.3 | 105.9 | 99.9  |
| 359718964 | Dmxl1                         | 3013 | 335.8 |                                                                                                                                                                                                 | 91.8  | 99.7  | 100.6 | 103.7 | 100.5 | 89.8  | 123.7 | 121.6 |
| 225543398 | Gtf2h2                        | 396  | 44.7  | Basal transcription factors; Nucleotide excision repair; Viral carcinogenesis                                                                                                                   |       |       |       |       |       |       |       |       |
| 255683297 | Elmo3                         | 720  | 81.7  | Bacterial invasion of epithelial cells                                                                                                                                                          | 105.2 | 103.1 | 109.6 | 111.2 | 85.8  | 90.2  | 92.4  | 102.3 |
| 254692828 | Pxk                           | 582  | 65.2  |                                                                                                                                                                                                 | 87.2  |       | 104   |       | 128.4 |       | 98.7  |       |
| 33859660  | Ppp2r5e                       | 467  | 54.7  | mRNA surveillance pathway; Dopaminergic synapse; Oocyte meiosis; Sphingolipid signaling pathway; PI3K-Akt signaling pathway; AMPK signaling pathway; Adrenergic signaling in cardiomyocytes     | 101.5 |       | 103.9 |       | 106.4 |       | 91.6  |       |
| 256665259 | Fbxo4                         | 385  | 43.7  | Ubiquitin mediated proteolysis                                                                                                                                                                  |       |       |       |       |       |       |       |       |
| 58037257  | Dcaf7                         | 342  | 38.9  |                                                                                                                                                                                                 | 101.8 | 98.1  | 100.6 | 99.1  | 98.2  | 102.8 | 96.5  | 97.5  |
| 28076969  | Pgm2l1                        | 621  | 70.2  | Starch and sucrose metabolism                                                                                                                                                                   | 106.4 | 110.2 | 118.4 | 110   | 97.4  | 96.2  | 89.8  | 93.8  |
| 13385808  | Mrpl18                        | 180  | 20.7  | Ribosome                                                                                                                                                                                        | 92.9  | 94.7  | 90.4  | 91.1  | 113   | 116.2 | 116.6 | 119.2 |
| 23943838  | Slc25a1                       | 311  | 33.9  |                                                                                                                                                                                                 | 102.4 | 97.5  | 96.1  | 95.5  | 97.6  | 100.1 | 92.2  | 84.5  |
| 148222456 | Tchp                          | 497  | 60.6  |                                                                                                                                                                                                 | 103.3 |       | 98.9  |       | 88.1  |       | 92.3  |       |
| 84872229  | Ccdc23;<br>Svbp               | 102  | 12    |                                                                                                                                                                                                 | 100.8 | 94.6  | 93.4  | 95.2  | 80.3  | 76    | 101.6 | 88.1  |
| 334848155 | Fam105a                       | 353  | 41.5  |                                                                                                                                                                                                 | 106.7 | 111.8 | 103.7 | 96.6  | 87.8  | 87.4  | 90.5  | 89.6  |
| 244793488 | Mfn1                          | 741  | 83.7  | NOD-like receptor signaling pathway                                                                                                                                                             | 107.4 |       | 81.7  |       | 96.1  |       | 110.3 |       |
| 52486843  | Tacc2                         | 2879 | 305   |                                                                                                                                                                                                 | 72.6  | 80.6  | 66.2  | 70.4  | 130.2 | 119.9 | 137.5 | 154.6 |

|           |                             |      |       |                                                                                                                                                          |       |       |       |       |       |       |       |       |
|-----------|-----------------------------|------|-------|----------------------------------------------------------------------------------------------------------------------------------------------------------|-------|-------|-------|-------|-------|-------|-------|-------|
| 16716595  | Impa2                       | 290  | 31.7  | Metabolic pathways; Inositol phosphate metabolism; Phosphatidylinositol signaling system                                                                 | 98    | 91.9  | 96.5  | 100.3 | 108.1 | 115.6 | 107   | 103.1 |
| 251823980 | Pcx                         | 1179 | 129.7 | Pyruvate metabolism; Citrate cycle (TCA cycle); Metabolic pathways; Biosynthesis of amino acids; Carbon metabolism                                       | 76.4  | 75.5  | 143.4 | 133.9 | 89.6  | 92.9  | 93.2  | 97.3  |
| 134053865 | Trpv2                       | 756  | 85.9  | NOD-like receptor signaling pathway; Inflammatory mediator regulation of TRP channels                                                                    |       | 95.7  |       | 96    |       | 90.4  |       | 96.5  |
| 124378022 | Cdc27                       | 825  | 91.8  | Progesterone-mediated oocyte maturation; Ubiquitin mediated proteolysis; HTLV-I infection; Oocyte meiosis;                                               | 94.7  | 98.7  | 86.4  | 92.5  | 111.2 | 115.9 | 115.8 | 112.8 |
| 18859597  | Ndufc2;<br>LOC1026<br>41347 | 120  | 14.2  | Metabolic pathways; Huntington's disease; Non-alcoholic fatty liver disease (NAFLD); Oxidative phosphorylation; Parkinson's disease; Alzheimer's disease | 108.4 | 109.7 | 100.1 | 103.9 | 98.8  | 104.1 | 86.8  | 67.6  |
| 70887769  | Mtf2                        | 593  | 66.9  |                                                                                                                                                          |       | 86.1  |       | 81.1  |       | 115.4 |       | 80.4  |
| 31559922  | Cnst                        | 711  | 76.8  |                                                                                                                                                          | 111.6 |       | 98.2  |       | 89.5  |       | 85.7  |       |
| 255683439 | Rpap1                       | 1409 | 155.2 |                                                                                                                                                          | 95.8  | 96.2  | 98.8  | 90.5  | 97.3  | 120   | 108.9 | 102.4 |
| 148540023 | Slc9a9                      | 644  | 72.1  |                                                                                                                                                          | 139.3 |       | 111.1 |       | 81.5  |       | 86    |       |
| 227430340 | Kif2c                       | 721  | 81    |                                                                                                                                                          | 89.3  |       | 104.3 |       | 97.7  |       | 142.7 |       |
| 254540171 | Nupl2                       | 420  | 44.3  | RNA transport                                                                                                                                            | 99.3  | 101.5 | 90.5  | 90.4  | 118.8 | 104.3 | 93.7  | 93.4  |
| 113205067 | Zfx                         | 799  | 90    |                                                                                                                                                          | 84.5  | 96.1  | 95.3  | 98.3  | 105.1 | 118.4 | 104.6 | 113.2 |
| 227499238 | Hagh                        | 309  | 34.1  | Pyruvate metabolism                                                                                                                                      | 123.6 | 127.4 | 128.8 | 130.9 | 86.7  | 81.2  | 83.8  | 82    |
| 227908787 | 1110008L<br>16Rik           | 584  | 66.8  |                                                                                                                                                          |       |       |       |       |       |       |       |       |
| 30425298  | E330009J<br>07Rik           | 391  | 44.2  |                                                                                                                                                          |       |       |       |       |       |       |       |       |
| 31559945  | Rabepk                      | 380  | 41.1  |                                                                                                                                                          | 100.2 |       | 98.1  |       | 109.8 |       | 90.9  |       |
| 225007607 | Tmem167                     | 72   | 8.1   |                                                                                                                                                          | 98.4  | 97.7  | 109.8 | 104.2 | 96.3  | 107.7 | 107.9 | 115.1 |
| 171460960 | Abhd14b                     | 210  | 22.4  |                                                                                                                                                          | 196.6 | 181.1 | 108.3 | 100   | 70.6  | 61.5  | 61.5  | 63.4  |
| 255522851 | Phf10                       | 497  | 55.8  |                                                                                                                                                          |       | 104.1 |       | 85    |       | 103.7 |       | 104.9 |
| 20070410  | Med10                       | 135  | 15.7  |                                                                                                                                                          |       | 95    |       | 91.4  |       | 115.4 |       | 102.3 |
| 320089590 | Atp9b                       | 1146 | 129   |                                                                                                                                                          | 99.9  |       | 108.5 |       | 112.1 |       | 77.5  |       |
| 17647117  | Abcb6                       | 842  | 93.7  | ABC transporters                                                                                                                                         | 89.7  | 84.2  | 93.3  | 89.9  | 133.4 | 114.5 | 114.8 | 108.4 |
| 117168271 | Dicer1                      | 1906 | 215.6 | MicroRNAs in cancer                                                                                                                                      | 104.3 | 105.6 | 95.2  | 87.4  | 105.7 | 108.6 | 106.4 | 118.4 |
| 74136555  | Atg4a                       | 396  | 45.1  | Autophagy                                                                                                                                                | 99.1  |       | 88.8  |       | 113.9 |       | 100.4 |       |
| 6679591   | Rab24                       | 203  | 23.1  |                                                                                                                                                          |       |       |       |       |       |       |       |       |
| 242117941 | N4bp1                       | 893  | 99.1  |                                                                                                                                                          | 93.2  | 94    | 90.5  | 89.5  | 109.7 | 111.9 | 127.5 | 127.3 |
| 161333845 | Xaf1                        | 273  | 31.1  |                                                                                                                                                          | 105.9 | 107.2 | 130.8 | 138.9 | 82.8  | 87.9  | 87.5  | 77.6  |
| 85986575  | Usp30                       | 517  | 58.2  |                                                                                                                                                          | 116.2 |       | 96.4  |       | 106.8 |       | 94.9  |       |
| 19527008  | Pla2g15                     | 412  | 47.3  | Lysosome; Glycerophospholipid metabolism                                                                                                                 | 151.9 | 116.8 | 130.7 | 121.5 | 93.1  | 91.1  | 85.4  | 95.4  |
| 74959788  | Upf3b                       | 472  | 57    | mRNA surveillance pathway; RNA transport                                                                                                                 | 100.4 | 87    | 87.3  | 94.6  | 110.8 | 119   | 118   | 113.8 |
| 225579041 | BC017158                    | 466  | 50.5  |                                                                                                                                                          |       |       |       |       |       |       |       |       |
| 13384894  | Mrps14                      | 128  | 14.9  | Ribosome                                                                                                                                                 | 112.6 | 107.6 | 92.2  | 86.7  | 101.1 | 120.2 | 90.2  | 104.7 |
| 13385922  | Naa20                       | 188  | 21.5  |                                                                                                                                                          | 90    | 96.9  | 84.4  | 89.6  | 105   | 108.6 | 112.1 | 113.5 |

|           |                             |      |       |                                                                                                                                                                                                                                                                 |       |       |       |       |       |       |       |       |
|-----------|-----------------------------|------|-------|-----------------------------------------------------------------------------------------------------------------------------------------------------------------------------------------------------------------------------------------------------------------|-------|-------|-------|-------|-------|-------|-------|-------|
| 47059078  | Zfp191;<br>Zfp24            | 368  | 41.9  |                                                                                                                                                                                                                                                                 | 121.1 |       | 108.9 |       | 106.1 |       | 83.4  |       |
| 312596936 | Ascc1                       | 356  | 41.3  |                                                                                                                                                                                                                                                                 | 109.2 | 103.7 | 102.5 | 93.8  | 146.1 | 141.7 | 65    | 81    |
| 33468929  | Vamp7                       | 220  | 25    | SNARE interactions in vesicular transport                                                                                                                                                                                                                       | 110.9 | 105.1 | 114.4 | 108.7 | 104.6 | 104.8 | 100.3 | 107.9 |
| 7305305   | Ndrp2                       | 371  | 40.8  |                                                                                                                                                                                                                                                                 | 97.5  | 102.8 | 99.8  | 93.2  | 94.8  | 110   | 108.6 | 108.9 |
| 57222272  | Slc7a6os                    | 306  | 35    |                                                                                                                                                                                                                                                                 |       | 115.4 |       | 97.1  |       | 108.7 |       | 116.9 |
| 27229225  | Arl5b                       | 180  | 20.5  |                                                                                                                                                                                                                                                                 | 81.5  |       | 93.7  |       | 107.5 |       | 115.9 |       |
| 84370019  | Heca                        | 544  | 59.1  |                                                                                                                                                                                                                                                                 | 110   |       | 110.6 |       | 87.9  |       | 102   |       |
| 6679184   | Otc                         | 354  | 39.7  | Metabolic pathways; Biosynthesis of amino acids; Arginine biosynthesis                                                                                                                                                                                          | 107.7 | 102.7 | 107.2 | 106.1 | 91.7  | 91.9  | 90.7  | 94    |
| 254281227 | Arl6ip6                     | 226  | 24.9  |                                                                                                                                                                                                                                                                 | 97.7  | 104   | 98.7  | 105.9 | 111.9 | 102.3 | 64.6  | 88.7  |
| 31982171  | Mug1                        | 1476 | 165.2 |                                                                                                                                                                                                                                                                 | 191.9 | 205.5 | 194.6 | 199.1 | 66.3  | 66.5  | 66.6  | 63    |
| 6755446   | Sdf4                        | 361  | 42    |                                                                                                                                                                                                                                                                 | 108.9 |       | 90.7  |       | 147.6 |       | 60.5  |       |
| 13385944  | Rgs19                       | 216  | 24.7  |                                                                                                                                                                                                                                                                 | 135.3 | 136.7 | 122.9 | 124.8 | 89.6  | 91    | 91.7  | 101.1 |
| 29243988  | Cdc34                       | 235  | 26.6  | Herpes simplex infection; Ubiquitin mediated proteolysis                                                                                                                                                                                                        | 105.1 |       | 81.4  |       | 101.7 |       | 114.4 |       |
| 21313128  | Timm21                      | 244  | 27.9  |                                                                                                                                                                                                                                                                 | 97.8  |       | 102   |       | 119.5 |       | 83.4  |       |
| 6754090   | Gsto1                       | 240  | 27.5  | Glutathione metabolism; Platinum drug resistance; Drug metabolism - cytochrome P450; Chemical carcinogenesis; Metabolism of xenobiotics by cytochrome P450                                                                                                      | 128.1 | 110   | 88    | 92.2  | 88.8  | 100.7 | 103.3 | 100.1 |
| 78190502  | Golm1                       | 393  | 44.3  |                                                                                                                                                                                                                                                                 | 120.6 | 117.3 | 95.6  | 102.8 | 92.3  | 98.9  | 118.4 | 105.2 |
| 254028217 | Adek3;<br>Cog8a             | 645  | 71.7  |                                                                                                                                                                                                                                                                 | 139.8 | 126.6 | 97.4  | 96.3  | 82.5  | 96.1  | 90.9  | 92.1  |
| 124486668 | Kans11                      | 1036 | 113.1 |                                                                                                                                                                                                                                                                 | 90.5  | 100.7 | 77.9  | 89.6  | 87.5  | 92.3  | 102.6 | 105.6 |
| 254540080 | Pik3ca                      | 1068 | 124.3 | Oxytocin signaling pathway; ErbB signaling pathway; FoxO signaling pathway; Leukocyte transendothelial migration; Acute myeloid leukemia; AGE-RAGE signaling pathway in diabetic complications; mTOR signaling pathway; Cholinergic synapse; Platinum drug resi | 89.8  | 80.8  | 106.2 | 112.9 | 118.7 | 124.6 | 108.4 | 114.6 |
| 294460010 | 1700016<br>M24Rik;<br>Mroh4 | 983  | 112.7 |                                                                                                                                                                                                                                                                 | 108.3 |       | 98.8  |       | 136.9 |       | 150.8 |       |
| 30352008  | Ccdc104;<br>Cfap36          | 343  | 39.6  |                                                                                                                                                                                                                                                                 | 92.5  | 90.3  | 128.4 | 101.3 | 85.7  | 101.5 | 103   | 98.4  |
| 170172526 | Idua                        | 643  | 72.2  | Metabolic pathways; Lysosome; Glycosaminoglycan degradation                                                                                                                                                                                                     | 135.7 |       | 111.9 |       | 78.2  |       | 76.2  |       |
| 244790106 | Spast                       | 614  | 66.4  |                                                                                                                                                                                                                                                                 |       |       |       |       |       |       |       |       |
| 124249115 | Churc1                      | 112  | 12.8  |                                                                                                                                                                                                                                                                 | 97.8  | 100.3 | 81.2  | 85.3  | 110.8 | 103.6 | 121.4 | 114   |
| 226423915 | Hps3                        | 1002 | 113.1 |                                                                                                                                                                                                                                                                 | 92.7  |       | 84.6  |       | 109.9 |       | 122.5 |       |
| 213385308 | Calcr1                      | 463  | 53.2  | Vascular smooth muscle contraction; Neuroactive ligand-receptor interaction                                                                                                                                                                                     | 99.3  | 83.1  | 99.3  | 94.8  | 80.8  | 73.7  | 83.9  | 80.9  |
| 39979630  | Tbpl2                       | 350  | 38.9  | Herpes simplex infection; Basal transcription factors; Epstein-Barr virus infection; HTLV-I infection; Huntington's disease; Viral carcinogenesis                                                                                                               | 105.3 | 110.6 | 98.7  | 98    | 97.3  | 94.4  | 104.3 | 94.7  |

|           |                                                      |      |       |                                                                                                                                                                                                                 |       |       |       |       |       |       |       |       |
|-----------|------------------------------------------------------|------|-------|-----------------------------------------------------------------------------------------------------------------------------------------------------------------------------------------------------------------|-------|-------|-------|-------|-------|-------|-------|-------|
| 30520301  | Agpat6;<br>Gpat4                                     | 456  | 52.1  | Metabolic pathways; Glycerophospholipid metabolism;<br>Glycerolipid metabolism                                                                                                                                  |       | 100.7 |       | 104   |       | 105.9 |       | 103.1 |
| 254675328 | Bloc1s2;<br>Bloc1s2a;<br>Bloc1s2-<br>ps;<br>Bloc1s2b | 143  | 16.3  |                                                                                                                                                                                                                 | 91.3  |       | 98.8  |       | 108.8 |       | 116.3 |       |
| 21311825  | 2310057<br>M21Rik                                    | 444  | 48.7  |                                                                                                                                                                                                                 |       |       |       |       |       |       |       |       |
| 213512915 | Uqcc;<br>Uqcc1                                       | 295  | 34.3  |                                                                                                                                                                                                                 | 90.3  |       | 87.2  |       | 127.2 |       | 85    |       |
| 48526512  | Mrps15                                               | 258  | 29.4  | Ribosome                                                                                                                                                                                                        |       |       |       |       |       |       |       |       |
| 115292450 | 4933433P<br>14Rik;<br>Gskin                          | 144  | 16.2  |                                                                                                                                                                                                                 | 112.4 | 106   | 95.2  | 112.6 | 97.2  | 82.5  | 108.1 | 114.1 |
| 50582545  | Smg6                                                 | 1418 | 160.4 | mRNA surveillance pathway                                                                                                                                                                                       | 112.4 |       | 90.4  |       | 109.1 |       | 114.2 |       |
| 238231386 | Ube2b                                                | 152  | 17.3  | Ubiquitin mediated proteolysis                                                                                                                                                                                  | 96.6  | 94.6  | 81.9  | 90.2  | 114.4 | 112.8 | 103.9 | 102.6 |
| 75677514  | Tmem181<br>a                                         | 474  | 54.9  |                                                                                                                                                                                                                 | 85.6  |       | 81.6  |       | 113.3 |       | 138.6 |       |
| 31980729  | Rasal1                                               | 799  | 89.3  | Ras signaling pathway                                                                                                                                                                                           |       |       |       |       |       |       |       |       |
| 50657347  | Cdk5rap2                                             | 1822 | 205.8 |                                                                                                                                                                                                                 | 111.3 |       | 100.7 |       | 101.3 |       | 86.1  |       |
| 38348456  | Ska3                                                 | 411  | 45.3  |                                                                                                                                                                                                                 |       |       |       |       |       |       |       |       |
| 258547104 | Syvn1                                                | 612  | 67.3  | Ubiquitin mediated proteolysis; Protein processing in<br>endoplasmic reticulum                                                                                                                                  | 91.4  | 93.3  | 87    | 95.7  | 103.6 | 106.5 | 85.1  | 79.3  |
| 164519048 | Fam105b;<br>Otulin                                   | 352  | 40.3  |                                                                                                                                                                                                                 |       | 106.8 |       | 99.1  |       | 97.8  |       | 95.9  |
| 13385440  | Cdc3711                                              | 335  | 38.4  |                                                                                                                                                                                                                 | 109.7 |       | 94.5  |       | 103.4 |       | 110   |       |
| 254540134 | Myeov2;<br>Cops9                                     | 57   | 6.2   |                                                                                                                                                                                                                 |       |       |       |       |       |       |       |       |
| 46358380  | Zfp646                                               | 1788 | 196.7 |                                                                                                                                                                                                                 |       |       |       |       |       |       |       |       |
| 109948295 | Fam133b                                              | 245  | 27.9  |                                                                                                                                                                                                                 | 105.4 | 100   | 99.7  | 94.3  | 92.7  | 88.5  | 113.6 | 118.2 |
| 124249333 | Dcaf15                                               | 638  | 70.7  |                                                                                                                                                                                                                 | 88    | 89.1  | 95.2  | 95    | 106   | 102.5 | 99.8  | 93.9  |
| 110625765 | 5730455P<br>16Rik                                    | 393  | 44.4  |                                                                                                                                                                                                                 |       |       |       |       |       |       |       |       |
| 13385050  | Mrpl51                                               | 128  | 15.1  |                                                                                                                                                                                                                 | 94.6  | 95    | 98.3  | 95.4  | 113.7 | 111.4 | 107.4 | 113.3 |
| 27229147  | Zfp654                                               | 571  | 65.1  |                                                                                                                                                                                                                 | 98.8  |       | 92.4  |       | 106   |       | 104.2 |       |
| 194440693 | Maml2                                                | 1170 | 126.9 | Notch signaling pathway; Th1 and Th2 cell differentiation                                                                                                                                                       | 124.5 |       | 106.7 |       | 107.2 |       | 75.5  |       |
| 24025656  | Dennd1c                                              | 786  | 86.6  |                                                                                                                                                                                                                 | 111.7 | 113.6 | 119.4 | 111.7 | 82.4  | 87.3  | 86.7  | 85.4  |
| 161702988 | Apob                                                 | 4505 | 509.1 | vitamin digestion and absorption; Fat digestion and<br>absorption                                                                                                                                               | 119   |       | 124.7 |       | 95.3  |       | 94    |       |
| 228008307 | Sdhc                                                 | 169  | 18.4  | Citrate cycle (TCA cycle); Metabolic pathways;<br>Huntington's disease; Non-alcoholic fatty liver disease<br>(NAFLD); Oxidative phosphorylation; Parkinson's disease;<br>Alzheimer's disease; Carbon metabolism | 103.4 | 97.8  | 107.5 | 104.2 | 97.1  | 95.1  | 73.5  | 75.2  |

|           |                            |      |       |                                                                                                     |       |       |       |       |       |       |       |       |
|-----------|----------------------------|------|-------|-----------------------------------------------------------------------------------------------------|-------|-------|-------|-------|-------|-------|-------|-------|
| 255683453 | AA960436; Usl1             | 267  | 30.2  |                                                                                                     | 112.3 |       | 115.6 |       | 89.1  |       | 81.4  |       |
| 254540154 | 1810006K21Rik; Tmem258     | 79   | 9.1   |                                                                                                     |       | 110.6 |       | 93    |       | 99.9  |       | 112.4 |
| 168480117 | Slc25a32                   | 316  | 35    |                                                                                                     |       | 91.7  |       | 89    |       | 109.4 |       | 109.4 |
| 46195800  | Rgl2                       | 778  | 83.8  | Ras signaling pathway                                                                               |       | 130.3 |       | 103   |       | 85.8  |       | 106.9 |
| 198278417 | Tex30                      | 225  | 25.2  |                                                                                                     | 71.6  | 79.1  | 69.9  | 78.1  | 122   | 117.7 | 131   | 126.5 |
| 21313504  | Gins3                      | 216  | 24.6  |                                                                                                     | 97.9  | 103.7 | 85.4  | 93.6  | 118.9 | 120.6 | 122.9 | 112.6 |
| 112181164 | Tmco6                      | 494  | 54.9  |                                                                                                     | 87.6  | 99.7  | 78.7  | 93    | 100.6 | 104.2 | 107.4 | 77.7  |
| 194328670 | Drosha                     | 1373 | 158.7 | Proteoglycans in cancer; Ribosome biogenesis in eukaryotes                                          | 97.4  | 84    | 78.3  | 84.7  | 108.9 | 98.1  | 114.8 | 130.8 |
| 31560754  | Slc25a25                   | 514  | 56.7  |                                                                                                     |       |       |       |       |       |       |       |       |
| 257467575 | Trappc9                    | 1139 | 127.2 |                                                                                                     |       |       |       |       |       |       |       |       |
| 47059149  | Poc1b                      | 476  | 53.5  |                                                                                                     | 117.5 |       | 119.5 |       | 79.4  |       | 76.6  |       |
| 255003698 | 0610007P22Rik; Tsr3        | 323  | 35.3  |                                                                                                     | 101.7 | 107.8 | 77.8  | 85.7  | 138.5 | 139.7 | 112.2 | 100.9 |
| 87044890  | Smurf1                     | 731  | 83.3  | Endocytosis; Ubiquitin mediated proteolysis; TGF-beta signaling pathway; Hedgehog signaling pathway | 103.3 |       | 92.7  |       | 88.8  |       | 103.6 |       |
| 20270192  | Taf13                      | 124  | 14.3  | Herpes simplex infection; Basal transcription factors                                               | 103.1 |       | 103.8 |       | 86.1  |       | 112.5 |       |
| 21313610  | Tada1                      | 335  | 37.4  |                                                                                                     |       | 102.7 |       | 102.9 |       | 109.9 |       | 99.8  |
| 26986605  | Foxred1                    | 493  | 54.9  |                                                                                                     |       | 114.1 |       | 99.3  |       | 102   |       | 87.6  |
| 66955879  | Fam173a                    | 229  | 24.7  |                                                                                                     |       |       |       |       |       |       |       |       |
| 20452466  | Fech                       | 422  | 47.4  | Metabolic pathways; Porphyrin and chlorophyll metabolism                                            |       |       |       |       |       |       |       |       |
| 10048414  | Srf                        | 504  | 51.2  | MAPK signaling pathway; HTLV-I infection; cGMP-PKG signaling pathway; Viral carcinogenesis          |       |       |       |       |       |       |       |       |
| 38142456  | Abhd17b; Fam108b           | 288  | 32.2  |                                                                                                     | 122.5 |       | 108.5 |       | 97.4  |       | 86    |       |
| 13385672  | Slc25a46                   | 418  | 46.2  |                                                                                                     | 109.6 | 106.1 | 98    | 97.4  | 85.6  | 95.6  | 100.1 | 93.4  |
| 110625879 | Osbp12                     | 484  | 55.3  |                                                                                                     | 138.1 | 135.8 | 98.6  | 95.4  | 125.9 | 111   | 69.3  | 79.8  |
| 29244192  | Lrrc8a                     | 810  | 94.1  |                                                                                                     | 112.9 |       | 104.6 |       | 84.5  |       | 89.7  |       |
| 31981425  | Dpp7                       | 506  | 56.2  |                                                                                                     | 118.6 | 134.7 | 122.6 | 123.5 | 92.5  | 91    | 82.8  | 78.9  |
| 226874867 | Llg1                       | 1062 | 115.5 |                                                                                                     | 106.6 |       | 95.2  |       | 100.4 |       | 100.1 |       |
| 110625737 | Riok3                      | 519  | 58.7  |                                                                                                     | 87.7  | 90    | 86.2  | 85.5  | 111.8 | 137.3 | 128   | 110.4 |
| 88759341  | Rnf113a2                   | 337  | 38    |                                                                                                     | 107.7 | 116.4 | 118.7 | 121.5 | 121.6 | 116.5 | 64.2  | 61.4  |
| 148222065 | Neb                        | 7152 | 828.1 |                                                                                                     | 113.9 | 107.7 | 111.8 | 105   | 86.2  | 87.1  | 80    | 99.5  |
| 82905251  | Pin4; Gm6851; LOC105247253 | 131  | 13.8  |                                                                                                     | 103.9 | 107.8 | 125.8 | 122.4 | 84.5  | 85.6  | 87.2  | 88    |
| 123703979 | Hdx                        | 692  | 76.8  |                                                                                                     | 78.1  |       | 82.5  |       | 146.3 |       | 122.8 |       |
| 7305589   | Tpk1                       | 243  | 27.1  | Thiamine metabolism; Metabolic pathways                                                             |       | 113.5 |       | 113.6 |       | 76.5  |       | 98.7  |





|           |                                      |      |       |                                                                                                                                                                                                                                             |       |       |       |       |       |       |       |       |
|-----------|--------------------------------------|------|-------|---------------------------------------------------------------------------------------------------------------------------------------------------------------------------------------------------------------------------------------------|-------|-------|-------|-------|-------|-------|-------|-------|
| 50845430  | R3hdm1                               | 1135 | 124.3 |                                                                                                                                                                                                                                             | 90.9  | 92.1  | 99.6  | 103   | 122.4 | 118.7 | 94.3  | 100.8 |
| 110626163 | Pgs1                                 | 553  | 62.5  | Metabolic pathways; Glycerophospholipid metabolism                                                                                                                                                                                          | 101   |       | 103   |       | 100.4 |       | 95.2  |       |
| 13384990  | Mien1                                | 115  | 12.3  |                                                                                                                                                                                                                                             |       | 137.5 |       | 123.3 |       | 84.9  |       | 89.3  |
| 91064878  | Zmynd8                               | 1255 | 139.1 |                                                                                                                                                                                                                                             | 89.7  |       | 93.5  |       | 87    |       | 131.4 |       |
| 145966792 | Rbm33                                | 1231 | 137.2 |                                                                                                                                                                                                                                             | 96    |       | 132.4 |       | 114.8 |       | 79.9  |       |
| 13384728  | 1110001J<br>03Rik;<br>Emc1           | 113  | 12.7  |                                                                                                                                                                                                                                             | 83.3  |       | 78    |       | 107   |       | 106.3 |       |
| 85677482  | Sacs                                 | 768  | 85.4  |                                                                                                                                                                                                                                             |       | 108.3 |       | 88.3  |       | 124.2 |       | 94.6  |
| 31712018  | Sirt6                                | 334  | 36.9  | Central carbon metabolism in cancer                                                                                                                                                                                                         |       | 112.8 |       | 94.5  |       | 101.9 |       | 103.6 |
| 13385560  | 2900010<br>M23Rik;<br>Mnfl;<br>Uacc2 | 136  | 16.3  |                                                                                                                                                                                                                                             | 84.1  | 86.5  | 93.2  | 93.4  | 95.3  | 111.7 | 132.2 | 102.8 |
| 124487376 | 4933407H<br>18Rik;<br>Uyssa          | 717  | 81.7  |                                                                                                                                                                                                                                             | 109.7 |       | 133.1 |       | 80.8  |       | 85.6  |       |
| 153791304 | Prr12                                | 2035 | 211.7 |                                                                                                                                                                                                                                             |       |       |       |       |       |       |       |       |
| 13385262  | Tmem223                              | 199  | 21.8  |                                                                                                                                                                                                                                             | 111.3 |       | 89.1  |       | 101.6 |       | 89    |       |
| 404501474 | Coro2a                               | 543  | 61.7  |                                                                                                                                                                                                                                             | 121.7 | 134.2 | 172.4 | 153.1 | 91.2  | 89.1  | 83.5  | 87.3  |
| 29789231  | Zfp84                                | 559  | 64.9  |                                                                                                                                                                                                                                             | 100.9 | 99.2  | 85.9  | 71    | 115.9 | 106.8 | 112.1 | 115.5 |
| 13385136  | Atpbd4;<br>Dph6                      | 267  | 29.9  |                                                                                                                                                                                                                                             |       |       |       |       |       |       |       |       |
| 228480241 | Mtx2                                 | 263  | 29.7  |                                                                                                                                                                                                                                             | 112.4 |       | 99.4  |       | 110.1 |       | 61.3  |       |
| 113374190 | Zscan21                              | 555  | 63    |                                                                                                                                                                                                                                             | 114.5 |       | 103.9 |       | 97.7  |       | 100.8 |       |
| 166851838 | Eif2ak4                              | 1648 | 186.4 | Herpes simplex infection; Epstein-Barr virus infection;<br>Influenza A; Hepatitis C; Protein processing in endoplasmic<br>reticulum; Measles                                                                                                | 114.3 | 134.6 | 70.2  | 82.6  | 91.8  | 99.6  | 101.4 | 113.2 |
| 154759286 | Adat3                                | 349  | 37.5  |                                                                                                                                                                                                                                             | 103.4 |       | 110.4 |       | 108.9 |       | 96.1  |       |
| 19527220  | Fig4                                 | 907  | 103.4 |                                                                                                                                                                                                                                             |       | 107.7 |       | 106.6 |       | 96.9  |       | 96.5  |
| 6755128   | Pou2af1                              | 256  | 27.7  |                                                                                                                                                                                                                                             | 102   | 94.8  | 98.8  | 96.3  | 112.1 | 112.4 | 119.2 | 111.6 |
| 120587017 | Hspbap1                              | 483  | 54.4  |                                                                                                                                                                                                                                             | 102.7 | 106.5 | 97.6  | 99.9  | 85.1  | 92.9  | 93.6  | 93.5  |
| 157153642 | Vmn2r101                             | 857  | 98.9  |                                                                                                                                                                                                                                             |       |       |       |       |       |       |       |       |
| 31981953  | Traf1                                | 409  | 45.4  | Herpes simplex infection; TNF signaling pathway; Epstein-<br>Barr virus infection; Small cell lung cancer; Transcriptional<br>misregulation in cancer; Pathways in cancer; NF-kappa B<br>signaling pathway; Viral carcinogenesis; Apoptosis | 96.6  | 93.3  | 98.9  | 96.9  | 104.6 | 109   | 99.5  | 101.2 |
| 6755278   | Rad51d;<br>Rad51l3                   | 329  | 35.2  | Homologous recombination                                                                                                                                                                                                                    |       | 92.6  |       | 106.9 |       | 101.6 |       | 91.5  |
| 258645125 | Spp12a                               | 523  | 58.1  |                                                                                                                                                                                                                                             |       | 145.2 |       | 85.2  |       | 101.1 |       | 128.9 |
| 28893125  | Cenpt                                | 515  | 56.2  |                                                                                                                                                                                                                                             |       | 96.7  |       | 96.2  |       | 123   |       | 95.1  |
| 11496243  | Sh2d2a                               | 374  | 40.9  | VEGF signaling pathway                                                                                                                                                                                                                      | 96    |       | 84.4  |       | 118.4 |       | 103   |       |

|           |                             |      |       |                                                                                                                                                                                     |       |       |       |       |       |       |       |       |
|-----------|-----------------------------|------|-------|-------------------------------------------------------------------------------------------------------------------------------------------------------------------------------------|-------|-------|-------|-------|-------|-------|-------|-------|
| 20806111  | Ube2g2                      | 165  | 18.6  | Ubiquitin mediated proteolysis; Parkinson's disease; Protein processing in endoplasmic reticulum                                                                                    |       | 97.7  |       | 99.4  |       | 82.5  |       | 88.6  |
| 13385960  | Atp5g2                      | 146  | 15.5  | Metabolic pathways; Huntington's disease; Oxidative phosphorylation; Parkinson's disease; Alzheimer's disease                                                                       | 97.7  | 96.4  | 93.8  | 93.2  | 109   | 110.1 | 102   | 98    |
| 39841023  | Dgkq                        | 934  | 102.2 | Phospholipase D signaling pathway; Metabolic pathways; Glycerophospholipid metabolism; Glycerolipid metabolism; Choline metabolism in cancer; Phosphatidylinositol signaling system | 82.5  |       | 108.4 |       | 88.3  |       | 92.6  |       |
| 110625631 | Cog7                        | 770  | 86    |                                                                                                                                                                                     | 88.7  | 97.9  | 93.4  | 92    | 100.7 | 105.8 | 131.2 | 111.7 |
| 27754101  | Med29                       | 199  | 21    |                                                                                                                                                                                     | 113.1 | 101.3 | 88.2  | 79.1  | 103.5 | 99.2  | 129.5 | 124.4 |
| 30794254  | Hmgxb4                      | 594  | 65.3  |                                                                                                                                                                                     | 114.9 | 111.4 | 99.4  | 98.7  | 100.5 | 99.8  | 93.9  | 105   |
| 158631230 | Tmem66;<br>Saraf            | 363  | 38.7  |                                                                                                                                                                                     | 107.3 | 108.9 | 97.5  | 91.5  | 95.6  | 97.2  | 106.2 | 108.2 |
| 22164798  | Selenbp1                    | 472  | 52.5  |                                                                                                                                                                                     | 129.2 |       | 117   |       | 78.7  |       | 81.8  |       |
| 31980632  | Lxn                         | 222  | 25.5  |                                                                                                                                                                                     | 93.4  |       | 85.1  |       | 94.7  |       | 106.5 |       |
| 31560705  | Acs11                       | 699  | 77.9  | PPAR signaling pathway; Fatty acid metabolism; Metabolic pathways; Fatty acid degradation; Adipocytokine signaling pathway; Fatty acid biosynthesis; Peroxisome                     | 111.2 | 95    | 92.4  | 89.7  | 97.4  | 109.1 | 77.7  | 100.4 |
| 115495457 | Kmt2b;<br>Wbp7              | 2713 | 294.6 | Lysine degradation                                                                                                                                                                  | 87.4  |       | 63.1  |       | 98.8  |       | 134.2 |       |
| 157042787 | Epc2                        | 808  | 90.9  |                                                                                                                                                                                     | 107.8 |       | 103.3 |       | 113.6 |       | 114.3 |       |
| 255683320 | Abcc4                       | 1325 | 148.8 | ABC transporters; Antifolate resistance; Bile secretion; cAMP signaling pathway                                                                                                     |       |       |       |       |       |       |       |       |
| 124487341 | Secisbp21                   | 1089 | 119.7 |                                                                                                                                                                                     |       | 102.9 |       | 89    |       | 115.1 |       | 98.2  |
| 31542287  | Nol12                       | 217  | 25.3  |                                                                                                                                                                                     | 167.2 | 147   | 95.7  | 95.4  | 83.3  | 89.6  | 103.9 | 100.9 |
| 127138894 | Mkl1                        | 964  | 102.5 |                                                                                                                                                                                     | 93    | 89.4  | 97.4  | 86.4  | 98.6  | 104.3 | 111.3 | 126.9 |
| 23956080  | Prkx                        | 355  | 40.4  |                                                                                                                                                                                     | 104.9 | 130.1 | 102.7 | 99.1  | 93.3  | 91.7  | 71.5  | 86    |
| 84993237  | Fam60a;<br>LOC1026<br>36734 | 221  | 24.8  |                                                                                                                                                                                     | 106.4 |       | 99    |       | 102.5 |       | 110.9 |       |
| 6677975   | Tra2b                       | 288  | 33.6  | Spliceosome                                                                                                                                                                         | 95    | 89.5  | 90.8  | 116.4 | 103   | 104.6 | 92.4  | 85.6  |
| 58037279  | Rpusd4                      | 377  | 42.4  |                                                                                                                                                                                     | 119.7 |       | 102.1 |       | 104.4 |       | 108.5 |       |
| 6755702   | Suv39h1                     | 412  | 47.7  | Lysine degradation                                                                                                                                                                  | 87.5  | 106.5 | 73.3  | 119.1 | 122.5 | 114.3 | 113.7 | 94.4  |
| 262118314 | Sfmbt1                      | 863  | 97.3  |                                                                                                                                                                                     | 98.2  |       | 94.8  |       | 109.6 |       | 114.7 |       |
| 160333332 | Ccdc99;<br>Spdl1            | 608  | 70.2  |                                                                                                                                                                                     | 102.4 | 111.5 | 116.3 | 118.2 | 103.1 | 109   | 100.5 | 90.7  |
| 29789329  | Zfp451                      | 1056 | 120   |                                                                                                                                                                                     |       | 108.1 |       | 110.5 |       | 90.1  |       | 91.1  |
| 312433970 | Zmynd11                     | 602  | 70.8  |                                                                                                                                                                                     | 109.7 |       | 108.6 |       | 90.4  |       | 100   |       |
| 31560262  | Sdhaf2                      | 164  | 19.4  |                                                                                                                                                                                     |       |       |       |       |       |       |       |       |
| 54027904  | Rnf123                      | 1314 | 148.6 |                                                                                                                                                                                     | 98    | 102.2 | 85.6  | 95.9  | 99.8  | 103.5 | 116.4 | 103.9 |
| 13384854  | Mrps17                      | 120  | 13.4  | Ribosome                                                                                                                                                                            |       | 95.6  |       | 106   |       | 108.3 |       | 74.3  |
| 304361725 | Phactr2                     | 626  | 68.4  |                                                                                                                                                                                     | 89.2  | 89.1  | 64.7  | 69.6  | 124.8 | 130.2 | 142.1 | 134.3 |

|           |                                                             |      |       |                                                                                                                                                           |       |       |       |       |       |       |       |       |
|-----------|-------------------------------------------------------------|------|-------|-----------------------------------------------------------------------------------------------------------------------------------------------------------|-------|-------|-------|-------|-------|-------|-------|-------|
| 116805315 | BC003331                                                    | 447  | 50    |                                                                                                                                                           | 126.6 | 121.1 | 104.6 | 98    | 96    | 95.3  | 108.2 | 102.2 |
| 20149722  | Syt17                                                       | 470  | 53.3  |                                                                                                                                                           | 111.3 |       | 104.1 |       | 91.1  |       | 101.9 |       |
| 281427221 | Loh12cr1;<br>Borcs5                                         | 196  | 22.6  |                                                                                                                                                           | 96.7  |       | 95.1  |       | 138.2 |       | 91.7  |       |
| 110835706 | Plekha5                                                     | 1269 | 144.3 |                                                                                                                                                           |       | 98.4  |       | 116.4 |       | 108   |       | 89.6  |
| 257196125 | Snrk                                                        | 748  | 81.9  |                                                                                                                                                           | 97.6  |       | 99.5  |       | 74.6  |       | 132.2 |       |
| 312261230 | Lgals8                                                      | 316  | 36.1  |                                                                                                                                                           | 102.6 |       | 106.7 |       | 99.1  |       | 81.8  |       |
| 158937258 | Yif1b                                                       | 311  | 34    |                                                                                                                                                           | 95.8  |       | 94.8  |       | 103.5 |       | 118.7 |       |
| 21311917  | Scyl3                                                       | 735  | 81.3  |                                                                                                                                                           |       |       |       |       |       |       |       |       |
| 40255287  | Znrf2                                                       | 238  | 23.7  |                                                                                                                                                           | 103.4 |       | 116.9 |       | 90.6  |       | 102   |       |
| 27370168  | Ankrd52                                                     | 1076 | 115   |                                                                                                                                                           | 124   |       | 90.1  |       | 126.8 |       | 84.1  |       |
| 89257352  | Hdac3                                                       | 428  | 48.8  | Thyroid hormone signaling pathway; Alcoholism; Viral carcinogenesis                                                                                       |       |       |       |       |       |       |       |       |
| 164663850 | Rnf13                                                       | 381  | 42.7  |                                                                                                                                                           | 93.4  | 84.6  | 90    | 99.5  | 119   | 114.5 | 100.6 | 120.1 |
| 133778935 | Pphln1                                                      | 381  | 43.8  |                                                                                                                                                           | 142.1 |       | 102.2 |       | 86.6  |       | 86.1  |       |
| 21312888  | Ube2c                                                       | 179  | 19.6  | Ubiquitin mediated proteolysis                                                                                                                            | 80.5  | 73.2  | 78.7  | 68.2  | 135.1 | 143   | 141.2 | 157.3 |
| 164664500 | Cd247                                                       | 164  | 18.6  | Chagas disease (American trypanosomiasis); T cell receptor signaling pathway; Natural killer cell mediated cytotoxicity; Th1 and Th2 cell differentiation | 135   |       | 151.8 |       | 65.1  |       | 42.9  |       |
| 253795504 | Tpmt                                                        | 240  | 27.6  | Drug metabolism - other enzymes                                                                                                                           | 90.9  | 70.3  | 104.6 | 70.4  | 111.2 | 125.2 | 91.4  | 124.2 |
| 124249084 | 2210018<br>M11Rik;<br>Emsv                                  | 1264 | 135.2 |                                                                                                                                                           |       | 123.7 |       | 115.6 |       | 119.3 |       | 91.8  |
| 21361250  | Atp6ap2                                                     | 350  | 39.1  | Renin-angiotensin system                                                                                                                                  | 84.7  | 85.7  | 79.8  | 76.9  | 109.3 | 119.2 | 107.7 | 103.7 |
| 27228993  | Spryd7                                                      | 196  | 21.7  |                                                                                                                                                           | 93.8  | 100.3 | 95.2  | 99.6  | 91.2  | 92.3  | 92.3  | 97.1  |
| 160333150 | Cnep1r1;<br>Tmem188                                         | 125  | 14.3  |                                                                                                                                                           | 103.1 | 101.3 | 84.4  | 78.5  | 114.2 | 122.8 | 121.1 | 107.4 |
| 13195638  | Der11                                                       | 251  | 28.8  | Amyotrophic lateral sclerosis (ALS); Protein processing in endoplasmic reticulum                                                                          |       | 89.7  |       | 90.1  |       | 90.1  |       | 51.6  |
| 22094083  | Cd48                                                        | 240  | 27.4  | Natural killer cell mediated cytotoxicity                                                                                                                 | 91.4  | 91.4  | 105.7 | 103.2 | 99.8  | 89.2  | 105.8 | 104.4 |
| 149255928 | Ptp4a1;<br>Gm5582;<br>LOC1000<br>44742;<br>LOC1026<br>43131 | 173  | 19.8  |                                                                                                                                                           | 106.6 | 97.3  | 98.4  | 95.3  | 93.7  | 103.4 | 93.9  | 94.9  |
| 21218432  | Stard5                                                      | 213  | 23.9  |                                                                                                                                                           | 136.5 | 116.6 | 107.4 | 109.8 | 70.4  | 88.8  | 95.8  | 93.2  |
| 19111162  | Tm9sf3                                                      | 587  | 67.5  |                                                                                                                                                           |       | 84.7  |       | 82.8  |       | 113   |       | 110.7 |
| 13626040  | Akap12                                                      | 1684 | 180.6 |                                                                                                                                                           | 114.2 | 123.7 | 113.1 | 112.9 | 99    | 92.8  | 94.2  | 97    |
| 110625952 | 1700054N<br>08Rik;<br>Ccsan                                 | 252  | 28.4  |                                                                                                                                                           | 124.2 | 126.9 | 121.2 | 119.1 | 76.7  | 82.7  | 95.9  | 98    |
| 29789165  | Tbc1d20                                                     | 402  | 45.8  |                                                                                                                                                           | 89.2  | 108.1 | 119.8 | 91.9  | 105.3 | 110.9 | 99.5  | 109.8 |

|           |                  |      |       |                                                                                                                                                                                                                                                                 |       |       |       |       |       |       |       |       |
|-----------|------------------|------|-------|-----------------------------------------------------------------------------------------------------------------------------------------------------------------------------------------------------------------------------------------------------------------|-------|-------|-------|-------|-------|-------|-------|-------|
| 160333366 | Birc2            | 612  | 69.6  | Platinum drug resistance; Ubiquitin mediated proteolysis; TNF signaling pathway; Focal adhesion; NOD-like receptor signaling pathway; Toxoplasmosis; Hippo signaling pathway; Small cell lung cancer; Apoptosis - multiple species; Pathways in cancer; NE-kann | 95.2  | 101.3 | 119.6 | 121.6 | 92.3  | 90.2  | 93.7  | 92.4  |
| 225007636 | Ddx4             | 728  | 79.2  |                                                                                                                                                                                                                                                                 |       |       |       |       |       |       |       |       |
| 226958579 | Vwa8             | 1905 | 213.3 |                                                                                                                                                                                                                                                                 | 101.7 |       | 126.5 |       | 120.4 |       | 88.4  |       |
| 6754634   | Mapk7            | 806  | 87.7  | Oxytocin signaling pathway; MAPK signaling pathway; MicroRNAs in cancer; Neurotrophin signaling pathway; GnRH signaling pathway; Gap junction                                                                                                                   |       |       |       |       |       |       |       |       |
| 6679719   | Ezh1             | 750  | 85.5  | Lysine degradation                                                                                                                                                                                                                                              | 107.6 |       | 104.3 |       | 93.3  |       | 92.1  |       |
| 33859608  | Rab19            | 217  | 24.4  |                                                                                                                                                                                                                                                                 | 137.6 |       | 110.3 |       | 88.1  |       | 115.3 |       |
| 27369998  | Slc25a24         | 475  | 52.9  |                                                                                                                                                                                                                                                                 | 147.1 | 133.9 | 119.6 | 123.4 | 76.2  | 86.7  | 68.2  | 65.6  |
| 189491671 | Diap2;<br>Diaph2 | 1102 | 125.3 | Regulation of actin cytoskeleton                                                                                                                                                                                                                                | 130.3 | 144.5 | 106.8 | 102.9 | 89.5  | 96.6  | 91.9  | 81.2  |
| 113199783 | Msx1             | 303  | 31.7  | HTLV-I infection                                                                                                                                                                                                                                                | 117.5 | 109   | 105.2 | 106.6 | 102.7 | 84.9  | 86.8  | 99.6  |
| 27370132  | Ttc12            | 704  | 78.7  |                                                                                                                                                                                                                                                                 | 72.3  | 74.4  | 90.5  | 94.5  | 114.4 | 111.6 | 132.3 | 123.2 |
| 61969660  | Scrn3            | 418  | 47.6  |                                                                                                                                                                                                                                                                 |       |       |       |       |       |       |       |       |
| 239787881 | Tgfr2            | 592  | 67.1  | FoxO signaling pathway; AGE-RAGE signaling pathway in diabetic complications; Endocytosis; Chagas disease (American trypanosomiasis); MAPK signaling pathway; Hippo signaling pathway; HTLV-I infection; Osteoclast differentiation; Adherens junction; Transcr | 99.2  | 104.2 | 114.6 | 105.4 | 89.3  | 90.3  | 87.8  | 94.1  |
| 134053933 | Rbm38            | 237  | 25.3  |                                                                                                                                                                                                                                                                 | 106   | 104.7 | 118.7 | 109.5 | 94.3  | 86.4  | 91.4  | 91.1  |
| 51230692  | Ralgapa1         | 2083 | 234.1 |                                                                                                                                                                                                                                                                 |       | 103.8 |       | 106   |       | 101.7 |       | 93.5  |
| 86439977  | Rbbp9            | 186  | 20.9  |                                                                                                                                                                                                                                                                 | 115.4 | 125.4 | 118.6 | 141.6 | 96.8  | 83.9  | 98.1  | 70.7  |
| 51592080  | Spty2d1          | 682  | 74.8  |                                                                                                                                                                                                                                                                 | 103.8 | 105.4 | 106.8 | 103.6 | 115.9 | 95.9  | 96    | 102.5 |
| 13385976  | Mrpl19           | 292  | 33.6  | Ribosome                                                                                                                                                                                                                                                        | 94.1  | 98.4  | 87.1  | 88.2  | 110.9 | 114.3 | 116.6 | 119.3 |
| 12963705  | Elf2             | 593  | 63.2  |                                                                                                                                                                                                                                                                 |       | 94.9  |       | 100.7 |       | 139.3 |       | 96    |
| 282396086 | C1galt1          | 363  | 42.3  | Metabolic pathways; Mucin type O-glycan biosynthesis                                                                                                                                                                                                            | 88    | 83.8  | 83.3  | 88.2  | 117.8 | 105.4 | 101.1 | 106   |
| 251823814 | Mdm1             | 718  | 80.8  |                                                                                                                                                                                                                                                                 | 87    | 91.2  | 110.7 | 112.3 | 123.8 | 126.3 | 96.6  | 105   |
| 124486616 | Zc3h7b           | 982  | 110.2 |                                                                                                                                                                                                                                                                 | 100.7 | 98    | 80.3  | 89.3  | 132.9 | 115.3 | 113.3 | 109.3 |
| 283436216 | Hace1            | 909  | 102   |                                                                                                                                                                                                                                                                 | 115.5 | 108.9 | 95.6  | 102.3 | 95.7  | 104.4 | 96.8  | 97.4  |
| 51491882  | Slain1           | 579  | 61.3  |                                                                                                                                                                                                                                                                 | 110.3 | 119.8 | 121.9 | 113.8 | 85    | 80.7  | 110.3 | 111.8 |
| 124487321 | Wdr76            | 524  | 57.9  |                                                                                                                                                                                                                                                                 |       | 99.3  |       | 96.1  |       | 118.3 |       | 104.6 |
| 260099670 | Pkn2             | 983  | 111.5 | Salmonella infection; PI3K-Akt signaling pathway                                                                                                                                                                                                                | 95.2  |       | 105.5 |       | 106.1 |       | 91    |       |
| 84000003  | Kat2a            | 830  | 93.3  | HTLV-I infection; Notch signaling pathway; Thyroid hormone signaling pathway; Viral carcinogenesis                                                                                                                                                              | 94.4  | 102.6 | 98.9  | 97.8  | 135.3 | 138.4 | 105.8 | 96.4  |
| 172073164 | Prdm1            | 823  | 91.7  |                                                                                                                                                                                                                                                                 | 105.7 | 111.2 | 106.1 | 113.6 | 90.4  | 93.8  | 73.6  | 76.5  |
| 167900468 | Pigb             | 542  | 63.1  | Glycosylphosphatidylinositol (GPI)-anchor biosynthesis; Metabolic pathways                                                                                                                                                                                      | 103   |       | 105.6 |       | 99.8  |       | 98.1  |       |

|           |                               |      |       |                                                                                                                                                                                                                                                     |       |       |       |       |       |       |       |       |
|-----------|-------------------------------|------|-------|-----------------------------------------------------------------------------------------------------------------------------------------------------------------------------------------------------------------------------------------------------|-------|-------|-------|-------|-------|-------|-------|-------|
| 327412305 | A430107P<br>09Rik;<br>Trav3-3 | 155  | 17.4  |                                                                                                                                                                                                                                                     | 104.3 |       | 92.2  |       | 97.7  |       | 100.8 |       |
| 122937353 | Flt3                          | 1000 | 113.3 | Acute myeloid leukemia; Transcriptional misregulation in cancer; Pathways in cancer; Central carbon metabolism in cancer; Hematopoietic cell lineage; Cytokine-cytokine receptor interaction                                                        |       |       |       |       |       |       |       |       |
| 313747488 | Ei24                          | 358  | 40.8  | p53 signaling pathway                                                                                                                                                                                                                               |       |       |       |       |       |       |       |       |
| 187960064 | Ercc1                         | 298  | 32.9  | Platinum drug resistance; Nucleotide excision repair; Fanconi anemia pathway                                                                                                                                                                        |       | 106.8 |       | 97.2  |       | 100.9 |       | 90.9  |
| 6756003   | Wnt10b                        | 389  | 43.1  | mTOR signaling pathway; Wnt signaling pathway; Basal cell carcinoma; Hippo signaling pathway; Breast cancer; Signaling pathways regulating pluripotency of stem cells; Melanogenesis; HTLV-I infection; Proteoglycans in cancer; Pathways in cancer | 98.1  | 101.9 | 94.7  | 99.8  | 106.5 | 108.6 | 117.1 | 107.4 |
| 21313116  | Pcgf5                         | 236  | 27.5  | Signaling pathways regulating pluripotency of stem cells                                                                                                                                                                                            | 91.7  | 97    | 85.8  | 97.1  | 108.7 | 110.6 | 95    | 88.6  |
| 9910166   | Cript                         | 101  | 11.3  |                                                                                                                                                                                                                                                     | 106.1 | 102.4 | 101.8 | 104.5 | 88.4  | 91.2  | 102.1 | 101.2 |
| 23956152  | Mrps18b                       | 254  | 28.7  | Viral carcinogenesis                                                                                                                                                                                                                                | 85    | 79.6  | 79.9  | 79.5  | 108.2 | 112.1 | 139.9 | 140.5 |
| 31982627  | Rgl3                          | 709  | 77.9  |                                                                                                                                                                                                                                                     |       |       |       |       |       |       |       |       |
| 167900448 | Scfd2                         | 684  | 74.7  |                                                                                                                                                                                                                                                     | 115.9 | 110.1 | 101   | 98.1  | 96.8  | 99.5  | 90.5  | 106.1 |
| 15826842  | Serpinb9b                     | 377  | 42.7  | Amoebiasis                                                                                                                                                                                                                                          | 124.8 |       | 110.4 |       | 89.1  |       | 117   |       |
| 111494223 | Nt5dc3                        | 546  | 63.1  |                                                                                                                                                                                                                                                     | 97.5  |       | 85.4  |       | 118.9 |       | 110   |       |
| 34328057  | Usp12                         | 370  | 42.9  |                                                                                                                                                                                                                                                     | 93.7  |       | 105.6 |       | 99    |       | 102.7 |       |
| 31981870  | L3mbtl2                       | 703  | 78.9  |                                                                                                                                                                                                                                                     | 92.3  | 98.6  | 98.6  | 99.5  | 97.3  | 98.4  | 112.8 | 106.8 |
| 28076899  | Uxs1                          | 420  | 47.5  | Metabolic pathways; Amino sugar and nucleotide sugar metabolism                                                                                                                                                                                     | 85    |       | 82.9  |       | 107.4 |       | 125.9 |       |
| 6754906   | Nubp1                         | 320  | 34.1  |                                                                                                                                                                                                                                                     | 89.7  | 90.2  | 86.8  | 87.6  | 104.8 | 107.1 | 118.9 | 122.8 |
| 255003684 | Taok2                         | 1240 | 139.2 | MAPK signaling pathway                                                                                                                                                                                                                              |       |       |       |       |       |       |       |       |
| 157042778 | Cir1                          | 450  | 51.8  | Notch signaling pathway                                                                                                                                                                                                                             | 101   |       | 103.2 |       | 101   |       | 104.7 |       |
| 356991183 | Slc25a19                      | 318  | 35.6  |                                                                                                                                                                                                                                                     | 100.1 | 109.4 | 104.2 | 101.5 | 113.4 | 123.5 | 97.4  | 85.2  |
| 62530188  | Ahsa2                         | 331  | 37.6  |                                                                                                                                                                                                                                                     | 118.5 |       | 85.6  |       | 105.5 |       | 114.9 |       |
| 118150631 | Ccdc28a                       | 184  | 20.3  |                                                                                                                                                                                                                                                     | 131.5 |       | 91.7  |       | 115.6 |       | 98.4  |       |
| 118150670 | Slc39a7                       | 476  | 50.6  |                                                                                                                                                                                                                                                     | 101.5 | 106.3 | 99.2  | 101.5 | 102.3 | 99.3  | 95.5  | 93.3  |
| 42734451  | Paxip1                        | 1056 | 119.2 |                                                                                                                                                                                                                                                     |       |       |       |       |       |       |       |       |
| 71061451  | Cyp51                         | 503  | 56.7  | Steroid biosynthesis; Metabolic pathways                                                                                                                                                                                                            | 49.4  |       | 48    |       | 163.3 |       | 163.1 |       |
| 31980697  | Bloc1s1                       | 125  | 14.3  |                                                                                                                                                                                                                                                     | 106.6 | 106.3 | 105.3 | 110   | 95.2  | 93.2  | 94    | 90.6  |
| 341926298 | Alg11                         | 492  | 55.2  | Metabolic pathways; N-Glycan biosynthesis                                                                                                                                                                                                           | 107.5 | 98.6  | 101.6 | 101.1 | 113.3 | 110.7 | 101.4 | 99.6  |
| 12963731  | Mvk                           | 395  | 41.9  | Metabolic pathways; Terpenoid backbone biosynthesis; Peroxisome                                                                                                                                                                                     | 267.4 | 277.6 | 216.2 | 214.7 | 52    | 48.2  | 49.8  | 47.1  |
| 19526900  | Tmem30a                       | 364  | 41    |                                                                                                                                                                                                                                                     |       | 89.9  |       | 96.7  |       | 98.2  |       | 109   |
| 17921976  | Haao                          | 286  | 32.8  | Tryptophan metabolism; Metabolic pathways                                                                                                                                                                                                           |       |       |       |       |       |       |       |       |

|           |                               |      |       |                                                                                                                                                                                                       |       |       |       |       |       |       |       |       |
|-----------|-------------------------------|------|-------|-------------------------------------------------------------------------------------------------------------------------------------------------------------------------------------------------------|-------|-------|-------|-------|-------|-------|-------|-------|
| 31543321  | Nfkbie                        | 364  | 39.2  | T cell receptor signaling pathway; Epstein-Barr virus infection; B cell receptor signaling pathway; Neurotrophin signaling pathway; Adipocytokine signaling pathway; Th1 and Th2 cell differentiation |       |       |       |       |       |       |       |       |
| 34538600  | COX1                          | 514  | 56.9  | Metabolic pathways; Huntington's disease; Non-alcoholic fatty liver disease (NAFLD); Oxidative phosphorylation; Parkinson's disease; Alzheimer's disease; Cardiac muscle contraction                  | 103.1 | 97.9  | 96.5  | 102.5 | 98.3  | 96.2  | 95.7  | 91.2  |
| 229577255 | Rabgap11                      | 815  | 92.3  |                                                                                                                                                                                                       | 97.7  | 110   | 96.2  | 86.3  | 112.2 | 124.6 | 95.4  | 93.3  |
| 58037203  | Hdac8                         | 377  | 41.7  | Alcoholism; Viral carcinogenesis                                                                                                                                                                      | 106.9 |       | 107.6 |       | 95.6  |       | 108.6 |       |
| 13385678  | Ergic1                        | 290  | 32.5  |                                                                                                                                                                                                       | 102.9 |       | 86.6  |       | 123.1 |       | 107.8 |       |
| 9790049   | Noa1                          | 693  | 77.3  |                                                                                                                                                                                                       |       | 94.5  |       | 114.8 |       | 101.3 |       | 91.9  |
| 27370060  | D330028<br>D13Rik;<br>Fam221a | 301  | 33.3  |                                                                                                                                                                                                       | 104.6 | 110.7 | 89.2  | 80.2  | 106.9 | 104.5 | 97.6  | 94.5  |
| 6681079   | Ctsb                          | 339  | 37.3  | NOD-like receptor signaling pathway; Lysosome; Antigen processing and presentation; Renin secretion; Apoptosis                                                                                        | 141.7 | 162.1 | 169.1 | 163   | 73.3  | 73.9  | 73.3  | 81    |
| 306035198 | Commd7                        | 200  | 22.6  |                                                                                                                                                                                                       | 111   | 105.7 | 113.6 | 94.3  | 126   | 97.9  | 79    | 80.1  |
| 21313608  | Tipin                         | 278  | 31.5  |                                                                                                                                                                                                       | 164.4 | 170.7 | 69.4  | 67    | 103.7 | 108.9 | 120.2 | 130.3 |
| 444741722 | Camsap1                       | 1602 | 178.1 |                                                                                                                                                                                                       | 83.5  | 98.7  | 85.7  | 94.7  | 103.5 | 107.6 | 120.1 | 110.1 |
| 18875398  | Bbc3                          | 193  | 20.7  | Platinum drug resistance; p53 signaling pathway; Hippo signaling pathway; Huntington's disease; Apoptosis - multiple species; Measles; Apoptosis                                                      |       |       |       |       |       |       |       |       |
| 21312996  | Kxd1                          | 177  | 20    |                                                                                                                                                                                                       | 107.6 |       | 121.6 |       | 88.5  |       | 87.2  |       |
| 148747868 | Pcdhb11                       | 797  | 87.6  |                                                                                                                                                                                                       | 84.7  | 91.8  | 89.4  | 98.6  | 101.2 | 112.1 | 102.3 | 107.1 |
| 147902337 | Abhd15                        | 459  | 51.1  |                                                                                                                                                                                                       | 98.7  | 108.2 | 105.9 | 97.5  | 107.1 | 97.4  | 108.6 | 110   |
| 170650639 | Zfp110                        | 832  | 94    | Neurotrophin signaling pathway                                                                                                                                                                        | 91.8  |       | 96.3  |       | 97.7  |       | 104.9 |       |
| 254587964 | Acot8                         | 320  | 35.8  | Metabolic pathways; Primary bile acid biosynthesis; Peroxisome                                                                                                                                        | 91.3  |       | 93.2  |       | 106.5 |       | 103.6 |       |
| 225543564 | Yeats2                        | 1407 | 148.9 |                                                                                                                                                                                                       |       |       |       |       |       |       |       |       |
| 344217757 | Rassf1                        | 340  | 38.8  | MicroRNAs in cancer; Ras signaling pathway; Hippo signaling pathway; Non-small cell lung cancer; Hippo signaling pathway -multiple species; Pathways in cancer;                                       | 87.2  |       | 106.9 |       | 94.4  |       | 107   |       |
| 62945234  | Cox17                         | 63   | 6.8   | Metabolic pathways; Oxidative phosphorylation                                                                                                                                                         | 67.8  |       | 89.7  |       | 244.9 |       | 106.5 |       |
| 156766070 | Slc12a6                       | 1150 | 127.4 |                                                                                                                                                                                                       | 107.1 |       | 94.3  |       | 127.1 |       | 107.6 |       |
| 244798004 | Arrdc1                        | 434  | 46.3  |                                                                                                                                                                                                       |       |       |       |       |       |       |       |       |
| 471434864 | Adck1                         | 525  | 59.7  |                                                                                                                                                                                                       | 81.8  | 95.4  | 92.8  | 87.2  | 121.4 | 118.4 | 109.8 | 111.5 |
| 27229185  | Tm9sf1                        | 606  | 68.9  |                                                                                                                                                                                                       | 104   |       | 89.2  |       | 120.1 |       | 111.5 |       |
| 87239970  | Lipe                          | 802  | 88    |                                                                                                                                                                                                       | 109.1 | 107.9 | 110.2 | 99.7  | 93.9  | 88.6  | 93    | 82.5  |
| 110225335 | Chrnd                         | 520  | 59.1  | Neuroactive ligand-receptor interaction                                                                                                                                                               | 135.4 | 135.1 | 118.9 | 123.2 | 80.1  | 81.5  | 87.5  | 84.1  |
| 26986551  | Sidt2                         | 832  | 94.4  |                                                                                                                                                                                                       | 95.2  |       | 100.6 |       | 119.3 |       | 79.1  |       |

|           |                                                                                                            |      |       |                                                                                                                                                                                                                                                                 |       |       |       |       |       |       |       |       |
|-----------|------------------------------------------------------------------------------------------------------------|------|-------|-----------------------------------------------------------------------------------------------------------------------------------------------------------------------------------------------------------------------------------------------------------------|-------|-------|-------|-------|-------|-------|-------|-------|
| 224177530 | 1810013D<br>10Rik;<br>Smim20                                                                               | 69   | 7.8   |                                                                                                                                                                                                                                                                 | 118   | 115.6 | 124.1 | 125.5 | 92.8  | 83.6  | 88.2  | 85.6  |
| 133505571 | Kif20b                                                                                                     | 1774 | 203.4 |                                                                                                                                                                                                                                                                 |       |       |       |       |       |       |       |       |
| 124487477 | Naa30                                                                                                      | 366  | 39.7  |                                                                                                                                                                                                                                                                 |       |       |       |       |       |       |       |       |
| 13386132  | Fam111a                                                                                                    | 613  | 69.9  |                                                                                                                                                                                                                                                                 | 75.1  | 86.8  | 53.1  | 63    | 148.6 | 169.4 | 184.1 | 174.4 |
| 9790191   | Rbx1                                                                                                       | 108  | 12.3  | Wnt signaling pathway; Ubiquitin mediated proteolysis; Circadian rhythm; Oocyte meiosis; Nucleotide excision repair; Cell cycle; TGF-beta signaling pathway; HIF-1 signaling pathway; Pathways in cancer; Renal cell carcinoma; Protein processing in endoplasm | 89.3  | 86.1  | 85.9  | 90.4  | 95.4  | 102.2 | 121   | 118.9 |
| 255683337 | 1110004E<br>09Rik                                                                                          | 290  | 33.2  |                                                                                                                                                                                                                                                                 | 116.4 |       | 84.7  |       | 136.9 |       | 81.3  |       |
| 82546849  | Ap5z1;<br>C330006K<br>01Rik                                                                                | 807  | 89.4  |                                                                                                                                                                                                                                                                 | 126.6 | 106.1 | 93.5  | 95.5  | 82.8  | 88.6  | 94.8  | 81.8  |
| 57527870  | Nmnat1                                                                                                     | 285  | 32.3  | metabolic pathways, nicotinate and nicotinamide metabolism                                                                                                                                                                                                      | 95    |       | 130.8 |       | 149.9 |       | 85.9  |       |
| 23397419  | Rbks                                                                                                       | 323  | 34.1  | Pentose phosphate pathway                                                                                                                                                                                                                                       | 110.2 | 110.3 | 101.8 | 98.8  | 107.8 | 120.2 | 90.9  | 99.9  |
| 166197681 | Pdlim7                                                                                                     | 457  | 50.1  |                                                                                                                                                                                                                                                                 | 101.7 |       | 92    |       | 99.6  |       | 108.5 |       |
| 285402518 | Cuedc1                                                                                                     | 391  | 43    |                                                                                                                                                                                                                                                                 | 99.4  | 105.7 | 98.1  | 94.4  | 91.5  | 99.1  | 102.4 | 96.6  |
| 309263978 | Gm340                                                                                                      | 1563 | 169   |                                                                                                                                                                                                                                                                 | 79.4  | 71.3  | 144   | 194.8 | 163.1 | 188.4 | 77.3  | 80.5  |
| 158517825 | Apoc1                                                                                                      | 88   | 9.7   |                                                                                                                                                                                                                                                                 |       |       |       |       |       |       |       |       |
| 34303985  | Ccdc63                                                                                                     | 582  | 68    |                                                                                                                                                                                                                                                                 | 72.8  | 80.5  | 56.6  | 59.2  | 86.2  | 104.5 | 81.9  | 93.8  |
| 124487063 | Kmt2c;<br>Mll3                                                                                             | 4904 | 539.9 | Lysine degradation                                                                                                                                                                                                                                              | 102   | 102.5 | 104.7 | 91    | 93.2  | 95.5  | 104.6 | 109.3 |
| 149275208 | Gm13304;<br>Ccl21b;<br>LOC1000<br>41504;<br>LOC1000<br>41593;<br>Gm21541;<br>LOC1008<br>62177;<br>Gm10591; | 133  | 14.6  | Chemokine signaling pathway; NF-kappa B signaling pathway; Cytokine-cytokine receptor interaction                                                                                                                                                               | 113   | 115.4 | 119.3 | 121.7 | 82.2  | 81.8  | 82.5  | 70.5  |
| 110431356 | Il6ra                                                                                                      | 460  | 50.4  | Jak-STAT signaling pathway; Non-alcoholic fatty liver disease (NAFLD); HIF-1 signaling pathway; PI3K-Akt signaling pathway; EGFR tyrosine kinase inhibitor resistance; Hematopoietic cell lineage; Cytokine-cytokine receptor interaction                       | 98.2  | 101.2 | 84.6  | 97.7  | 98.8  | 88.4  | 110   | 109.7 |
| 162417986 | Tdp1                                                                                                       | 609  | 68.5  |                                                                                                                                                                                                                                                                 | 110.3 | 102   | 101.2 | 96.1  | 86.2  | 92.7  | 109.9 | 96.7  |
| 70608137  | Brf1                                                                                                       | 676  | 73.8  |                                                                                                                                                                                                                                                                 |       | 101.8 |       | 82.4  |       | 105.2 |       | 97.4  |
| 21312636  | Xrcc4                                                                                                      | 326  | 37.1  | Non-homologous end-joining                                                                                                                                                                                                                                      |       |       |       |       |       |       |       |       |

|           |                   |      |       |                                                                                                                                                                                                                                                                |       |       |       |       |       |       |       |       |
|-----------|-------------------|------|-------|----------------------------------------------------------------------------------------------------------------------------------------------------------------------------------------------------------------------------------------------------------------|-------|-------|-------|-------|-------|-------|-------|-------|
| 13386096  | Ndufb2            | 105  | 12    | Metabolic pathways; Huntington's disease; Non-alcoholic fatty liver disease (NAFLD); Oxidative phosphorylation; Parkinson's disease; Alzheimer's disease                                                                                                       | 112.2 | 112.4 | 106.7 | 107.3 | 112.1 | 108.9 | 95.9  | 98.5  |
| 13385244  | Prkrip1           | 186  | 21.5  |                                                                                                                                                                                                                                                                | 109   | 103.9 | 108.1 | 108.3 | 91.6  | 92.1  | 104   | 108.3 |
| 85701534  | Zbtb45            | 520  | 55    |                                                                                                                                                                                                                                                                | 73.5  |       | 91.6  |       | 126.7 |       | 136.3 |       |
| 32189421  | Polr1d            | 126  | 14.4  |                                                                                                                                                                                                                                                                | 109.5 |       | 106.9 |       | 89.8  |       | 99.6  |       |
| 148277043 | Alg1              | 482  | 54.4  | Metabolic pathways; N-Glycan biosynthesis                                                                                                                                                                                                                      | 111.3 |       | 109.4 |       | 93.3  |       | 92.7  |       |
| 27229021  | Sdhd              | 159  | 17    | Citrate cycle (TCA cycle); Metabolic pathways; Huntington's disease; Non-alcoholic fatty liver disease (NAFLD); Oxidative phosphorylation; Parkinson's disease; Alzheimer's disease; Carbon metabolism                                                         | 105.4 | 104.1 | 89.9  | 89.5  | 94.3  | 91.2  | 102.8 | 99.5  |
| 6680009   | Gja8              | 440  | 49.6  |                                                                                                                                                                                                                                                                | 88.8  | 85.4  | 96.1  | 90    | 101.7 | 102.6 | 111.3 | 113.4 |
| 56790923  | Ncoa7             | 943  | 106.3 |                                                                                                                                                                                                                                                                |       |       |       |       |       |       |       |       |
| 149253812 | Gm1979            | 267  | 31.7  |                                                                                                                                                                                                                                                                | 93.1  |       | 103.5 |       | 106.5 |       | 120.7 |       |
| 158749545 | Slc25a40          | 337  | 37.9  |                                                                                                                                                                                                                                                                |       |       |       |       |       |       |       |       |
| 226437615 | 0610030E<br>20Rik | 166  | 18.6  |                                                                                                                                                                                                                                                                | 105.7 |       | 101.3 |       | 107.1 |       | 100.9 |       |
| 281182714 | Plscr3            | 296  | 31.8  |                                                                                                                                                                                                                                                                |       |       |       |       |       |       |       |       |
| 170172548 | Ube2q1            | 422  | 46.1  | Ubiquitin mediated proteolysis                                                                                                                                                                                                                                 |       | 91.7  |       | 87.1  |       | 96.3  |       | 108.9 |
| 254692928 | Samd4b            | 687  | 74.9  |                                                                                                                                                                                                                                                                |       | 95.5  |       | 80.1  |       | 90.8  |       | 99.2  |
| 30424703  | Fam53c            | 393  | 43.2  |                                                                                                                                                                                                                                                                | 124.3 |       | 89.2  |       | 93.3  |       | 99.7  |       |
| 162135948 | Zfp160            | 650  | 73.4  |                                                                                                                                                                                                                                                                | 83.2  |       | 94.8  |       | 112.8 |       | 123.1 |       |
| 13385074  | Rilpl2            | 197  | 22.4  |                                                                                                                                                                                                                                                                | 60    | 69.5  | 61.7  | 67.6  | 154.4 | 147.4 | 158.6 | 147   |
| 31791059  | Alcam             | 583  | 65.1  | Cell adhesion molecules (CAMs)                                                                                                                                                                                                                                 | 132.7 | 101.8 | 97.6  | 85.1  | 95.4  | 104.4 | 98.1  | 115.3 |
| 6754850   | Nfyb              | 207  | 22.8  | Tuberculosis; HTLV-I infection; Antigen processing and presentation                                                                                                                                                                                            | 97.1  |       | 115   |       | 96.1  |       | 87.2  |       |
| 6678654   | Lag3              | 521  | 56.9  |                                                                                                                                                                                                                                                                | 59.5  | 69.9  | 61.1  | 67.6  | 156.5 | 154.5 | 148.5 | 149.9 |
| 22164768  | Ccdc25            | 208  | 24.5  |                                                                                                                                                                                                                                                                | 103.4 | 95.3  | 98.8  | 95.1  | 88.1  | 96    | 110.1 | 127.3 |
| 329663747 | Atg16l1           | 623  | 69.8  |                                                                                                                                                                                                                                                                | 105.5 | 102   | 106   | 113   | 104   | 109.2 | 92.9  | 89.4  |
| 13386370  | Klc4              | 619  | 68.6  | Salmonella infection                                                                                                                                                                                                                                           |       |       |       |       |       |       |       |       |
| 49227135  | Zmym1             | 983  | 110.3 |                                                                                                                                                                                                                                                                | 103.6 | 96.6  | 77.8  | 86.5  | 123.9 | 116   | 126.1 | 106.9 |
| 295293138 | Dis3l             | 1053 | 120.2 | RNA degradation                                                                                                                                                                                                                                                | 95.6  | 98.6  | 99.2  | 100.3 | 113.7 | 115.4 | 99.8  | 100.8 |
| 22122613  | Habp2             | 517  | 57.3  |                                                                                                                                                                                                                                                                | 107   |       | 114.7 |       | 84    |       | 89.4  |       |
| 6754404   | Jund              | 341  | 34.9  | MAPK signaling pathway; Osteoclast differentiation                                                                                                                                                                                                             | 87.4  | 82.1  | 73.4  | 70.9  | 111.1 | 111.5 | 126.9 | 133.1 |
| 7710060   | Mapk8             | 384  | 44.2  | ErbB signaling pathway; FoxO signaling pathway; AGE-RAGE signaling pathway in diabetic complications; Herpes simplex infection; Wnt signaling pathway; Chagas disease (American trypanosomiasis); Retrograde endocannabinoid signaling; MAPK signaling pathway |       | 93.1  |       | 84.3  |       | 110.5 |       | 113   |
| 33469133  | Patz1             | 641  | 69.1  |                                                                                                                                                                                                                                                                |       |       |       |       |       |       |       |       |
| 6677917   | Sepw1;<br>Selenow | 88   | 9.7   |                                                                                                                                                                                                                                                                | 140.6 |       | 146.6 |       | 45    |       | 60.7  |       |



|           |                                |      |       |                                                                                                                |       |       |       |       |       |       |       |       |
|-----------|--------------------------------|------|-------|----------------------------------------------------------------------------------------------------------------|-------|-------|-------|-------|-------|-------|-------|-------|
| 9790165   | Tmem115                        | 350  | 38.1  |                                                                                                                | 99.9  | 117.8 | 87.8  | 75.8  | 97.3  | 122.6 | 104.9 | 96    |
| 262263441 | Rtel1                          | 1209 | 134.3 |                                                                                                                | 125.6 |       | 89.6  |       | 96.4  |       | 136.5 |       |
| 12963689  | Ankra2                         | 312  | 34    |                                                                                                                | 101.1 |       | 116.5 |       | 113.8 |       | 113.1 |       |
| 13626034  | Tfap4                          | 338  | 38.7  | Proteoglycans in cancer                                                                                        | 123.3 |       | 107.1 |       | 97.2  |       | 102.4 |       |
| 22779928  | Foxl2                          | 375  | 38.9  |                                                                                                                |       |       |       |       |       |       |       |       |
| 21450147  | Tmem63a                        | 804  | 91.8  |                                                                                                                |       |       |       |       |       |       |       |       |
| 83627709  | Arnt                           | 791  | 86.9  | HIF-1 signaling pathway; Pathways in cancer; Renal cell carcinoma; Chemical carcinogenesis                     |       |       |       |       |       |       |       |       |
| 29366814  | Fahd2a                         | 313  | 34.7  |                                                                                                                | 94    | 102.8 | 118.2 | 108.8 | 100.6 | 96.1  | 141   | 119.2 |
| 160358829 | Hpx                            | 460  | 51.3  |                                                                                                                | 224.1 | 227.3 | 203.6 | 232   | 60.7  | 57.5  | 58.5  | 51.2  |
| 241982768 | Nagpa                          | 517  | 56    | Lysosome                                                                                                       | 102.2 |       | 90.5  |       | 118.4 |       | 109.6 |       |
| 123701966 | Kctd12                         | 327  | 35.9  |                                                                                                                | 92.5  |       | 94.9  |       | 110.3 |       | 101.7 |       |
| 27229019  | Trit1                          | 467  | 52.4  | Metabolic pathways                                                                                             | 102   | 99.4  | 109.1 | 117.6 | 108.3 | 102.6 | 101.5 | 94.6  |
| 6671712   | Cd53                           | 219  | 24.1  |                                                                                                                | 68.8  | 59.1  | 73    | 69.1  | 142.4 | 135.9 | 126.3 | 130.8 |
| 27369868  | Scara3                         | 606  | 65.4  |                                                                                                                | 112.1 |       | 114   |       | 89.1  |       | 106.2 |       |
| 312147310 | Ralbp1                         | 648  | 75    | Ras signaling pathway; Pathways in cancer; Pancreatic secretion                                                |       | 88.6  |       | 87.7  |       | 113.8 |       | 104.5 |
| 407262514 | LOC101056428                   | 149  | 16.3  |                                                                                                                |       |       |       |       |       |       |       |       |
| 227499980 | Slc44a1                        | 653  | 73    | Choline metabolism in cancer                                                                                   |       |       |       |       |       |       |       |       |
| 283837868 | Zfp612                         | 672  | 76.1  |                                                                                                                | 56.6  |       | 87.6  |       | 137.3 |       | 137.3 |       |
| 124248514 | Ccdc64; Bicd11                 | 577  | 65.2  |                                                                                                                | 117   | 105.5 | 95    | 89.3  | 118.7 | 99.8  | 110.8 | 113   |
| 89363042  | Palmd                          | 551  | 62.6  |                                                                                                                | 107.3 |       | 98.8  |       | 100.7 |       | 114.6 |       |
| 160333680 | Itm2c                          | 269  | 30.5  |                                                                                                                | 105.5 |       | 98.9  |       | 108.9 |       | 98.3  |       |
| 45433590  | Arl6ip1                        | 203  | 23.4  |                                                                                                                | 91.8  |       | 84.6  |       | 99.2  |       | 110.4 |       |
| 124486628 | D430042O09Rik                  | 1610 | 179.5 |                                                                                                                | 94.3  | 91.1  | 116.7 | 117.9 | 91    | 90.6  | 96.9  | 94.2  |
| 6754212   | Hmox1                          | 289  | 32.9  | Mineral absorption; HIF-1 signaling pathway; Porphyrin and chlorophyll metabolism                              | 121.3 |       | 121.1 |       | 81.2  |       | 108.1 |       |
| 157266319 | Chst2                          | 530  | 57.8  | Glycosaminoglycan biosynthesis - keratan sulfate                                                               |       |       |       |       |       |       |       |       |
| 236468117 | Amy2a5; Amy2a2; Amy2a3; Amy2a4 | 508  | 57.3  | Pancreatic secretion; Carbohydrate digestion and absorption; Metabolic pathways; Starch and sucrose metabolism | 161   |       | 89.1  |       | 105   |       | 93.5  |       |
| 20452462  | Ttc1                           | 292  | 33.2  |                                                                                                                | 126.7 |       | 98.8  |       | 97.2  |       | 107.8 |       |
| 27370082  | Leng8                          | 785  | 86.7  |                                                                                                                | 101.8 | 102.5 | 100.9 | 107.3 | 85.3  | 83.5  | 96.8  | 93.6  |
| 225007605 | Ofd1                           | 1019 | 117.6 |                                                                                                                |       |       |       |       |       |       |       |       |
| 124486739 | Slc9a5                         | 898  | 98.9  |                                                                                                                | 76.1  |       | 99.5  |       | 99.2  |       | 72    |       |
| 83745112  | Clk3                           | 638  | 73.8  |                                                                                                                | 108.5 | 97.9  | 104.7 | 105.1 | 102.4 | 101.5 | 106.3 | 88.2  |
| 172088108 | Dnmt3b                         | 860  | 97.3  | MicroRNAs in cancer; Metabolic pathways; Cysteine and methionine metabolism                                    | 68    | 87.8  | 81    | 85.7  | 146.2 | 140.6 | 58.2  | 76.7  |

|           |                               |      |       |                                                                                                                                                                                           |       |       |       |       |       |       |       |       |
|-----------|-------------------------------|------|-------|-------------------------------------------------------------------------------------------------------------------------------------------------------------------------------------------|-------|-------|-------|-------|-------|-------|-------|-------|
| 170172540 | F3                            | 294  | 32.9  | AGE-RAGE signaling pathway in diabetic complications;<br>Complement and coagulation cascades                                                                                              |       |       |       |       |       |       |       |       |
| 253970431 | Jakmip3                       | 844  | 98.7  |                                                                                                                                                                                           |       |       |       |       |       |       |       |       |
| 56090231  | Dcaf5                         | 946  | 103.6 |                                                                                                                                                                                           | 104.2 | 105.8 | 116.5 | 104.4 | 99.4  | 108.6 | 88.7  | 97.9  |
| 8850219   | Hp                            | 347  | 38.7  |                                                                                                                                                                                           | 94.7  |       | 106.1 |       | 89.2  |       | 97.6  |       |
| 28076961  | 5730508B<br>09Rik;<br>Fam241a | 131  | 14.5  |                                                                                                                                                                                           | 111.2 |       | 86.5  |       | 110.6 |       | 109   |       |
| 213512857 | Nsl1                          | 281  | 31.7  |                                                                                                                                                                                           | 87.3  |       | 84.9  |       | 126.7 |       | 110.4 |       |
| 21703932  | Lrrc14                        | 493  | 54.9  |                                                                                                                                                                                           | 111.5 |       | 96.3  |       | 91.4  |       | 88.8  |       |
| 45269152  | Il7r                          | 459  | 51.6  | FoxO signaling pathway; Primary immunodeficiency; Jak-<br>STAT signaling pathway; PI3K-Akt signaling pathway;<br>Hematopoietic cell lineage; Cytokine-cytokine receptor<br>interaction    | 104.3 |       | 112.2 |       | 85.4  |       | 84.5  |       |
| 13385358  | Cdk5rap1                      | 588  | 66.1  |                                                                                                                                                                                           | 96.9  |       | 96.2  |       | 111.7 |       | 99    |       |
| 13385058  | Ccdc59                        | 240  | 28    |                                                                                                                                                                                           | 111.8 |       | 102.6 |       | 105.6 |       | 97.4  |       |
| 118150662 | Shprh                         | 1674 | 191.4 |                                                                                                                                                                                           | 107   |       | 98    |       | 92.5  |       | 98.8  |       |
| 304766513 | Grik4                         | 956  | 107.2 | Glutamatergic synapse; Neuroactive ligand-receptor<br>interaction                                                                                                                         | 106.2 | 103.5 | 110.8 | 101.9 | 87.5  | 104.9 | 86    | 90.4  |
| 169234621 | Aff3                          | 1228 | 133.1 |                                                                                                                                                                                           | 103.2 |       | 82.8  |       | 103.8 |       | 127.4 |       |
| 227496621 | Slc26a7                       | 656  | 71.8  | Gastric acid secretion                                                                                                                                                                    | 63.4  | 56    | 121   | 126.3 | 144.9 | 150.2 | 95.2  | 90.5  |
| 31745185  | Snape3                        | 407  | 46.2  |                                                                                                                                                                                           |       |       |       |       |       |       |       |       |
| 148747485 | Nedd9                         | 833  | 93    |                                                                                                                                                                                           | 101.5 |       | 108   |       | 94.6  |       | 100.6 |       |
| 226874931 | Sidt1                         | 832  | 94.4  |                                                                                                                                                                                           | 106.8 |       | 134.1 |       | 79.8  |       | 89.2  |       |
| 87299630  | Rrn3                          | 656  | 74.5  |                                                                                                                                                                                           |       |       |       |       |       |       |       |       |
| 31542445  | Cyp7a1                        | 503  | 57.2  | PPAR signaling pathway; Steroid hormone biosynthesis;<br>Metabolic pathways; Primary bile acid biosynthesis; Bile<br>secretion                                                            | 106.6 | 117.4 | 102.1 | 105.4 | 100.5 | 97.5  | 98.5  | 88.7  |
| 194473718 | Ccdc75;<br>Gpatch11           | 264  | 30.8  |                                                                                                                                                                                           | 100.5 |       | 110.1 |       | 97    |       | 94.4  |       |
| 58037511  | 6030458C<br>11Rik             | 442  | 49.4  |                                                                                                                                                                                           |       | 114   |       | 129.9 |       | 95.9  |       | 100.3 |
| 30172570  | Dnali1                        | 258  | 29.7  | Huntington's disease                                                                                                                                                                      | 81.5  |       | 93.8  |       | 113.4 |       | 55.9  |       |
| 22122839  | Tbc1d13                       | 400  | 46.4  |                                                                                                                                                                                           |       |       |       |       |       |       |       |       |
| 21703986  | Pi4k2a                        | 479  | 54.2  | Metabolic pathways; Inositol phosphate metabolism;<br>Phosphatidylinositol signaling system                                                                                               |       |       |       |       |       |       |       |       |
| 31560022  | Gys1                          | 738  | 83.9  | Insulin signaling pathway; Metabolic pathways; Insulin<br>resistance; Starch and sucrose metabolism; PI3K-Akt<br>signaling pathway; AMPK signaling pathway; Glucagon<br>signaling pathway | 96.3  | 99.1  | 93.7  | 80.3  | 120.8 | 109.5 | 81.3  | 76.4  |
| 18250288  | D17Wsu1<br>04e;               | 166  | 18    |                                                                                                                                                                                           | 99.7  | 95.1  | 92.7  | 87.6  | 107.7 | 115.2 | 123.8 | 132.3 |
| 111494221 | Fbxl20                        | 436  | 48.4  |                                                                                                                                                                                           | 111.4 | 98.9  | 100.1 | 87.8  | 85.8  | 101.8 | 112.9 | 92.6  |
| 21313074  | L3hypdh                       | 354  | 37.8  | Arginine and proline metabolism                                                                                                                                                           | 127.3 |       | 99.6  |       | 94.4  |       | 92.7  |       |

|           |                             |      |       |                                                                                                                                                                                                                                                                 |       |       |       |       |       |       |       |       |
|-----------|-----------------------------|------|-------|-----------------------------------------------------------------------------------------------------------------------------------------------------------------------------------------------------------------------------------------------------------------|-------|-------|-------|-------|-------|-------|-------|-------|
| 254939708 | Unc80                       | 3326 | 370.3 |                                                                                                                                                                                                                                                                 | 77.9  |       | 82.1  |       | 80.2  |       | 142.6 |       |
| 254028183 | Pcgf2                       | 342  | 37.7  | Signaling pathways regulating pluripotency of stem cells                                                                                                                                                                                                        | 87.2  |       | 93.8  |       | 113.2 |       | 132.1 |       |
| 254675212 | Dennd1a                     | 1016 | 111.5 |                                                                                                                                                                                                                                                                 |       | 116.1 |       | 99.2  |       | 106.1 |       | 89.3  |
| 226437639 | Emp3                        | 163  | 18.2  |                                                                                                                                                                                                                                                                 |       | 98.1  |       | 114.5 |       | 82.9  |       | 81.5  |
| 6753854   | Fgf5                        | 264  | 29.1  | Regulation of actin cytoskeleton; MAPK signaling pathway; Ras signaling pathway; Breast cancer; Melanoma; Rap1 signaling pathway; Pathways in cancer; PI3K-Akt signaling pathway                                                                                |       |       |       |       |       |       |       |       |
| 124486863 | Gm12695                     | 545  | 62.4  |                                                                                                                                                                                                                                                                 | 72.7  | 79.5  | 100.8 | 104.4 | 122.6 | 115.5 | 126.8 | 142.6 |
| 12963603  | Ndufaf3                     | 185  | 20.7  |                                                                                                                                                                                                                                                                 | 95.5  |       | 92.7  |       | 97.2  |       | 104.5 |       |
| 27754160  | Polr3f                      | 316  | 35.6  | RNA polymerase; Epstein-Barr virus infection; Metabolic pathways; Purine metabolism; Pyrimidine metabolism; Cytosolic DNA-sensing pathway                                                                                                                       | 114.4 | 105.7 | 104   | 97.1  | 101.7 | 103   | 99.4  | 135.2 |
| 27369660  | Nlrp4b                      | 863  | 99.9  |                                                                                                                                                                                                                                                                 |       |       |       |       |       |       |       |       |
| 40254346  | Paqr8                       | 354  | 40.4  |                                                                                                                                                                                                                                                                 | 87.3  |       | 101.7 |       | 94.1  |       | 114.1 |       |
| 71773932  | 2810417H<br>13Rik;<br>Pclaf | 110  | 12    |                                                                                                                                                                                                                                                                 | 34.9  | 35.4  | 38.9  | 34.1  | 166.8 | 157.8 | 198.3 | 204.2 |
| 251823802 | Usp16                       | 825  | 93.4  |                                                                                                                                                                                                                                                                 | 92.7  |       | 93.7  |       | 100.4 |       | 104.3 |       |
| 124430547 | Rsb11                       | 821  | 91.7  |                                                                                                                                                                                                                                                                 | 104.2 | 121.7 | 100.2 | 107.5 | 92.4  | 89    | 101.6 | 59.9  |
| 58037550  | Bcl211                      | 233  | 26.1  | Platinum drug resistance; Ras signaling pathway; Amyotrophic lateral sclerosis (ALS); NOD-like receptor signaling pathway; Jak-STAT signaling pathway; Toxoplasmosis; Small cell lung cancer; HTLV-I infection; Apoptosis - multiple species; Transcriptional m | 92.9  |       | 76.5  |       | 122.7 |       | 130.3 |       |
| 21312638  | Cers5;<br>Lass5             | 414  | 48.1  | Metabolic pathways; Sphingolipid signaling pathway; Sphingolipid metabolism                                                                                                                                                                                     | 79.5  |       | 87.4  |       | 111.6 |       | 121.6 |       |
| 13385354  | Golt1b                      | 138  | 15.4  |                                                                                                                                                                                                                                                                 | 86.5  |       | 81.2  |       | 112   |       | 118.7 |       |
| 53988376  | Rsrc2                       | 434  | 50.6  |                                                                                                                                                                                                                                                                 | 117.9 | 96.2  | 116.7 | 92.8  | 83.6  | 84.1  | 105.4 | 118.4 |
| 10181218  | Gmn                         | 206  | 23.3  |                                                                                                                                                                                                                                                                 | 67.8  |       | 58.3  |       | 149.5 |       | 169.9 |       |
| 242247225 | Spata13                     | 1244 | 138   |                                                                                                                                                                                                                                                                 | 91    |       | 97.1  |       | 96.4  |       | 93.6  |       |
| 157951633 | Ehmt1                       | 1296 | 141.9 | Lysine degradation; Longevity regulating pathway                                                                                                                                                                                                                | 115.8 |       | 121.1 |       | 85.8  |       | 117.4 |       |
| 6678461   | Tgoln2                      | 363  | 38.8  |                                                                                                                                                                                                                                                                 |       |       |       |       |       |       |       |       |
| 6679449   | Inpp5k                      | 468  | 54.1  | Insulin signaling pathway; Metabolic pathways; Inositol phosphate metabolism; Phosphatidylinositol signaling                                                                                                                                                    | 104.9 |       | 123.5 |       | 125.8 |       | 55.4  |       |
| 118722338 | Tex15                       | 2785 | 311.1 |                                                                                                                                                                                                                                                                 | 86.6  |       | 92.1  |       | 106.9 |       | 97    |       |
| 11612515  | Herpud1                     | 391  | 43.9  | Protein processing in endoplasmic reticulum                                                                                                                                                                                                                     |       |       |       |       |       |       |       |       |
| 24431937  | Nmral1                      | 309  | 34.4  |                                                                                                                                                                                                                                                                 | 92.7  | 84.6  | 104.5 | 98.2  | 110.4 | 114.6 | 113.5 | 106.2 |
| 21450201  | Micu1                       | 477  | 54.3  |                                                                                                                                                                                                                                                                 | 88.1  | 88.8  | 94.1  | 82.9  | 120.3 | 132.8 | 114.8 | 113.4 |
| 133778985 | Taf1c                       | 836  | 92    |                                                                                                                                                                                                                                                                 |       | 112.2 |       | 84.3  |       | 103.5 |       | 100.3 |
| 33186914  | Spata4                      | 295  | 33.6  |                                                                                                                                                                                                                                                                 | 96.1  |       | 99    |       | 99.4  |       | 103.4 |       |



|           |                         |      |       |                                                                                                                                                                                                                                         |       |       |       |       |       |       |       |       |
|-----------|-------------------------|------|-------|-----------------------------------------------------------------------------------------------------------------------------------------------------------------------------------------------------------------------------------------|-------|-------|-------|-------|-------|-------|-------|-------|
| 9507195   | Tnfsf14                 | 239  | 26.3  | Herpes simplex infection; NF-kappa B signaling pathway; Cytokine-cytokine receptor interaction                                                                                                                                          |       |       |       |       |       |       |       |       |
| 124486973 | Prmt10;<br>Prmt9        | 846  | 94.1  |                                                                                                                                                                                                                                         | 91.7  |       | 91    |       | 90    |       | 91.2  |       |
| 6679647   | Endog                   | 294  | 32.2  | Apoptosis                                                                                                                                                                                                                               |       | 127.9 |       | 124.5 |       | 79.9  |       | 81.6  |
| 164419751 | Gria4                   | 902  | 100.7 |                                                                                                                                                                                                                                         |       |       |       |       |       |       |       |       |
| 21312456  | Tmem68                  | 329  | 37.8  |                                                                                                                                                                                                                                         |       |       |       |       |       |       |       |       |
| 66730565  | Trappc1                 | 145  | 16.9  |                                                                                                                                                                                                                                         | 97.3  | 95.4  | 107   | 107.6 | 108.4 | 100.1 | 91.4  | 98.3  |
| 124486793 | Rtkn2                   | 602  | 66.7  |                                                                                                                                                                                                                                         |       |       |       |       |       |       |       |       |
| 254540060 | Phtf1                   | 761  | 86.7  |                                                                                                                                                                                                                                         | 116.6 |       | 115   |       | 106.1 |       | 87.5  |       |
| 101943563 | Slc6a18                 | 615  | 69.2  |                                                                                                                                                                                                                                         |       |       |       |       |       |       |       |       |
| 167830449 | Ino80d                  | 1021 | 112.3 |                                                                                                                                                                                                                                         | 94.6  | 105   | 78    | 85.3  | 110.4 | 105.5 | 124.4 | 118.5 |
| 19527112  | Slc15a4                 | 574  | 62.2  |                                                                                                                                                                                                                                         | 109   | 98.9  | 136.3 | 98.8  | 97.1  | 110.7 | 85.5  | 110.1 |
| 27370332  | Gpatch3                 | 525  | 59.1  |                                                                                                                                                                                                                                         | 103.3 |       | 101.4 |       | 92.2  |       | 98.9  |       |
| 6679263   | Pdha2                   | 391  | 43.4  | Pyruvate metabolism; Citrate cycle (TCA cycle); Metabolic pathways; Glycolysis / Gluconeogenesis; HIF-1 signaling pathway; Carbon metabolism; Central carbon metabolism in cancer; Glucagon signaling pathway                           | 130.2 | 125.3 | 134.6 | 140.7 | 95    | 85    | 70.4  | 50.9  |
| 111074529 | Col12a1                 | 3061 | 333.1 |                                                                                                                                                                                                                                         | 88.2  |       | 117.6 |       | 97.6  |       | 95.6  |       |
| 13385072  | Tceanc2;<br>Tdeanc2     | 207  | 24.2  |                                                                                                                                                                                                                                         | 94.1  |       | 104.6 |       | 122.1 |       | 109.5 |       |
| 30840984  | Smyd2                   | 433  | 49.5  |                                                                                                                                                                                                                                         |       |       |       |       |       |       |       |       |
| 328887920 | Tyk2                    | 1207 | 135.8 | Herpes simplex infection; NOD-like receptor signaling pathway; Jak-STAT signaling pathway; Toxoplasmosis; Epstein-Barr virus infection; Osteoclast differentiation; Influenza A; Hepatitis C; Th1 and Th2 cell differentiation; Measles |       |       |       |       |       |       |       |       |
| 312283741 | Spe25                   | 226  | 26.4  |                                                                                                                                                                                                                                         | 61.5  |       | 36.2  |       | 179.3 |       | 202.2 |       |
| 124486588 | Etl4                    | 1997 | 218.3 |                                                                                                                                                                                                                                         | 99.6  |       | 126.8 |       | 62.3  |       | 106.7 |       |
| 53749210  | Ppp1r26                 | 1163 | 124.9 |                                                                                                                                                                                                                                         | 70.5  |       | 92.8  |       | 110.9 |       | 138.2 |       |
| 71143102  | Atad5                   | 1826 | 203.8 |                                                                                                                                                                                                                                         |       |       |       |       |       |       |       |       |
| 219521862 | Fam70b;<br>Tmem255<br>b | 328  | 35    |                                                                                                                                                                                                                                         |       |       |       |       |       |       |       |       |
| 120587001 | Spen                    | 3643 | 398.3 |                                                                                                                                                                                                                                         |       | 129.4 |       | 105.8 |       | 105.2 |       | 110.8 |
| 28076933  | Selrc1;<br>Coa7         | 231  | 25.6  |                                                                                                                                                                                                                                         |       | 104.8 |       | 90.9  |       | 105.6 |       | 117.3 |
| 157151761 | Vmn2r97                 | 861  | 99.1  |                                                                                                                                                                                                                                         |       |       |       |       |       |       |       |       |
| 113931162 | Hormad2                 | 306  | 34.8  |                                                                                                                                                                                                                                         | 108.8 |       | 123.7 |       | 88.5  |       | 70.5  |       |
| 170650597 | Fam114a1                | 569  | 61    |                                                                                                                                                                                                                                         | 94.5  | 101.3 | 124.7 | 129.7 | 82.7  | 87.1  | 90.1  | 86    |
| 29244264  | Ccdc60                  | 545  | 62.9  |                                                                                                                                                                                                                                         |       |       |       |       |       |       |       |       |
| 269914091 | Mtbp                    | 894  | 100.3 |                                                                                                                                                                                                                                         | 74    |       | 132.2 |       | 122.2 |       | 96.6  |       |

|           |                                    |      |       |                                                                                                                                                                                                                                                                 |       |       |       |       |       |       |       |       |
|-----------|------------------------------------|------|-------|-----------------------------------------------------------------------------------------------------------------------------------------------------------------------------------------------------------------------------------------------------------------|-------|-------|-------|-------|-------|-------|-------|-------|
| 253795525 | Ccdc147;<br>Cfap58                 | 873  | 103.5 |                                                                                                                                                                                                                                                                 | 123.8 |       | 94.7  |       | 91.3  |       | 107.5 |       |
| 91982738  | Ctnbp2                             | 1648 | 178.7 |                                                                                                                                                                                                                                                                 | 91.8  |       | 95.9  |       | 128.9 |       | 49.9  |       |
| 121949800 | Zrsr2                              | 541  | 64.4  |                                                                                                                                                                                                                                                                 | 100.5 | 96.2  | 121.3 | 116.5 | 111.5 | 111.8 | 68.2  | 71.1  |
| 85702045  | Slc47a2                            | 573  | 61.7  |                                                                                                                                                                                                                                                                 |       |       |       |       |       |       |       |       |
| 90017457  | Fdx11                              | 174  | 18.8  |                                                                                                                                                                                                                                                                 | 121.4 | 126.1 | 98.7  | 110   | 99.1  | 95.5  | 106.7 | 97    |
| 89242143  | Arhgap12                           | 838  | 95.3  |                                                                                                                                                                                                                                                                 |       |       |       |       |       |       |       |       |
| 165905627 | Letm2                              | 480  | 54.4  |                                                                                                                                                                                                                                                                 |       |       |       |       |       |       |       |       |
| 117647238 | Zbtb7a                             | 569  | 60.2  |                                                                                                                                                                                                                                                                 | 115.3 |       | 103.5 |       | 114.2 |       | 112.5 |       |
| 89111949  | Mtl5;<br>Tesmin                    | 475  | 50.6  |                                                                                                                                                                                                                                                                 |       |       |       |       |       |       |       |       |
| 30520009  | Supt3;<br>Supt3h                   | 374  | 41.2  | Transcriptional misregulation in cancer                                                                                                                                                                                                                         | 93.6  | 95.3  | 101.4 | 105.2 | 85.4  | 88.8  | 107.1 | 105.9 |
| 30519896  | Abhd16a                            | 558  | 63    |                                                                                                                                                                                                                                                                 | 85.2  | 158.7 | 115.4 | 101.7 | 95.6  | 85.1  | 108.2 | 96.7  |
| 209863004 | Anxa10                             | 324  | 37.3  |                                                                                                                                                                                                                                                                 | 97.3  |       | 105.9 |       | 100.8 |       | 94.9  |       |
| 149274289 | LOC6407<br>93;<br>LOC1026<br>42448 | 355  | 40.4  |                                                                                                                                                                                                                                                                 | 69.7  | 79.7  | 57.3  | 67.5  | 55    | 76    | 89.8  | 64.3  |
| 269784741 | Mrpl33                             | 65   | 7.4   | Ribosome                                                                                                                                                                                                                                                        | 111.6 |       | 106.9 |       | 103.3 |       | 115.7 |       |
| 6678323   | Tgfbr1                             | 503  | 56.1  | FoxO signaling pathway; AGE-RAGE signaling pathway in diabetic complications; Endocytosis; Chagas disease (American trypanosomiasis); MAPK signaling pathway; Hippo signaling pathway; Hepatitis B; HTLV-I infection; Osteoclast differentiation; Adherens junc | 96.3  |       | 111   |       | 147.1 |       | 66.1  |       |
| 377833725 | Dnah14;<br>Dnahc14                 | 4601 | 528.1 |                                                                                                                                                                                                                                                                 | 105.1 |       | 88.5  |       | 130.9 |       | 105.4 |       |
| 282847432 | Olf1022                            | 315  | 35.5  | Olfactory transduction                                                                                                                                                                                                                                          |       |       |       |       |       |       |       |       |
| 17105326  | Asb11                              | 294  | 31.9  |                                                                                                                                                                                                                                                                 |       |       |       |       |       |       |       |       |
| 268370248 | AI846148                           | 381  | 41.2  |                                                                                                                                                                                                                                                                 |       | 130.6 |       | 96.7  |       | 173.4 |       | 71.9  |
| 9790041   | Ube2a                              | 152  | 17.3  | Ubiquitin mediated proteolysis                                                                                                                                                                                                                                  | 96.5  |       | 91.5  |       | 107.6 |       | 111.5 |       |
| 83423518  | Kcnh6                              | 950  | 105.5 |                                                                                                                                                                                                                                                                 | 191.4 | 182.5 | 87.2  | 97.2  | 63    | 45.6  | 63.4  | 68    |
| 253795532 | Baiap3                             | 1150 | 129   | Transcriptional misregulation in cancer                                                                                                                                                                                                                         | 96.4  |       | 110.8 |       | 96.3  |       | 89    |       |
| 254553291 | Rabggtb                            | 339  | 37.8  |                                                                                                                                                                                                                                                                 | 98.5  | 108.1 | 89.6  | 94.2  | 119.3 | 118.9 | 71.6  | 102.7 |
| 359718971 | Scn5a                              | 2020 | 227.6 | Adrenergic signaling in cardiomyocytes                                                                                                                                                                                                                          | 129   |       | 80.3  |       | 96    |       | 124.6 |       |
| 283046757 | Heatr7a;<br>Mroh1                  | 1640 | 181.7 |                                                                                                                                                                                                                                                                 |       |       |       |       |       |       |       |       |
| 407261488 | Gm6871                             | 800  | 93.1  |                                                                                                                                                                                                                                                                 | 124   |       | 99.1  |       | 99.3  |       | 95.2  |       |
| 309266395 | Gm22;<br>Zfp469                    | 3765 | 403.3 |                                                                                                                                                                                                                                                                 | 108.3 |       | 95.4  |       | 115.3 |       | 108.6 |       |
| 126116574 | Nacad                              | 1504 | 156.7 |                                                                                                                                                                                                                                                                 | 88.8  |       | 95.3  |       | 115.7 |       | 98.5  |       |
| 170287745 | Bet11                              | 111  | 12.4  | SNARE interactions in vesicular transport                                                                                                                                                                                                                       | 101.1 | 100.4 | 89.9  | 92.5  | 96.2  | 101.1 | 108   | 112.6 |

|           |                      |      |       |                                                                                                                                |       |       |       |       |       |       |       |       |
|-----------|----------------------|------|-------|--------------------------------------------------------------------------------------------------------------------------------|-------|-------|-------|-------|-------|-------|-------|-------|
| 58372136  | Olfir1037            | 321  | 36.1  | Olfactory transduction                                                                                                         |       |       |       |       |       |       |       |       |
| 326537283 | Jdp2                 | 163  | 18.7  |                                                                                                                                |       |       |       |       |       |       |       |       |
| 254675217 | Vps18                | 973  | 110.1 |                                                                                                                                | 92.9  | 112.5 | 110.3 | 124.7 | 99.2  | 97.1  | 101.5 | 82.7  |
| 30520029  | Atcay                | 372  | 42.2  |                                                                                                                                | 89.9  |       | 104.6 |       | 118.5 |       | 103.5 |       |
| 188497661 | Mlxip                | 917  | 100.7 | Insulin resistance; Non-alcoholic fatty liver disease (NAFLD)                                                                  | 90.2  |       | 93.8  |       | 101   |       | 97.6  |       |
| 14141185  | Cftr                 | 1476 | 167.8 | Pancreatic secretion; ABC transporters; Bile secretion; cAMP signaling pathway; AMPK signaling pathway; Gastric acid secretion |       |       |       |       |       |       |       |       |
| 344925843 | Atpaf1               | 348  | 38.8  |                                                                                                                                | 98.2  |       | 100.8 |       | 100.9 |       | 79.1  |       |
| 145699097 | Ush2a                | 5193 | 569.3 |                                                                                                                                | 126.5 | 114.9 | 119.9 | 121.2 | 90.3  | 98.1  | 89.5  | 90.3  |
| 71067104  | Snrnp48              | 337  | 39.4  |                                                                                                                                | 104.4 |       | 117.6 |       | 89.9  |       | 97.2  |       |
| 31542385  | Chek1                | 476  | 54.3  | p53 signaling pathway; HTLV-I infection; Cell cycle; Viral carcinogenesis                                                      | 75.8  | 72.9  | 58.6  | 57.2  | 213.4 | 220.8 | 84.2  | 89    |
| 158711692 | Tnk2                 | 1055 | 116.9 |                                                                                                                                |       |       |       |       |       |       |       |       |
| 58037351  | Ccdc3                | 273  | 31.1  |                                                                                                                                |       |       |       |       |       |       |       |       |
| 218505678 | Kbtbd12              | 466  | 53    |                                                                                                                                | 118.4 | 116.7 | 100   | 106.8 | 75.5  | 74.8  | 93.7  | 88.6  |
| 268370209 | Rnls                 | 182  | 20.2  |                                                                                                                                |       |       |       |       |       |       |       |       |
| 255683429 | Skor1                | 936  | 97    |                                                                                                                                |       |       |       |       |       |       |       |       |
| 145279175 | Myom1                | 1667 | 185.3 |                                                                                                                                | 96.9  |       | 115.7 |       | 110.2 |       | 103.5 |       |
| 30520189  | Zbtb1                | 713  | 81.9  |                                                                                                                                | 114.1 |       | 90.9  |       | 107.4 |       | 97.9  |       |
| 66955864  | Zfp579               | 562  | 60.8  |                                                                                                                                | 104.8 |       | 109.7 |       | 113.3 |       | 93    |       |
| 256355065 | Sftpc                | 193  | 21    |                                                                                                                                | 314.9 |       | 69.5  |       | 64.1  |       | 78.6  |       |
| 21040227  | Asb18                | 467  | 50.7  |                                                                                                                                |       |       |       |       |       |       |       |       |
| 160333733 | Olfir725             | 321  | 36.4  | Olfactory transduction                                                                                                         | 106.3 | 98.4  | 107.9 | 113.2 | 104.1 | 106.1 | 101.2 | 96.4  |
| 188528622 | Actr8                | 624  | 70.5  |                                                                                                                                |       | 109.6 |       | 92.6  |       | 117.2 |       | 96.3  |
| 12408290  | Sap30                | 220  | 23.2  |                                                                                                                                | 90.4  | 87.3  | 89.8  | 87.1  | 118.1 | 118.1 | 109   | 111.1 |
| 17975502  | Metap1d              | 335  | 37.2  |                                                                                                                                | 90.2  |       | 115.8 |       | 106.8 |       | 91.3  |       |
| 257471034 | Rnf14                | 485  | 54.9  |                                                                                                                                | 124.2 | 117.7 | 105.1 | 100.9 | 91    | 91.4  | 88.3  | 92.4  |
| 299522791 | Ddah2                | 285  | 29.6  |                                                                                                                                | 122.7 |       | 98.9  |       | 106.5 |       | 112   |       |
| 226053365 | AI836003;<br>Ccdc184 | 191  | 20.2  |                                                                                                                                |       |       |       |       |       |       |       |       |
| 117168295 | Dcc                  | 1447 | 158.2 | Axon guidance; Pathways in cancer; Colorectal cancer                                                                           | 81    |       | 89.4  |       | 110.3 |       | 130.5 |       |
